# Supplementary material for: Unravelling microRNA regulation and miRNA–mRNA regulatory networks in osteogenesis driven by 3D nanotopographical cues
Source: Royal Society of Chemistry journal article supplement (doi:10.1039/d3bm01597a), 2023-12-21
Supplement: d3bm01597a1.xlsx [file d3bm01597a1.xlsx]

## Sheet: ReadMe
Sample 1: Cells in 2D, Growth medium
Sample 2: Cells in 2D, Osteogenic medium
Description of worksheets
ReadMe	Current Sheet
Summary	Statistics of expressed genes
Up_Regulated	Significant differential gene expression result of Sample 1 vs Sample 2 (UP Regulated)
Down_Regulated	Significant differential gene expression result of Sample 1 vs Sample 2 (DOWN Regulated)
Neutrally_Regulated	Significant differential gene expression result of Sample 1 vs Sample 2 (NEUTRAL Regulated)
Expressed only 1	Genes which are expressed only in 1
Expressed only 2	Genes which are expressed only in 2
P_Signicant	Genes having P-value as <=0.05
Description of columns in the worksheets
Cuffmerge Gene ID	Gene ID assigned by Cuffmerge
Gene Name	Name of Gene
Chromosome	Name of the chromosome
Gene Start (bp)	Gene start in base pair
Gene End (bp)	Gene end in base pair
FPKM 1	FPKM* of the gene in the sample 1
FPKM 2	FPKM* of the gene in the sample 2
log2(fold_change)	The (base 2) log of the fold change y/x. log2(FPKMc/FPKMb)
P_value	The uncorrected p-value of the test statistic
Q_value	The FDR-adjusted p-value of the test statistic
Regulation	UP / DOWN/ NEUTRAL
* Fragments Per Kilobase of exon per Million fragments mapped (measure of relative abundance of genes)

## Sheet: Summary
DGE Statistics
Summary	Total	Up	Down	Neutral
No. of genes expressed in both samples	14175	950	1042	12183
No. of genes expressed only in 1	173	NA	NA	NA
No. of genes expressed only in 2	193	NA	NA	NA
No. of p significant genes	609	305	300	4
Software used for carrying out DGE	Cuffdiff
Sample taken as control for DGE	1
Sample taken as treatment for DGE	2

## Sheet: Up_Regulated
Cuffmerge Gene ID	Gene Name	Chromosome	Gene Start (bp)	Gene End (bp)	FPKM 1	FPKM 2	log2(fold_change)	P_value	Q_value	Regulation
XLOC_004247	CADM3-AS1	1	159171608	159207973	0.137256	456.73	11.7003	0.46845	0.99965	UP
XLOC_001675	ACKR1,CADM3	1	159171608	159207973	0.156752	507.252	11.66	0.00215	0.165413	UP
XLOC_029871	APOB	2	21001428	21044073	0.00305173	1.8866	9.27195	0.17365	0.99965	UP
XLOC_034731	GGT5	22	24219653	24245142	0.318963	54.4987	7.41669	0.00015	0.0253622	UP
XLOC_005219	OLAH	10	15032226	15073852	0.02853	4.68406	7.35914	0.00995	0.42305	UP
XLOC_040041	ADH1B	4	99304963	99321442	0.244442	38.6008	7.303	0.0046	0.262308	UP
XLOC_047350	LEP	7	128241283	128257628	0.0779011	11.7309	7.23445	0.0323	0.857712	UP
XLOC_034154	SUSD2	22	24181258	24189110	0.208763	27.6731	7.05048	0.00055	0.0644964	UP
XLOC_001842	FMO3	1	171090876	171117819	0.0226214	2.64359	6.86867	0.0156	0.560098	UP
XLOC_026083	C5AR1	19	47290022	47322066	0.019695	1.90261	6.59401	0.1256	0.99965	UP
XLOC_004250	RP11-550P17.5	1	159346165	159483376	0.0470973	4.31971	6.51915	0.2378	0.99965	UP
XLOC_038643	PF4V1	4	73853188	73854155	0.237315	20.2884	6.41771	0.1628	0.99965	UP
XLOC_033936	AC008132.13	22	18846810	18861049	0.00785912	0.572091	6.18573	0.09245	0.99965	UP
XLOC_007360	LSP1	11	1852969	1892267	0.481538	34.6266	6.16809	0.0001	0.0191329	UP
XLOC_007368	IGF2-AS	11	2129111	2161341	0.0237578	1.70103	6.16187	0.1296	0.99965	UP
XLOC_026681	MYO1F	19	8520789	8577577	0.010221	0.725754	6.14987	0.00025	0.0363525	UP
XLOC_014612	RP11-102K13.5	13	113399609	113405572	0.0145761	0.901766	5.95108	0.1628	0.99965	UP
XLOC_038030	APOD	3	195568701	195584205	0.205741	12.029	5.86954	0.0197	0.652523	UP
XLOC_034155	POM121L9P	22	24251827	24265525	0.0529253	2.93342	5.79248	0.01345	0.510442	UP
XLOC_009185	SAA2,SAA2-SAA4,SAA4	11	18112471	18248643	0.103376	5.262	5.66964	0.00465	0.264124	UP
XLOC_008940	IGF2,INS,INS-IGF2	11	2129111	2161341	12.9254	654.164	5.66137	5e-05	0.0106919	UP
XLOC_032093	KCNK15	20	44656450	44810338	0.0173647	0.863782	5.63644	0.23165	0.99965	UP
XLOC_008939	H19,MIR675	11	1995162	2001470	0.236313	11.0084	5.54176	0.0001	0.0191329	UP
XLOC_013880	MYO16	13	108596151	109208007	0.0143164	0.656791	5.5197	0.02855	0.796824	UP
XLOC_012203	TMTC1	12	29500839	29784759	0.331141	14.9261	5.49424	5e-05	0.0106919	UP
XLOC_036653	TIMP4	3	12004401	12191400	0.0854058	3.61347	5.40291	0.09815	0.99965	UP
XLOC_028031	VIT	2	36696689	36814792	0.090799	3.70493	5.35063	0.0087	0.395136	UP
XLOC_058290	MAOA	X	43654906	43746824	0.104178	4.24843	5.3498	0.00995	0.42305	UP
XLOC_053163	OMD	9	92297357	92670265	0.0555169	2.17173	5.28977	0.21025	0.99965	UP
XLOC_011213	IRAK3	12	66188878	66257434	0.0152427	0.57865	5.2465	0.24255	0.99965	UP
XLOC_039699	CORIN	4	47593997	47838106	0.203094	7.37265	5.18196	5e-05	0.0106919	UP
XLOC_010091	MMP12	11	102862735	102875034	0.0247352	0.834871	5.07692	0.2435	0.99965	UP
XLOC_027193	PPP1R14A	19	38244034	38305009	1.38282	45.3602	5.03575	0.00385	0.236215	UP
XLOC_037919	LAMP3	3	183122212	183163839	0.0653171	2.13768	5.03244	0.0214	0.679427	UP
XLOC_013486	LINC00547	13	37534939	37551536	0.0536828	1.73777	5.01664	0.06535	0.99965	UP
XLOC_023131	CCL5	17	35868966	35885863	0.0763908	2.32503	4.92771	0.1446	0.99965	UP
XLOC_010093	MMP13	11	102942994	102955734	0.0497002	1.48322	4.89934	0.0396	0.933264	UP
XLOC_048687	NRCAM	7	108147622	108456717	0.789427	22.8618	4.85599	5e-05	0.0106919	UP
XLOC_011316	OTOGL	12	80209452	80379090	0.0961571	2.46246	4.67856	0.0024	0.176255	UP
XLOC_017068	GCHFR	15	40764019	40815084	0.0691415	1.76155	4.67115	0.15125	0.99965	UP
XLOC_012631	PPM1H	12	62643981	62935037	3.85139	96.1916	4.64246	0.41555	0.99965	UP
XLOC_046656	HECW1	7	42954134	43566001	0.0207774	0.500525	4.59035	0.0257	0.75777	UP
XLOC_047578	EPHB6	7	142855060	142871094	0.173787	4.0071	4.52716	0.0009	0.0878315	UP
XLOC_028601	IL18R1,IL1RL1	2	102311501	102398775	0.0266883	0.615301	4.52702	0.00055	0.0644964	UP
XLOC_037447	KLF15	3	126342634	126357442	0.0701734	1.57086	4.48449	0.03435	0.876025	UP
XLOC_019894	CRISPLD2	16	84819983	84920768	4.03502	88.1295	4.44898	5e-05	0.0106919	UP
XLOC_045378	FKBP5	6	35573584	35728583	2.4892	53.4366	4.42408	5e-05	0.0106919	UP
XLOC_022633	VMO1	17	4785284	4786433	0.309483	6.40519	4.37131	0.0258	0.75777	UP
XLOC_024716	CXADRP3	18	14477954	14499278	0.0236153	0.465508	4.30102	0.226	0.99965	UP
XLOC_025199	TMPRSS9	19	2389770	2456996	0.024404	0.47985	4.29739	0.0973	0.99965	UP
XLOC_059952	LL0XNC01-116E7.2	X	103917410	103966712	0.0471499	0.915387	4.27905	0.4726	0.99965	UP
XLOC_012705	CPM	12	68808171	68971570	2.43666	46.5172	4.25479	0.00745	0.357526	UP
XLOC_052326	OLFML2A	9	124777157	124814885	0.23328	4.41662	4.2428	0.00035	0.0454406	UP
XLOC_014368	PCDH9	13	66302833	67230445	0.150883	2.79833	4.21306	0.00615	0.322842	UP
XLOC_023944	SECTM1	17	82321023	82334074	0.478858	8.51167	4.15177	0.00015	0.0253622	UP
XLOC_029656	ESPNL	2	238100156	238133287	0.0514886	0.891947	4.11463	0.02095	0.674203	UP
XLOC_033745	SPATA20P1	21	38121450	38307357	0.310575	5.34439	4.10501	0.301	0.99965	UP
XLOC_027921	DNAJC27-AS1	2	24943635	25039694	0.0282033	0.458716	4.02366	0.1485	0.99965	UP
XLOC_059701	OPHN1	X	68042343	68433913	2.10102	33.5509	3.99719	0.1317	0.99965	UP
XLOC_025616	CILP2	19	19538247	19546659	0.197504	3.15388	3.99718	0.00205	0.160264	UP
XLOC_000306	CDA	1	20588947	20618908	0.354403	5.5679	3.97367	0.0375	0.908812	UP
XLOC_026084	C5AR2	19	47332146	47347327	0.131347	2.01659	3.94046	0.002	0.158054	UP
XLOC_000318	ALPL	1	21509371	21578412	0.577487	8.84741	3.9374	0.0002	0.0319582	UP
XLOC_003107	CLSPN	1	35720217	35769967	0.0329697	0.499795	3.92213	0.0389	0.925769	UP
XLOC_022082	CACNA1G	17	50556206	50631940	0.0460085	0.684756	3.89562	5e-05	0.0106919	UP
XLOC_035024	SCUBE1	22	43197282	43343388	0.0732103	1.07903	3.88155	0.05705	0.99965	UP
XLOC_043548	BMP6	6	7726796	8102578	1.08294	15.9083	3.87674	0.20175	0.99965	UP
XLOC_026030	APOC1,APOE	19	44905753	44919349	0.678696	9.90275	3.86699	0.00015	0.0253622	UP
XLOC_014710	TMEM253	14	21016762	21104722	0.0789986	1.14846	3.86173	0.17475	0.99965	UP
XLOC_013512	RGCC	13	41457558	41470882	1.76367	25.5913	3.859	0.0017	0.141255	UP
XLOC_036151	CHST2	3	143119330	143131893	1.78906	25.6895	3.8439	5e-05	0.0106919	UP
XLOC_000981	IFI44L	1	78619921	78646145	0.314773	4.43858	3.81771	0.0018	0.147044	UP
XLOC_035191	PPARG	3	12287367	12434356	0.135754	1.89887	3.80608	0.00065	0.0700122	UP
XLOC_010514	SCARNA10	12	6491885	6531955	0.256948	3.58639	3.80298	0.45925	0.99965	UP
XLOC_020171	PPL	16	4882506	5097808	0.155811	2.13996	3.77972	0.0217	0.685956	UP
XLOC_047241	PRKAR2B	7	107044648	107161811	0.0397684	0.540463	3.7645	0.06675	0.99965	UP
XLOC_022567	RTN4RL1	17	1934676	2025345	0.146569	1.9837	3.75855	0.00645	0.326793	UP
XLOC_050476	PEBP4	8	22687658	23083619	0.0579501	0.783774	3.75755	0.32665	0.99965	UP
XLOC_006096	NANOS1	10	119029715	119080823	0.120686	1.62934	3.75497	0.38845	0.99965	UP
XLOC_040659	NKD2	5	1008828	1038943	0.179511	2.419	3.75226	0.03915	0.929535	UP
XLOC_041763	GRIA1	5	153489614	153813869	0.0984821	1.32513	3.75013	0.0006	0.0671123	UP
XLOC_012506	RP11-834C11.7	12	54058253	54125992	0.0755671	1.00236	3.7295	0.44505	0.99965	UP
XLOC_001844	FMO2	1	171185207	171227788	0.170339	2.24822	3.7223	0.0235	0.723969	UP
XLOC_031192	PDE1A	2	182140035	182523192	0.0972669	1.26868	3.70524	0.002	0.158054	UP
XLOC_052289	PTGS1	9	122370529	122395703	0.518215	6.73615	3.7003	0.00035	0.0454406	UP
XLOC_032092	WISP2	20	44656450	44810338	0.375921	4.70043	3.64429	0.0043	0.25403	UP
XLOC_052408	RP11-483H20.4	9	129608883	129642169	0.138949	1.73486	3.64219	0.43605	0.99965	UP
XLOC_012986	TMEM119	12	108589845	108598320	5.11117	63.0993	3.6259	5e-05	0.0106919	UP
XLOC_052518	LCNL1,PTGDS	9	136977504	136986410	4.36743	53.8991	3.6254	5e-05	0.0106919	UP
XLOC_019888	WFDC1	16	84294645	84329851	0.958682	11.7151	3.61118	0.0007	0.072705	UP
XLOC_023886	NPTX1	17	80467147	80477843	0.0596851	0.72877	3.61002	0.02135	0.679427	UP
XLOC_049009	RARRES2	7	150338316	150341674	0.424886	5.0821	3.58028	0.01985	0.653029	UP
XLOC_007964	RTN4RL2	11	57460548	57477534	0.0414805	0.494344	3.57501	0.15275	0.99965	UP
XLOC_010964	METTL7A	12	50923471	50932517	0.434319	5.10576	3.5553	0.00065	0.0700122	UP
XLOC_010581	RP11-20D14.6	12	8681599	8887001	0.046795	0.547719	3.54901	0.21295	0.99965	UP
XLOC_016376	STON2	14	81260655	81436465	0.0452644	0.529492	3.54816	0.01025	0.428291	UP
XLOC_028515	KCNIP3	2	95297303	95386083	0.401291	4.69041	3.54699	0.0005	0.0600868	UP
XLOC_053114	GAS1	9	86944362	86947189	9.93888	110.87	3.47964	5e-05	0.0106919	UP
XLOC_058905	RHOXF1-AS1	X	120036235	120245267	0.426741	4.70891	3.46396	0.02575	0.75777	UP
XLOC_029602	EFHD1	2	232547967	232682781	0.446298	4.8994	3.45653	0.0714	0.99965	UP
XLOC_017056	DISP2	15	40358234	40378639	0.0644865	0.691622	3.42291	0.0685	0.99965	UP
XLOC_035508	SLC38A3	3	50205245	50221486	0.110322	1.17277	3.41012	0.02105	0.674203	UP
XLOC_024939	MRO	18	50795119	50825402	0.0447823	0.475192	3.40751	0.02885	0.803655	UP
XLOC_000419	TRNP1	1	26993706	27000898	0.943029	9.83002	3.38182	0.00085	0.0846565	UP
XLOC_016041	Metazoa_SRP	14	49853615	49853914	3.15546	32.7271	3.37456	0.0127	0.491145	UP
XLOC_012336	SLC38A4	12	46383678	46876159	0.214381	2.19784	3.35784	0.00965	0.419123	UP
XLOC_000791	PODN	1	53062051	53085502	0.907162	9.24019	3.34849	0.00055	0.0644964	UP
XLOC_051983	IDNK	9	83623048	83644130	0.122437	1.23191	3.33078	0.09225	0.99965	UP
XLOC_047719	RP11-5C23.2	7	154928497	155003084	0.0823508	0.803842	3.28706	0.52165	0.99965	UP
XLOC_029081	AC007405.6	2	170771112	170778148	0.0855142	0.83399	3.28579	0.21585	0.99965	UP
XLOC_019046	SHISA9	16	12901619	13240413	0.222402	2.13183	3.26085	0.0025	0.179076	UP
XLOC_023587	SEPT4	17	58519836	58692055	0.308723	2.91452	3.23887	5e-05	0.0106919	UP
XLOC_014560	EFNB2	13	106489730	106535114	1.78044	16.7718	3.23573	5e-05	0.0106919	UP
XLOC_024096	IMPA2	18	11981024	12030883	2.4529	22.7698	3.21456	0.0002	0.0319582	UP
XLOC_039874	CXCL5	4	73995641	73998779	0.231545	2.14383	3.21082	0.0093	0.411037	UP
XLOC_002981	FAM46B	1	27005019	27012836	0.690703	6.37193	3.20559	0.00155	0.135774	UP
XLOC_053398	BRINP1	9	119153457	119369467	1.2739	11.7396	3.20406	0.00105	0.0997912	UP
XLOC_047071	AC002454.1	7	92604920	92917187	0.158786	1.46161	3.2024	0.2327	0.99965	UP
XLOC_037714	MME-AS1	3	155024123	155183729	0.510551	4.69734	3.20172	0.38335	0.99965	UP
XLOC_037118	ADAMTS9	3	64515653	65011468	0.0747346	0.687295	3.20108	0.03215	0.857712	UP
XLOC_043209	CCDC69	5	151181051	151270440	0.493707	4.50165	3.18873	0.05355	0.99965	UP
XLOC_026259	CTD-2224J9.8	19	53503391	53512687	0.0585931	0.531315	3.18076	0.20065	0.99965	UP
XLOC_001689	DUSP23	1	159780931	159782543	11.6541	105.192	3.17411	5e-05	0.0106919	UP
XLOC_027556	HAS1	19	51713111	51723994	6.27894	55.6208	3.14703	5e-05	0.0106919	UP
XLOC_026640	C3	19	6677703	6737603	2.75572	23.55	3.09522	5e-05	0.0106919	UP
XLOC_060180	MIR424,MIR503HG	X	134543336	134546721	0.427558	3.65118	3.09417	0.0505	0.99965	UP
XLOC_048051	KIAA0895	7	36324220	36453791	0.0631707	0.538821	3.09248	0.04325	0.984191	UP
XLOC_025150	CFD	19	859642	863630	0.367365	3.10759	3.08051	0.01585	0.566277	UP
XLOC_053094	FRMD3	9	83242989	83538546	0.060378	0.507615	3.07164	0.02015	0.65843	UP
XLOC_004566	KCNT2	1	196225778	196609225	0.10274	0.836282	3.02499	0.00635	0.325124	UP
XLOC_045580	COL21A1	6	56056589	56394094	0.132414	1.07752	3.02458	0.01075	0.44157	UP
XLOC_025142	PALM	19	709092	748330	0.373117	3.02569	3.01956	0.00225	0.172196	UP
XLOC_019615	MMP15	16	58025565	58046901	0.341381	2.75461	3.01239	0.006	0.318416	UP
XLOC_003933	U1	1	144560665	144560829	2.32366	18.6061	3.0013	0.2594	0.99965	UP
XLOC_004717	KCNH1	1	210678314	211134115	0.0863273	0.690194	2.99911	0.28895	0.99965	UP
XLOC_046554	PRR15	7	29563810	29567295	0.558829	4.45665	2.99548	0.0095	0.41734	UP
XLOC_042752	MCTP1	5	94152965	95284575	0.528339	4.20687	2.99321	0.00435	0.25403	UP
XLOC_011126	INHBE	12	57452322	57459280	0.197373	1.55179	2.97494	0.0394	0.93157	UP
XLOC_019561	CES1P1	16	55760547	55794158	0.0594147	0.467106	2.97486	0.0985	0.99965	UP
XLOC_022124	NOG	17	56593698	56595590	1.81131	14.0945	2.96002	0.00085	0.0846565	UP
XLOC_003897	HIST2H2BA	1	121087344	121117257	0.0720901	0.556856	2.94943	0.30405	0.99965	UP
XLOC_044112	SLC25A27	6	46652914	46735693	0.14444	1.11299	2.94589	0.0266	0.770327	UP
XLOC_025393	CTC-510F12.7	19	11199294	11262481	0.129973	1.00119	2.94544	0.496	0.99965	UP
XLOC_022239	SNHG25,SNORA50	17	64145969	64146476	0.74462	5.56385	2.90151	0.3028	0.99965	UP
XLOC_053165	ECM2	9	92297357	92670265	1.57481	11.7273	2.89662	0.03305	0.857712	UP
XLOC_008311	PLEKHB1	11	73646177	73662819	0.0689642	0.512913	2.8948	0.00385	0.236215	UP
XLOC_032807	KCNK15-AS1,LINC01260	20	44656450	44810338	0.101188	0.750611	2.89102	0.1354	0.99965	UP
XLOC_018668	PLIN1	15	89664364	89690783	0.0618103	0.45596	2.88299	0.2806	0.99965	UP
XLOC_029377	AC007879.7	2	207239649	207625928	0.170577	1.24432	2.86686	0.30815	0.99965	UP
XLOC_034163	BCRP3	22	24632914	24653356	0.0654504	0.474961	2.85933	0.05015	0.99965	UP
XLOC_027557	FPR1	19	51745171	51826189	2.64324	18.965	2.84296	0.003	0.198286	UP
XLOC_039503	SLC2A9	4	9771152	10054936	0.255843	1.8236	2.83346	0.0011	0.103864	UP
XLOC_038644	CXCL1	4	73869392	73871242	4.33263	30.784	2.82887	0.0006	0.0671123	UP
XLOC_018071	OIP5	15	41283989	41332621	0.0790539	0.556985	2.81673	0.3595	0.99965	UP
XLOC_036233	MME	3	155024123	155183729	15.4163	107.369	2.80004	5e-05	0.0106919	UP
XLOC_003715	COL11A1	1	102876466	103108496	13.1177	91.1296	2.7964	0.00025	0.0363525	UP
XLOC_019471	RP11-42I10.1	16	48623435	48744921	0.0853105	0.589086	2.78768	0.1863	0.99965	UP
XLOC_035219	RN7SL4P	3	15667235	15859771	0.650073	4.46568	2.78021	0.4665	0.99965	UP
XLOC_029415	RP11-105N14.1	2	213152969	213153659	0.0806189	0.551154	2.77327	0.30545	0.99965	UP
XLOC_045592	GUSBP4	6	57919783	57930291	0.166973	1.14057	2.77207	0.185	0.99965	UP
XLOC_019096	CTD-2576D5.4	16	17101768	17470881	0.0889343	0.606542	2.7698	0.4385	0.99965	UP
XLOC_035675	FTH1P23	3	72888072	73069199	0.11001	0.745719	2.761	0.4745	0.99965	UP
XLOC_059972	TSC22D3	X	107713220	107777342	16.8342	113.732	2.75616	5e-05	0.0106919	UP
XLOC_029642	ACKR3	2	236567786	236582358	0.584176	3.94483	2.75549	0.005	0.276445	UP
XLOC_042084	CTD-2012M11.3	5	3596053	3601403	0.19457	1.28802	2.72679	0.3532	0.99965	UP
XLOC_031528	TM4SF20	2	227362155	227381995	0.932044	6.15193	2.72257	0.00285	0.192753	UP
XLOC_039875	CXCL3	4	74036588	74038807	1.73802	11.3251	2.70402	0.00635	0.325124	UP
XLOC_029527	KCNE4	2	223051813	223198399	5.48054	35.2987	2.68723	5e-05	0.0106919	UP
XLOC_039146	RP11-290O12.2	4	154142121	154491716	0.315031	2.02229	2.68242	0.12925	0.99965	UP
XLOC_042322	RANBP3L	5	36248433	36302114	0.213955	1.36676	2.67538	0.04125	0.953603	UP
XLOC_033334	DSCR8,KCNJ15	21	38121450	38307357	0.520117	3.31668	2.67283	0.00065	0.0700122	UP
XLOC_050643	SFRP1	8	41261957	41309497	1.01477	6.45309	2.66884	0.0014	0.124892	UP
XLOC_029612	SCARNA5	2	233210050	233295674	0.378743	2.40167	2.66475	0.51	0.99965	UP
XLOC_003338	RP11-334A14.5	1	53062051	53085502	0.982331	6.19755	2.65742	0.2961	0.99965	UP
XLOC_012136	ST8SIA1	12	22046173	22437041	0.219082	1.37204	2.64678	0.0274	0.779694	UP
XLOC_037234	PROS1	3	93873032	93974066	2.59606	16.2306	2.64432	5e-05	0.0106919	UP
XLOC_000382	MAN1C1	1	25617467	25786207	0.103802	0.639326	2.62272	0.01705	0.594542	UP
XLOC_038642	CXCL6	4	73836496	73849064	2.44992	14.9598	2.61029	0.0006	0.0671123	UP
XLOC_029685	SNED1	2	240998837	241102332	2.39331	14.6127	2.61014	0.00975	0.419123	UP
XLOC_029543	COL4A3	2	227164564	227357836	0.148724	0.907793	2.60973	0.13255	0.99965	UP
XLOC_009846	KCNE3	11	74330317	74486051	0.226295	1.37813	2.60643	0.0979	0.99965	UP
XLOC_032387	SLC4A11	20	3227416	3239190	0.0747748	0.454003	2.60208	0.07455	0.99965	UP
XLOC_020751	CES1	16	55802850	55833337	0.759394	4.60393	2.59995	0.0017	0.141255	UP
XLOC_022988	AC010761.6	17	28719392	28743455	0.1531	0.9098	2.57108	0.38365	0.99965	UP
XLOC_012695	RP11-81H14.2	12	68332887	68451663	0.347173	2.06156	2.57001	0.0429	0.977757	UP
XLOC_039461	CYTL1	4	5014585	5019472	0.201895	1.19523	2.56561	0.0804	0.99965	UP
XLOC_016463	CLMN	14	95181939	95319906	0.299667	1.77197	2.56392	0.019	0.639535	UP
XLOC_023037	CTD-2349P21.7	17	30709298	30824776	0.976964	5.7728	2.56289	0.5348	0.99965	UP
XLOC_026717	COL5A3	19	9959560	10010471	0.820731	4.84905	2.56272	0.0008	0.0825021	UP
XLOC_010490	CCND2	12	4248764	4305350	0.247577	1.46249	2.56247	0.01065	0.439948	UP
XLOC_031228	SLC40A1	2	189560578	189583758	0.192487	1.13677	2.56211	0.0694	0.99965	UP
XLOC_049351	PTK2B	8	27311481	27459391	1.40081	8.23402	2.55533	0.0004	0.0505774	UP
XLOC_009565	PTGDR2	11	60835995	60855971	0.128088	0.751176	2.55202	0.5366	0.99965	UP
XLOC_036404	B3GNT5	3	183178042	183428778	0.233485	1.36484	2.54733	0.0264	0.767765	UP
XLOC_043433	RP11-443C10.1	5	179377504	179378865	0.0922349	0.538674	2.54603	0.29165	0.99965	UP
XLOC_040393	SFRP2	4	153780591	153789120	0.362253	2.11404	2.54493	0.0248	0.749723	UP
XLOC_002280	MARC1	1	220786758	220819657	0.725105	4.22624	2.54311	0.01955	0.650518	UP
XLOC_051320	LRRC6	8	132571952	132675617	0.163118	0.949628	2.54145	0.0252	0.753867	UP
XLOC_035140	LMCD1	3	7952804	8611924	28.9673	168.095	2.53678	0.0001	0.0191329	UP
XLOC_004637	FMOD	1	203340627	203351489	0.725639	4.18932	2.52939	0.0024	0.176255	UP
XLOC_053327	SVEP1	9	110365250	110579880	3.92146	22.6272	2.52859	5e-05	0.0106919	UP
XLOC_034471	FBLN1	22	45502237	45601135	46.1236	265.648	2.52594	0.00025	0.0363525	UP
XLOC_036119	RP11-319G6.1	3	139389814	139678017	0.105344	0.597827	2.50462	0.1187	0.99965	UP
XLOC_020230	SOCS1	16	11249618	11351762	0.757969	4.2975	2.50329	0.0204	0.663616	UP
XLOC_049022	ATG9B	7	150990994	151024499	0.108943	0.616624	2.50082	0.0617	0.99965	UP
XLOC_024960	CCDC68	18	54901508	54959508	1.30679	7.34101	2.48995	0.0026	0.182641	UP
XLOC_040861	NPR3	5	32689069	32791724	21.3299	119.006	2.48009	0.0003	0.0411538	UP
XLOC_043784	RN7SL471P	6	28977474	28977773	0.315546	1.73772	2.46128	0.3268	0.99965	UP
XLOC_018706	RGMA	15	93035272	93089204	0.132383	0.718277	2.43982	0.0162	0.574547	UP
XLOC_005631	TSPAN15	10	69451472	69507669	0.428805	2.31958	2.43547	0.02855	0.796824	UP
XLOC_044945	TUBB2B	6	3224260	3457022	0.797556	4.30544	2.4325	0.2519	0.99965	UP
XLOC_020449	SULT1A1	16	28605195	28623625	0.0878337	0.464288	2.40217	0.0451	0.99965	UP
XLOC_031464	RP11-33O4.1	2	219069353	219069809	0.291307	1.53587	2.39845	0.20905	0.99965	UP
XLOC_041593	KIF20A	5	138139765	138213343	0.122061	0.642542	2.39619	0.1568	0.99965	UP
XLOC_044437	AIM1	6	106511854	106570451	0.533136	2.80009	2.3929	0.0115	0.4594	UP
XLOC_003988	LINC01138	1	148362994	148460150	0.143377	0.748303	2.38381	0.1009	0.99965	UP
XLOC_004892	RNA5S9	1	228628147	228628266	49.1307	254.39	2.37234	0.20225	0.99965	UP
XLOC_039878	CXCL2	4	74097034	74099293	0.843328	4.35931	2.36993	0.0097	0.419123	UP
XLOC_031216	CALCRL	2	187001875	187565760	0.0838545	0.428926	2.35477	0.2117	0.99965	UP
XLOC_050463	HR	8	22114414	22133384	0.643515	3.28174	2.35042	0.0267	0.770327	UP
XLOC_038186	HTRA3	4	8269764	8307111	0.20957	1.05997	2.33852	0.0592	0.99965	UP
XLOC_003379	PPAP2B	1	56494746	56645301	30.8642	155.625	2.33407	0.0003	0.0411538	UP
XLOC_021758	RASL10B	17	35574794	35868891	1.412	7.0987	2.32981	0.26045	0.99965	UP
XLOC_009617	SNHG1,SNORD22,SNORD25,SNORD26,SNORD27,SNORD28,SNORD30	11	62851987	62855914	29.4171	147.889	2.32979	0.1205	0.99965	UP
XLOC_045293	VWA7	6	31739947	31777294	0.109147	0.547473	2.32651	0.3475	0.99965	UP
XLOC_025631	ZNF90	19	20077993	20321305	0.200581	1.0049	2.3248	0.12	0.99965	UP
XLOC_015463	SERPINA3,SERPINA4,SERPINA5	14	94561090	94624646	0.837024	4.1648	2.3149	0.0032	0.210548	UP
XLOC_042944	ZNF608	5	124636912	124748807	0.183681	0.913626	2.3144	0.0254	0.755127	UP
XLOC_045322	HLA-DRB1	6	32552712	32589848	0.158972	0.785618	2.30506	0.07745	0.99965	UP
XLOC_015407	FOXN3-AS1	14	89124870	89954777	0.27826	1.37237	2.30217	0.4794	0.99965	UP
XLOC_041705	STK32A	5	147234962	147387852	0.186802	0.920699	2.30122	0.0704	0.99965	UP
XLOC_021859	RP5-1028K7.2	17	40517025	40527002	0.0996371	0.490945	2.30081	0.1982	0.99965	UP
XLOC_007516	SNORA23	11	9384621	9448126	1.42531	7.02049	2.3003	0.48605	0.99965	UP
XLOC_022874	MFAP4	17	19337553	19387240	4.82618	23.756	2.29934	0.0103	0.429147	UP
XLOC_026946	CTC-559E9.5	19	19757365	19834927	0.223819	1.10083	2.29818	0.37455	0.99965	UP
XLOC_029444	IGFBP2	2	216632827	216664436	99.3624	488.409	2.29732	0.00035	0.0454406	UP
XLOC_033330	AP001432.14,DSCR9	21	37208502	37268497	0.11713	0.575084	2.29566	0.20205	0.99965	UP
XLOC_044026	DAAM2	6	39792365	39934551	2.48259	12.1586	2.29206	0.0016	0.139315	UP
XLOC_050165	PSCA	8	142657459	142682724	0.123914	0.604331	2.286	0.25625	0.99965	UP
XLOC_011598	RP11-545P7.9	12	113195440	113298585	0.102781	0.498703	2.27861	0.4985	0.99965	UP
XLOC_006930	ACTA2	10	88879733	89015785	116.235	563.37	2.27704	0.0009	0.0878315	UP
XLOC_042616	RP11-466P24.2	5	76081945	76353939	0.109437	0.529982	2.27585	0.36435	0.99965	UP
XLOC_052349	GARNL3	9	127224264	127393660	0.156428	0.757438	2.27563	0.00765	0.363525	UP
XLOC_039541	RP11-665G4.1	4	15002673	15446166	0.113874	0.550713	2.27386	0.42785	0.99965	UP
XLOC_048147	FTLP15	7	45990904	46000898	0.115416	0.55798	2.27337	0.4033	0.99965	UP
XLOC_001560	BX470102.3	1	153533602	153536244	0.231464	1.11891	2.27324	0.4536	0.99965	UP
XLOC_047344	AC000123.4	7	127346789	127431924	0.120701	0.582602	2.27107	0.53535	0.99965	UP
XLOC_014162	LINC01048	13	37481466	37484769	0.12244	0.590748	2.27047	0.35525	0.99965	UP
XLOC_010979	ACVRL1	12	51906907	51923361	0.396256	1.91177	2.2704	0.0174	0.599558	UP
XLOC_024465	CCDC102B	18	68673687	69055189	0.205576	0.990577	2.2686	0.06695	0.99965	UP
XLOC_023050	RP11-848P1.5	17	31008496	31382116	0.129664	0.623914	2.26657	0.49255	0.99965	UP
XLOC_028417	RP11-301O19.1	2	86143931	86196049	0.143673	0.689206	2.26215	0.5092	0.99965	UP
XLOC_040384	TMEM154	4	152618631	152680165	0.132931	0.634349	2.25459	0.1644	0.99965	UP
XLOC_059982	CTD-2328D6.1	X	109054130	109054590	3906.45	18564.6	2.24863	0.05605	0.99965	UP
XLOC_008950	CDKN1C	11	2883212	2885881	0.702316	3.32588	2.24355	0.02405	0.736234	UP
XLOC_016042	RN7SL2	14	49862546	49862849	225.231	1066.08	2.24284	0.02405	0.736234	UP
XLOC_015853	ZFHX2	14	23511759	23578800	0.175324	0.826322	2.23668	0.1756	0.99965	UP
XLOC_028771	TMEM37	2	119429900	119438520	0.268327	1.26357	2.23544	0.07915	0.99965	UP
XLOC_032795	JPH2	20	44111694	44187578	0.339599	1.58741	2.22478	0.01475	0.538894	UP
XLOC_019217	IL21R	16	27402161	27453393	0.196042	0.909554	2.214	0.1334	0.99965	UP
XLOC_010929	TROAP	12	49292630	49331731	0.101507	0.470639	2.21304	0.0173	0.598951	UP
XLOC_052402	LINC01503	9	129332299	129359538	2.16221	9.99932	2.20932	0.01885	0.638923	UP
XLOC_058216	TAB3-AS2	X	30827441	30975084	0.665074	3.04079	2.19286	0.5473	0.99965	UP
XLOC_032027	VSTM2L	20	37903103	37945350	0.687083	3.13634	2.19053	0.01225	0.481425	UP
XLOC_051724	RP11-613M10.6	9	37509149	37510299	0.680695	3.10718	2.19052	0.235	0.99965	UP
XLOC_023733	ABCA8	17	68867291	69061064	0.478793	2.18075	2.18735	0.00435	0.25403	UP
XLOC_015044	AL139099.2,RN7SL1	14	49570983	49614672	314.914	1431.4	2.1844	0.1078	0.99965	UP
XLOC_048989	RNY1	7	148987135	148987248	166.964	757.306	2.18134	0.1394	0.99965	UP
XLOC_009341	TP53I11	11	44719391	44951306	22.377	101.474	2.18102	0.0003	0.0411538	UP
XLOC_030667	SH3RF3-AS1	2	109127326	109128930	0.616964	2.79605	2.18013	0.03925	0.929535	UP
XLOC_048386	CTB-51J22.1	7	74027788	74069907	0.346358	1.56234	2.17337	0.5251	0.99965	UP
XLOC_022152	BZRAP1-AS1	17	58301227	58417595	0.107828	0.485902	2.17194	0.09565	0.99965	UP
XLOC_006981	PLCE1-AS1	10	93993988	94332823	1.25883	5.66763	2.17067	0.2515	0.99965	UP
XLOC_000894	DNAJC6	1	65248218	65416006	1.4517	6.52401	2.16802	0.0036	0.227598	UP
XLOC_039470	RP11-539L10.3	4	6670724	6676047	0.175935	0.786486	2.16038	0.53525	0.99965	UP
XLOC_042972	FBN2	5	128257908	129033642	2.98028	13.2643	2.15402	5e-05	0.0106919	UP
XLOC_011936	SCNN1A	12	6346842	6391571	0.322383	1.43061	2.14978	0.0911	0.99965	UP
XLOC_023828	CYGB	17	76527355	76557683	3.63651	16.1267	2.14882	0.00705	0.342856	UP
XLOC_060164	GPC4	X	133300102	133415490	14.3208	63.3044	2.14419	0.00045	0.0545288	UP
XLOC_047123	BHLHA15	7	98211426	98212979	0.134112	0.591733	2.14151	0.20135	0.99965	UP
XLOC_026900	CTD-3131K8.2	19	17468768	17521288	0.144432	0.636292	2.1393	0.5208	0.99965	UP
XLOC_008423	RP11-320L11.2	11	86283926	86284668	0.146683	0.646022	2.13888	0.24015	0.99965	UP
XLOC_051882	RP11-12A20.7	9	67725689	67726544	0.172777	0.758073	2.13343	0.24595	0.99965	UP
XLOC_046213	RP11-52J3.2	6	157700386	157945077	0.189436	0.829213	2.13003	0.4893	0.99965	UP
XLOC_007786	TSPAN18	11	44719391	44951306	3.43707	14.8486	2.11108	0.08745	0.99965	UP
XLOC_002220	DTL	1	212035552	212107400	0.162992	0.703864	2.11049	0.08515	0.99965	UP
XLOC_018366	RP11-16E23.5	15	65611365	65891991	0.281865	1.21646	2.10961	0.49515	0.99965	UP
XLOC_015544	MEG8,MEG8_1,MEG8_2,SNORD112	14	100894769	100935999	0.542844	2.32203	2.09678	0.222	0.99965	UP
XLOC_051227	ENPP2	8	119557085	119673453	11.0597	47.0715	2.08954	0.00025	0.0363525	UP
XLOC_031526	COL4A4	2	227002710	227164113	0.551506	2.34197	2.08627	0.00295	0.19677	UP
XLOC_004926	FAM89A	1	231018957	231040246	3.30014	13.8564	2.06995	0.00415	0.248334	UP
XLOC_031371	FZD5	2	207762585	207769563	0.749137	3.13907	2.06704	0.00635	0.325124	UP
XLOC_017239	C15orf65	15	55202965	55508234	0.289365	1.21086	2.06507	0.4253	0.99965	UP
XLOC_001209	GSTM5	1	109712254	109775428	0.155393	0.648707	2.06164	0.24125	0.99965	UP
XLOC_029963	AC097724.3	2	28708952	28736205	0.132002	0.550759	2.06087	0.28145	0.99965	UP
XLOC_028670	SH3RF3	2	109129347	109504632	1.73132	7.19409	2.05494	0.0004	0.0505774	UP
XLOC_040111	RBMXP4,SEC24B-AS1	4	109346325	109540896	0.120041	0.49789	2.0523	0.22405	0.99965	UP
XLOC_046545	JAZF1-AS1	7	27733063	28243917	0.134844	0.559243	2.05219	0.4211	0.99965	UP
XLOC_023558	TMEM100	17	55719626	55732121	0.106886	0.443211	2.05192	0.0927	0.99965	UP
XLOC_040194	TMEM155	4	121758932	121766814	3.84251	15.9244	2.05112	0.00255	0.180876	UP
XLOC_049161	CLDN23	8	8701937	8704106	0.126554	0.524029	2.0499	0.13035	0.99965	UP
XLOC_035953	CSTA	3	122325243	122341972	0.64992	2.68657	2.04743	0.08	0.99965	UP
XLOC_001272	OLFML3	1	113979390	113982254	51.8014	213.416	2.04261	0.00025	0.0363525	UP
XLOC_009886	RP11-111M22.3	11	76441337	76444656	0.329527	1.35127	2.03585	0.2078	0.99965	UP
XLOC_002604	RP11-206L10.8	1	778769	819837	0.119676	0.490093	2.03393	0.59725	0.99965	UP
XLOC_021195	SERPINF1	17	1761958	1777574	5.9192	24.1538	2.02877	0.00405	0.244361	UP
XLOC_004054	SELENBP1	1	151364301	151372733	2.57184	10.4904	2.0282	0.00285	0.192753	UP
XLOC_009876	RP11-535A19.1,RP11-535A19.2	11	75758454	76143195	0.49952	2.02656	2.02042	0.3088	0.99965	UP
XLOC_020690	ZNF423	16	49487523	49857919	0.5328	2.16133	2.02025	0.05055	0.99965	UP
XLOC_004484	GLUL	1	182381703	182392206	33.7367	136.73	2.01893	0.00205	0.160264	UP
XLOC_030608	TBC1D8	2	100820151	101270316	0.546461	2.1931	2.00478	0.19375	0.99965	UP
XLOC_042374	SEPP1	5	42756800	42887392	0.17172	0.686924	2.00009	0.02755	0.782431	UP
XLOC_018003	ACTC1	15	34755083	34812923	0.108878	0.433329	1.99275	0.24335	0.99965	UP
XLOC_004689	FAIM3	1	206904385	206923247	0.229314	0.912208	1.99204	0.055	0.99965	UP
XLOC_041815	ADRA1B	5	159916782	159972544	0.645	2.5596	1.98855	0.03685	0.897547	UP
XLOC_016153	RP11-47I22.2	14	61187558	61658696	0.135746	0.538045	1.98682	0.626	0.99965	UP
XLOC_052078	RP11-2B6.3	9	94166288	94204568	1.15554	4.56211	1.98113	0.2631	0.99965	UP
XLOC_038471	USP46-AS1	4	52659405	52661668	0.191593	0.755638	1.97965	0.2047	0.99965	UP
XLOC_008175	RP11-867G23.10	11	66409157	66417137	0.179379	0.706276	1.97722	0.2424	0.99965	UP
XLOC_034848	PISD	22	31399522	31662432	11.2642	44.1965	1.97219	0.0272	0.777044	UP
XLOC_022882	SLC47A2	17	19678287	19718979	0.112229	0.439321	1.96883	0.0914	0.99965	UP
XLOC_011134	SLC26A10	12	57610179	57633355	0.403396	1.57672	1.96665	0.15655	0.99965	UP
XLOC_050016	RP11-760H22.2	8	120052179	120056201	0.521497	2.03331	1.9631	0.20085	0.99965	UP
XLOC_052570	VLDLR-AS1	9	2422701	2660053	0.646607	2.51442	1.95927	0.2268	0.99965	UP
XLOC_014188	FOXO1	13	40555666	40666597	1.25907	4.89566	1.95914	0.0055	0.299534	UP
XLOC_029539	RP11-395N3.2	2	226800145	226811029	0.20212	0.784953	1.95739	0.3799	0.99965	UP
XLOC_008340	SNORD15B	11	75399485	75422280	9.19715	35.7146	1.95725	0.50785	0.99965	UP
XLOC_025391	CTC-510F12.2	19	11199294	11262481	0.209642	0.813285	1.95583	0.5734	0.99965	UP
XLOC_046980	SRRM3	7	76201899	76287288	0.212943	0.825265	1.95439	0.0645	0.99965	UP
XLOC_035310	CMTM8	3	32238678	32370325	0.544847	2.11123	1.95416	0.06745	0.99965	UP
XLOC_016114	RP11-1085N6.3	14	56488353	56730535	0.115102	0.445217	1.9516	0.5374	0.99965	UP
XLOC_051183	ANGPT1	8	107249481	107498055	23.3502	90.1491	1.94888	0.00035	0.0454406	UP
XLOC_026556	TLE2	19	2997637	3047635	1.64244	6.33785	1.94815	0.0039	0.238277	UP
XLOC_026078	NPAS1	19	47019819	47045775	2.65362	10.2292	1.94666	0.0156	0.560098	UP
XLOC_031802	MACROD2	20	13849246	16053197	0.179883	0.692956	1.94571	0.12905	0.99965	UP
XLOC_050078	RP11-103H7.5	8	126552441	126713415	0.132835	0.511197	1.94424	0.45275	0.99965	UP
XLOC_024633	RP11-888D10.3	18	9315193	9334441	0.140801	0.540633	1.941	0.40845	0.99965	UP
XLOC_012192	RP11-874G11.1	12	28133248	28581511	0.141747	0.544134	1.94064	0.5561	0.99965	UP
XLOC_025882	KCNK6	19	38319843	38332076	2.10425	8.04893	1.93549	0.0021	0.163295	UP
XLOC_023811	TRIM47	17	75874160	75879546	1.14374	4.37145	1.93435	0.03495	0.882036	UP
XLOC_052009	DAPK1	9	87497227	87708633	3.7528	14.3284	1.93284	0.0004	0.0505774	UP
XLOC_033746	LINC01423	21	38323634	38333421	0.328681	1.25371	1.93144	0.2637	0.99965	UP
XLOC_014514	GAPDHP22	13	99190578	99190991	0.170986	0.650997	1.92878	0.40845	0.99965	UP
XLOC_031924	ID1	20	31605282	31606515	10.028	38.1473	1.92755	0.00235	0.175238	UP
XLOC_008171	RP11-867G23.8	11	66347949	66372214	0.443037	1.68016	1.9231	0.41245	0.99965	UP
XLOC_005755	PLAC9	10	80131681	80145359	7.57823	28.6622	1.91922	0.008	0.375252	UP
XLOC_050091	FKSG59	8	128118010	128118385	0.201992	0.762558	1.91655	0.4085	0.99965	UP
XLOC_032510	SNORD17	20	17941596	18059188	3.9467	14.8674	1.91343	0.5752	0.99965	UP
XLOC_006071	ATRNL1	10	115093364	115948992	0.116357	0.438264	1.91324	0.13845	0.99965	UP
XLOC_020811	CDH8	16	61647241	62037035	0.144269	0.5422	1.91006	0.1452	0.99965	UP
XLOC_028919	HNMT	2	137964019	138016364	3.71692	13.9511	1.9082	0.0292	0.808757	UP
XLOC_018333	DAPK2	15	63907035	64072033	0.751683	2.8097	1.90222	0.0583	0.99965	UP
XLOC_027767	SNTG2	2	950867	1367613	0.168351	0.629167	1.90197	0.11715	0.99965	UP
XLOC_021986	MAPT	17	45843650	46028334	0.134134	0.500927	1.90093	0.15945	0.99965	UP
XLOC_050217	CTD-2517M22.17	8	144511287	144517845	0.24513	0.915065	1.90033	0.5597	0.99965	UP
XLOC_043100	CD14	5	140631727	140633701	1.21293	4.5259	1.8997	0.0244	0.743816	UP
XLOC_006186	RP11-45A17.2	10	131966454	131981931	0.253907	0.945708	1.8971	0.53795	0.99965	UP
XLOC_002852	RP11-108M9.4	1	16740272	16972979	0.882176	3.28431	1.89645	0.35805	0.99965	UP
XLOC_034726	GSTT2B	22	23957413	23961186	0.52119	1.94026	1.89637	0.1282	0.99965	UP
XLOC_014577	IRS2	13	109752697	109808252	3.57726	13.2812	1.89246	0.00045	0.0545288	UP
XLOC_006721	DNAJC12	10	67796664	67838166	0.298176	1.10591	1.891	0.10315	0.99965	UP
XLOC_004559	B3GALT2	1	193122016	193253901	1.35934	5.02291	1.88561	0.2026	0.99965	UP
XLOC_039121	FAM160A1	4	151409215	151663632	0.127445	0.470864	1.88543	0.08075	0.99965	UP
XLOC_025018	BCL2	18	63123345	63320128	0.175622	0.648841	1.88539	0.05005	0.99965	UP
XLOC_026926	COMP	19	18782772	18791314	17.3252	63.9492	1.88406	0.00025	0.0363525	UP
XLOC_052820	RMRP	9	35657750	35658018	42.2718	155.738	1.88135	0.01145	0.458662	UP
XLOC_033424	LL21NC02-1C16.2	21	44932813	44939913	1.91229	7.03322	1.87888	0.23135	0.99965	UP
XLOC_046537	HOXA11-AS,HOXA11-AS1_1,HOXA11-AS1_2,HOXA11-AS1_3,HOXA11-AS1_4,HOXA11-AS1_5,HOXA11-AS1_6	7	27181509	27193448	0.406121	1.4904	1.87572	0.1906	0.99965	UP
XLOC_003087	RN7SKP16	1	33306765	33431052	0.315955	1.15936	1.87554	0.53045	0.99965	UP
XLOC_017348	RNU5B-1	15	65304676	65304792	31.7494	116.409	1.8744	0.3984	0.99965	UP
XLOC_050909	ZFHX4-AS1	8	76403997	76867285	2.62609	9.59074	1.86873	0.37445	0.99965	UP
XLOC_022990	AC010761.10	17	28743983	28750958	2.07458	7.56742	1.86698	0.60415	0.99965	UP
XLOC_030030	CYP1B1	2	37923186	38239590	67.733	246.783	1.86531	0.0108	0.442374	UP
XLOC_033302	LINC01426	21	34745756	34784886	0.205587	0.744602	1.85672	0.10025	0.99965	UP
XLOC_001692	RP11-190A12.8	1	159826749	159900163	0.223914	0.803229	1.84287	0.4426	0.99965	UP
XLOC_012714	LINC01481	12	69738680	70354993	0.235696	0.844527	1.84122	0.3838	0.99965	UP
XLOC_037624	SLC9A9	3	143265221	143848531	0.33165	1.18306	1.83479	0.11115	0.99965	UP
XLOC_020115	PKMYT1	16	2963943	2980539	0.165168	0.587752	1.83127	0.06035	0.99965	UP
XLOC_028628	POU3F3	2	104853284	104926052	0.202652	0.720616	1.83022	0.08925	0.99965	UP
XLOC_025140	FSTL3	19	676364	683390	19.6404	69.7853	1.8291	0.00015	0.0253622	UP
XLOC_018199	USP50	15	50424379	50546708	0.138516	0.491233	1.82636	0.27605	0.99965	UP
XLOC_032085	GDAP1L1	20	44247098	44280917	0.119356	0.422878	1.82497	0.1284	0.99965	UP
XLOC_023730	FAM20A	17	68259181	68763882	2.70423	9.5582	1.82152	0.1519	0.99965	UP
XLOC_058766	TCEAL4	X	103576230	103587736	36.9673	130.605	1.82089	0.0003	0.0411538	UP
XLOC_012544	MMP19	12	55743279	55842966	2.41098	8.50087	1.81799	0.247	0.99965	UP
XLOC_029393	MAP2	2	209424057	209734118	0.33337	1.16892	1.80998	0.0225	0.705113	UP
XLOC_013452	FRY	13	32025313	32299122	0.522458	1.81873	1.79954	0.0403	0.943643	UP
XLOC_051703	LINC00961	9	35909482	35911686	0.1753	0.60828	1.79491	0.2086	0.99965	UP
XLOC_022562	TLCD2	17	1702789	1710438	0.625907	2.15691	1.78494	0.0272	0.777044	UP
XLOC_050111	WISP1	8	133191038	133230344	3.0162	10.388	1.78411	0.00245	0.177241	UP
XLOC_033488	CH507-513H4.5	21	8254591	8255514	0.558069	1.92144	1.78367	0.1199	0.99965	UP
XLOC_001608	MTX1P1	1	155230974	155234325	0.12573	0.432001	1.7807	0.35285	0.99965	UP
XLOC_047910	TWIST1	7	19020990	19117672	7.11211	24.4168	1.77952	0.01275	0.491771	UP
XLOC_052421	ASS1	9	130444928	130501274	21.0415	72.1242	1.77725	0.0003	0.0411538	UP
XLOC_049580	RGS20	8	53851807	53959303	0.506295	1.73471	1.77665	0.07875	0.99965	UP
XLOC_020792	RP11-481J2.3	16	58295079	58406144	0.172779	0.589615	1.77084	0.4556	0.99965	UP
XLOC_006973	RBP4	10	93566664	93604480	4.15166	14.1454	1.76857	0.0298	0.820508	UP
XLOC_050064	KIAA0196-AS1	8	125024259	125367120	0.20068	0.682082	1.76505	0.56665	0.99965	UP
XLOC_017795	RP11-173D3.1	15	20128744	20147953	0.208093	0.706524	1.76351	0.34955	0.99965	UP
XLOC_010705	PDE3A	12	20361731	20684381	0.347372	1.17664	1.76011	0.0415	0.95786	UP
XLOC_005488	PTPN20	10	46911395	47002488	0.311352	1.05454	1.76	0.01175	0.46555	UP
XLOC_020410	RP11-266L9.8	16	25085591	25111555	0.229577	0.777067	1.75906	0.37885	0.99965	UP
XLOC_003951	ITGA10	1	145891207	145910189	4.87322	16.439	1.75418	0.0043	0.25403	UP
XLOC_047482	TBXAS1	7	139561569	140020325	1.08487	3.65584	1.75269	0.1568	0.99965	UP
XLOC_016306	RP11-950C14.3	14	75002910	75012851	0.261556	0.881265	1.75246	0.58485	0.99965	UP
XLOC_021668	CTD-2349P21.9	17	30709298	30824776	0.285405	0.95837	1.74757	0.59495	0.99965	UP
XLOC_019831	WWOX	16	78099412	79212667	1.50851	5.06255	1.74675	0.09215	0.99965	UP
XLOC_018030	RP11-624L4.1	15	38865321	39427195	1.25193	4.19836	1.74567	0.1756	0.99965	UP
XLOC_009890	LRRC32	11	76657055	76670747	3.94079	13.2033	1.74434	0.0025	0.179076	UP
XLOC_027133	SBSN	19	35523366	35528351	0.432411	1.44187	1.73747	0.15115	0.99965	UP
XLOC_023215	GJD3	17	40360654	40364693	0.470049	1.55924	1.72996	0.1144	0.99965	UP
XLOC_002205	RP11-75I2.3	1	210678314	211134115	0.30597	1.01215	1.72596	0.11665	0.99965	UP
XLOC_023995	EMILIN2	18	2847029	2915993	1.07878	3.56849	1.72591	0.06915	0.99965	UP
XLOC_031222	DIRC1	2	188598790	188839445	0.145509	0.478153	1.71636	0.2759	0.99965	UP
XLOC_013371	TNFRSF19	13	23570369	23676104	2.83808	9.2822	1.70955	0.0035	0.223217	UP
XLOC_052406	RP11-492E3.2	9	129575408	129584556	0.129538	0.423303	1.70831	0.22235	0.99965	UP
XLOC_021885	KLHL10	17	41825180	41848384	0.166587	0.542059	1.70217	0.381	0.99965	UP
XLOC_053355	ZNF883	9	112997119	113056759	0.215851	0.702334	1.70212	0.40585	0.99965	UP
XLOC_010181	CRYAB	11	111908564	111926872	79.878	259.787	1.70146	0.00175	0.144584	UP
XLOC_031469	GLB1L	2	219229756	219278170	1.35483	4.40342	1.70051	0.1567	0.99965	UP
XLOC_045658	OOEP	6	73368554	73452276	0.152611	0.494962	1.69746	0.5712	0.99965	UP
XLOC_014436	SLITRK1	13	83877204	83882393	0.235509	0.7635	1.69685	0.07695	0.99965	UP
XLOC_003746	SORT1	1	109309567	109397951	26.3989	85.5739	1.69669	0.0066	0.329796	UP
XLOC_032713	RPL36P4	20	35542020	35557634	0.554188	1.79529	1.69577	0.54115	0.99965	UP
XLOC_008648	NNMT	11	114059592	114356571	272.896	881.938	1.69233	0.0098	0.419123	UP
XLOC_022339	TTYH2	17	74213513	74262020	0.418161	1.35011	1.69095	0.1285	0.99965	UP
XLOC_059530	CFP	X	47624212	47630305	0.164432	0.530238	1.68915	0.26265	0.99965	UP
XLOC_033045	CH507-42P11.8	21	6111133	6123739	0.297853	0.959153	1.68716	0.07075	0.99965	UP
XLOC_035557	ITIH3	3	52794767	52809009	0.207751	0.667203	1.68327	0.1912	0.99965	UP
XLOC_001420	RP11-433J22.2	1	147756198	147773362	0.454746	1.45888	1.68173	0.5851	0.99965	UP
XLOC_043195	CD74	5	150401636	150412929	0.590831	1.89523	1.68155	0.05935	0.99965	UP
XLOC_059065	CDR1-AS	X	140782404	140784871	1.1851	3.77567	1.67172	0.0682	0.99965	UP
XLOC_019985	VPS9D1-AS1	16	89707133	89816657	0.287605	0.913925	1.66799	0.52055	0.99965	UP
XLOC_059991	CHRDL1	X	110673855	110795819	1.09039	3.4471	1.66053	0.02735	0.779694	UP
XLOC_000980	PTGFR	1	78229598	78539749	1.47414	4.65211	1.65801	0.0133	0.507599	UP
XLOC_049099	KBTBD11	8	1971396	2006936	0.400278	1.26298	1.65775	0.0362	0.891341	UP
XLOC_040922	PTGER4	5	40679497	40693735	0.717935	2.26421	1.65708	0.04055	0.946097	UP
XLOC_018115	CATSPER2	15	43628502	43684339	0.445796	1.40577	1.65691	0.2812	0.99965	UP
XLOC_000134	RP3-510D11.2	1	9182006	9202619	0.257912	0.812884	1.65617	0.30115	0.99965	UP
XLOC_007783	CD82	11	44564426	44620363	18.6049	58.5078	1.65294	0.00455	0.261508	UP
XLOC_037496	PLXND1	3	129555174	129606818	32.8238	103.107	1.65133	0.00975	0.419123	UP
XLOC_022032	CALCOCO2	17	48830987	48866522	36.4133	114.307	1.65038	0.00405	0.244361	UP
XLOC_026217	FPR2	19	51745171	51826189	0.222195	0.696636	1.64858	0.41435	0.99965	UP
XLOC_041807	RP11-175K6.1,RP11-175K6.2	5	159100482	159117478	0.906846	2.84087	1.6474	0.24105	0.99965	UP
XLOC_022784	PMP22	17	15229776	15265707	13.3326	41.7088	1.6454	0.00135	0.121928	UP
XLOC_045424	MOCS1	6	39792365	39934551	5.09574	15.9293	1.64432	0.03195	0.855589	UP
XLOC_012833	DCN	12	91140483	91183123	341.652	1066	1.64161	0.0387	0.925554	UP
XLOC_044044	MDFI	6	41636881	41654246	0.255956	0.798264	1.64097	0.11415	0.99965	UP
XLOC_019257	AC009133.22,QPRT,SPN	16	29662978	29698699	0.692448	2.14556	1.63158	0.08995	0.99965	UP
XLOC_046427	AC004538.3	7	11180901	11832198	0.215292	0.666272	1.62982	0.10535	0.99965	UP
XLOC_003218	SLC6A9	1	43991358	44115913	5.42203	16.7742	1.62934	0.0045	0.259661	UP
XLOC_045451	CCND3	6	41934932	42050357	21.094	65.1251	1.62638	0.002	0.158054	UP
XLOC_031128	CHN1	2	174799362	175005369	2.07011	6.375	1.62272	0.01975	0.652693	UP
XLOC_035793	COL8A1	3	99638474	99799226	276.669	849.709	1.61881	0.0638	0.99965	UP
XLOC_015209	PPP1R36	14	64549901	64596536	0.308032	0.937256	1.60536	0.1246	0.99965	UP
XLOC_007168	EMX2OS	10	117425193	117549546	1.54302	4.69305	1.60476	0.0817	0.99965	UP
XLOC_014143	DCLK1	13	35768651	36131306	0.234823	0.712509	1.60133	0.0919	0.99965	UP
XLOC_025842	WDR62	19	36054880	36105106	0.151578	0.458658	1.59735	0.36515	0.99965	UP
XLOC_043594	CD83	6	14117255	14136918	0.201618	0.607792	1.59195	0.15545	0.99965	UP
XLOC_034633	CLTCL1	22	19179472	19291716	3.26696	9.83249	1.58961	0.00635	0.325124	UP
XLOC_022443	CBX2	17	79778131	79787983	0.662473	1.99291	1.58894	0.2058	0.99965	UP
XLOC_007612	TMEM86A	11	18693121	18792721	0.450449	1.35272	1.58642	0.2138	0.99965	UP
XLOC_018465	CYP11A1	15	74337758	74371211	0.552846	1.65644	1.58313	0.061	0.99965	UP
XLOC_002923	ID3	1	23557917	23559794	79.362	237.097	1.57895	0.0048	0.269486	UP
XLOC_038952	PP12613	4	121758932	121766814	0.286565	0.854508	1.57623	0.3545	0.99965	UP
XLOC_032879	KCNB1	20	49363876	49482647	0.238654	0.711582	1.57611	0.0498	0.99965	UP
XLOC_010284	C1QTNF5,MFRP	11	119338933	119346673	8.74837	26.0794	1.57582	0.01375	0.515306	UP
XLOC_003262	PIK3R3,RP11-322N21.2,RP4-533D7.6	1	46040139	46185958	0.915137	2.72575	1.57459	0.0409	0.949687	UP
XLOC_002611	HES4	1	998961	1000172	0.416633	1.24034	1.57389	0.19415	0.99965	UP
XLOC_017632	ACAN	15	88803442	88875354	1.51602	4.50652	1.57173	0.02555	0.755127	UP
XLOC_014586	RAB20	13	110523065	110561733	0.843695	2.50784	1.57165	0.0922	0.99965	UP
XLOC_026817	CTC-548K16.5	19	14380500	14408725	1.42829	4.23853	1.56928	0.6205	0.99965	UP
XLOC_031137	HOXD-AS2	2	176121610	176173102	0.610649	1.80227	1.5614	0.54995	0.99965	UP
XLOC_021973	FMNL1	17	45190930	45317040	1.95179	5.75566	1.56018	0.13115	0.99965	UP
XLOC_007818	NR1H3	11	47239301	47269032	2.651	7.8107	1.55892	0.0311	0.84327	UP
XLOC_030352	LBX2	2	74497516	74504678	0.289029	0.850629	1.55732	0.56405	0.99965	UP
XLOC_031240	AC006460.2	2	190646745	190708716	0.197408	0.580911	1.55713	0.55605	0.99965	UP
XLOC_000298	PLA2G5	1	20028178	20091190	0.806719	2.36992	1.5547	0.0867	0.99965	UP
XLOC_005247	PLXDC2	10	19816238	20289856	1.8938	5.55977	1.55374	0.0535	0.99965	UP
XLOC_023657	MARCH10	17	62699243	62808344	0.206803	0.60711	1.5537	0.26175	0.99965	UP
XLOC_015490	RP11-872J21.5	14	96500809	96567111	0.222732	0.653816	1.55358	0.61695	0.99965	UP
XLOC_053592	C9orf116	9	135495180	135506447	0.95796	2.80795	1.55148	0.4858	0.99965	UP
XLOC_031694	TRIB3	20	362834	397559	27.3318	80.1071	1.55135	0.0026	0.182641	UP
XLOC_000895	LEPR,LEPROT	1	65420586	65641559	43.9468	128.693	1.55011	0.01345	0.510442	UP
XLOC_028044	CYP1B1-AS1,RPL7P12	2	37923186	38239590	25.9611	76.0119	1.54987	0.3713	0.99965	UP
XLOC_019611	CTD-2600O9.2	16	57758216	57863053	0.168657	0.49358	1.54919	0.61325	0.99965	UP
XLOC_030815	RHOQP3	2	130212869	130213490	0.185686	0.54213	1.54577	0.4415	0.99965	UP
XLOC_020150	LINC01569	16	4245824	4253789	0.222834	0.650398	1.54535	0.23905	0.99965	UP
XLOC_052838	HMGB3P24	9	36190855	36304924	0.185376	0.540974	1.5451	0.5952	0.99965	UP
XLOC_014861	RP11-124D2.3	14	23356401	23365752	1.75672	5.12037	1.54336	0.6324	0.99965	UP
XLOC_036953	SLC26A6	3	48625722	48635493	10.5251	30.6661	1.54281	0.0116	0.462125	UP
XLOC_000459	SNORA73B	1	28505942	28539300	19.1013	55.5597	1.54037	0.40945	0.99965	UP
XLOC_021128	RP11-863P13.3	16	88177288	88178941	0.406132	1.18107	1.54007	0.1856	0.99965	UP
XLOC_048806	LRRC4	7	127652179	128092609	0.253821	0.737447	1.53873	0.49745	0.99965	UP
XLOC_041960	RGS14	5	177357836	177372601	0.211665	0.614253	1.53705	0.12155	0.99965	UP
XLOC_027697	ZNF582	19	56219669	56393545	0.771993	2.23427	1.53314	0.30495	0.99965	UP
XLOC_006777	RP11-442H21.2	10	72273919	72276036	41.6871	120.487	1.53121	0.06	0.99965	UP
XLOC_049380	CTD-2647L4.1	8	29067278	29263124	0.270774	0.780968	1.52817	0.58365	0.99965	UP
XLOC_024684	RP11-773H22.4	18	12947132	12991173	0.274309	0.790729	1.52738	0.62485	0.99965	UP
XLOC_044150	RN7SK	6	52995619	52995950	78.411	225.863	1.52632	0.0069	0.337821	UP
XLOC_002661	RP3-395M20.8	1	2549919	2565382	0.173606	0.499828	1.52562	0.39955	0.99965	UP
XLOC_022395	PRCD	17	76527355	76557683	0.431324	1.24085	1.52448	0.2379	0.99965	UP
XLOC_017512	RP11-762H8.1	15	78250501	78299924	0.149258	0.428823	1.52257	0.59455	0.99965	UP
XLOC_034352	GCAT	22	37807904	37817176	2.08958	6.00207	1.52225	0.0498	0.99965	UP
XLOC_036822	UBE2FP1	3	37052655	37183689	0.150316	0.431714	1.52208	0.59855	0.99965	UP
XLOC_027815	RRM2	2	10122327	10131419	1.04558	3.00131	1.52129	0.112	0.99965	UP
XLOC_039684	RP11-700J17.1	4	44622064	44726595	0.307187	0.88144	1.52075	0.61825	0.99965	UP
XLOC_000244	ARHGEF19-AS1	1	16197853	16212609	0.773588	2.21903	1.52029	0.6159	0.99965	UP
XLOC_026934	HAPLN4,TM6SF2	19	19254747	19273391	0.771364	2.20995	1.51853	0.2403	0.99965	UP
XLOC_043178	RP11-394O4.6	5	149406688	149428678	0.329964	0.94384	1.51623	0.63195	0.99965	UP
XLOC_001569	RP11-422P24.10	1	153959098	153977688	0.169619	0.484603	1.5145	0.5938	0.99965	UP
XLOC_027745	CTD-2619J13.23	19	58467044	58512413	0.173796	0.495916	1.5127	0.5958	0.99965	UP
XLOC_042001	RP11-1379J22.5	5	179657761	179664432	0.264834	0.755681	1.51269	0.34395	0.99965	UP
XLOC_040195	CCNA2	4	121801316	121823933	1.36492	3.88356	1.50856	0.17595	0.99965	UP
XLOC_025007	RP11-879F14.3	18	61571341	61579456	0.257566	0.732819	1.50852	0.36505	0.99965	UP
XLOC_009706	CD248	11	66312852	66319237	30.485	86.6914	1.50779	0.00605	0.319902	UP
XLOC_043432	ADAMTS2	5	179110850	179345430	26.9269	76.5283	1.50694	0.00895	0.400437	UP
XLOC_008891	RP11-326C3.16	11	215457	252984	0.385602	1.09449	1.50508	0.61855	0.99965	UP
XLOC_041291	RFESD	5	95646753	95698711	0.46859	1.32885	1.50379	0.32875	0.99965	UP
XLOC_027508	ASPDH	19	50511599	50514690	0.268691	0.76169	1.50325	0.323	0.99965	UP
XLOC_014876	DHRS4L1	14	24036452	24051028	0.198952	0.563376	1.50168	0.2707	0.99965	UP
XLOC_000689	MMACHC	1	45493865	45523047	1.09991	3.11287	1.50086	0.42965	0.99965	UP
XLOC_042890	CTD-2287O16.1	5	115962453	116060118	0.203937	0.577121	1.50075	0.3141	0.99965	UP
XLOC_017486	ISL2	15	76336723	76342476	0.296591	0.837724	1.498	0.2028	0.99965	UP
XLOC_053647	NSMF	9	137447569	137459334	17.8665	50.4601	1.49788	0.01075	0.44157	UP
XLOC_026741	CTC-215O4.4	19	10961000	11065395	0.211089	0.596104	1.49772	0.59015	0.99965	UP
XLOC_036252	RP11-550I24.2	3	157175222	157533619	0.579337	1.63047	1.49281	0.447	0.99965	UP
XLOC_050700	CEBPD	8	47736908	47739086	10.9819	30.822	1.48883	0.0063	0.325124	UP
XLOC_022801	CTC-529I10.1	17	15976559	16353656	0.255415	0.71339	1.48185	0.5869	0.99965	UP
XLOC_013173	RP11-338K17.8	12	123671112	123708403	0.271703	0.755668	1.47572	0.5931	0.99965	UP
XLOC_052237	SLC31A2	9	113150941	113221361	0.260949	0.725045	1.4743	0.6545	0.99965	UP
XLOC_023953	RP13-638C3.3	17	82519712	82648553	0.553847	1.5386	1.47406	0.6043	0.99965	UP
XLOC_007126	PDCD4-AS1	10	110869742	110919274	0.414167	1.14993	1.47326	0.6323	0.99965	UP
XLOC_050152	PTP4A3	8	141389938	141432454	0.839784	2.33152	1.47318	0.17945	0.99965	UP
XLOC_042987	AC034220.3	5	132184875	132395614	0.223589	0.619991	1.4714	0.4633	0.99965	UP
XLOC_023405	ARHGAP27	17	45393901	45434421	0.230836	0.639072	1.46911	0.14295	0.99965	UP
XLOC_038069	BDH1	3	197509782	197573323	0.495803	1.37171	1.46814	0.0786	0.99965	UP
XLOC_030434	ST3GAL5	2	85839143	85889014	10.2588	28.3511	1.46655	0.00355	0.225417	UP
XLOC_002197	HSD11B1	1	209661363	209734950	0.28591	0.788652	1.46383	0.45885	0.99965	UP
XLOC_008932	CTSD,IFITM10,RP11-295K3.1	11	1732409	1764025	317.452	874.06	1.46119	0.05595	0.99965	UP
XLOC_033805	SIK1	21	43414514	43427128	0.557835	1.53485	1.46019	0.10685	0.99965	UP
XLOC_018204	TNFAIP8L3	15	51037487	51338610	4.31348	11.8617	1.45939	0.01695	0.592476	UP
XLOC_025998	PINLYP	19	43543039	43596135	0.215887	0.592724	1.45708	0.41395	0.99965	UP
XLOC_043624	RNF144B	6	18387349	18468874	2.81638	7.72966	1.45656	0.1654	0.99965	UP
XLOC_028411	ATOH8	2	85751343	85788066	8.11487	22.2695	1.45643	0.0135	0.510442	UP
XLOC_033427	ADARB1	21	45070951	45226560	31.6782	86.809	1.45435	0.01235	0.484047	UP
XLOC_014530	RP11-12G12.7	13	100086030	100088848	0.791754	2.16922	1.45405	0.1828	0.99965	UP
XLOC_046357	AMZ1	7	2679521	2844324	0.244043	0.667278	1.45115	0.3035	0.99965	UP
XLOC_046509	FAM221A	7	23680129	23703249	0.212136	0.579214	1.44911	0.1791	0.99965	UP
XLOC_023877	TBC1D16	17	79932342	80035848	5.69953	15.5452	1.44755	0.00685	0.337647	UP
XLOC_009490	RN7SL605P	11	57528084	57528365	0.36304	0.989669	1.44682	0.5064	0.99965	UP
XLOC_003339	HIGD1AP11	1	53062051	53085502	0.366081	0.997597	1.44629	0.5956	0.99965	UP
XLOC_008325	RP11-702H23.6	11	74330317	74486051	0.476839	1.29831	1.44506	0.63515	0.99965	UP
XLOC_058310	CHST7	X	46573783	46598408	1.61191	4.37212	1.43956	0.06395	0.99965	UP
XLOC_020985	LDHD	16	75111859	75116771	0.211761	0.574059	1.43876	0.1634	0.99965	UP
XLOC_031509	SCG2	2	223596939	223602503	0.56097	1.51725	1.43546	0.0908	0.99965	UP
XLOC_016109	KTN1-AS1	14	55499277	55701526	0.788118	2.13048	1.43469	0.5261	0.99965	UP
XLOC_050015	DEPTOR	8	119867418	120050913	1.62435	4.3905	1.43452	0.0411	0.951648	UP
XLOC_008430	PRSS23	11	86791058	86955391	77.9045	209.618	1.42798	0.0861	0.99965	UP
XLOC_002126	SOX13	1	204073114	204127743	0.922349	2.4812	1.42765	0.03825	0.922933	UP
XLOC_011878	NINJ2	12	564295	663779	0.336879	0.90382	1.42381	0.507	0.99965	UP
XLOC_042385	CCL28	5	43376644	43412391	0.410833	1.10123	1.42249	0.1739	0.99965	UP
XLOC_009963	ME3	11	86431589	86672636	2.70997	7.26373	1.42243	0.02775	0.78352	UP
XLOC_023327	BRCA1	17	43044294	43125483	0.363509	0.969388	1.41508	0.03525	0.885268	UP
XLOC_018247	PRTG	15	55611545	55743090	0.252202	0.672204	1.41432	0.1908	0.99965	UP
XLOC_032184	ADNP-AS1	20	50888918	50958555	0.277568	0.739718	1.41414	0.55545	0.99965	UP
XLOC_000029	SAMD11	1	924879	959309	0.289048	0.768365	1.41049	0.2658	0.99965	UP
XLOC_029432	AC093850.2	2	215530446	215843722	1.92816	5.12535	1.41043	0.4363	0.99965	UP
XLOC_018542	ADAMTS7	15	78759202	78898133	4.59373	12.2039	1.4096	0.3698	0.99965	UP
XLOC_019687	C16orf86	16	67662944	67668758	0.592912	1.57416	1.40869	0.31195	0.99965	UP
XLOC_026216	MIR125A,SPACA6P	19	51685362	51712387	2.3424	6.21538	1.40786	0.1471	0.99965	UP
XLOC_026893	BST2	19	17402938	17405648	1.58485	4.19763	1.40523	0.0993	0.99965	UP
XLOC_033474	CH507-145C22.4,CH507-154B10.2	21	6986449	6997765	0.237338	0.628118	1.40409	0.33485	0.99965	UP
XLOC_028978	TNFAIP6	2	151357591	151380048	3.6941	9.77596	1.40401	0.04815	0.99965	UP
XLOC_015326	BATF	14	75522424	75547015	0.519026	1.37348	1.40396	0.2697	0.99965	UP
XLOC_004293	ADAMTS4	1	161184307	161214395	0.399203	1.05619	1.40367	0.5451	0.99965	UP
XLOC_002832	ARHGEF19	1	16197853	16212609	3.27037	8.64576	1.40254	0.05505	0.99965	UP
XLOC_005659	DDIT4	10	72273919	72276036	32.1198	84.8978	1.40227	0.08815	0.99965	UP
XLOC_006271	AKR1C2	10	4922563	5135226	10.7371	28.3793	1.40223	0.26635	0.99965	UP
XLOC_031853	RPL24P2	20	21114722	21115197	0.546804	1.44513	1.4021	0.3387	0.99965	UP
XLOC_008045	FADS2,FEN1	11	61680432	61867354	12.1645	32.118	1.40071	0.13165	0.99965	UP
XLOC_040606	SORBS2	4	185585443	185956652	20.8437	54.7013	1.39196	0.01315	0.503195	UP
XLOC_038687	LINC01094	4	78645902	78682699	0.170236	0.446693	1.39175	0.32155	0.99965	UP
XLOC_027636	AC008746.12	19	54438664	54439544	0.177502	0.465177	1.38994	0.4196	0.99965	UP
XLOC_040055	DDIT4L	4	99948085	100215505	0.467903	1.22409	1.38743	0.6766	0.99965	UP
XLOC_036517	TMEM44-AS1	3	194584010	194672477	0.177321	0.462908	1.38436	0.5223	0.99965	UP
XLOC_058025	SHOX	X	624343	659411	0.462819	1.2077	1.38374	0.1697	0.99965	UP
XLOC_024064	RP11-61L19.3	18	9475008	9538116	0.216789	0.565695	1.38373	0.62705	0.99965	UP
XLOC_052461	ADAMTS13	9	133376366	133459402	0.627652	1.63608	1.38221	0.4468	0.99965	UP
XLOC_004633	CHI3L1	1	203178930	203186749	117.258	305.392	1.38097	0.024	0.736234	UP
XLOC_022883	ALDH3A1	17	19737681	19748943	0.240381	0.625917	1.38065	0.06465	0.99965	UP
XLOC_048534	PDK4	7	95583498	95596491	1.32568	3.44403	1.37736	0.0451	0.99965	UP
XLOC_048398	PMS2P10	7	75288119	75299795	0.284149	0.737026	1.37507	0.3858	0.99965	UP
XLOC_053389	PAPPA-AS1	9	116153803	116402322	16.9067	43.8204	1.37401	0.19005	0.99965	UP
XLOC_017635	RP11-326A19.4	15	89041222	89082819	0.294037	0.761949	1.3737	0.4221	0.99965	UP
XLOC_021717	AC084809.2	17	32492521	32878637	0.298187	0.772396	1.37312	0.6262	0.99965	UP
XLOC_023579	BZRAP1	17	58301227	58417595	1.0888	2.82022	1.37307	0.28205	0.99965	UP
XLOC_008227	MRGPRF-AS1	11	69004393	69018447	0.923327	2.38997	1.37208	0.69375	0.99965	UP
XLOC_043811	HLA-F	6	29722774	29749049	3.35469	8.67007	1.36986	0.1718	0.99965	UP
XLOC_001502	RP11-126K1.8	1	151340639	151348027	0.879217	2.27103	1.36906	0.63895	0.99965	UP
XLOC_052258	PAPPA	9	116153803	116402322	9.85269	25.4341	1.36817	0.0461	0.99965	UP
XLOC_008958	OSBPL5	11	3087115	3166739	6.52237	16.8212	1.36681	0.0098	0.419123	UP
XLOC_050737	RP11-400K9.4	8	53515169	53523931	0.64675	1.66455	1.36385	0.1328	0.99965	UP
XLOC_008347	DGAT2	11	75758454	76143195	1.98851	5.11346	1.36261	0.25875	0.99965	UP
XLOC_050767	LINC00968	8	56436673	56559823	5.39385	13.8545	1.36097	0.17745	0.99965	UP
XLOC_003950	ANKRD35	1	145866559	145885866	0.923773	2.37129	1.36006	0.09515	0.99965	UP
XLOC_015519	RP11-638I2.6	14	100207406	100306547	2.37869	6.10458	1.35973	0.6537	0.99965	UP
XLOC_006027	DUSP5	10	110497837	110511544	7.35056	18.8607	1.35945	0.01025	0.428291	UP
XLOC_038803	RP11-696N14.1	4	99088856	99301356	0.988553	2.53585	1.35908	0.1372	0.99965	UP
XLOC_026644	SH2D3A	19	6752159	6767588	0.184643	0.473302	1.35802	0.1899	0.99965	UP
XLOC_018031	RP11-265N7.1	15	38865321	39427195	0.44719	1.14529	1.35675	0.37635	0.99965	UP
XLOC_002319	EPHX1	1	225810091	225882369	25.1634	64.4008	1.35575	0.02845	0.796824	UP
XLOC_046614	EEPD1	7	36153148	36301543	2.0191	5.16683	1.35557	0.1927	0.99965	UP
XLOC_026924	CRLF1	19	18571729	18621039	28.564	73.0341	1.35437	0.3748	0.99965	UP
XLOC_046060	MAP3K5	6	136557046	136792518	2.53329	6.46899	1.35253	0.0329	0.857712	UP
XLOC_039469	PPP2R2C	4	6320577	6563600	0.704947	1.79997	1.35239	0.2156	0.99965	UP
XLOC_017243	TEX9	15	56244008	56465137	0.547587	1.39528	1.3494	0.30805	0.99965	UP
XLOC_024306	KATNAL2	18	46803223	47102243	0.196297	0.500011	1.34893	0.2641	0.99965	UP
XLOC_006994	SORBS1	10	95311770	95561414	0.18347	0.467309	1.34883	0.13025	0.99965	UP
XLOC_036107	ARMC8	3	138187247	138329886	6.8981	17.5575	1.34781	0.0263	0.767765	UP
XLOC_027222	GMFG	19	39328352	39342372	0.225683	0.573911	1.34653	0.2366	0.99965	UP
XLOC_046673	AC004453.8	7	44379120	44490880	0.523548	1.32756	1.34238	0.62845	0.99965	UP
XLOC_021761	AC015849.2	17	35868966	35885863	0.296577	0.751652	1.34166	0.62755	0.99965	UP
XLOC_005648	UNC5B	10	71212569	71302864	9.90304	25.0932	1.34135	0.00875	0.395136	UP
XLOC_004701	PLXNA2	1	208022241	208244320	2.20181	5.57829	1.34113	0.01055	0.437059	UP
XLOC_019949	ZNF469	16	88427470	88440757	0.98981	2.50655	1.34048	0.018	0.615854	UP
XLOC_026716	OLFM2	19	9853717	9936552	0.354389	0.895847	1.33792	0.20265	0.99965	UP
XLOC_022083	ABCC3	17	50634776	50692252	14.394	36.3557	1.33672	0.016	0.570235	UP
XLOC_007655	FIBIN	11	26994183	26996121	7.5817	19.1289	1.33516	0.01855	0.633182	UP
XLOC_037368	LSAMP	3	115802362	117139389	10.191	25.6967	1.33428	0.15365	0.99965	UP
XLOC_014087	SLC46A3	13	28700063	28718970	2.7313	6.88647	1.33418	0.0397	0.934106	UP
XLOC_015716	TMEM121	14	105526602	105530202	1.42878	3.59949	1.33301	0.1302	0.99965	UP
XLOC_005590	LINC01515	10	65570337	65768835	0.780052	1.96437	1.33243	0.0718	0.99965	UP
XLOC_029141	LINC01117	2	176629588	176655958	0.554805	1.39388	1.32905	0.53715	0.99965	UP
XLOC_015288	ACOT1	14	73478483	73558947	2.10282	5.28253	1.32891	0.16445	0.99965	UP
XLOC_024831	GAREM	18	32018371	32470484	0.47968	1.20341	1.32699	0.19985	0.99965	UP
XLOC_041078	PIK3R1	5	68215719	68301821	4.68874	11.7351	1.32356	0.0092	0.409105	UP
XLOC_023735	ABCA6	17	69078701	69141888	0.423144	1.05735	1.32123	0.1829	0.99965	UP
XLOC_017551	IL16	15	81159574	81324183	2.71663	6.7803	1.31953	0.0895	0.99965	UP
XLOC_005974	SFXN2	10	102714537	102743492	0.245733	0.613073	1.31897	0.2113	0.99965	UP
XLOC_011113	HSD17B6	12	56712427	56787790	1.28688	3.20393	1.31597	0.5711	0.99965	UP
XLOC_013110	RNU4-2	12	120291762	120291903	75.9031	188.878	1.31522	0.2348	0.99965	UP
XLOC_025908	ZFP36	19	39406812	39409412	9.3845	23.3376	1.31431	0.01485	0.541188	UP
XLOC_017077	CHAC1	15	40952961	40956519	8.91588	22.1474	1.31269	0.025	0.753867	UP
XLOC_004476	KIAA1614-AS1	1	180913153	181023121	0.5969	1.47771	1.30781	0.66765	0.99965	UP
XLOC_005224	PTER	10	16436942	16522005	1.79825	4.44425	1.30534	0.0824	0.99965	UP
XLOC_015181	HIF1A,SNAPC1	14	61681040	61796428	109.226	269.756	1.30434	0.0429	0.977757	UP
XLOC_058082	FRMPD4	X	12138465	12724523	0.441129	1.08854	1.30311	0.0864	0.99965	UP
XLOC_001561	S100A1	1	153618786	153646306	0.17209	0.424362	1.30213	0.51635	0.99965	UP
XLOC_043191	PDGFRB	5	150113836	150155872	39.0691	96.0535	1.29781	0.01355	0.510442	UP
XLOC_004107	S100A3	1	153543612	153550136	0.367352	0.902001	1.29596	0.58205	0.99965	UP
XLOC_015770	RPPH1	14	20343047	20357905	8.68145	21.2732	1.29303	0.1895	0.99965	UP
XLOC_008065	METTL12	11	62646847	62673687	1.35873	3.32902	1.29284	0.57985	0.99965	UP
XLOC_029653	RAMP1	2	237858892	237912114	4.49007	11.0008	1.2928	0.0888	0.99965	UP
XLOC_025409	ZNF491	19	11796083	11809622	0.293294	0.718295	1.29223	0.26705	0.99965	UP
XLOC_006754	AIFM2	10	70052795	70132934	5.76657	14.0844	1.28831	0.0367	0.897547	UP
XLOC_008047	BEST1	11	61949820	61967660	0.757494	1.84996	1.28819	0.3142	0.99965	UP
XLOC_040891	SLC1A3	5	36606354	36725195	6.38466	15.5898	1.28792	0.0087	0.395136	UP
XLOC_039412	SLC26A1	4	958886	1004506	0.420132	1.02471	1.28631	0.4741	0.99965	UP
XLOC_038259	KLF17P2,LINC01085	4	14111967	14143592	0.571478	1.39374	1.2862	0.1889	0.99965	UP
XLOC_048000	ZNRF2P2	7	29598794	29742594	0.339992	0.82908	1.28601	0.4863	0.99965	UP
XLOC_031897	ZNF337-AS1	20	25612934	25696841	0.398228	0.970788	1.28556	0.435	0.99965	UP
XLOC_016154	HIF1A-AS1	14	61681040	61796428	0.347687	0.847443	1.28533	0.62805	0.99965	UP
XLOC_043531	RP11-428J1.5	6	5029971	5054423	0.922484	2.24752	1.28474	0.35345	0.99965	UP
XLOC_025628	ZNF93	19	19900912	19963464	0.591797	1.44082	1.28372	0.1616	0.99965	UP
XLOC_049738	CRISPLD1	8	74984514	75034558	0.948274	2.3069	1.28258	0.2116	0.99965	UP
XLOC_018481	RPP25	15	74954415	75021496	0.337048	0.817088	1.27754	0.3902	0.99965	UP
XLOC_036031	RP11-434H6.6	3	129087568	129161293	0.211804	0.513313	1.27711	0.6402	0.99965	UP
XLOC_014319	RP11-245D16.4	13	52454774	52455331	0.216075	0.523416	1.27643	0.4956	0.99965	UP
XLOC_019320	PYCARD-AS1	16	31201484	31203452	0.500228	1.21149	1.27613	0.44925	0.99965	UP
XLOC_009337	RP11-58K22.5	11	44564426	44620363	0.224131	0.542285	1.27471	0.6385	0.99965	UP
XLOC_052980	RP11-460E7.8	9	65816931	65817472	0.225293	0.545023	1.27452	0.4956	0.99965	UP
XLOC_022748	TMEM220	17	10672473	10815164	0.395996	0.95775	1.27416	0.4501	0.99965	UP
XLOC_014585	COL4A2-AS1	13	110148962	110513027	0.225948	0.546433	1.27405	0.62685	0.99965	UP
XLOC_029658	FAM132B	2	238158981	238168900	0.823222	1.98956	1.2731	0.1535	0.99965	UP
XLOC_024665	RP11-703I16.1	18	12031177	12032181	0.468057	1.13089	1.27271	0.3805	0.99965	UP
XLOC_010270	RP11-110I1.11	11	118998141	119030906	0.236758	0.571935	1.27244	0.63315	0.99965	UP
XLOC_049903	SPAG1	8	100157905	100414459	0.672853	1.62444	1.27157	0.46685	0.99965	UP
XLOC_041055	RP11-307L14.1	5	65020037	65020551	0.242769	0.585833	1.2709	0.4956	0.99965	UP
XLOC_031366	AC007879.5	2	207239649	207625928	0.228352	0.549582	1.26708	0.5624	0.99965	UP
XLOC_036951	UQCRC1	3	48599001	48610976	48.966	117.848	1.26707	0.057	0.99965	UP
XLOC_029931	RP11-195B17.1	2	27042363	27071773	0.269128	0.646822	1.26508	0.6333	0.99965	UP
XLOC_029892	TP53I3	2	24076525	24201698	7.79468	18.7282	1.26465	0.0913	0.99965	UP
XLOC_020121	MMP25-AS1	16	3046680	3060726	0.723609	1.73679	1.26314	0.3263	0.99965	UP
XLOC_021492	SNORD3A	17	19188015	19188714	10.9376	26.2513	1.2631	0.05875	0.99965	UP
XLOC_053408	C5	9	120952334	121050276	0.558106	1.3395	1.26308	0.1147	0.99965	UP
XLOC_050557	RBPMS-AS1	8	30382118	30572261	0.882459	2.11658	1.26213	0.5176	0.99965	UP
XLOC_028233	SLC1A4	2	64988476	65023865	8.88377	21.2994	1.26157	0.012	0.474163	UP
XLOC_007313	IFITM1,IFITM2	11	307630	315272	176.591	422.545	1.25869	0.01795	0.615592	UP
XLOC_019686	PARD6A	16	67660945	67662778	0.336287	0.804029	1.25755	0.25135	0.99965	UP
XLOC_006796	RP11-345K20.2	10	73422258	73422696	0.310572	0.742276	1.25703	0.497	0.99965	UP
XLOC_002839	CROCCP3	1	16460947	16499257	0.773448	1.84823	1.25677	0.41535	0.99965	UP
XLOC_009487	PRG2,RP11-872D17.8,SLC43A3	11	57386793	57427580	11.0182	26.326	1.25659	0.00795	0.374113	UP
XLOC_003182	CITED4	1	40861050	40862366	2.13071	5.08767	1.25567	0.1096	0.99965	UP
XLOC_038154	STX18-AS1	4	4348139	4710938	0.218577	0.521462	1.25442	0.4569	0.99965	UP
XLOC_007512	TMEM9B-AS1	11	8947293	8977527	0.666674	1.59042	1.25435	0.5788	0.99965	UP
XLOC_031021	CD302,LY75,LY75-CD302	2	159712456	159904749	2.53455	6.03955	1.25271	0.3025	0.99965	UP
XLOC_052409	PRRX2	9	129665640	129722674	10.7739	25.6577	1.25185	0.02765	0.78352	UP
XLOC_013441	LINC00545	13	30881932	30977623	0.344787	0.820201	1.25027	0.65025	0.99965	UP
XLOC_014273	LPAR6	13	48303750	48481986	2.85003	6.77558	1.24937	0.30605	0.99965	UP
XLOC_042056	SLC12A7	5	1050375	1112035	1.78994	4.25011	1.24758	0.05255	0.99965	UP
XLOC_029352	PARD3B	2	204545792	205620162	1.79173	4.25366	1.24736	0.02055	0.665518	UP
XLOC_019741	RP11-394B2.1	16	70661203	70686066	10.2561	24.3191	1.24561	0.0472	0.99965	UP
XLOC_032899	KCNG1	20	50999369	51023129	4.06616	9.63487	1.2446	0.0548	0.99965	UP
XLOC_028972	AC144449.1	2	149569633	149859191	0.246765	0.583692	1.24207	0.665	0.99965	UP
XLOC_039810	RP11-453E17.3	4	67701279	68129880	0.539337	1.27244	1.23834	0.41525	0.99965	UP
XLOC_007355	AC068580.6	11	1732409	1764025	2.92469	6.89934	1.23817	0.64425	0.99965	UP
XLOC_028540	CNNM4	2	96760901	96811891	3.87336	9.13138	1.23725	0.3673	0.99965	UP
XLOC_025200	GADD45B	19	2476121	2478259	35.1362	82.7705	1.23616	0.0142	0.524067	UP
XLOC_001046	LRRC8B	1	89524835	89936611	0.555804	1.30892	1.23572	0.5669	0.99965	UP
XLOC_005947	KAZALD1	10	101061840	101068131	4.02713	9.4774	1.23474	0.1119	0.99965	UP
XLOC_014868	RP11-66N24.3	14	23511759	23578800	0.988586	2.3247	1.2336	0.2253	0.99965	UP
XLOC_058444	GPR173	X	53049090	53080615	0.508662	1.19544	1.23277	0.12635	0.99965	UP
XLOC_045287	LY6G5C	6	31676683	31684040	0.376361	0.884383	1.23256	0.2794	0.99965	UP
XLOC_026004	ZNF221	19	43951222	43967709	0.582811	1.36933	1.23237	0.2671	0.99965	UP
XLOC_015712	RPS20P33	14	105209285	105398147	0.448869	1.05282	1.2299	0.6402	0.99965	UP
XLOC_006952	PPP1R3C	10	91628441	91633054	35.8876	83.9069	1.22531	0.02315	0.717749	UP
XLOC_003674	RP11-57H12.5	1	95117337	95278940	0.205918	0.481214	1.22461	0.44865	0.99965	UP
XLOC_015942	SRP54-AS1	14	34920857	35029567	0.247525	0.578329	1.22432	0.4902	0.99965	UP
XLOC_046403	MIOS	7	7550103	7608929	7.37116	17.218	1.22395	0.02975	0.820508	UP
XLOC_004795	DUSP10	1	221701423	221742176	6.44963	15.0544	1.2229	0.0564	0.99965	UP
XLOC_045388	RP1-179N16.6	6	36146697	36232790	0.531851	1.24113	1.22256	0.59925	0.99965	UP
XLOC_015899	PRKD1	14	29576478	30297043	9.58581	22.3654	1.2223	0.01565	0.560509	UP
XLOC_048330	PMS2P4	7	67295607	67321526	0.961036	2.24142	1.22175	0.6949	0.99965	UP
XLOC_009124	MRVI1	11	10541271	10693988	10.0083	23.2974	1.21897	0.0337	0.864253	UP
XLOC_023501	FAM117A	17	49700942	49836454	1.053	2.45072	1.21869	0.45785	0.99965	UP
XLOC_040592	ACSL1	4	184755594	184826818	13.8289	32.1841	1.21866	0.01665	0.586217	UP
XLOC_001199	KIAA1324	1	109105950	109206781	0.255112	0.593386	1.21784	0.19525	0.99965	UP
XLOC_001606	RP11-263K19.4	1	155195587	155227422	2.60255	6.05245	1.21759	0.47795	0.99965	UP
XLOC_020056	LA16c-395F10.1	16	1612324	1702280	0.517009	1.20223	1.21746	0.65665	0.99965	UP
XLOC_031416	LINC00607	2	215530446	215843722	1.44148	3.3504	1.21678	0.12865	0.99965	UP
XLOC_041092	MARVELD2	5	69415111	69444330	0.388313	0.901062	1.21441	0.19195	0.99965	UP
XLOC_030796	HS6ST1	2	128236715	128318577	2.84948	6.60809	1.21353	0.0313	0.844403	UP
XLOC_023603	CTD-2510F5.4	17	59155498	59215247	0.543426	1.25934	1.21252	0.66095	0.99965	UP
XLOC_058013	MT-TA	MT	5586	5655	9242.3	21408.4	1.21185	0.5349	0.99965	UP
XLOC_009584	FADS3	11	61873518	61892051	43.877	101.606	1.21144	0.034	0.868882	UP
XLOC_041729	MIR143HG	5	149406688	149428678	2.87827	6.64181	1.20638	0.2276	0.99965	UP
XLOC_039955	COQ2	4	83261535	83284914	2.34965	5.41592	1.20476	0.1236	0.99965	UP
XLOC_028354	RP11-342K6.2	2	75646782	75710989	1.40808	3.2439	1.204	0.6845	0.99965	UP
XLOC_049353	EPHX2	8	27490778	27545564	0.203412	0.467964	1.20199	0.2924	0.99965	UP
XLOC_021548	DHRS7B	17	21123363	21193265	5.77991	13.2825	1.20041	0.09185	0.99965	UP
XLOC_051236	SNTB1	8	120380760	120813359	6.83384	15.6624	1.19653	0.05285	0.99965	UP
XLOC_020467	RP11-426C22.4	16	29053731	29220031	0.50269	1.15091	1.19504	0.34095	0.99965	UP
XLOC_005566	CDK1	10	60778330	60794852	0.798042	1.82503	1.19339	0.1682	0.99965	UP
XLOC_030786	LIMS2	2	127638380	127681786	10.6818	24.4186	1.19283	0.03085	0.840056	UP
XLOC_011321	ACSS3	12	80792519	81759553	0.751484	1.71626	1.19145	0.35815	0.99965	UP
XLOC_011929	ANO2	12	5531868	5946232	0.198427	0.453018	1.19096	0.2022	0.99965	UP
XLOC_011503	RP11-61E11.1	12	104986309	105084577	0.680695	1.5536	1.19053	0.64575	0.99965	UP
XLOC_024375	RP11-35G9.3,RP11-35G9.5	18	57630301	57803101	0.371299	0.846957	1.18971	0.4263	0.99965	UP
XLOC_012514	NFE2	12	54230939	54351849	0.211771	0.482591	1.18829	0.5921	0.99965	UP
XLOC_012750	RP11-585P4.6	12	75234739	75390928	0.242319	0.552183	1.18824	0.5585	0.99965	UP
XLOC_019980	CPNE7	16	89575767	89597246	2.59225	5.90282	1.1872	0.12355	0.99965	UP
XLOC_019231	CCDC101	16	28553708	28591790	2.14015	4.86402	1.18444	0.13025	0.99965	UP
XLOC_018794	RP11-89K11.1	15	101737098	101745710	0.276135	0.627323	1.18384	0.4254	0.99965	UP
XLOC_017057	KNSTRN	15	40382720	40394246	4.54714	10.3288	1.18365	0.07745	0.99965	UP
XLOC_036781	OSBPL10	3	31657889	32077580	4.54064	10.3109	1.18319	0.0521	0.99965	UP
XLOC_023515	COL1A1	17	50183288	50201632	1513.9	3437.21	1.18296	0.54165	0.99965	UP
XLOC_014243	ERICH6B	13	45464897	45615739	0.286731	0.650573	1.18201	0.6482	0.99965	UP
XLOC_032734	SAMHD1	20	36876120	36951843	4.44386	10.0706	1.18026	0.03185	0.855589	UP
XLOC_044160	LINC01564	6	53628379	53631394	0.316821	0.716798	1.1779	0.48265	0.99965	UP
XLOC_033365	MX2	21	41361942	41409390	0.377297	0.853065	1.17695	0.25215	0.99965	UP
XLOC_041277	NR2F1	5	93409358	93594615	11.1373	25.1432	1.17477	0.09755	0.99965	UP
XLOC_021707	RP11-227G15.2	17	32266175	32381886	0.792001	1.78694	1.17392	0.6487	0.99965	UP
XLOC_005099	AL603831.1	10	274189	689743	15.4526	34.8338	1.17264	0.6125	0.99965	UP
XLOC_001747	RP11-359K18.4	1	162561505	162599842	0.37382	0.841161	1.17004	0.65835	0.99965	UP
XLOC_018678	IDH2	15	90083044	90102504	12.4138	27.9089	1.16878	0.0357	0.890138	UP
XLOC_045924	COL10A1	6	116100848	116249497	1.51501	3.40135	1.16678	0.49865	0.99965	UP
XLOC_000584	RP5-864K19.4	1	38838197	38941799	0.637299	1.43077	1.16675	0.6247	0.99965	UP
XLOC_002652	MORN1	1	2321252	2391707	0.476939	1.07035	1.1662	0.29735	0.99965	UP
XLOC_014274	RCBTB2	13	48488958	48533256	3.20308	7.18262	1.16505	0.0504	0.99965	UP
XLOC_003734	HENMT1	1	108648289	108661526	0.67854	1.51967	1.16325	0.2163	0.99965	UP
XLOC_007967	SERPING1	11	57597386	57614853	28.0741	62.8412	1.16247	0.0326	0.857712	UP
XLOC_036976	GPX1	3	49357175	49358600	126.16	282.324	1.16209	0.0267	0.770327	UP
XLOC_009115	RP11-540A21.2	11	9754769	10294207	0.315136	0.704939	1.16152	0.7268	0.99965	UP
XLOC_020548	RP11-452L6.1	16	31449534	31453493	0.447763	1.00052	1.15994	0.49105	0.99965	UP
XLOC_005821	ACTA2-AS1	10	88879733	89015785	0.664521	1.48425	1.15935	0.53095	0.99965	UP
XLOC_040538	ASB5	4	176213672	176277571	0.341741	0.763298	1.15934	0.466	0.99965	UP
XLOC_017392	RP11-279F6.1	15	69463025	69571440	0.817034	1.82486	1.15932	0.28775	0.99965	UP
XLOC_013571	MED4-AS1	13	48053322	48095131	1.46051	3.26172	1.15916	0.56085	0.99965	UP
XLOC_012095	AC010168.1	12	14774382	14778002	38.5099	85.8426	1.15646	0.3614	0.99965	UP
XLOC_018902	MIR940,RP11-304L19.13	16	2253115	2273418	0.751887	1.67589	1.15634	0.50715	0.99965	UP
XLOC_000699	TSPAN1	1	46040139	46185958	0.418463	0.932595	1.15615	0.41895	0.99965	UP
XLOC_022547	NXN	17	799312	979770	10.3329	22.9882	1.15365	0.0216	0.684282	UP
XLOC_038812	BANK1	4	101411285	102074812	0.22607	0.502652	1.15279	0.33015	0.99965	UP
XLOC_060354	IRAK1	X	154010499	154019995	43.5635	96.7804	1.1516	0.03365	0.864253	UP
XLOC_043656	ALDH5A1	6	24402907	24537207	0.780105	1.73304	1.15157	0.371	0.99965	UP
XLOC_010565	RP11-266K4.9	12	8232511	8242948	0.375019	0.832599	1.15066	0.4971	0.99965	UP
XLOC_047457	RPL41	7	137381036	137847092	0.525708	1.16619	1.14947	0.6755	0.99965	UP
XLOC_050712	SNAI2	8	48917689	48921740	11.846	26.2755	1.14932	0.03	0.823075	UP
XLOC_041047	RNF180	5	64165843	64372869	0.218277	0.483708	1.14798	0.38955	0.99965	UP
XLOC_032255	RP5-907D15.4	20	58634771	58635738	0.210966	0.467363	1.14753	0.4227	0.99965	UP
XLOC_022075	EME1	17	50373219	50397888	0.272005	0.602178	1.14656	0.46215	0.99965	UP
XLOC_045126	HIST1H4H	6	26285112	26285509	0.548422	1.21404	1.14646	0.4914	0.99965	UP
XLOC_029115	AC010894.3	2	174487388	174488386	0.558064	1.2343	1.14519	0.4114	0.99965	UP
XLOC_038821	RP11-10L12.4	4	102794382	102868896	0.23571	0.521173	1.14475	0.6619	0.99965	UP
XLOC_036364	RP11-91K9.1	3	177816864	177899224	0.889056	1.96481	1.14405	0.3025	0.99965	UP
XLOC_016540	CKB	14	103519658	103523111	5.10959	11.2838	1.14297	0.15465	0.99965	UP
XLOC_036825	ITGA9-AS1	3	37452114	37861780	1.49796	3.30736	1.14268	0.1938	0.99965	UP
XLOC_022232	RP11-51F16.1	17	63622414	63702670	0.22933	0.505799	1.14114	0.69385	0.99965	UP
XLOC_035168	EMC3-AS1	3	9958716	10011209	0.374986	0.826975	1.14101	0.4489	0.99965	UP
XLOC_024458	CTD-2541J13.2	18	67506581	67899619	3.73436	8.23475	1.14086	0.1853	0.99965	UP
XLOC_004153	THBS3	1	155195587	155227422	5.43215	11.9778	1.14077	0.14015	0.99965	UP
XLOC_009720	SPTBN2	11	66685247	66729226	0.511392	1.12709	1.1401	0.19785	0.99965	UP
XLOC_021858	IGFBP4	17	40443460	40457731	1752.62	3860.82	1.13939	0.416	0.99965	UP
XLOC_008272	LRTOMT	11	71998540	72112780	1.19177	2.62133	1.13719	0.32445	0.99965	UP
XLOC_021500	SLC47A1	17	19495384	19597922	0.37151	0.817139	1.13718	0.2282	0.99965	UP
XLOC_049701	XKR9	8	70669364	70790371	0.277311	0.609455	1.13601	0.3095	0.99965	UP
XLOC_014486	ABCC4	13	95019828	95301446	3.43153	7.53665	1.13507	0.03245	0.857712	UP
XLOC_023686	TEX2	17	64147226	64263301	7.52975	16.5374	1.13506	0.0227	0.706811	UP
XLOC_031894	PYGB	20	25248068	25390983	28.0627	61.6309	1.135	0.05455	0.99965	UP
XLOC_034527	ADM2	22	50481555	50486440	3.71461	8.15134	1.13383	0.03515	0.884284	UP
XLOC_048153	TNS3	7	47275153	47582558	12.1732	26.682	1.13216	0.0253	0.753867	UP
XLOC_047352	RP11-62J1.3	7	128297684	128343908	0.880136	1.92788	1.13122	0.51755	0.99965	UP
XLOC_030427	TMEM150A	2	85598547	85649282	6.1045	13.3668	1.13071	0.4184	0.99965	UP
XLOC_017352	SLC24A1	15	65611365	65891991	1.39775	3.05822	1.12959	0.3634	0.99965	UP
XLOC_016051	RP11-247L20.4	14	50237562	50416461	1.05597	2.31034	1.12954	0.5901	0.99965	UP
XLOC_028599	IL1R1	2	102064543	102182108	18.7817	41.0676	1.12867	0.0259	0.75777	UP
XLOC_027728	ZNF418	19	57921883	57935393	0.607431	1.32793	1.12839	0.28185	0.99965	UP
XLOC_035403	ZBTB47	3	42547968	42665854	9.31454	20.3379	1.12661	0.2561	0.99965	UP
XLOC_027589	ZNF347	19	53107878	53159075	1.09285	2.38268	1.1245	0.2098	0.99965	UP
XLOC_025036	DSEL	18	67506581	67899619	2.1835	4.74862	1.12087	0.08815	0.99965	UP
XLOC_021926	CTD-3199J23.6,NBR2	17	43125609	43153671	1.74007	3.78035	1.11937	0.3576	0.99965	UP
XLOC_026056	CCDC61	19	45995460	46023065	1.61944	3.51758	1.11909	0.15905	0.99965	UP
XLOC_003887	CH17-472G23.2	1	120197084	120341871	1.26935	2.75613	1.11856	0.3303	0.99965	UP
XLOC_034928	BAIAP2L2	22	38084888	38110670	0.355594	0.772072	1.1185	0.47895	0.99965	UP
XLOC_001082	FNBP1L	1	93448130	93554661	3.53464	7.66922	1.11752	0.03985	0.935784	UP
XLOC_048458	HGF	7	81699005	81770438	0.202338	0.438861	1.117	0.2277	0.99965	UP
XLOC_023806	GALK1	17	75721327	75765711	6.43444	13.9495	1.11633	0.0827	0.99965	UP
XLOC_045437	TREML3P	6	41208712	41217947	0.260136	0.563602	1.11541	0.4206	0.99965	UP
XLOC_018998	ABAT	16	8674564	8869012	1.20323	2.6039	1.11377	0.3572	0.99965	UP
XLOC_035308	GPD1L	3	32105688	32168713	2.2567	4.87416	1.11094	0.0561	0.99965	UP
XLOC_000927	RP11-42O15.3	1	70445070	70445536	0.563202	1.21642	1.11092	0.4328	0.99965	UP
XLOC_031308	CFLAR-AS1	2	201116103	201176687	0.43168	0.932186	1.11065	0.19725	0.99965	UP
XLOC_035837	LINC00883	3	107240691	107421304	1.88496	4.06982	1.11043	0.18215	0.99965	UP
XLOC_026813	ADGRL1	19	14137178	14206187	1.22221	2.63547	1.10857	0.1648	0.99965	UP
XLOC_028551	ANKRD36	2	97113495	97264521	0.240162	0.517439	1.10738	0.37645	0.99965	UP
XLOC_035966	MYLK-AS1	3	123585541	123884331	0.317766	0.684534	1.10715	0.5723	0.99965	UP
XLOC_044406	RP1-199J3.5	6	99575711	99576456	0.364808	0.785578	1.10662	0.42445	0.99965	UP
XLOC_024775	RP11-799B12.1	18	23992772	24135829	1.50729	3.24012	1.10409	0.6535	0.99965	UP
XLOC_027407	SLC1A5	19	46719506	46789043	94.6452	203.382	1.10359	0.14935	0.99965	UP
XLOC_006947	ANKRD1	10	90912095	90921276	39.2184	84.2395	1.10297	0.0384	0.922933	UP
XLOC_003482	DEPDC1	1	68474151	68538627	0.224334	0.480945	1.10023	0.40475	0.99965	UP
XLOC_002693	GPR153	1	6247345	6260975	1.15439	2.47348	1.09941	0.1261	0.99965	UP
XLOC_045332	HLA-DMA,HLA-DMB,XXbac-BPG181M17.5	6	32934628	32981505	1.23511	2.64362	1.09787	0.42345	0.99965	UP
XLOC_028115	BCYRN1	2	47192404	47345074	0.225675	0.482681	1.09682	0.1776	0.99965	UP
XLOC_029279	AOX1	2	200585867	200677064	18.8926	40.3779	1.09575	0.03475	0.880313	UP
XLOC_048552	OR7E38P	7	97966089	97967074	3.35286	7.16354	1.09528	0.1592	0.99965	UP
XLOC_021131	CYBA	16	88643282	88651152	32.8437	70.1628	1.09509	0.03345	0.862405	UP
XLOC_036253	PTX3	3	157175222	157533619	304.474	650.318	1.09482	0.1444	0.99965	UP
XLOC_026458	CTD-2619J13.5	19	58345177	58366591	0.333519	0.710906	1.09189	0.6044	0.99965	UP
XLOC_035222	GALNT15	3	16174648	16231992	3.27106	6.96748	1.09088	0.0406	0.946097	UP
XLOC_032806	ADA	20	44531784	44652233	2.89289	6.14845	1.08771	0.3512	0.99965	UP
XLOC_044599	LAMA2	6	128883140	129516569	0.566377	1.20356	1.08747	0.2598	0.99965	UP
XLOC_010049	SESN3	11	95150538	95234104	1.44363	3.06362	1.08553	0.03615	0.891341	UP
XLOC_006376	TRDMT1	10	17142253	17202054	0.845141	1.79324	1.0853	0.31145	0.99965	UP
XLOC_051954	PSAT1	9	78297142	78330093	41.4262	87.8285	1.08415	0.04205	0.965954	UP
XLOC_053182	MIRLET7DHG	9	94166288	94204568	0.270305	0.572681	1.08314	0.4242	0.99965	UP
XLOC_037181	FAM86DP	3	75415069	75435110	5.66861	12.004	1.08245	0.0842	0.99965	UP
XLOC_041637	VTRNA1-1	5	140711274	140711373	189.151	400.312	1.08159	0.53665	0.99965	UP
XLOC_042071	RP11-43F13.1	5	1594625	1634005	1.43599	3.03874	1.08143	0.2946	0.99965	UP
XLOC_027722	ZNF154	19	57681968	57758159	0.422916	0.894807	1.0812	0.47155	0.99965	UP
XLOC_024010	DLGAP1-AS1	18	3496031	4455335	1.45213	3.07187	1.08094	0.46195	0.99965	UP
XLOC_047791	SNX8	7	2251769	2380745	10.5539	22.3249	1.08088	0.33915	0.99965	UP
XLOC_001449	CH17-189H20.1	1	149176021	149321732	0.251633	0.53165	1.07915	0.62825	0.99965	UP
XLOC_033840	LINC01547	21	44932813	44939913	3.96835	8.38293	1.07892	0.1489	0.99965	UP
XLOC_028051	GALM	2	38665909	38741237	3.22601	6.8135	1.07864	0.0898	0.99965	UP
XLOC_020931	MTSS1L	16	70661203	70686066	21.8828	46.1243	1.07573	0.4539	0.99965	UP
XLOC_042637	DMGDH	5	78997605	79236038	0.865153	1.82174	1.07429	0.3683	0.99965	UP
XLOC_006399	CASC10	10	21492657	21497262	0.209208	0.440145	1.07304	0.32225	0.99965	UP
XLOC_046274	RNASET2,RP11-514O12.4,RPS6KA2	6	166409363	166957191	33.6675	70.7441	1.07126	0.05215	0.99965	UP
XLOC_028939	KYNU	2	142877497	143055832	0.616661	1.2948	1.07017	0.2605	0.99965	UP
XLOC_035124	ITPR1	3	4493347	4887293	1.78163	3.73856	1.06929	0.0566	0.99965	UP
XLOC_003112	COL8A2	1	36095235	36125220	13.2302	27.7413	1.0682	0.0355	0.890009	UP
XLOC_009489	SLC43A1	11	57484533	57515786	1.63939	3.43479	1.06706	0.14305	0.99965	UP
XLOC_040267	PCDH18	4	137518917	137532494	10.7522	22.5255	1.06693	0.0459	0.99965	UP
XLOC_036950	COL7A1	3	48564072	48595267	15.368	32.1786	1.06618	0.1489	0.99965	UP
XLOC_019710	TANGO6	16	68843603	69085180	2.20752	4.61896	1.06514	0.1221	0.99965	UP
XLOC_000263	RP11-108M9.5	1	16740272	16972979	0.741111	1.54896	1.06354	0.6367	0.99965	UP
XLOC_029072	KLHL23,PHOSPHO2	2	169694453	169776989	0.552254	1.15412	1.06339	0.2508	0.99965	UP
XLOC_004904	RP5-1061H20.3,RP5-1061H20.4	1	229258280	229305894	0.624993	1.30583	1.06305	0.7051	0.99965	UP
XLOC_048408	HIP1	7	75533299	75738962	5.0176	10.4834	1.06303	0.0251	0.753867	UP
XLOC_003360	CDCP2,CYB5RL,RP11-446E24.4	1	54133073	54413479	1.11426	2.32635	1.06199	0.3939	0.99965	UP
XLOC_001326	PHGDH	1	119659797	119744215	20.8539	43.4881	1.0603	0.02655	0.770327	UP
XLOC_038963	SPRY1	4	123396794	123403760	1.6723	3.4871	1.06019	0.2467	0.99965	UP
XLOC_009587	FTH1	11	61949820	61967660	5825.55	12140.8	1.0594	0.40675	0.99965	UP
XLOC_007528	ADM	11	10304679	10307397	115.9	241.048	1.05644	0.07905	0.99965	UP
XLOC_031819	DSTN	20	17569862	17609919	330.829	688.043	1.05642	0.1459	0.99965	UP
XLOC_039418	RP11-1398P2.1	4	1574061	1580253	0.715983	1.48908	1.05642	0.42585	0.99965	UP
XLOC_017566	CSPG4P10,RP13-608F4.5	15	82459471	82513950	0.519766	1.08069	1.05602	0.55645	0.99965	UP
XLOC_001152	S1PR1	1	101236887	101241518	2.28442	4.74145	1.0535	0.1002	0.99965	UP
XLOC_047778	MICALL2	7	1428464	1459502	3.74763	7.76023	1.05012	0.09565	0.99965	UP
XLOC_008215	ALDH3B1	11	68008577	68030461	11.2321	23.247	1.04942	0.0455	0.99965	UP
XLOC_014618	GAS6	13	113759239	113864067	401.507	830.643	1.0488	0.2058	0.99965	UP
XLOC_009352	PEX16	11	45909668	45918812	4.64975	9.61565	1.04823	0.138	0.99965	UP
XLOC_025070	FBXO15	18	74073352	74147865	0.213965	0.442135	1.04711	0.30045	0.99965	UP
XLOC_012518	ITGA5	12	54353660	54548238	170.205	351.644	1.04684	0.1341	0.99965	UP
XLOC_020050	CLCN7	16	1444933	1475580	16.7297	34.5577	1.0466	0.17985	0.99965	UP
XLOC_029149	AC079305.10	2	177227594	177543836	0.88796	1.83378	1.04626	0.68895	0.99965	UP
XLOC_059254	RP11-706O15.5	X	3891437	3920746	0.85891	1.77125	1.04419	0.44725	0.99965	UP
XLOC_036175	AGTR1	3	148697783	148743008	0.953538	1.96049	1.03985	0.21825	0.99965	UP
XLOC_005189	PROSER2	10	11823338	11894700	2.2302	4.58106	1.03851	0.21775	0.99965	UP
XLOC_048911	HIPK2	7	139561569	140020325	8.8113	18.0968	1.03831	0.06485	0.99965	UP
XLOC_031755	C20orf196	20	5750392	5863912	0.877768	1.80268	1.03823	0.32095	0.99965	UP
XLOC_009170	PLEKHA7	11	16778294	17053024	0.228171	0.468029	1.03649	0.26655	0.99965	UP
XLOC_044942	TUBB2A	6	3153668	3157526	13.1838	27.0327	1.03594	0.0535	0.99965	UP
XLOC_042308	RAD1	5	34905263	34925996	11.9862	24.5446	1.03403	0.1906	0.99965	UP
XLOC_040974	CTD-2366F13.1	5	53095678	53115126	0.638285	1.30693	1.03391	0.6324	0.99965	UP
XLOC_006129	HTRA1	10	122461524	122514908	230.551	471.718	1.03284	0.137	0.99965	UP
XLOC_032476	TASP1	20	13389391	13638940	1.11721	2.2852	1.03242	0.19495	0.99965	UP
XLOC_039413	RNF212	4	1056249	1113562	1.7662	3.61154	1.03196	0.36375	0.99965	UP
XLOC_026441	CTD-2583A14.11	19	57769654	57916610	1.0661	2.17989	1.0319	0.75575	0.99965	UP
XLOC_045565	GCLC	6	53497340	53617171	21.952	44.8509	1.03079	0.1126	0.99965	UP
XLOC_031841	SLC24A3	20	19212645	19722937	0.718509	1.46751	1.0303	0.1979	0.99965	UP
XLOC_015061	ATP5S	14	50237562	50416461	1.59606	3.25653	1.02882	0.35405	0.99965	UP
XLOC_004859	JMJD4	1	227728538	227781231	2.61184	5.32681	1.0282	0.24285	0.99965	UP
XLOC_035359	XYLB	3	38346759	38421348	0.521137	1.061	1.02569	0.2599	0.99965	UP
XLOC_058374	PPP1R3F	X	49269842	49301461	1.02426	2.08444	1.02507	0.3686	0.99965	UP
XLOC_023674	LIMD2	17	63622414	63702670	3.05597	6.21901	1.02505	0.3053	0.99965	UP
XLOC_046617	ANLN	7	36324220	36453791	1.44498	2.93904	1.0243	0.2351	0.99965	UP
XLOC_050559	GSR	8	30678060	30727926	12.2039	24.8134	1.02378	0.03835	0.922933	UP
XLOC_000853	NFIA	1	60865258	61462793	1.17756	2.39182	1.0223	0.1481	0.99965	UP
XLOC_028285	VAX2	2	70900589	70933446	1.55033	3.1466	1.02122	0.2626	0.99965	UP
XLOC_022581	RP1-59D14.5	17	2054153	2381058	0.372754	0.756414	1.02095	0.6517	0.99965	UP
XLOC_027437	TMEM143	19	48332355	48364237	1.22597	2.48669	1.0203	0.2303	0.99965	UP
XLOC_037373	RP11-384F7.2	3	117672153	117997592	4.68153	9.49205	1.01974	0.24665	0.99965	UP
XLOC_027194	YIF1B	19	38305103	38317273	30.4178	61.6416	1.01899	0.06075	0.99965	UP
XLOC_025735	PLEKHF1	19	29665055	29675457	3.54845	7.18805	1.01841	0.14845	0.99965	UP
XLOC_012608	LRIG3	12	58872148	58920522	3.09066	6.25955	1.01814	0.08225	0.99965	UP
XLOC_007525	SBF2-AS1	11	9754769	10294207	0.72927	1.47547	1.01665	0.5631	0.99965	UP
XLOC_048535	SLC25A13	7	96120219	96322147	2.10836	4.26309	1.01578	0.1366	0.99965	UP
XLOC_020543	PYCARD	16	31201484	31203452	2.09576	4.23622	1.01531	0.362	0.99965	UP
XLOC_048681	AC002467.7	7	107742816	107761667	0.430183	0.869108	1.01458	0.65765	0.99965	UP
XLOC_049541	SPIDR	8	47260574	47736306	6.0826	12.2837	1.01399	0.1008	0.99965	UP
XLOC_023011	CORO6	17	29560546	30186475	1.15331	2.32805	1.01334	0.4359	0.99965	UP
XLOC_022632	CXCL16	17	4731427	4739922	1.85442	3.73946	1.01186	0.21925	0.99965	UP
XLOC_005132	AKR1E2	10	4786628	4848062	0.840534	1.69421	1.01123	0.28075	0.99965	UP
XLOC_053555	GBGT1	9	133152947	133163945	0.674784	1.3592	1.01026	0.25665	0.99965	UP
XLOC_046572	AQP1,FAM188B,INMT,INMT-FAM188B,RP5-877J2.1	7	30651942	30925516	0.606874	1.2224	1.01025	0.2312	0.99965	UP
XLOC_025194	IZUMO4	19	2071037	2099593	0.619822	1.24697	1.00851	0.4026	0.99965	UP
XLOC_006353	CDNF	10	14819249	14871741	0.299155	0.601736	1.00824	0.52925	0.99965	UP
XLOC_026974	ZNF708	19	21221499	21329425	0.583427	1.17347	1.00816	0.26655	0.99965	UP
XLOC_022831	RASD1	17	17494436	17496395	5.93605	11.9387	1.00807	0.09655	0.99965	UP
XLOC_006733	SLC25A16	10	68477998	68527474	1.54569	3.10408	1.00592	0.21365	0.99965	UP
XLOC_024268	MOCOS	18	36187518	36272157	1.1771	2.36336	1.0056	0.11395	0.99965	UP
XLOC_037639	PLSCR1	3	146515179	146544864	8.60551	17.275	1.00536	0.09405	0.99965	UP
XLOC_025958	CCDC97	19	41262495	41440717	2.55206	5.11854	1.00407	0.6308	0.99965	UP
XLOC_035490	CCDC36	3	49198427	49258104	0.304068	0.609652	1.00359	0.37165	0.99965	UP
XLOC_009096	STK33	11	8391867	8594289	0.226838	0.454533	1.00272	0.1646	0.99965	UP
XLOC_039854	IGJ	4	70628743	70686816	0.647321	1.29672	1.00232	0.3487	0.99965	UP
XLOC_028058	TMEM178A	2	39249265	39717963	5.97661	11.9693	1.00193	0.37645	0.99965	UP

## Sheet: Down_Regulated
Cuffmerge Gene ID	Gene Name	Chromosome	Gene Start (bp)	Gene End (bp)	FPKM 1	FPKM 2	log2(fold_change)	P_value	Q_value	Regulation
XLOC_000031	PLEKHN1	1	966496	982093	0.498354	0.128518	-1.95521	0.0898	0.99965	Down
XLOC_000033	AGRN	1	1020122	1056118	24.4553	11.6728	-1.067	0.0416	0.958646	Down
XLOC_000042	SCNN1D	1	1275222	1292029	3.5279	1.63558	-1.10901	0.3101	0.99965	Down
XLOC_000058	MMP23B	1	1632094	1745992	0.424413	0.127444	-1.73561	0.2289	0.99965	Down
XLOC_000115	PER3	1	7784319	7853512	2.492	0.997128	-1.32145	0.1115	0.99965	Down
XLOC_000215	PDPN	1	13583464	13617957	17.291	6.96041	-1.31278	0.05485	0.99965	Down
XLOC_000232	Metazoa_SRP	1	15756606	15786594	0.813728	0.366482	-1.1508	0.59895	0.99965	Down
XLOC_000267	RP11-380J14.1	1	17189782	17197617	0.861833	0.224203	-1.9426	0.07105	0.99965	Down
XLOC_000268	PADI1	1	17205125	17246005	0.747536	0.225435	-1.72943	0.1039	0.99965	Down
XLOC_000293	RP5-1056L3.3	1	19596976	19658456	0.438476	0.140127	-1.64576	0.54845	0.99965	Down
XLOC_000371	CLIC4	1	24745356	24844324	403.599	192.496	-1.0681	0.17825	0.99965	Down
XLOC_000490	TINAGL1	1	31576484	31587686	5.41031	1.99959	-1.43601	0.0693	0.99965	Down
XLOC_000558	SH3D21	1	36306386	36329221	9.14455	3.51922	-1.37766	0.18885	0.99965	Down
XLOC_000591	OXCT2P1	1	39491645	39558707	0.43204	0.214061	-1.01314	0.4822	0.99965	Down
XLOC_000660	PTPRF	1	43525186	43623666	40.6884	5.68288	-2.83992	5e-05	0.0106919	Down
XLOC_000664	ARTN	1	43933319	43937241	0.614125	0.190441	-1.68919	0.14375	0.99965	Down
XLOC_000963	ST6GALNAC5	1	76867440	77065711	0.48953	0.22245	-1.13791	0.4778	0.99965	Down
XLOC_000969	AK5	1	77282050	77559969	36.3118	17.6066	-1.04432	0.14385	0.99965	Down
XLOC_001083	RP5-1033H22.2	1	93561785	93847150	0.490028	0.241204	-1.02261	0.58925	0.99965	Down
XLOC_001125	PALMD	1	99645942	99694541	0.77937	0.284109	-1.45586	0.16925	0.99965	Down
XLOC_001177	NTNG1	1	107140006	107483458	0.733499	0.187333	-1.96919	0.0632	0.99965	Down
XLOC_001219	KCNC4	1	110211342	110283100	1.96232	0.627988	-1.64375	0.1344	0.99965	Down
XLOC_001245	FAM212B-AS1	1	111483347	111768016	0.752507	0.204566	-1.87914	0.52495	0.99965	Down
XLOC_001260	SLC16A1-AS1	1	112911846	112999496	1.29759	0.53291	-1.28387	0.4894	0.99965	Down
XLOC_001261	RP11-389O22.1	1	113008253	113073105	0.600251	0.299011	-1.00537	0.51705	0.99965	Down
XLOC_001302	PTGFRN	1	116910056	116990358	13.8646	5.36485	-1.3698	0.00705	0.342856	Down
XLOC_001476	CIART	1	150282542	150287093	5.38074	1.48725	-1.85516	0.02845	0.796824	Down
XLOC_001481	ECM1	1	150508061	150513789	110.596	24.9392	-2.14881	0.0001	0.0191329	Down
XLOC_001628	SEMA4A	1	156147365	156177752	0.641034	0.203734	-1.65372	0.07715	0.99965	Down
XLOC_001734	FCRLB	1	161721562	161728143	0.859634	0.254863	-1.754	0.05915	0.99965	Down
XLOC_001752	RGS4	1	163068774	163076802	361.719	21.9839	-4.04035	5e-05	0.0106919	Down
XLOC_001909	RALGPS2	1	178724305	178921841	14.6852	6.3776	-1.20328	0.03885	0.925769	Down
XLOC_001976	SWT1	1	185157079	185291765	1.20491	0.386677	-1.63972	0.0981	0.99965	Down
XLOC_001985	HMCN1	1	185734550	186190949	13.6884	5.28968	-1.3717	0.12735	0.99965	Down
XLOC_001994	PLA2G4A	1	186828952	186988981	7.57941	2.46845	-1.61848	0.0102	0.428291	Down
XLOC_002024	RGS2	1	192809038	192812283	9.08012	3.22364	-1.49402	0.04725	0.99965	Down
XLOC_002048	LHX9	1	197911901	197935478	2.4621	0.25679	-3.26122	0.00885	0.397185	Down
XLOC_002049	NEK7	1	198156962	198322420	179.189	42.7769	-2.06658	0.00085	0.0846565	Down
XLOC_002068	RP11-469A15.2	1	200473919	200478293	0.61938	0.119486	-2.37398	0.34085	0.99965	Down
XLOC_002103	PPP1R12B	1	202348698	202710417	6.90996	3.0358	-1.1866	0.0227	0.706811	Down
XLOC_002144	TMCC2	1	205228175	205273343	1.01228	0.502652	-1.00998	0.23885	0.99965	Down
XLOC_002163	RASSF5	1	206507529	206612463	1.35958	0.651093	-1.06223	0.4201	0.99965	Down
XLOC_002170	IL24	1	206897442	206904139	0.46465	0.0575739	-3.01266	0.06435	0.99965	Down
XLOC_002292	DISP1	1	222815021	223005995	17.2017	4.93058	-1.80272	0.1742	0.99965	Down
XLOC_002482	RP11-261C10.5	1	243124427	243255348	1.9202	0.859691	-1.15936	0.6968	0.99965	Down
XLOC_002606	FAM41C	1	868070	876903	0.736747	0.357998	-1.04122	0.544	0.99965	Down
XLOC_002621	FAM132A	1	1242445	1246722	1.33217	0.662749	-1.00725	0.41045	0.99965	Down
XLOC_002622	RP5-902P8.12	1	1249776	1251334	0.424901	0.210555	-1.01293	0.42985	0.99965	Down
XLOC_002669	MEGF6	1	3489919	3611495	17.4702	7.86134	-1.15205	0.03575	0.890138	Down
XLOC_002711	UTS2	1	7784319	7853512	1.32874	0.438482	-1.59947	0.4865	0.99965	Down
XLOC_002732	SLC2A5	1	9035106	9088478	2.25692	0.780145	-1.53254	0.0561	0.99965	Down
XLOC_002778	RP11-474O21.5	1	12618899	12619244	2.59195	0.881729	-1.55563	0.32115	0.99965	Down
XLOC_002857	PADI2	1	17066760	17119435	1.79274	0.0188984	-6.56775	0.093	0.99965	Down
XLOC_002887	SH2D5	1	20719731	20732837	1.63822	0.717611	-1.19086	0.1762	0.99965	Down
XLOC_002895	NBPF2P	1	21424624	21427967	0.512049	0.166469	-1.62102	0.37925	0.99965	Down
XLOC_002940	RP4-594I10.3	1	24502350	24556024	0.627596	0.261689	-1.26199	0.55	0.99965	Down
XLOC_003045	FABP3	1	31365624	31376850	4.15645	1.19965	-1.79274	0.0687	0.99965	Down
XLOC_003168	MYCL	1	39895425	39902256	0.439367	0.040851	-3.42699	0.05645	0.99965	Down
XLOC_003171	RP1-39G22.7	1	40256426	40257967	1.07539	0.456718	-1.23548	0.24575	0.99965	Down
XLOC_003213	HYI	1	43389881	43456995	29.0755	9.76848	-1.5736	0.09435	0.99965	Down
XLOC_003249	TESK2	1	45329162	45491166	0.434236	0.202523	-1.10039	0.5641	0.99965	Down
XLOC_003291	SKINTL	1	48096091	48182428	1.01653	0.32786	-1.6325	0.24105	0.99965	Down
XLOC_003320	RAB3B	1	51907955	51990764	16.5523	5.6496	-1.55081	0.0037	0.231904	Down
XLOC_003396	JUN	1	58780787	58784327	36.5885	14.6087	-1.32456	0.0139	0.516931	Down
XLOC_003399	RP4-794H19.1	1	58785159	58899594	1.22566	0.212817	-2.52588	0.16755	0.99965	Down
XLOC_003458	RP4-598P13.1	1	66533382	66748299	0.426741	0.126423	-1.75511	0.4445	0.99965	Down
XLOC_003558	TTLL7	1	83865027	83999150	2.49298	0.824476	-1.59632	0.18115	0.99965	Down
XLOC_003570	MCOLN2	1	84925582	84997113	0.59659	0.244214	-1.28859	0.21745	0.99965	Down
XLOC_003575	BCL10	1	85266247	85578363	11.5691	4.57616	-1.33807	0.51805	0.99965	Down
XLOC_003687	MIR137,MIR137HG	1	97987999	98049863	1.6524	0.778627	-1.08556	0.25145	0.99965	Down
XLOC_003696	LRRC39	1	100133149	100178273	0.927576	0.440191	-1.07534	0.59535	0.99965	Down
XLOC_003763	SLC16A4	1	110347115	110443817	6.17509	1.54084	-2.00275	0.1867	0.99965	Down
XLOC_003783	OVGP1	1	111414313	111427777	1.84707	0.889754	-1.05376	0.27835	0.99965	Down
XLOC_003812	BCL2L15	1	113761831	113914086	0.630462	0.0812851	-2.95535	0.15235	0.99965	Down
XLOC_003827	NGF	1	115283033	115368072	12.4197	3.8297	-1.69733	0.03635	0.891341	Down
XLOC_004012	HIST2H2AA3,HIST2H2BE	1	149842187	149886652	2.92637	1.26297	-1.21229	0.20755	0.99965	Down
XLOC_004062	TDRKH	1	151755540	151794402	1.95214	0.741979	-1.39561	0.23575	0.99965	Down
XLOC_004076	FLG	1	152122533	152445456	14.2722	0.36232	-5.29979	5e-05	0.0106919	Down
XLOC_004106	S100A4	1	153543612	153550136	42.0993	11.503	-1.87179	0.01765	0.606734	Down
XLOC_004197	NES	1	156668762	156677397	1.13614	0.101624	-3.48282	0.00665	0.331156	Down
XLOC_004199	CRABP2	1	156699605	156705816	15.4929	1.00597	-3.94496	0.0023	0.173287	Down
XLOC_004316	RGS5	1	163111120	163355764	3.39411	1.36691	-1.31211	0.12665	0.99965	Down
XLOC_004497	RP11-181K3.4	1	183023459	183145592	0.539899	0.129762	-2.05683	0.49825	0.99965	Down
XLOC_004501	NCF2	1	183460873	183598246	0.707501	0.203639	-1.79672	0.35405	0.99965	Down
XLOC_004531	PTGS2	1	186671790	186680427	12.3107	2.73899	-2.16819	0.00195	0.157527	Down
XLOC_004591	ZNF281	1	200404939	200410056	16.353	6.80742	-1.26437	0.0142	0.524066	Down
XLOC_004648	KISS1	1	204190340	204196486	2.41175	1.14072	-1.08013	0.3037	0.99965	Down
XLOC_004746	FLVCR1-AS1	1	212852107	212858088	0.535325	0.173711	-1.62373	0.3497	0.99965	Down
XLOC_004771	RIMKLBP2	1	219086601	219212865	0.605962	0.168804	-1.84388	0.58535	0.99965	Down
XLOC_004843	LIN9	1	226231148	226309869	0.774895	0.34142	-1.18245	0.2167	0.99965	Down
XLOC_004938	SIPA1L2	1	232397964	232561558	3.36196	1.57603	-1.09301	0.11435	0.99965	Down
XLOC_004976	ERO1LB	1	236142504	236281985	0.566389	0.18188	-1.6388	0.37835	0.99965	Down
XLOC_004979	RP11-385F5.5	1	236517999	236604504	0.672299	0.325337	-1.04717	0.6617	0.99965	Down
XLOC_004999	RP11-567G24.3	1	240014347	240475189	2.69647	0.457533	-2.55913	0.48165	0.99965	Down
XLOC_005001	GREM2	1	240489572	240612149	14.0863	4.42835	-1.66946	0.00235	0.175238	Down
XLOC_005007	RGS7	1	240775513	241357230	0.722465	0.110267	-2.71192	0.0187	0.635319	Down
XLOC_005017	PLD5	1	242082985	242524696	3.26524	1.48952	-1.13235	0.16245	0.99965	Down
XLOC_005025	CEP170	1	243124427	243255348	30.4874	11.4233	-1.41623	0.0057	0.308118	Down
XLOC_005062	RP11-488L18.10	1	247187280	247188526	2.19057	0.889382	-1.30043	0.19345	0.99965	Down
XLOC_005141	NET1	10	5412550	5458463	18.2685	7.1346	-1.35645	0.0064	0.325393	Down
XLOC_005151	PFKFB3	10	6144933	6235545	15.0968	6.2706	-1.26756	0.0092	0.409105	Down
XLOC_005184	CELF2	10	11005295	11336675	0.556129	0.129967	-2.09727	0.0744	0.99965	Down
XLOC_005194	CAMK1D	10	12349481	12835545	5.48508	1.43118	-1.93831	0.0319	0.855589	Down
XLOC_005362	RP11-342D11.2	10	33177491	33336262	29.8119	11.377	-1.38977	0.46195	0.99965	Down
XLOC_005394	RP11-775A3.1	10	37883593	37884109	1.07532	0.474305	-1.18088	0.54965	0.99965	Down
XLOC_005529	PRKG1	10	50991357	52314128	3.00154	1.034	-1.53746	0.18425	0.99965	Down
XLOC_005535	DKK1	10	52314295	52318042	139.398	51.083	-1.4483	0.0173	0.598951	Down
XLOC_005558	LINC00844	10	58999625	59001543	0.543289	0.261127	-1.05697	0.52595	0.99965	Down
XLOC_005574	ZNF365	10	62374191	62672011	2.30326	0.746398	-1.62566	0.02005	0.65812	Down
XLOC_005604	MYPN	10	68106116	68212017	2.41592	1.08728	-1.15185	0.0991	0.99965	Down
XLOC_005637	COL13A1	10	69801930	69964275	2.73931	0.255205	-3.42409	0.0033	0.215181	Down
XLOC_005644	ADAMTS14	10	70672802	70762441	1.26895	0.248203	-2.35404	0.0139	0.516931	Down
XLOC_005797	ADIRF,FAM25A	10	86935539	87024732	52.1355	9.30541	-2.48612	0.00575	0.309669	Down
XLOC_005835	KIF20B	10	89701609	89774939	0.562204	0.258261	-1.12226	0.21985	0.99965	Down
XLOC_005864	EXOC6	10	92834712	93059493	2.67138	1.27771	-1.06403	0.3649	0.99965	Down
XLOC_005895	NPM1P26	10	96518108	96587452	0.886254	0.216814	-2.03126	0.4773	0.99965	Down
XLOC_005919	RP11-34A14.3	10	98247689	98268250	1.22271	0.416416	-1.55398	0.63095	0.99965	Down
XLOC_005929	DNMBP-AS1	10	99875576	100009919	0.793026	0.247125	-1.68213	0.603	0.99965	Down
XLOC_005932	PHBP9	10	100229666	100267680	0.512842	0.188728	-1.44221	0.64195	0.99965	Down
XLOC_005986	INA	10	103277162	103290351	0.802851	0.261905	-1.61609	0.11545	0.99965	Down
XLOC_006042	TECTB	10	112283734	112305035	0.431273	0.0415962	-3.37408	0.1476	0.99965	Down
XLOC_006049	RP11-57H14.3	10	112888734	112906111	0.847197	0.261165	-1.69773	0.4445	0.99965	Down
XLOC_006111	PPAPDC1A	10	120456953	120589855	55.6348	27.3742	-1.02317	0.0428	0.977757	Down
XLOC_006112	LINC01561	10	120597948	120600124	1.84329	0.315802	-2.54519	0.0244	0.743816	Down
XLOC_006187	RP11-45A17.4	10	131966454	131981931	0.997236	0.492004	-1.01926	0.71455	0.99965	Down
XLOC_006282	RP13-463N16.6	10	5594990	5596118	1.11379	0.155445	-2.841	0.1886	0.99965	Down
XLOC_006350	FAM107B	10	14518556	14774897	19.1561	8.4059	-1.18833	0.01675	0.588313	Down
XLOC_006362	C10orf111	10	15095384	15168693	1.03708	0.108291	-3.25955	0.45925	0.99965	Down
XLOC_006363	NMT2	10	15095384	15168693	53.2593	13.9928	-1.92835	0.0112	0.454914	Down
XLOC_006367	ITGA8	10	15513948	15720125	0.705321	0.225868	-1.6428	0.12765	0.99965	Down
XLOC_006401	SKIDA1	10	21513477	21525682	0.439878	0.139445	-1.65741	0.4813	0.99965	Down
XLOC_006498	RP11-479G22.8	10	32887254	32889311	9.67387	2.19725	-2.13839	0.00475	0.267712	Down
XLOC_006506	NRP1	10	33177491	33336262	85.5264	33.6441	-1.34601	0.0252	0.753867	Down
XLOC_006523	FZD8	10	35638248	35642278	8.64869	3.08428	-1.48755	0.0114	0.457921	Down
XLOC_006629	ARHGAP22	10	48446033	48656265	54.2955	23.9328	-1.18184	0.08605	0.99965	Down
XLOC_006682	IPMK	10	58191516	58267934	2.89588	1.40605	-1.04236	0.0848	0.99965	Down
XLOC_006724	HERC4	10	67921898	68075348	41.1072	19.152	-1.1019	0.02465	0.7483	Down
XLOC_006725	RP11-474D14.2	10	67921898	68075348	1.34448	0.485155	-1.47053	0.6064	0.99965	Down
XLOC_006767	UNC5B-AS1	10	71212569	71302864	1.51596	0.427978	-1.82463	0.53565	0.99965	Down
XLOC_006785	RPL17P50	10	73005832	73006595	2.22329	0.538082	-2.0468	0.1636	0.99965	Down
XLOC_006786	P4HA1	10	73007216	73096974	118.602	39.374	-1.59081	0.00555	0.301129	Down
XLOC_006908	MMRN2	10	86935539	87024732	5.90051	1.97637	-1.57799	0.1711	0.99965	Down
XLOC_006945	HTR7	10	90740822	90857698	1.91802	0.763648	-1.32864	0.1081	0.99965	Down
XLOC_007025	LOXL4	10	98247689	98268250	37.4141	15.4771	-1.27345	0.0127	0.491145	Down
XLOC_007039	DNMBP	10	99875576	100009919	11.0855	3.29767	-1.74916	0.0012	0.111141	Down
XLOC_007070	KCNIP2	10	101819077	101843920	0.442286	0.163093	-1.43928	0.184	0.99965	Down
XLOC_007121	RP11-549L6.3	10	110207604	110287365	0.555817	0.133451	-2.0583	0.50775	0.99965	Down
XLOC_007150	PPIAP19	10	114690142	114690634	0.647873	0.12478	-2.37633	0.34085	0.99965	Down
XLOC_007215	CPXM2	10	123706206	123940267	2.61202	0.385156	-2.76165	0.00345	0.221975	Down
XLOC_007240	ADAM12	10	126012380	126388455	58.1737	19.1917	-1.59988	0.01365	0.51288	Down
XLOC_007244	C10orf90	10	126424996	126670446	0.522214	0.218968	-1.25392	0.2072	0.99965	Down
XLOC_007284	RP11-122K13.12	10	133278629	133352683	0.918344	0.178798	-2.3607	0.50135	0.99965	Down
XLOC_007547	MICALCL	11	12276079	12359144	0.502677	0.250693	-1.00371	0.40565	0.99965	Down
XLOC_007667	RP11-115J23.1	11	28702614	29063821	0.726089	0.194222	-1.90244	0.2164	0.99965	Down
XLOC_007700	DEPDC7	11	33015863	33033582	6.37975	2.32363	-1.45712	0.0532	0.99965	Down
XLOC_007704	RP1-89D4.1	11	33237007	33237409	1.07365	0.339896	-1.65936	0.37915	0.99965	Down
XLOC_007708	KIAA1549L	11	33542071	33696701	6.59594	2.70476	-1.28608	0.02985	0.820508	Down
XLOC_007727	CD44	11	35138869	35232402	492.409	165.671	-1.57154	0.0392	0.929535	Down
XLOC_007980	AP001350.4	11	58627434	58628528	0.54629	0.179671	-1.60431	0.2633	0.99965	Down
XLOC_008000	AP000442.1	11	59616428	59668980	0.616625	0.2418	-1.35058	0.58115	0.99965	Down
XLOC_008057	ASRGL1	11	62336910	62393412	0.495216	0.108673	-2.18806	0.073	0.99965	Down
XLOC_008094	FERMT3	11	64206677	64234352	0.67183	0.180329	-1.89747	0.1701	0.99965	Down
XLOC_008105	CCDC88B	11	64340222	64357534	1.51119	0.631436	-1.25898	0.2825	0.99965	Down
XLOC_008161	CST6	11	66011840	66013505	7.05268	2.86037	-1.30197	0.13885	0.99965	Down
XLOC_008167	CNIH2	11	66268532	66289170	1.47289	0.37687	-1.96651	0.35025	0.99965	Down
XLOC_008241	ANO1	11	70078301	70189528	0.713845	0.164481	-2.11769	0.061	0.99965	Down
XLOC_008273	FOLR3	11	72114868	72139892	5.27705	1.79472	-1.55597	0.1675	0.99965	Down
XLOC_008293	ARAP1-AS2	11	72685068	72794168	0.611557	0.252899	-1.27392	0.68655	0.99965	Down
XLOC_008294	RPS12P20	11	72685068	72794168	0.789242	0.186437	-2.08178	0.51225	0.99965	Down
XLOC_008303	P2RY6	11	73264504	73298617	0.675498	0.18627	-1.85856	0.0375	0.908813	Down
XLOC_008567	BIRC3	11	102317449	102339403	2.4245	0.89626	-1.4357	0.0496	0.99965	Down
XLOC_008633	NCAM1	11	112959278	113278436	1.6458	0.115466	-3.83325	5e-05	0.0106919	Down
XLOC_008760	AP000783.1	11	123430736	123435710	3.26635	1.61887	-1.01269	0.3666	0.99965	Down
XLOC_008799	SLC37A2	11	125063066	125090312	0.500297	0.138649	-1.85135	0.0868	0.99965	Down
XLOC_008816	RP11-680F20.12	11	125950115	126063335	1.07951	0.493252	-1.12998	0.51525	0.99965	Down
XLOC_008865	NTM	11	131370477	132336822	98.449	30.3555	-1.69742	0.0046	0.262308	Down
XLOC_008925	DUSP8	11	1554043	1599184	2.54091	1.1387	-1.15796	0.1892	0.99965	Down
XLOC_009062	HPX	11	6431048	6442617	0.904546	0.355652	-1.34673	0.16335	0.99965	Down
XLOC_009065	CTD-2010I16.1	11	6474682	6593758	0.731192	0.238031	-1.6191	0.57295	0.99965	Down
XLOC_009090	NLRP10	11	7959423	7965426	1.4199	0.250035	-2.50558	0.06405	0.99965	Down
XLOC_009213	RP11-359E10.1	11	19350723	20121598	1.13958	0.303258	-1.90988	0.4348	0.99965	Down
XLOC_009229	SVIP	11	22813798	22945393	2.06098	0.831113	-1.31021	0.3034	0.99965	Down
XLOC_009248	BDNF	11	27506837	27877648	78.0545	26.7525	-1.54481	0.00495	0.275778	Down
XLOC_009252	KIF18A	11	28020619	28333507	1.67653	0.64013	-1.38904	0.27915	0.99965	Down
XLOC_009367	LRP4	11	46846411	46918642	0.954589	0.387725	-1.29985	0.13675	0.99965	Down
XLOC_009379	RP11-750H9.5	11	47383147	47416501	0.422632	0.164061	-1.36517	0.5922	0.99965	Down
XLOC_009494	YPEL4	11	57638023	57661868	0.806722	0.173366	-2.21825	0.11665	0.99965	Down
XLOC_009526	LPXN	11	58526870	58578220	29.4652	2.91786	-3.33603	5e-05	0.0106919	Down
XLOC_009527	CMB9-55A18.1	11	58579110	58625733	0.435543	0.21578	-1.01325	0.695	0.99965	Down
XLOC_009531	GLYATL2	11	58834064	58904215	0.527411	0.170527	-1.62893	0.1907	0.99965	Down
XLOC_009681	KCNK7	11	65576037	65650930	0.444437	0.212773	-1.06266	0.66615	0.99965	Down
XLOC_009699	RP11-755F10.1	11	66244839	66246239	0.548422	0.173435	-1.66089	0.44455	0.99965	Down
XLOC_010088	MMP1	11	102746967	102843803	5.66738	0.418633	-3.75892	0.0328	0.857712	Down
XLOC_010241	CMB9-94B1.2	11	117232624	117413268	1.33286	0.495173	-1.42852	0.61105	0.99965	Down
XLOC_010308	MIR100HG	11	122155421	122422871	233.412	79.694	-1.55034	0.24305	0.99965	Down
XLOC_010317	CLMP	11	123069864	123228277	179.743	77.945	-1.20541	0.05745	0.99965	Down
XLOC_010427	OPCML	11	132414976	133532519	2.01163	0.0138465	-7.18269	0.01385	0.516931	Down
XLOC_010503	NTF3	12	5432111	5521536	14.8704	7.37444	-1.01184	0.09385	0.99965	Down
XLOC_010505	CD9	12	6199714	6238271	47.844	10.5722	-2.17807	0.00015	0.0253622	Down
XLOC_010531	ENO2,LRRC23	12	6867118	6923698	59.8643	28.0995	-1.09115	0.34385	0.99965	Down
XLOC_010638	RP11-180M15.7	12	12715057	12722371	0.661815	0.213601	-1.63151	0.5918	0.99965	Down
XLOC_010643	GPRC5A	12	12890781	12917937	13.3464	3.00137	-2.15276	0.03475	0.880313	Down
XLOC_010694	PLEKHA5	12	19129751	19376400	6.39444	2.88052	-1.15049	0.04435	0.99965	Down
XLOC_010712	GOLT1B	12	21501780	21518408	50.5509	24.5833	-1.04006	0.10345	0.99965	Down
XLOC_010756	ARNTL2	12	27332853	27446625	10.5256	2.87401	-1.87276	0.01025	0.428291	Down
XLOC_010759	PPFIBP1	12	27523430	27695564	50.7647	22.4936	-1.17431	0.05395	0.99965	Down
XLOC_010760	REP15	12	27696387	27710770	3.6595	0.868205	-2.07554	0.07185	0.99965	Down
XLOC_010761	RP11-1060J15.9	12	27696387	27710770	3.202	0.831699	-1.94484	0.3898	0.99965	Down
XLOC_010762	RP11-1060J15.5	12	27696387	27710770	0.524105	0.203321	-1.3661	0.5982	0.99965	Down
XLOC_010782	TSPAN11	12	30926427	31006010	0.655416	0.313078	-1.06589	0.3336	0.99965	Down
XLOC_010973	SCN8A	12	51590265	51812864	11.4755	5.00918	-1.19592	0.19875	0.99965	Down
XLOC_010983	NR4A1	12	52022831	52059507	10.2069	4.57239	-1.15853	0.08685	0.99965	Down
XLOC_011007	KRT18	12	52897186	52952901	26.0055	3.26903	-2.99188	0.001	0.0956645	Down
XLOC_011012	IGFBP6	12	53097435	53102345	181.332	75.309	-1.26774	0.0174	0.599558	Down
XLOC_011121	NXPH4	12	57216794	57226449	8.40829	3.1029	-1.4382	0.0417	0.95943	Down
XLOC_011205	RP11-221N13.3	12	65278642	65642372	6.71206	2.69	-1.31915	0.58545	0.99965	Down
XLOC_011248	AC025263.3,MYRFL,RAB3IP	12	69738680	70354993	2.02246	0.935299	-1.11261	0.25535	0.99965	Down
XLOC_011280	GLIPR1	12	75480679	75511636	125.894	58.6397	-1.10227	0.339	0.99965	Down
XLOC_011285	RP11-290L1.3	12	76025446	76033932	35.4295	9.55636	-1.89042	0.35325	0.99965	Down
XLOC_011291	RP11-54A9.1	12	76259838	76305131	8.61551	3.63428	-1.24526	0.1854	0.99965	Down
XLOC_011362	RP11-823E8.3	12	89347231	89353271	5.53609	1.04439	-2.40621	0.17335	0.99965	Down
XLOC_011435	CFAP54	12	96489570	96875555	0.805955	0.299084	-1.43015	0.13245	0.99965	Down
XLOC_011472	DRAM1	12	101877350	102012130	26.754	10.3274	-1.37327	0.00655	0.328426	Down
XLOC_011495	EID3	12	104215778	104350305	0.520774	0.193424	-1.42889	0.5832	0.99965	Down
XLOC_011511	TCP11L2	12	106237876	106347015	7.53223	3.49876	-1.10623	0.5135	0.99965	Down
XLOC_011535	RP11-423G4.8	12	108778143	108857590	4.1527	2.06021	-1.01126	0.67345	0.99965	Down
XLOC_011550	ANKRD13A	12	109999185	110073686	46.0727	21.4216	-1.10485	0.0363	0.891341	Down
XLOC_011551	RP11-946P6.6	12	109999185	110073686	0.429951	0.104188	-2.04498	0.5035	0.99965	Down
XLOC_011627	LINC00173	12	116533421	116536518	0.74568	0.0585308	-3.67129	0.078	0.99965	Down
XLOC_011657	HSPB8	12	119178641	119221131	11.4644	5.57198	-1.0409	0.08685	0.99965	Down
XLOC_011664	AC004813.1	12	119918000	119918375	1.61594	0.571918	-1.49849	0.3964	0.99965	Down
XLOC_011950	PIANP	12	6693791	6700800	3.69188	0.467983	-2.97983	0.00295	0.19677	Down
XLOC_011960	ABC12-49244600F4.4	12	7080208	7122501	0.433284	0.141401	-1.61551	0.54515	0.99965	Down
XLOC_011997	MFAP5	12	8634366	8662888	104.986	20.7238	-2.34084	5e-05	0.0106919	Down
XLOC_012094	HIST4H4	12	14767998	14771131	0.552129	0.0997392	-2.46877	0.16785	0.99965	Down
XLOC_012166	BHLHE41	12	26120025	26833198	10.7397	4.01944	-1.41789	0.15085	0.99965	Down
XLOC_012188	PTHLH	12	27958083	27972705	4.09413	0.496757	-3.04295	0.0041	0.246356	Down
XLOC_012200	RP11-996F15.6	12	29149102	29381189	1.13231	0.509445	-1.15227	0.6997	0.99965	Down
XLOC_012211	DDX11-AS1	12	31020762	31104791	0.509342	0.0675054	-2.91556	0.2541	0.99965	Down
XLOC_012337	AMIGO2	12	47075706	47236662	52.1784	12.0461	-2.11489	5e-05	0.0106919	Down
XLOC_012383	RND1	12	48857144	48865898	0.475962	0.0426204	-3.48123	0.0827	0.99965	Down
XLOC_012437	GALNT6	12	51351246	51515763	2.25091	0.783266	-1.52293	0.02705	0.777044	Down
XLOC_012443	RP11-1100L3.8	12	52022831	52059507	9.43865	4.20837	-1.16532	0.39605	0.99965	Down
XLOC_012450	AC021066.1	12	52232519	52309163	145.462	69.2696	-1.07035	0.69765	0.99965	Down
XLOC_012454	KRT81	12	52232519	52309163	19.6981	2.3081	-3.09328	0.238	0.99965	Down
XLOC_012483	KRT8	12	52897186	52952901	13.8387	6.41924	-1.10824	0.2137	0.99965	Down
XLOC_012489	ITGB7	12	53157662	53207307	1.08958	0.500468	-1.12243	0.24485	0.99965	Down
XLOC_012538	ITGA7	12	55681545	55724705	18.9623	7.16946	-1.4032	0.036	0.891341	Down
XLOC_012548	RP11-973D8.4	12	55954104	55973317	2.43506	0.718554	-1.76079	0.3268	0.99965	Down
XLOC_012588	NDUFA4L2	12	57229326	57240715	21.4211	4.89149	-2.13068	0.3167	0.99965	Down
XLOC_012664	RP11-230G5.2	12	65278642	65642372	0.702825	0.289649	-1.27886	0.3289	0.99965	Down
XLOC_012666	RPSAP52	12	65758019	65966295	2.58623	1.23928	-1.06135	0.7326	0.99965	Down
XLOC_012687	RP11-335O4.3	12	67648337	67670919	2.07422	1.01627	-1.02928	0.56385	0.99965	Down
XLOC_012720	PTPRB	12	70468079	70637440	1.57535	0.206138	-2.93399	0.00495	0.275778	Down
XLOC_012721	PTPRR	12	70638072	70920843	0.86495	0.119248	-2.85865	0.0117	0.464835	Down
XLOC_012729	RP11-2H8.2	12	71754873	71800285	1.0687	0.165347	-2.69229	0.4966	0.99965	Down
XLOC_012751	RP11-585P4.5	12	75480679	75511636	0.642117	0.2226	-1.52838	0.5755	0.99965	Down
XLOC_012759	PHLDA1	12	76025446	76033932	45.0752	9.20955	-2.29113	5e-05	0.0106919	Down
XLOC_012765	E2F7	12	77021246	77065580	5.38569	0.809197	-2.73457	0.00015	0.0253622	Down
XLOC_012808	RASSF9	12	85800696	85836570	0.643381	0.259826	-1.30813	0.1589	0.99965	Down
XLOC_012823	DUSP6	12	89347231	89353271	28.5835	7.75012	-1.88289	0.0065	0.327047	Down
XLOC_012832	LUM	12	91102628	91111831	411.206	133.741	-1.62042	0.03075	0.838904	Down
XLOC_012923	GNPTAB	12	101745496	101830938	18.0331	6.3982	-1.49491	0.0017	0.141255	Down
XLOC_012936	IGF1	12	102120184	102480645	0.663315	0.283397	-1.22687	0.43525	0.99965	Down
XLOC_012952	RP11-818F20.5	12	104215778	104350305	0.868595	0.231473	-1.90784	0.49645	0.99965	Down
XLOC_012961	NUAK1	12	106063339	106140033	9.93752	4.7727	-1.05808	0.033	0.857712	Down
XLOC_012987	SELPLG	12	108622276	108641318	2.23758	1.07764	-1.05406	0.2437	0.99965	Down
XLOC_012995	USP30-AS1	12	109023088	109088026	0.603485	0.168126	-1.84378	0.58515	0.99965	Down
XLOC_013058	TBX3	12	114670253	114684164	10.7269	5.10519	-1.07119	0.04785	0.99965	Down
XLOC_013086	VSIG10	12	118063592	118145584	0.502793	0.159793	-1.65376	0.5473	0.99965	Down
XLOC_013119	RP11-18C24.8	12	120500734	120501090	0.444173	0.20849	-1.09114	0.5499	0.99965	Down
XLOC_013175	RP11-338K17.10	12	123712317	123761755	1.32358	0.534004	-1.30953	0.66025	0.99965	Down
XLOC_013178	DNAH10OS	12	123762187	124316024	1.1702	0.371776	-1.65425	0.6325	0.99965	Down
XLOC_013182	RP11-214K3.20	12	123762187	124316024	0.43215	0.104689	-2.04542	0.50655	0.99965	Down
XLOC_013229	RP11-21K12.2	12	128793190	128823983	0.51337	0.209511	-1.29297	0.6807	0.99965	Down
XLOC_013271	RP13-820C6.2	12	131949919	132081102	4.75056	1.8553	-1.35645	0.61415	0.99965	Down
XLOC_013274	RP13-977J11.5	12	132084282	132131639	1.82645	0.560198	-1.70503	0.5955	0.99965	Down
XLOC_013878	RP11-153I24.4	13	108251239	108308484	0.508842	0.161506	-1.65563	0.55145	0.99965	Down
XLOC_014034	SACS	13	23328822	23433728	7.09746	2.49817	-1.50643	0.00165	0.141133	Down
XLOC_014062	SHISA2	13	26044596	26051031	2.3053	0.109268	-4.39901	0.0255	0.755127	Down
XLOC_014164	TRPC4	13	37636635	37870425	3.50533	1.24233	-1.49651	0.05745	0.99965	Down
XLOC_014191	SUGT1P3,TPTE2P5	13	40822295	40921774	0.606493	0.0712864	-3.08879	0.0967	0.99965	Down
XLOC_014238	KCTD4	13	45120514	45284909	3.63047	0.469001	-2.95249	0.27625	0.99965	Down
XLOC_014317	THSD1	13	52377166	52406494	2.65689	1.01459	-1.38884	0.0922	0.99965	Down
XLOC_014340	DIAPH3	13	59665582	60163987	4.56908	1.99515	-1.1954	0.0442	0.998	Down
XLOC_014568	FAM155A	13	107163509	107866735	2.92402	1.16381	-1.3291	0.0232	0.717769	Down
XLOC_014591	LINC00346	13	110863986	110870251	0.554172	0.158998	-1.80133	0.09065	0.99965	Down
XLOC_014718	AE000658.22	14	21521080	21537216	1.10433	0.265225	-2.05788	0.55055	0.99965	Down
XLOC_014854	RP11-298I3.1	14	22929608	22982642	0.505957	0.0965911	-2.38905	0.40435	0.99965	Down
XLOC_014943	AKAP6	14	32329272	32837681	1.52004	0.36664	-2.05167	0.0279	0.786228	Down
XLOC_015100	RP11-368P15.3	14	53036744	53153282	2.11042	0.596101	-1.8239	0.58795	0.99965	Down
XLOC_015159	DACT1	14	58633966	58648321	21.5694	10.3989	-1.05256	0.0377	0.912139	Down
XLOC_015187	RHOJ	14	63204113	63293219	4.91438	1.80848	-1.44223	0.21295	0.99965	Down
XLOC_015210	PLEKHG3	14	64704101	64879883	3.03016	0.519491	-2.54422	0.0124	0.4847	Down
XLOC_015215	RP11-840I19.3	14	64914360	65102695	0.596622	0.145892	-2.03191	0.349	0.99965	Down
XLOC_015228	PLEKHH1	14	67447083	67600287	0.51623	0.228991	-1.17272	0.28035	0.99965	Down
XLOC_015340	RP11-7F17.8	14	77024542	77031572	1.73013	0.646362	-1.42047	0.4357	0.99965	Down
XLOC_015355	NRXN3	14	78242390	79868290	0.720179	0.113425	-2.66662	0.01085	0.443174	Down
XLOC_015483	BDKRB1,BDKRB2,RP11-404P21.8	14	96204678	96268967	21.1204	4.44513	-2.24834	0.0014	0.124892	Down
XLOC_015783	RP11-903H12.3	14	20684099	20707120	1.01525	0.388324	-1.3865	0.6531	0.99965	Down
XLOC_016061	RP11-248J18.3	14	50719762	50831121	0.512017	0.246645	-1.05376	0.65255	0.99965	Down
XLOC_016080	ERO1L	14	52639915	52695900	41.3471	19.038	-1.11891	0.0368	0.897547	Down
XLOC_016090	BMP4	14	53949735	53958761	10.8705	4.00097	-1.442	0.0259	0.75777	Down
XLOC_016125	RP11-999E24.3	14	57993544	57994525	1.19222	0.561559	-1.08614	0.362	0.99965	Down
XLOC_016155	HIF1A-AS2	14	61681040	61796428	2.99264	1.00181	-1.57881	0.56255	0.99965	Down
XLOC_016254	RP1-292L20.3	14	70906656	70907111	0.876943	0.420263	-1.06119	0.50165	0.99965	Down
XLOC_016264	DPF3	14	72619295	72894116	0.831214	0.248958	-1.73931	0.0545	0.99965	Down
XLOC_016301	CTD-2207P18.2	14	74614692	74616647	0.758876	0.164525	-2.20556	0.20965	0.99965	Down
XLOC_016304	RPS6KL1	14	74903953	74923396	2.75432	0.362985	-2.92372	0.0277	0.78352	Down
XLOC_016410	RP11-944C7.1	14	89124870	89954777	0.506876	0.161029	-1.65431	0.53695	0.99965	Down
XLOC_016454	SERPINA9	14	94430632	94479689	1.89089	0.450386	-2.06983	0.03955	0.933264	Down
XLOC_016493	CCDC85C	14	99481168	99604026	6.20829	3.03728	-1.03142	0.15035	0.99965	Down
XLOC_016780	RP11-603B24.2	15	22258137	22258848	0.775128	0.303084	-1.35472	0.3539	0.99965	Down
XLOC_016814	PWAR5,RP11-701H24.5	15	24823646	25439056	0.895001	0.404832	-1.14457	0.642	0.99965	Down
XLOC_016817	RP11-701H24.8	15	24823646	25439056	0.857179	0.354545	-1.27363	0.64275	0.99965	Down
XLOC_016961	RP11-540B6.3	15	30899479	30900327	1.02779	0.478182	-1.10392	0.52565	0.99965	Down
XLOC_017021	RP11-128A17.1	15	36889203	37101299	1.98443	0.13603	-3.86673	0.50725	0.99965	Down
XLOC_017037	C15orf54	15	38865321	39427195	0.573161	0.240254	-1.25438	0.34245	0.99965	Down
XLOC_017150	C15orf48	15	45430528	45586304	0.890331	0.438125	-1.023	0.40145	0.99965	Down
XLOC_017287	RPS3AP6	15	59768351	59769146	0.470136	0.131701	-1.83581	0.352	0.99965	Down
XLOC_017319	LACTB	15	63121799	63158021	39.086	18.2646	-1.0976	0.3397	0.99965	Down
XLOC_017367	IQCH	15	67201032	67530143	0.756197	0.190212	-1.99115	0.08955	0.99965	Down
XLOC_017387	PAQR5	15	69298946	69448427	0.995554	0.432244	-1.20365	0.46775	0.99965	Down
XLOC_017404	THSD4	15	71096951	71783383	5.76681	2.79411	-1.04538	0.05895	0.99965	Down
XLOC_017438	ISLR	15	74152799	74179226	94.6991	42.9278	-1.14144	0.029	0.806289	Down
XLOC_017445	UBL7-AS1	15	74461264	74516959	0.607013	0.115863	-2.38931	0.078	0.99965	Down
XLOC_017547	CEMIP	15	80779342	80989878	735.632	150.162	-2.29246	0.1052	0.99965	Down
XLOC_017595	RN7SL417P	15	84389728	84395903	1.25469	0.376069	-1.73826	0.2718	0.99965	Down
XLOC_017602	LINC00933	15	84507884	84580175	0.74747	0.155037	-2.2694	0.3949	0.99965	Down
XLOC_017608	ALPK3	15	84816679	84873482	0.796551	0.184484	-2.11027	0.05995	0.99965	Down
XLOC_017659	SEMA4B	15	90160603	90229679	8.13107	3.20375	-1.34369	0.00885	0.397185	Down
XLOC_017766	ALDH1A3	15	100849560	101086066	91.6946	2.73925	-5.06498	0.00025	0.0363525	Down
XLOC_017978	RP11-758N13.3	15	32765544	33194733	0.473888	0.221586	-1.09668	0.5895	0.99965	Down
XLOC_018042	BMF	15	40087889	40108892	2.89696	1.334	-1.11878	0.12785	0.99965	Down
XLOC_018126	FRMD5	15	43870760	44195252	3.14485	0.444101	-2.82403	0.00165	0.141133	Down
XLOC_018169	MYEF2	15	48120971	48178517	8.84583	4.23191	-1.06369	0.11325	0.99965	Down
XLOC_018324	RP11-244F12.3	15	63042631	63071915	3.59212	1.46575	-1.2932	0.5434	0.99965	Down
XLOC_018450	NPTN-IT1	15	73443157	73634134	0.798328	0.376978	-1.0825	0.72835	0.99965	Down
XLOC_018556	BCL2A1	15	79960888	79971446	0.458844	0.193332	-1.24692	0.42085	0.99965	Down
XLOC_018727	NR2F2-AS1,RP11-759A24.1	15	95990581	96340263	1.42227	0.484502	-1.55362	0.13075	0.99965	Down
XLOC_018780	RP11-66B24.4	15	100849560	101086066	29.9475	1.35443	-4.46667	0.0096	0.419123	Down
XLOC_018884	SYNGR3	16	1984206	1994275	1.07784	0.404584	-1.41363	0.4402	0.99965	Down
XLOC_018912	RP11-20I23.2	16	2475117	2531422	1.11365	0.426547	-1.38452	0.6348	0.99965	Down
XLOC_018940	IL32	16	3065296	3087100	7.24891	1.85568	-1.96582	0.0062	0.323133	Down
XLOC_019148	CTB-31N19.3	16	21597217	21657473	0.446703	0.0626293	-2.8344	0.4477	0.99965	Down
XLOC_019233	NPIPB8	16	28637653	28658682	0.617569	0.119149	-2.37383	0.30535	0.99965	Down
XLOC_019283	MYLPF	16	30370933	30377991	0.495967	0.231264	-1.10071	0.51205	0.99965	Down
XLOC_019314	RP11-196G11.4	16	31115753	31135762	0.784351	0.325374	-1.2694	0.6543	0.99965	Down
XLOC_019557	LPCAT2	16	55508997	55586670	11.6117	3.02902	-1.93865	0.00835	0.384232	Down
XLOC_019567	RP11-413H22.2	16	56361451	56425538	2.09559	0.961202	-1.12444	0.67955	0.99965	Down
XLOC_019622	NDRG4	16	58462845	58513628	7.19657	3.47758	-1.04922	0.0459	0.99965	Down
XLOC_019679	PLEKHG4	16	67277509	67326763	8.90971	4.22098	-1.0778	0.07495	0.99965	Down
XLOC_019752	CALB2	16	71358712	71390438	7.86567	1.57719	-2.31821	0.00255	0.180876	Down
XLOC_019874	CDH13	16	82626802	83807834	190.717	22.4097	-3.08924	5e-05	0.0106919	Down
XLOC_019903	RP11-680G10.1	16	85357462	85359449	2.04208	0.621435	-1.71637	0.37535	0.99965	Down
XLOC_019942	RP4-536B24.2	16	87830022	87869488	0.593287	0.229247	-1.37183	0.6131	0.99965	Down
XLOC_019983	CDK10	16	89680736	89701705	87.0921	39.332	-1.14684	0.4172	0.99965	Down
XLOC_020012	AL022341.3	16	636816	768865	0.568141	0.17953	-1.66202	0.5427	0.99965	Down
XLOC_020013	LA16c-349E10.1	16	636816	768865	1.08068	0.167218	-2.69213	0.40195	0.99965	Down
XLOC_020026	RP11-161M6.6	16	853633	981596	1.70051	0.784671	-1.11581	0.5682	0.99965	Down
XLOC_020250	COX6CP1	16	11851648	11916082	1.52045	0.653376	-1.21852	0.60715	0.99965	Down
XLOC_020296	MYH11	16	15643266	15857033	0.491123	0.192799	-1.34899	0.3247	0.99965	Down
XLOC_020501	RP11-347C12.3	16	30204315	30209071	0.488744	0.0274408	-4.15469	0.07245	0.99965	Down
XLOC_020525	RP11-146F11.1	16	30697706	30776307	0.51659	0.243902	-1.08271	0.6471	0.99965	Down
XLOC_020537	STX1B	16	30989255	31010628	3.62703	0.713113	-2.34659	0.0145	0.532436	Down
XLOC_020678	CTD-2600H12.2	16	48164951	48448402	0.592828	0.294696	-1.00838	0.73195	0.99965	Down
XLOC_020704	RP11-327F22.2	16	50735712	50740716	0.429335	0.127181	-1.75522	0.26835	0.99965	Down
XLOC_020724	RP11-467J12.4	16	53035689	53052873	0.566981	0.136028	-2.05939	0.3497	0.99965	Down
XLOC_020841	RP11-61A14.1	16	66802874	66873256	0.472857	0.150577	-1.65091	0.54665	0.99965	Down
XLOC_020843	RRAD	16	66921678	66925644	8.20946	1.17953	-2.79907	0.003	0.198286	Down
XLOC_020889	RP11-96D1.7	16	68245303	68261062	0.725778	0.312994	-1.21339	0.6172	0.99965	Down
XLOC_021026	MAF	16	79585842	79600714	2.15962	0.518204	-2.05919	0.0477	0.99965	Down
XLOC_021037	RP11-314O13.1	16	80828734	80892595	0.554936	0.245577	-1.17614	0.40275	0.99965	Down
XLOC_021060	RP11-483P21.2	16	82626802	83807834	2.00378	0.236549	-3.08251	0.23445	0.99965	Down
XLOC_021159	DBNDD1	16	90004864	90047773	3.06162	0.416696	-2.87723	0.0613	0.99965	Down
XLOC_021375	MYOCD	17	12665889	12991643	0.648749	0.0243095	-4.73807	0.0592	0.99965	Down
XLOC_021411	CTC-529I10.2	17	15976559	16353656	0.531387	0.195458	-1.4429	0.61315	0.99965	Down
XLOC_021430	MPRIP	17	17042544	17237188	0.5245	0.10167	-2.36706	0.46025	0.99965	Down
XLOC_021497	RNF112	17	19411124	19417276	1.06083	0.48875	-1.11803	0.267	0.99965	Down
XLOC_021526	USP32P3	17	20415546	20431008	0.711243	0.345576	-1.04134	0.3839	0.99965	Down
XLOC_021614	RP11-192H23.5	17	28455751	28645454	11.1254	4.6658	-1.25366	0.6429	0.99965	Down
XLOC_021697	CTC-542B22.2	17	31860898	31901765	0.655919	0.252542	-1.37699	0.62985	0.99965	Down
XLOC_021820	LINC00672	17	38925167	38928057	0.902981	0.439381	-1.03922	0.3306	0.99965	Down
XLOC_021853	CDC6	17	40287632	40304657	1.25213	0.421522	-1.57071	0.15195	0.99965	Down
XLOC_021914	WNK4	17	42780677	42798704	5.36498	0.913536	-2.55404	0.05365	0.99965	Down
XLOC_021940	FAM215A	17	43914432	43927388	0.430338	0.140458	-1.61533	0.33745	0.99965	Down
XLOC_021953	RUNDC3A	17	44299573	44318671	0.656219	0.26444	-1.31124	0.44345	0.99965	Down
XLOC_022026	HOXB-AS2	17	48540893	48606414	0.497738	0.12218	-2.02638	0.5107	0.99965	Down
XLOC_022039	IGF2BP1	17	48995265	49055650	1.41101	0.540458	-1.38447	0.13795	0.99965	Down
XLOC_022051	NGFR	17	49494222	49583827	2.40417	1.07448	-1.16189	0.30115	0.99965	Down
XLOC_022065	RP5-875H18.9	17	50094064	50094647	0.607814	0.196695	-1.62767	0.37925	0.99965	Down
XLOC_022068	SGCA	17	50163522	50181178	1.35318	0.0778648	-4.11924	0.0093	0.411037	Down
XLOC_022135	MSI2	17	57255850	57684685	14.4286	6.54265	-1.14098	0.11155	0.99965	Down
XLOC_022251	RP11-583F2.1	17	64927633	64934203	1.19251	0.189627	-2.65277	0.18225	0.99965	Down
XLOC_022255	RP11-160O5.1	17	65100811	65111058	1.10276	0.413728	-1.41436	0.3321	0.99965	Down
XLOC_022294	LINC00674	17	68101907	68115518	9.56898	4.73244	-1.01578	0.50955	0.99965	Down
XLOC_022324	SOX9	17	72021850	72237203	16.0407	3.50811	-2.19298	0.0006	0.0671123	Down
XLOC_022466	BAIAP2	17	81035121	81183164	8.95031	4.03581	-1.14908	0.0705	0.99965	Down
XLOC_022507	RP13-516M14.10	17	82228396	82273731	0.912392	0.355341	-1.36045	0.6085	0.99965	Down
XLOC_022516	RP13-20L14.10	17	82454272	82490537	0.680953	0.253232	-1.42709	0.61645	0.99965	Down
XLOC_022527	AC144831.3	17	83098376	83098987	2.75294	1.29261	-1.09068	0.3019	0.99965	Down
XLOC_022656	NLRP1	17	5499426	5619424	15.4851	4.14613	-1.90104	0.0023	0.173287	Down
XLOC_022674	RP11-589P10.5	17	6853860	7019659	1.66789	0.445502	-1.90452	0.53595	0.99965	Down
XLOC_022678	ASGR1	17	7173430	7179564	0.945698	0.269128	-1.81309	0.1226	0.99965	Down
XLOC_022697	AC113189.5	17	7561874	7633383	5.3818	1.8437	-1.54549	0.3493	0.99965	Down
XLOC_022716	LINC00324	17	8220641	8224043	2.35935	0.810549	-1.54142	0.08705	0.99965	Down
XLOC_022745	MYH3	17	10628525	10657309	1.55602	0.253781	-2.6162	0.0985	0.99965	Down
XLOC_022891	SRP68P3	17	20415546	20431008	0.473888	0.221586	-1.09668	0.44395	0.99965	Down
XLOC_022972	CTB-96E2.2,SEBOX,VTN	17	28357580	28407197	2.1881	0.137235	-3.99496	0.10965	0.99965	Down
XLOC_022979	ALDOC	17	28455751	28645454	16.1085	6.02728	-1.41825	0.3067	0.99965	Down
XLOC_022980	RP11-192H23.8	17	28455751	28645454	0.433973	0.138786	-1.64474	0.5463	0.99965	Down
XLOC_023113	SLFN13	17	35435095	35448837	0.741786	0.102532	-2.85492	0.0604	0.99965	Down
XLOC_023141	TBC1D3B,TBC1D3F,TBC1D3H,TBC1D3I	17	36116176	36439566	3.11863	1.42984	-1.12506	0.3167	0.99965	Down
XLOC_023211	NR1D1	17	40019096	40100725	12.9371	5.59861	-1.20837	0.2616	0.99965	Down
XLOC_023235	KRT23	17	40921429	40975926	0.708689	0.0661781	-3.42073	0.0069	0.337821	Down
XLOC_023242	KRTAP1-5	17	41026025	41027202	138.942	38.3036	-1.85893	0.00065	0.0700122	Down
XLOC_023245	KRTAP1-1	17	41040558	41041461	18.5721	1.46544	-3.66373	0.0012	0.111141	Down
XLOC_023248	KRTAP2-3	17	41059239	41060114	60.1806	5.0353	-3.57915	0.00015	0.0253622	Down
XLOC_023265	KRT31,KRT33B,KRT34	17	41363493	41397592	70.3014	11.105	-2.66235	5e-05	0.0106919	Down
XLOC_023274	KRT15	17	41513742	41522529	2.07698	0.13345	-3.96011	0.03365	0.864253	Down
XLOC_023275	KRT19	17	41523616	41528308	23.0779	0.810069	-4.83233	0.0003	0.0411538	Down
XLOC_023280	KRT17	17	41619436	41624842	3.45892	1.72891	-1.00046	0.20885	0.99965	Down
XLOC_023348	ETV4	17	43483864	43610338	2.43493	1.12937	-1.10837	0.38315	0.99965	Down
XLOC_023356	MPP2	17	43875356	43909711	2.64946	0.921507	-1.52363	0.01945	0.650167	Down
XLOC_023465	HOXB8	17	48607226	48634932	0.703024	0.0702245	-3.32353	0.2977	0.99965	Down
XLOC_023694	SMURF2	17	64499615	64662068	54.3682	16.8257	-1.69209	0.3327	0.99965	Down
XLOC_023724	SH3GL1P3	17	68125776	68152468	0.608251	0.108807	-2.4829	0.52675	0.99965	Down
XLOC_023750	AC005152.3,SOX9-AS1	17	72021850	72237203	0.648107	0.26421	-1.29455	0.08785	0.99965	Down
XLOC_023823	QRICH2	17	76274048	76307680	0.888468	0.342691	-1.37441	0.19435	0.99965	Down
XLOC_023827	RHBDF2	17	76470890	76501790	1.9302	0.810888	-1.25118	0.10355	0.99965	Down
XLOC_023857	DNAH17	17	78378639	78577394	0.478704	0.20337	-1.23503	0.4848	0.99965	Down
XLOC_024056	RP11-674N23.4	18	8695855	8832778	0.523685	0.170161	-1.6218	0.59035	0.99965	Down
XLOC_024166	GATA6	18	22169442	22205229	17.022	1.76166	-3.27239	5e-05	0.0106919	Down
XLOC_024207	AC015933.2	18	27950965	28177446	2.92926	1.1796	-1.31224	0.62425	0.99965	Down
XLOC_024234	RP11-326K13.4	18	31829172	31953136	1.07409	0.414044	-1.37526	0.41025	0.99965	Down
XLOC_024296	SLC14A1	18	45212994	45752520	234.907	32.1548	-2.86898	5e-05	0.0106919	Down
XLOC_024298	SIGLEC15	18	45825511	45844080	1.8201	0.537957	-1.75845	0.07265	0.99965	Down
XLOC_024407	PMAIP1	18	59899947	59904306	5.10715	2.42625	-1.07379	0.125	0.99965	Down
XLOC_024428	TNFRSF11A	18	62325286	62391292	0.921938	0.147561	-2.64336	0.0163	0.576687	Down
XLOC_024443	SERPINB7	18	63752934	63805376	4.71633	0.775605	-2.60427	0.0043	0.25403	Down
XLOC_024444	SERPINB10,SERPINB2	18	63871691	63936111	18.8704	1.81751	-3.37609	5e-05	0.0106919	Down
XLOC_024557	COLEC12	18	316736	500722	21.7686	1.9047	-3.51461	5e-05	0.0106919	Down
XLOC_024562	TYMSOS	18	596987	712676	0.436163	0.122357	-1.83378	0.55535	0.99965	Down
XLOC_024607	EPB41L3	18	5392380	5630700	5.62982	2.02671	-1.47395	0.0038	0.235131	Down
XLOC_024706	ZNF519	18	14057456	14132490	1.41541	0.669877	-1.07925	0.2348	0.99965	Down
XLOC_024753	RP11-627G18.1	18	22169442	22205229	9.1624	0.959288	-3.25569	0.2132	0.99965	Down
XLOC_024808	CDH2	18	27950965	28177446	121.887	46.3181	-1.39589	0.02125	0.679113	Down
XLOC_024886	RP11-116O18.3	18	45212994	45752520	3.51697	0.429374	-3.03403	0.2736	0.99965	Down
XLOC_024887	EPG5	18	45847608	45967274	31.5779	14.7234	-1.10081	0.07175	0.99965	Down
XLOC_024888	PSTPIP2	18	45983535	46072272	7.57669	3.63776	-1.05851	0.055	0.99965	Down
XLOC_024979	RP11-706P11.2	18	57588610	57589091	0.536392	0.128969	-2.05626	0.3784	0.99965	Down
XLOC_024981	ATP8B1	18	57630301	57803101	40.6716	8.75902	-2.21518	0.0001	0.0191329	Down
XLOC_024988	RP11-1151B14.5	18	58481246	58628957	0.772295	0.302001	-1.3546	0.62475	0.99965	Down
XLOC_025044	RP11-421N8.1	18	68277801	68278243	1.53037	0.439193	-1.80096	0.26615	0.99965	Down
XLOC_025129	CTD-3113P16.5	19	305572	344807	2.80867	1.08724	-1.36922	0.5153	0.99965	Down
XLOC_025182	AC005943.6	19	1573595	1605490	25.2565	3.28653	-2.94201	0.43625	0.99965	Down
XLOC_025247	CTB-50L17.7	19	4402661	4457822	0.903584	0.327893	-1.46244	0.6082	0.99965	Down
XLOC_025248	CTB-50L17.8	19	4402661	4457822	0.476735	0.225505	-1.08003	0.7022	0.99965	Down
XLOC_025249	CTB-50L17.9	19	4402661	4457822	0.491188	0.118516	-2.05119	0.49665	0.99965	Down
XLOC_025349	CTC-543D15.8	19	9538732	9539734	0.565225	0.119764	-2.23863	0.25175	0.99965	Down
XLOC_025438	CTD-2659N19.2	19	12688052	12696643	0.784586	0.354412	-1.1465	0.59025	0.99965	Down
XLOC_025442	Metazoa_SRP	19	12763002	12874951	0.686073	0.312994	-1.13223	0.606	0.99965	Down
XLOC_025536	CTD-3222D19.12	19	16479056	16660442	0.68822	0.308788	-1.15625	0.67955	0.99965	Down
XLOC_025588	GDF15	19	18374730	18389176	159.603	76.3294	-1.06417	0.03615	0.891341	Down
XLOC_025713	CTB-92J24.2	19	23914875	23957930	0.443374	0.0627498	-2.82084	0.13955	0.99965	Down
XLOC_025718	CTC-459F4.9	19	27684579	27984984	0.90072	0.438642	-1.03803	0.6577	0.99965	Down
XLOC_025738	CTC-448F2.7	19	29915861	29917830	0.468638	0.209432	-1.16199	0.33555	0.99965	Down
XLOC_025906	RN7SL566P	19	39342395	39385710	0.645225	0.295863	-1.12487	0.60775	0.99965	Down
XLOC_025979	CTC-378H22.2	19	42086109	42196585	0.425081	0.0234511	-4.18001	0.2351	0.99965	Down
XLOC_026020	CEACAM19,PVR	19	44537057	44718759	103.407	42.1992	-1.29305	0.0269	0.77456	Down
XLOC_026021	AC092066.1	19	44537057	44718759	11.617	4.55263	-1.35146	0.4124	0.99965	Down
XLOC_026209	ZNF175	19	51571297	51592508	12.9152	2.48456	-2.37801	0.0061	0.321377	Down
XLOC_026222	CTC-471J1.11	19	52031378	52095765	0.508099	0.0710559	-2.83808	0.49635	0.99965	Down
XLOC_026236	ZNF578	19	52453575	52512342	0.801491	0.386545	-1.05205	0.4723	0.99965	Down
XLOC_026238	ZNF137P	19	52588504	52690496	0.805526	0.322799	-1.3193	0.67605	0.99965	Down
XLOC_026253	ZNF845	19	53330674	53430413	2.2986	0.965895	-1.25082	0.2718	0.99965	Down
XLOC_026319	CACNG7	19	53909334	53943941	0.540664	0.0884624	-2.6116	0.17925	0.99965	Down
XLOC_026364	CTD-2587H24.5	19	55151766	55180441	0.572071	0.0567258	-3.33412	0.20325	0.99965	Down
XLOC_026428	AC003005.2	19	57477648	57482996	0.486919	0.234973	-1.05119	0.5139	0.99965	Down
XLOC_026450	RPS15AP36	19	58216179	58216561	0.781872	0.184807	-2.08091	0.3784	0.99965	Down
XLOC_026507	LLNLR-307A6.1	19	1383526	1396467	0.598501	0.278737	-1.10245	0.68475	0.99965	Down
XLOC_026512	PCSK4	19	1481427	1497927	0.535024	0.179089	-1.57893	0.22605	0.99965	Down
XLOC_026543	RN7SL121P	19	2511218	2702709	0.777639	0.351514	-1.14552	0.56275	0.99965	Down
XLOC_026550	AC006130.3	19	2841434	2860484	0.651557	0.105205	-2.63069	0.5242	0.99965	Down
XLOC_026569	TBXA2R	19	3594505	3606840	1.26945	0.417885	-1.60303	0.12975	0.99965	Down
XLOC_026596	SEMA6B	19	4542592	4559808	0.444332	0.0330715	-3.74798	0.07905	0.99965	Down
XLOC_026627	CTB-180A7.6	19	6379568	6412404	0.451044	0.144127	-1.64593	0.555	0.99965	Down
XLOC_026654	PEX11G	19	7476874	7521026	0.660131	0.324508	-1.0245	0.62385	0.99965	Down
XLOC_026676	RAB11B-AS1	19	7958578	8489114	1.47112	0.49153	-1.58156	0.47725	0.99965	Down
XLOC_026889	CTD-2278I10.4	19	17292130	17334829	0.885302	0.243799	-1.86048	0.5712	0.99965	Down
XLOC_026903	UNC13A	19	17601327	17688365	1.40646	0.269777	-2.38223	0.01655	0.584111	Down
XLOC_026912	PDE4C	19	18204729	18255419	0.896013	0.180754	-2.30949	0.0251	0.753867	Down
XLOC_026927	CERS1	19	18868544	18896727	0.583931	0.0884012	-2.72366	0.11815	0.99965	Down
XLOC_026973	RPL7AP10	19	21142023	21196053	0.473145	0.132528	-1.83599	0.5819	0.99965	Down
XLOC_027196	GGN	19	38384264	38388082	0.877539	0.363789	-1.27036	0.37225	0.99965	Down
XLOC_027292	POU2F2	19	42086109	42196585	1.66174	0.257544	-2.6898	0.00775	0.365886	Down
XLOC_027296	PAFAH1B3	19	42297032	42310821	2.68019	1.11956	-1.25941	0.2177	0.99965	Down
XLOC_027317	PSG9	19	43211790	43269530	0.733978	0.236563	-1.63351	0.119	0.99965	Down
XLOC_027328	CADM4	19	43622367	43639839	3.95619	1.80143	-1.13497	0.1917	0.99965	Down
XLOC_027329	PLAUR	19	43646094	43670547	88.16	35.1903	-1.32495	0.00725	0.35024	Down
XLOC_027332	KCNN4	19	43766532	43781257	11.8045	1.86373	-2.66307	0.00095	0.0914831	Down
XLOC_027432	LIG1	19	48115444	48170603	3.1509	1.44942	-1.12029	0.15485	0.99965	Down
XLOC_027439	CTC-273B12.5	19	48445772	48482314	0.49111	0.150462	-1.70664	0.43565	0.99965	Down
XLOC_027445	CA11	19	48637941	48682245	3.19974	0.324879	-3.29998	0.01405	0.521176	Down
XLOC_027466	CGB7,NTF4	19	49054274	49065076	0.51606	0.165482	-1.64087	0.1837	0.99965	Down
XLOC_027511	SHANK1,SYT3	19	50621306	50719450	9.35782	4.1772	-1.16364	0.0981	0.99965	Down
XLOC_027597	CTD-2224J9.7	19	53330674	53430413	0.670504	0.257939	-1.37822	0.63925	0.99965	Down
XLOC_027616	OSCAR	19	54094667	54102692	0.727426	0.21096	-1.78583	0.065	0.99965	Down
XLOC_027663	IL11	19	55364388	55370463	7.72898	0.807756	-3.25829	0.00265	0.185258	Down
XLOC_027939	KCNK3	2	26692689	26733420	0.991247	0.0943846	-3.39262	0.0643	0.99965	Down
XLOC_027960	GCKR	2	27496841	27523684	1.42344	0.556617	-1.35462	0.23625	0.99965	Down
XLOC_027999	CTC-336P14.1	2	31865059	32039812	1.18415	0.272928	-2.11726	0.51405	0.99965	Down
XLOC_028039	QPCT	2	37344573	37373322	35.0233	10.7919	-1.69837	0.0015	0.132191	Down
XLOC_028108	RP11-333I13.1	2	46777782	46780245	0.938028	0.347565	-1.43235	0.1872	0.99965	Down
XLOC_028109	LINC01118,LINC01119	2	46816667	46859007	12.6648	4.79879	-1.40008	0.0468	0.99965	Down
XLOC_028189	PAPOLG	2	60756229	60802085	3.78228	1.75579	-1.10714	0.1169	0.99965	Down
XLOC_028238	AC007318.5	2	65205107	65205988	0.945356	0.40647	-1.21771	0.37105	0.99965	Down
XLOC_028307	RP11-44N22.3	2	72942035	73156721	0.652312	0.165744	-1.97661	0.46295	0.99965	Down
XLOC_028398	AC093162.5	2	85315040	85316529	1.25634	0.306937	-2.03321	0.177	0.99965	Down
XLOC_028538	ARID5A	2	96536742	96552638	3.30548	1.5594	-1.08387	0.17625	0.99965	Down
XLOC_028635	AC012360.6	2	105357711	105438513	1.04717	0.478807	-1.12898	0.54185	0.99965	Down
XLOC_028677	RGPD5	2	109792757	109857695	1.9371	0.733319	-1.40139	0.1042	0.99965	Down
XLOC_028760	AC009404.2	2	117833936	117841658	0.752064	0.242456	-1.63313	0.27145	0.99965	Down
XLOC_028776	PTPN4	2	119759630	119983818	6.25509	2.79829	-1.16049	0.2696	0.99965	Down
XLOC_028784	INHBB	2	120346142	120351808	20.9573	5.22126	-2.00498	0.00095	0.0914831	Down
XLOC_029003	GALNT5	2	157257597	157314211	96.4659	40.7747	-1.24235	0.04675	0.99965	Down
XLOC_029099	ITGA6	2	172427353	172608669	11.4078	5.62163	-1.02096	0.0671	0.99965	Down
XLOC_029100	PDK1	2	172427353	172608669	5.04102	1.61486	-1.6423	0.1562	0.99965	Down
XLOC_029102	RAPGEF4	2	172677140	173052893	0.831447	0.0915355	-3.18322	0.0035	0.223217	Down
XLOC_029218	ANKAR	2	189674289	189765556	0.691704	0.272903	-1.34177	0.3742	0.99965	Down
XLOC_029223	HNRNPCP2	2	189879608	190371665	0.649934	0.290336	-1.16257	0.68955	0.99965	Down
XLOC_029252	AC020571.3	2	196194369	196593692	0.705058	0.033542	-4.3937	0.15195	0.99965	Down
XLOC_029324	RP11-686O6.1	2	202336738	202337200	0.57081	0.13691	-2.05978	0.3784	0.99965	Down
XLOC_029365	ZDBF2	2	206274662	206314428	1.7861	0.891348	-1.00275	0.09845	0.99965	Down
XLOC_029366	AC017081.1	2	206355738	206356119	2.35649	0.742474	-1.66623	0.25945	0.99965	Down
XLOC_029367	ADAM23	2	206443538	206621130	1.1946	0.37971	-1.65356	0.09985	0.99965	Down
XLOC_029386	IDH1-AS1	2	208236226	208266074	0.567031	0.262159	-1.11298	0.6122	0.99965	Down
XLOC_029445	AC007563.5	2	216672104	216994079	11.7101	0.423986	-4.7876	0.3246	0.99965	Down
XLOC_029662	ASB1	2	238426741	238452250	37.5046	16.971	-1.144	0.0915	0.99965	Down
XLOC_029795	CYS1	2	10056779	10080944	0.854671	0.424887	-1.00829	0.2975	0.99965	Down
XLOC_029848	LINC01376	2	18986450	19346748	0.616295	0.230575	-1.41838	0.3149	0.99965	Down
XLOC_029849	OSR1	2	19351484	19358653	11.2343	3.67168	-1.6134	0.01295	0.496849	Down
XLOC_029857	SDC1	2	20200796	20225433	7.34226	2.23666	-1.71488	0.0064	0.325393	Down
XLOC_030017	RP11-288C18.1	2	36839921	36842539	1.13718	0.308564	-1.88182	0.0756	0.99965	Down
XLOC_030200	NONOP2	2	60936818	60938049	0.515688	0.196035	-1.39539	0.3325	0.99965	Down
XLOC_030226	AC009501.4	2	62673850	63048640	0.502094	0.23741	-1.08058	0.6249	0.99965	Down
XLOC_030308	TGFA	2	70447279	70554193	1.01776	0.0778147	-3.70921	0.00815	0.378623	Down
XLOC_030325	CYP26B1	2	72129237	72148038	1.68204	0.774779	-1.11835	0.1765	0.99965	Down
XLOC_030551	LINC00342	2	95807117	95816215	0.492613	0.19226	-1.3574	0.2406	0.99965	Down
XLOC_030579	AC159540.1	2	97416164	97434847	0.918447	0.419235	-1.13144	0.14715	0.99965	Down
XLOC_030677	MALL	2	110083869	110116566	9.77774	0.145635	-6.06908	0.0027	0.18785	Down
XLOC_030703	RGPD8	2	112370091	112434488	0.602642	0.280488	-1.10336	0.1725	0.99965	Down
XLOC_030740	RP11-19E11.1	2	118833699	118835110	0.949014	0.0921283	-3.36471	0.17995	0.99965	Down
XLOC_030875	LYPD1	2	132416573	132671579	91.1573	0.817971	-6.80017	5e-05	0.0106919	Down
XLOC_030876	NCKAP5	2	132671798	133568463	3.95322	0.96928	-2.02804	0.0143	0.526421	Down
XLOC_030883	CCNT2-AS1	2	134735463	134959342	0.747842	0.350187	-1.09461	0.60825	0.99965	Down
XLOC_030963	RND3	2	150468194	150539011	90.7809	44.1291	-1.04066	0.035	0.882036	Down
XLOC_030995	NR4A2	2	156324431	156342348	3.72431	0.739434	-2.33248	0.00375	0.233029	Down
XLOC_031001	ERMN	2	157318624	157327713	2.85046	0.155516	-4.19606	0.00045	0.0545287	Down
XLOC_031017	BAZ2B	2	159318978	159617082	12.3948	4.28346	-1.53289	0.0531	0.99965	Down
XLOC_031019	AC009961.3	2	159670707	159712435	1.31624	0.381259	-1.78758	0.30715	0.99965	Down
XLOC_031036	DPP4	2	161992240	162075169	8.96948	0.730896	-3.61728	5e-05	0.0106919	Down
XLOC_031053	GALNT3	2	165747590	165794682	7.01419	2.64991	-1.40433	0.03065	0.837747	Down
XLOC_031098	AC078883.3	2	172427353	172608669	1.36157	0.117831	-3.53048	0.30225	0.99965	Down
XLOC_031099	AC093818.1	2	172427353	172608669	1.14673	0.482016	-1.25037	0.49815	0.99965	Down
XLOC_031237	RP11-647K16.1	2	190408354	190534722	0.639955	0.152748	-2.06681	0.54335	0.99965	Down
XLOC_031244	STAT4	2	191021525	191151596	5.3743	1.58293	-1.76348	0.004	0.243364	Down
XLOC_031250	SDPR	2	191834301	192195709	0.800001	0.109895	-2.86387	0.02635	0.767765	Down
XLOC_031270	HECW2	2	196194369	196593692	7.73922	1.35492	-2.51398	0.00275	0.190418	Down
XLOC_031322	AC079354.5	2	202073254	202197862	0.870108	0.267749	-1.70031	0.2133	0.99965	Down
XLOC_031428	IGFBP5	2	216672104	216994079	55.5819	5.8269	-3.25382	5e-05	0.0106919	Down
XLOC_031436	DIRC3	2	217282738	217756593	0.536807	0.101123	-2.4083	0.0399	0.935784	Down
XLOC_031447	USP37	2	218419091	218568361	1.63217	0.730697	-1.15945	0.12015	0.99965	Down
XLOC_031471	PTPRN	2	219289622	219309648	0.77876	0.345177	-1.17384	0.18295	0.99965	Down
XLOC_031510	AP1S3	2	223751685	223838027	1.90807	0.464751	-2.03759	0.0629	0.99965	Down
XLOC_031514	SERPINE2	2	223975111	224039319	1328.89	636.863	-1.06117	0.26045	0.99965	Down
XLOC_031616	AC112721.2	2	237428919	237434822	1.12646	0.545023	-1.04741	0.43945	0.99965	Down
XLOC_031623	PER2	2	238231683	238290102	1.62164	0.684764	-1.24377	0.08585	0.99965	Down
XLOC_031625	AC016999.2	2	238426741	238452250	1.18165	0.283048	-2.06169	0.50585	0.99965	Down
XLOC_031666	PASK	2	241106098	241183652	0.956009	0.387125	-1.30422	0.3303	0.99965	Down
XLOC_031744	PRNP	20	4686235	4701590	218.588	86.3098	-1.34062	0.03115	0.84327	Down
XLOC_031768	BMP2	20	6767663	6780280	1.05775	0.269603	-1.97209	0.0668	0.99965	Down
XLOC_032210	DOK5	20	54475596	54651171	6.92081	2.8643	-1.27276	0.06295	0.99965	Down
XLOC_032326	RTEL1,RTEL1-TNFRSF6B,TNFRSF6B	20	63657809	63743505	10.6574	4.7315	-1.17148	0.383	0.99965	Down
XLOC_032403	ADRA1D	20	4220630	4249074	2.09432	0.328201	-2.67383	0.01605	0.570619	Down
XLOC_032520	DZANK1	20	18383366	18484643	1.30599	0.470407	-1.47316	0.28915	0.99965	Down
XLOC_032549	RPS15AP1	20	21125982	21246622	1.12603	0.533474	-1.07775	0.67445	0.99965	Down
XLOC_032651	DUSP15	20	31847636	31952092	3.11834	0.88037	-1.8246	0.16805	0.99965	Down
XLOC_032749	TGM2	20	38033545	38166578	232.292	111.051	-1.06471	0.1568	0.99965	Down
XLOC_033014	EEF1A2	20	63488012	63499315	1.12151	0.291447	-1.94414	0.08085	0.99965	Down
XLOC_033019	STMN3	20	63639704	63653427	7.41513	1.68869	-2.13457	0.0047	0.265925	Down
XLOC_033052	CH507-254M2.3	21	6721811	6725209	0.439048	0.0961748	-2.19065	0.24415	0.99965	Down
XLOC_033163	MIR99AHG	21	16070521	16627397	4.44251	1.50985	-1.55697	0.1225	0.99965	Down
XLOC_033177	AP000432.1	21	17593652	17633199	0.954308	0.366952	-1.37886	0.4664	0.99965	Down
XLOC_033241	MAP3K7CL	21	29077470	29175889	15.762	2.23598	-2.81747	0.00675	0.334989	Down
XLOC_033242	BACH1	21	29193479	29940033	15.1842	5.21059	-1.54306	0.00215	0.165413	Down
XLOC_033245	AP000240.9	21	29193479	29940033	0.443105	0.141495	-1.64689	0.5422	0.99965	Down
XLOC_033318	AP000695.6	21	36430359	36576569	0.697315	0.285625	-1.28769	0.55865	0.99965	Down
XLOC_033319	AP000695.4	21	36430359	36576569	2.72521	0.716498	-1.92733	0.20125	0.99965	Down
XLOC_033343	AF129408.17	21	39184175	39323218	1.59384	0.456616	-1.80346	0.57485	0.99965	Down
XLOC_033472	CH507-145C22.3,CH507-154B10.1	21	6630181	6670695	0.468473	0.1216	-1.94582	0.1314	0.99965	Down
XLOC_033535	NRIP1	21	14818842	15065000	11.0907	4.32723	-1.35784	0.0075	0.357566	Down
XLOC_033612	ADAMTS1	21	26835746	26845409	304.77	72.5942	-2.06979	0.00685	0.337647	Down
XLOC_033613	ADAMTS5	21	26889375	26966513	4.5623	1.69422	-1.42914	0.01215	0.478789	Down
XLOC_033712	RCAN1	21	34513141	34615142	156.651	45.5283	-1.78272	0.0024	0.176255	Down
XLOC_033747	ERG	21	38380026	38661780	0.917547	0.260064	-1.81892	0.0624	0.99965	Down
XLOC_033763	B3GALT5-AS1	21	39556441	39726085	0.9574	0.14041	-2.76947	0.30715	0.99965	Down
XLOC_033774	RIPK4	21	41739368	41767106	0.487961	0.0452363	-3.43121	0.0588	0.99965	Down
XLOC_033868	DSTNP1	21	46635166	46665124	1.9778	0.135596	-3.86651	0.46925	0.99965	Down
XLOC_033953	AC000068.9	22	19330697	19479215	2.4274	0.617701	-1.97443	0.53255	0.99965	Down
XLOC_034002	TMEM191C	22	21466422	21471269	0.525612	0.154625	-1.76523	0.09515	0.99965	Down
XLOC_034188	CTA-445C9.14	22	26512536	26514568	0.526306	0.157546	-1.74013	0.1886	0.99965	Down
XLOC_034191	MIAT,MIATNB,MIAT_exon1,MIAT_exon5_1,MIAT_exon5_2,MIAT_exon5_3	22	26646427	26780207	4.11238	1.74477	-1.23693	0.11945	0.99965	Down
XLOC_034213	HSCB	22	28687742	28757515	11.0494	5.42428	-1.02646	0.24	0.99965	Down
XLOC_034224	NEFH	22	29480229	29491390	1.27318	0.512168	-1.31374	0.13945	0.99965	Down
XLOC_034236	RP1-102K2.8	22	30239193	30246998	1.68265	0.329767	-2.35121	0.46655	0.99965	Down
XLOC_034249	OSBP2	22	30693781	30907824	2.11878	0.959613	-1.14271	0.14695	0.99965	Down
XLOC_034313	RASD2	22	35540867	35554001	1.32758	0.492688	-1.43006	0.1102	0.99965	Down
XLOC_034334	CSF2RB	22	36913627	36940449	1.84646	0.0466242	-5.30754	0.01245	0.48535	Down
XLOC_034346	Metazoa_SRP	22	37570245	37582616	0.93237	0.415761	-1.16515	0.55555	0.99965	Down
XLOC_034382	RP4-742C19.13	22	39120166	39152674	1.04868	0.516465	-1.02183	0.45005	0.99965	Down
XLOC_034418	CSDC2	22	41560762	41589890	0.517787	0.0966213	-2.42194	0.4572	0.99965	Down
XLOC_034424	CCDC134	22	41800678	41826299	2.08163	1.02002	-1.02911	0.2809	0.99965	Down
XLOC_034668	TUBA3FP	22	20999103	21045017	0.522042	0.151439	-1.78543	0.4336	0.99965	Down
XLOC_034777	RP5-1172A22.1	22	27221348	27224727	1.84699	0.262097	-2.817	0.10585	0.99965	Down
XLOC_034783	MN1	22	27748276	27801498	2.87574	1.01591	-1.50116	0.02245	0.705066	Down
XLOC_034816	LIF	22	30239193	30246998	77.4425	4.47505	-4.11315	5e-05	0.0106919	Down
XLOC_034841	PIK3IP1	22	31281592	31346232	8.91568	3.42975	-1.37824	0.0678	0.99965	Down
XLOC_035003	CYP2D7	22	42140202	42144577	1.10128	0.373048	-1.56175	0.1548	0.99965	Down
XLOC_035052	WNT7B	22	45920361	45977129	1.0094	0.118861	-3.08615	0.0759	0.99965	Down
XLOC_035063	CTA-29F11.1	22	46761893	46762563	0.838177	0.245354	-1.77239	0.26645	0.99965	Down
XLOC_035089	RP3-402G11.27	22	50200978	50217616	1.0831	0.390484	-1.47183	0.6329	0.99965	Down
XLOC_035122	LRRN1	3	3700813	4467281	0.6701	0.27633	-1.27798	0.6239	0.99965	Down
XLOC_035127	BHLHE40	3	4896808	4985323	25.9986	10.5819	-1.29684	0.00975	0.419123	Down
XLOC_035169	FANCD2	3	10026413	10108231	0.979318	0.364625	-1.42537	0.25765	0.99965	Down
XLOC_035265	RARB	3	24687918	25664939	9.12957	0.779964	-3.54907	0.05795	0.99965	Down
XLOC_035487	RP13-131K19.6	3	49024324	49029706	0.563372	0.177812	-1.66374	0.5393	0.99965	Down
XLOC_035636	KBTBD8	3	66998306	67011210	0.815788	0.381069	-1.09814	0.24845	0.99965	Down
XLOC_035648	CTD-2013N24.2	3	68975213	69080408	0.558301	0.217928	-1.35719	0.26525	0.99965	Down
XLOC_035651	MITF	3	69739434	69968337	1.00424	0.415603	-1.27282	0.0931	0.99965	Down
XLOC_035679	CTD-2006M22.2,PDZRN3-AS1	3	73382432	73627626	0.530859	0.248241	-1.09659	0.60375	0.99965	Down
XLOC_035735	HTR1F	3	87990695	87993835	2.27294	0.11317	-4.32799	0.0194	0.649989	Down
XLOC_035736	RP11-159G9.5	3	88051943	88168729	8.33252	2.94501	-1.50048	0.45695	0.99965	Down
XLOC_035786	ST3GAL6	3	98714329	98901689	0.742685	0.196008	-1.92184	0.1459	0.99965	Down
XLOC_035867	PHLDB2,PLCXD2	3	111674675	111976517	30.0296	10.6041	-1.50176	0.0033	0.215181	Down
XLOC_035871	C3orf52	3	112086334	112133305	2.63141	0.900424	-1.54716	0.07755	0.99965	Down
XLOC_035874	CD200	3	112302477	112362812	4.23083	0.64175	-2.72086	0.0007	0.072705	Down
XLOC_035904	GAP43	3	115623323	115721490	0.720285	0.109908	-2.71227	0.07995	0.99965	Down
XLOC_035968	RP11-9N20.3	3	123585541	123884331	0.661831	0.106804	-2.6315	0.44385	0.99965	Down
XLOC_036022	GATA2-AS1	3	128479426	128502348	0.504532	0.197532	-1.35286	0.5582	0.99965	Down
XLOC_036068	ACKR4	3	132558137	132874223	1.01511	0.0719914	-3.81767	0.4104	0.99965	Down
XLOC_036089	EPHB1	3	134597800	135260467	0.731	0.282731	-1.37044	0.0956	0.99965	Down
XLOC_036123	CLSTN2	3	139935184	140577397	0.606201	0.0582936	-3.37839	0.0187	0.635319	Down
XLOC_036129	PXYLP1	3	141228725	141449792	7.92407	2.86218	-1.46913	0.24525	0.99965	Down
XLOC_036163	RP11-274H2.2	3	146064041	146163653	0.908678	0.14496	-2.64811	0.42945	0.99965	Down
XLOC_036243	KCNAB1	3	156037700	156539138	1.83482	0.349838	-2.39088	0.0015	0.132191	Down
XLOC_036244	TIPARP	3	156671861	156706770	44.0568	18.9071	-1.22044	0.0196	0.650693	Down
XLOC_036260	MFSD1	3	158696891	158829719	67.9165	30.4435	-1.15763	0.02465	0.7483	Down
XLOC_036333	CLDN11	3	170418864	170860380	40.6669	13.8282	-1.55624	0.00585	0.312738	Down
XLOC_036370	RP11-255C15.3	3	179340321	179341887	0.482827	0.239272	-1.01285	0.42185	0.99965	Down
XLOC_036562	RP11-496H1.2	3	197645668	197646017	0.922087	0.431871	-1.0943	0.52575	0.99965	Down
XLOC_036598	AC018816.3	3	4493347	4887293	0.706446	0.178563	-1.98415	0.2348	0.99965	Down
XLOC_036756	NEK10	3	27110084	27369460	1.42632	0.510438	-1.48249	0.09825	0.99965	Down
XLOC_036760	SLC4A7	3	27372720	27484420	15.0005	7.08868	-1.08142	0.07715	0.99965	Down
XLOC_036769	RBMS3-AS3	3	29264193	30010391	0.945044	0.459639	-1.03988	0.7009	0.99965	Down
XLOC_036803	RP11-10C24.1	3	33797148	33797681	0.460406	0.222604	-1.04843	0.52595	0.99965	Down
XLOC_036835	RPL18AP7	3	38496126	38542161	0.707999	0.114005	-2.63465	0.5209	0.99965	Down
XLOC_036841	CSRNP1	3	39141854	39154562	7.80644	3.41429	-1.19308	0.0389	0.925769	Down
XLOC_036898	CDCP1	3	45082277	45146422	47.5274	0.649699	-6.19285	5e-05	0.0106919	Down
XLOC_036900	TMEM158	3	45224465	45226278	101.989	9.52113	-3.42114	5e-05	0.0106919	Down
XLOC_036913	LTF	3	46435644	46485234	3.16862	0.608528	-2.38046	0.0087	0.395136	Down
XLOC_036914	LRRC2	3	46515422	46626543	5.20546	1.17874	-2.14278	0.0147	0.53842	Down
XLOC_036916	ALS2CL	3	46668996	46693704	3.93414	1.05191	-1.90304	0.0114	0.457921	Down
XLOC_036960	RP13-131K19.1	3	48917787	49023495	0.651557	0.315627	-1.04567	0.66455	0.99965	Down
XLOC_037071	IL17RD	3	57089981	57170306	0.775872	0.105386	-2.88013	0.00955	0.418273	Down
XLOC_037073	ASB14	3	57227736	57292682	0.506015	0.125788	-2.00819	0.21285	0.99965	Down
XLOC_037081	FLNB-AS1	3	58008399	58172251	0.958707	0.318511	-1.58975	0.4262	0.99965	Down
XLOC_037125	LRIG1	3	66133609	66501263	7.68656	3.36632	-1.19116	0.0604	0.99965	Down
XLOC_037136	FRMD4B	3	69169989	69542583	5.50168	1.98367	-1.4717	0.03635	0.891341	Down
XLOC_037166	PDZRN3	3	73382432	73627626	7.19877	3.16586	-1.18515	0.0312	0.84327	Down
XLOC_037249	RP11-389G6.4	3	97822039	97972457	0.528077	0.0858196	-2.62137	0.4728	0.99965	Down
XLOC_037257	DCBLD2	3	98714329	98901689	134.901	25.4524	-2.40603	0.00015	0.0253622	Down
XLOC_037265	FILIP1L	3	99817833	100178603	7.6664	2.42934	-1.65799	0.04335	0.984926	Down
XLOC_037274	RP11-234A1.1	3	101574094	101594437	1.15367	0.553016	-1.06083	0.669	0.99965	Down
XLOC_037289	LINC00882	3	106836810	107240641	3.01531	1.39405	-1.11303	0.18915	0.99965	Down
XLOC_037333	BTLA	3	112463967	112499561	0.442736	0.186444	-1.24771	0.5245	0.99965	Down
XLOC_037620	PCOLCE2	3	142815921	142889203	29.9042	11.0835	-1.43194	0.021	0.674203	Down
XLOC_037632	RP11-274H2.5	3	146059584	146061679	1.5112	0.522242	-1.5329	0.1345	0.99965	Down
XLOC_037633	RP11-274H2.3	3	146064041	146163653	1.71173	0.456298	-1.9074	0.47745	0.99965	Down
XLOC_037634	PLOD2	3	146064041	146163653	414.303	161.332	-1.36066	0.07485	0.99965	Down
XLOC_037661	TM4SF1	3	149369021	149386583	226.308	64.8492	-1.80313	0.0007	0.072705	Down
XLOC_037695	RP11-362A9.3	3	152243827	152496813	0.685735	0.131786	-2.37946	0.46535	0.99965	Down
XLOC_037729	RP11-305K5.1	3	156037700	156539138	3.33488	1.07234	-1.63687	0.4374	0.99965	Down
XLOC_037731	TIPARP-AS1	3	156671861	156706770	0.460793	0.146907	-1.64922	0.55445	0.99965	Down
XLOC_037741	VEPH1	3	157175222	157533619	10.0826	4.06163	-1.31174	0.22045	0.99965	Down
XLOC_037746	SHOX2	3	158095953	158571066	2.19512	0.993694	-1.14343	0.45095	0.99965	Down
XLOC_037752	LXN	3	158644277	158692575	14.3663	4.05889	-1.82353	0.19375	0.99965	Down
XLOC_037753	RP11-379F4.7	3	158693119	158693768	0.524769	0.25575	-1.03695	0.50165	0.99965	Down
XLOC_037754	RARRES1	3	158696891	158829719	2.70834	1.04522	-1.37359	0.3971	0.99965	Down
XLOC_037817	SLC7A14	3	170418864	170860380	2.97192	0.428878	-2.79276	0.02965	0.819659	Down
XLOC_037841	NCEH1	3	172630248	172711218	12.7107	4.90964	-1.37235	0.01055	0.437059	Down
XLOC_037936	CAMK2N2	3	184134018	184684758	1.51893	0.734164	-1.04888	0.6624	0.99965	Down
XLOC_037966	MASP1	3	187217284	187292022	1.3689	0.404146	-1.76007	0.02545	0.755127	Down
XLOC_038063	MFI2	3	196988620	197029816	15.3114	3.66018	-2.06462	0.00855	0.392194	Down
XLOC_038180	AC097381.1	4	7754089	7940296	2.69362	0.665967	-2.01602	0.30705	0.99965	Down
XLOC_038267	BST1,FAM200B	4	15604538	15738313	78.7977	28.2088	-1.48201	0.093	0.99965	Down
XLOC_038283	SLIT2	4	20253259	20620561	11.3413	3.59584	-1.65718	0.0009	0.0878315	Down
XLOC_038374	RP11-360F5.3	4	39133912	39135608	0.584629	0.280175	-1.06119	0.52595	0.99965	Down
XLOC_038561	EPHA5-AS1	4	65319562	65698029	10.5815	1.10997	-3.25296	0.3571	0.99965	Down
XLOC_038562	RP11-807H7.2	4	65702201	65705553	2.31358	0.912077	-1.3429	0.341	0.99965	Down
XLOC_038626	SLC4A4	4	71187285	71572087	11.3634	3.0177	-1.91287	0.00035	0.0454406	Down
XLOC_038647	EPGN	4	74308472	74315307	13.9148	5.55555	-1.32462	0.07225	0.99965	Down
XLOC_038649	EREG	4	74365142	74388751	0.474426	0.104072	-2.18861	0.05955	0.99965	Down
XLOC_038670	SHROOM3	4	76435099	76801964	3.02807	1.43752	-1.07482	0.0373	0.906989	Down
XLOC_038686	ANXA3	4	78551518	78610451	1.39586	0.486252	-1.52138	0.10535	0.99965	Down
XLOC_038689	BMP2K	4	78776341	78939438	5.29515	2.49502	-1.08562	0.4837	0.99965	Down
XLOC_038700	PRDM8	4	80183279	80204329	2.44054	1.20681	-1.016	0.1678	0.99965	Down
XLOC_038701	C4orf22,FGF5	4	80266598	80963756	19.171	6.13843	-1.64299	0.00545	0.299534	Down
XLOC_038709	RP11-127B20.3	4	82352497	82384027	0.473627	0.184276	-1.36189	0.59325	0.99965	Down
XLOC_038722	AGPAT9	4	83535913	83605875	1.34681	0.208836	-2.68911	0.01125	0.455672	Down
XLOC_038726	WDFY3-AS1	4	84669609	85011277	1.93772	0.870957	-1.15369	0.6948	0.99965	Down
XLOC_038745	IBSP	4	87799580	87812435	5.96973	2.45742	-1.28052	0.10225	0.99965	Down
XLOC_038748	SPP1	4	87975649	87983426	10.4182	2.35509	-2.14526	0.0083	0.384232	Down
XLOC_038760	FAM13A-AS1,FAM13A-AS1_1,FAM13A-AS1_2	4	88709788	89111398	0.525326	0.170074	-1.62705	0.4892	0.99965	Down
XLOC_038848	AIMP1	4	106041598	106349226	46.8941	22.3371	-1.06996	0.19425	0.99965	Down
XLOC_038873	EGF	4	109912883	110012266	1.09738	0.130109	-3.07627	0.0407	0.94691	Down
XLOC_038936	USP53	4	119192772	119295517	30.3953	12.5492	-1.27625	0.01355	0.510442	Down
XLOC_038959	FGF2	4	122826707	122922968	47.9111	19.9922	-1.26092	0.0383	0.922933	Down
XLOC_038977	HSPA4L	4	127781820	127844040	6.48889	2.61916	-1.30887	0.05505	0.99965	Down
XLOC_038978	PLK4	4	127880860	127899195	0.486507	0.148646	-1.71058	0.119	0.99965	Down
XLOC_038983	RP11-420A23.1	4	128292750	128519394	0.680873	0.250065	-1.44508	0.2022	0.99965	Down
XLOC_039067	HHIP	4	144642921	144745271	19.7915	2.02224	-3.29086	0.00065	0.0700122	Down
XLOC_039179	GRIA2	4	157204181	157366075	0.429443	0.015974	-4.74867	0.00165	0.141133	Down
XLOC_039240	ANXA10	4	167946673	168187690	3.5002	0.230402	-3.92521	0.01955	0.650518	Down
XLOC_039326	ANKRD37	4	185396020	185425985	5.38149	1.35491	-1.9898	0.25195	0.99965	Down
XLOC_039446	AC226119.4,AC226119.5,FAM86EP	4	3915182	3955419	2.76544	1.29951	-1.08954	0.30775	0.99965	Down
XLOC_039481	AFAP1	4	7754089	7940296	45.171	19.265	-1.22941	0.0235	0.723969	Down
XLOC_039547	RP11-115L11.1	4	15604538	15738313	1.18283	0.329712	-1.84297	0.524	0.99965	Down
XLOC_039554	LDB2	4	16400429	16898809	20.6634	9.40755	-1.13518	0.0769	0.99965	Down
XLOC_039596	CCKAR	4	26481399	26490462	3.04486	0.107875	-4.81894	0.06525	0.99965	Down
XLOC_039641	TMEM156	4	38966743	39032922	0.510175	0.165998	-1.61982	0.2193	0.99965	Down
XLOC_039663	RP11-227F19.5	4	41359606	41700044	0.6281	0.300149	-1.06531	0.64365	0.99965	Down
XLOC_039705	TEC	4	48135782	48269864	1.07635	0.396748	-1.43986	0.1933	0.99965	Down
XLOC_039771	RP11-738E22.3	4	56960926	56961373	0.450948	0.143905	-1.64785	0.44455	0.99965	Down
XLOC_039802	EPHA5	4	65319562	65698029	14.5095	2.17782	-2.73604	5e-05	0.0106919	Down
XLOC_039863	ADAMTS3	4	72280968	72568799	0.463122	0.174898	-1.40488	0.1505	0.99965	Down
XLOC_040035	RP11-571L19.8	4	99067255	99068125	0.540071	0.176876	-1.61041	0.28105	0.99965	Down
XLOC_040098	DKK2	4	106921801	107301870	6.21473	1.42438	-2.12536	0.0427	0.977757	Down
XLOC_040110	COL25A1	4	108810720	109302657	2.36127	0.194314	-3.6031	0.0029	0.195226	Down
XLOC_040166	PRSS12	4	118280037	118353003	22.0993	8.04504	-1.45783	0.00585	0.312738	Down
XLOC_040178	PDE5A	4	119454790	119628991	14.3809	4.60029	-1.64436	0.00335	0.217466	Down
XLOC_040187	TNIP3	4	121131407	121227466	0.787287	0.357395	-1.13937	0.23985	0.99965	Down
XLOC_040205	NUDT6	4	122826707	122922968	38.2765	15.69	-1.28661	0.56755	0.99965	Down
XLOC_040295	SCOC-AS1	4	140257285	140385726	0.55785	0.164301	-1.76354	0.4834	0.99965	Down
XLOC_040298	CLGN	4	140388454	140427968	1.6929	0.475081	-1.83325	0.04055	0.946097	Down
XLOC_040323	HHIP-AS1	4	144642921	144745271	9.86085	2.51539	-1.97093	0.16805	0.99965	Down
XLOC_040324	uc_338	4	144642921	144745271	2.97972	1.22336	-1.28433	0.59165	0.99965	Down
XLOC_040481	DDX60	4	168216292	168318807	1.75847	0.835764	-1.07316	0.18965	0.99965	Down
XLOC_040508	RP11-798M19.3	4	173131927	173329694	4.04571	1.83897	-1.13749	0.3405	0.99965	Down
XLOC_040541	VEGFC	4	176669620	176792727	64.9623	28.7934	-1.17386	0.01915	0.643095	Down
XLOC_040604	CCDC110	4	185426248	185472263	1.00793	0.157615	-2.67692	0.0542	0.99965	Down
XLOC_040605	PDLIM3	4	185500659	185535612	10.2638	4.96138	-1.04875	0.0831	0.99965	Down
XLOC_040694	LINC01018	5	6582135	6588499	0.780853	0.143055	-2.44848	0.08185	0.99965	Down
XLOC_040843	CDH6	5	31093976	31329146	7.35602	1.74388	-2.07663	0.00365	0.22976	Down
XLOC_040884	IL7R	5	35852694	35879603	1.53994	0.392657	-1.97153	0.01515	0.55074	Down
XLOC_040915	CTD-2078B5.2	5	39520430	39524708	2.16538	0.106519	-4.34544	0.1573	0.99965	Down
XLOC_040973	ITGA2	5	52675192	53094779	27.4123	1.29777	-4.40071	0.02475	0.749723	Down
XLOC_040977	FST	5	53480408	53487134	85.9847	33.6893	-1.35179	0.01685	0.5904	Down
XLOC_041133	FOXD1-AS1	5	73444826	73448362	95.7671	40.9073	-1.22717	0.1318	0.99965	Down
XLOC_041154	CTC-366B18.4	5	75608816	75609983	0.548657	0.208413	-1.39646	0.3325	0.99965	Down
XLOC_041176	PDE8B	5	77210448	77620611	0.518084	0.205567	-1.33358	0.36225	0.99965	Down
XLOC_041249	RASA1	5	87267887	87413019	25.5843	9.49352	-1.43024	0.0207	0.668886	Down
XLOC_041297	CTD-2337A12.1	5	95885097	96808100	2.84288	1.14993	-1.30581	0.60765	0.99965	Down
XLOC_041321	RGMB	5	98768649	98798643	28.4979	9.06184	-1.65298	0.15065	0.99965	Down
XLOC_041350	C5orf30	5	103258701	103278660	60.4463	17.7797	-1.76543	0.0013	0.118889	Down
XLOC_041373	TSLP	5	111070061	111130502	1.35496	0.336866	-2.008	0.40325	0.99965	Down
XLOC_041543	TCF7	5	134114710	134371047	5.42455	2.67248	-1.02132	0.4854	0.99965	Down
XLOC_041563	C5orf66	5	135027734	135401296	0.476779	0.143677	-1.73049	0.4021	0.99965	Down
XLOC_041622	IGIP	5	140125934	140129392	4.64578	2.27573	-1.02959	0.0996	0.99965	Down
XLOC_041644	PCDHB2	5	141046259	141098703	1.50748	0.469943	-1.68158	0.08915	0.99965	Down
XLOC_041675	AC005592.2	5	142310426	142698070	0.530778	0.219143	-1.27624	0.38955	0.99965	Down
XLOC_041695	SH3RF2	5	145936578	146081791	3.86088	0.864892	-2.15834	0.0271	0.777044	Down
XLOC_041748	IRGM	5	150846522	150904983	0.499284	0.120865	-2.04647	0.50485	0.99965	Down
XLOC_041750	GPX3	5	151020437	151028993	5.23292	2.36503	-1.14576	0.10355	0.99965	Down
XLOC_041784	SGCD	5	155870343	156767788	6.18026	2.81532	-1.13437	0.1219	0.99965	Down
XLOC_041790	CYFIP2	5	157260121	157575775	1.48866	0.642867	-1.21142	0.18785	0.99965	Down
XLOC_041840	CTC-340A15.2	5	164296695	165171643	2.89568	1.29265	-1.16357	0.16905	0.99965	Down
XLOC_041848	WWC1	5	168291650	168472303	4.39678	2.10184	-1.06479	0.1708	0.99965	Down
XLOC_041858	SPDL1	5	169583633	169604778	9.13882	4.03437	-1.17967	0.031	0.842563	Down
XLOC_041859	DOCK2	5	169637246	170083382	1.22053	0.599605	-1.02543	0.3422	0.99965	Down
XLOC_042048	SLC9A3	5	473235	524332	1.5254	0.67451	-1.17728	0.72045	0.99965	Down
XLOC_042187	MYO10	5	16661913	16936276	20.4605	9.44362	-1.11543	0.0283	0.795958	Down
XLOC_042296	ADAMTS12	5	33523534	33892192	27.3618	10.1989	-1.42374	0.0081	0.377507	Down
XLOC_042333	GDNF	5	37812676	37839686	25.2749	9.91763	-1.34964	0.0075	0.357566	Down
XLOC_042400	EMB	5	50396191	50443248	5.71138	1.54982	-1.88174	0.0055	0.299534	Down
XLOC_042429	ESM1	5	54977863	55042844	52.2034	0.414637	-6.97615	5e-05	0.0106919	Down
XLOC_042471	PLK2	5	58453981	58460260	62.3328	18.1093	-1.78326	0.00085	0.0846565	Down
XLOC_042506	ADAMTS6	5	65148735	65481920	11.9346	3.44535	-1.79243	0.00435	0.25403	Down
XLOC_042582	FOXD1	5	73444826	73448362	16.9812	7.81725	-1.1192	0.07435	0.99965	Down
XLOC_042593	ENC1	5	74627405	74867854	60.958	30.4322	-1.00222	0.26265	0.99965	Down
XLOC_042652	CTC-512J14.5	5	80351020	80351956	0.493783	0.0539863	-3.19321	0.26155	0.99965	Down
XLOC_042688	HAPLN1	5	83637804	83721613	273.415	76.0796	-1.84551	0.0214	0.679427	Down
XLOC_042710	CTC-428H11.2	5	87267887	87413019	2.61601	0.985606	-1.40829	0.67465	0.99965	Down
XLOC_042720	MEF2C	5	88507545	89466398	4.46385	2.18421	-1.03117	0.09525	0.99965	Down
XLOC_042747	NPM1P27	5	93618068	94111699	0.699852	0.187333	-1.90145	0.56745	0.99965	Down
XLOC_042788	RGMB-AS1	5	98768649	98798643	3.54416	1.73616	-1.02955	0.53145	0.99965	Down
XLOC_042789	DKFZp434P228	5	98768649	98798643	48.8496	18.6317	-1.39059	0.0325	0.857712	Down
XLOC_043072	LRRTM2	5	138610966	138935034	0.438516	0.0234606	-4.22432	0.18105	0.99965	Down
XLOC_043090	NRG2	5	139846778	140043299	0.436151	0.0355055	-3.61871	0.00805	0.376383	Down
XLOC_043091	LINC01024	5	140072856	140125619	1.5272	0.568681	-1.42519	0.26475	0.99965	Down
XLOC_043094	HBEGF	5	140332842	140346631	5.44276	1.93026	-1.49554	0.036	0.891341	Down
XLOC_043117	AC005618.8	5	141330570	141512981	1.95971	0.843738	-1.21577	0.6436	0.99965	Down
XLOC_043124	PCDH1	5	141853110	141879246	0.674565	0.235393	-1.51888	0.13575	0.99965	Down
XLOC_043133	FGF1	5	142310426	142698070	6.73797	2.95437	-1.18946	0.1951	0.99965	Down
XLOC_043146	PRELID2	5	145471798	145835369	3.41574	1.24371	-1.45755	0.1551	0.99965	Down
XLOC_043160	DPYSL3	5	147390810	147510056	66.497	31.2046	-1.09153	0.044	0.99503	Down
XLOC_043164	C5orf46	5	147870681	147906538	16.1459	6.50285	-1.31203	0.12705	0.99965	Down
XLOC_043194	ARSI	5	150296342	150339307	2.34729	0.887211	-1.40365	0.092	0.99965	Down
XLOC_043220	CTB-113P19.5	5	151724830	151725356	0.821374	0.226786	-1.85671	0.35105	0.99965	Down
XLOC_043258	ADAM19	5	157260121	157575775	11.7534	3.95853	-1.57004	0.0028	0.191149	Down
XLOC_043334	FAM196B	5	169637246	170083382	2.57612	0.764393	-1.75281	0.08615	0.99965	Down
XLOC_043572	TMEM170B	6	11538277	11583524	0.922711	0.344845	-1.41993	0.0692	0.99965	Down
XLOC_043578	EDN1	6	12290362	12297194	6.87912	2.40513	-1.51611	0.0344	0.876025	Down
XLOC_043584	GFOD1-AS1	6	13357829	13487662	0.507781	0.236424	-1.10283	0.591	0.99965	Down
XLOC_043611	RP1-151F17.2	6	16764345	16766883	0.46309	0.212611	-1.12308	0.3012	0.99965	Down
XLOC_043615	RBM24	6	17281345	17293875	3.03008	0.267861	-3.4998	0.0006	0.0671123	Down
XLOC_043617	CAP2	6	17393215	17557792	11.1334	3.14166	-1.8253	0.00245	0.177241	Down
XLOC_043717	HMGN4	6	26538404	26546254	75.8895	30.1613	-1.3312	0.17695	0.99965	Down
XLOC_043932	HSD17B8	6	33204641	33206831	0.461426	0.216776	-1.0899	0.42455	0.99965	Down
XLOC_043954	HMGA1	6	34236872	34246231	135.99	55.2819	-1.29862	0.02225	0.700297	Down
XLOC_044088	VEGFA	6	43770183	43786487	324.538	122.121	-1.41007	0.0426	0.977045	Down
XLOC_044233	OGFRL1	6	71221456	71420769	27.1214	11.198	-1.27619	0.0218	0.687622	Down
XLOC_044237	RIMS1	6	71886702	72403143	7.22926	3.06921	-1.23598	0.06135	0.99965	Down
XLOC_044240	KCNQ5	6	72621791	73198851	2.6286	0.989298	-1.40982	0.04095	0.949687	Down
XLOC_044320	NT5E	6	85449583	85495791	151.107	52.9429	-1.51306	0.00775	0.365886	Down
XLOC_044503	WISP3	6	112054071	112087529	4.63948	2.03836	-1.18655	0.4315	0.99965	Down
XLOC_044519	RP11-544L8__B.4	6	113904137	113921642	0.485376	0.201034	-1.27166	0.2852	0.99965	Down
XLOC_044603	TMEM200A	6	130365733	130443063	74.2899	12.2489	-2.60051	5e-05	0.0106919	Down
XLOC_044612	ENPP1	6	131808015	131895155	33.3602	13.5259	-1.3024	0.02035	0.663474	Down
XLOC_044617	RP3-523C21.2	6	132085083	132099279	0.43776	0.125521	-1.80221	0.3696	0.99965	Down
XLOC_044671	TNFAIP3	6	137823672	137883312	15.5874	5.97802	-1.38264	0.00735	0.353895	Down
XLOC_044698	ADGRG6	6	142301853	142446266	0.589089	0.227933	-1.36987	0.15285	0.99965	Down
XLOC_044774	ESR1	6	151656690	152637801	0.45542	0.199583	-1.19021	0.4382	0.99965	Down
XLOC_044779	MYCT1	6	152697894	152724567	0.522217	0.146345	-1.83527	0.2198	0.99965	Down
XLOC_044816	SYNJ2	6	157981886	158099176	18.0448	6.42865	-1.489	0.0461	0.99965	Down
XLOC_044830	FNDC1-IT1	6	159165898	159272109	0.482766	0.116636	-2.0493	0.4979	0.99965	Down
XLOC_044843	SLC22A3	6	160348267	160452581	1.92521	0.740612	-1.37822	0.08275	0.99965	Down
XLOC_044999	TFAP2A	6	10393185	10419659	2.9337	0.572578	-2.35718	0.005	0.276445	Down
XLOC_045017	ADTRP	6	11712053	11807046	0.911929	0.403239	-1.17729	0.27115	0.99965	Down
XLOC_045025	RP1-223E5.4	6	13574528	13615158	0.432557	0.142161	-1.60536	0.5709	0.99965	Down
XLOC_045095	CMAHP	6	25081067	25166555	3.75098	1.77884	-1.07633	0.20235	0.99965	Down
XLOC_045172	ZSCAN31	6	28324692	28369177	3.5551	1.29986	-1.45153	0.05705	0.99965	Down
XLOC_045246	MDC1	6	30699806	30717889	10.5754	4.80292	-1.13873	0.25735	0.99965	Down
XLOC_045250	IER3	6	30742928	30744554	144.531	29.5627	-2.28953	5e-05	0.0106919	Down
XLOC_045297	HSPA1L	6	31809618	31815065	0.888311	0.388808	-1.19201	0.2713	0.99965	Down
XLOC_045333	XXbac-BPG181M17.6	6	32934628	32981505	14.4922	7.18132	-1.01295	0.68565	0.99965	Down
XLOC_045341	XXbac-BPG157A10.21	6	33246074	33246856	0.789593	0.383568	-1.04162	0.48555	0.99965	Down
XLOC_045351	XXbac-BPG294E21.9	6	33420069	33457548	1.354	0.123355	-3.45634	0.35235	0.99965	Down
XLOC_045364	RPL35P2	6	34246379	34426125	1.49985	0.403156	-1.89541	0.52715	0.99965	Down
XLOC_045390	ETV7	6	36354090	36491143	1.61645	0.693716	-1.22041	0.4182	0.99965	Down
XLOC_045407	MDGA1	6	37630678	37699306	1.87918	0.834873	-1.17048	0.1931	0.99965	Down
XLOC_045483	RP1-261G23.7	6	43770183	43786487	362.171	102.003	-1.82806	0.6223	0.99965	Down
XLOC_045844	CD24	6	106969830	106975627	31.4127	14.4249	-1.12279	0.0229	0.711515	Down
XLOC_045905	RP11-437J19.1	6	113357002	113367944	0.495504	0.119486	-2.05205	0.3784	0.99965	Down
XLOC_045994	ARHGAP18	6	129576131	129710225	9.13734	3.84909	-1.24726	0.06475	0.99965	Down
XLOC_045999	SAMD3	6	130013698	130365425	3.17367	0.229021	-3.7926	0.0002	0.0319582	Down
XLOC_046001	EPB41L2	6	130839346	131063322	26.0493	11.8545	-1.13581	0.0201	0.658275	Down
XLOC_046034	SGK1	6	134169245	134318112	28.8766	10.0876	-1.51732	0.0018	0.147044	Down
XLOC_046101	HIVEP2	6	142748442	142945201	14.2016	6.25316	-1.1834	0.07495	0.99965	Down
XLOC_046130	STXBP5-AS1	6	146841900	147390476	2.79811	0.385111	-2.86111	0.05495	0.99965	Down
XLOC_046323	FAM20C	7	182934	260745	150.172	74.4248	-1.01276	0.1691	0.99965	Down
XLOC_046330	AC147651.4	7	549196	786475	0.897245	0.219442	-2.03166	0.56195	0.99965	Down
XLOC_046335	GPR146	7	996985	1138260	0.716828	0.332969	-1.10624	0.52185	0.99965	Down
XLOC_046451	TSPAN13	7	16753534	16784536	8.11267	1.23503	-2.71563	0.00345	0.221975	Down
XLOC_046452	AC073333.1	7	16789241	16789622	1.57099	0.742474	-1.08127	0.484	0.99965	Down
XLOC_046461	HDAC9	7	18086948	19002416	5.0885	1.46297	-1.79834	0.0044	0.254902	Down
XLOC_046473	ITGB8	7	20328298	20415754	16.9847	2.2212	-2.93482	5e-05	0.0106919	Down
XLOC_046482	SP4	7	21428033	21514822	0.829428	0.407992	-1.02357	0.26485	0.99965	Down
XLOC_046487	AC002480.3	7	22419443	22665533	0.838994	0.148334	-2.49981	0.3993	0.99965	Down
XLOC_046488	AC002480.4	7	22419443	22665533	0.43215	0.104683	-2.0455	0.5283	0.99965	Down
XLOC_046489	IL6	7	22725394	22732002	88.3612	3.1542	-4.80807	5e-05	0.0106919	Down
XLOC_046505	RPS2P32	7	23490472	23491364	0.814654	0.343214	-1.24708	0.3671	0.99965	Down
XLOC_046520	NFE2L3	7	26152239	26187125	6.49233	1.17416	-2.46711	0.0065	0.327047	Down
XLOC_046532	HOTAIRM1,HOTAIRM1_1,HOTAIRM1_2	7	27092992	27100265	14.1575	4.9004	-1.53059	0.1792	0.99965	Down
XLOC_046533	HOXA-AS2	7	27106183	27157936	7.1152	2.67817	-1.40966	0.3006	0.99965	Down
XLOC_046534	HOXA-AS3	7	27106183	27157936	0.801905	0.398153	-1.01011	0.65005	0.99965	Down
XLOC_046546	CREB5	7	28299320	28825894	1.81636	0.521908	-1.79918	0.03455	0.878307	Down
XLOC_046670	AEBP1	7	44104360	44114562	74.618	34.7667	-1.10182	0.04375	0.990917	Down
XLOC_046693	IGFBP1	7	45888356	45893668	0.456789	0.0347545	-3.71626	0.1613	0.99965	Down
XLOC_046706	C7orf69	7	47695729	47979581	0.776221	0.0855955	-3.18086	0.3785	0.99965	Down
XLOC_046844	TRIM60P18	7	64207089	64470653	0.701961	0.313147	-1.16455	0.6158	0.99965	Down
XLOC_046988	AC004980.9	7	76524514	76532692	0.424195	0.199637	-1.08735	0.5499	0.99965	Down
XLOC_046999	PHTF2	7	77798791	77957503	14.4592	7.01232	-1.04403	0.03575	0.890138	Down
XLOC_047017	CD36	7	80312573	80679277	1.11088	0.138394	-3.00485	0.0017	0.141255	Down
XLOC_047042	DBF4	7	87833567	87909541	2.62438	1.29601	-1.01789	0.3649	0.99965	Down
XLOC_047065	AKAP9	7	91940866	92110673	10.3036	4.27909	-1.26778	0.0612	0.99965	Down
XLOC_047081	AC003092.1	7	94022832	94066661	2.13604	0.286634	-2.89766	0.0763	0.99965	Down
XLOC_047095	GS1-293C5.1	7	95404866	95435198	0.669789	0.20963	-1.67586	0.5488	0.99965	Down
XLOC_047162	RP11-758P17.2,RP11-758P17.3	7	100435256	100438504	0.919759	0.281952	-1.70581	0.5501	0.99965	Down
XLOC_047182	SERPINE1	7	101127088	101139266	2946.54	1268.77	-1.21559	0.47035	0.99965	Down
XLOC_047206	LRRC17	7	102813229	103074843	1.23804	0.233464	-2.40679	0.03265	0.857712	Down
XLOC_047237	RP11-22N19.2	7	106248284	106286326	0.434253	0.182757	-1.24861	0.6583	0.99965	Down
XLOC_047249	SLC26A4	7	107653967	107717809	1.13051	0.432586	-1.38592	0.30325	0.99965	Down
XLOC_047253	CTB-13F3.1	7	107890969	108003255	2.20887	0.806303	-1.45392	0.57735	0.99965	Down
XLOC_047287	MET	7	116672389	116798386	42.4279	21.0503	-1.01117	0.04645	0.99965	Down
XLOC_047304	CPED1	7	120988676	121297444	13.4835	3.48315	-1.95273	0.0028	0.191149	Down
XLOC_047396	CPA4	7	130293133	130324180	83.2979	11.4002	-2.86923	5e-05	0.0106919	Down
XLOC_047399	MEST	7	130486041	130687432	34.9151	9.03387	-1.95044	0.0172	0.598338	Down
XLOC_047427	AKR1B10	7	134527591	134541408	4.25527	1.30141	-1.70918	0.0771	0.99965	Down
XLOC_047428	AKR1B15	7	134549135	134579875	0.65546	0.296281	-1.14554	0.38575	0.99965	Down
XLOC_047452	CHRM2	7	136685558	137182107	1.49749	0.553963	-1.43469	0.09245	0.99965	Down
XLOC_047631	CNTNAP2	7	146116001	148420998	0.468677	0.0944005	-2.31173	0.10155	0.99965	Down
XLOC_047664	RP4-751H13.5	7	149838366	149867479	0.585357	0.284451	-1.04114	0.6746	0.99965	Down
XLOC_047767	AC093627.12	7	182934	260745	0.517684	0.100505	-2.3648	0.48345	0.99965	Down
XLOC_047877	ETV1	7	13891227	13991425	8.74064	2.51757	-1.79571	0.0101	0.426931	Down
XLOC_047937	IGF2BP3	7	23298738	23470467	1.88616	0.811771	-1.21631	0.1696	0.99965	Down
XLOC_047954	OSBPL3	7	24796538	24981634	10.6207	5.21889	-1.02506	0.05795	0.99965	Down
XLOC_048101	INHBA	7	41667167	41779388	154.119	51.7068	-1.57561	0.0226	0.706724	Down
XLOC_048146	IGFBP3	7	45912244	45921874	1281.4	591.022	-1.11644	0.27115	0.99965	Down
XLOC_048362	STAG3L3	7	72969695	73029766	2.17797	1.0107	-1.10764	0.31645	0.99965	Down
XLOC_048410	CCL26	7	75769532	75789896	3.75485	1.7009	-1.14246	0.29545	0.99965	Down
XLOC_048425	AC004980.10	7	76650400	76650897	1.78665	0.245927	-2.86095	0.18845	0.99965	Down
XLOC_048435	FGL2	7	76978616	77416400	1.51661	0.154284	-3.29719	0.18285	0.99965	Down
XLOC_048460	CACNA2D1	7	81946443	82443798	8.80379	4.35617	-1.01506	0.0359	0.891341	Down
XLOC_048465	SEMA3A	7	83955776	84492724	5.97522	1.11064	-2.42761	0.0349	0.882036	Down
XLOC_048477	AC005076.5	7	87151422	87220587	1.47086	0.205931	-2.83643	0.41575	0.99965	Down
XLOC_048514	SAMD9	7	93099512	93118023	1.33365	0.630717	-1.08031	0.13375	0.99965	Down
XLOC_048522	TFPI2	7	93591572	93911265	61.4138	9.90362	-2.63254	0.0001	0.0191329	Down
XLOC_048676	CTA-363E19.2	7	107168960	107578464	0.806757	0.143576	-2.49032	0.4559	0.99965	Down
XLOC_048800	AC000123.3	7	127346789	127431924	1.00231	0.27471	-1.86735	0.57215	0.99965	Down
XLOC_048849	AC058791.1,MIR29A,MIR29B1	7	130853719	130928649	2.68051	0.863525	-1.6342	0.29255	0.99965	Down
XLOC_048855	PODXL	7	131500261	131558217	3.65578	0.506889	-2.85044	0.0028	0.191149	Down
XLOC_048870	RP11-38M8.1	7	134416289	134432453	1.06051	0.495987	-1.09639	0.3793	0.99965	Down
XLOC_048879	SLC13A4	7	135662495	135748846	0.787297	0.19612	-2.00517	0.23395	0.99965	Down
XLOC_048880	FAM180A	7	135662495	135748846	24.3235	10.2644	-1.24471	0.0589	0.99965	Down
XLOC_048887	PTN	7	137227340	137343865	6.47715	1.9959	-1.69832	0.03685	0.897547	Down
XLOC_048889	DGKI	7	137381036	137847092	3.82274	1.74382	-1.13235	0.1831	0.99965	Down
XLOC_048930	KIAA1147	7	141529202	141702153	4.44461	2.06546	-1.1056	0.1992	0.99965	Down
XLOC_048931	RP5-894A10.6	7	141529202	141702153	1.94814	0.657085	-1.56795	0.5944	0.99965	Down
XLOC_049168	RP11-10A14.3	8	9136254	9151574	0.871008	0.254722	-1.77376	0.5264	0.99965	Down
XLOC_049323	RP11-177H13.2	8	23297188	23457695	10.4396	3.73974	-1.48106	0.58815	0.99965	Down
XLOC_049331	NEFM	8	24912164	24919098	1.94159	0.0178592	-6.76443	0.0632	0.99965	Down
XLOC_049336	CDCA2	8	25458996	25507920	2.56154	0.786371	-1.70373	0.0457	0.99965	Down
XLOC_049409	NRG1	8	31639385	32767959	25.3191	2.9073	-3.12248	5e-05	0.0106919	Down
XLOC_049464	LETM2	8	38386206	38409527	4.71962	2.10384	-1.16564	0.21705	0.99965	Down
XLOC_049689	SULF1	8	69466623	69660915	463.803	211.958	-1.12973	0.19785	0.99965	Down
XLOC_049700	LACTB2-AS1	8	70608576	70669174	0.638966	0.0788048	-3.01938	0.27255	0.99965	Down
XLOC_049717	RDH10	8	73290266	73356461	23.7459	3.44089	-2.78683	0.21715	0.99965	Down
XLOC_049726	LY96	8	73991351	74029087	18.6414	8.75014	-1.09114	0.1412	0.99965	Down
XLOC_049747	PKIA	8	78426102	78605267	7.80838	3.40868	-1.19581	0.12985	0.99965	Down
XLOC_049796	CA2	8	85327607	85481493	1.79937	0.321607	-2.48412	0.0557	0.99965	Down
XLOC_049883	MATN2	8	97868839	98046469	6.63648	1.57506	-2.07502	0.0763	0.99965	Down
XLOC_049947	BAALC	8	103121031	103332866	18.9695	9.39147	-1.01426	0.42685	0.99965	Down
XLOC_049958	ZFPM2	8	104590732	106060524	1.41289	0.661478	-1.09489	0.18335	0.99965	Down
XLOC_050022	HAS2-AS1	8	121612115	121644693	20.8499	5.68871	-1.87386	0.5995	0.99965	Down
XLOC_050087	MIR1204,PVT1,PVT1_1,PVT1_3	8	127794532	128101253	217.036	53.7227	-2.01433	0.3425	0.99965	Down
XLOC_050273	CTD-2541M15.1	8	6403550	6708209	0.653598	0.139303	-2.23018	0.2922	0.99965	Down
XLOC_050413	DLC1	8	13083360	13515658	56.2965	25.4021	-1.1481	0.0387	0.925554	Down
XLOC_050444	PSD3	8	18527300	19084730	12.6559	4.43406	-1.51311	0.0126	0.489884	Down
XLOC_050481	TNFRSF10D	8	23135587	23164030	64.0241	29.1723	-1.13402	0.0339	0.867852	Down
XLOC_050484	ENTPD4,LOXL2	8	23297188	23457695	559.256	191.708	-1.5446	0.04375	0.990917	Down
XLOC_050510	SDAD1P1	8	26379258	26514092	0.515503	0.223793	-1.20382	0.57035	0.99965	Down
XLOC_050521	CLU	8	27596916	27615031	343.922	145.873	-1.23737	0.07885	0.99965	Down
XLOC_050552	RP11-51J9.5	8	30095397	30183640	0.534737	0.169336	-1.65894	0.55455	0.99965	Down
XLOC_050598	RP11-527N22.2	8	37405438	37406724	2.46076	0.597034	-2.04322	0.15875	0.99965	Down
XLOC_050599	RP11-150O12.1	8	37421340	37554183	7.52112	3.64689	-1.04428	0.21205	0.99965	Down
XLOC_050600	RP11-150O12.6	8	37421340	37554183	0.736778	0.118482	-2.63656	0.52375	0.99965	Down
XLOC_050618	RP11-350N15.6	8	38386206	38409527	2.47557	0.390052	-2.66602	0.3712	0.99965	Down
XLOC_050660	PLAT	8	42175232	42207724	432.532	27.3781	-3.98171	5e-05	0.0106919	Down
XLOC_050756	RP11-446E9.1	8	56050037	56051207	0.462861	0.0415596	-3.47732	0.2555	0.99965	Down
XLOC_050833	MYBL1	8	66562174	66614247	6.45005	2.19557	-1.55471	0.0072	0.348984	Down
XLOC_050850	LINC01592	8	68911802	69104190	0.561253	0.074436	-2.91458	0.14535	0.99965	Down
XLOC_050930	RP11-48B3.5	8	80484560	80526265	0.473083	0.186615	-1.34203	0.64345	0.99965	Down
XLOC_051003	MMP16	8	88032008	88737134	1.42009	0.216277	-2.71503	0.0109	0.443969	Down
XLOC_051124	KB-1460A1.5	8	101166804	101169629	0.444885	0.173956	-1.35471	0.21425	0.99965	Down
XLOC_051153	RP11-318M2.3	8	103121031	103332866	6.58465	3.04877	-1.11088	0.71705	0.99965	Down
XLOC_051154	RP11-1C8.6	8	103383077	103383854	0.622267	0.203254	-1.61425	0.28105	0.99965	Down
XLOC_051174	ZFPM2-AS1	8	104590732	106060524	1.13129	0.389715	-1.53747	0.32685	0.99965	Down
XLOC_051219	SAMD12	8	118189454	118858218	1.08405	0.111513	-3.28114	0.01135	0.457921	Down
XLOC_051242	HAS2	8	121612115	121644693	125.78	31.7031	-1.9882	0.0013	0.118889	Down
XLOC_051245	RP11-94A24.1	8	122414331	122428551	34.9293	7.18972	-2.28043	0.00595	0.316919	Down
XLOC_051327	NDRG1	8	133237170	133302022	86.3026	42.2101	-1.03182	0.0656	0.99965	Down
XLOC_051416	CTD-3065J16.9	8	144078001	144080647	0.577146	0.228254	-1.3383	0.4832	0.99965	Down
XLOC_051490	CD274	9	5450502	5470566	6.36999	0.871474	-2.86976	0.00045	0.0545288	Down
XLOC_051491	PDCD1LG2	9	5510569	5571254	26.8397	6.24685	-2.10317	0.00045	0.0545288	Down
XLOC_051500	RP11-307L3.2	9	6278666	6279153	2.63185	0.633249	-2.05523	0.16305	0.99965	Down
XLOC_051555	ADAMTSL1	9	18473893	18910950	41.0367	7.05451	-2.5403	5e-05	0.0106919	Down
XLOC_051634	ASS1P12	9	32945995	32947222	0.597268	0.157412	-1.92383	0.2113	0.99965	Down
XLOC_051707	RECK	9	36036432	36124451	53.4781	22.0713	-1.27677	0.0291	0.807525	Down
XLOC_051710	CCIN	9	36169393	36171334	0.47603	0.236347	-1.01015	0.37715	0.99965	Down
XLOC_051834	RP11-262H14.4	9	62856998	62900104	1.81154	0.169868	-3.41474	0.1186	0.99965	Down
XLOC_051986	RP11-575L7.8	9	83968082	83980616	8.2949	2.50007	-1.73026	0.5238	0.99965	Down
XLOC_052029	C9orf47,S1PR3	9	88990862	89005010	6.14572	2.63665	-1.22088	0.03345	0.862405	Down
XLOC_052059	FKSG56	9	92210206	92293756	2.42417	0.953585	-1.34606	0.60985	0.99965	Down
XLOC_052083	ZNF169	9	94259310	94301454	0.817907	0.313263	-1.38456	0.2802	0.99965	Down
XLOC_052130	FOXE1	9	97853253	97856715	0.897265	0.0383086	-4.54979	0.10505	0.99965	Down
XLOC_052150	NR4A3	9	99821854	99866891	0.551626	0.183745	-1.58599	0.08345	0.99965	Down
XLOC_052153	RN7SL75P	9	100099255	100301000	0.72608	0.32989	-1.13815	0.59335	0.99965	Down
XLOC_052157	MURC	9	100578078	100587906	0.983316	0.240287	-2.0329	0.06025	0.99965	Down
XLOC_052226	UGCG	9	111896765	111935369	54.674	21.4023	-1.35309	0.0095	0.41734	Down
XLOC_052241	C9orf43	9	113407234	113429684	0.44903	0.222881	-1.01054	0.6691	0.99965	Down
XLOC_052385	PKN3	9	128702522	128724127	2.3746	0.93504	-1.34459	0.25805	0.99965	Down
XLOC_052481	OLFM1	9	135075242	135121179	0.827514	0.260156	-1.66941	0.17535	0.99965	Down
XLOC_052567	RP11-264I13.2	9	2015218	2193624	0.997829	0.15848	-2.65449	0.4802	0.99965	Down
XLOC_052669	RP11-513M16.7	9	19230434	19373545	1.07215	0.311762	-1.78199	0.58305	0.99965	Down
XLOC_052705	MIR31HG	9	21455483	21559669	12.8412	6.07038	-1.08093	0.19485	0.99965	Down
XLOC_052706	IFNE	9	21455483	21559669	0.935958	0.287716	-1.7018	0.4451	0.99965	Down
XLOC_052712	CDKN2B	9	21802542	22121097	11.8435	3.77389	-1.64998	0.16475	0.99965	Down
XLOC_052800	CCL27,RP11-195F19.5	9	34638132	34681298	4.18806	2.06547	-1.01981	0.54195	0.99965	Down
XLOC_052834	YBX1P10	9	35971343	35972318	1.46216	0.56566	-1.3701	0.21005	0.99965	Down
XLOC_053097	GKAP1	9	83739420	83829516	0.650675	0.300072	-1.11663	0.33135	0.99965	Down
XLOC_053172	RP11-526D8.11	9	92809387	92899608	0.818135	0.363846	-1.16901	0.51385	0.99965	Down
XLOC_053210	ZNF782	9	96816471	96875623	0.510186	0.174816	-1.54518	0.13885	0.99965	Down
XLOC_053311	CTNNAL1	9	108934180	109013529	60.5076	21.3045	-1.50596	0.0055	0.299534	Down
XLOC_053533	FIBCD1	9	130902437	130945520	4.86002	1.55724	-1.64197	0.065	0.99965	Down
XLOC_053535	RP11-544A12.4	9	131125560	131234670	0.438052	0.0725195	-2.59466	0.0462	0.99965	Down
XLOC_058043	XG	X	2752049	2815927	9.24882	3.50527	-1.39974	0.06215	0.99965	Down
XLOC_058070	SHROOM2	X	9786455	9949443	4.10383	1.69094	-1.27914	0.0747	0.99965	Down
XLOC_058167	PDK3	X	24465220	24539837	2.74715	1.20945	-1.18358	0.162	0.99965	Down
XLOC_058169	GS1-358P8.4	X	24545515	24550466	1.49217	0.554798	-1.42737	0.06655	0.99965	Down
XLOC_058313	RGN	X	47078354	47093314	2.35309	1.07261	-1.13343	0.23935	0.99965	Down
XLOC_058723	DRP2	X	101219768	101264497	2.75326	0.637029	-2.11171	0.00375	0.233029	Down
XLOC_058761	TCEAL7	X	103330195	103332326	3.88472	1.67459	-1.214	0.1974	0.99965	Down
XLOC_058764	RP13-349O20.2	X	103404776	103408299	0.570817	0.217039	-1.39507	0.42215	0.99965	Down
XLOC_058789	CXorf57	X	106611929	106679442	0.855839	0.382611	-1.16146	0.21785	0.99965	Down
XLOC_058791	RNF128	X	106693793	106796993	3.09172	0.459991	-2.74873	0.0044	0.254902	Down
XLOC_059043	RAB28P5	X	136840930	136880764	0.783908	0.254722	-1.62176	0.58335	0.99965	Down
XLOC_059130	MAMLD1	X	150361421	150514178	4.48553	1.73272	-1.37224	0.0357	0.890138	Down
XLOC_059159	ZNF185	X	152914441	152973480	4.67545	1.3103	-1.8352	0.01	0.423936	Down
XLOC_059224	RP11-218L14.4	X	155466539	155669944	0.436635	0.105747	-2.04582	0.54165	0.99965	Down
XLOC_059248	MXRA5	X	3308564	3346641	2.34789	1.13516	-1.04846	0.0673	0.99965	Down
XLOC_059305	GS1-600G8.5	X	13266047	13303452	0.75085	0.12578	-2.57762	0.1151	0.99965	Down
XLOC_059427	TMEM47	X	34627063	34657288	66.5783	33.0793	-1.00912	0.0644	0.99965	Down
XLOC_059500	RP5-1158E12.3	X	45848073	45851490	0.807968	0.190639	-2.08345	0.3784	0.99965	Down
XLOC_059514	SLC9A7	X	46599251	46759172	25.5466	9.52252	-1.42371	0.01985	0.653029	Down
XLOC_059553	RP11-1148L6.9	X	48568013	48579066	0.661771	0.213602	-1.63141	0.5526	0.99965	Down
XLOC_059565	KCND1	X	48961377	48971569	0.52137	0.211482	-1.30177	0.25795	0.99965	Down
XLOC_059617	FAM156A	X	52926401	52995472	0.71003	0.341007	-1.05808	0.131	0.99965	Down
XLOC_059892	PCDH19	X	100291643	100410273	0.424741	0.151983	-1.48267	0.15125	0.99965	Down
XLOC_059987	AMMECR1	X	110194185	110456334	3.85256	1.91175	-1.01093	0.1575	0.99965	Down
XLOC_060005	AMOT	X	112774502	112840815	1.40332	0.600722	-1.22408	0.2097	0.99965	Down
XLOC_060020	RP5-878I13.2	X	115454732	115455194	0.57081	0.13691	-2.05978	0.3784	0.99965	Down

## Sheet: Neutrally_Regulated
Cuffmerge Gene ID	Gene Name	Chromosome	Gene Start (bp)	Gene End (bp)	FPKM 1	FPKM 2	log2(fold_change)	P_value	Q_value	Regulation
XLOC_000006	CICP27	1	89294	134836	0.741608	0.519658	-0.513095	0.6504	0.99965	NEUTRAL
XLOC_000015	MTND2P28	1	601435	724903	31.0351	19.972	-0.635921	0.69465	0.99965	NEUTRAL
XLOC_000016	AC114498.1	1	601435	724903	19811.9	15516.7	-0.352546	0.669	0.99965	NEUTRAL
XLOC_000017	RP5-857K21.6	1	601435	724903	14.696	15.4756	0.0745718	0.54745	0.99965	NEUTRAL
XLOC_000018	RP5-857K21.7	1	601435	724903	0.573081	0.639423	0.158033	0.92115	0.99965	NEUTRAL
XLOC_000019	MTATP6P1,MTATP8P1,RP5-857K21.11	1	601435	724903	464.019	384.599	-0.270828	0.65555	0.99965	NEUTRAL
XLOC_000023	RP11-206L10.9	1	778769	819837	1.2734	1.69881	0.415842	0.64875	0.99965	NEUTRAL
XLOC_000025	LINC01128	1	825137	859446	4.19336	4.86264	0.213633	0.77025	0.99965	NEUTRAL
XLOC_000030	KLHL17	1	960586	965715	13.0009	11.782	-0.142021	0.82935	0.99965	NEUTRAL
XLOC_000032	ISG15	1	1001137	1014541	9.84413	13.6388	0.470378	0.5106	0.99965	NEUTRAL
XLOC_000041	B3GALT6	1	1232264	1235041	6.73123	7.66529	0.187471	0.7342	0.99965	NEUTRAL
XLOC_000043	PUSL1	1	1292375	1324691	7.23018	8.69503	0.266158	0.83995	0.99965	NEUTRAL
XLOC_000044	CPTP	1	1324755	1328897	7.98577	9.8139	0.297396	0.58825	0.99965	NEUTRAL
XLOC_000047	RP4-758J18.2	1	1399521	1407313	4.32646	4.74198	0.132301	0.9047	0.99965	NEUTRAL
XLOC_000048	RP4-758J18.13	1	1409095	1410618	1.61891	1.44986	-0.159111	0.87025	0.99965	NEUTRAL
XLOC_000051	VWA1	1	1434860	1442882	3.02408	3.23362	0.0966537	0.91185	0.99965	NEUTRAL
XLOC_000052	ATAD3C	1	1449688	1470158	0.768322	0.645808	-0.250606	0.8555	0.99965	NEUTRAL
XLOC_000053	ATAD3B	1	1471768	1497848	4.3325	5.8001	0.420878	0.49895	0.99965	NEUTRAL
XLOC_000054	ATAD3A	1	1512150	1534687	11.8767	16.2602	0.453216	0.3788	0.99965	NEUTRAL
XLOC_000057	MIB2	1	1613757	1630610	9.17968	8.32131	-0.141633	0.83745	0.99965	NEUTRAL
XLOC_000060	RP11-345P4.6,RP11-345P4.7	1	1632094	1745992	1.14926	1.1057	-0.0557382	0.9733	0.99965	NEUTRAL
XLOC_000061	RP1-283E3.4	1	1632094	1745992	2.26316	2.90897	0.362169	0.8693	0.99965	NEUTRAL
XLOC_000067	SKI	1	2228694	2310119	26.1709	32.9185	0.330935	0.53635	0.99965	NEUTRAL
XLOC_000068	RER1	1	2391774	2413797	64.1027	78.1391	0.285659	0.62	0.99965	NEUTRAL
XLOC_000071	TNFRSF14	1	2549919	2565382	7.00549	7.20801	0.0411159	0.94635	0.99965	NEUTRAL
XLOC_000074	FAM213B	1	2586490	2801721	6.75306	7.81368	0.210459	0.74605	0.99965	NEUTRAL
XLOC_000077	PRDM16	1	3069167	3438621	1.84057	2.07813	0.175134	0.86935	0.99965	NEUTRAL
XLOC_000081	TPRG1L	1	3625001	3630127	30.0438	31.9403	0.0883102	0.86195	0.99965	NEUTRAL
XLOC_000087	RP1-286D6.5	1	3778557	3796504	1.73598	0.895132	-0.955579	0.73285	0.99965	NEUTRAL
XLOC_000088	DFFB	1	3857266	3885429	2.37826	1.52092	-0.644967	0.45005	0.99965	NEUTRAL
XLOC_000096	KCNAB2	1	5862810	6101193	2.04892	1.37528	-0.57514	0.47905	0.99965	NEUTRAL
XLOC_000097	RNF207	1	6181268	6235972	2.00609	1.18485	-0.759687	0.46985	0.99965	NEUTRAL
XLOC_000101	ESPN	1	6424787	6520061	0.424218	0.248247	-0.773026	0.56895	0.99965	NEUTRAL
XLOC_000105	ZBTB48	1	6580000	6589280	6.39377	6.30231	-0.0207849	0.9805	0.99965	NEUTRAL
XLOC_000106	PHF13	1	6590723	6624033	9.60358	9.13759	-0.0717576	0.94	0.99965	NEUTRAL
XLOC_000107	THAP3	1	6624865	6701924	5.91076	6.32988	0.0988356	0.9144	0.99965	NEUTRAL
XLOC_000109	CAMTA1	1	6785323	7769706	34.7033	28.3231	-0.29309	0.63935	0.99965	NEUTRAL
XLOC_000113	VAMP3	1	7771268	7781432	74.2114	73.2583	-0.0186484	0.9713	0.99965	NEUTRAL
XLOC_000114	RP3-467L1.6	1	7771268	7781432	0.558064	0.705314	0.337835	0.83985	0.99965	NEUTRAL
XLOC_000117	PARK7	1	7954290	7985505	169.544	175.82	0.0524391	0.92065	0.99965	NEUTRAL
XLOC_000121	SLC45A1	1	8317825	8344167	1.18568	1.70808	0.526657	0.55765	0.99965	NEUTRAL
XLOC_000128	Metazoa_SRP	1	8861001	8879894	0.443803	0.794301	0.839766	0.67975	0.99965	NEUTRAL
XLOC_000135	H6PD	1	9234774	9271337	10.6354	14.3001	0.427159	0.39335	0.99965	NEUTRAL
XLOC_000136	SPSB1	1	9292879	9369532	6.66068	5.00535	-0.412199	0.5251	0.99965	NEUTRAL
XLOC_000137	SLC25A33	1	9539481	9585179	2.18803	2.8428	0.37768	0.55005	0.99965	NEUTRAL
XLOC_000139	TMEM201	1	9588921	9614873	4.41044	4.92442	0.159034	0.7725	0.99965	NEUTRAL
XLOC_000140	PIK3CD	1	9651731	9824526	4.50546	4.22111	-0.094053	0.9619	0.99965	NEUTRAL
XLOC_000142	RP11-84A14.5	1	9848275	9910336	0.327409	0.468404	0.516661	0.76915	0.99965	NEUTRAL
XLOC_000144	NMNAT1	1	9922112	9985501	6.92561	6.99858	0.0151217	0.98575	0.99965	NEUTRAL
XLOC_000148	UBE4B	1	10032831	10181239	8.63008	7.57335	-0.188442	0.73155	0.99965	NEUTRAL
XLOC_000151	KIF1B	1	10210804	10381603	11.0404	10.6369	-0.0537198	0.92015	0.99965	NEUTRAL
XLOC_000154	PGD	1	10398591	10420144	75.0288	109.02	0.539076	0.29135	0.99965	NEUTRAL
XLOC_000155	APITD1,APITD1-CORT,CORT	1	10429880	10452153	5.51928	4.5401	-0.281757	0.72565	0.99965	NEUTRAL
XLOC_000156	RP5-1113E3.3	1	10456521	10630758	2.38598	2.82937	0.245898	0.85165	0.99965	NEUTRAL
XLOC_000157	PEX14	1	10456521	10630758	9.05123	8.20442	-0.141712	0.8707	0.99965	NEUTRAL
XLOC_000161	TARDBP	1	11012343	11047233	54.6485	58.3835	0.0953787	0.85875	0.99965	NEUTRAL
XLOC_000170	UBIAD1	1	11273205	11296049	3.51782	5.82457	0.727471	0.25065	0.99965	NEUTRAL
XLOC_000173	FBXO44	1	11648366	11663327	13.1214	16.4165	0.323219	0.56645	0.99965	NEUTRAL
XLOC_000174	FBXO6	1	11664123	11674354	3.52581	5.03393	0.513734	0.48555	0.99965	NEUTRAL
XLOC_000176	AGTRAP	1	11736083	11754802	28.5077	42.3481	0.570946	0.2652	0.99965	NEUTRAL
XLOC_000178	CLCN6	1	11761786	11848345	4.23594	4.06431	-0.0596719	0.9254	0.99965	NEUTRAL
XLOC_000181	PLOD1	1	11934204	11975538	168.304	124.313	-0.437086	0.439	0.99965	NEUTRAL
XLOC_000182	MFN2	1	11980180	12013514	22.7669	26.2026	0.202773	0.68405	0.99965	NEUTRAL
XLOC_000183	MIIP	1	12019465	12032045	5.30144	7.95722	0.58588	0.36365	0.99965	NEUTRAL
XLOC_000186	TNFRSF1B	1	12166942	12209228	2.22764	3.53053	0.664368	0.2977	0.99965	NEUTRAL
XLOC_000188	VPS13D	1	12230066	12512047	6.89794	5.24543	-0.395104	0.4713	0.99965	NEUTRAL
XLOC_000216	PRDM2	1	13700197	13825079	7.44327	5.49848	-0.436904	0.4079	0.99965	NEUTRAL
XLOC_000217	KAZN	1	14598703	15152464	2.14606	4.05507	0.918036	0.14715	0.99965	NEUTRAL
XLOC_000218	TMEM51	1	15152531	15220480	0.722004	0.425346	-0.76337	0.44625	0.99965	NEUTRAL
XLOC_000221	EFHD2	1	15409894	15430343	17.9081	15.7018	-0.189682	0.69865	0.99965	NEUTRAL
XLOC_000224	DNAJC16	1	15526812	15603626	8.48519	6.64308	-0.353094	0.6166	0.99965	NEUTRAL
XLOC_000227	DDI2,RSC1A1	1	15617499	15669044	5.25357	4.37095	-0.265353	0.6842	0.99965	NEUTRAL
XLOC_000228	PLEKHM2	1	15684331	15749896	20.8913	26.7921	0.358905	0.48365	0.99965	NEUTRAL
XLOC_000231	FBLIM1	1	15756606	15786594	60.7642	71.8548	0.241862	0.66125	0.99965	NEUTRAL
XLOC_000235	SPEN	1	15834478	15940460	6.27944	5.11694	-0.295354	0.6594	0.99965	NEUTRAL
XLOC_000245	SZRD1	1	16352574	16437424	45.5968	48.5214	0.0896901	0.8876	0.99965	NEUTRAL
XLOC_000247	NECAP2	1	16440671	16460078	23.6815	23.2482	-0.0266414	0.9586	0.99965	NEUTRAL
XLOC_000254	MST1P2	1	16645621	16650289	0.596441	0.533651	-0.160485	0.8631	0.99965	NEUTRAL
XLOC_000258	CROCC	1	16740272	16972979	4.97743	4.78026	-0.0583107	0.9537	0.99965	NEUTRAL
XLOC_000273	RP1-20B21.4	1	17406759	17439724	7.83096	8.03247	0.0366539	0.92255	0.99965	NEUTRAL
XLOC_000274	ARHGEF10L	1	17539834	17697874	9.05505	11.5	0.344841	0.48005	0.99965	NEUTRAL
XLOC_000287	MRTO4	1	19210500	19260128	12.2884	14.3324	0.221983	0.8957	0.99965	NEUTRAL
XLOC_000288	RP4-657E11.10	1	19297079	19297903	0.941328	0.909585	-0.0494882	0.9383	0.99965	NEUTRAL
XLOC_000289	PQLC2	1	19312325	19329300	5.9267	8.25826	0.478609	0.47595	0.99965	NEUTRAL
XLOC_000292	MINOS1,MINOS1-NBL1,NBL1	1	19596976	19658456	136.942	180.54	0.398749	0.594	0.99965	NEUTRAL
XLOC_000296	OTUD3	1	19882512	19912945	2.15914	2.07338	-0.0584756	0.9393	0.99965	NEUTRAL
XLOC_000307	PINK1	1	20633454	20661544	11.7381	18.3277	0.642829	0.7663	0.99965	NEUTRAL
XLOC_000317	NBPF3	1	21440127	21485005	3.29708	3.39849	0.0437062	0.94905	0.99965	NEUTRAL
XLOC_000330	LINC00339	1	22025187	22031223	6.51232	8.79865	0.434109	0.5713	0.99965	NEUTRAL
XLOC_000331	CDC42	1	22052626	22092946	89.6751	83.3875	-0.104875	0.84345	0.99965	NEUTRAL
XLOC_000335	ZBTB40	1	22451850	22531157	2.74749	2.20103	-0.319935	0.53755	0.99965	NEUTRAL
XLOC_000341	EPHB2	1	22710838	22921500	9.08551	6.94379	-0.387845	0.4785	0.99965	NEUTRAL
XLOC_000343	KDM1A	1	23019447	23177808	22.4423	21.8547	-0.0382768	0.961	0.99965	NEUTRAL
XLOC_000349	ZNF436-AS1	1	23359447	23371839	2.51756	1.55659	-0.693634	0.6534	0.99965	NEUTRAL
XLOC_000354	RPL11	1	23691778	23696425	673.786	770.223	0.192986	0.7339	0.99965	NEUTRAL
XLOC_000355	TCEB3	1	23743154	23778287	12.4264	10.5222	-0.239971	0.6745	0.99965	NEUTRAL
XLOC_000356	PITHD1	1	23778404	23788232	18.799	19.6099	0.0609301	0.9057	0.99965	NEUTRAL
XLOC_000357	LYPLA2	1	23790969	23795539	19.3515	20.2014	0.0620142	0.9132	0.99965	NEUTRAL
XLOC_000360	PNRC2	1	23959108	23963462	21.3224	20.5352	-0.0542745	0.9143	0.99965	NEUTRAL
XLOC_000366	NIPAL3	1	24307555	24472976	16.5911	12.7541	-0.379442	0.4582	0.99965	NEUTRAL
XLOC_000367	RCAN3	1	24502350	24556024	0.960778	1.07025	0.155679	0.8416	0.99965	NEUTRAL
XLOC_000370	SRRM1	1	24631715	24673267	22.3043	18.6109	-0.261176	0.59515	0.99965	NEUTRAL
XLOC_000377	TMEM50A	1	25242236	25430192	81.4752	74.7541	-0.124208	0.8617	0.99965	NEUTRAL
XLOC_000379	TMEM57	1	25430857	25500209	6.63207	5.37118	-0.30422	0.5911	0.99965	NEUTRAL
XLOC_000380	LDLRAP1	1	25543579	25568886	12.4324	12.6817	0.0286512	0.9514	0.99965	NEUTRAL
XLOC_000383	MTFR1L,RP1-317E23.6,SEPN1	1	25800175	25859458	53.3652	56.3763	0.0791907	0.88405	0.99965	NEUTRAL
XLOC_000392	EXTL1	1	26019883	26036464	3.74577	1.99261	-0.910606	0.1926	0.99965	NEUTRAL
XLOC_000394	PDIK1L	1	26111164	26125543	1.29492	0.730183	-0.826531	0.3517	0.99965	NEUTRAL
XLOC_000396	ZNF593	1	26169870	26172060	0.871858	1.01383	0.21765	0.8821	0.99965	NEUTRAL
XLOC_000400	CEP85	1	26234152	26279038	1.77735	2.104	0.243409	0.74895	0.99965	NEUTRAL
XLOC_000401	SH3BGRL3	1	26279175	26320523	255.662	233.41	-0.13137	0.8466	0.99965	NEUTRAL
XLOC_000405	DHDDS	1	26432281	26471294	11.4014	14.5861	0.355388	0.4693	0.99965	NEUTRAL
XLOC_000406	HMGN2	1	26472449	26475972	154.232	135.145	-0.190593	0.71305	0.99965	NEUTRAL
XLOC_000407	RPS6KA1	1	26529760	26575030	0.62579	0.426047	-0.554666	0.4412	0.99965	NEUTRAL
XLOC_000410	ARID1A	1	26696032	26782104	13.5151	12.755	-0.0835153	0.87445	0.99965	NEUTRAL
XLOC_000411	PIGV	1	26787471	26798398	4.58882	6.36452	0.471928	0.4475	0.99965	NEUTRAL
XLOC_000413	ZDHHC18	1	26826709	26857602	6.00455	5.46666	-0.135398	0.8632	0.99965	NEUTRAL
XLOC_000416	NUDC	1	26890487	26946862	21.9754	24.6675	0.166721	0.7485	0.99965	NEUTRAL
XLOC_000423	WDTC1	1	27234515	27308633	16.6599	18.1722	0.125354	0.8017	0.99965	NEUTRAL
XLOC_000425	TMEM222	1	27322144	27336400	19.6063	22.7172	0.212473	0.6873	0.99965	NEUTRAL
XLOC_000430	GPR3	1	27392643	27395814	0.52024	0.581531	0.16068	0.87635	0.99965	NEUTRAL
XLOC_000436	FAM76A	1	27725978	27763122	3.0717	2.57057	-0.256948	0.7659	0.99965	NEUTRAL
XLOC_000439	STX12	1	27773182	27824452	17.2682	18.4137	0.0926635	0.8418	0.99965	NEUTRAL
XLOC_000444	PPP1R8	1	27830777	27851676	16.0526	14.6877	-0.128192	0.8204	0.99965	NEUTRAL
XLOC_000446	THEMIS2	1	27872542	27886685	1.60327	1.79116	0.159878	0.84885	0.99965	NEUTRAL
XLOC_000448	XKR8	1	27934992	27968096	4.49377	5.69633	0.342107	0.5611	0.99965	NEUTRAL
XLOC_000451	ATPIF1	1	28236108	28246906	59.7485	50.9947	-0.228553	0.6811	0.99965	NEUTRAL
XLOC_000453	SESN2	1	28259526	28282491	12.4676	15.2244	0.288203	0.5711	0.99965	NEUTRAL
XLOC_000454	MED18	1	28329001	28335967	7.15349	8.24042	0.20407	0.74825	0.99965	NEUTRAL
XLOC_000455	PHACTR4	1	28369602	28500369	4.1945	4.64571	0.147401	0.7626	0.99965	NEUTRAL
XLOC_000458	RCC1	1	28505942	28539300	32.3497	64.0042	0.984414	0.2252	0.99965	NEUTRAL
XLOC_000461	TRNAU1AP	1	28553084	28582983	10.1226	10.1219	-8.72302e-05	0.99965	0.99965	NEUTRAL
XLOC_000462	RAB42	1	28589322	28643085	0.326029	0.493821	0.598988	0.75825	0.99965	NEUTRAL
XLOC_000465	GMEB1	1	28668731	28719353	2.96704	3.76597	0.343997	0.63315	0.99965	NEUTRAL
XLOC_000467	YTHDF2	1	28736620	28769775	25.6233	24.1175	-0.0873783	0.86445	0.99965	NEUTRAL
XLOC_000469	EPB41	1	28887090	29123935	3.32663	3.52565	0.0838279	0.9297	0.99965	NEUTRAL
XLOC_000473	PTPRU	1	29236515	29326813	8.92697	12.6414	0.501911	0.35445	0.99965	NEUTRAL
XLOC_000485	ZCCHC17	1	31296981	31364953	15.06	13.9663	-0.10877	0.8388	0.99965	NEUTRAL
XLOC_000486	SERINC2	1	31409564	31434680	120.38	104.745	-0.200715	0.71525	0.99965	NEUTRAL
XLOC_000492	RP11-73M7.6,RP11-73M7.9	1	31617685	31704319	1.29278	0.944439	-0.452948	0.6855	0.99965	NEUTRAL
XLOC_000495	KHDRBS1	1	32013828	32102866	30.7223	32.1112	0.0637892	0.9024	0.99965	NEUTRAL
XLOC_000496	TMEM39B	1	32013828	32102866	4.01304	3.9502	-0.0227689	0.98685	0.99965	NEUTRAL
XLOC_000498	KPNA6	1	32108037	32176568	15.5607	15.1498	-0.0386123	0.93685	0.99965	NEUTRAL
XLOC_000499	TXLNA	1	32179685	32198285	19.3883	21.5867	0.15496	0.75015	0.99965	NEUTRAL
XLOC_000500	CCDC28B	1	32200385	32208687	4.12137	4.21751	0.0332682	0.97195	0.99965	NEUTRAL
XLOC_000501	IQCC	1	32200385	32208687	0.960685	0.819415	-0.229468	0.8999	0.99965	NEUTRAL
XLOC_000503	EIF3I	1	32209093	32231604	86.9415	95.0386	0.128468	0.80555	0.99965	NEUTRAL
XLOC_000506	HDAC1	1	32292085	32333635	31.3829	23.7683	-0.40094	0.4055	0.99965	NEUTRAL
XLOC_000510	RP1-27O5.3,ZBTB8A,ZBTB8B	1	32465056	32650903	1.45323	1.41794	-0.0354635	0.9693	0.99965	NEUTRAL
XLOC_000512	RBBP4	1	32651141	32703596	32.7142	44.6004	0.447141	0.58815	0.99965	NEUTRAL
XLOC_000513	KIAA1522	1	32741884	32774970	8.07257	5.29674	-0.607925	0.2703	0.99965	NEUTRAL
XLOC_000514	S100PBP	1	32775236	32858879	7.47002	7.49366	0.00455854	0.99575	0.99965	NEUTRAL
XLOC_000519	AZIN2	1	33081103	33120530	1.55169	1.73205	0.158641	0.8217	0.99965	NEUTRAL
XLOC_000521	ZNF362	1	33256544	33300719	4.45361	6.26009	0.491208	0.3895	0.99965	NEUTRAL
XLOC_000523	RP11-415J8.3	1	33306765	33431052	1.88435	1.41432	-0.413956	0.68535	0.99965	NEUTRAL
XLOC_000526	ZSCAN20	1	33472644	33496507	1.15101	1.04486	-0.139593	0.865	0.99965	NEUTRAL
XLOC_000536	RP5-997D16.2	1	34712736	34859816	0.228766	0.44741	0.967726	0.7351	0.99965	NEUTRAL
XLOC_000538	ZMYM1	1	35059785	35115859	3.76424	2.46849	-0.608731	0.34905	0.99965	NEUTRAL
XLOC_000541	ZMYM4	1	35268966	35422058	8.32367	7.85226	-0.0841117	0.86355	0.99965	NEUTRAL
XLOC_000546	NCDN	1	35433489	35567274	10.6764	13.2583	0.312471	0.6689	0.99965	NEUTRAL
XLOC_000549	AGO4	1	35808171	35857890	2.11112	2.72623	0.368903	0.60295	0.99965	NEUTRAL
XLOC_000550	AGO1	1	35869807	35929610	2.3421	2.46456	0.0735249	0.89865	0.99965	NEUTRAL
XLOC_000551	AGO3	1	35930717	36072500	3.62736	3.52943	-0.039484	0.95735	0.99965	NEUTRAL
XLOC_000553	ADPRHL2	1	36088874	36093932	14.3731	13.3895	-0.102274	0.84995	0.99965	NEUTRAL
XLOC_000554	MAP7D1	1	36136569	36180849	50.6379	60.9772	0.268053	0.64585	0.99965	NEUTRAL
XLOC_000556	THRAP3	1	36224415	36305357	33.7071	27.2996	-0.30417	0.5566	0.99965	NEUTRAL
XLOC_000564	ZC3H12A	1	37474551	37484379	3.1721	2.67922	-0.243624	0.7339	0.99965	NEUTRAL
XLOC_000567	DNALI1	1	37556918	37595935	2.11497	2.61168	0.304339	0.8428	0.99965	NEUTRAL
XLOC_000570	MANEAL	1	37793801	37801137	0.41133	0.480011	0.222771	0.84255	0.99965	NEUTRAL
XLOC_000571	C1orf122	1	37802943	37809454	34.1079	37.3575	0.131294	0.8278	0.99965	NEUTRAL
XLOC_000578	UTP11L	1	38009257	38024824	12.9116	10.9553	-0.237044	0.72455	0.99965	NEUTRAL
XLOC_000579	RP5-884C9.2	1	38047313	38119025	0.507197	0.672775	0.407577	0.7441	0.99965	NEUTRAL
XLOC_000586	AKIRIN1	1	38991222	39006059	22.0641	22.5006	0.0282631	0.9569	0.99965	NEUTRAL
XLOC_000587	NDUFS5	1	39026317	39034636	149.837	160.499	0.0991738	0.83825	0.99965	NEUTRAL
XLOC_000588	MACF1	1	39081315	39487177	53.1577	35.5165	-0.581788	0.32325	0.99965	NEUTRAL
XLOC_000592	RP11-69E11.8	1	39560815	39576790	1.97498	2.55031	0.368839	0.8817	0.99965	NEUTRAL
XLOC_000594	PPIE	1	39692181	39788861	20.3338	21.778	0.0989945	0.8573	0.99965	NEUTRAL
XLOC_000598	MFSD2A	1	39955111	39969968	3.99274	5.65715	0.502699	0.4488	0.99965	NEUTRAL
XLOC_000600	CAP1	1	40040232	40072649	214.695	175.405	-0.291599	0.6168	0.99965	NEUTRAL
XLOC_000602	RLF	1	40161372	40240921	4.78078	2.75994	-0.79261	0.1379	0.99965	NEUTRAL
XLOC_000605	ZMPSTE24	1	40258106	40294184	37.6274	30.1803	-0.318176	0.51565	0.99965	NEUTRAL
XLOC_000606	SMAP2	1	40344849	40423326	9.70386	13.4983	0.476143	0.3398	0.99965	NEUTRAL
XLOC_000608	ZFP69B	1	40450101	40463718	0.643126	0.652628	0.0211593	0.982	0.99965	NEUTRAL
XLOC_000609	RP1-228H13.5	1	40464318	40466767	0.999296	0.993842	-0.00789645	0.9863	0.99965	NEUTRAL
XLOC_000611	ZFP69	1	40477214	40508661	1.09276	1.15057	0.0743711	0.93185	0.99965	NEUTRAL
XLOC_000612	EXO5	1	40508740	40517174	1.03546	1.7366	0.74599	0.42415	0.99965	NEUTRAL
XLOC_000613	ZNF684	1	40531560	40548169	1.57084	1.56259	-0.00759842	0.99425	0.99965	NEUTRAL
XLOC_000615	NFYC	1	40690379	40771603	10.8788	9.7836	-0.153076	0.78035	0.99965	NEUTRAL
XLOC_000622	CTPS1	1	40979334	41012565	22.9383	44.0862	0.942571	0.0902	0.99965	NEUTRAL
XLOC_000635	CCDC30,PPCS	1	42430328	42654664	22.7066	20.1982	-0.168882	0.7583	0.99965	NEUTRAL
XLOC_000639	PPIH	1	42658424	42676758	11.3836	8.79486	-0.37223	0.60855	0.99965	NEUTRAL
XLOC_000641	YBX1	1	42682426	42702349	342.037	358.243	0.0667836	0.91105	0.99965	NEUTRAL
XLOC_000642	C1orf50	1	42767268	42798230	4.71601	5.83757	0.307801	0.69835	0.99965	NEUTRAL
XLOC_000643	ERMAP	1	42807051	42846422	2.3498	2.3359	-0.00855491	0.9915	0.99965	NEUTRAL
XLOC_000644	ZNF691	1	42846572	42852477	1.73194	2.1051	0.281494	0.7332	0.99965	NEUTRAL
XLOC_000655	CDC20	1	43358954	43363203	0.495177	0.7792	0.654049	0.5362	0.99965	NEUTRAL
XLOC_000656	RP1-92O14.6	1	43383916	43389808	0.672952	0.80462	0.257803	0.84165	0.99965	NEUTRAL
XLOC_000657	SZT2	1	43389881	43456995	2.10652	2.21405	0.0718287	0.9055	0.99965	NEUTRAL
XLOC_000661	KDM4A	1	43650157	43931165	9.50284	10.7975	0.184263	0.7621	0.99965	NEUTRAL
XLOC_000662	ST3GAL3	1	43650157	43931165	11.2213	10.7879	-0.0568204	0.94485	0.99965	NEUTRAL
XLOC_000665	IPO13	1	43946938	43968022	8.75588	14.4917	0.726906	0.1422	0.99965	NEUTRAL
XLOC_000666	DPH2	1	43969999	43973369	7.83905	10.252	0.38715	0.5054	0.99965	NEUTRAL
XLOC_000667	ATP6V0B	1	43974486	43978295	80.6142	82.0683	0.0257911	0.961	0.99965	NEUTRAL
XLOC_000668	B4GALT2	1	43978942	43991170	38.5081	40.0652	0.0571862	0.9101	0.99965	NEUTRAL
XLOC_000669	CCDC24	1	43991358	44115913	1.24431	1.76441	0.503835	0.63955	0.99965	NEUTRAL
XLOC_000672	DMAP1	1	44213454	44220681	8.97135	10.3605	0.207691	0.7313	0.99965	NEUTRAL
XLOC_000674	RNF220	1	44405193	44674555	21.8416	24.1446	0.144622	0.7914	0.99965	NEUTRAL
XLOC_000677	KIF2C	1	44739817	44778779	0.32739	0.478134	0.546405	0.78185	0.99965	NEUTRAL
XLOC_000678	RPS8	1	44739817	44778779	838.619	927.192	0.144853	0.82445	0.99965	NEUTRAL
XLOC_000680	PLK3	1	44800224	44806675	17.0515	14.4208	-0.241746	0.6721	0.99965	NEUTRAL
XLOC_000681	BTBD19	1	44808481	44815585	3.19108	4.2795	0.423398	0.57735	0.99965	NEUTRAL
XLOC_000684	UROD	1	45012146	45015575	45.0136	56.4544	0.326724	0.49985	0.99965	NEUTRAL
XLOC_000687	TOE1	1	45329162	45491166	1.98948	1.8509	-0.104167	0.9151	0.99965	NEUTRAL
XLOC_000691	AKR1A1	1	45550542	45570049	17.2931	28.6709	0.72939	0.1866	0.99965	NEUTRAL
XLOC_000692	NASP	1	45583845	45618904	16.6557	14.3663	-0.21333	0.6932	0.99965	NEUTRAL
XLOC_000693	TMEM69	1	45627303	45750650	5.3402	5.59717	0.0678041	0.91785	0.99965	NEUTRAL
XLOC_000695	MAST2	1	45786986	46036124	12.9505	14.9617	0.208271	0.66375	0.99965	NEUTRAL
XLOC_000700	LURAP1	1	46188681	46221261	0.525601	0.621095	0.240847	0.87925	0.99965	NEUTRAL
XLOC_000702	UQCRH	1	46303630	46316776	176.509	152.374	-0.212129	0.66875	0.99965	NEUTRAL
XLOC_000703	NSUN4	1	46340176	46365152	5.71156	6.72485	0.235615	0.7719	0.99965	NEUTRAL
XLOC_000705	FAAH	1	46394264	46413848	2.34911	2.40397	0.033303	0.9749	0.99965	NEUTRAL
XLOC_000720	CMPK1	1	47333796	47378839	61.0207	52.873	-0.206767	0.6745	0.99965	NEUTRAL
XLOC_000748	CDKN2C	1	50960744	50974633	4.7125	5.41567	0.200646	0.78575	0.99965	NEUTRAL
XLOC_000754	RNF11	1	51236270	51273455	99.8552	66.4022	-0.588607	0.3496	0.99965	NEUTRAL
XLOC_000760	OSBPL9	1	51561865	51878937	20.3029	17.8568	-0.18521	0.8474	0.99965	NEUTRAL
XLOC_000767	RP11-91A18.4	1	52020130	52090716	1.13409	1.18017	0.0574556	0.9574	0.99965	NEUTRAL
XLOC_000769	BTF3L4	1	52020130	52090716	35.5669	35.5146	-0.0021219	0.99785	0.99965	NEUTRAL
XLOC_000770	ZFYVE9	1	52142093	52366193	5.73286	6.3075	0.137815	0.85435	0.99965	NEUTRAL
XLOC_000774	RP11-155O18.6	1	52142093	52366193	0.938354	1.06687	0.185182	0.8959	0.99965	NEUTRAL
XLOC_000776	PRPF38A	1	52404563	52553487	5.41341	6.61629	0.289485	0.75665	0.99965	NEUTRAL
XLOC_000779	GPX7	1	52602371	52609051	9.33009	15.0464	0.68945	0.245	0.99965	NEUTRAL
XLOC_000780	FAM159A	1	52633343	52669683	0.451044	0.654792	0.537767	0.70845	0.99965	NEUTRAL
XLOC_000783	ZYG11B	1	52726466	52827342	8.52025	6.83073	-0.318855	0.52	0.99965	NEUTRAL
XLOC_000786	RP4-631H13.6	1	52895909	52927212	1.69096	1.37786	-0.295413	0.66055	0.99965	NEUTRAL
XLOC_000787	SCP2	1	52927228	53051703	57.9957	65.2514	0.170063	0.76635	0.99965	NEUTRAL
XLOC_000794	CPT2	1	53196428	53220617	2.32308	2.71547	0.225165	0.8066	0.99965	NEUTRAL
XLOC_000804	LRRC42	1	53946076	53968168	17.5708	17.5716	6.70314e-05	0.9996	0.99965	NEUTRAL
XLOC_000805	TCEANC2	1	54053586	54112519	1.30999	0.727259	-0.849013	0.40625	0.99965	NEUTRAL
XLOC_000808	MRPL37	1	54133073	54413479	31.7072	47.1006	0.570932	0.3619	0.99965	NEUTRAL
XLOC_000816	MROH7,MROH7-TTC4,TTC4	1	54641753	54742657	10.4328	11.402	0.128157	0.82065	0.99965	NEUTRAL
XLOC_000819	RP11-67L3.4,RP11-67L3.5	1	54849632	54888850	2.78572	3.40784	0.290808	0.91105	0.99965	NEUTRAL
XLOC_000848	FGGY	1	59296637	59789182	4.08583	3.971	-0.0411254	0.96395	0.99965	NEUTRAL
XLOC_000858	INADL	1	61742476	62163920	2.062	1.19738	-0.784157	0.2551	0.99965	NEUTRAL
XLOC_000867	USP1	1	62436296	62451804	6.15364	5.04344	-0.287033	0.59685	0.99965	NEUTRAL
XLOC_000872	ATG4C	1	62784134	62865513	3.92355	3.94715	0.0086511	0.99035	0.99965	NEUTRAL
XLOC_000881	ALG6	1	63367589	63438562	3.37056	4.33788	0.364002	0.6085	0.99965	NEUTRAL
XLOC_000882	EFCAB7	1	63440769	63660245	1.66718	1.77532	0.0906725	0.96235	0.99965	NEUTRAL
XLOC_000883	PGM1	1	63440769	63660245	49.1038	59.1102	0.267573	0.6125	0.99965	NEUTRAL
XLOC_000885	ROR1	1	63774021	64181498	8.53068	7.72282	-0.143533	0.79175	0.99965	NEUTRAL
XLOC_000887	CACHD1	1	64470791	64693058	1.80274	1.88054	0.0609583	0.9227	0.99965	NEUTRAL
XLOC_000889	RAVER2	1	64745094	64966504	1.36931	2.17433	0.667128	0.80115	0.99965	NEUTRAL
XLOC_000892	AK4	1	65147548	65232145	21.7836	14.4464	-0.592539	0.29875	0.99965	NEUTRAL
XLOC_000897	PDE4B	1	65792513	66374579	6.57063	4.97577	-0.401113	0.4511	0.99965	NEUTRAL
XLOC_000898	SGIP1	1	66533382	66748299	1.89312	3.70249	0.96773	0.3518	0.99965	NEUTRAL
XLOC_000900	TCTEX1D1	1	66752458	66778787	1.09845	0.844747	-0.378874	0.70155	0.99965	NEUTRAL
XLOC_000902	MIER1	1	66924894	66988619	10.4984	8.90994	-0.236678	0.64625	0.99965	NEUTRAL
XLOC_000911	GADD45A	1	67685060	67688338	55.3616	71.1886	0.36276	0.46685	0.99965	NEUTRAL
XLOC_000923	SRSF11	1	70205681	70253052	42.7614	33.7672	-0.340686	0.51785	0.99965	NEUTRAL
XLOC_000924	HHLA3	1	70354804	70385339	7.81658	10.0778	0.366564	0.6366	0.99965	NEUTRAL
XLOC_000925	CTH	1	70411217	70439851	2.62	3.34156	0.350953	0.6636	0.99965	NEUTRAL
XLOC_000943	FPGT,FPGT-TNNI3K,TNNI3K	1	74198211	74544428	3.6611	2.59619	-0.495884	0.4032	0.99965	NEUTRAL
XLOC_000946	TYW3	1	74705481	74766678	7.59344	6.52221	-0.219394	0.76895	0.99965	NEUTRAL
XLOC_000953	ACADM,RABGGTB	1	75724346	75795079	89.5149	83.9499	-0.0925997	0.86505	0.99965	NEUTRAL
XLOC_000973	FAM73A	1	77779623	77879539	7.85847	6.12789	-0.358859	0.47285	0.99965	NEUTRAL
XLOC_000976	NEXN	1	77881347	77943895	21.3083	20.6819	-0.0430468	0.93245	0.99965	NEUTRAL
XLOC_000977	DNAJB4,GIPC2	1	77979174	78138449	109.109	82.6638	-0.400448	0.52465	0.99965	NEUTRAL
XLOC_000982	IFI44	1	78649795	78664078	4.17186	4.27851	0.0364173	0.96125	0.99965	NEUTRAL
XLOC_000996	ADGRL2	1	81306159	81992436	6.17742	6.27531	0.0226816	0.9719	0.99965	NEUTRAL
XLOC_001005	PRKACB	1	84078061	84238498	12.2868	9.23732	-0.411566	0.39585	0.99965	NEUTRAL
XLOC_001012	RPF1	1	84479258	84497790	13.5509	11.5606	-0.229173	0.67615	0.99965	NEUTRAL
XLOC_001014	WDR63	1	84999146	85133138	1.16486	1.08539	-0.101945	0.89645	0.99965	NEUTRAL
XLOC_001020	CYR61	1	85580760	85583962	930.622	718.634	-0.372939	0.679	0.99965	NEUTRAL
XLOC_001024	CLCA2	1	86424085	86456558	0.487388	0.665736	0.449881	0.6346	0.99965	NEUTRAL
XLOC_001028	SH3GLB1	1	86704569	86748184	43.1795	37.1814	-0.215766	0.7559	0.99965	NEUTRAL
XLOC_001030	HS2ST1,RP5-1052I5.2	1	86914647	87169204	11.9878	7.54156	-0.668628	0.2732	0.99965	NEUTRAL
XLOC_001034	LMO4	1	87328467	87348923	38.1701	48.491	0.345274	0.50865	0.99965	NEUTRAL
XLOC_001038	PKN2	1	88537512	88836255	10.3521	6.85821	-0.594012	0.275	0.99965	NEUTRAL
XLOC_001048	LRRC8C,LRRC8D,RP11-302M6.4	1	89524835	89936611	17.0656	15.5202	-0.13695	0.79675	0.99965	NEUTRAL
XLOC_001051	ZNF326	1	89995111	90035531	9.2818	9.78316	0.075897	0.89105	0.99965	NEUTRAL
XLOC_001057	CDC7	1	91500892	91525764	1.14823	0.923759	-0.313825	0.73425	0.99965	NEUTRAL
XLOC_001065	KIAA1107	1	92167051	92184723	0.769905	0.575786	-0.419149	0.61655	0.99965	NEUTRAL
XLOC_001069	RPAP2	1	92246401	92402056	4.04485	3.31356	-0.287702	0.82355	0.99965	NEUTRAL
XLOC_001072	RPL5	1	92832024	92961522	648.326	648.356	6.52948e-05	0.9995	0.99965	NEUTRAL
XLOC_001078	MTF2	1	93079234	93139081	3.63866	2.74052	-0.408953	0.5215	0.99965	NEUTRAL
XLOC_001079	CCDC18	1	93149741	93369498	6.5129	6.40563	-0.0239586	0.99265	0.99965	NEUTRAL
XLOC_001080	DR1	1	93149741	93369498	21.7531	19.2201	-0.178604	0.87775	0.99965	NEUTRAL
XLOC_001091	ABCD3	1	94418454	94518666	15.2541	10.8161	-0.496019	0.32755	0.99965	NEUTRAL
XLOC_001094	RP4-639F20.1	1	94927565	94963270	3.34981	2.10394	-0.670985	0.4675	0.99965	NEUTRAL
XLOC_001096	RWDD3,TMEM56,TMEM56-RWDD3	1	95117337	95278940	5.92571	5.28465	-0.165182	0.84515	0.99965	NEUTRAL
XLOC_001108	PTBP2	1	96721664	96823738	4.52222	2.87868	-0.651621	0.335	0.99965	NEUTRAL
XLOC_001111	DPYD-AS1	1	97077742	97921049	0.536091	0.333908	-0.683027	0.7106	0.99965	NEUTRAL
XLOC_001120	SNX7	1	98661700	98760500	27.8204	18.635	-0.578129	0.26065	0.99965	NEUTRAL
XLOC_001129	AGL	1	99850083	99924023	3.50765	3.11326	-0.172077	0.74305	0.99965	NEUTRAL
XLOC_001130	SLC35A3	1	99968382	100026979	5.95539	6.81832	0.195219	0.77905	0.99965	NEUTRAL
XLOC_001133	HIAT1	1	100038096	100132955	19.8539	16.957	-0.227536	0.6464	0.99965	NEUTRAL
XLOC_001135	TRMT13	1	100133149	100178273	3.75522	4.77478	0.346537	0.645	0.99965	NEUTRAL
XLOC_001139	RTCA	1	100266206	100292769	28.2355	24.5959	-0.199094	0.7014	0.99965	NEUTRAL
XLOC_001142	CDC14A	1	100351733	100520277	0.764674	0.552148	-0.46979	0.6069	0.99965	NEUTRAL
XLOC_001145	VCAM1	1	100719741	100739045	11.9393	6.22968	-0.938483	0.08685	0.99965	NEUTRAL
XLOC_001147	SLC30A7	1	100896075	100981753	5.88819	4.81606	-0.289969	0.56485	0.99965	NEUTRAL
XLOC_001149	RP11-421L21.3	1	100989622	101087268	3.52007	4.50634	0.356352	0.8103	0.99965	NEUTRAL
XLOC_001162	AMY2B,RNPC3	1	103525690	103579534	5.02738	3.52782	-0.511033	0.41795	0.99965	NEUTRAL
XLOC_001176	PRMT6	1	107056678	107059294	4.4145	4.94104	0.162565	0.79015	0.99965	NEUTRAL
XLOC_001182	RP11-483I13.5,RP11-483I13.6	1	108134035	108202743	1.13459	1.04681	-0.116165	0.7399	0.99965	NEUTRAL
XLOC_001188	FAM102B	1	108560088	108644900	1.00296	0.886068	-0.178773	0.80405	0.99965	NEUTRAL
XLOC_001189	PRPF38B	1	108692322	108701803	7.69765	5.09257	-0.596025	0.3125	0.99965	NEUTRAL
XLOC_001191	STXBP3	1	108746673	108809526	15.0006	9.61018	-0.642389	0.20185	0.99965	NEUTRAL
XLOC_001193	GPSM2	1	108815897	108963484	2.02403	1.12997	-0.840947	0.49975	0.99965	NEUTRAL
XLOC_001197	TMEM167B	1	109087970	109096934	26.862	23.4846	-0.193849	0.7261	0.99965	NEUTRAL
XLOC_001198	SCARNA2	1	109100192	109100619	1.1639	0.792328	-0.554794	0.70795	0.99965	NEUTRAL
XLOC_001200	SARS	1	109213917	109238169	101.07	118.628	0.231095	0.65975	0.99965	NEUTRAL
XLOC_001201	CELSR2	1	109250018	109275750	0.585452	0.328022	-0.835757	0.3045	0.99965	NEUTRAL
XLOC_001203	ATXN7L2	1	109483478	109492804	0.981648	1.12021	0.190491	0.8416	0.99965	NEUTRAL
XLOC_001204	CYB561D1	1	109494051	109502932	2.94185	3.50579	0.253018	0.64425	0.99965	NEUTRAL
XLOC_001206	AMPD2,GNAI3	1	109548610	109632051	24.842	22.9459	-0.114542	0.84475	0.99965	NEUTRAL
XLOC_001208	GSTM1,GSTM2,GSTM4	1	109656080	109709551	42.8898	52.3778	0.288321	0.5993	0.99965	NEUTRAL
XLOC_001212	CSF1	1	109910241	109930992	43.8945	66.3302	0.595625	0.24145	0.99965	NEUTRAL
XLOC_001213	AHCYL1	1	109984685	110023741	29.1135	34.862	0.259965	0.5913	0.99965	NEUTRAL
XLOC_001214	STRIP1	1	110031576	110074641	17.3842	14.6081	-0.251007	0.63735	0.99965	NEUTRAL
XLOC_001215	RP4-773N10.4	1	110031576	110074641	1.65865	1.39354	-0.25125	0.8449	0.99965	NEUTRAL
XLOC_001221	RBM15	1	110286374	110346681	1.66475	1.31331	-0.342092	0.6581	0.99965	NEUTRAL
XLOC_001222	LAMTOR5-AS1	1	110347115	110443817	0.766246	0.663864	-0.20692	0.7126	0.99965	NEUTRAL
XLOC_001230	RP11-96K19.5	1	110943466	110964649	0.50039	0.671979	0.425365	0.3335	0.99965	NEUTRAL
XLOC_001232	CEPT1	1	111117332	111185102	11.9622	13.0415	0.124616	0.89735	0.99965	NEUTRAL
XLOC_001233	CHI3L2	1	111187173	111243440	3.37805	4.06963	0.268705	0.7133	0.99965	NEUTRAL
XLOC_001242	ATP5F1	1	111438637	111462773	74.9787	81.1031	0.113276	0.861	0.99965	NEUTRAL
XLOC_001243	C1orf162	1	111473791	111478512	0.745498	0.390177	-0.934078	0.4396	0.99965	NEUTRAL
XLOC_001244	RAP1A	1	111483347	111768016	35.9759	31.9376	-0.171774	0.81595	0.99965	NEUTRAL
XLOC_001246	DDX20	1	111483347	111768016	4.68417	3.86692	-0.276611	0.8262	0.99965	NEUTRAL
XLOC_001251	CTTNBP2NL	1	112396180	112463456	11.153	10.0865	-0.145019	0.75595	0.99965	NEUTRAL
XLOC_001252	WNT2B	1	112466540	112671619	0.941412	0.919985	-0.0332163	0.97855	0.99965	NEUTRAL
XLOC_001253	CAPZA1	1	112466540	112671619	65.3035	60.3946	-0.11274	0.85	0.99965	NEUTRAL
XLOC_001254	MOV10	1	112673140	112700746	12.4733	13.7172	0.137141	0.81665	0.99965	NEUTRAL
XLOC_001262	LRIG2	1	113073208	113132260	2.99703	1.904	-0.654499	0.3033	0.99965	NEUTRAL
XLOC_001266	MAGI3	1	113390748	113685923	1.69602	1.1863	-0.515687	0.46245	0.99965	NEUTRAL
XLOC_001270	DCLRE1B	1	113761831	113914086	1.53989	1.82254	0.243126	0.82775	0.99965	NEUTRAL
XLOC_001271	HIPK1	1	113923999	113977869	10.6825	9.52804	-0.164999	0.7403	0.99965	NEUTRAL
XLOC_001289	VANGL1	1	115641952	115698224	4.63345	3.6061	-0.361648	0.5123	0.99965	NEUTRAL
XLOC_001292	SLC22A15	1	115976497	116070054	1.93727	2.73685	0.498493	0.43745	0.99965	NEUTRAL
XLOC_001296	ATP1A1	1	116372667	116418622	81.3903	86.6602	0.0905135	0.8775	0.99965	NEUTRAL
XLOC_001304	TTF2	1	117060302	117107453	5.32307	4.12544	-0.367708	0.7557	0.99965	NEUTRAL
XLOC_001308	MAN1A2	1	117367448	117528872	9.72893	8.39997	-0.211896	0.68455	0.99965	NEUTRAL
XLOC_001312	WDR3	1	117929719	118185223	9.78084	11.5725	0.242673	0.7979	0.99965	NEUTRAL
XLOC_001315	RP11-418J17.1	1	119031215	119327303	3.89517	5.72043	0.554438	0.5766	0.99965	NEUTRAL
XLOC_001333	NBPF8P	1	120436352	120467739	1.10449	1.17527	0.089613	0.89845	0.99965	NEUTRAL
XLOC_001338	NBPF26	1	120805417	120841481	0.916996	0.672437	-0.447516	0.59965	0.99965	NEUTRAL
XLOC_001340	LINC00623	1	120913150	121052167	0.786466	0.752687	-0.0633354	0.9592	0.99965	NEUTRAL
XLOC_001345	SRGAP2C	1	121167645	121463129	2.34115	1.83267	-0.353267	0.54495	0.99965	NEUTRAL
XLOC_001366	SRGAP2D	1	143975086	144068350	0.592929	0.535668	-0.146519	0.9056	0.99965	NEUTRAL
XLOC_001373	PFN1P6	1	144421385	144461674	1.81242	1.20416	-0.589885	0.7804	0.99965	NEUTRAL
XLOC_001388	GPR89A	1	145607989	145670648	2.51721	4.37495	0.797441	0.37705	0.99965	NEUTRAL
XLOC_001390	POLR3C	1	145824087	145842505	10.7711	11.4906	0.0932836	0.8724	0.99965	NEUTRAL
XLOC_001391	NUDT17	1	145845628	145859836	0.931253	0.66241	-0.491449	0.74655	0.99965	NEUTRAL
XLOC_001393	GNRHR2	1	145919012	145978848	0.383819	0.529161	0.463281	0.8102	0.99965	NEUTRAL
XLOC_001394	CH17-270A2.2,POLR3GL	1	145919012	145978848	15.4704	14.275	-0.116027	0.9411	0.99965	NEUTRAL
XLOC_001396	RP11-458D21.1	1	146052565	146061948	1.22034	1.36235	0.158814	0.8675	0.99965	NEUTRAL
XLOC_001406	NBPF12	1	146938743	146996202	1.41121	1.17699	-0.261827	0.70485	0.99965	NEUTRAL
XLOC_001409	CHD1L	1	147172770	147517875	13.3209	11.5932	-0.200413	0.7017	0.99965	NEUTRAL
XLOC_001411	PDIA3P1	1	147172770	147517875	0.597245	0.80974	0.439135	0.7	0.99965	NEUTRAL
XLOC_001417	BCL9	1	147541411	147626216	4.17055	2.55737	-0.705577	0.24745	0.99965	NEUTRAL
XLOC_001424	GPR89B	1	147928392	147993521	0.66431	0.399541	-0.733514	0.4165	0.99965	NEUTRAL
XLOC_001447	PDE4DIP	1	148808180	149048286	39.2509	56.8572	0.534618	0.3137	0.99965	NEUTRAL
XLOC_001448	RP4-791M13.3	1	149048575	149051273	0.841305	0.59041	-0.510913	0.66595	0.99965	NEUTRAL
XLOC_001450	RP11-326G21.1	1	149176021	149321732	0.423487	0.410598	-0.04459	0.793	0.99965	NEUTRAL
XLOC_001453	NBPF19	1	149390622	149556361	1.72033	1.46328	-0.233484	0.7437	0.99965	NEUTRAL
XLOC_001455	LINC00869	1	149606333	149747812	0.638825	0.95733	0.583596	0.4943	0.99965	NEUTRAL
XLOC_001463	RP11-196G18.24	1	149842187	149886652	2.17494	1.2244	-0.828905	0.38395	0.99965	NEUTRAL
XLOC_001468	BOLA1	1	149887523	149900798	3.44297	3.19845	-0.106283	0.9071	0.99965	NEUTRAL
XLOC_001470	VPS45	1	150067292	150145327	18.026	13.4688	-0.420462	0.46965	0.99965	NEUTRAL
XLOC_001471	PLEKHO1	1	150149182	150164720	21.9402	17.085	-0.360849	0.5203	0.99965	NEUTRAL
XLOC_001475	C1orf54	1	150265398	150280916	38.7342	31.1418	-0.314756	0.8222	0.99965	NEUTRAL
XLOC_001477	MRPS21	1	150293719	150308979	18.0819	21.1298	0.224733	0.6659	0.99965	NEUTRAL
XLOC_001478	PRPF3	1	150321475	150353195	9.2017	9.21239	0.00167473	0.99725	0.99965	NEUTRAL
XLOC_001479	RPRD2	1	150363090	150476566	6.83965	4.77813	-0.517476	0.32315	0.99965	NEUTRAL
XLOC_001480	TARS2	1	150487363	150507609	5.99879	5.92934	-0.0168009	0.9759	0.99965	NEUTRAL
XLOC_001483	ADAMTSL4	1	150548561	150579738	8.8818	4.74701	-0.903833	0.4998	0.99965	NEUTRAL
XLOC_001488	SETDB1	1	150926262	150975534	6.94014	6.25369	-0.150257	0.88605	0.99965	NEUTRAL
XLOC_001489	RP11-316M1.12	1	150926262	150975534	61.3761	75.2918	0.294815	0.8626	0.99965	NEUTRAL
XLOC_001492	PRUNE	1	151008419	151035713	5.88661	4.66919	-0.334266	0.5937	0.99965	NEUTRAL
XLOC_001494	C1orf56	1	151047739	151070325	0.904235	1.02869	0.186041	0.923	0.99965	NEUTRAL
XLOC_001495	MLLT11	1	151047739	151070325	6.14976	4.77265	-0.365739	0.72885	0.99965	NEUTRAL
XLOC_001496	GABPB2	1	151070577	151125542	0.958556	1.10469	0.204714	0.8074	0.99965	NEUTRAL
XLOC_001497	SCNM1,TNFAIP8L2	1	151156628	151195321	17.1269	21.2908	0.313969	0.71515	0.99965	NEUTRAL
XLOC_001498	PIP5K1A	1	151197948	151249536	21.1828	20.2043	-0.0682261	0.8929	0.99965	NEUTRAL
XLOC_001499	PSMD4	1	151254702	151267479	42.0007	42.5057	0.0172438	0.9703	0.99965	NEUTRAL
XLOC_001500	ZNF687	1	151280023	151327715	5.17266	4.91538	-0.0736024	0.9379	0.99965	NEUTRAL
XLOC_001504	PSMB4	1	151399533	151401944	132.884	130.958	-0.0210591	0.96735	0.99965	NEUTRAL
XLOC_001507	TUFT1	1	151540304	151583583	12.0203	9.37164	-0.359106	0.48685	0.99965	NEUTRAL
XLOC_001511	SNX27	1	151612037	151699091	5.13762	4.90646	-0.0664177	0.89125	0.99965	NEUTRAL
XLOC_001517	OAZ3	1	151755540	151794402	1.77824	1.65046	-0.107578	0.9569	0.99965	NEUTRAL
XLOC_001518	RP11-98D18.9	1	151755540	151794402	0.532801	0.321393	-0.729258	0.76005	0.99965	NEUTRAL
XLOC_001562	CHTOP	1	153618786	153646306	21.114	20.1469	-0.067641	0.93425	0.99965	NEUTRAL
XLOC_001563	SNAPIN	1	153658653	153671048	17.2158	18.7728	0.124911	0.92555	0.99965	NEUTRAL
XLOC_001566	INTS3,SLC27A3	1	153728066	153780157	11.3154	8.83861	-0.35639	0.518	0.99965	NEUTRAL
XLOC_001570	CREB3L4	1	153959098	153977688	1.14331	1.39609	0.28817	0.80625	0.99965	NEUTRAL
XLOC_001571	RP11-422P24.11	1	153977742	153979160	0.843592	0.601368	-0.488298	0.63865	0.99965	NEUTRAL
XLOC_001572	RPS27	1	153990758	153992150	1282.96	1227.97	-0.0632006	0.90995	0.99965	NEUTRAL
XLOC_001575	UBAP2L	1	154206705	154271510	46.7447	46.4201	-0.0100529	0.9867	0.99965	NEUTRAL
XLOC_001577	HAX1	1	154272510	154275875	33.0842	41.9344	0.341993	0.5215	0.99965	NEUTRAL
XLOC_001583	ATP8B2	1	154325552	154351307	21.5726	25.6838	0.251664	0.6303	0.99965	NEUTRAL
XLOC_001584	IL6R	1	154402327	154469450	0.4945	0.666142	0.429859	0.59485	0.99965	NEUTRAL
XLOC_001591	CKS1B	1	154974652	154979249	13.3988	12.8829	-0.0566414	0.93515	0.99965	NEUTRAL
XLOC_001593	FLAD1	1	154983337	154993111	10.038	13.9719	0.477058	0.3848	0.99965	NEUTRAL
XLOC_001595	ZBTB7B	1	155002629	155033781	12.8931	14.901	0.208811	0.71995	0.99965	NEUTRAL
XLOC_001596	ADAM15,DCST1	1	155033823	155062775	35.1341	35.8094	0.0274665	0.9556	0.99965	NEUTRAL
XLOC_001597	EFNA3,EFNA4,RP11-540D14.8	1	155063730	155087538	3.81828	3.52242	-0.116357	0.8824	0.99965	NEUTRAL
XLOC_001600	SLC50A1	1	155135343	155138857	23.2356	21.1681	-0.134442	0.81475	0.99965	NEUTRAL
XLOC_001602	TRIM46	1	155169407	155192916	0.955528	1.63187	0.772154	0.549	0.99965	NEUTRAL
XLOC_001604	AC234582.1	1	155169407	155192916	1.53287	1.69198	0.142472	0.89295	0.99965	NEUTRAL
XLOC_001607	MTX1	1	155195587	155227422	11.049	13.5588	0.295309	0.76115	0.99965	NEUTRAL
XLOC_001609	HCN3	1	155262867	155301434	0.957524	0.753976	-0.34479	0.8283	0.99965	NEUTRAL
XLOC_001610	FDPS	1	155308747	155331114	24.202	27.4765	0.183071	0.79115	0.99965	NEUTRAL
XLOC_001611	RUSC1	1	155308747	155331114	10.2984	12.95	0.330537	0.64295	0.99965	NEUTRAL
XLOC_001616	MSTO1	1	155609775	155739010	6.80308	6.97822	0.0366709	0.96995	0.99965	NEUTRAL
XLOC_001617	DAP3	1	155609775	155739010	30.9669	36.7488	0.246972	0.6985	0.99965	NEUTRAL
XLOC_001618	MSTO2P	1	155745828	155859400	0.520222	0.516031	-0.0116681	0.7423	0.99965	NEUTRAL
XLOC_001620	SYT11	1	155859508	155885199	25.6706	13.68	-0.908053	0.08495	0.99965	NEUTRAL
XLOC_001624	LAMTOR2	1	156054751	156058510	31.8908	38.8968	0.286512	0.61735	0.99965	NEUTRAL
XLOC_001627	LMNA	1	156082572	156140089	233.084	254.54	0.127041	0.832	0.99965	NEUTRAL
XLOC_001629	SLC25A44	1	156193931	156212796	5.99684	6.23764	0.0567982	0.91225	0.99965	NEUTRAL
XLOC_001630	BGLAP,PMF1,PMF1-BGLAP	1	156212981	156248117	22.632	19.286	-0.230813	0.67655	0.99965	NEUTRAL
XLOC_001631	TMEM79	1	156282934	156295689	1.69251	1.79945	0.0883886	0.9482	0.99965	NEUTRAL
XLOC_001638	APOA1BP	1	156591761	156594299	20.3472	31.6214	0.636073	0.21785	0.99965	NEUTRAL
XLOC_001642	RRNAD1	1	156721890	156736960	6.70366	7.17865	0.0987625	0.92135	0.99965	NEUTRAL
XLOC_001643	PRCC	1	156742106	156800817	21.2419	26.3846	0.312787	0.799	0.99965	NEUTRAL
XLOC_001645	PEAR1	1	156893697	156916434	14.6429	11.9011	-0.299105	0.54325	0.99965	NEUTRAL
XLOC_001655	KIRREL	1	157993272	158100262	34.7872	37.5779	0.111329	0.84495	0.99965	NEUTRAL
XLOC_001673	IFI16	1	158999967	159055155	24.4418	22.5915	-0.113572	0.8335	0.99965	NEUTRAL
XLOC_001693	LINC01133	1	159961217	159979061	8.1469	7.58176	-0.103719	0.8832	0.99965	NEUTRAL
XLOC_001700	PEA15	1	160202198	160215376	244.433	248.456	0.0235507	0.9759	0.99965	NEUTRAL
XLOC_001701	RP11-574F21.2	1	160215714	160286348	0.540187	0.31405	-0.782467	0.7565	0.99965	NEUTRAL
XLOC_001703	NCSTN	1	160289272	160358952	68.8387	67.6075	-0.0260359	0.9759	0.99965	NEUTRAL
XLOC_001707	RP11-404F10.2,SETP9	1	160670147	160711851	0.262977	0.472558	0.845553	0.3308	0.99965	NEUTRAL
XLOC_001718	NIT1	1	161100555	161132688	9.50666	12.8077	0.430004	0.6553	0.99965	NEUTRAL
XLOC_001719	UFC1	1	161152775	161159349	38.4445	50.379	0.390045	0.4817	0.99965	NEUTRAL
XLOC_001720	USP21	1	161159449	161165723	5.52378	6.37269	0.206245	0.75505	0.99965	NEUTRAL
XLOC_001721	PPOX	1	161166409	161178013	9.9826	7.56713	-0.399668	0.6354	0.99965	NEUTRAL
XLOC_001722	NDUFS2	1	161184307	161214395	27.9503	35.913	0.361642	0.5223	0.99965	NEUTRAL
XLOC_001723	FCER1G	1	161215233	161220699	0.496981	0.675847	0.443505	0.72765	0.99965	NEUTRAL
XLOC_001724	TOMM40L	1	161225938	161238302	3.70965	4.14487	0.160044	0.8375	0.99965	NEUTRAL
XLOC_001726	SDHC	1	161314256	161375340	105.462	106.351	0.0121087	0.9837	0.99965	NEUTRAL
XLOC_001736	DUSP12	1	161749757	161757238	11.3407	10.9535	-0.0501231	0.9316	0.99965	NEUTRAL
XLOC_001737	ATF6	1	161766293	161964070	8.63996	8.27423	-0.0624008	0.899	0.99965	NEUTRAL
XLOC_001745	UHMK1	1	162497250	162529629	20.7251	13.147	-0.656642	0.2104	0.99965	NEUTRAL
XLOC_001746	UAP1	1	162561505	162599842	72.3869	37.5347	-0.947503	0.06335	0.99965	NEUTRAL
XLOC_001748	DDR2	1	162631372	162787400	32.5203	37.3348	0.199181	0.7166	0.99965	NEUTRAL
XLOC_001750	HSD17B7	1	162790701	162812817	2.55561	1.45896	-0.808731	0.3539	0.99965	NEUTRAL
XLOC_001762	PBX1	1	164555583	164899296	1.92882	2.62244	0.443196	0.51915	0.99965	NEUTRAL
XLOC_001776	MGST3	1	165630860	165661796	78.5689	85.415	0.120531	0.82085	0.99965	NEUTRAL
XLOC_001783	UCK2	1	165724292	165911618	13.9482	14.8965	0.0948964	0.92755	0.99965	NEUTRAL
XLOC_001795	POGK	1	166839446	166856344	5.82074	6.04948	0.0556083	0.9119	0.99965	NEUTRAL
XLOC_001801	POU2F1	1	167220828	167427345	1.56544	1.52681	-0.0360481	0.95635	0.99965	NEUTRAL
XLOC_001806	MPZL1	1	167721191	167791919	78.08	118.093	0.596904	0.3684	0.99965	NEUTRAL
XLOC_001808	DCAF6	1	167916728	168075843	26.9762	26.5497	-0.0229915	0.9718	0.99965	NEUTRAL
XLOC_001810	TIPRL	1	168178932	168202114	14.4367	16.382	0.182371	0.77955	0.99965	NEUTRAL
XLOC_001813	SFT2D2	1	168225937	168253025	4.64335	7.45988	0.683986	0.2698	0.99965	NEUTRAL
XLOC_001814	TBX19	1	168281039	168314426	1.69581	2.51346	0.567702	0.4781	0.99965	NEUTRAL
XLOC_001824	ATP1B1	1	169105696	169367967	7.32738	7.76148	0.0830339	0.9004	0.99965	NEUTRAL
XLOC_001826	BLZF1	1	169367969	169460669	5.21155	4.5269	-0.203189	0.72785	0.99965	NEUTRAL
XLOC_001828	C1orf112	1	169662006	169894267	0.817685	0.95587	0.22527	0.87785	0.99965	NEUTRAL
XLOC_001836	GORAB	1	170460452	170553446	6.2711	4.56416	-0.45837	0.478	0.99965	NEUTRAL
XLOC_001838	PRRX1	1	170662727	170739419	56.3518	29.5816	-0.92976	0.07215	0.99965	NEUTRAL
XLOC_001846	FMO4	1	171314207	171342084	1.56734	1.80132	0.200729	0.8627	0.99965	NEUTRAL
XLOC_001849	PRRC2C	1	171485550	171593511	23.2786	21.2667	-0.130411	0.81635	0.99965	NEUTRAL
XLOC_001854	METTL13	1	171781663	171814023	7.90432	11.5141	0.542685	0.329	0.99965	NEUTRAL
XLOC_001860	SUCO	1	172532348	172611833	12.1826	7.36527	-0.726014	0.13715	0.99965	NEUTRAL
XLOC_001867	PRDX6	1	173477265	173488807	109.013	131.778	0.273608	0.6297	0.99965	NEUTRAL
XLOC_001870	KLHL20	1	173714940	173786702	6.05171	6.72375	0.151924	0.80885	0.99965	NEUTRAL
XLOC_001874	DARS2	1	173799549	173858546	1.73295	1.90289	0.134961	0.8589	0.99965	NEUTRAL
XLOC_001876	ZBTB37	1	173863247	173903549	0.603966	0.383376	-0.655708	0.80085	0.99965	NEUTRAL
XLOC_001879	RABGAP1L	1	174115299	174995308	6.59661	6.93341	0.0718404	0.90065	0.99965	NEUTRAL
XLOC_001885	CACYBP	1	174999162	175023425	25.4573	27.6521	0.11931	0.8576	0.99965	NEUTRAL
XLOC_001895	PAPPA2	1	176463170	176845605	0.722999	0.70433	-0.0377418	0.957	0.99965	NEUTRAL
XLOC_001902	RASAL2	1	178094140	178484147	5.61802	5.63419	0.00414476	0.9944	0.99965	NEUTRAL
XLOC_001910	FAM20B	1	179025803	179076562	10.1797	8.72081	-0.223167	0.65385	0.99965	NEUTRAL
XLOC_001911	TOR3A	1	179081376	179098023	11.2032	16.6487	0.5715	0.3741	0.99965	NEUTRAL
XLOC_001919	SOAT1	1	179293713	179358680	11.5892	11.8174	0.0281253	0.9707	0.99965	NEUTRAL
XLOC_001927	TOR1AIP1	1	179881606	179925000	26.6894	21.335	-0.323047	0.52515	0.99965	NEUTRAL
XLOC_001929	CEP350	1	179954737	180114880	6.84089	4.35226	-0.652418	0.2279	0.99965	NEUTRAL
XLOC_001932	QSOX1	1	180154833	180204030	365.191	260.8	-0.485707	0.5388	0.99965	NEUTRAL
XLOC_001937	XPR1	1	180632003	180890251	12.3188	10.8283	-0.186057	0.73285	0.99965	NEUTRAL
XLOC_001939	KIAA1614	1	180913153	181023121	1.3365	1.48216	0.149245	0.91505	0.99965	NEUTRAL
XLOC_001942	MR1	1	181033424	181061938	13.6413	15.558	0.189676	0.75515	0.99965	NEUTRAL
XLOC_001943	IER5	1	181088711	181092899	10.3888	7.08936	-0.551302	0.2725	0.99965	NEUTRAL
XLOC_001960	NPL	1	182789292	182830384	0.627107	0.702846	0.164496	0.88745	0.99965	NEUTRAL
XLOC_001961	DHX9	1	182839368	182887751	52.2986	45.3989	-0.204115	0.7015	0.99965	NEUTRAL
XLOC_001962	LAMC1	1	183023459	183145592	117.224	186.009	0.666105	0.32485	0.99965	NEUTRAL
XLOC_001963	LAMC2	1	183186237	183244900	0.783711	1.02204	0.383063	0.62045	0.99965	NEUTRAL
XLOC_001965	SMG7	1	183460873	183598246	12.7222	10.7016	-0.249518	0.62875	0.99965	NEUTRAL
XLOC_001966	RGL1	1	183636084	183928531	6.64552	5.87894	-0.176826	0.7265	0.99965	NEUTRAL
XLOC_001967	TSEN15	1	184051676	184074212	17.9445	17.8824	-0.00500324	0.99255	0.99965	NEUTRAL
XLOC_001971	C1orf21	1	184387057	184629020	24.6094	20.0916	-0.292613	0.6871	0.99965	NEUTRAL
XLOC_001975	RNF2	1	185045363	185102608	7.23801	5.21273	-0.473554	0.5014	0.99965	NEUTRAL
XLOC_001980	GS1-279B7.2	1	185317778	185318530	0.360451	0.70581	0.969479	0.5117	0.99965	NEUTRAL
XLOC_001987	C1orf27	1	186375757	186421378	5.84717	4.60759	-0.343725	0.5945	0.99965	NEUTRAL
XLOC_002025	TROVE2	1	193012249	193091777	12.2133	12.5886	0.0436587	0.9513	0.99965	NEUTRAL
XLOC_002026	CDC73	1	193122016	193253901	10.0981	8.58039	-0.234975	0.66745	0.99965	NEUTRAL
XLOC_002035	CFH	1	196651877	196747504	34.9503	62.5494	0.83969	0.1381	0.99965	NEUTRAL
XLOC_002047	C1orf53	1	197902646	197907367	7.00727	6.41637	-0.127094	0.8824	0.99965	NEUTRAL
XLOC_002070	CAMSAP2	1	200739557	200860704	14.3073	10.6472	-0.42628	0.39035	0.99965	NEUTRAL
XLOC_002081	RP11-134G8.5,RP11-134G8.6	1	201483529	201533608	0.332058	0.620553	0.902119	0.68445	0.99965	NEUTRAL
XLOC_002082	NAV1	1	201622884	201884294	34.7596	23.9728	-0.536018	0.40505	0.99965	NEUTRAL
XLOC_002086	IPO9	1	201622884	201884294	11.9884	17.5121	0.546716	0.63335	0.99965	NEUTRAL
XLOC_002088	SHISA4	1	201888679	201892306	40.7097	43.5248	0.0964659	0.85225	0.99965	NEUTRAL
XLOC_002090	TIMM17A	1	201955490	201970661	44.5185	37.4807	-0.248257	0.6142	0.99965	NEUTRAL
XLOC_002093	RNPEP	1	201982371	202017188	19.0574	19.3259	0.0201863	0.968	0.99965	NEUTRAL
XLOC_002107	PCAT6	1	202810953	202812156	4.44817	3.6732	-0.276174	0.7528	0.99965	NEUTRAL
XLOC_002112	TMEM183A	1	203007385	203024848	28.2103	31.1537	0.143181	0.79225	0.99965	NEUTRAL
XLOC_002113	PPFIA4	1	203026497	203078740	4.72321	3.14162	-0.58826	0.3509	0.99965	NEUTRAL
XLOC_002114	ADORA1	1	203090653	203167405	2.67774	5.02016	0.90672	0.1723	0.99965	NEUTRAL
XLOC_002117	BTG2	1	203305490	203309602	6.65698	6.22874	-0.0959283	0.8641	0.99965	NEUTRAL
XLOC_002118	PRELP	1	203475827	203491352	0.423925	0.574038	0.437337	0.6015	0.99965	NEUTRAL
XLOC_002120	ATP2B4	1	203626560	203744081	43.3418	23.8521	-0.861641	0.13585	0.99965	NEUTRAL
XLOC_002123	ZBED6,ZC3H11A	1	203795653	203854124	33.8835	23.217	-0.5454	0.30215	0.99965	NEUTRAL
XLOC_002124	SNRPE	1	203861602	203870550	64.4956	67.4356	0.0643101	0.90645	0.99965	NEUTRAL
XLOC_002127	RP11-74C13.4	1	204131061	204152003	0.911622	1.74468	0.936457	0.27745	0.99965	NEUTRAL
XLOC_002133	MDM4	1	204516378	204558120	2.47401	3.05869	0.306063	0.5765	0.99965	NEUTRAL
XLOC_002138	NFASC	1	204828650	205022822	71.7973	57.2041	-0.327811	0.5967	0.99965	NEUTRAL
XLOC_002139	RP11-494K3.2	1	204828650	205022822	0.746715	0.93062	0.317635	0.88615	0.99965	NEUTRAL
XLOC_002159	SRGAP2	1	206186178	206464443	16.0392	11.8636	-0.435068	0.4012	0.99965	NEUTRAL
XLOC_002160	IKBKE	1	206470475	206497728	4.42291	4.85454	0.134339	0.8808	0.99965	NEUTRAL
XLOC_002166	DYRK3	1	206634648	206684419	6.79704	5.18532	-0.390472	0.51245	0.99965	NEUTRAL
XLOC_002167	MAPKAPK2	1	206684943	206734283	38.1267	42.2546	0.148309	0.77315	0.99965	NEUTRAL
XLOC_002174	PFKFB2	1	207006844	207099993	1.44984	1.10681	-0.389495	0.62945	0.99965	NEUTRAL
XLOC_002179	CD55	1	207321507	207360966	12.2662	9.07648	-0.43448	0.49175	0.99965	NEUTRAL
XLOC_002185	CD46	1	207752056	207795513	43.5017	35.1242	-0.308608	0.55285	0.99965	NEUTRAL
XLOC_002196	G0S2	1	209661363	209734950	1.87087	3.49809	0.902856	0.36125	0.99965	NEUTRAL
XLOC_002200	DIEXF	1	209828006	209857565	5.01571	3.11392	-0.68772	0.20735	0.99965	NEUTRAL
XLOC_002204	HHAT	1	210328251	210676296	1.65341	1.57749	-0.0678142	0.9317	0.99965	NEUTRAL
XLOC_002208	RCOR3	1	211258376	211316385	8.47802	10.0295	0.242447	0.66665	0.99965	NEUTRAL
XLOC_002209	TRAF5	1	211326614	211374946	4.27539	6.21137	0.538856	0.33915	0.99965	NEUTRAL
XLOC_002210	LINC00467	1	211382802	211435333	1.35763	1.11795	-0.280233	0.7608	0.99965	NEUTRAL
XLOC_002223	PPP2R5A	1	212285536	212361863	9.22871	7.41518	-0.315647	0.54225	0.99965	NEUTRAL
XLOC_002228	NENF	1	212432886	212446379	35.9654	43.022	0.258464	0.61385	0.99965	NEUTRAL
XLOC_002230	ATF3	1	212565333	212620777	5.66195	4.07113	-0.47587	0.5245	0.99965	NEUTRAL
XLOC_002234	TATDN3	1	212791827	212816626	7.30195	6.57941	-0.150323	0.8485	0.99965	NEUTRAL
XLOC_002237	FLVCR1	1	212858254	212899363	3.04464	2.03277	-0.582823	0.61715	0.99965	NEUTRAL
XLOC_002239	RPS6KC1	1	213051232	213274773	7.8435	5.24961	-0.579287	0.28285	0.99965	NEUTRAL
XLOC_002243	SMYD2	1	214281101	214337131	6.8022	7.469	0.134914	0.8311	0.99965	NEUTRAL
XLOC_002245	CENPF	1	214603194	214664588	0.775572	1.30394	0.749538	0.57285	0.99965	NEUTRAL
XLOC_002248	KCNK2	1	215005774	215237093	43.7892	49.0929	0.16494	0.7606	0.99965	NEUTRAL
XLOC_002250	KCTD3	1	215567391	215621807	9.94783	10.1511	0.0291849	0.95565	0.99965	NEUTRAL
XLOC_002259	RRP15	1	218285286	218337983	6.62462	4.79849	-0.465258	0.6421	0.99965	NEUTRAL
XLOC_002261	TGFB2	1	218346234	218444619	46.7027	64.2366	0.45989	0.4856	0.99965	NEUTRAL
XLOC_002263	LYPLAL1	1	219086601	219212865	16.205	20.314	0.326039	0.6594	0.99965	NEUTRAL
XLOC_002269	IARS2	1	220094101	220148041	29.1806	25.1516	-0.214358	0.66685	0.99965	NEUTRAL
XLOC_002279	MARC2	1	220748224	220784815	3.2216	3.52301	0.129032	0.8837	0.99965	NEUTRAL
XLOC_002283	HLX	1	220832762	220885059	6.52236	7.18763	0.140121	0.8609	0.99965	NEUTRAL
XLOC_002288	TAF1A-AS1	1	222557901	222593032	0.360965	0.496645	0.460357	0.8282	0.99965	NEUTRAL
XLOC_002289	MIA3	1	222618085	222668012	25.7258	20.0863	-0.356999	0.5437	0.99965	NEUTRAL
XLOC_002290	BROX	1	222668012	222735196	12.7827	8.09611	-0.658896	0.5657	0.99965	NEUTRAL
XLOC_002299	CAPN2	1	223701592	223776018	146.335	126.498	-0.210167	0.7033	0.99965	NEUTRAL
XLOC_002301	RP11-504P24.3	1	223992742	224010612	1.46373	1.81539	0.310629	0.7548	0.99965	NEUTRAL
XLOC_002303	FBXO28	1	224114086	224162047	9.79348	7.03558	-0.477151	0.32855	0.99965	NEUTRAL
XLOC_002304	DEGS1	1	224175755	224193441	55.0657	61.5054	0.159559	0.7562	0.99965	NEUTRAL
XLOC_002309	CNIH4	1	224356849	224379459	29.8931	40.1702	0.426311	0.4703	0.99965	NEUTRAL
XLOC_002310	CNIH3	1	224385142	224740549	7.27486	4.01043	-0.859164	0.5101	0.99965	NEUTRAL
XLOC_002314	DNAH14	1	224896261	225399292	2.90564	2.72067	-0.0948943	0.91025	0.99965	NEUTRAL
XLOC_002315	RP11-145A3.1	1	225700603	225752243	0.712381	0.859352	0.270601	0.7852	0.99965	NEUTRAL
XLOC_002317	SRP9	1	225777812	225790466	90.6748	85.8342	-0.0791485	0.87215	0.99965	NEUTRAL
XLOC_002321	H3F3A	1	226060711	226072001	126.884	110.055	-0.205285	0.6784	0.99965	NEUTRAL
XLOC_002324	RP11-275I14.4	1	226144678	226186730	4.12193	2.65749	-0.633256	0.7824	0.99965	NEUTRAL
XLOC_002331	PSEN2	1	226870183	226896105	5.53079	5.18915	-0.0919868	0.8985	0.99965	NEUTRAL
XLOC_002332	ADCK3	1	226897535	226987545	3.49733	2.94262	-0.249153	0.7072	0.99965	NEUTRAL
XLOC_002333	RP5-1087E8.3	1	226989864	227318474	2.46646	3.39064	0.45912	0.8488	0.99965	NEUTRAL
XLOC_002342	ZNF678	1	227563542	227677443	1.32486	0.7324	-0.855132	0.47225	0.99965	NEUTRAL
XLOC_002344	SNAP47	1	227728538	227781231	9.61282	11.6817	0.281213	0.6747	0.99965	NEUTRAL
XLOC_002348	ARF1	1	228082659	228099212	247.178	265.93	0.105497	0.863	0.99965	NEUTRAL
XLOC_002350	GUK1	1	228139961	228148984	155.942	187.94	0.269261	0.60005	0.99965	NEUTRAL
XLOC_002352	IBA57	1	228165814	228182257	1.04197	1.15036	0.142778	0.8955	0.99965	NEUTRAL
XLOC_002353	OBSCN	1	228203505	228378876	0.506529	0.708388	0.483894	0.6213	0.99965	NEUTRAL
XLOC_002359	RNF187	1	228486187	228495766	41.8637	44.3302	0.0825912	0.8741	0.99965	NEUTRAL
XLOC_002363	FTH1P2	1	228687414	228687826	0.343359	0.490135	0.51346	0.7799	0.99965	NEUTRAL
XLOC_002369	RAB4A,SPHAR	1	229258280	229305894	22.5604	19.9247	-0.179231	0.7946	0.99965	NEUTRAL
XLOC_002376	URB2	1	229626233	229660199	2.42466	2.73612	0.174348	0.75785	0.99965	NEUTRAL
XLOC_002378	GALNT2	1	230057989	230282124	61.0003	47.8512	-0.350263	0.56285	0.99965	NEUTRAL
XLOC_002379	COG2	1	230642488	230693982	5.3004	5.047	-0.0706741	0.90165	0.99965	NEUTRAL
XLOC_002384	ARV1	1	230978980	231000595	9.55347	8.37332	-0.190225	0.756	0.99965	NEUTRAL
XLOC_002387	GNPAT	1	231241206	231277973	16.668	16.6282	-0.00345032	0.9935	0.99965	NEUTRAL
XLOC_002388	SPRTN	1	231332752	231355023	3.29382	3.25689	-0.0162664	0.9842	0.99965	NEUTRAL
XLOC_002389	DISC1,TSNAX,TSNAX-DISC1	1	231528652	232041272	15.4608	14.0355	-0.139533	0.84605	0.99965	NEUTRAL
XLOC_002400	NTPCR	1	232950604	233295727	23.5116	31.3591	0.415511	0.58885	0.99965	NEUTRAL
XLOC_002402	KCNK1	1	233614003	233672512	0.896679	0.977206	0.124071	0.8942	0.99965	NEUTRAL
XLOC_002410	COA6	1	234372185	234384049	10.1506	8.63953	-0.232537	0.765	0.99965	NEUTRAL
XLOC_002413	RP4-781K5.2	1	234604268	234609525	69.7392	85.1888	0.288694	0.80775	0.99965	NEUTRAL
XLOC_002422	GGPS1	1	235131182	235344532	13.1242	11.4871	-0.192213	0.84755	0.99965	NEUTRAL
XLOC_002425	TBCE	1	235367359	235448968	7.00288	7.22641	0.0453301	0.95075	0.99965	NEUTRAL
XLOC_002435	GPR137B	1	236142504	236281985	8.00177	7.26736	-0.138888	0.8177	0.99965	NEUTRAL
XLOC_002438	LGALS8	1	236517999	236604504	22.9341	17.8601	-0.360754	0.68165	0.99965	NEUTRAL
XLOC_002440	MTR	1	236795280	236903981	6.04107	5.26686	-0.197861	0.728	0.99965	NEUTRAL
XLOC_002454	FMN2	1	240014347	240475189	12.1106	6.12688	-0.98305	0.11525	0.99965	NEUTRAL
XLOC_002484	SDCCAG8	1	243256033	243851079	10.1851	6.38587	-0.673511	0.49055	0.99965	NEUTRAL
XLOC_002488	ZBTB18	1	244048938	244057476	4.96241	2.66887	-0.894813	0.1307	0.99965	NEUTRAL
XLOC_002494	DESI2	1	244652934	244709033	12.2549	13.494	0.138954	0.7761	0.99965	NEUTRAL
XLOC_002495	COX20	1	244835321	244864542	4.21785	3.20003	-0.398425	0.8222	0.99965	NEUTRAL
XLOC_002499	EFCAB2	1	244969349	245127164	4.78548	5.78314	0.273191	0.77735	0.99965	NEUTRAL
XLOC_002502	KIF26B	1	245154984	245709431	3.81463	4.16573	0.127024	0.80435	0.99965	NEUTRAL
XLOC_002508	CNST	1	246566443	246668584	9.86837	7.32247	-0.43048	0.4005	0.99965	NEUTRAL
XLOC_002512	SCCPDH	1	246724046	246768137	12.9076	10.9687	-0.234829	0.64785	0.99965	NEUTRAL
XLOC_002523	NLRP3	1	247416155	247449108	0.469282	0.497326	0.0837364	0.9314	0.99965	NEUTRAL
XLOC_002572	ZNF672	1	248838209	248849517	4.38596	3.71	-0.241474	0.67435	0.99965	NEUTRAL
XLOC_002574	PGBD2	1	248906195	248919946	1.67116	1.43311	-0.2217	0.7883	0.99965	NEUTRAL
XLOC_002576	WASH7P	1	11868	31109	0.570424	0.529177	-0.108284	0.92565	0.99965	NEUTRAL
XLOC_002579	RP11-34P13.7,RP11-34P13.8	1	89294	134836	0.850518	0.977363	0.200554	0.84885	0.99965	NEUTRAL
XLOC_002580	RP11-34P13.15	1	135140	135895	0.645507	0.632062	-0.0303669	0.93795	0.99965	NEUTRAL
XLOC_002581	RP11-34P13.16	1	137681	137965	2.4794	1.28974	-0.94291	0.5969	0.99965	NEUTRAL
XLOC_002583	RP11-34P13.13	1	141473	173862	1.63269	2.02095	0.307782	0.84175	0.99965	NEUTRAL
XLOC_002585	FO538757.2	1	184922	200322	1.18239	1.84151	0.63919	0.5111	0.99965	NEUTRAL
XLOC_002587	AP006222.2,RPL23AP21	1	257863	297502	0.733122	0.734229	0.00217703	0.9965	0.99965	NEUTRAL
XLOC_002590	RP4-669L17.10,RP4-669L17.4	1	357382	501617	2.67107	1.92688	-0.471154	0.66225	0.99965	NEUTRAL
XLOC_002600	RP11-206L10.1	1	726230	728147	0.67121	0.39026	-0.782331	0.502	0.99965	NEUTRAL
XLOC_002603	RP11-206L10.2,RP11-206L10.5	1	759031	778626	2.81961	2.00972	-0.488504	0.7836	0.99965	NEUTRAL
XLOC_002607	RP11-54O7.3	1	916864	921016	1.03872	0.898111	-0.209847	0.77215	0.99965	NEUTRAL
XLOC_002608	NOC2L	1	924879	959309	22.701	21.3039	-0.0916371	0.85275	0.99965	NEUTRAL
XLOC_002616	C1orf159	1	1081817	1116361	3.30173	2.43781	-0.437638	0.5273	0.99965	NEUTRAL
XLOC_002620	SDF4	1	1216907	1232031	142.156	135.451	-0.0697098	0.9016	0.99965	NEUTRAL
XLOC_002623	UBE2J2	1	1253908	1273885	24.7099	26.8869	0.121817	0.8254	0.99965	NEUTRAL
XLOC_002624	ACAP3	1	1292375	1324691	11.175	14.6655	0.392152	0.6486	0.99965	NEUTRAL
XLOC_002626	CPSF3L	1	1292375	1324691	32.7435	40.4404	0.30459	0.5981	0.99965	NEUTRAL
XLOC_002627	DVL1	1	1331313	1349350	23.733	27.157	0.194429	0.6998	0.99965	NEUTRAL
XLOC_002629	MXRA8	1	1352688	1361777	238.115	262.415	0.140193	0.8271	0.99965	NEUTRAL
XLOC_002630	AURKAIP1	1	1373729	1375495	31.541	40.9545	0.376793	0.47725	0.99965	NEUTRAL
XLOC_002631	CCNL2	1	1385710	1399328	46.6333	42.7489	-0.125475	0.8287	0.99965	NEUTRAL
XLOC_002632	MRPL20	1	1399521	1407313	48.0771	55.4113	0.204832	0.722	0.99965	NEUTRAL
XLOC_002635	TMEM240	1	1535173	1540453	1.23565	1.09776	-0.170714	0.8717	0.99965	NEUTRAL
XLOC_002636	SSU72	1	1541672	1574869	29.2815	33.7735	0.205904	0.70365	0.99965	NEUTRAL
XLOC_002639	C1orf233	1	1598011	1600096	2.22357	1.37798	-0.690321	0.3802	0.99965	NEUTRAL
XLOC_002640	RP11-345P4.9	1	1613757	1630610	0.925299	0.627713	-0.559815	0.75565	0.99965	NEUTRAL
XLOC_002641	CDK11A,CDK11B,SLC35E2	1	1632094	1745992	15.3497	12.9001	-0.250827	0.69275	0.99965	NEUTRAL
XLOC_002642	SLC35E2B	1	1632094	1745992	12.051	9.57159	-0.332326	0.55785	0.99965	NEUTRAL
XLOC_002643	NADK	1	1751231	1780457	15.6543	20.4679	0.386809	0.4835	0.99965	NEUTRAL
XLOC_002644	GNB1	1	1785284	1891117	158.792	159.54	0.00677872	0.9903	0.99965	NEUTRAL
XLOC_002650	C1orf86	1	2050469	2220738	31.1175	33.5542	0.108768	0.85225	0.99965	NEUTRAL
XLOC_002656	PEX10	1	2391774	2413797	9.27584	11.1256	0.262331	0.7883	0.99965	NEUTRAL
XLOC_002659	PANK4	1	2508532	2526600	9.04878	11.0962	0.294276	0.56365	0.99965	NEUTRAL
XLOC_002662	MMEL1	1	2586490	2801721	3.83032	5.19382	0.439332	0.8116	0.99965	NEUTRAL
XLOC_002666	LINC00982	1	3059614	3068437	0.856692	0.902163	0.0746113	0.9516	0.99965	NEUTRAL
XLOC_002672	WRAP73	1	3630766	3747336	7.12068	6.93203	-0.0387363	0.96655	0.99965	NEUTRAL
XLOC_002675	TP73-AS1	1	3630766	3747336	8.57541	9.6081	0.164046	0.8226	0.99965	NEUTRAL
XLOC_002676	LRRC47	1	3778557	3796504	13.3794	16.7756	0.32635	0.70725	0.99965	NEUTRAL
XLOC_002677	CEP104	1	3812080	3857214	9.75106	7.74203	-0.332848	0.57345	0.99965	NEUTRAL
XLOC_002678	C1orf174	1	3889124	3900293	6.73485	6.66863	-0.0142571	0.98205	0.99965	NEUTRAL
XLOC_002687	NPHP4	1	5862810	6101193	2.43348	2.68293	0.140791	0.83345	0.99965	NEUTRAL
XLOC_002690	RPL22	1	6181268	6235972	293.352	317.39	0.113621	0.91255	0.99965	NEUTRAL
XLOC_002692	ICMT	1	6181268	6235972	37.1252	42.1286	0.182401	0.88835	0.99965	NEUTRAL
XLOC_002694	ACOT7	1	6264268	6394391	29.2547	38.2366	0.386288	0.4365	0.99965	NEUTRAL
XLOC_002698	PLEKHG5,TNFRSF25	1	6424787	6520061	12.2802	9.82252	-0.322167	0.54525	0.99965	NEUTRAL
XLOC_002699	NOL9	1	6521346	6554535	2.84855	2.67071	-0.0930062	0.8821	0.99965	NEUTRAL
XLOC_002700	KLHL21	1	6590723	6624033	23.4274	22.0769	-0.085661	0.89305	0.99965	NEUTRAL
XLOC_002701	DNAJC11	1	6624865	6701924	6.71453	9.16137	0.448276	0.46525	0.99965	NEUTRAL
XLOC_002714	ERRFI1	1	8004403	8026308	95.1563	72.2653	-0.396996	0.49015	0.99965	NEUTRAL
XLOC_002719	RERE	1	8352396	8817643	31.5832	21.2889	-0.569051	0.29515	0.99965	NEUTRAL
XLOC_002725	ENO1	1	8861001	8879894	880.714	1028.92	0.224384	0.8014	0.99965	NEUTRAL
XLOC_002733	GPR157	1	9100304	9129170	1.53167	1.28701	-0.251089	0.7228	0.99965	NEUTRAL
XLOC_002735	RP3-510D11.1	1	9182006	9202619	0.594916	0.569797	-0.0622389	0.4485	0.99965	NEUTRAL
XLOC_002741	CLSTN1	1	9651731	9824526	66.6718	60.1067	-0.149551	0.7908	0.99965	NEUTRAL
XLOC_002743	CTNNBIP1	1	9848275	9910336	10.2062	10.2436	0.00527851	0.99465	0.99965	NEUTRAL
XLOC_002744	LZIC	1	9922112	9985501	10.0536	8.32389	-0.272381	0.7363	0.99965	NEUTRAL
XLOC_002747	DFFA	1	10456521	10630758	9.67139	11.8036	0.28743	0.7265	0.99965	NEUTRAL
XLOC_002753	MASP2	1	11012343	11047233	0.576194	0.406684	-0.502647	0.8477	0.99965	NEUTRAL
XLOC_002754	SRM	1	11054583	11060024	58.1298	73.3727	0.335965	0.4957	0.99965	NEUTRAL
XLOC_002755	EXOSC10	1	11066617	11102100	11.813	10.9846	-0.104895	0.82545	0.99965	NEUTRAL
XLOC_002756	MTOR	1	11106534	11262507	6.61127	8.29217	0.326823	0.57315	0.99965	NEUTRAL
XLOC_002759	FBXO2	1	11648366	11663327	0.479323	0.542514	0.178661	0.91185	0.99965	NEUTRAL
XLOC_002760	MAD2L2	1	11674479	11691650	18.1161	18.8087	0.054126	0.92295	0.99965	NEUTRAL
XLOC_002762	MTHFR	1	11761786	11848345	3.52802	4.31289	0.289796	0.78345	0.99965	NEUTRAL
XLOC_002766	KIAA2013	1	11919590	11926428	21.5116	20.1808	-0.0921372	0.8544	0.99965	NEUTRAL
XLOC_002775	DHRS3	1	12567909	12617731	67.1011	38.244	-0.811102	0.1052	0.99965	NEUTRAL
XLOC_002813	CASP9	1	15456727	15526534	3.15841	3.79434	0.264651	0.70715	0.99965	NEUTRAL
XLOC_002820	RP11-288I21.1	1	15684331	15749896	0.828339	0.841955	0.0235211	0.9853	0.99965	NEUTRAL
XLOC_002825	ZBTB17	1	15941868	15976132	7.68526	7.99436	0.0568899	0.9183	0.99965	NEUTRAL
XLOC_002828	HSPB7	1	16014027	16034050	46.5294	70.9097	0.607842	0.2647	0.99965	NEUTRAL
XLOC_002830	FAM131C	1	16057768	16073632	0.856554	0.493312	-0.796046	0.4477	0.99965	NEUTRAL
XLOC_002831	EPHA2	1	16124336	16157329	38.4701	31.8291	-0.27339	0.5715	0.99965	NEUTRAL
XLOC_002834	RSG1	1	16231699	16237162	3.40257	4.59405	0.433142	0.6779	0.99965	NEUTRAL
XLOC_002836	FBXO42	1	16246838	16352454	6.69623	7.85452	0.230173	0.761	0.99965	NEUTRAL
XLOC_002838	SPATA21	1	16352574	16437424	7.34117	8.50934	0.213038	0.8908	0.99965	NEUTRAL
XLOC_002843	NBPF1	1	16562318	16613562	12.1731	10.0279	-0.279675	0.66445	0.99965	NEUTRAL
XLOC_002844	CROCCP2	1	16618261	16644683	4.67883	4.7109	0.00985622	0.9855	0.99965	NEUTRAL
XLOC_002847	EIF1AXP1	1	16681096	16720157	1.72718	0.900219	-0.940072	0.47675	0.99965	NEUTRAL
XLOC_002849	MST1L	1	16740272	16972979	0.607449	0.506726	-0.261557	0.88545	0.99965	NEUTRAL
XLOC_002854	MFAP2	1	16974501	17011928	55.039	60.3606	0.133153	0.8517	0.99965	NEUTRAL
XLOC_002855	ATP13A2	1	16974501	17011928	14.3259	19.1011	0.415029	0.53925	0.99965	NEUTRAL
XLOC_002856	SDHB	1	17018721	17054170	52.729	56.443	0.0981986	0.85045	0.99965	NEUTRAL
XLOC_002859	RCC2	1	17406759	17439724	23.1272	24.0746	0.0579185	0.90575	0.99965	NEUTRAL
XLOC_002861	ALDH4A1,IFFO2,RP13-279N23.2,TAS1R2	1	18839598	18956686	13.3217	13.1306	-0.0208387	0.97085	0.99965	NEUTRAL
XLOC_002864	UBR4	1	19072109	19210276	32.2101	27.4915	-0.228526	0.7431	0.99965	NEUTRAL
XLOC_002865	EMC1	1	19210500	19260128	42.48	34.388	-0.304879	0.60415	0.99965	NEUTRAL
XLOC_002868	AKR7A2	1	19303964	19312146	15.947	21.3243	0.419213	0.41905	0.99965	NEUTRAL
XLOC_002870	CAPZB	1	19338775	19485539	195.723	220.112	0.169418	0.7603	0.99965	NEUTRAL
XLOC_002872	TMCO4	1	19682212	19799945	2.97295	4.42362	0.57333	0.3675	0.99965	NEUTRAL
XLOC_002882	CAMK2N1	1	20482390	20486220	15.4409	14.0063	-0.140681	0.7871	0.99965	NEUTRAL
XLOC_002883	MUL1	1	20499447	20508161	13.3885	13.7404	0.0374307	0.9389	0.99965	NEUTRAL
XLOC_002884	DDOST	1	20633454	20661544	165.163	137.126	-0.268387	0.6721	0.99965	NEUTRAL
XLOC_002888	HP1BP3	1	20742660	20787323	48.1902	31.6468	-0.60668	0.2827	0.99965	NEUTRAL
XLOC_002889	EIF4G3	1	20806291	21176888	16.3973	17.8082	0.119081	0.8165	0.99965	NEUTRAL
XLOC_002893	ECE1	1	21217246	21345504	28.476	22.4163	-0.345199	0.5298	0.99965	NEUTRAL
XLOC_002899	USP48	1	21678297	21783606	11.0127	11.9215	0.114395	0.821	0.99965	NEUTRAL
XLOC_002900	HSPG2	1	21812264	21937297	92.2746	97.9528	0.0861532	0.89655	0.99965	NEUTRAL
XLOC_002912	LUZP1	1	23019447	23177808	11.2829	8.20138	-0.460196	0.485	0.99965	NEUTRAL
XLOC_002915	LINC01355	1	23281308	23286752	0.525744	0.358726	-0.551479	0.5665	0.99965	NEUTRAL
XLOC_002916	HNRNPR	1	23303770	23344336	18.7244	21.8869	0.225153	0.6574	0.99965	NEUTRAL
XLOC_002917	ZNF436	1	23359447	23371839	4.89544	4.34478	-0.172153	0.76575	0.99965	NEUTRAL
XLOC_002918	RP5-1057J7.7	1	23378379	23379029	0.261842	0.425392	0.700095	0.68375	0.99965	NEUTRAL
XLOC_002919	TCEA3	1	23381060	23424740	9.03375	8.68114	-0.057441	0.9267	0.99965	NEUTRAL
XLOC_002920	ASAP3	1	23428562	23484568	6.03358	11.5585	0.937864	0.1144	0.99965	NEUTRAL
XLOC_002925	TCEB3-AS1	1	23743154	23778287	6.04849	6.15031	0.0240842	0.98515	0.99965	NEUTRAL
XLOC_002926	GALE	1	23795598	23800804	8.80789	8.2242	-0.0989204	0.87385	0.99965	NEUTRAL
XLOC_002927	HMGCL	1	23801884	23838620	16.1611	16.9572	0.0693721	0.8918	0.99965	NEUTRAL
XLOC_002928	FUCA1	1	23845076	23868294	22.5726	22.0216	-0.0356519	0.94565	0.99965	NEUTRAL
XLOC_002932	SRSF10	1	23964803	23980927	28.0194	24.4717	-0.195316	0.719	0.99965	NEUTRAL
XLOC_002939	STPG1	1	24307555	24472976	2.44026	3.05721	0.325182	0.7913	0.99965	NEUTRAL
XLOC_002943	RUNX3	1	24899510	24965121	1.69519	2.38402	0.49195	0.4745	0.99965	NEUTRAL
XLOC_002948	SYF2	1	25222678	25232502	19.9094	15.493	-0.361831	0.49395	0.99965	NEUTRAL
XLOC_002949	RSRP1	1	25242236	25430192	19.3598	12.5055	-0.630502	0.466	0.99965	NEUTRAL
XLOC_002951	SDHDP6	1	25242236	25430192	0.403627	0.51746	0.358426	0.844	0.99965	NEUTRAL
XLOC_002954	RP1-317E23.3	1	25800175	25859458	3.14048	5.19935	0.727345	0.75815	0.99965	NEUTRAL
XLOC_002955	AUNIP	1	25800175	25859458	11.5847	14.5104	0.324862	0.88755	0.99965	NEUTRAL
XLOC_002956	PAQR7	1	25859612	25871253	9.64789	11.612	0.267326	0.59455	0.99965	NEUTRAL
XLOC_002957	STMN1	1	25884180	25906991	36.1114	28.4426	-0.344401	0.52355	0.99965	NEUTRAL
XLOC_002958	PAFAH2	1	25959766	25998157	3.75583	3.37879	-0.152627	0.81775	0.99965	NEUTRAL
XLOC_002961	RP11-96L14.7	1	26169870	26172060	8.25559	9.37959	0.184153	0.85525	0.99965	NEUTRAL
XLOC_002964	UBXN11	1	26279175	26320523	12.4208	11.5738	-0.101891	0.944	0.99965	NEUTRAL
XLOC_002976	GPN2	1	26876132	26890297	9.26395	11.7163	0.338813	0.75475	0.99965	NEUTRAL
XLOC_002977	GPATCH3	1	26890487	26946862	3.13028	2.79557	-0.16315	0.914	0.99965	NEUTRAL
XLOC_002983	SLC9A1	1	27098814	27166981	12.5908	15.1664	0.268509	0.57245	0.99965	NEUTRAL
XLOC_002987	MAP3K6	1	27355183	27366892	7.24301	13.7998	0.929987	0.08395	0.99965	NEUTRAL
XLOC_002990	WASF2	1	27404225	27490158	27.6556	27.7568	0.00526752	0.9915	0.99965	NEUTRAL
XLOC_002991	AHDC1	1	27534034	27604431	3.23656	4.69521	0.53673	0.3155	0.99965	NEUTRAL
XLOC_002994	IFI6	1	27666060	27703063	10.3507	15.0382	0.538904	0.4204	0.99965	NEUTRAL
XLOC_002997	AL109927.1	1	27830777	27851676	11.31	9.15916	-0.304314	0.84995	0.99965	NEUTRAL
XLOC_002998	RPA2	1	27891523	27914746	10.69	11.4632	0.100749	0.85865	0.99965	NEUTRAL
XLOC_003000	EYA3	1	27970343	28088696	3.69985	2.71104	-0.448623	0.394	0.99965	NEUTRAL
XLOC_003008	DNAJC8	1	28199455	28233025	37.8876	35.3174	-0.101347	0.83435	0.99965	NEUTRAL
XLOC_003012	SNHG12,SNORA16A,SNORA44,SNORA61	1	28553084	28582983	12.837	10.9837	-0.224945	0.87205	0.99965	NEUTRAL
XLOC_003014	TAF12	1	28589322	28643085	10.2167	9.68366	-0.0773092	0.90025	0.99965	NEUTRAL
XLOC_003018	TMEM200B	1	28887090	29123935	5.36024	4.93113	-0.120381	0.861	0.99965	NEUTRAL
XLOC_003020	SRSF4	1	29147742	29181987	31.6768	28.7623	-0.139249	0.79655	0.99965	NEUTRAL
XLOC_003022	MECR	1	29192872	29230942	10.6076	17.2185	0.698861	0.3192	0.99965	NEUTRAL
XLOC_003032	LAPTM5	1	30732468	30757820	0.595619	0.734913	0.303184	0.7383	0.99965	NEUTRAL
XLOC_003036	SDC3	1	30869466	30908761	28.729	34.9253	0.281766	0.5943	0.99965	NEUTRAL
XLOC_003038	PUM1	1	30931505	31065991	18.5276	15.3801	-0.268613	0.5782	0.99965	NEUTRAL
XLOC_003042	SNRNP40	1	31259567	31296782	11.4262	13.6952	0.261324	0.62755	0.99965	NEUTRAL
XLOC_003046	AC114494.1	1	31409564	31434680	1.90411	1.50406	-0.340249	0.8814	0.99965	NEUTRAL
XLOC_003051	PEF1	1	31617685	31704319	39.6621	47.0254	0.24568	0.81955	0.99965	NEUTRAL
XLOC_003052	COL16A1	1	31617685	31704319	48.054	69.7236	0.536989	0.41295	0.99965	NEUTRAL
XLOC_003053	ADGRB2	1	31727116	31764893	6.42727	3.45219	-0.896693	0.14705	0.99965	NEUTRAL
XLOC_003055	SPOCD1	1	31789129	31816051	30.596	24.1483	-0.341421	0.47865	0.99965	NEUTRAL
XLOC_003058	PTP4A2	1	31842018	31944856	184.193	150.879	-0.28782	0.68835	0.99965	NEUTRAL
XLOC_003062	RP4-622L5.7	1	32200385	32208687	1.31061	1.11218	-0.236844	0.87295	0.99965	NEUTRAL
XLOC_003063	TMEM234	1	32209093	32231604	5.22808	6.62373	0.341362	0.78275	0.99965	NEUTRAL
XLOC_003064	MTMR9LP	1	32231657	32241620	0.600591	0.332577	-0.852694	0.43015	0.99965	NEUTRAL
XLOC_003067	MARCKSL1	1	32333831	32336379	15.8462	20.4194	0.365802	0.47915	0.99965	NEUTRAL
XLOC_003069	FAM229A	1	32351520	32364312	1.01406	0.523309	-0.954409	0.4241	0.99965	NEUTRAL
XLOC_003070	BSDC1	1	32365102	32394731	25.9775	19.4609	-0.416682	0.40225	0.99965	NEUTRAL
XLOC_003073	ZBTB8OS	1	32465056	32650903	9.0194	10.3643	0.200521	0.85325	0.99965	NEUTRAL
XLOC_003074	SYNC	1	32651141	32703596	41.8772	40.4686	-0.0493622	0.9414	0.99965	NEUTRAL
XLOC_003076	YARS	1	32775236	32858879	82.6562	110.492	0.418753	0.47335	0.99965	NEUTRAL
XLOC_003077	FNDC5	1	32862267	32872482	0.424495	0.601309	0.50236	0.64965	0.99965	NEUTRAL
XLOC_003078	TMEM54	1	32885993	32901438	17.4393	22.2025	0.348375	0.52245	0.99965	NEUTRAL
XLOC_003079	RNF19B	1	32936444	32964685	5.32963	4.56684	-0.22284	0.7268	0.99965	NEUTRAL
XLOC_003080	AK2	1	32986951	33080996	46.7259	47.6895	0.0294479	0.9641	0.99965	NEUTRAL
XLOC_003083	TRIM62	1	33145401	33182059	2.50307	2.50043	-0.00151904	0.9982	0.99965	NEUTRAL
XLOC_003085	PHC2	1	33306765	33431052	62.269	104.711	0.749827	0.19485	0.99965	NEUTRAL
XLOC_003095	SMIM12	1	34712736	34859816	10.5433	14.9584	0.504629	0.4302	0.99965	NEUTRAL
XLOC_003099	RP11-244H3.4,ZMYM6,ZMYM6NB	1	34974355	35031968	24.8458	25.7883	0.0537145	0.92985	0.99965	NEUTRAL
XLOC_003100	SFPQ	1	35176377	35193148	50.3553	53.3808	0.0841777	0.88885	0.99965	NEUTRAL
XLOC_003102	ZMYM4-AS1	1	35268966	35422058	2.16244	2.35032	0.120194	0.8903	0.99965	NEUTRAL
XLOC_003103	KIAA0319L	1	35433489	35567274	14.4276	11.7991	-0.290152	0.64305	0.99965	NEUTRAL
XLOC_003105	PSMB2	1	35599543	35641844	27.4893	36.0216	0.389994	0.4371	0.99965	NEUTRAL
XLOC_003106	C1orf216	1	35713874	35719472	10.6545	13.6347	0.355823	0.47815	0.99965	NEUTRAL
XLOC_003113	TRAPPC3	1	36136569	36180849	37.7795	43.4604	0.202098	0.8302	0.99965	NEUTRAL
XLOC_003115	EVA1B	1	36306386	36329221	24.8629	27.5471	0.147907	0.82085	0.99965	NEUTRAL
XLOC_003116	STK40	1	36339623	36385896	5.59919	5.50546	-0.0243533	0.9648	0.99965	NEUTRAL
XLOC_003117	LSM10	1	36391237	36397892	14.7697	14.5274	-0.0238635	0.9686	0.99965	NEUTRAL
XLOC_003119	OSCP1	1	36415826	36450451	3.03076	3.92241	0.372063	0.6325	0.99965	NEUTRAL
XLOC_003121	MRPS15	1	36455717	36464437	27.7626	31.0708	0.162416	0.7551	0.99965	NEUTRAL
XLOC_003128	LINC01137	1	37454878	37474411	0.515627	0.408339	-0.336562	0.7699	0.99965	NEUTRAL
XLOC_003129	MEAF6	1	37492574	37514774	24.5016	16.8039	-0.544076	0.3043	0.99965	NEUTRAL
XLOC_003131	SNIP1	1	37534448	37554302	2.84549	3.00398	0.0781961	0.88995	0.99965	NEUTRAL
XLOC_003132	GNL2	1	37556918	37595935	6.47717	6.23872	-0.0541123	0.9252	0.99965	NEUTRAL
XLOC_003134	C1orf109	1	37681569	37692249	11.228	10.4628	-0.101839	0.8724	0.99965	NEUTRAL
XLOC_003138	RP11-109P14.9	1	37793801	37801137	0.237328	0.463776	0.966546	0.53015	0.99965	NEUTRAL
XLOC_003139	YRDC	1	37802943	37809454	8.55132	7.83051	-0.127042	0.8957	0.99965	NEUTRAL
XLOC_003140	MTF1	1	37809566	37859620	3.2096	2.77209	-0.211417	0.6874	0.99965	NEUTRAL
XLOC_003141	INPP5B	1	37860696	37947057	4.85582	4.36813	-0.152698	0.7821	0.99965	NEUTRAL
XLOC_003142	SF3A3	1	37956974	37990921	18.7766	17.422	-0.108025	0.8402	0.99965	NEUTRAL
XLOC_003143	FHL3	1	37996769	38005606	12.8108	22.5258	0.814213	0.1316	0.99965	NEUTRAL
XLOC_003148	GJA9,MYCBP,RP5-864K19.6,RRAGC	1	38838197	38941799	24.0795	28.9941	0.267953	0.5896	0.99965	NEUTRAL
XLOC_003149	RHBDL2	1	38838197	38941799	0.857043	0.446254	-0.941503	0.6347	0.99965	NEUTRAL
XLOC_003156	PPIEL,RP11-69E11.4	1	39491645	39558707	2.97739	3.52941	0.245377	0.8326	0.99965	NEUTRAL
XLOC_003157	PABPC4	1	39560815	39576790	96.6272	115.197	0.253608	0.64845	0.99965	NEUTRAL
XLOC_003166	TRIT1	1	39841021	39883511	7.79937	8.41345	0.10934	0.85185	0.99965	NEUTRAL
XLOC_003170	PPT1	1	40072704	40097703	20.19	20.6727	0.0340869	0.94495	0.99965	NEUTRAL
XLOC_003176	RP11-656D10.5	1	40508740	40517174	0.952715	0.909912	-0.0663179	0.5561	0.99965	NEUTRAL
XLOC_003177	RP11-656D10.6	1	40508740	40517174	0.666986	0.968547	0.538165	0.41185	0.99965	NEUTRAL
XLOC_003187	SCMH1	1	41014589	41242154	9.69088	13.1278	0.437927	0.42395	0.99965	NEUTRAL
XLOC_003192	HIVEP3	1	41506364	42035925	3.84089	4.36259	0.183743	0.8055	0.99965	NEUTRAL
XLOC_003194	FOXJ3	1	42176538	42338376	9.9993	8.57075	-0.222405	0.65735	0.99965	NEUTRAL
XLOC_003200	P3H1	1	42746334	42767084	50.2123	42.8713	-0.228026	0.6478	0.99965	NEUTRAL
XLOC_003201	RP5-994D16.9	1	42767268	42798230	0.531334	0.511217	-0.0556818	0.7717	0.99965	NEUTRAL
XLOC_003202	CCDC23	1	42807051	42846422	4.63654	5.77734	0.317359	0.7965	0.99965	NEUTRAL
XLOC_003203	RP11-342M1.3	1	42807051	42846422	0.723477	0.647723	-0.159571	0.92615	0.99965	NEUTRAL
XLOC_003206	SLC2A1	1	42925374	42983358	145.369	134.725	-0.109696	0.85625	0.99965	NEUTRAL
XLOC_003207	EBNA1BP2	1	43164174	43274002	25.2198	22.1677	-0.186095	0.7142	0.99965	NEUTRAL
XLOC_003210	ELOVL1	1	43363396	43368074	68.1482	67.3979	-0.0159704	0.9749	0.99965	NEUTRAL
XLOC_003211	MED8	1	43383916	43389808	19.7766	20.3671	0.0424448	0.93155	0.99965	NEUTRAL
XLOC_003212	SZT2-AS1	1	43389881	43456995	0.871835	0.696937	-0.323027	0.85895	0.99965	NEUTRAL
XLOC_003214	KDM4A-AS1	1	43650157	43931165	6.23164	9.26247	0.571786	0.72645	0.99965	NEUTRAL
XLOC_003229	ERI3	1	44221069	44355260	20.6835	26.0695	0.333879	0.49885	0.99965	NEUTRAL
XLOC_003232	TMEM53	1	44405193	44674555	2.78598	3.96751	0.510049	0.7479	0.99965	NEUTRAL
XLOC_003241	EIF2B3	1	44850521	44986722	8.08733	9.74401	0.268853	0.6537	0.99965	NEUTRAL
XLOC_003244	HECTD3	1	45002539	45011329	10.1757	13.5799	0.416338	0.4253	0.99965	NEUTRAL
XLOC_003248	MUTYH	1	45329162	45491166	3.94668	3.92642	-0.00742546	0.99165	0.99965	NEUTRAL
XLOC_003250	CCDC163P	1	45493865	45523047	0.662076	0.375115	-0.819663	0.627	0.99965	NEUTRAL
XLOC_003251	PRDX1	1	45493865	45523047	203.031	213.144	0.0701311	0.89475	0.99965	NEUTRAL
XLOC_003257	GPBP1L1	1	45627303	45750650	21.2691	21.1754	-0.00637529	0.9916	0.99965	NEUTRAL
XLOC_003260	IPP	1	45627303	45750650	9.51936	9.3814	-0.0210612	0.9829	0.99965	NEUTRAL
XLOC_003264	POMGNT1	1	46188681	46221261	29.4138	31.6314	0.104865	0.8322	0.99965	NEUTRAL
XLOC_003265	LRRC41	1	46247687	46303608	33.8266	38.6419	0.192005	0.7148	0.99965	NEUTRAL
XLOC_003269	MKNK1,MOB3C	1	46538695	46616891	8.69897	11.1722	0.360991	0.4604	0.99965	NEUTRAL
XLOC_003270	ATPAF1	1	46632736	46673867	14.7064	13.8782	-0.0836221	0.87325	0.99965	NEUTRAL
XLOC_003271	EFCAB14	1	46674035	46719064	15.5836	10.6062	-0.555119	0.2787	0.99965	NEUTRAL
XLOC_003283	STIL	1	47250138	47314147	0.869514	0.82357	-0.0783181	0.92525	0.99965	NEUTRAL
XLOC_003285	FOXD2-AS1	1	47432132	47434641	0.522917	0.717427	0.456252	0.63905	0.99965	NEUTRAL
XLOC_003294	SPATA6	1	48295371	48472208	0.953144	1.09536	0.200638	0.8158	0.99965	NEUTRAL
XLOC_003306	FAF1	1	50437027	50960263	20.3313	21.2893	0.0664317	0.9143	0.99965	NEUTRAL
XLOC_003312	TTC39A	1	51287257	51345116	0.496252	0.481858	-0.0424651	0.95665	0.99965	NEUTRAL
XLOC_003313	EPS15	1	51354262	51561629	8.54822	8.34645	-0.0344613	0.9448	0.99965	NEUTRAL
XLOC_003318	NRD1	1	51561865	51878937	46.9957	47.2197	0.00686123	0.9903	0.99965	NEUTRAL
XLOC_003321	KTI12,TXNDC12	1	52020130	52090716	37.0486	34.3142	-0.110613	0.87325	0.99965	NEUTRAL
XLOC_003326	CC2D1B	1	52142093	52366193	10.1237	11.3261	0.161912	0.82	0.99965	NEUTRAL
XLOC_003328	ZCCHC11	1	52404563	52553487	8.23291	11.7502	0.513215	0.4819	0.99965	NEUTRAL
XLOC_003329	COA7	1	52684450	52698366	4.72057	6.7831	0.522984	0.43675	0.99965	NEUTRAL
XLOC_003333	ECHDC2	1	52895909	52927212	12.0391	17.2905	0.522256	0.41625	0.99965	NEUTRAL
XLOC_003341	RP5-1024G6.2	1	53196428	53220617	4.90417	2.81586	-0.800436	0.68325	0.99965	NEUTRAL
XLOC_003342	C1orf123	1	53196428	53220617	14.0345	20.1189	0.519579	0.4481	0.99965	NEUTRAL
XLOC_003343	MAGOH	1	53226891	53328070	21.0961	22.3353	0.0823497	0.91435	0.99965	NEUTRAL
XLOC_003344	LRP8	1	53226891	53328070	3.51959	2.82071	-0.319349	0.73825	0.99965	NEUTRAL
XLOC_003349	GLIS1	1	53506236	53738106	0.670607	1.19301	0.831071	0.36245	0.99965	NEUTRAL
XLOC_003351	NDC1	1	53765459	53838860	3.16099	3.3797	0.0965208	0.8649	0.99965	NEUTRAL
XLOC_003353	YIPF1	1	53851718	53889834	9.90871	11.3491	0.195808	0.73385	0.99965	NEUTRAL
XLOC_003354	HSPB11	1	53916573	53945929	8.89395	6.79149	-0.389097	0.60715	0.99965	NEUTRAL
XLOC_003357	TMEM59	1	54026680	54053504	246.614	169.238	-0.543203	0.41355	0.99965	NEUTRAL
XLOC_003361	SSBP3	1	54133073	54413479	11.3205	13.9236	0.298593	0.73415	0.99965	NEUTRAL
XLOC_003366	PARS2	1	54756897	54764514	1.56904	1.65638	0.0781501	0.92665	0.99965	NEUTRAL
XLOC_003368	DHCR24	1	54849632	54888850	23.9851	40.8822	0.769338	0.15115	0.99965	NEUTRAL
XLOC_003370	USP24	1	55066358	55215113	7.69522	7.01117	-0.134308	0.7988	0.99965	NEUTRAL
XLOC_003385	DAB1,OMA1	1	56929209	58546802	1.87628	3.0205	0.686914	0.3196	0.99965	NEUTRAL
XLOC_003394	MYSM1	1	58654738	58700092	5.8139	3.77388	-0.623455	0.30955	0.99965	NEUTRAL
XLOC_003412	TM2D1	1	61681045	61725423	28.9424	31.7607	0.134057	0.8293	0.99965	NEUTRAL
XLOC_003417	DOCK7	1	62454727	62688368	13.4279	11.6144	-0.209323	0.68305	0.99965	NEUTRAL
XLOC_003427	ITGB3BP	1	63440769	63660245	6.08103	4.09681	-0.569814	0.6038	0.99965	NEUTRAL
XLOC_003442	JAK1	1	64745094	64966504	33.8624	31.2082	-0.117757	0.8327	0.99965	NEUTRAL
XLOC_003461	WDR78	1	66812884	66924887	0.828155	0.986528	0.252459	0.7869	0.99965	NEUTRAL
XLOC_003462	SLC35D1	1	66999331	67054099	6.63043	6.06111	-0.129519	0.79615	0.99965	NEUTRAL
XLOC_003468	SERBP1	1	67407809	67430415	74.4195	85.8182	0.205602	0.7116	0.99965	NEUTRAL
XLOC_003471	GNG12	1	67701465	68233120	123.635	106.493	-0.215334	0.762	0.99965	NEUTRAL
XLOC_003473	DIRAS3	1	67701465	68233120	1.35706	0.916339	-0.566535	0.7997	0.99965	NEUTRAL
XLOC_003475	WLS	1	67701465	68233120	61.2801	73.6069	0.264422	0.8054	0.99965	NEUTRAL
XLOC_003487	LRRC40	1	69568397	70205620	4.56989	3.91455	-0.223314	0.7139	0.99965	NEUTRAL
XLOC_003490	ANKRD13C	1	70260587	70354734	7.80597	6.18523	-0.335752	0.52395	0.99965	NEUTRAL
XLOC_003497	ZRANB2	1	71048854	71081297	21.6812	19.5154	-0.151826	0.75925	0.99965	NEUTRAL
XLOC_003501	NEGR1	1	71081323	72282734	30.2089	33.473	0.148023	0.8017	0.99965	NEUTRAL
XLOC_003513	CRYZ	1	74705481	74766678	24.5781	15.2073	-0.692608	0.296	0.99965	NEUTRAL
XLOC_003525	PIGK	1	77088989	77219430	31.3081	18.9407	-0.725048	0.29655	0.99965	NEUTRAL
XLOC_003529	ZZZ3	1	77562415	77683419	18.545	13.2085	-0.489562	0.3373	0.99965	NEUTRAL
XLOC_003530	USP33	1	77695986	77759852	14.3432	15.5525	0.116777	0.8028	0.99965	NEUTRAL
XLOC_003534	FUBP1	1	77944054	77979110	25.1711	24.3706	-0.0466236	0.9278	0.99965	NEUTRAL
XLOC_003542	ADGRL4	1	78889763	79006718	24.3408	21.5288	-0.177107	0.75655	0.99965	NEUTRAL
XLOC_003563	GNG5	1	84498324	84574480	64.6158	66.1721	0.0343373	0.96335	0.99965	NEUTRAL
XLOC_003564	CTBS	1	84498324	84574480	32.6347	27.1188	-0.267111	0.70675	0.99965	NEUTRAL
XLOC_003567	SSX2IP	1	84643706	84690803	3.39786	2.15805	-0.654896	0.35745	0.99965	NEUTRAL
XLOC_003572	RP11-33E12.2	1	85152486	85154203	0.326867	0.513391	0.651357	0.5824	0.99965	NEUTRAL
XLOC_003573	SYDE2	1	85156872	85201046	0.724372	0.670141	-0.112268	0.90335	0.99965	NEUTRAL
XLOC_003574	C1orf52	1	85249952	85259672	15.1451	11.5023	-0.396936	0.5556	0.99965	NEUTRAL
XLOC_003576	DDAH1	1	85266247	85578363	62.794	66.4552	0.0817561	0.88365	0.99965	NEUTRAL
XLOC_003578	RP11-290M5.4	1	85578499	85578742	0.525394	0.464304	-0.178331	0.6925	0.99965	NEUTRAL
XLOC_003579	ZNHIT6	1	85649422	85708433	7.26519	7.036	-0.0462466	0.93115	0.99965	NEUTRAL
XLOC_003582	ODF2L	1	86346823	86396342	9.88627	10.5005	0.0869576	0.88595	0.99965	NEUTRAL
XLOC_003589	SEP15	1	86862444	86914424	137.974	109.617	-0.331925	0.52305	0.99965	NEUTRAL
XLOC_003600	GTF2B	1	88852931	88891944	12.765	6.53202	-0.966588	0.11145	0.99965	NEUTRAL
XLOC_003601	CCBL2,RBMXL1	1	88935772	88992960	18.3848	16.8571	-0.125154	0.82905	0.99965	NEUTRAL
XLOC_003602	GBP3	1	89006665	89022894	5.55145	4.19324	-0.404799	0.51065	0.99965	NEUTRAL
XLOC_003603	GBP1	1	89052318	89065360	7.17743	9.10159	0.34265	0.49135	0.99965	NEUTRAL
XLOC_003605	GBP2,GBP7	1	89106131	89176040	2.45035	3.40826	0.476049	0.51605	0.99965	NEUTRAL
XLOC_003620	ZNF644	1	90915297	91022272	7.73016	5.97354	-0.371912	0.6091	0.99965	NEUTRAL
XLOC_003623	TGFBR3	1	91680342	91906335	4.48757	3.79419	-0.242142	0.639	0.99965	NEUTRAL
XLOC_003628	GLMN	1	92246401	92402056	1.77336	2.01957	0.187563	0.8838	0.99965	NEUTRAL
XLOC_003631	EVI5	1	92508695	92792404	6.46812	4.23696	-0.610319	0.3149	0.99965	NEUTRAL
XLOC_003636	FAM69A	1	92832024	92961522	10.7465	12.1279	0.174469	0.9476	0.99965	NEUTRAL
XLOC_003640	TMED5	1	93149741	93369498	30.1982	21.5612	-0.486022	0.55295	0.99965	NEUTRAL
XLOC_003643	RP4-717I23.3	1	93149741	93369498	6.30328	5.39251	-0.225145	0.77575	0.99965	NEUTRAL
XLOC_003647	BCAR3	1	93561785	93847150	23.3113	20.2572	-0.202594	0.6849	0.99965	NEUTRAL
XLOC_003649	DNTTIP2	1	93866282	93879918	14.0525	11.4679	-0.293228	0.6085	0.99965	NEUTRAL
XLOC_003650	GCLM	1	93885204	93909456	20.131	38.3363	0.929294	0.16225	0.99965	NEUTRAL
XLOC_003660	ARHGAP29	1	94148987	94275068	20.0185	12.8825	-0.635919	0.1892	0.99965	NEUTRAL
XLOC_003663	F3	1	94529224	94541800	1.02263	2.01272	0.976859	0.27165	0.99965	NEUTRAL
XLOC_003670	CNN3	1	94896948	94927278	212.373	155.766	-0.447224	0.4161	0.99965	NEUTRAL
XLOC_003671	ALG14	1	94974406	95072945	5.49191	5.95406	0.116564	0.9085	0.99965	NEUTRAL
XLOC_003683	DPYD	1	97077742	97921049	8.44373	9.5993	0.185049	0.7183	0.99965	NEUTRAL
XLOC_003685	RP11-272L13.3	1	97933473	97941746	0.720094	0.766461	0.0900269	0.94345	0.99965	NEUTRAL
XLOC_003691	FRRS1	1	99708702	99766631	0.514169	0.360081	-0.513921	0.6688	0.99965	NEUTRAL
XLOC_003693	RP5-884G6.2	1	99968382	100026979	0.431963	0.421152	-0.0365663	0.86545	0.99965	NEUTRAL
XLOC_003695	SASS6	1	100038096	100132955	0.564613	0.371562	-0.60366	0.75065	0.99965	NEUTRAL
XLOC_003697	DBT	1	100186918	100249834	2.6889	2.73065	0.0222296	0.97275	0.99965	NEUTRAL
XLOC_003705	EXTL2	1	100872371	100895998	12.3793	10.1498	-0.286477	0.5702	0.99965	NEUTRAL
XLOC_003707	DPH5	1	100989622	101087268	13.567	15.326	0.175885	0.77595	0.99965	NEUTRAL
XLOC_003730	SLC25A24	1	108134035	108202743	10.853	9.8099	-0.145783	0.78065	0.99965	NEUTRAL
XLOC_003737	AKNAD1,CLCC1,RP11-475E11.9	1	108815897	108963484	15.3066	14.2741	-0.10076	0.85645	0.99965	NEUTRAL
XLOC_003738	WDR47	1	108970213	109042113	4.93314	4.04507	-0.28634	0.5956	0.99965	NEUTRAL
XLOC_003740	TAF13	1	109062485	109076002	47.9818	44.0357	-0.123814	0.8069	0.99965	NEUTRAL
XLOC_003744	PSRC1	1	109279555	109283186	2.38649	3.23545	0.439079	0.6168	0.99965	NEUTRAL
XLOC_003747	PSMA5	1	109399030	109426427	29.3253	31.0637	0.0830836	0.8656	0.99965	NEUTRAL
XLOC_003748	AMIGO1	1	109504174	109509738	1.61909	0.959165	-0.755333	0.34195	0.99965	NEUTRAL
XLOC_003752	RP5-1160K1.6	1	109548610	109632051	2.50876	1.26449	-0.988415	0.7407	0.99965	NEUTRAL
XLOC_003753	AC000032.2	1	109656080	109709551	3.8992	4.88083	0.323948	0.60265	0.99965	NEUTRAL
XLOC_003754	GSTM3	1	109712254	109775428	36.1414	43.732	0.275034	0.62815	0.99965	NEUTRAL
XLOC_003758	ALX3	1	110031576	110074641	1.4723	1.11469	-0.401428	0.4036	0.99965	NEUTRAL
XLOC_003764	LAMTOR5	1	110347115	110443817	79.4129	78.0197	-0.0255343	0.9622	0.99965	NEUTRAL
XLOC_003774	LRIF1	1	110943466	110964649	4.07347	3.22574	-0.336628	0.6301	0.99965	NEUTRAL
XLOC_003776	DRAM2	1	111117332	111185102	26.5537	22.3882	-0.246175	0.7034	0.99965	NEUTRAL
XLOC_003778	RP5-1180E21.5	1	111117332	111185102	9.66076	11.3842	0.236825	0.90125	0.99965	NEUTRAL
XLOC_003779	DENND2D	1	111187173	111243440	1.08818	2.13946	0.975334	0.47555	0.99965	NEUTRAL
XLOC_003784	RP11-552M11.8	1	111431045	111433068	0.477761	0.384167	-0.314556	0.78715	0.99965	NEUTRAL
XLOC_003785	WDR77	1	111438637	111462773	7.8805	11.3669	0.52848	0.59355	0.99965	NEUTRAL
XLOC_003791	FAM212B	1	111483347	111768016	6.28363	4.10425	-0.614481	0.52835	0.99965	NEUTRAL
XLOC_003797	ST7L	1	112466540	112671619	8.70993	7.55483	-0.205263	0.8079	0.99965	NEUTRAL
XLOC_003801	PPM1J,RHOC,RP11-426L16.10	1	112701105	112715477	265.826	312.938	0.235393	0.693	0.99965	NEUTRAL
XLOC_003804	SLC16A1	1	112911846	112999496	18.7125	17.1898	-0.122451	0.80855	0.99965	NEUTRAL
XLOC_003806	RLIMP2	1	113073208	113132260	1.51209	1.61853	0.0981432	0.95815	0.99965	NEUTRAL
XLOC_003808	PHTF1	1	113696830	113759489	6.47911	5.64934	-0.197713	0.7886	0.99965	NEUTRAL
XLOC_003809	RP4-730K3.3	1	113696830	113759489	1.08878	0.568465	-0.937573	0.6152	0.99965	NEUTRAL
XLOC_003810	RSBN1	1	113761831	113914086	4.08752	2.79728	-0.547198	0.53795	0.99965	NEUTRAL
XLOC_003811	PTPN22	1	113761831	113914086	1.53856	1.37836	-0.158634	0.9243	0.99965	NEUTRAL
XLOC_003813	AP4B1	1	113761831	113914086	4.83347	6.47681	0.422222	0.60975	0.99965	NEUTRAL
XLOC_003819	TRIM33	1	114392776	114511160	6.80967	4.74205	-0.522074	0.3445	0.99965	NEUTRAL
XLOC_003820	BCAS2	1	114567556	114581639	19.1216	15.5008	-0.30286	0.58255	0.99965	NEUTRAL
XLOC_003821	DENND2C	1	114582847	114670422	0.641266	0.527494	-0.281767	0.75465	0.99965	NEUTRAL
XLOC_003824	CSDE1,NRAS	1	114704468	114758676	207.915	207.518	-0.00275895	0.9967	0.99965	NEUTRAL
XLOC_003825	SIKE1	1	114769478	114780685	13.6934	12.2841	-0.156687	0.83665	0.99965	NEUTRAL
XLOC_003826	TSPAN2	1	115048010	115089500	2.62934	1.34003	-0.972441	0.34555	0.99965	NEUTRAL
XLOC_003834	ATP1A1-AS1	1	116372667	116418622	1.8155	1.99215	0.133957	0.92885	0.99965	NEUTRAL
XLOC_003839	CD58	1	116514534	116571039	5.76689	3.73697	-0.625925	0.46315	0.99965	NEUTRAL
XLOC_003850	TRIM45	1	117111059	117122587	0.883066	0.816934	-0.112301	0.88615	0.99965	NEUTRAL
XLOC_003859	GDAP2	1	117863484	117929630	4.9565	4.64153	-0.0947213	0.9064	0.99965	NEUTRAL
XLOC_003863	TBX15	1	118883045	118989556	7.93026	12.245	0.626758	0.2278	0.99965	NEUTRAL
XLOC_003865	WARS2	1	119031215	119327303	4.10724	5.51843	0.426089	0.56725	0.99965	NEUTRAL
XLOC_003878	ZNF697	1	119619421	119647773	3.58788	3.1897	-0.169713	0.755	0.99965	NEUTRAL
XLOC_003883	RP5-1042I8.7	1	119909254	119910613	2.40804	1.22655	-0.973253	0.2835	0.99965	NEUTRAL
XLOC_003884	NOTCH2	1	119911552	120069626	86.206	60.5102	-0.510609	0.45845	0.99965	NEUTRAL
XLOC_003885	SEC22B	1	120150897	120176515	25.4123	32.0962	0.33688	0.531	0.99965	NEUTRAL
XLOC_003888	PFN1P2	1	120432203	120434052	2.20356	1.60893	-0.45374	0.56915	0.99965	NEUTRAL
XLOC_003889	CH17-472G23.4	1	120489624	120579190	1.85395	1.89672	0.0329096	0.9549	0.99965	NEUTRAL
XLOC_003906	CH17-13I23.3	1	143419624	143420207	1.56816	2.017	0.363136	0.81585	0.99965	NEUTRAL
XLOC_003920	HIST2H3PS2	1	143874792	143934776	0.712414	0.618398	-0.204179	0.84855	0.99965	NEUTRAL
XLOC_003924	RP11-14N7.2	1	144227029	144250288	12.5842	13.4132	0.0920384	0.9326	0.99965	NEUTRAL
XLOC_003929	NBPF15	1	144421385	144461674	9.32446	7.95198	-0.229706	0.7457	0.99965	NEUTRAL
XLOC_003937	SRGAP2B	1	144627191	145095528	4.08354	2.5269	-0.692454	0.40295	0.99965	NEUTRAL
XLOC_003942	NBPF8	1	145289899	145405778	1.44108	1.12917	-0.35189	0.6661	0.99965	NEUTRAL
XLOC_003946	PDZK1	1	145670851	145708148	0.418554	0.516428	0.303154	0.75385	0.99965	NEUTRAL
XLOC_003947	RNF115	1	145719470	145824077	4.31829	7.11104	0.719598	0.21435	0.99965	NEUTRAL
XLOC_003948	PIAS3	1	145845628	145859836	26.3	27.5341	0.0661528	0.90025	0.99965	NEUTRAL
XLOC_003952	PEX11B	1	145911349	145918837	9.31383	13.5392	0.5397	0.34075	0.99965	NEUTRAL
XLOC_003953	RBM8A	1	145919012	145978848	35.6967	42.4044	0.248421	0.8199	0.99965	NEUTRAL
XLOC_003954	LIX1L	1	145919012	145978848	12.6002	12.9237	0.036574	0.9657	0.99965	NEUTRAL
XLOC_003955	ANKRD34A	1	145919012	145978848	1.83048	1.69038	-0.11487	0.964	0.99965	NEUTRAL
XLOC_003956	TXNIP	1	145992434	145996600	185.014	140.717	-0.394839	0.5002	0.99965	NEUTRAL
XLOC_003959	NBPF10,NOTCH2NL	1	146064698	146229026	13.6819	11.3431	-0.270449	0.64575	0.99965	NEUTRAL
XLOC_003965	PFN1P8	1	146938743	146996202	0.672293	0.65067	-0.0471639	0.8052	0.99965	NEUTRAL
XLOC_003969	PRKAB2	1	147155105	147172550	11.6266	12.8961	0.149506	0.75665	0.99965	NEUTRAL
XLOC_003974	ACP6	1	147629651	147670496	1.7855	2.19691	0.299147	0.78205	0.99965	NEUTRAL
XLOC_003975	GJA5	1	147756198	147773362	0.280254	0.502369	0.842013	0.4192	0.99965	NEUTRAL
XLOC_003979	NBPF11	1	148102045	148152322	1.71484	1.46076	-0.231358	0.73935	0.99965	NEUTRAL
XLOC_003992	NBPF14	1	148531384	148679751	6.73717	5.31722	-0.341472	0.5771	0.99965	NEUTRAL
XLOC_003998	RP4-791M13.4	1	148808180	149048286	0.435491	0.738406	0.761772	0.75555	0.99965	NEUTRAL
XLOC_003999	NBPF9	1	149054026	149103561	4.45802	4.34347	-0.0375556	0.9427	0.99965	NEUTRAL
XLOC_004002	WI2-1896O14.1	1	149176021	149321732	5.23253	8.1833	0.645173	0.414	0.99965	NEUTRAL
XLOC_004008	HIST2H2BF	1	149782670	149812373	1.1578	1.66595	0.524962	0.53365	0.99965	NEUTRAL
XLOC_004013	RP11-196G18.22	1	149842187	149886652	0.513454	0.550623	0.10083	0.9385	0.99965	NEUTRAL
XLOC_004019	SV2A	1	149903317	149917882	7.08781	8.85107	0.320511	0.52525	0.99965	NEUTRAL
XLOC_004020	SF3B4	1	149923316	149928344	18.9439	20.4075	0.107367	0.8375	0.99965	NEUTRAL
XLOC_004021	MTMR11	1	149928650	149936898	7.78628	4.29501	-0.858272	0.191	0.99965	NEUTRAL
XLOC_004022	OTUD7B	1	149937811	150010676	5.20002	4.97914	-0.0626193	0.9157	0.99965	NEUTRAL
XLOC_004023	ANP32E	1	150218416	150236156	14.463	12.0522	-0.263068	0.6025	0.99965	NEUTRAL
XLOC_004025	APH1A	1	150265398	150280916	44.5086	54.7602	0.299042	0.58985	0.99965	NEUTRAL
XLOC_004028	MCL1	1	150548561	150579738	61.2056	57.9844	-0.0779984	0.8985	0.99965	NEUTRAL
XLOC_004032	ENSA	1	150600850	150629612	23.4702	23.2008	-0.0166547	0.9767	0.99965	NEUTRAL
XLOC_004034	GOLPH3L	1	150646224	150697144	9.22736	6.2453	-0.563146	0.3555	0.99965	NEUTRAL
XLOC_004036	CTSS	1	150730195	150765957	1.54195	0.906496	-0.766387	0.52015	0.99965	NEUTRAL
XLOC_004037	CTSK	1	150796207	150808323	9.49562	9.30882	-0.0286642	0.96015	0.99965	NEUTRAL
XLOC_004038	ARNT	1	150809704	150876768	14.5507	15.0157	0.0453768	0.93035	0.99965	NEUTRAL
XLOC_004041	CERS2	1	150926262	150975534	93.7575	118.824	0.341824	0.5937	0.99965	NEUTRAL
XLOC_004042	FAM63A	1	150996085	151008375	3.50535	3.45317	-0.0216383	0.97265	0.99965	NEUTRAL
XLOC_004044	CDC42SE1	1	151047739	151070325	23.6099	23.3297	-0.0172243	0.9777	0.99965	NEUTRAL
XLOC_004047	SEMA6C	1	151131684	151146664	0.753945	0.668291	-0.173983	0.8338	0.99965	NEUTRAL
XLOC_004048	LYSMD1	1	151156628	151195321	3.49661	3.2244	-0.116924	0.924	0.99965	NEUTRAL
XLOC_004049	TMOD4,VPS72	1	151156628	151195321	13.7193	12.1592	-0.174149	0.8251	0.99965	NEUTRAL
XLOC_004051	PI4KB	1	151280023	151327715	19.1286	19.9451	0.0603019	0.91495	0.99965	NEUTRAL
XLOC_004053	RFX5	1	151340639	151348027	3.8459	5.10616	0.408916	0.4428	0.99965	NEUTRAL
XLOC_004055	POGZ	1	151402723	151459465	8.15293	9.32674	0.194054	0.7248	0.99965	NEUTRAL
XLOC_004060	MRPL9	1	151755540	151794402	20.5945	18.7597	-0.134627	0.82925	0.99965	NEUTRAL
XLOC_004067	THEM4	1	151873583	151909808	5.45009	7.33374	0.428269	0.4867	0.99965	NEUTRAL
XLOC_004069	S100A10	1	151982914	151994390	167.726	122.186	-0.457024	0.39935	0.99965	NEUTRAL
XLOC_004070	S100A11	1	151994530	152047907	564.164	710.177	0.332063	0.5488	0.99965	NEUTRAL
XLOC_004104	S100A6	1	153533602	153536244	1559.5	1426.06	-0.129051	0.854	0.99965	NEUTRAL
XLOC_004108	S100A2	1	153561107	153567890	5.22824	3.70598	-0.496471	0.64115	0.99965	NEUTRAL
XLOC_004109	S100A16	1	153606885	153613145	117.784	127.367	0.112852	0.82565	0.99965	NEUTRAL
XLOC_004111	S100A13	1	153618786	153646306	114.413	87.6554	-0.384337	0.59735	0.99965	NEUTRAL
XLOC_004112	ILF2	1	153658653	153671048	47.3516	47.6026	0.00762949	0.9874	0.99965	NEUTRAL
XLOC_004117	AL513523.2	1	153728066	153780157	7.2482	6.54653	-0.146893	0.92055	0.99965	NEUTRAL
XLOC_004119	GATAD2B	1	153804724	153922975	4.34506	3.28783	-0.402241	0.4383	0.99965	NEUTRAL
XLOC_004121	DENND4B	1	153929500	153946696	15.2545	13.51	-0.175201	0.7845	0.99965	NEUTRAL
XLOC_004122	CRTC2	1	153947668	153958625	10.9759	9.46434	-0.213762	0.6837	0.99965	NEUTRAL
XLOC_004123	SLC39A1	1	153959098	153977688	37.687	47.7442	0.341257	0.6185	0.99965	NEUTRAL
XLOC_004125	JTB	1	153959098	153977688	54.9034	57.7384	0.0726365	0.9194	0.99965	NEUTRAL
XLOC_004126	RAB13	1	153981616	153986358	67.7941	102.708	0.599314	0.2419	0.99965	NEUTRAL
XLOC_004130	TPM3	1	154155303	154194648	137.177	118.247	-0.214235	0.71825	0.99965	NEUTRAL
XLOC_004134	C1orf43	1	154206705	154271510	76.0491	84.621	0.154084	0.83355	0.99965	NEUTRAL
XLOC_004140	UBE2Q1	1	154548576	154559028	34.8793	38.6451	0.147912	0.8071	0.99965	NEUTRAL
XLOC_004142	ADAR	1	154582061	154627999	40.1789	35.58	-0.175372	0.73595	0.99965	NEUTRAL
XLOC_004145	PMVK	1	154924733	154936991	9.51882	10.4255	0.131261	0.8311	0.99965	NEUTRAL
XLOC_004146	PBXIP1	1	154944075	154956123	23.2558	15.2305	-0.610626	0.21385	0.99965	NEUTRAL
XLOC_004151	DPM3	1	155139890	155140595	29.7795	29.6869	-0.00449356	0.99485	0.99965	NEUTRAL
XLOC_004152	KRTCAP2,MUC1,RP11-201K10.3	1	155169407	155192916	91.9027	122.309	0.412355	0.4354	0.99965	NEUTRAL
XLOC_004154	GBAP1,RP11-263K19.6	1	155195587	155227422	3.34822	4.19289	0.324548	0.82145	0.99965	NEUTRAL
XLOC_004155	GBA	1	155234451	155244699	30.8943	36.6899	0.248042	0.64305	0.99965	NEUTRAL
XLOC_004157	FAM189B	1	155247204	155255483	16.7943	18.3544	0.128157	0.80955	0.99965	NEUTRAL
XLOC_004158	SCAMP3	1	155255978	155262430	42.3536	46.2307	0.126367	0.79895	0.99965	NEUTRAL
XLOC_004159	CLK2	1	155262867	155301434	7.05475	6.6108	-0.0937698	0.88295	0.99965	NEUTRAL
XLOC_004161	RUSC1-AS1	1	155308747	155331114	2.21654	2.66192	0.264153	0.89955	0.99965	NEUTRAL
XLOC_004162	ASH1L	1	155335267	155563944	7.40396	5.02576	-0.558955	0.2492	0.99965	NEUTRAL
XLOC_004168	YY1AP1	1	155609775	155739010	16.1783	13.2772	-0.285106	0.69065	0.99965	NEUTRAL
XLOC_004170	GON4L	1	155745828	155859400	6.99802	4.87075	-0.522803	0.32095	0.99965	NEUTRAL
XLOC_004171	RIT1	1	155897807	155911404	19.7301	15.1754	-0.378657	0.55625	0.99965	NEUTRAL
XLOC_004172	KIAA0907	1	155913042	155934400	11.4101	10.891	-0.0671702	0.9013	0.99965	NEUTRAL
XLOC_004175	ARHGEF2	1	155946850	156007070	40.1931	36.3466	-0.145126	0.77665	0.99965	NEUTRAL
XLOC_004177	SSR2	1	156009047	156020959	145.344	130.185	-0.158909	0.7491	0.99965	NEUTRAL
XLOC_004178	UBQLN4	1	156035300	156053794	9.92083	6.48076	-0.614299	0.23325	0.99965	NEUTRAL
XLOC_004179	MEX3A	1	156072012	156081998	1.01403	1.34281	0.40516	0.5633	0.99965	NEUTRAL
XLOC_004181	PAQR6	1	156212981	156248117	0.589147	0.724577	0.298511	0.8184	0.99965	NEUTRAL
XLOC_004182	SMG5	1	156249223	156282825	17.7684	19.1134	0.105267	0.8327	0.99965	NEUTRAL
XLOC_004183	GLMP	1	156282934	156295689	19.699	22.4981	0.191685	0.7545	0.99965	NEUTRAL
XLOC_004185	CCT3	1	156308967	156367873	67.6375	66.0126	-0.035083	0.9421	0.99965	NEUTRAL
XLOC_004188	MEF2D	1	156463726	156500828	20.0504	15.4286	-0.378028	0.4754	0.99965	NEUTRAL
XLOC_004192	GPATCH4	1	156594486	156601496	7.2296	7.84164	0.11724	0.83365	0.99965	NEUTRAL
XLOC_004201	ISG20L2	1	156721890	156736960	10.4797	8.68453	-0.271078	0.6558	0.99965	NEUTRAL
XLOC_004202	MRPL24	1	156737302	156741590	23.6533	31.5897	0.417416	0.43195	0.99965	NEUTRAL
XLOC_004203	HDGF	1	156742106	156800817	83.3071	94.218	0.177564	0.75875	0.99965	NEUTRAL
XLOC_004206	ARHGEF11	1	156934839	157045370	7.12474	8.18919	0.200884	0.69415	0.99965	NEUTRAL
XLOC_004211	ETV3	1	157121190	157138474	5.59458	4.30766	-0.377125	0.4557	0.99965	NEUTRAL
XLOC_004256	C1orf204,CFAP45,RP11-190A12.7,VSIG8	1	159826749	159900163	1.41842	1.4547	0.0364434	0.9646	0.99965	NEUTRAL
XLOC_004260	TAGLN2	1	159918106	159925732	260.154	315.673	0.279066	0.6483	0.99965	NEUTRAL
XLOC_004262	SLAMF9	1	159951491	159954254	0.8124	0.490786	-0.727097	0.53355	0.99965	NEUTRAL
XLOC_004264	RP11-226L15.5	1	160024952	160026794	1.13433	1.1009	-0.0431671	0.96255	0.99965	NEUTRAL
XLOC_004265	PIGM	1	160027672	160031991	1.3937	1.56193	0.164408	0.8245	0.99965	NEUTRAL
XLOC_004267	IGSF8	1	160091339	160098943	15.0855	11.9167	-0.340171	0.5183	0.99965	NEUTRAL
XLOC_004269	DCAF8,PEX19,RP11-574F21.3	1	160215714	160286348	55.4733	52.857	-0.0697004	0.8847	0.99965	NEUTRAL
XLOC_004271	COPA	1	160289272	160358952	54.9079	53.8702	-0.0275271	0.97245	0.99965	NEUTRAL
XLOC_004285	USF1	1	161039250	161045977	13.1833	12.1477	-0.118028	0.8459	0.99965	NEUTRAL
XLOC_004288	PFDN2	1	161100555	161132688	37.9753	36.3866	-0.0616536	0.9465	0.99965	NEUTRAL
XLOC_004289	DEDD	1	161100555	161132688	13.0984	14.7012	0.166544	0.8369	0.99965	NEUTRAL
XLOC_004291	RP11-297K8.2	1	161152775	161159349	5.35175	7.49052	0.485056	0.58375	0.99965	NEUTRAL
XLOC_004292	B4GALT3	1	161166409	161178013	13.8483	13.8036	-0.004657	0.9934	0.99965	NEUTRAL
XLOC_004295	NR1I3	1	161225938	161238302	2.28829	2.81216	0.297405	0.77875	0.99965	NEUTRAL
XLOC_004296	MPZ	1	161304734	161309972	0.466733	0.495964	0.0876359	0.9344	0.99965	NEUTRAL
XLOC_004297	CFAP126	1	161314256	161375340	0.625376	0.340425	-0.877387	0.7401	0.99965	NEUTRAL
XLOC_004308	OLFML2B	1	161983191	162023854	4.4612	8.72606	0.967898	0.1058	0.99965	NEUTRAL
XLOC_004328	ALDH9A1	1	165662215	165709968	19.5965	24.9247	0.346978	0.5705	0.99965	NEUTRAL
XLOC_004330	TMCO1	1	165724292	165911618	58.502	51.6057	-0.180957	0.80545	0.99965	NEUTRAL
XLOC_004339	TADA1	1	166856509	166876327	2.5241	1.95911	-0.365574	0.62265	0.99965	NEUTRAL
XLOC_004348	CREG1	1	167529676	167553767	21.9481	33.4146	0.606383	0.2164	0.99965	NEUTRAL
XLOC_004352	MPC2	1	167916728	168075843	28.4566	29.8129	0.0671723	0.95285	0.99965	NEUTRAL
XLOC_004354	GPR161	1	168079542	168137667	4.86747	5.27543	0.116116	0.8659	0.99965	NEUTRAL
XLOC_004355	ANKRD36BP1	1	168225937	168253025	2.77634	3.69065	0.410688	0.8348	0.99965	NEUTRAL
XLOC_004366	NME7	1	169105696	169367967	4.82718	6.75448	0.484665	0.5399	0.99965	NEUTRAL
XLOC_004368	SLC19A2	1	169463908	169486003	4.30484	6.24565	0.53689	0.334	0.99965	NEUTRAL
XLOC_004374	METTL18	1	169662006	169894267	1.97911	1.25422	-0.658061	0.6356	0.99965	NEUTRAL
XLOC_004375	SCYL3	1	169662006	169894267	2.76564	1.8588	-0.573245	0.4374	0.99965	NEUTRAL
XLOC_004376	KIFAP3	1	169921325	170085208	12.9701	10.5878	-0.292783	0.55205	0.99965	NEUTRAL
XLOC_004396	VAMP4	1	171700159	171742247	8.8598	5.75698	-0.62196	0.35095	0.99965	NEUTRAL
XLOC_004400	DNM3OS,MIR214	1	171841497	172468831	1.22956	1.23595	0.00747083	0.99385	0.99965	NEUTRAL
XLOC_004402	PIGC	1	171841497	172468831	6.4556	8.17126	0.340008	0.62785	0.99965	NEUTRAL
XLOC_004413	CENPL	1	173799549	173858546	2.19759	2.17674	-0.0137582	0.9893	0.99965	NEUTRAL
XLOC_004414	GAS5	1	173863247	173903549	368.319	434.571	0.238635	0.6628	0.99965	NEUTRAL
XLOC_004416	RC3H1	1	173931213	174022297	2.92646	1.91728	-0.610095	0.2519	0.99965	NEUTRAL
XLOC_004427	MRPS14	1	174999162	175023425	8.58011	7.56734	-0.18121	0.86585	0.99965	NEUTRAL
XLOC_004435	RFWD2	1	175944830	176207493	10.8827	10.2115	-0.0918449	0.86645	0.99965	NEUTRAL
XLOC_004446	SEC16B	1	177923955	178038007	4.22982	5.47752	0.372925	0.5787	0.99965	NEUTRAL
XLOC_004447	RASAL2-AS1	1	178091507	178093984	0.679008	0.618206	-0.135341	0.89815	0.99965	NEUTRAL
XLOC_004456	ABL2	1	179099326	179229684	8.71781	5.48239	-0.66916	0.3039	0.99965	NEUTRAL
XLOC_004464	TOR1AIP2	1	179839966	179877803	15.6398	12.0582	-0.375213	0.50145	0.99965	NEUTRAL
XLOC_004470	ACBD6	1	180230285	180502954	27.8796	35.5134	0.349157	0.56035	0.99965	NEUTRAL
XLOC_004475	STX6	1	180913153	181023121	13.0005	12.517	-0.0546719	0.9174	0.99965	NEUTRAL
XLOC_004487	RNASEL	1	182573633	182589256	1.73762	2.25489	0.37595	0.58255	0.99965	NEUTRAL
XLOC_004498	NMNAT2	1	183248236	183418602	1.23008	1.35904	0.143841	0.8484	0.99965	NEUTRAL
XLOC_004502	ARPC5	1	183620845	183635757	193.788	200.795	0.0512403	0.93715	0.99965	NEUTRAL
XLOC_004507	COLGALT2	1	183929853	184037729	2.14913	2.07747	-0.0489228	0.93515	0.99965	NEUTRAL
XLOC_004510	EDEM3	1	184690230	184754913	9.65631	7.45879	-0.372531	0.4339	0.99965	NEUTRAL
XLOC_004511	FAM129A	1	184790723	184974550	4.46842	4.08015	-0.131142	0.7879	0.99965	NEUTRAL
XLOC_004515	TRMT1L	1	185118097	185157072	4.23346	4.0136	-0.0769392	0.9128	0.99965	NEUTRAL
XLOC_004521	IVNS1ABP	1	185296387	185317329	47.45	45.5864	-0.0578028	0.9186	0.99965	NEUTRAL
XLOC_004527	TPR	1	186296278	186375693	9.41406	6.46599	-0.541947	0.296	0.99965	NEUTRAL
XLOC_004555	UCHL5	1	193012249	193091777	9.91519	9.90343	-0.00171348	0.99865	0.99965	NEUTRAL
XLOC_004557	RP11-101E13.5	1	193012249	193091777	9.01212	6.05142	-0.574593	0.38605	0.99965	NEUTRAL
XLOC_004558	GLRX2	1	193096467	193106114	10.8398	13.0391	0.266513	0.7057	0.99965	NEUTRAL
XLOC_004571	ZBTB41	1	197153679	197200542	5.10672	3.15679	-0.693939	0.17605	0.99965	NEUTRAL
XLOC_004573	DENND1B	1	197504747	197775696	2.80419	1.54622	-0.858841	0.13955	0.99965	NEUTRAL
XLOC_004593	DDX59	1	200623895	200694250	4.07803	3.09154	-0.399546	0.5947	0.99965	NEUTRAL
XLOC_004598	TMEM9	1	201134771	201171574	36.6357	45.2251	0.303873	0.54165	0.99965	NEUTRAL
XLOC_004602	PHLDA3	1	201464382	201469237	69.2593	104.55	0.59411	0.31195	0.99965	NEUTRAL
XLOC_004603	CSRP1	1	201483529	201533608	278.955	299.481	0.102436	0.86985	0.99965	NEUTRAL
XLOC_004605	IPO9-AS1	1	201622884	201884294	3.78699	4.38999	0.213166	0.92745	0.99965	NEUTRAL
XLOC_004607	LMOD1	1	201893841	201946588	16.8678	28.1838	0.740596	0.13775	0.99965	NEUTRAL
XLOC_004609	RP11-465N4.5	1	201982371	202017188	1.11848	0.922854	-0.277359	0.8639	0.99965	NEUTRAL
XLOC_004611	ARL8A	1	202122857	202144743	18.0573	17.7542	-0.0244165	0.95835	0.99965	NEUTRAL
XLOC_004613	UBE2T	1	202331656	202341980	3.70333	3.95781	0.0958792	0.9078	0.99965	NEUTRAL
XLOC_004619	KDM5B	1	202724490	202809470	20.5926	15.7761	-0.384388	0.43415	0.99965	NEUTRAL
XLOC_004623	RABIF	1	202878956	202889135	3.65751	3.13631	-0.221793	0.7417	0.99965	NEUTRAL
XLOC_004624	KLHL12	1	202891099	202928636	9.12253	10.3178	0.177634	0.72905	0.99965	NEUTRAL
XLOC_004626	ADIPOR1	1	202940822	202958572	58.5276	52.8151	-0.148166	0.7648	0.99965	NEUTRAL
XLOC_004627	CYB5R1	1	202961868	202967280	24.9168	33.3376	0.420032	0.39095	0.99965	NEUTRAL
XLOC_004646	ETNK2	1	204131061	204152003	1.86687	2.66465	0.513328	0.6039	0.99965	NEUTRAL
XLOC_004653	PPP1R15B	1	204377849	204494724	7.73849	6.59519	-0.230636	0.63705	0.99965	NEUTRAL
XLOC_004659	TMEM81	1	205083128	205084460	2.21018	2.00744	-0.138803	0.8626	0.99965	NEUTRAL
XLOC_004660	RBBP5	1	205086141	205122015	5.21887	4.72251	-0.144186	0.7832	0.99965	NEUTRAL
XLOC_004661	DSTYK	1	205142504	205211566	4.33758	3.557	-0.286231	0.57365	0.99965	NEUTRAL
XLOC_004663	NUAK2	1	205302058	205321755	3.36526	2.92351	-0.203016	0.74165	0.99965	NEUTRAL
XLOC_004667	ELK4	1	205568884	205631962	5.31701	3.89831	-0.447768	0.3409	0.99965	NEUTRAL
XLOC_004668	SLC45A3	1	205657850	205680459	0.672921	0.424143	-0.665887	0.50205	0.99965	NEUTRAL
XLOC_004669	NUCKS1	1	205712818	205750276	32.1571	31.2476	-0.0413924	0.9406	0.99965	NEUTRAL
XLOC_004671	RAB29	1	205767985	205775460	6.24229	8.91827	0.51469	0.33895	0.99965	NEUTRAL
XLOC_004672	SLC41A1	1	205789092	205813748	20.2198	21.5644	0.0928801	0.8595	0.99965	NEUTRAL
XLOC_004675	RAB7B	1	205976739	206003461	3.2813	3.20632	-0.0333498	0.96305	0.99965	NEUTRAL
XLOC_004684	EIF2D	1	206507529	206612463	14.5049	20.3522	0.48865	0.3217	0.99965	NEUTRAL
XLOC_004693	YOD1	1	207006844	207099993	2.56997	1.70748	-0.589882	0.38735	0.99965	NEUTRAL
XLOC_004709	LAMB3	1	209614869	209652466	3.30972	3.51992	0.0888324	0.9154	0.99965	NEUTRAL
XLOC_004711	C1orf74	1	209756031	209784559	0.673284	0.736699	0.12986	0.8811	0.99965	NEUTRAL
XLOC_004723	SLC30A1	1	211571567	211578742	21.0766	16.6596	-0.33929	0.4942	0.99965	NEUTRAL
XLOC_004730	LPGAT1	1	211743456	211853703	10.3774	9.28767	-0.160054	0.75195	0.99965	NEUTRAL
XLOC_004732	INTS7	1	211940398	212035542	5.95219	5.98003	0.00672996	0.9901	0.99965	NEUTRAL
XLOC_004738	TMEM206	1	212363930	212414901	6.32685	4.15679	-0.606017	0.42705	0.99965	NEUTRAL
XLOC_004744	NSL1	1	212726152	212791782	7.44423	5.42793	-0.45572	0.4935	0.99965	NEUTRAL
XLOC_004748	ANGEL2	1	212992181	213015826	7.07088	5.64253	-0.325549	0.64535	0.99965	NEUTRAL
XLOC_004754	PTPN14	1	214344171	214552449	30.5306	20.3809	-0.583034	0.3206	0.99965	NEUTRAL
XLOC_004762	GPATCH2	1	217426991	217631082	3.06543	2.68254	-0.192486	0.77335	0.99965	NEUTRAL
XLOC_004777	EPRS	1	219968600	220046658	47.4951	47.3739	-0.00368526	0.9946	0.99965	NEUTRAL
XLOC_004778	BPNT1	1	220057481	220090462	9.41724	8.47793	-0.151593	0.79755	0.99965	NEUTRAL
XLOC_004782	RAB3GAP2	1	220148292	220272454	9.19013	9.70091	0.0780353	0.8613	0.99965	NEUTRAL
XLOC_004799	RP11-400N13.3	1	222041704	222064763	1.6001	2.17145	0.440491	0.7077	0.99965	NEUTRAL
XLOC_004803	RP11-378J18.9	1	222477251	222504622	1.88235	2.98953	0.667388	0.5799	0.99965	NEUTRAL
XLOC_004807	TAF1A	1	222557901	222593032	2.66625	2.17099	-0.296458	0.77285	0.99965	NEUTRAL
XLOC_004809	RP11-378J18.8	1	222618085	222668012	0.817705	0.830553	0.0224912	0.7545	0.99965	NEUTRAL
XLOC_004810	AIDA	1	222668012	222735196	39.4954	36.5093	-0.113421	0.85035	0.99965	NEUTRAL
XLOC_004815	TP53BP2	1	223779898	223845972	9.68078	8.51258	-0.185527	0.71205	0.99965	NEUTRAL
XLOC_004818	RP11-504P24.8	1	223951387	223953439	1.23204	1.15715	-0.0904731	0.92685	0.99965	NEUTRAL
XLOC_004825	NVL	1	224219612	224330387	6.04355	6.08786	0.0105385	0.9858	0.99965	NEUTRAL
XLOC_004827	WDR26	1	224385142	224740549	33.7583	27.4403	-0.298948	0.65635	0.99965	NEUTRAL
XLOC_004832	LBR	1	225401501	225428925	6.30362	8.42468	0.418441	0.44575	0.99965	NEUTRAL
XLOC_004834	ENAH	1	225486834	225653142	111.099	144.71	0.381316	0.56155	0.99965	NEUTRAL
XLOC_004836	TMEM63A	1	225810091	225882369	7.44778	8.68793	0.222202	0.7908	0.99965	NEUTRAL
XLOC_004837	LEFTY1,PYCR2,RP4-559A3.7	1	225886281	225924340	23.2141	26.8915	0.21215	0.66475	0.99965	NEUTRAL
XLOC_004839	SDE2	1	225982701	225999331	6.56631	5.26236	-0.319374	0.5452	0.99965	NEUTRAL
XLOC_004841	ACBD3	1	226144678	226186730	20.8947	17.297	-0.272615	0.58205	0.99965	NEUTRAL
XLOC_004846	PARP1	1	226360690	226408079	13.1048	15.1445	0.208703	0.6682	0.99965	NEUTRAL
XLOC_004849	ITPKB	1	226631689	226739323	1.35259	1.37077	0.019263	0.97775	0.99965	NEUTRAL
XLOC_004852	CDC42BPA	1	226989864	227318474	9.60751	9.58182	-0.00386401	0.99475	0.99965	NEUTRAL
XLOC_004865	C1orf35	1	228100725	228105411	3.48825	4.37253	0.325964	0.67905	0.99965	NEUTRAL
XLOC_004866	MRPL55	1	228106678	228109312	22.3819	34.005	0.603415	0.31705	0.99965	NEUTRAL
XLOC_004875	TRIM11	1	228393672	228406840	5.31702	5.99698	0.173617	0.76615	0.99965	NEUTRAL
XLOC_004879	HIST3H2A	1	228456978	228457873	1.97031	1.65216	-0.254067	0.79525	0.99965	NEUTRAL
XLOC_004905	CCSAP	1	229319402	229343294	2.96079	2.18915	-0.435611	0.4753	0.99965	NEUTRAL
XLOC_004908	NUP133	1	229440259	229508341	10.0799	6.82799	-0.561947	0.3134	0.99965	NEUTRAL
XLOC_004909	ABCB10	1	229516581	229558695	3.41224	3.19044	-0.096965	0.8772	0.99965	NEUTRAL
XLOC_004911	TAF5L	1	229593110	229626047	4.14721	4.37248	0.0763095	0.8999	0.99965	NEUTRAL
XLOC_004917	RP5-956O18.3	1	230057989	230282124	38.8195	31.6534	-0.29442	0.851	0.99965	NEUTRAL
XLOC_004921	AGT	1	230702522	230802003	1.03763	2.01601	0.958216	0.2548	0.99965	NEUTRAL
XLOC_004923	C1orf198	1	230837118	230869589	46.175	83.3862	0.852695	0.1212	0.99965	NEUTRAL
XLOC_004924	TTC13	1	230906242	230978875	10.3219	10.9708	0.0879538	0.86565	0.99965	NEUTRAL
XLOC_004929	C1orf131	1	231223762	231241187	4.22494	3.16256	-0.417837	0.5827	0.99965	NEUTRAL
XLOC_004931	EXOC8	1	231332752	231355023	3.51074	2.85271	-0.299438	0.6415	0.99965	NEUTRAL
XLOC_004932	EGLN1	1	231363750	231425044	17.0395	11.2418	-0.600011	0.24695	0.99965	NEUTRAL
XLOC_004934	RP11-295G20.2	1	231522387	231528556	2.97339	3.40168	0.194139	0.8443	0.99965	NEUTRAL
XLOC_004941	PCNXL2	1	232950604	233295727	3.29631	2.71901	-0.277771	0.69725	0.99965	NEUTRAL
XLOC_004950	TARBP1	1	234391312	234479103	3.9709	4.65601	0.229628	0.7034	0.99965	NEUTRAL
XLOC_004952	IRF2BP2	1	234604268	234609525	26.9367	34.8529	0.371703	0.5499	0.99965	NEUTRAL
XLOC_004955	RP11-443B7.1	1	234957230	234970062	0.705724	0.831406	0.236448	0.8658	0.99965	NEUTRAL
XLOC_004960	TOMM20	1	235109335	235128936	63.4466	49.0986	-0.369861	0.4805	0.99965	NEUTRAL
XLOC_004961	SNORA14B	1	235109335	235128936	8.07417	12.3362	0.611509	0.6912	0.99965	NEUTRAL
XLOC_004962	ARID4B,RBM34	1	235131182	235344532	38.2502	24.5757	-0.638237	0.4369	0.99965	NEUTRAL
XLOC_004965	B3GALNT2	1	235449922	235504481	5.34612	5.20661	-0.0381468	0.9547	0.99965	NEUTRAL
XLOC_004971	LYST	1	235661040	235883640	3.35988	2.08517	-0.688245	0.3016	0.99965	NEUTRAL
XLOC_004975	NID1	1	235975829	236065162	19.0334	31.0436	0.70576	0.176	0.99965	NEUTRAL
XLOC_004980	HEATR1	1	236517999	236604504	7.96815	7.87211	-0.0174945	0.9763	0.99965	NEUTRAL
XLOC_004990	LINC01139	1	238480383	238538305	1.41749	1.6184	0.191233	0.83155	0.99965	NEUTRAL
XLOC_005011	FH	1	241497602	241519761	29.4516	34.291	0.219485	0.654	0.99965	NEUTRAL
XLOC_005012	OPN3	1	241532133	241802133	7.57806	12.7612	0.751868	0.3143	0.99965	NEUTRAL
XLOC_005013	CHML	1	241532133	241802133	1.87039	1.65956	-0.172542	0.8313	0.99965	NEUTRAL
XLOC_005023	LINC01347,RP11-261C10.7	1	243054860	243101744	0.698173	0.716899	0.0381864	0.9634	0.99965	NEUTRAL
XLOC_005027	AKT3	1	243256033	243851079	24.5658	12.6795	-0.954149	0.11645	0.99965	NEUTRAL
XLOC_005031	ADSS	1	244352634	244452134	20.415	17.3651	-0.233442	0.63435	0.99965	NEUTRAL
XLOC_005036	HNRNPU,RP11-11N7.5	1	244835321	244864542	62.056	64.2315	0.0497105	0.92915	0.99965	NEUTRAL
XLOC_005044	SMYD3	1	245749341	246507312	21.0983	18.4669	-0.192183	0.73855	0.99965	NEUTRAL
XLOC_005050	TFB2M	1	246540559	246566324	6.32961	5.3354	-0.24652	0.68725	0.99965	NEUTRAL
XLOC_005055	AHCTF1	1	246839097	246931978	12.2636	8.22485	-0.576322	0.42515	0.99965	NEUTRAL
XLOC_005056	ZNF670,ZNF695	1	246945546	247078811	1.40952	0.996755	-0.499897	0.55365	0.99965	NEUTRAL
XLOC_005058	ZNF669	1	247099961	247104372	1.38366	1.5932	0.203433	0.80605	0.99965	NEUTRAL
XLOC_005060	ZNF124	1	247121974	247172016	0.568201	0.596089	0.0691257	0.94925	0.99965	NEUTRAL
XLOC_005063	MIR3916,RP11-488L18.4,RP11-488L18.8	1	247189850	247241823	6.71499	5.26918	-0.349808	0.70215	0.99965	NEUTRAL
XLOC_005066	ZNF496	1	247297411	247331846	7.39963	7.57244	0.0333056	0.95735	0.99965	NEUTRAL
XLOC_005094	SH3BP5L	1	248810445	248826633	15.2966	10.7225	-0.512575	0.3121	0.99965	NEUTRAL
XLOC_005095	ZNF692	1	248850005	248859144	11.9292	9.98771	-0.256268	0.6672	0.99965	NEUTRAL
XLOC_005098	ZMYND11	10	134464	254637	23.4178	20.3383	-0.20341	0.69495	0.99965	NEUTRAL
XLOC_005105	GTPBP4	10	971145	1049170	29.6021	24.0534	-0.29946	0.73835	0.99965	NEUTRAL
XLOC_005107	WDR37	10	1049537	1132297	5.55837	4.02442	-0.465882	0.38395	0.99965	NEUTRAL
XLOC_005118	PFKP	10	3066332	3172841	91.7756	56.6948	-0.694893	0.26675	0.99965	NEUTRAL
XLOC_005133	AKR1C1,AKR1C3	10	4922563	5135226	40.5501	68.8634	0.764034	0.2382	0.99965	NEUTRAL
XLOC_005145	FAM208B	10	5684837	5763740	8.73402	7.51179	-0.21749	0.63675	0.99965	NEUTRAL
XLOC_005148	FBXO18	10	5890202	5978187	19.1239	18.4112	-0.0547882	0.9247	0.99965	NEUTRAL
XLOC_005150	RBM17	10	6088986	6117457	24.7554	19.6105	-0.336117	0.5976	0.99965	NEUTRAL
XLOC_005166	ATP5C1	10	7788128	7807815	71.0619	65.1431	-0.125463	0.7997	0.99965	NEUTRAL
XLOC_005167	TAF3	10	7818503	8016627	1.96609	1.549	-0.343995	0.6067	0.99965	NEUTRAL
XLOC_005188	ECHDC3	10	11742365	11764070	3.33316	5.75565	0.788087	0.298	0.99965	NEUTRAL
XLOC_005191	DHTKD1	10	12068971	12123225	1.66173	1.43828	-0.208337	0.7987	0.99965	NEUTRAL
XLOC_005192	SEC61A2	10	12129636	12250589	3.0262	3.23391	0.0957711	0.93945	0.99965	NEUTRAL
XLOC_005193	CDC123	10	12129636	12250589	30.9798	27.7002	-0.16143	0.81975	0.99965	NEUTRAL
XLOC_005198	OPTN	10	12896624	13138308	40.5804	25.1232	-0.691762	0.1798	0.99965	NEUTRAL
XLOC_005203	PRPF18,RP11-295P9.3	10	13586926	14462142	11.7613	9.54711	-0.30091	0.62555	0.99965	NEUTRAL
XLOC_005216	HSPA14	10	14819249	14871741	10.3694	10.4959	0.0175033	0.97515	0.99965	NEUTRAL
XLOC_005217	SUV39H2	10	14878819	14954432	1.44871	1.624	0.164789	0.88655	0.99965	NEUTRAL
XLOC_005218	MEIG1	10	14959438	14988050	0.425452	0.355489	-0.259192	0.8522	0.99965	NEUTRAL
XLOC_005220	RPP38	10	15095384	15168693	3.25176	2.99177	-0.120222	0.93145	0.99965	NEUTRAL
XLOC_005227	VIM	10	17214238	17237593	1566.75	1299.13	-0.270235	0.80295	0.99965	NEUTRAL
XLOC_005232	STAM	10	17644124	17715914	13.9658	10.9873	-0.346069	0.4732	0.99965	NEUTRAL
XLOC_005239	ARL5B	10	18659404	18681639	4.87393	3.67744	-0.406384	0.42315	0.99965	NEUTRAL
XLOC_005262	MLLT10	10	21534164	21743630	4.99348	5.87302	0.234057	0.7353	0.99965	NEUTRAL
XLOC_005272	BMI1,COMMD3,COMMD3-BMI1	10	22315973	22331484	64.1285	60.6957	-0.0793722	0.89575	0.99965	NEUTRAL
XLOC_005279	MSRB2	10	23095505	23122013	11.687	15.4388	0.401652	0.5641	0.99965	NEUTRAL
XLOC_005286	OTUD1	10	23439457	23442390	2.71781	2.03677	-0.416163	0.54875	0.99965	NEUTRAL
XLOC_005287	KIAA1217	10	23694745	24547848	7.45783	9.17275	0.298597	0.5761	0.99965	NEUTRAL
XLOC_005295	THNSL1	10	24981978	25062279	1.08461	1.00206	-0.114208	0.89265	0.99965	NEUTRAL
XLOC_005302	APBB1IP	10	26438202	26567803	7.09883	9.92639	0.483687	0.3538	0.99965	NEUTRAL
XLOC_005307	PDSS1	10	26697658	26861087	1.10705	1.00328	-0.142003	0.9442	0.99965	NEUTRAL
XLOC_005311	MASTL	10	27110111	27186924	2.68796	2.23316	-0.267422	0.88795	0.99965	NEUTRAL
XLOC_005317	RAB18	10	27504173	27542237	53.5976	46.3019	-0.211095	0.7636	0.99965	NEUTRAL
XLOC_005324	WAC	10	28522651	28623112	35.3281	31.7204	-0.155404	0.76035	0.99965	NEUTRAL
XLOC_005328	BAMBI	10	28677341	28682939	22.2706	23.9959	0.107648	0.8233	0.99965	NEUTRAL
XLOC_005333	SVIL-AS1	10	29409401	29736781	21.9841	22.2829	0.0194801	0.9823	0.99965	NEUTRAL
XLOC_005340	MAP3K8	10	30433936	30461833	1.17933	1.50671	0.353438	0.71755	0.99965	NEUTRAL
XLOC_005347	ZEB1	10	31187882	31529814	25.2415	29.3476	0.217446	0.6938	0.99965	NEUTRAL
XLOC_005357	RP11-135A24.4	10	32266288	32378798	0.583712	0.920015	0.656402	0.76395	0.99965	NEUTRAL
XLOC_005359	CCDC7	10	32446139	32882874	0.260428	0.437343	0.747878	0.4074	0.99965	NEUTRAL
XLOC_005372	CREM	10	35098005	35212958	16.764	12.2728	-0.449904	0.49145	0.99965	NEUTRAL
XLOC_005376	CCNY	10	35247024	35572669	23.8641	26.9889	0.177523	0.76575	0.99965	NEUTRAL
XLOC_005398	ZNF33A	10	38010649	38065088	3.2787	2.55106	-0.362028	0.51285	0.99965	NEUTRAL
XLOC_005399	ZNF37A	10	38094335	38125544	3.92634	3.26059	-0.268053	0.5912	0.99965	NEUTRAL
XLOC_005406	HSD17B7P2	10	38356379	38378505	0.513122	0.530114	0.0469983	0.96655	0.99965	NEUTRAL
XLOC_005408	RP11-291L22.7	10	38448688	38448949	0.869122	1.55852	0.842542	0.66745	0.99965	NEUTRAL
XLOC_005420	LINC00839	10	42475542	42495336	3.29989	2.97824	-0.14796	0.83425	0.99965	NEUTRAL
XLOC_005431	BMS1	10	42782800	42834937	3.7755	2.99095	-0.33606	0.52295	0.99965	NEUTRAL
XLOC_005435	CSGALNACT2	10	43138485	43185308	16.264	20.4832	0.33276	0.50005	0.99965	NEUTRAL
XLOC_005439	RP11-517P14.2	10	43420737	43422100	2.06246	1.81091	-0.187655	0.8406	0.99965	NEUTRAL
XLOC_005440	ZNF487	10	43436840	43483179	1.29608	0.881488	-0.556136	0.5941	0.99965	NEUTRAL
XLOC_005443	ZNF485	10	43606406	43617903	0.73468	1.06729	0.538764	0.60685	0.99965	NEUTRAL
XLOC_005446	ZNF32-AS1	10	43628816	43674703	2.99444	2.40914	-0.313767	0.4227	0.99965	NEUTRAL
XLOC_005447	ZNF32-AS2	10	43628816	43674703	0.914657	0.843195	-0.117364	0.5486	0.99965	NEUTRAL
XLOC_005460	RASSF4	10	44811023	44995891	2.19121	2.69979	0.301122	0.79015	0.99965	NEUTRAL
XLOC_005461	ZNF22	10	44997697	45181427	4.00338	3.50668	-0.191114	0.792	0.99965	NEUTRAL
XLOC_005469	FAM21C	10	45706430	45792961	7.71386	8.65065	0.165355	0.7486	0.99965	NEUTRAL
XLOC_005472	TIMM23	10	45972448	46003734	22.2836	26.0155	0.223393	0.6601	0.99965	NEUTRAL
XLOC_005480	SYT15	10	46578216	46652025	0.538708	0.395321	-0.446476	0.75235	0.99965	NEUTRAL
XLOC_005481	RP11-38L15.2	10	46578216	46652025	1.30281	0.984247	-0.404529	0.83785	0.99965	NEUTRAL
XLOC_005485	BMS1P1	10	46753604	46811989	1.31003	0.938736	-0.480811	0.51135	0.99965	NEUTRAL
XLOC_005501	MAPK8	10	48306638	48439360	27.7281	19.3312	-0.520419	0.52025	0.99965	NEUTRAL
XLOC_005515	TIMM23B	10	49818278	49982053	6.80091	7.37599	0.117109	0.88505	0.99965	NEUTRAL
XLOC_005517	AGAP6	10	49982189	50010499	3.90687	2.78668	-0.487468	0.47935	0.99965	NEUTRAL
XLOC_005518	FAM21A	10	50067887	50133506	6.77434	9.85587	0.540904	0.31135	0.99965	NEUTRAL
XLOC_005524	BEND3P1	10	50655966	50660472	0.553327	0.592331	0.0982709	0.92155	0.99965	NEUTRAL
XLOC_005527	ASAH2B	10	50739317	50885675	1.03563	0.652443	-0.666581	0.4078	0.99965	NEUTRAL
XLOC_005551	CISD1	10	58269057	58289586	18.6793	16.5427	-0.175245	0.8065	0.99965	NEUTRAL
XLOC_005553	UBE2D1	10	58334974	58370753	10.6621	10.0621	-0.0835673	0.8945	0.99965	NEUTRAL
XLOC_005554	TFAM	10	58385021	58399221	5.78603	4.80953	-0.266677	0.7441	0.99965	NEUTRAL
XLOC_005555	BICC1	10	58513139	58831437	34.7566	30.7185	-0.178178	0.73355	0.99965	NEUTRAL
XLOC_005570	ARID5B	10	61901299	62096944	16.7681	11.0762	-0.598264	0.2376	0.99965	NEUTRAL
XLOC_005575	ADO	10	62793561	62808483	8.30075	9.57225	0.205615	0.68245	0.99965	NEUTRAL
XLOC_005577	NRBF2	10	63133246	63155031	15.2622	15.0306	-0.0220621	0.9651	0.99965	NEUTRAL
XLOC_005583	REEP3	10	63521362	63625123	17.1879	15.4642	-0.152462	0.7585	0.99965	NEUTRAL
XLOC_005603	SIRT1	10	67884668	67918390	5.55729	4.17726	-0.411825	0.4592	0.99965	NEUTRAL
XLOC_005607	HNRNPH3	10	68282659	68407294	44.9668	42.3423	-0.0867622	0.903	0.99965	NEUTRAL
XLOC_005616	CCAR1	10	68721011	68792377	14.8976	9.70818	-0.617804	0.2638	0.99965	NEUTRAL
XLOC_005620	DDX50	10	68901277	68946847	17.1469	13.672	-0.326724	0.51655	0.99965	NEUTRAL
XLOC_005621	DDX21	10	68956127	68985073	21.9437	21.2254	-0.0480133	0.9262	0.99965	NEUTRAL
XLOC_005622	KIAA1279	10	68988720	69016982	15.2087	13.7468	-0.145804	0.76575	0.99965	NEUTRAL
XLOC_005625	SRGN	10	69088105	69104811	706.932	468.245	-0.594306	0.38305	0.99965	NEUTRAL
XLOC_005627	VPS26A	10	69123511	69172861	20.2617	20.6314	0.0260835	0.95685	0.99965	NEUTRAL
XLOC_005628	SUPV3L1	10	69180231	69209099	9.65153	10.7399	0.154157	0.81465	0.99965	NEUTRAL
XLOC_005629	HKDC1	10	69215332	69268148	0.251664	0.482667	0.939528	0.42255	0.99965	NEUTRAL
XLOC_005630	HK1	10	69269983	69401882	50.5389	61.3764	0.280291	0.5948	0.99965	NEUTRAL
XLOC_005634	C10orf35	10	69630250	69633599	0.328942	0.463465	0.494629	0.65145	0.99965	NEUTRAL
XLOC_005638	H2AFY2	10	70052795	70132934	4.3785	6.93903	0.664297	0.47285	0.99965	NEUTRAL
XLOC_005639	CALM2P2	10	70147288	70170523	1.07907	1.47419	0.45013	0.8489	0.99965	NEUTRAL
XLOC_005641	EIF4EBP2	10	70404378	70428618	11.791	11.9427	0.0184406	0.9694	0.99965	NEUTRAL
XLOC_005645	SGPL1	10	70815960	70881173	9.48142	10.1699	0.101131	0.8317	0.99965	NEUTRAL
XLOC_005649	SLC29A3	10	71319257	71363385	1.33486	1.42599	0.0952683	0.9058	0.99965	NEUTRAL
XLOC_005654	CHST3	10	71964364	72013564	14.7349	17.9866	0.287681	0.57035	0.99965	NEUTRAL
XLOC_005657	ANAPC16	10	72096031	72235860	24.6762	23.7868	-0.0529639	0.9481	0.99965	NEUTRAL
XLOC_005666	MCU	10	72692130	72887694	11.2031	14.2357	0.34562	0.4883	0.99965	NEUTRAL
XLOC_005675	FAM149B1	10	73110374	73358859	8.96467	7.72087	-0.215487	0.91135	0.99965	NEUTRAL
XLOC_005681	RP11-537A6.9	10	73375100	73414076	0.539284	0.341789	-0.657941	0.7535	0.99965	NEUTRAL
XLOC_005689	DUSP8P5,GLUD1P3	10	73730561	73737311	1.06153	1.5951	0.587499	0.59355	0.99965	NEUTRAL
XLOC_005690	SEC24C	10	73744383	73780251	10.5161	9.94877	-0.0800133	0.914	0.99965	NEUTRAL
XLOC_005691	FUT11	10	73744383	73780251	18.4876	14.6615	-0.334531	0.76485	0.99965	NEUTRAL
XLOC_005692	CHCHD1	10	73782046	73783652	12.0652	12.9137	0.0980444	0.8833	0.99965	NEUTRAL
XLOC_005693	ZSWIM8	10	73785581	73811798	24.3791	26.822	0.137772	0.86615	0.99965	NEUTRAL
XLOC_005694	RP11-574K11.5	10	73812500	73874591	0.605571	0.579705	-0.0629766	0.8686	0.99965	NEUTRAL
XLOC_005696	PLAU	10	73909176	73922777	30.6367	16.7753	-0.868927	0.0819	0.99965	NEUTRAL
XLOC_005697	VCL	10	73995192	74151063	63.1236	76.2621	0.272787	0.6739	0.99965	NEUTRAL
XLOC_005699	ADK	10	74151184	74709303	18.9736	18.1854	-0.0612124	0.9044	0.99965	NEUTRAL
XLOC_005703	KAT6B	10	74825581	75032622	4.83985	3.15015	-0.619541	0.2304	0.99965	NEUTRAL
XLOC_005704	SAMD8	10	75094431	75182123	9.79916	7.71142	-0.345661	0.47855	0.99965	NEUTRAL
XLOC_005707	VDAC2	10	75210153	75231448	82.1468	77.1371	-0.0907796	0.85595	0.99965	NEUTRAL
XLOC_005709	ZNF503-AS2	10	75269818	75411842	1.16918	2.00913	0.781068	0.733	0.99965	NEUTRAL
XLOC_005711	C10orf11	10	75430570	76560994	3.75364	5.94566	0.663546	0.40695	0.99965	NEUTRAL
XLOC_005731	RPS24	10	78033759	78056812	1038.17	991.728	-0.0660311	0.90975	0.99965	NEUTRAL
XLOC_005732	LINC00856	10	78238254	78675109	2.45458	2.33967	-0.0691706	0.96515	0.99965	NEUTRAL
XLOC_005733	LINC00595	10	78238254	78675109	0.471121	0.857639	0.864274	0.63975	0.99965	NEUTRAL
XLOC_005737	ZMIZ1	10	79069034	79316528	24.1388	15.1524	-0.671811	0.22985	0.99965	NEUTRAL
XLOC_005738	PPIF	10	79347468	79355337	22.1227	32.9512	0.574801	0.25975	0.99965	NEUTRAL
XLOC_005739	RP11-342M3.5	10	79382324	79445627	3.18344	4.84413	0.605652	0.7619	0.99965	NEUTRAL
XLOC_005743	RP11-506M13.3	10	79660890	79827602	1.74452	1.50568	-0.212416	0.9216	0.99965	NEUTRAL
XLOC_005744	RP11-182L21.5	10	79660890	79827602	0.946063	0.996448	0.0748592	0.11775	0.99965	NEUTRAL
XLOC_005745	BEND3P3	10	79660890	79827602	1.09615	0.683646	-0.681122	0.71575	0.99965	NEUTRAL
XLOC_005747	RP11-182L21.6	10	79660890	79827602	1.18349	1.6926	0.516196	0.78725	0.99965	NEUTRAL
XLOC_005753	TMEM254	10	80046859	80092557	9.70793	8.87581	-0.129286	0.8379	0.99965	NEUTRAL
XLOC_005756	LINC00857	10	80207709	80219657	1.11892	0.730068	-0.616001	0.51825	0.99965	NEUTRAL
XLOC_005763	TSPAN14	10	80454165	80535942	15.0605	17.1814	0.190077	0.7689	0.99965	NEUTRAL
XLOC_005774	GHITM	10	84138419	84153555	74.5467	80.9211	0.11837	0.82015	0.99965	NEUTRAL
XLOC_005779	CCSER2	10	84328585	84518521	11.9103	9.06508	-0.393818	0.4475	0.99965	NEUTRAL
XLOC_005794	BMPR1A	10	86756649	86932838	7.51907	6.99672	-0.103876	0.8958	0.99965	NEUTRAL
XLOC_005796	SNCG	10	86935539	87024732	0.484235	0.823292	0.765696	0.6949	0.99965	NEUTRAL
XLOC_005799	FAM35A	10	87050485	87191468	7.44896	6.65724	-0.162114	0.9163	0.99965	NEUTRAL
XLOC_005802	NUTM2D	10	87342735	87370695	0.767386	0.758208	-0.0173584	0.98365	0.99965	NEUTRAL
XLOC_005804	MINPP1	10	87504874	87553460	14.3511	11.322	-0.342033	0.51195	0.99965	NEUTRAL
XLOC_005807	PAPSS2	10	87607984	87747705	57.5021	42.85	-0.424321	0.42155	0.99965	NEUTRAL
XLOC_005808	CFL1P1	10	87751511	87845612	0.894214	0.87697	-0.0280934	0.97995	0.99965	NEUTRAL
XLOC_005809	PTEN	10	87859160	87971930	39.8437	40.061	0.00784759	0.99295	0.99965	NEUTRAL
XLOC_005820	STAMBPL1	10	88879733	89015785	3.01231	2.41885	-0.316546	0.88615	0.99965	NEUTRAL
XLOC_005822	FAS	10	88879733	89015785	31.3402	36.1247	0.20497	0.8433	0.99965	NEUTRAL
XLOC_005824	RP11-399O19.9	10	89015835	89017059	1.75695	2.24941	0.356473	0.6901	0.99965	NEUTRAL
XLOC_005827	IFIT2	10	89213568	89414557	0.999263	0.760825	-0.3933	0.84485	0.99965	NEUTRAL
XLOC_005828	IFIT3	10	89213568	89414557	2.65531	1.52662	-0.798536	0.55645	0.99965	NEUTRAL
XLOC_005831	IFIT1	10	89213568	89414557	0.788759	0.464738	-0.763166	0.8309	0.99965	NEUTRAL
XLOC_005832	IFIT5	10	89414585	89421001	3.732	3.71989	-0.00468897	0.9931	0.99965	NEUTRAL
XLOC_005842	RPP30	10	90871715	90908553	18.6869	15.9842	-0.225376	0.7148	0.99965	NEUTRAL
XLOC_005846	PCGF5	10	91163011	91284331	33.1019	44.7073	0.433594	0.4582	0.99965	NEUTRAL
XLOC_005847	HECTD2	10	91410284	91514829	3.24015	3.41417	0.0754762	0.89205	0.99965	NEUTRAL
XLOC_005849	TNKS2	10	91798311	91865276	14.2945	11.4919	-0.314836	0.52255	0.99965	NEUTRAL
XLOC_005852	BTAF1	10	91923768	92030325	6.38697	5.16438	-0.306536	0.54415	0.99965	NEUTRAL
XLOC_005858	MARCH5	10	92291162	92353964	23.4889	19.5047	-0.26816	0.6901	0.99965	NEUTRAL
XLOC_005861	KIF11	10	92593285	92655395	0.576035	0.565525	-0.0265661	0.97695	0.99965	NEUTRAL
XLOC_005863	HHEX	10	92689950	92695646	1.36709	1.04711	-0.384703	0.675	0.99965	NEUTRAL
XLOC_005867	CEP55	10	93496631	93529092	0.358904	0.544143	0.600388	0.50585	0.99965	NEUTRAL
XLOC_005873	SLC35G1	10	93893972	93956062	5.17224	6.73677	0.381266	0.5121	0.99965	NEUTRAL
XLOC_005875	PLCE1	10	93993988	94332823	1.36181	2.66761	0.970024	0.13915	0.99965	NEUTRAL
XLOC_005878	TBC1D12	10	94402503	94613905	2.34136	3.14388	0.425203	0.4589	0.99965	NEUTRAL
XLOC_005879	HELLS	10	94402503	94613905	0.352018	0.544731	0.629892	0.6445	0.99965	NEUTRAL
XLOC_005888	C10orf131,ENTPD1,RP11-248J23.7	10	95711778	96090238	0.882956	0.974956	0.142997	0.82195	0.99965	NEUTRAL
XLOC_005890	CCNJ	10	95711778	96090238	1.23529	1.48537	0.265982	0.7913	0.99965	NEUTRAL
XLOC_005893	ZNF518A	10	96129714	96271587	2.12879	1.74602	-0.285959	0.6881	0.99965	NEUTRAL
XLOC_005899	LCOR	10	96832259	96981043	3.38918	1.90566	-0.830645	0.38365	0.99965	NEUTRAL
XLOC_005900	C10orf12	10	96981283	96986212	1.64098	0.937771	-0.807251	0.266	0.99965	NEUTRAL
XLOC_005901	RP11-175O19.4	10	96992449	96995959	1.55399	1.03213	-0.590358	0.4712	0.99965	NEUTRAL
XLOC_005905	FRAT1	10	97319266	97321915	0.450157	0.423238	-0.0889608	0.93585	0.99965	NEUTRAL
XLOC_005907	RP11-452K12.7	10	97356357	97426076	1.8799	1.07071	-0.812092	0.74705	0.99965	NEUTRAL
XLOC_005908	PGAM1	10	97426159	97433441	307.381	200.835	-0.614014	0.3058	0.99965	NEUTRAL
XLOC_005909	ZDHHC16	10	97446130	97457370	12.5894	15.7891	0.326714	0.53615	0.99965	NEUTRAL
XLOC_005911	UBTD1	10	97498867	97571209	11.7415	17.7695	0.597782	0.28515	0.99965	NEUTRAL
XLOC_005913	HOGA1,PI4K2A,RP11-548K23.11	10	97584322	97676434	11.7018	9.42728	-0.311823	0.5498	0.99965	NEUTRAL
XLOC_005915	MARVELD1	10	97713172	97718152	48.7946	60.6299	0.313306	0.555	0.99965	NEUTRAL
XLOC_005916	ZFYVE27	10	97737120	97760907	12.2968	9.4036	-0.386997	0.45775	0.99965	NEUTRAL
XLOC_005918	R3HCC1L	10	98134623	98244897	4.23796	3.03732	-0.480568	0.4869	0.99965	NEUTRAL
XLOC_005927	CUTC,ENTPD7	10	99659505	99756134	15.8715	15.6487	-0.0204041	0.97665	0.99965	NEUTRAL
XLOC_005934	SCD	10	100347123	100364834	10.3101	8.69546	-0.245725	0.6209	0.99965	NEUTRAL
XLOC_005938	HIF1AN	10	100486641	100559998	7.78666	8.29856	0.0918548	0.91195	0.99965	NEUTRAL
XLOC_005940	FAM178A	10	100911102	100965136	5.27445	3.54568	-0.572957	0.31435	0.99965	NEUTRAL
XLOC_005942	SEMA4G	10	100969457	100994401	0.807912	0.960517	0.249614	0.84675	0.99965	NEUTRAL
XLOC_005944	C10orf2	10	100969457	100994401	3.75937	4.61004	0.294288	0.745	0.99965	NEUTRAL
XLOC_005945	LZTS2	10	100996617	101031157	36.1642	33.6566	-0.103671	0.85285	0.99965	NEUTRAL
XLOC_005946	SFXN3	10	101031233	101041244	19.2229	16.3802	-0.230872	0.66895	0.99965	NEUTRAL
XLOC_005953	BTRC	10	101354032	101557321	4.5966	6.33759	0.463365	0.4125	0.99965	NEUTRAL
XLOC_005954	DPCD	10	101570559	101609668	13.8815	14.4189	0.0547998	0.9471	0.99965	NEUTRAL
XLOC_005958	HPS6	10	102065389	102068038	7.75882	7.71986	-0.00726202	0.98865	0.99965	NEUTRAL
XLOC_005960	PPRC1	10	102132993	102150331	9.42751	11.0089	0.223716	0.68905	0.99965	NEUTRAL
XLOC_005961	NOLC1	10	102152175	102163871	16.7476	13.8568	-0.273359	0.58905	0.99965	NEUTRAL
XLOC_005962	ELOVL3	10	102226327	102229589	0.946614	1.59615	0.753751	0.4349	0.99965	NEUTRAL
XLOC_005963	GBF1	10	102245531	102382899	13.6035	11.6767	-0.220355	0.6622	0.99965	NEUTRAL
XLOC_005965	NFKB2	10	102394109	102402529	15.3216	11.6559	-0.394504	0.43755	0.99965	NEUTRAL
XLOC_005966	FBXL15	10	102402616	102423136	3.75456	3.29674	-0.187605	0.8175	0.99965	NEUTRAL
XLOC_005968	RPARP-AS1	10	102449816	102461106	0.517231	0.661918	0.355844	0.6694	0.99965	NEUTRAL
XLOC_005969	TMEM180	10	102461394	102477045	1.22887	1.0788	-0.187902	0.8628	0.99965	NEUTRAL
XLOC_005970	RP11-18I14.11	10	102479228	102502711	1.18992	1.03444	-0.202002	0.916	0.99965	NEUTRAL
XLOC_005971	SUFU	10	102503986	102633535	4.76776	5.20321	0.12609	0.825	0.99965	NEUTRAL
XLOC_005973	TRIM8	10	102644495	102658407	52.0534	43.8453	-0.247567	0.6381	0.99965	NEUTRAL
XLOC_005975	WBP1L	10	102743969	102816267	15.9477	26.1078	0.711133	0.15445	0.99965	NEUTRAL
XLOC_005979	AS3MT,C10orf32,C10orf32-ASMT	10	102854222	102901899	10.0066	11.7616	0.233137	0.7146	0.99965	NEUTRAL
XLOC_005981	CNNM2	10	102918292	103193306	1.30585	1.31935	0.0148358	0.9696	0.99965	NEUTRAL
XLOC_005987	TAF5	10	103367966	103396466	0.898913	0.773202	-0.217337	0.8896	0.99965	NEUTRAL
XLOC_005988	PDCD11	10	103396647	103446292	7.18025	10.7035	0.57598	0.2464	0.99965	NEUTRAL
XLOC_005989	RP11-225H22.7	10	103446785	103452402	3.26939	2.18129	-0.583839	0.74545	0.99965	NEUTRAL
XLOC_005996	SLK	10	103967200	104029233	9.07254	6.93264	-0.388101	0.4692	0.99965	NEUTRAL
XLOC_005997	SFR1	10	104122057	104126385	1.17084	1.1858	0.018318	0.98255	0.99965	NEUTRAL
XLOC_005998	GSTO1	10	104235355	104267459	101.178	94.4273	-0.0996145	0.8385	0.99965	NEUTRAL
XLOC_005999	GSTO2	10	104268872	104304945	0.807814	1.33987	0.729997	0.54485	0.99965	NEUTRAL
XLOC_006000	RP11-127L20.5	10	104309697	104338404	5.19451	3.21616	-0.691647	0.79405	0.99965	NEUTRAL
XLOC_006022	ADD3	10	109940103	110135565	31.9283	29.9278	-0.0933473	0.8581	0.99965	NEUTRAL
XLOC_006023	MXI1	10	110207604	110287365	22.847	16.7905	-0.444359	0.3661	0.99965	NEUTRAL
XLOC_006028	SMC3	10	110567690	110604636	10.4337	8.02187	-0.379241	0.4513	0.99965	NEUTRAL
XLOC_006033	PDCD4	10	110869742	110919274	52.0105	67.5992	0.378203	0.58395	0.99965	NEUTRAL
XLOC_006036	SHOC2	10	110919546	111013667	18.4616	17.9965	-0.0368183	0.938	0.99965	NEUTRAL
XLOC_006044	ACSL5	10	112374017	112446917	0.775693	0.998922	0.364887	0.7887	0.99965	NEUTRAL
XLOC_006045	VTI1A	10	112446997	112818744	5.62107	7.31328	0.379674	0.515	0.99965	NEUTRAL
XLOC_006047	RP11-57H14.4	10	112823489	112827726	1.75387	1.48983	-0.235388	0.73095	0.99965	NEUTRAL
XLOC_006050	TCF7L2	10	112950249	113167678	5.25568	5.25871	0.00083077	0.9982	0.99965	NEUTRAL
XLOC_006055	CASP7	10	113679161	113730907	5.71076	5.2217	-0.129164	0.82385	0.99965	NEUTRAL
XLOC_006058	NHLRC2	10	113854660	113917194	2.64322	2.20209	-0.263424	0.6049	0.99965	NEUTRAL
XLOC_006067	FAM160B1	10	114821743	114899832	17.7708	12.3	-0.530844	0.29795	0.99965	NEUTRAL
XLOC_006069	TRUB1	10	114938192	114977676	8.69532	7.46756	-0.219602	0.66935	0.99965	NEUTRAL
XLOC_006086	EMX2	10	117425193	117549546	2.44458	3.71328	0.60311	0.5703	0.99965	NEUTRAL
XLOC_006088	RP11-354M20.3	10	118004915	118210153	0.910259	1.59909	0.812903	0.63765	0.99965	NEUTRAL
XLOC_006089	CASC2	10	118004915	118210153	1.17232	2.15919	0.881124	0.663	0.99965	NEUTRAL
XLOC_006098	FAM45A	10	119104085	119137984	17.0115	26.7103	0.650888	0.2587	0.99965	NEUTRAL
XLOC_006099	GRK5	10	119207588	119459742	2.18255	1.34194	-0.701691	0.3871	0.99965	NEUTRAL
XLOC_006105	BAG3	10	119651369	119677819	31.3056	32.6933	0.0625748	0.8993	0.99965	NEUTRAL
XLOC_006106	INPP5F	10	119726096	119829278	5.32229	4.50401	-0.240836	0.65255	0.99965	NEUTRAL
XLOC_006108	SEC23IP	10	119892710	119944658	25.2812	19.1503	-0.400696	0.57085	0.99965	NEUTRAL
XLOC_006114	WDR11	10	120761811	120909524	13.2276	11.7687	-0.168591	0.72665	0.99965	NEUTRAL
XLOC_006123	TACC2	10	121989173	122254545	3.55722	4.10121	0.205301	0.7433	0.99965	NEUTRAL
XLOC_006126	PLEKHA1	10	122374695	122442602	14.8078	11.5121	-0.363203	0.5328	0.99965	NEUTRAL
XLOC_006136	PSTK	10	122930902	123008817	1.17716	2.12978	0.855396	0.4742	0.99965	NEUTRAL
XLOC_006137	ACADSB	10	123008978	123058311	3.40554	3.12978	-0.121822	0.8457	0.99965	NEUTRAL
XLOC_006140	BUB3	10	123154276	123170467	53.1484	42.1663	-0.333936	0.5984	0.99965	NEUTRAL
XLOC_006147	LHPP	10	124461833	124791870	4.5747	5.01554	0.132727	0.9083	0.99965	NEUTRAL
XLOC_006148	RP11-12J10.4	10	124461833	124791870	0.602419	0.368295	-0.709904	0.77795	0.99965	NEUTRAL
XLOC_006151	FAM175B	10	124801784	124836670	6.24903	5.13493	-0.283289	0.61135	0.99965	NEUTRAL
XLOC_006153	ZRANB1	10	124917142	125161170	12.8371	14.7884	0.204146	0.87625	0.99965	NEUTRAL
XLOC_006159	EDRF1	10	125683228	125764143	5.06594	4.58359	-0.144349	0.8252	0.99965	NEUTRAL
XLOC_006161	BCCIP	10	125823545	125896436	13.4131	13.6994	0.0304658	0.97105	0.99965	NEUTRAL
XLOC_006163	Metazoa_SRP	10	125823545	125896436	0.720094	0.65475	-0.137243	0.7967	0.99965	NEUTRAL
XLOC_006164	FANK1	10	125896538	126009592	2.5315	2.38947	-0.0833016	0.92675	0.99965	NEUTRAL
XLOC_006166	DOCK1	10	126905408	127452517	9.08671	9.61778	0.0819455	0.8625	0.99965	NEUTRAL
XLOC_006170	PTPRE	10	127907060	128085855	3.88167	4.09294	0.0764622	0.8854	0.99965	NEUTRAL
XLOC_006175	MGMT	10	129467183	129768007	14.7558	16.0265	0.119177	0.82455	0.99965	NEUTRAL
XLOC_006178	RP11-234G16.4	10	129835282	129963841	8.10481	5.24405	-0.628098	0.48415	0.99965	NEUTRAL
XLOC_006181	GLRX3	10	130136398	130184521	43.1951	37.7297	-0.195166	0.73785	0.99965	NEUTRAL
XLOC_006185	PPP2R2D	10	131900643	131959834	13.4643	12.3639	-0.123008	0.8294	0.99965	NEUTRAL
XLOC_006190	DPYSL4	10	132186899	132205776	10.2619	13.213	0.36466	0.5055	0.99965	NEUTRAL
XLOC_006191	LRRC27	10	132332153	132379918	2.92964	3.60978	0.301185	0.68215	0.99965	NEUTRAL
XLOC_006192	PWWP2B	10	132397167	132417863	2.38771	3.84101	0.685857	0.3192	0.99965	NEUTRAL
XLOC_006195	INPP5A	10	132537819	132786052	12.9016	8.02632	-0.684734	0.31005	0.99965	NEUTRAL
XLOC_006202	PRAP1,ZNF511	10	133278629	133352683	5.94422	9.72089	0.709599	0.78375	0.99965	NEUTRAL
XLOC_006203	MTG1,PAOX,RP11-108K14.8	10	133379233	133424572	11.6746	17.9183	0.618055	0.33345	0.99965	NEUTRAL
XLOC_006244	DIP2C	10	274189	689743	9.51729	10.6303	0.159553	0.79325	0.99965	NEUTRAL
XLOC_006248	LARP4B	10	806913	931705	14.7513	11.3626	-0.376553	0.44	0.99965	NEUTRAL
XLOC_006250	IDI2	10	971145	1049170	1.23943	1.50691	0.281909	0.80465	0.99965	NEUTRAL
XLOC_006251	IDI1	10	971145	1049170	12.0391	7.84993	-0.616973	0.54525	0.99965	NEUTRAL
XLOC_006261	RP11-118K6.3	10	3065423	3066001	0.717721	0.398023	-0.850572	0.6063	0.99965	NEUTRAL
XLOC_006262	PITRM1	10	3066332	3172841	29.3837	24.2566	-0.27664	0.7522	0.99965	NEUTRAL
XLOC_006266	KLF6	10	3775995	3785281	25.2006	23.9654	-0.0725055	0.886	0.99965	NEUTRAL
XLOC_006267	LINC00702	10	4201140	4243912	0.806949	0.90972	0.172944	0.87675	0.99965	NEUTRAL
XLOC_006285	ASB13	10	5638866	5666595	3.08521	4.25879	0.465072	0.467	0.99965	NEUTRAL
XLOC_006287	GDI2	10	5765222	5842132	71.7453	72.033	0.00577388	0.99015	0.99965	NEUTRAL
XLOC_006288	ANKRD16	10	5861616	5889906	1.67562	2.51994	0.58869	0.5636	0.99965	NEUTRAL
XLOC_006289	IL15RA	10	5890202	5978187	1.9664	1.78471	-0.139871	0.8887	0.99965	NEUTRAL
XLOC_006304	KIN	10	7750961	7787981	4.13285	4.55162	0.139244	0.91005	0.99965	NEUTRAL
XLOC_006316	SFTA1P	10	10784436	10794980	4.10139	2.59064	-0.662802	0.52325	0.99965	NEUTRAL
XLOC_006323	USP6NL	10	11453945	11612227	3.46565	2.24286	-0.627783	0.3566	0.99965	NEUTRAL
XLOC_006325	UPF2	10	11920021	12043170	3.45418	2.45773	-0.491018	0.38365	0.99965	NEUTRAL
XLOC_006329	NUDT5	10	12129636	12250589	24.5389	29.791	0.279803	0.74935	0.99965	NEUTRAL
XLOC_006330	RP11-186N15.3	10	12129636	12250589	0.733102	0.42381	-0.790595	0.71995	0.99965	NEUTRAL
XLOC_006342	PHYH	10	13277795	13302412	17.7739	21.3866	0.266944	0.5995	0.99965	NEUTRAL
XLOC_006344	SEPHS1	10	13317423	13348298	19.8703	20.8395	0.0687059	0.92125	0.99965	NEUTRAL
XLOC_006345	BEND7	10	13438483	13530262	3.34537	2.5136	-0.412411	0.58625	0.99965	NEUTRAL
XLOC_006348	FRMD4A	10	13586926	14462142	10.9427	6.83991	-0.677913	0.40055	0.99965	NEUTRAL
XLOC_006355	DCLRE1C	10	14878819	14954432	2.19745	2.06162	-0.0920499	0.9218	0.99965	NEUTRAL
XLOC_006366	FAM171A1	10	15211642	15371062	22.2601	13.5603	-0.715067	0.148	0.99965	NEUTRAL
XLOC_006368	FAM188A	10	15778169	15860520	11.2089	10.0445	-0.158233	0.78545	0.99965	NEUTRAL
XLOC_006372	RSU1	10	16590610	16817528	68.2211	63.7946	-0.0967828	0.8725	0.99965	NEUTRAL
XLOC_006378	RP11-124N14.3	10	17214238	17237593	78.7794	63.7647	-0.305059	0.9009	0.99965	NEUTRAL
XLOC_006380	HACD1	10	17589031	17617377	9.93639	11.8332	0.252048	0.7826	0.99965	NEUTRAL
XLOC_006386	NSUN6	10	18140676	18659285	2.32606	2.70644	0.218509	0.8073	0.99965	NEUTRAL
XLOC_006405	DNAJC1	10	21756536	22003769	12.0653	13.8243	0.196346	0.69865	0.99965	NEUTRAL
XLOC_006410	PIP4K2A	10	22534848	22714555	10.5279	14.4926	0.461104	0.3515	0.99965	NEUTRAL
XLOC_006417	ARHGAP21	10	24583608	24723668	17.6207	20.479	0.216876	0.6589	0.99965	NEUTRAL
XLOC_006418	PRTFDC1	10	24848606	24952604	3.2534	3.53073	0.118021	0.8926	0.99965	NEUTRAL
XLOC_006432	ABI1	10	26697658	26861087	20.2802	15.2023	-0.415782	0.45975	0.99965	NEUTRAL
XLOC_006436	ANKRD26	10	26991913	27100498	1.1749	0.713298	-0.719961	0.3408	0.99965	NEUTRAL
XLOC_006438	YME1L1	10	27110111	27186924	58.4561	47.8823	-0.287862	0.61765	0.99965	NEUTRAL
XLOC_006440	ACBD5	10	27195213	27242130	8.11419	6.0603	-0.421057	0.46625	0.99965	NEUTRAL
XLOC_006449	MKX	10	27672874	27767794	2.38758	2.70501	0.180086	0.7979	0.99965	NEUTRAL
XLOC_006451	ARMC4	10	27812163	27999048	0.673316	0.535612	-0.330094	0.74425	0.99965	NEUTRAL
XLOC_006452	MPP7	10	28050992	28334486	0.402964	0.45887	0.187432	0.8137	0.99965	NEUTRAL
XLOC_006458	WAC-AS1	10	28522651	28623112	2.91838	2.78821	-0.0658279	0.60475	0.99965	NEUTRAL
XLOC_006463	PTCHD3P1	10	29409401	29736781	18.5593	22.7994	0.296852	0.82845	0.99965	NEUTRAL
XLOC_006464	SVIL	10	29409401	29736781	5.38953	7.27238	0.432269	0.6074	0.99965	NEUTRAL
XLOC_006468	KIAA1462	10	30012799	30115494	29.7613	31.2065	0.0684118	0.90125	0.99965	NEUTRAL
XLOC_006471	RP11-305E6.4	10	30302825	30306066	1.31897	0.793645	-0.732848	0.35375	0.99965	NEUTRAL
XLOC_006472	MTPAP	10	30309800	30374448	3.53756	2.86301	-0.305221	0.6521	0.99965	NEUTRAL
XLOC_006479	ZNF438	10	30820206	31031937	1.36933	1.54396	0.173169	0.8211	0.99965	NEUTRAL
XLOC_006483	ZEB1-AS1	10	31187882	31529814	1.60016	2.49173	0.638933	0.6213	0.99965	NEUTRAL
XLOC_006488	ARHGAP12	10	31805403	31928876	9.49796	7.03675	-0.432709	0.4123	0.99965	NEUTRAL
XLOC_006490	KIF5B	10	32009009	32056431	40.0442	29.5632	-0.437788	0.4003	0.99965	NEUTRAL
XLOC_006495	EPC1	10	32266288	32378798	5.7414	5.66537	-0.0192343	0.9746	0.99965	NEUTRAL
XLOC_006499	ITGB1	10	32900318	33082102	918.821	508.553	-0.853385	0.34835	0.99965	NEUTRAL
XLOC_006510	PARD3	10	34109559	34815325	8.97837	5.89666	-0.606555	0.2764	0.99965	NEUTRAL
XLOC_006515	CUL2	10	35008550	35090642	13.5693	11.5205	-0.236134	0.64735	0.99965	NEUTRAL
XLOC_006521	RP11-324I22.4	10	35247024	35572669	0.358406	0.511642	0.513539	0.7831	0.99965	NEUTRAL
XLOC_006528	NAMPTP1	10	36521720	36524234	0.485817	0.322159	-0.592641	0.56855	0.99965	NEUTRAL
XLOC_006534	ZNF248	10	37775370	37859110	3.70002	2.03457	-0.862807	0.2278	0.99965	NEUTRAL
XLOC_006537	ZNF25	10	37949571	37976633	7.19301	5.99284	-0.263356	0.61765	0.99965	NEUTRAL
XLOC_006552	ZNF37BP	10	42513509	42552822	1.16171	0.799862	-0.538429	0.4196	0.99965	NEUTRAL
XLOC_006553	ZNF33B	10	42574184	42638568	0.761074	0.66887	-0.186311	0.8261	0.99965	NEUTRAL
XLOC_006562	HNRNPF	10	43385616	43409166	43.0378	45.8226	0.0904543	0.84985	0.99965	NEUTRAL
XLOC_006564	ZNF239	10	43556343	43574618	1.72098	2.25349	0.388934	0.6674	0.99965	NEUTRAL
XLOC_006567	ZNF32	10	43628816	43674703	10.7679	13.2003	0.293831	0.6274	0.99965	NEUTRAL
XLOC_006574	CXCL12	10	44370164	44386493	33.5755	33.4763	-0.00426818	0.9929	0.99965	NEUTRAL
XLOC_006581	C10orf10	10	44811023	44995891	21.2855	40.6498	0.933377	0.07	0.99965	NEUTRAL
XLOC_006583	CEP164P1,RP11-285G1.15,RSU1P2	10	44997697	45181427	2.49163	2.18661	-0.188391	0.82835	0.99965	NEUTRAL
XLOC_006592	MARCH8	10	45454584	45594906	8.39059	5.12959	-0.709929	0.19885	0.99965	NEUTRAL
XLOC_006593	ZFAND4	10	45615500	45672780	1.93202	2.87452	0.573207	0.4741	0.99965	NEUTRAL
XLOC_006598	AGAP4	10	45825593	45853875	1.38512	1.56229	0.173654	0.88525	0.99965	NEUTRAL
XLOC_006599	PARGP1	10	45854092	45972154	1.39754	1.79194	0.358631	0.7361	0.99965	NEUTRAL
XLOC_006600	NCOA4	10	46005087	46030714	57.1567	41.0183	-0.478655	0.3438	0.99965	NEUTRAL
XLOC_006605	RP11-38L15.3	10	46578216	46652025	5.23223	5.57215	0.0908076	0.93265	0.99965	NEUTRAL
XLOC_006606	FAM35BP,RHEBP1	10	46578216	46652025	0.465069	0.289234	-0.685208	0.68245	0.99965	NEUTRAL
XLOC_006615	AGAP9	10	47496211	47553514	2.33489	1.45287	-0.684446	0.4046	0.99965	NEUTRAL
XLOC_006638	VSTM4	10	48684875	49115509	5.00834	2.87407	-0.801236	0.12755	0.99965	NEUTRAL
XLOC_006643	ERCC6,ERCC6-PGBD3,PGBD3	10	49419276	49539538	13.5132	11.1463	-0.277804	0.60535	0.99965	NEUTRAL
XLOC_006645	PARG	10	49818278	49982053	5.97993	4.49889	-0.410559	0.5636	0.99965	NEUTRAL
XLOC_006649	ASAH2	10	50182777	50248610	0.480714	0.341707	-0.492418	0.5906	0.99965	NEUTRAL
XLOC_006650	SGMS1	10	50305585	50641451	7.13445	5.19322	-0.458174	0.3904	0.99965	NEUTRAL
XLOC_006663	CSTF2T	10	50991357	52314128	3.87197	4.93956	0.351312	0.58335	0.99965	NEUTRAL
XLOC_006664	PRKG1-AS1	10	50991357	52314128	0.35133	0.425393	0.275971	0.8906	0.99965	NEUTRAL
XLOC_006678	ZWINT	10	56357227	56361275	0.914866	1.61975	0.824138	0.40645	0.99965	NEUTRAL
XLOC_006688	FAM13C	10	59176589	59363181	1.17187	1.00996	-0.214513	0.7542	0.99965	NEUTRAL
XLOC_006691	SLC16A9	10	59650760	59736002	2.75563	1.60886	-0.776342	0.24815	0.99965	NEUTRAL
XLOC_006693	CCDC6	10	59788762	59906656	13.3872	11.6795	-0.196876	0.68575	0.99965	NEUTRAL
XLOC_006695	ANK3	10	60026297	60733490	1.80572	1.18358	-0.609417	0.4211	0.99965	NEUTRAL
XLOC_006696	RHOBTB1	10	60869437	61001440	6.77659	8.52096	0.330457	0.54855	0.99965	NEUTRAL
XLOC_006705	EGR2	10	62811995	62919900	0.650786	0.429066	-0.600983	0.5273	0.99965	NEUTRAL
XLOC_006707	JMJD1C	10	63167220	63466563	7.26478	5.33435	-0.445606	0.50435	0.99965	NEUTRAL
XLOC_006730	PBLD	10	68282659	68407294	1.99923	2.21466	0.147641	0.92955	0.99965	NEUTRAL
XLOC_006731	RUFY2	10	68282659	68407294	5.86753	4.50266	-0.381974	0.7048	0.99965	NEUTRAL
XLOC_006732	DNA2	10	68414063	68472121	0.659559	0.833958	0.338472	0.7132	0.99965	NEUTRAL
XLOC_006743	TACR2	10	69403902	69416867	0.536817	0.559207	0.0589499	0.95845	0.99965	NEUTRAL
XLOC_006755	TYSND1	10	70137980	70146676	1.89451	2.43286	0.360825	0.62035	0.99965	NEUTRAL
XLOC_006756	SAR1A	10	70147288	70170523	43.8784	59.1527	0.430932	0.4194	0.99965	NEUTRAL
XLOC_006758	PPA1	10	70202829	70233911	46.162	55.6084	0.268597	0.574	0.99965	NEUTRAL
XLOC_006760	LRRC20	10	70298969	70382650	0.850688	1.41945	0.738632	0.3802	0.99965	NEUTRAL
XLOC_006766	PCBD1	10	70882279	70888784	22.1516	23.4595	0.0827567	0.8771	0.99965	NEUTRAL
XLOC_006770	C10orf54	10	71396933	71815947	104.135	207.27	0.993054	0.2786	0.99965	NEUTRAL
XLOC_006771	PSAP	10	71816297	71851369	451.261	467.626	0.0513929	0.9498	0.99965	NEUTRAL
XLOC_006776	ASCC1	10	72096031	72235860	8.5172	11.3889	0.419176	0.575	0.99965	NEUTRAL
XLOC_006778	DNAJB12	10	72332829	72355230	12.1151	13.5986	0.166653	0.75015	0.99965	NEUTRAL
XLOC_006779	MICU1	10	72367326	72626191	22.5043	23.7945	0.0804292	0.86465	0.99965	NEUTRAL
XLOC_006789	RP11-152N13.16	10	73110374	73358859	0.469239	0.618026	0.397343	0.855	0.99965	NEUTRAL
XLOC_006791	ECD	10	73110374	73358859	10.5214	11.0235	0.0672479	0.95445	0.99965	NEUTRAL
XLOC_006792	DNAJC9,MRPS16	10	73110374	73358859	17.4465	27.9268	0.678717	0.41405	0.99965	NEUTRAL
XLOC_006795	ANXA7	10	73375100	73414076	60.6975	58.9536	-0.0420557	0.93875	0.99965	NEUTRAL
XLOC_006797	MSS51	10	73423578	73433561	0.468392	0.447335	-0.066361	0.9414	0.99965	NEUTRAL
XLOC_006798	PPP3CB	10	73436427	73625953	18.5892	18.6968	0.00832292	0.98715	0.99965	NEUTRAL
XLOC_006799	USP54	10	73436427	73625953	1.58509	2.18258	0.461474	0.6395	0.99965	NEUTRAL
XLOC_006803	AGAP5	10	73644880	73730487	2.97303	2.13536	-0.477455	0.61435	0.99965	NEUTRAL
XLOC_006805	RP11-574K11.24	10	73742994	73744230	2.21105	1.87325	-0.239188	0.78555	0.99965	NEUTRAL
XLOC_006806	RP11-574K11.32	10	73744383	73780251	8.50383	8.48516	-0.00316978	0.99745	0.99965	NEUTRAL
XLOC_006807	NDST2,RP11-574K11.31	10	73785581	73811798	7.81239	8.22514	0.0742754	0.92775	0.99965	NEUTRAL
XLOC_006808	CAMK2G	10	73812500	73874591	10.3949	9.87042	-0.0746941	0.8909	0.99965	NEUTRAL
XLOC_006810	AP3M1	10	73995192	74151063	13.5672	11.6126	-0.224442	0.9291	0.99965	NEUTRAL
XLOC_006822	COMTD1	10	75233968	75236030	1.63617	2.50384	0.613815	0.5218	0.99965	NEUTRAL
XLOC_006825	ZNF503	10	75269818	75411842	11.7757	22.8135	0.954074	0.0616	0.99965	NEUTRAL
XLOC_006838	KCNMA1	10	76869600	77638595	30.9713	21.0965	-0.553923	0.34365	0.99965	NEUTRAL
XLOC_006842	DLG5	10	77782865	77926526	11.7215	13.4239	0.195654	0.6876	0.99965	NEUTRAL
XLOC_006844	POLR3A	10	77969250	78029545	5.99516	4.40027	-0.446206	0.36685	0.99965	NEUTRAL
XLOC_006847	ZMIZ1-AS1	10	78943327	79067895	0.984771	0.852253	-0.208507	0.81615	0.99965	NEUTRAL
XLOC_006849	ZCCHC24	10	79382324	79445627	10.735	16.392	0.61067	0.22245	0.99965	NEUTRAL
XLOC_006858	NUTM2B-AS1	10	79660890	79827602	7.9007	6.6592	-0.24663	0.7328	0.99965	NEUTRAL
XLOC_006859	RP11-119F19.5	10	79660890	79827602	0.58318	0.386309	-0.594185	0.5156	0.99965	NEUTRAL
XLOC_006860	RP11-119F19.4	10	79660890	79827602	1.04302	1.00417	-0.0547656	0.8694	0.99965	NEUTRAL
XLOC_006870	TMEM254-AS1	10	80046859	80092557	0.330246	0.654183	0.986151	0.5535	0.99965	NEUTRAL
XLOC_006871	RP11-369J21.12	10	80046859	80092557	11.0317	14.4731	0.391724	0.7669	0.99965	NEUTRAL
XLOC_006872	ANXA11	10	80150888	80205572	47.7504	65.5616	0.457337	0.36925	0.99965	NEUTRAL
XLOC_006904	WAPAL	10	86435255	86521815	12.0861	10.4798	-0.205742	0.70735	0.99965	NEUTRAL
XLOC_006911	GLUD1	10	87050485	87191468	27.169	30.1065	0.148111	0.7778	0.99965	NEUTRAL
XLOC_006913	NUTM2A-AS1	10	87203874	87342612	14.1388	13.8177	-0.0331438	0.96435	0.99965	NEUTRAL
XLOC_006919	ATAD1	10	87751511	87845612	18.8114	17.5482	-0.100285	0.8393	0.99965	NEUTRAL
XLOC_006925	RNLS	10	88273863	88584530	3.9949	5.5633	0.477781	0.59065	0.99965	NEUTRAL
XLOC_006932	CH25H	10	89205628	89207314	0.528093	0.441074	-0.259771	0.82295	0.99965	NEUTRAL
XLOC_006933	LIPA	10	89213568	89414557	11.296	11.8285	0.0664602	0.9102	0.99965	NEUTRAL
XLOC_006936	PANK1	10	89579496	89650822	1.74125	2.45701	0.496775	0.53875	0.99965	NEUTRAL
XLOC_006962	IDE	10	92451683	92574076	8.58242	6.7945	-0.337017	0.5725	0.99965	NEUTRAL
XLOC_006971	MYOF	10	93306428	93482317	36.6981	33.3451	-0.138233	0.7995	0.99965	NEUTRAL
XLOC_006974	FRA10AC1	10	93667882	93702572	6.40442	6.59663	0.0426614	0.94985	0.99965	NEUTRAL
XLOC_006983	NOC3L	10	94333225	94362959	6.46463	5.67384	-0.188241	0.71845	0.99965	NEUTRAL
XLOC_006993	PDLIM1	10	95237571	95291024	76.7513	58.7046	-0.386718	0.44365	0.99965	NEUTRAL
XLOC_006995	ALDH18A1	10	95605928	95656706	35.5487	41.5942	0.226585	0.65665	0.99965	NEUTRAL
XLOC_006996	TCTN3	10	95663395	95694143	16.4266	19.2268	0.227083	0.64335	0.99965	NEUTRAL
XLOC_006997	ENTPD1-AS1	10	95711778	96090238	2.09305	3.15332	0.591263	0.62965	0.99965	NEUTRAL
XLOC_007005	TM9SF3	10	96518108	96587452	91.9878	74.8692	-0.29707	0.6997	0.99965	NEUTRAL
XLOC_007010	ARHGAP19,ARHGAP19-SLIT1,SLIT1	10	96998037	97292673	0.934395	0.886997	-0.0751032	0.9087	0.99965	NEUTRAL
XLOC_007012	FRAT2	10	97332496	97343203	1.09386	1.31286	0.263276	0.7523	0.99965	NEUTRAL
XLOC_007013	RRP12	10	97356357	97426076	8.8698	8.89263	0.00370861	0.9939	0.99965	NEUTRAL
XLOC_007016	EXOSC1	10	97436141	97446017	12.7727	12.5086	-0.0301387	0.963	0.99965	NEUTRAL
XLOC_007017	MMS19	10	97458323	97498794	16.4685	18.0518	0.132435	0.804	0.99965	NEUTRAL
XLOC_007018	MORN4	10	97584322	97676434	6.09907	7.05119	0.209278	0.86755	0.99965	NEUTRAL
XLOC_007019	AVPI1	10	97677423	97687323	16.4931	21.2284	0.364137	0.495	0.99965	NEUTRAL
XLOC_007026	PYROXD2	10	98383564	98415184	2.76115	4.03653	0.547845	0.43225	0.99965	NEUTRAL
XLOC_007027	HPS1	10	98416197	98446947	28.1809	35.1954	0.32067	0.52545	0.99965	NEUTRAL
XLOC_007032	GOT1	10	99396869	99430624	10.7921	12.1581	0.171945	0.7531	0.99965	NEUTRAL
XLOC_007034	SLC25A28	10	99610521	99620609	19.1708	23.3976	0.287455	0.6217	0.99965	NEUTRAL
XLOC_007037	COX15	10	99659505	99756134	6.32281	7.17578	0.182569	0.8325	0.99965	NEUTRAL
XLOC_007043	CHUK,ERLIN1	10	100150093	100229619	29.7462	27.7751	-0.0989098	0.86125	0.99965	NEUTRAL
XLOC_007044	CWF19L1	10	100229666	100267680	7.54668	10.2952	0.448062	0.5407	0.99965	NEUTRAL
XLOC_007045	SNORA12	10	100229666	100267680	13.1907	6.84206	-0.947017	0.72055	0.99965	NEUTRAL
XLOC_007046	BLOC1S2	10	100273279	100286712	34.5217	26.2119	-0.397284	0.4421	0.99965	NEUTRAL
XLOC_007050	NDUFB8,RP11-411B6.6,SEC31B	10	100486641	100559998	65.0308	69.285	0.0914188	0.919	0.99965	NEUTRAL
XLOC_007054	MRPL43	10	100969457	100994401	24.782	26.2989	0.0857116	0.89395	0.99965	NEUTRAL
XLOC_007064	POLL	10	101570559	101609668	6.38899	7.47385	0.226263	0.75145	0.99965	NEUTRAL
XLOC_007065	FBXW4	10	101610663	101695295	15.0704	20.4252	0.438632	0.4978	0.99965	NEUTRAL
XLOC_007068	NPM3	10	101781324	101783413	11.6274	18.174	0.644345	0.32505	0.99965	NEUTRAL
XLOC_007069	MGEA5	10	101784442	101818465	54.106	36.9025	-0.55207	0.2733	0.99965	NEUTRAL
XLOC_007071	C10orf76	10	101845598	102056193	5.41375	4.70263	-0.203162	0.7149	0.99965	NEUTRAL
XLOC_007076	LDB1	10	102107559	102120453	21.2555	25.943	0.287509	0.5535	0.99965	NEUTRAL
XLOC_007078	PSD	10	102402616	102423136	0.748269	0.59015	-0.342477	0.8379	0.99965	NEUTRAL
XLOC_007079	CUEDC2	10	102423244	102432661	34.0392	38.6775	0.184297	0.72565	0.99965	NEUTRAL
XLOC_007081	ACTR1A	10	102479228	102502711	49.2543	53.5749	0.121309	0.8145	0.99965	NEUTRAL
XLOC_007083	RP11-47A8.5	10	102642791	102644140	2.64267	2.19092	-0.270457	0.7494	0.99965	NEUTRAL
XLOC_007084	ARL3	10	102673730	102714407	6.47855	6.92592	0.0963334	0.85365	0.99965	NEUTRAL
XLOC_007088	NT5C2	10	102918292	103193306	38.5854	33.3971	-0.208333	0.67875	0.99965	NEUTRAL
XLOC_007091	PCGF6	10	103302795	103351134	3.56162	3.41805	-0.0593595	0.9293	0.99965	NEUTRAL
XLOC_007093	USMG5	10	103367966	103396466	194.731	162.385	-0.26206	0.6332	0.99965	NEUTRAL
XLOC_007094	CALHM2	10	103446785	103452402	9.1741	6.71238	-0.450742	0.4571	0.99965	NEUTRAL
XLOC_007098	SH3PXD2A	10	103594026	103855543	15.9618	17.3769	0.122552	0.81645	0.99965	NEUTRAL
XLOC_007099	RP11-541N10.3	10	103877373	103879761	0.589418	0.359231	-0.714381	0.50025	0.99965	NEUTRAL
XLOC_007100	OBFC1	10	103882541	103918205	10.5417	10.7476	0.0279063	0.9608	0.99965	NEUTRAL
XLOC_007106	ITPRIP	10	104309697	104338404	22.3687	21.5424	-0.0542982	0.91365	0.99965	NEUTRAL
XLOC_007118	XPNPEP1	10	109864765	109923553	25.8396	31.7578	0.297523	0.5447	0.99965	NEUTRAL
XLOC_007122	SMNDC1	10	110290729	110304951	13.9797	12.5835	-0.151801	0.81675	0.99965	NEUTRAL
XLOC_007127	BBIP1	10	110869742	110919274	6.66277	5.92844	-0.168471	0.85615	0.99965	NEUTRAL
XLOC_007131	GPAM	10	112149863	112215377	16.5404	24.0448	0.539729	0.28925	0.99965	NEUTRAL
XLOC_007133	ZDHHC6	10	112374017	112446917	14.2527	19.4695	0.449978	0.3958	0.99965	NEUTRAL
XLOC_007136	RP11-57H14.2	10	112950249	113167678	0.718366	0.96463	0.425257	0.81095	0.99965	NEUTRAL
XLOC_007140	DCLRE1A	10	113834724	113854383	1.75487	1.57121	-0.159486	0.81805	0.99965	NEUTRAL
XLOC_007141	CCDC186	10	114120861	114174220	2.51816	1.48196	-0.76487	0.28775	0.99965	NEUTRAL
XLOC_007147	ABLIM1	10	114431112	114685003	0.84131	1.05661	0.328735	0.696	0.99965	NEUTRAL
XLOC_007153	GFRA1	10	116056924	116273467	4.92309	9.24777	0.909542	0.09915	0.99965	NEUTRAL
XLOC_007156	HSPA12A	10	116663695	116742574	1.94563	1.58162	-0.298837	0.6241	0.99965	NEUTRAL
XLOC_007159	KIAA1598	10	116828760	117126586	1.2011	1.30529	0.120018	0.8993	0.99965	NEUTRAL
XLOC_007166	RP11-129M16.4	10	117239599	117375467	1.9799	1.50935	-0.391495	0.5953	0.99965	NEUTRAL
XLOC_007167	PDZD8	10	117239599	117375467	11.8013	9.66772	-0.287693	0.6698	0.99965	NEUTRAL
XLOC_007171	RAB11FIP2	10	118004915	118210153	5.22051	7.51156	0.524924	0.30445	0.99965	NEUTRAL
XLOC_007172	FAM204A	10	118297929	118342328	17.4524	14.5888	-0.258562	0.7183	0.99965	NEUTRAL
XLOC_007175	CACUL1	10	118674166	118755249	8.31354	6.07199	-0.453292	0.4203	0.99965	NEUTRAL
XLOC_007180	EIF3A	10	119029715	119080823	50.1268	44.0983	-0.184858	0.7394	0.99965	NEUTRAL
XLOC_007183	SFXN4	10	119140766	119165667	4.33099	5.9033	0.446824	0.5286	0.99965	NEUTRAL
XLOC_007184	PRDX3	10	119167702	119178833	64.0977	77.8047	0.279585	0.5669	0.99965	NEUTRAL
XLOC_007186	RGS10	10	119499827	119542708	15.1051	7.95459	-0.92518	0.18155	0.99965	NEUTRAL
XLOC_007188	TIAL1	10	119571801	119597029	28.3521	25.4453	-0.156057	0.78785	0.99965	NEUTRAL
XLOC_007191	MCMBP	10	119829403	119892556	17.5073	20.402	0.220756	0.6632	0.99965	NEUTRAL
XLOC_007199	RP11-95I16.4	10	120761811	120909524	0.920385	0.8063	-0.19092	0.8973	0.99965	NEUTRAL
XLOC_007203	FGFR2	10	121478333	121598458	2.97145	5.41933	0.866945	0.09365	0.99965	NEUTRAL
XLOC_007205	ATE1	10	121740420	121951965	4.55926	4.2773	-0.0920994	0.86595	0.99965	NEUTRAL
XLOC_007207	NSMCE4A	10	121956781	121975217	6.03464	5.78732	-0.0603719	0.93275	0.99965	NEUTRAL
XLOC_007209	CUZD1,FAM24B	10	122832148	122879641	4.07418	4.90379	0.267388	0.7671	0.99965	NEUTRAL
XLOC_007210	C10orf88	10	122930902	123008817	6.60846	4.5812	-0.52859	0.5224	0.99965	NEUTRAL
XLOC_007211	IKZF5	10	122930902	123008817	4.43288	2.36127	-0.908677	0.20805	0.99965	NEUTRAL
XLOC_007220	CHST15	10	124007665	124093607	10.4029	9.99707	-0.0574083	0.91255	0.99965	NEUTRAL
XLOC_007221	OAT	10	124397302	124418976	70.1981	57.1579	-0.29648	0.55335	0.99965	NEUTRAL
XLOC_007224	FAM53B,METTL10,RP11-12J10.3	10	124461833	124791870	8.9358	8.21165	-0.121925	0.87965	0.99965	NEUTRAL
XLOC_007227	CTBP2	10	124917142	125161170	16.3123	16.333	0.00183319	0.99795	0.99965	NEUTRAL
XLOC_007232	EDRF1-AS1,FLJ37035,RP11-383C5.8	10	125683228	125764143	1.15792	1.4848	0.358734	0.64105	0.99965	NEUTRAL
XLOC_007235	UROS	10	125784979	125823248	31.9684	32.4906	0.0233745	0.96025	0.99965	NEUTRAL
XLOC_007236	DHX32	10	125823545	125896436	12.0744	11.8963	-0.0214363	0.97365	0.99965	NEUTRAL
XLOC_007243	LINC00601	10	126413868	126421879	0.337298	0.54134	0.682511	0.60225	0.99965	NEUTRAL
XLOC_007257	EBF3	10	129835282	129963841	4.978	4.25061	-0.227897	0.7024	0.99965	NEUTRAL
XLOC_007268	BNIP3	10	131966454	131981931	46.0731	30.8582	-0.578269	0.264	0.99965	NEUTRAL
XLOC_007270	STK32C	10	132207491	132331847	3.56085	5.11366	0.522134	0.5749	0.99965	NEUTRAL
XLOC_007274	NKX6-2	10	132537819	132786052	2.04957	2.62731	0.35827	0.90535	0.99965	NEUTRAL
XLOC_007283	TUBGCP2	10	133278629	133352683	16.5251	17.3703	0.0719608	0.90355	0.99965	NEUTRAL
XLOC_007288	FUOM	10	133355153	133358035	7.02696	6.71497	-0.0655209	0.9396	0.99965	NEUTRAL
XLOC_007289	ECHS1	10	133362479	133373689	45.0425	51.1808	0.184315	0.7044	0.99965	NEUTRAL
XLOC_007292	SPRN	10	133379233	133424572	1.38355	1.76122	0.348199	0.7553	0.99965	NEUTRAL
XLOC_007307	RP11-304M2.5	11	127203	207428	17.6012	23.3049	0.404956	0.7609	0.99965	NEUTRAL
XLOC_007308	RIC8A	11	207510	215113	43.0524	42.9112	-0.00473982	0.99135	0.99965	NEUTRAL
XLOC_007309	PSMD13	11	215457	252984	46.1666	43.3382	-0.0912105	0.8721	0.99965	NEUTRAL
XLOC_007312	ATHL1	11	289134	296107	10.248	10.9743	0.0987849	0.86975	0.99965	NEUTRAL
XLOC_007318	B4GALNT4	11	369795	382116	2.45437	1.46417	-0.745272	0.49925	0.99965	NEUTRAL
XLOC_007319	PKP3	11	392613	404908	0.364141	0.436646	0.261968	0.7895	0.99965	NEUTRAL
XLOC_007320	PTDSS2	11	448267	491399	13.7436	17.4965	0.348308	0.4696	0.99965	NEUTRAL
XLOC_007324	RASSF7	11	537526	564021	2.94705	1.68788	-0.804055	0.36855	0.99965	NEUTRAL
XLOC_007325	PHRF1	11	576485	612222	8.47561	7.19179	-0.236966	0.6413	0.99965	NEUTRAL
XLOC_007328	EPS8L2	11	644232	727727	17.6835	10.3574	-0.771748	0.23095	0.99965	NEUTRAL
XLOC_007329	TMEM80	11	644232	727727	3.24426	4.94587	0.608332	0.64365	0.99965	NEUTRAL
XLOC_007330	TALDO1	11	747328	765024	132.598	172.137	0.376492	0.4635	0.99965	NEUTRAL
XLOC_007331	AP006621.5	11	777577	784297	0.663402	0.906914	0.451083	0.78085	0.99965	NEUTRAL
XLOC_007332	CMB9-55F22.1	11	777577	784297	0.39077	0.600136	0.618971	0.69315	0.99965	NEUTRAL
XLOC_007334	PANO1	11	790474	812880	0.585995	1.05178	0.843873	0.7303	0.99965	NEUTRAL
XLOC_007335	RPLP2	11	790474	812880	895.153	1295.91	0.533756	0.47285	0.99965	NEUTRAL
XLOC_007336	PNPLA2	11	818901	842545	46.4797	61.5448	0.405037	0.8113	0.99965	NEUTRAL
XLOC_007338	CD151	11	818901	842545	422.784	327.733	-0.367398	0.6356	0.99965	NEUTRAL
XLOC_007339	TSPAN4	11	842807	867116	99.689	102.223	0.0362145	0.95595	0.99965	NEUTRAL
XLOC_007340	AP2A2	11	924893	1012245	18.9138	25.4597	0.428779	0.37505	0.99965	NEUTRAL
XLOC_007347	TOLLIP-AS1	11	1309768	1310707	0.491866	0.484021	-0.0231969	0.93795	0.99965	NEUTRAL
XLOC_007348	BRSK2	11	1389898	1462689	0.373933	0.422524	0.176256	0.8602	0.99965	NEUTRAL
XLOC_007363	MRPL23	11	1947277	1989920	1.95776	3.20369	0.71053	0.48015	0.99965	NEUTRAL
XLOC_007373	CD81	11	2328748	2397419	402.355	421.813	0.0681346	0.9197	0.99965	NEUTRAL
XLOC_007374	TSSC4	11	2400487	2403878	12.0651	14.9638	0.310637	0.5845	0.99965	NEUTRAL
XLOC_007384	SLC22A18	11	2887779	2925246	9.17567	9.7241	0.0837512	0.9108	0.99965	NEUTRAL
XLOC_007402	PGAP2	11	3665586	3826371	6.49795	7.45831	0.198863	0.7915	0.99965	NEUTRAL
XLOC_007403	STIM1	11	3854317	4093210	27.9783	54.111	0.951614	0.1393	0.99965	NEUTRAL
XLOC_007407	RRM1	11	4094706	4138876	23.8903	21.2782	-0.167045	0.7401	0.99965	NEUTRAL
XLOC_007453	TRIM34,TRIM6,TRIM6-TRIM34	11	5248082	5645789	5.20996	3.46197	-0.589679	0.3225	0.99965	NEUTRAL
XLOC_007454	OR56B1,TRIM22	11	5663556	5938619	44.2463	39.4896	-0.164083	0.78575	0.99965	NEUTRAL
XLOC_007475	SMPD1	11	6390430	6394998	76.7255	71.3781	-0.104225	0.83535	0.99965	NEUTRAL
XLOC_007476	DNHD1,TIMM10B	11	6474682	6593758	12.7064	15.9273	0.32594	0.64435	0.99965	NEUTRAL
XLOC_007477	ILK	11	6595074	6612667	24.3958	32.943	0.433341	0.6451	0.99965	NEUTRAL
XLOC_007487	ZNF215	11	6926403	6984632	1.31122	1.07381	-0.288162	0.7091	0.99965	NEUTRAL
XLOC_007494	PPFIBP2	11	7513297	7657127	5.46296	8.93935	0.710486	0.40175	0.99965	NEUTRAL
XLOC_007500	EIF3F	11	7970250	8001862	152.257	182.396	0.260566	0.63325	0.99965	NEUTRAL
XLOC_007502	TUB	11	8019243	8169055	5.43296	5.56727	0.0352316	0.9469	0.99965	NEUTRAL
XLOC_007507	RPL27A	11	8682410	8910951	918.643	1101.83	0.262329	0.72495	0.99965	NEUTRAL
XLOC_007508	RP11-152H18.3	11	8682410	8910951	5.33542	10.659	0.998404	0.7148	0.99965	NEUTRAL
XLOC_007511	AKIP1	11	8911138	8933006	13.3076	17.8402	0.422877	0.4808	0.99965	NEUTRAL
XLOC_007515	IPO7	11	9384621	9448126	42.8746	29.5659	-0.53619	0.2918	0.99965	NEUTRAL
XLOC_007518	ZNF143	11	9459555	9528524	7.8199	4.66714	-0.74461	0.34035	0.99965	NEUTRAL
XLOC_007520	WEE1	11	9573680	9593457	11.7695	8.8019	-0.419162	0.46875	0.99965	NEUTRAL
XLOC_007523	SWAP70	11	9664076	9752991	13.6233	14.0385	0.043314	0.9301	0.99965	NEUTRAL
XLOC_007529	AMPD3	11	10308312	10507579	6.80625	4.31618	-0.657107	0.20655	0.99965	NEUTRAL
XLOC_007532	CTR9	11	10750986	10779743	9.62027	8.12083	-0.24445	0.60215	0.99965	NEUTRAL
XLOC_007535	ZBED5-AS1	11	10809296	10906802	2.02634	1.77199	-0.193508	0.921	0.99965	NEUTRAL
XLOC_007539	RP11-567I13.1	11	11270875	11622005	0.493496	0.383568	-0.363554	0.77075	0.99965	NEUTRAL
XLOC_007541	USP47	11	11841422	11959323	23.7943	17.7145	-0.425683	0.44965	0.99965	NEUTRAL
XLOC_007545	MICAL2	11	12094007	12263789	91.1058	53.9408	-0.756166	0.2003	0.99965	NEUTRAL
XLOC_007550	PARVA	11	12377184	12530801	71.588	77.6703	0.117643	0.84385	0.99965	NEUTRAL
XLOC_007551	TEAD1	11	12674590	12944483	28.0363	33.9946	0.278007	0.61445	0.99965	NEUTRAL
XLOC_007556	ARNTL	11	13276651	13387266	6.28408	5.78106	-0.120368	0.82725	0.99965	NEUTRAL
XLOC_007560	FAR1	11	13668669	13732346	13.6753	13.1987	-0.0511761	0.9217	0.99965	NEUTRAL
XLOC_007564	SPON1	11	13962688	14273691	0.701213	0.460558	-0.606469	0.6409	0.99965	NEUTRAL
XLOC_007580	C11orf58	11	15966448	16756881	84.8945	71.4123	-0.249498	0.6812	0.99965	NEUTRAL
XLOC_007586	NUCB2	11	17208152	17349974	77.9882	46.4209	-0.74848	0.1817	0.99965	NEUTRAL
XLOC_007588	NCR3LG1	11	17351725	17377341	0.65343	0.887398	0.441549	0.54805	0.99965	NEUTRAL
XLOC_007589	RP1-239B22.5	11	17380648	17383531	0.544235	0.727475	0.418668	0.6656	0.99965	NEUTRAL
XLOC_007599	RP11-113D6.10	11	18112471	18248643	0.419356	0.581702	0.472103	0.71835	0.99965	NEUTRAL
XLOC_007602	GTF2H1	11	18322294	18367044	18.7521	19.7487	0.0747112	0.8888	0.99965	NEUTRAL
XLOC_007604	LDHA	11	18394387	18408425	1631.21	1094.82	-0.575249	0.54115	0.99965	NEUTRAL
XLOC_007609	SPTY2D1-AS1	11	18599786	18634791	0.822194	0.722924	-0.185634	0.9274	0.99965	NEUTRAL
XLOC_007616	ZDHHC13	11	19117098	19176422	4.7608	3.95633	-0.267042	0.65635	0.99965	NEUTRAL
XLOC_007619	NAV2	11	19350723	20121598	2.81501	5.50221	0.966872	0.1054	0.99965	NEUTRAL
XLOC_007623	HTATIP2	11	20363684	20383783	8.36929	10.303	0.299894	0.6455	0.99965	NEUTRAL
XLOC_007624	PRMT3	11	20387529	20509294	8.11875	7.40997	-0.13179	0.8117	0.99965	NEUTRAL
XLOC_007659	BDNF-AS	11	27506837	27877648	0.922939	0.572302	-0.689457	0.5756	0.99965	NEUTRAL
XLOC_007663	METTL15	11	28020619	28333507	5.43926	3.4861	-0.641795	0.26595	0.99965	NEUTRAL
XLOC_007680	ARL14EP	11	30323050	30338227	13.1216	10.1255	-0.373954	0.56135	0.99965	NEUTRAL
XLOC_007686	DNAJC24	11	31369839	31431849	8.79114	5.4846	-0.680664	0.2314	0.99965	NEUTRAL
XLOC_007687	ELP4	11	31509749	31783998	6.09153	5.37427	-0.180735	0.7766	0.99965	NEUTRAL
XLOC_007688	RCN1	11	31784791	32105755	163.474	216.397	0.404618	0.47935	0.99965	NEUTRAL
XLOC_007696	EIF3M	11	32583797	32794658	104.445	111.082	0.0888746	0.873	0.99965	NEUTRAL
XLOC_007699	QSER1	11	32893177	32993316	6.6001	4.52288	-0.545244	0.2654	0.99965	NEUTRAL
XLOC_007701	TCP11L1	11	33039416	33191598	9.75289	10.4736	0.10285	0.90025	0.99965	NEUTRAL
XLOC_007702	LINC00294	11	33039416	33191598	4.9514	3.25654	-0.604495	0.56855	0.99965	NEUTRAL
XLOC_007705	HIPK3	11	33256671	33357023	11.8001	9.04468	-0.383662	0.4527	0.99965	NEUTRAL
XLOC_007715	CAPRIN1	11	34051682	34101156	53.4085	60.0841	0.169913	0.7517	0.99965	NEUTRAL
XLOC_007716	NAT10	11	34105601	34147670	9.212	9.57181	0.0552781	0.90675	0.99965	NEUTRAL
XLOC_007719	CAT	11	34438924	34472062	23.8655	31.5358	0.402064	0.377	0.99965	NEUTRAL
XLOC_007724	PDHX	11	34853093	35020591	18.7301	15.4447	-0.278246	0.6523	0.99965	NEUTRAL
XLOC_007732	FJX1	11	35618418	35620868	7.19548	5.9473	-0.274857	0.61555	0.99965	NEUTRAL
XLOC_007734	TRIM44	11	35662804	35818007	21.7199	18.7611	-0.211269	0.747	0.99965	NEUTRAL
XLOC_007735	LDLRAD3	11	35943980	36232136	3.80552	7.13756	0.907336	0.08995	0.99965	NEUTRAL
XLOC_007739	PRR5L	11	36296287	36465204	3.49931	6.1516	0.813888	0.1716	0.99965	NEUTRAL
XLOC_007743	C11orf74	11	36510708	36659290	10.9744	8.86001	-0.308767	0.682	0.99965	NEUTRAL
XLOC_007765	API5	11	43311962	43494933	24.4038	20.993	-0.217201	0.7334	0.99965	NEUTRAL
XLOC_007767	TTC17	11	43311962	43494933	15.8408	15.541	-0.0275691	0.9745	0.99965	NEUTRAL
XLOC_007768	RP11-484D2.4	11	43311962	43494933	1.38985	2.28884	0.719687	0.6916	0.99965	NEUTRAL
XLOC_007771	HSD17B12	11	43556435	43880726	42.5285	49.3421	0.214391	0.6643	0.99965	NEUTRAL
XLOC_007776	ALKBH3	11	43880810	43920944	11.6189	12.5256	0.108412	0.8838	0.99965	NEUTRAL
XLOC_007777	C11orf96	11	43921058	44001157	0.709193	0.402231	-0.818152	0.39295	0.99965	NEUTRAL
XLOC_007779	ACCS	11	44065924	44084222	2.53968	5.02656	0.984921	0.12155	0.99965	NEUTRAL
XLOC_007781	EXT2	11	44095548	44245429	89.2024	62.2852	-0.518193	0.34495	0.99965	NEUTRAL
XLOC_007788	PRDM11	11	45095805	45235292	1.93031	2.59181	0.42513	0.5579	0.99965	NEUTRAL
XLOC_007798	SLC35C1	11	45804071	45813015	10.1987	13.4865	0.403134	0.42135	0.99965	NEUTRAL
XLOC_007800	CRY2	11	45847117	45883248	3.33802	3.49544	0.0664784	0.90135	0.99965	NEUTRAL
XLOC_007801	MAPK8IP1	11	45885650	45906465	1.39513	0.802217	-0.798339	0.3791	0.99965	NEUTRAL
XLOC_007808	CREB3L1	11	46277660	46321422	37.4029	39.2807	0.0706715	0.88715	0.99965	NEUTRAL
XLOC_007809	DGKZ	11	46332904	46380554	7.56795	10.3932	0.457661	0.38305	0.99965	NEUTRAL
XLOC_007811	MDK	11	46380755	46383837	66.154	55.2707	-0.259313	0.6045	0.99965	NEUTRAL
XLOC_007812	ATG13	11	46602860	46674818	29.4901	27.935	-0.0781575	0.86395	0.99965	NEUTRAL
XLOC_007813	ZNF408	11	46700817	46705912	4.6859	5.94263	0.342778	0.551	0.99965	NEUTRAL
XLOC_007816	C11orf49	11	46936688	47177125	7.91958	8.80576	0.153024	0.86605	0.99965	NEUTRAL
XLOC_007817	DDB2	11	47214464	47239240	26.4791	20.1067	-0.397177	0.52485	0.99965	NEUTRAL
XLOC_007819	MADD	11	47269160	47330031	6.14537	4.47834	-0.456536	0.45315	0.99965	NEUTRAL
XLOC_007821	SLC39A13	11	47383147	47416501	71.8302	76.4527	0.0899784	0.8604	0.99965	NEUTRAL
XLOC_007822	NDUFS3,PTPMT1	11	47465943	47584562	38.0958	52.6032	0.465519	0.6126	0.99965	NEUTRAL
XLOC_007823	RP11-76I23.7	11	47465943	47584562	2.838	2.32608	-0.286973	0.898	0.99965	NEUTRAL
XLOC_007827	PTPRJ	11	47980557	48170841	6.97457	4.60561	-0.598713	0.2092	0.99965	NEUTRAL
XLOC_007968	CLP1	11	57638023	57661868	6.76262	6.14176	-0.13893	0.82935	0.99965	NEUTRAL
XLOC_007970	ZDHHC5	11	57667746	57701187	20.0893	22.1804	0.142858	0.7755	0.99965	NEUTRAL
XLOC_007971	C11orf31,CTNND1,RP11-691N7.6,TMX2,TMX2-CTNND1	11	57712599	57819546	93.5544	111.141	0.248513	0.71075	0.99965	NEUTRAL
XLOC_007979	CNTF,ZFP91,ZFP91-CNTF	11	58579110	58625733	24.0504	16.6883	-0.527229	0.29605	0.99965	NEUTRAL
XLOC_007988	FAM111A	11	59130132	59155039	9.74075	6.18487	-0.655289	0.26345	0.99965	NEUTRAL
XLOC_008002	STX3	11	59712822	59802706	4.81081	7.04781	0.550895	0.37755	0.99965	NEUTRAL
XLOC_008023	CCDC86	11	60835995	60855971	8.92899	9.30184	0.059019	0.9171	0.99965	NEUTRAL
XLOC_008026	TMEM109	11	60913165	60952530	54.7117	55.9698	0.0327978	0.96	0.99965	NEUTRAL
XLOC_008027	TMEM132A	11	60913165	60952530	16.9228	8.85492	-0.934413	0.3399	0.99965	NEUTRAL
XLOC_008033	DAK	11	61299450	61369509	11.749	17.1541	0.546012	0.54695	0.99965	NEUTRAL
XLOC_008034	TMEM138	11	61299450	61369509	14.8865	25.1393	0.755943	0.5121	0.99965	NEUTRAL
XLOC_008035	TMEM216	11	61391686	61398863	3.85147	4.91332	0.351289	0.6683	0.99965	NEUTRAL
XLOC_008036	PPP1R32,RP11-286N22.8,SDHAF2	11	61402640	61490931	32.339	39.4556	0.286952	0.8	0.99965	NEUTRAL
XLOC_008042	RPLP0P2	11	61615035	61639449	1.69739	1.28539	-0.401112	0.7428	0.99965	NEUTRAL
XLOC_008043	DAGLA	11	61680432	61867354	1.25436	0.932089	-0.428416	0.819	0.99965	NEUTRAL
XLOC_008050	INCENP	11	62123972	62153163	3.20835	2.99949	-0.0971182	0.9132	0.99965	NEUTRAL
XLOC_008064	ROM1	11	62602217	62615120	4.40546	3.83075	-0.201664	0.90455	0.99965	NEUTRAL
XLOC_008066	UQCC3	11	62646847	62673687	4.01028	4.36177	0.12121	0.91215	0.99965	NEUTRAL
XLOC_008068	TTC9C	11	62728068	62740293	9.97696	9.75017	-0.0331732	0.9609	0.99965	NEUTRAL
XLOC_008069	POLR2G	11	62761543	62766710	51.8043	66.9451	0.369908	0.4629	0.99965	NEUTRAL
XLOC_008070	TAF6L,TMEM179B	11	62771119	62792021	29.383	33.888	0.205793	0.72145	0.99965	NEUTRAL
XLOC_008072	SLC3A2	11	62856101	62888875	101.917	142.085	0.479354	0.3196	0.99965	NEUTRAL
XLOC_008080	RARRES3	11	63536808	63546462	2.17225	4.32714	0.994224	0.27915	0.99965	NEUTRAL
XLOC_008084	RTN3	11	63681445	63759891	71.8132	66.1308	-0.118926	0.8195	0.99965	NEUTRAL
XLOC_008085	C11orf84	11	63813387	63827718	5.57991	6.1913	0.150001	0.81	0.99965	NEUTRAL
XLOC_008086	MARK2	11	63838927	63911019	6.00568	5.72687	-0.0685804	0.90655	0.99965	NEUTRAL
XLOC_008087	NAA40	11	63938958	63957328	3.59792	4.44563	0.305224	0.58635	0.99965	NEUTRAL
XLOC_008089	AP000721.4,COX8A,OTUB1	11	63974606	64166106	210.493	249.78	0.246887	0.68135	0.99965	NEUTRAL
XLOC_008093	STIP1	11	64185271	64204543	46.0247	42.0265	-0.131108	0.78175	0.99965	NEUTRAL
XLOC_008095	DNAJC4,NUDT22	11	64206677	64234352	33.0206	39.5668	0.260925	0.6608	0.99965	NEUTRAL
XLOC_008096	VEGFB	11	64234537	64238793	66.0097	66.3003	0.00633782	0.98835	0.99965	NEUTRAL
XLOC_008097	FKBP2	11	64241002	64244132	39.0159	37.0436	-0.0748346	0.89255	0.99965	NEUTRAL
XLOC_008098	RP11-783K16.5	11	64244479	64249494	6.56852	3.73409	-0.814813	0.78695	0.99965	NEUTRAL
XLOC_008099	PLCB3	11	64251522	64269150	4.36892	4.98081	0.189103	0.73275	0.99965	NEUTRAL
XLOC_008100	GPR137	11	64269829	64289500	19.7368	20.5236	0.0563943	0.9265	0.99965	NEUTRAL
XLOC_008103	ESRRA	11	64305571	64318084	6.78119	7.02668	0.0513045	0.95245	0.99965	NEUTRAL
XLOC_008104	PRDX5	11	64318087	64321811	149.191	144.324	-0.0478429	0.9256	0.99965	NEUTRAL
XLOC_008106	RPS6KA4	11	64359147	64372215	8.83327	9.49418	0.104096	0.84715	0.99965	NEUTRAL
XLOC_008117	PPP2R5B	11	64917552	64935888	10.3774	9.91561	-0.0656743	0.90205	0.99965	NEUTRAL
XLOC_008119	ARL2,ARL2-SNX15,SNX15	11	65014112	65040572	54.6706	64.3214	0.234532	0.6352	0.99965	NEUTRAL
XLOC_008121	SAC3D1	11	65040900	65058549	4.38674	5.23835	0.255963	0.7977	0.99965	NEUTRAL
XLOC_008122	ZFPL1	11	65084222	65116384	8.1087	10.8194	0.416079	0.78525	0.99965	NEUTRAL
XLOC_008123	TM7SF2,VPS51	11	65084222	65116384	31.0327	46.546	0.58487	0.4517	0.99965	NEUTRAL
XLOC_008126	MRPL49	11	65120627	65134533	19.6537	19.5076	-0.0107653	0.99425	0.99965	NEUTRAL
XLOC_008129	CAPN1	11	65177605	65212006	35.0044	38.2657	0.128518	0.7906	0.99965	NEUTRAL
XLOC_008131	POLA2	11	65261761	65305589	3.669	3.36484	-0.124852	0.85585	0.99965	NEUTRAL
XLOC_008133	CDC42EP2	11	65314817	65322429	9.00922	7.41217	-0.281506	0.60795	0.99965	NEUTRAL
XLOC_008134	DPF2	11	65333753	65353249	21.6621	18.8038	-0.204152	0.6963	0.99965	NEUTRAL
XLOC_008137	FRMD8	11	65386598	65413525	5.6776	5.58154	-0.0246178	0.9612	0.99965	NEUTRAL
XLOC_008138	NEAT1,mascRNA-menRNA	11	65422773	65445598	52.8984	62.2439	0.234708	0.7956	0.99965	NEUTRAL
XLOC_008139	CMB9-22P13.1	11	65455257	65466720	0.889619	0.493589	-0.849877	0.48995	0.99965	NEUTRAL
XLOC_008140	MALAT1	11	65497761	65506516	67.3708	60.1635	-0.163235	0.81175	0.99965	NEUTRAL
XLOC_008141	SCYL1	11	65525076	65558930	23.9186	30.2853	0.340485	0.75945	0.99965	NEUTRAL
XLOC_008143	FAM89B,SSSCA1	11	65570429	65574198	45.6965	50.0846	0.132282	0.8002	0.99965	NEUTRAL
XLOC_008144	EHBP1L1,SIPA1	11	65576037	65650930	28.9409	26.4179	-0.131594	0.81785	0.99965	NEUTRAL
XLOC_008145	PCNXL3	11	65576037	65650930	5.90321	6.29245	0.0921235	0.93205	0.99965	NEUTRAL
XLOC_008149	KAT5	11	65711995	65720947	11.1554	13.4034	0.264859	0.7612	0.99965	NEUTRAL
XLOC_008153	SNX32	11	65823021	65873592	1.49638	1.46929	-0.0263561	0.98675	0.99965	NEUTRAL
XLOC_008154	MUS81	11	65823021	65873592	10.176	13.3141	0.387778	0.6429	0.99965	NEUTRAL
XLOC_008156	CCDC85B	11	65890111	65891635	33.6609	33.7231	0.002662	0.99565	0.99965	NEUTRAL
XLOC_008157	DRAP1	11	65919256	65921561	154.101	115.616	-0.414537	0.41635	0.99965	NEUTRAL
XLOC_008159	SART1	11	65961688	65979828	40.325	40.5687	0.00869324	0.9916	0.99965	NEUTRAL
XLOC_008160	BANF1	11	65996544	66004149	62.5364	60.5207	-0.0472679	0.9401	0.99965	NEUTRAL
XLOC_008162	SF3B2	11	66050728	66069619	54.8502	54.7973	-0.00139213	0.99755	0.99965	NEUTRAL
XLOC_008163	PACS1	11	66070362	66244747	27.2454	27.2868	0.00218859	0.9963	0.99965	NEUTRAL
XLOC_008164	KLC2	11	66257293	66268129	14.9631	14.3184	-0.0635415	0.9013	0.99965	NEUTRAL
XLOC_008166	RAB1B	11	66268532	66289170	58.7317	58.582	-0.00368043	0.99585	0.99965	NEUTRAL
XLOC_008170	RP11-867G23.12	11	66330241	66345125	1.44833	1.28172	-0.176305	0.88145	0.99965	NEUTRAL
XLOC_008179	PELI3	11	66435074	66546238	1.87254	3.41355	0.866277	0.6396	0.99965	NEUTRAL
XLOC_008180	BBS1,CTD-3074O7.11,DPP3	11	66435074	66546238	25.063	32.1516	0.35933	0.5212	0.99965	NEUTRAL
XLOC_008182	CCS	11	66590175	66606019	10.5703	12.7054	0.26543	0.68825	0.99965	NEUTRAL
XLOC_008183	RBM14,RBM14-RBM4,RBM4	11	66616581	66677921	42.5802	49.9143	0.229272	0.6897	0.99965	NEUTRAL
XLOC_008184	C11orf80,RCE1	11	66744450	66846546	7.78878	6.70379	-0.21642	0.72745	0.99965	NEUTRAL
XLOC_008185	LRFN4	11	66848232	66958376	7.98754	13.8912	0.798345	0.2702	0.99965	NEUTRAL
XLOC_008188	SYT12	11	67006777	67050863	2.36893	1.19196	-0.990894	0.16195	0.99965	NEUTRAL
XLOC_008189	RHOD	11	67056817	67072013	15.5352	26.8577	0.789799	0.1634	0.99965	NEUTRAL
XLOC_008190	KDM2A	11	67119268	67258087	19.502	16.2108	-0.266664	0.60375	0.99965	NEUTRAL
XLOC_008191	ADRBK1	11	67266409	67286556	14.4606	15.2235	0.0741756	0.87635	0.99965	NEUTRAL
XLOC_008192	ANKRD13D	11	67288546	67302485	13.9056	14.7468	0.084729	0.87205	0.99965	NEUTRAL
XLOC_008193	SSH3	11	67303447	67312607	5.25468	6.93316	0.399911	0.50265	0.99965	NEUTRAL
XLOC_008195	RAD9A	11	67317870	67425607	1.23412	1.2676	0.0386087	0.98155	0.99965	NEUTRAL
XLOC_008201	RPS6KB2	11	67428459	67435408	12.9157	16.6701	0.368133	0.49615	0.99965	NEUTRAL
XLOC_008203	AIP	11	67483040	67491103	26.7121	29.5236	0.144375	0.7764	0.99965	NEUTRAL
XLOC_008205	GSTP1	11	67583594	67586660	150.456	194.38	0.369538	0.47665	0.99965	NEUTRAL
XLOC_008207	NDUFV1	11	67606851	67612535	44.3769	60.031	0.435897	0.34755	0.99965	NEUTRAL
XLOC_008216	NDUFS8	11	68030616	68036644	56.5155	77.1631	0.449264	0.3497	0.99965	NEUTRAL
XLOC_008217	TCIRG1	11	68039015	68121444	33.3654	37.8871	0.183352	0.722	0.99965	NEUTRAL
XLOC_008220	LRP5	11	68312608	68449275	26.0427	22.2897	-0.224501	0.6801	0.99965	NEUTRAL
XLOC_008221	PPP6R3	11	68460730	68616711	13.0425	10.3684	-0.33103	0.53345	0.99965	NEUTRAL
XLOC_008225	IGHMBP2	11	68903841	68940602	6.94588	7.5296	0.116415	0.8634	0.99965	NEUTRAL
XLOC_008228	TPCN2	11	69048896	69090604	3.12204	3.5418	0.181992	0.782	0.99965	NEUTRAL
XLOC_008232	MYEOV	11	69294137	69367726	3.59246	2.4045	-0.579234	0.5964	0.99965	NEUTRAL
XLOC_008237	CCND1	11	69641086	69675416	344.007	273.625	-0.33024	0.63075	0.99965	NEUTRAL
XLOC_008243	FADD	11	70203162	70207390	2.95103	4.43123	0.586489	0.5341	0.99965	NEUTRAL
XLOC_008244	PPFIA1	11	70270699	70436584	14.574	13.9118	-0.0670818	0.9523	0.99965	NEUTRAL
XLOC_008247	CTTN	11	70270699	70436584	114.523	119.559	0.0620831	0.90795	0.99965	NEUTRAL
XLOC_008253	NADSYN1	11	71453108	71524107	21.6897	19.4229	-0.159247	0.7565	0.99965	NEUTRAL
XLOC_008262	FAM86C1	11	71787509	71821548	1.61122	1.86766	0.213078	0.8049	0.99965	NEUTRAL
XLOC_008269	RNF121	11	71928700	71997597	13.6711	17.3354	0.342594	0.56225	0.99965	NEUTRAL
XLOC_008270	IL18BP	11	71998540	72112780	0.858879	0.724626	-0.245217	0.8331	0.99965	NEUTRAL
XLOC_008271	RP11-849H4.4	11	71998540	72112780	14.7304	10.6565	-0.467054	0.7367	0.99965	NEUTRAL
XLOC_008279	INPPL1	11	72223700	72245664	45.7804	57.6298	0.332084	0.54755	0.99965	NEUTRAL
XLOC_008292	ARAP1-AS1	11	72685068	72794168	10.4611	13.6864	0.387709	0.31765	0.99965	NEUTRAL
XLOC_008297	ATG16L2	11	72814307	73142261	4.99461	5.9941	0.26317	0.8192	0.99965	NEUTRAL
XLOC_008304	ARHGEF17	11	73307234	73369091	31.7155	36.0939	0.186568	0.7812	0.99965	NEUTRAL
XLOC_008305	RELT	11	73376263	73397474	2.05164	1.34558	-0.608551	0.4512	0.99965	NEUTRAL
XLOC_008313	RP11-707G14.1	11	73675637	73761137	13.8639	10.6164	-0.385036	0.76005	0.99965	NEUTRAL
XLOC_008314	MRPL48	11	73787315	73865133	10.8865	11.0183	0.0173633	0.9849	0.99965	NEUTRAL
XLOC_008315	PAAF1	11	73872666	73931124	8.28084	8.75181	0.0798043	0.93405	0.99965	NEUTRAL
XLOC_008318	PPME1	11	74012713	74324705	19.1615	20.1084	0.0695864	0.92175	0.99965	NEUTRAL
XLOC_008327	POLD3	11	74491711	74669117	4.48326	5.76773	0.363455	0.5477	0.99965	NEUTRAL
XLOC_008330	RNF169	11	74748867	74949200	2.56722	1.80133	-0.511142	0.44985	0.99965	NEUTRAL
XLOC_008333	SPCS2	11	74949246	74979031	59.0177	58.3875	-0.0154891	0.979	0.99965	NEUTRAL
XLOC_008334	NEU3	11	74988133	75018893	1.98768	2.25689	0.183256	0.782	0.99965	NEUTRAL
XLOC_008339	RPS3	11	75399485	75422280	1045.47	1294.78	0.308558	0.6736	0.99965	NEUTRAL
XLOC_008342	SERPINH1	11	75562055	75572783	200.971	302.192	0.588475	0.3219	0.99965	NEUTRAL
XLOC_008349	UVRAG	11	75758454	76143195	5.92984	6.9695	0.233063	0.72025	0.99965	NEUTRAL
XLOC_008353	RP11-111M22.2	11	76381312	76414619	0.76515	0.459373	-0.736077	0.59925	0.99965	NEUTRAL
XLOC_008356	C11orf30	11	76444922	76553025	2.9695	2.34611	-0.339948	0.58985	0.99965	NEUTRAL
XLOC_008360	TSKU	11	76782250	76798154	14.4071	16.9515	0.234635	0.645	0.99965	NEUTRAL
XLOC_008361	RP11-21L23.2	11	76800363	76804555	0.608647	0.334763	-0.862464	0.33315	0.99965	NEUTRAL
XLOC_008362	ACER3	11	76860866	77026797	3.70316	3.80484	0.0390785	0.9407	0.99965	NEUTRAL
XLOC_008365	CAPN5	11	77066931	77126155	9.98012	10.3651	0.0546008	0.9127	0.99965	NEUTRAL
XLOC_008370	AQP11	11	77514935	77637805	0.595643	0.530242	-0.167798	0.82335	0.99965	NEUTRAL
XLOC_008372	AAMDC	11	77821108	77994678	12.8679	18.4088	0.516626	0.60215	0.99965	NEUTRAL
XLOC_008374	RP11-7I15.3	11	78015714	78080219	0.81242	0.793297	-0.0343652	0.89835	0.99965	NEUTRAL
XLOC_008377	KCTD21-AS1	11	78139770	78214711	0.518818	0.877165	0.757621	0.54565	0.99965	NEUTRAL
XLOC_008378	USP35	11	78139770	78214711	4.50598	4.89371	0.119088	0.8716	0.99965	NEUTRAL
XLOC_008398	RAB30-AS1	11	83072065	83106961	0.684074	0.465718	-0.554694	0.6161	0.99965	NEUTRAL
XLOC_008401	PCF11	11	83156987	83423516	12.8374	10.7352	-0.257993	0.83305	0.99965	NEUTRAL
XLOC_008402	ANKRD42	11	83156987	83423516	4.52381	6.06398	0.422727	0.70295	0.99965	NEUTRAL
XLOC_008415	TMEM126B	11	85628572	85636539	23.5165	20.0152	-0.232578	0.67875	0.99965	NEUTRAL
XLOC_008416	TMEM126A	11	85647966	85656547	16.2267	18.0478	0.153453	0.81185	0.99965	NEUTRAL
XLOC_008422	EED	11	86244543	86278813	7.82216	6.67509	-0.228778	0.70565	0.99965	NEUTRAL
XLOC_008425	C11orf73	11	86302210	86345931	20.3379	27.1129	0.414811	0.53085	0.99965	NEUTRAL
XLOC_008426	CCDC81	11	86374735	86423109	0.948957	0.853421	-0.153086	0.86455	0.99965	NEUTRAL
XLOC_008434	TMEM135	11	87037843	87324359	3.60337	3.83121	0.0884514	0.89905	0.99965	NEUTRAL
XLOC_008507	CEP295	11	93661638	93814695	1.69663	1.02954	-0.720666	0.63515	0.99965	NEUTRAL
XLOC_008509	SCARNA9,snoU2-30	11	93661638	93814695	1.35382	1.69295	0.322497	0.8758	0.99965	NEUTRAL
XLOC_008510	C11orf54	11	93661638	93814695	5.84843	5.04437	-0.213376	0.85905	0.99965	NEUTRAL
XLOC_008511	MED17	11	93661638	93814695	20.4892	13.3635	-0.616566	0.63435	0.99965	NEUTRAL
XLOC_008514	PANX1	11	94128927	94181972	14.0261	10.2409	-0.453779	0.3762	0.99965	NEUTRAL
XLOC_008517	ANKRD49	11	94415577	94499583	3.91226	2.92615	-0.418996	0.6004	0.99965	NEUTRAL
XLOC_008519	FUT4,PIWIL4	11	94543839	94925521	2.74439	2.21277	-0.310627	0.82775	0.99965	NEUTRAL
XLOC_008523	AMOTL1	11	94543839	94925521	12.7524	9.47095	-0.429184	0.42815	0.99965	NEUTRAL
XLOC_008525	KDM4D	11	94973680	94999518	0.465865	0.254376	-0.87295	0.3993	0.99965	NEUTRAL
XLOC_008533	SRSF8	11	95067196	95071224	9.77994	8.98502	-0.122304	0.8125	0.99965	NEUTRAL
XLOC_008534	ENDOD1	11	95089809	95132645	14.7931	22.4218	0.599982	0.2366	0.99965	NEUTRAL
XLOC_008539	RP11-338H14.1	11	95482405	95497553	0.627369	1.217	0.95594	0.50435	0.99965	NEUTRAL
XLOC_008541	CEP57	11	95768941	95832693	11.0803	7.84191	-0.498714	0.47455	0.99965	NEUTRAL
XLOC_008543	MIR1260B	11	95976597	96343180	204.359	145.924	-0.48589	0.8	0.99965	NEUTRAL
XLOC_008544	JRKL	11	96389988	96507574	4.94912	4.5352	-0.126006	0.8203	0.99965	NEUTRAL
XLOC_008553	ARHGAP42	11	100684161	100991937	1.13118	0.98583	-0.198416	0.77505	0.99965	NEUTRAL
XLOC_008556	TMEM133	11	100991988	100993941	0.945668	0.868652	-0.122555	0.8984	0.99965	NEUTRAL
XLOC_008559	CEP126	11	101890673	102001058	1.10544	1.06957	-0.047588	0.9493	0.99965	NEUTRAL
XLOC_008560	C11orf70	11	102047442	102084560	1.2284	1.42384	0.213005	0.83545	0.99965	NEUTRAL
XLOC_008563	YAP1	11	102110460	102233423	53.3792	50.3174	-0.0852193	0.89475	0.99965	NEUTRAL
XLOC_008568	BIRC2	11	102347210	102378670	22.0373	17.7814	-0.309573	0.52615	0.99965	NEUTRAL
XLOC_008576	DYNC2H1	11	103109430	103479863	2.73685	3.45439	0.335916	0.6722	0.99965	NEUTRAL
XLOC_008584	AASDHPPT	11	106051097	106101975	18.298	15.8117	-0.210688	0.74005	0.99965	NEUTRAL
XLOC_008592	CUL5	11	108008732	108147776	8.60459	6.53394	-0.397155	0.5181	0.99965	NEUTRAL
XLOC_008594	ACAT1	11	108008732	108147776	9.38556	11.426	0.2838	0.7302	0.99965	NEUTRAL
XLOC_008595	ATM	11	108157214	108467531	6.91959	6.38519	-0.115956	0.87425	0.99965	NEUTRAL
XLOC_008596	DDX10	11	108665024	108940930	8.35992	6.53608	-0.355064	0.5601	0.99965	NEUTRAL
XLOC_008599	C11orf87	11	109355084	109583907	1.87673	1.73255	-0.115326	0.8507	0.99965	NEUTRAL
XLOC_008602	ZC3H12C	11	110093360	110171841	3.10003	2.17478	-0.511416	0.33645	0.99965	NEUTRAL
XLOC_008604	FDX1	11	110429882	110464881	3.76621	4.35973	0.211125	0.7183	0.99965	NEUTRAL
XLOC_008613	LAYN	11	111540279	111561745	39.4614	55.3377	0.487821	0.3451	0.99965	NEUTRAL
XLOC_008614	SIK2	11	111602390	111766427	6.42262	7.34126	0.192865	0.7361	0.99965	NEUTRAL
XLOC_008617	C11orf1	11	111782194	111885975	10.6723	11.0703	0.0528225	0.962	0.99965	NEUTRAL
XLOC_008618	C11orf52,HSPB2,HSPB2-C11orf52	11	111908564	111926872	7.5016	10.1725	0.439399	0.8106	0.99965	NEUTRAL
XLOC_008619	DIXDC1	11	111927143	112022584	8.20852	15.1296	0.882181	0.07045	0.99965	NEUTRAL
XLOC_008622	DLAT	11	112024813	112224699	9.72823	10.7201	0.14007	0.90855	0.99965	NEUTRAL
XLOC_008623	C11orf57	11	112024813	112224699	7.7559	7.48001	-0.0522549	0.9643	0.99965	NEUTRAL
XLOC_008624	AP002884.2,BCO2,SDHD,TEX12	11	112024813	112224699	43.7934	47.7457	0.124658	0.8776	0.99965	NEUTRAL
XLOC_008627	PTS	11	112226364	112269955	29.8904	36.5104	0.288624	0.5975	0.99965	NEUTRAL
XLOC_008630	RP11-356J5.12	11	112270748	112362534	6.91355	4.30374	-0.683838	0.43595	0.99965	NEUTRAL
XLOC_008635	TTC12	11	113314528	113383544	2.57233	3.33293	0.373715	0.5746	0.99965	NEUTRAL
XLOC_008649	RBM7,REXO2,RP11-212D19.4	11	114391442	114450279	76.2303	64.9288	-0.231506	0.653	0.99965	NEUTRAL
XLOC_008671	PAFAH1B2	11	117144266	117176894	31.5122	24.894	-0.34011	0.4995	0.99965	NEUTRAL
XLOC_008672	SIDT2	11	117178732	117197445	41.9788	37.4027	-0.166517	0.75125	0.99965	NEUTRAL
XLOC_008673	TAGLN	11	117199320	117232525	2888.24	4502.52	0.640542	0.6482	0.99965	NEUTRAL
XLOC_008674	AP000892.6	11	117199320	117232525	47.1777	60.9406	0.3693	0.87055	0.99965	NEUTRAL
XLOC_008675	RNF214	11	117232624	117413268	5.37199	7.41002	0.464019	0.7702	0.99965	NEUTRAL
XLOC_008677	BACE1-AS	11	117232624	117413268	1.93763	2.12547	0.133489	0.95365	0.99965	NEUTRAL
XLOC_008678	CEP164	11	117232624	117413268	5.95742	4.5317	-0.394633	0.70965	0.99965	NEUTRAL
XLOC_008689	UBE4A	11	118359584	118431496	6.08256	5.44998	-0.158427	0.89475	0.99965	NEUTRAL
XLOC_008690	ATP5L	11	118359584	118431496	116.372	115.098	-0.0158815	0.98505	0.99965	NEUTRAL
XLOC_008692	KMT2A	11	118436489	118603033	8.44096	6.20153	-0.444784	0.65285	0.99965	NEUTRAL
XLOC_008693	TMEM25,TTC36	11	118436489	118603033	3.42734	2.51057	-0.449074	0.6655	0.99965	NEUTRAL
XLOC_008695	ARCN1	11	118436489	118603033	88.0895	71.9136	-0.292705	0.6702	0.99965	NEUTRAL
XLOC_008697	PHLDB1	11	118606439	118679690	26.5497	27.5085	0.0511828	0.9184	0.99965	NEUTRAL
XLOC_008711	CCDC84	11	118998141	119030906	3.13396	2.32156	-0.43289	0.68635	0.99965	NEUTRAL
XLOC_008712	TRAPPC4	11	118998141	119030906	40.6843	42.455	0.0614633	0.95405	0.99965	NEUTRAL
XLOC_008714	VPS11	11	119067373	119081978	11.9781	14.7595	0.30125	0.547	0.99965	NEUTRAL
XLOC_008715	HMBS	11	119084865	119093549	9.73684	13.6449	0.486841	0.3736	0.99965	NEUTRAL
XLOC_008717	C2CD2L	11	119096502	119118544	5.66225	3.68428	-0.619991	0.58895	0.99965	NEUTRAL
[truncated: 10,184 more rows]

## Sheet: Expressed only 1
Cuffmerge Gene ID	Gene Name	Chromosome	Gene Start (bp)	Gene End (bp)	FPKM 1	P_value	Q_value
XLOC_000112	CAMTA1-IT1	1	6785323	7769706	0.424195	0.22895	0.99965
XLOC_001146	RP4-549L20.3	1	100872371	100895998	0.481811	0.19205	0.99965
XLOC_001195	RP11-20O24.1	1	108970213	109042113	0.471053	0.2362	0.99965
XLOC_001335	U2	1	120489624	120579190	4.81374	0.2318	0.99965
XLOC_002071	RPL34P6	1	200863807	200864152	0.471263	0.07955	0.99965
XLOC_002121	SNORA77	1	203626560	203744081	15.4558	0.15755	0.99965
XLOC_002323	RP11-396C23.3	1	226127177	226127346	1.99589	0.1211	0.99965
XLOC_002764	NPPB	1	11857463	11858931	2.56026	5e-05	0.0106919
XLOC_002950	RP3-465N24.5	1	25242236	25430192	0.432544	0.1543	0.99965
XLOC_003359	AL353898.1	1	54053586	54112519	0.452125	0.2196	0.99965
XLOC_003535	RP11-386I14.4	1	77979174	78138449	3.34378	0.1125	0.99965
XLOC_004353	GCSHP5	1	167916728	168075843	0.830602	0.11715	0.99965
XLOC_004488	Metazoa_SRP	1	182573633	182589256	0.806018	0.2276	0.99965
XLOC_004526	GS1-174L6.4	1	185734550	186190949	0.451252	0.2178	0.99965
XLOC_004579	RP11-553K8.5	1	198638670	198757283	1.35149	0.1435	0.99965
XLOC_005375	RP11-324I22.3	10	35098005	35212958	0.748306	0.229	0.99965
XLOC_006726	RN7SL220P	10	67921898	68075348	0.626514	0.2056	0.99965
XLOC_006804	RP11-574K11.27	10	73740537	73740823	0.697064	0.07955	0.99965
XLOC_007101	RN7SL524P	10	103967200	104029233	0.940474	0.2013	0.99965
XLOC_007134	RP11-214N15.5	10	112446997	112818744	0.537789	0.20855	0.99965
XLOC_007181	AL355598.1,SNORA19	10	119029715	119080823	12.5386	0.15315	0.99965
XLOC_007333	AP006621.6	11	777577	784297	0.708401	0.22705	0.99965
XLOC_007605	AC084117.3	11	18394387	18408425	0.798731	0.11425	0.99965
XLOC_008233	RP11-211G23.2	11	69371462	69372511	0.617753	0.0527	0.99965
XLOC_009127	CTD-2003C8.2	11	10809296	10906802	0.478203	0.21345	0.99965
XLOC_009759	RP5-901A4.1	11	68008577	68030461	0.589804	0.19535	0.99965
XLOC_009788	ANO1-AS1	11	70078301	70189528	0.792072	0.14255	0.99965
XLOC_009827	RP11-800A3.2	11	73214997	73215913	0.430367	0.1211	0.99965
XLOC_010271	RP11-110I1.5	11	118998141	119030906	2.55019	0.10475	0.99965
XLOC_010276	RP11-110I1.13	11	119067373	119081978	1.05967	0.2065	0.99965
XLOC_010359	RP11-677M14.5	11	124766497	124834487	0.599136	0.22435	0.99965
XLOC_010500	RP11-1038A11.3	12	5290479	5383653	0.460308	0.10775	0.99965
XLOC_010891	RP5-1057I20.2	12	47706084	47837898	0.476585	0.18205	0.99965
XLOC_011998	A2ML1-AS1	12	8681599	8887001	0.443126	0.21935	0.99965
XLOC_012376	SNORA2A	12	48653400	48682238	8.0742	0.2312	0.99965
XLOC_012668	RP11-366L20.3	12	65758019	65966295	0.586658	0.1897	0.99965
XLOC_013169	RP11-972P1.10	12	123457640	123533718	0.550465	0.2436	0.99965
XLOC_013180	RP11-214K3.22	12	123762187	124316024	0.426249	0.1568	0.99965
XLOC_013184	RP11-214K3.18	12	123762187	124316024	0.447612	0.1678	0.99965
XLOC_013596	DLEU2_6	13	49982551	50849905	7.62499	0.2359	0.99965
XLOC_013869	AL442127.1	13	106541672	106568164	34.1384	0.2041	0.99965
XLOC_013934	RP11-230F18.6	13	113490994	113554590	0.838309	0.10365	0.99965
XLOC_014506	FARP1-AS1	13	98142561	98578830	0.536495	0.1765	0.99965
XLOC_014570	RP11-381O6.1	13	107163509	107866735	0.563257	0.2058	0.99965
XLOC_015503	AL162151.3	14	98973313	98973471	2.84231	0.1211	0.99965
XLOC_016415	RP11-471B22.2	14	90396501	90408261	0.626512	0.1553	0.99965
XLOC_016466	SCARNA13	14	95532296	95544724	0.764079	0.223	0.99965
XLOC_017046	RP11-521C20.3	15	40087889	40108892	1.28868	0.23905	0.99965
XLOC_017200	RP11-507J18.2	15	50702265	50765808	0.913228	0.194	0.99965
XLOC_017483	RN7SL510P	15	75843284	75901078	0.426279	0.22785	0.99965
XLOC_017864	RP11-1180F24.1	15	22690453	22691158	0.470253	0.01525	0.551618
XLOC_017974	RP11-1000B6.8	15	32519847	32639949	0.472806	0.16085	0.99965
XLOC_018579	RNU1-77P	15	82130229	82262763	2.4789	0.2433	0.99965
XLOC_018646	NTRK3	15	87859750	88271066	0.791179	5e-05	0.0106919
XLOC_018680	RP11-697E2.10	15	90249529	90314499	1.35572	0.1846	0.99965
XLOC_018772	RNU6-322P	15	100551819	100551922	117.441	0.1211	0.99965
XLOC_018779	RP11-66B24.9	15	100849560	101086066	0.81071	0.1452	0.99965
XLOC_019759	RP11-432I5.6	16	71623707	71724701	0.70386	0.20975	0.99965
XLOC_019879	RN7SL134P	16	82626802	83807834	0.615203	0.2029	0.99965
XLOC_020064	LA16c-429E7.1	16	1795619	1884294	0.705841	0.2251	0.99965
XLOC_020826	RP11-95H3.1	16	65141755	65176713	0.43868	0.04745	0.99965
XLOC_021426	FAM106CP	17	16689536	16816540	0.495538	0.2209	0.99965
XLOC_021521	AC004702.2	17	20009343	20403557	1.07435	0.2356	0.99965
XLOC_021618	RPS12P28	17	28648355	28702684	0.485637	0.14735	0.99965
XLOC_022244	RP11-87N3.6	17	64499615	64662068	0.471053	0.138	0.99965
XLOC_022399	SNORD1B	17	76557765	76586956	1602.3	0.17705	0.99965
XLOC_022680	CTD-2545G14.4	17	7189889	7225273	3.29467	0.15475	0.99965
XLOC_022681	MIR324	17	7189889	7225273	45.8881	0.1602	0.99965
XLOC_022693	RP11-104H15.8	17	7420102	7457707	0.770845	0.22885	0.99965
XLOC_022769	RP11-597M12.1	17	12665889	12991643	0.498871	0.2129	0.99965
XLOC_023058	RNA5SP437	17	31937017	32001045	11.7161	0.2213	0.99965
XLOC_023140	CCL3	17	36072865	36090169	1.27348	0.00025	0.0363525
XLOC_023330	RP11-242D8.3	17	43164182	43170403	1.01394	0.226	0.99965
XLOC_023444	RP11-6N17.3	17	47896149	47941410	0.748304	0.2276	0.99965
XLOC_023729	MIR635	17	68259181	68763882	428.999	0.11365	0.99965
XLOC_023794	RP11-649A18.5	17	75135247	75182983	0.541597	0.1441	0.99965
XLOC_024742	RP11-13N13.5	18	21650896	21704805	0.495967	0.2298	0.99965
XLOC_024751	RP11-627G18.2	18	22169442	22205229	1.31193	0.16195	0.99965
XLOC_025098	Metazoa_SRP	18	76822606	76970727	0.836498	0.23265	0.99965
XLOC_025878	CTB-102L5.8	19	37907227	38208372	0.476471	0.20325	0.99965
XLOC_025939	Metazoa_SRP	19	40447788	40465840	0.456763	0.2382	0.99965
XLOC_026097	PLA2G4C-AS1	19	48047842	48110817	0.439993	0.1488	0.99965
XLOC_026815	CTD-2189E23.2	19	14254188	14293205	2.32366	0.2111	0.99965
XLOC_026943	CTC-412M14.6	19	19699202	19699409	0.864102	0.1211	0.99965
XLOC_027350	CTB-171A8.1	19	44537057	44718759	0.43294	0.1442	0.99965
XLOC_027384	AC006262.4	19	46101121	46203083	0.444624	0.0477	0.99965
XLOC_027392	AC007193.8	19	46346993	46392981	1.24037	0.21805	0.99965
XLOC_029999	AC020594.5	2	33436323	33564750	0.490262	0.17295	0.99965
XLOC_030258	RP11-420C9.1	2	65203570	65203813	0.525394	0.1211	0.99965
XLOC_030298	RP11-401N16.1	2	69829641	69881396	0.46162	0.2432	0.99965
XLOC_030603	HMGN2P22	2	100591149	100591324	3.38147	0.07955	0.99965
XLOC_030656	AC009963.3	2	107902996	107903134	6.8265	0.1211	0.99965
XLOC_030708	IL1A	2	112773914	112784590	0.776773	5e-05	0.0106919
XLOC_030709	IL1B	2	112829750	112836903	15.8789	5e-05	0.0106919
XLOC_031904	CTD-2514C3.1	20	26018831	26020684	0.451252	0.07955	0.99965
XLOC_031990	AL121753.1	20	35214588	35214689	148.372	0.1211	0.99965
XLOC_032632	MLLT10P1	20	30403122	30403384	0.430367	0.1211	0.99965
XLOC_032835	WFDC3	20	45747943	45791932	0.560775	0.0001	0.0191329
XLOC_032991	WI2-87327B8.2	20	62596731	62603115	0.552204	0.01525	0.551618
XLOC_033021	RP4-583P15.16	20	63657809	63743505	0.600325	0.172	0.99965
XLOC_033168	AP000473.5	21	16630826	16640683	0.752075	0.0062	0.323133
XLOC_033239	LINC00161	21	28439345	28674848	0.480063	0.1365	0.99965
XLOC_033865	Metazoa_SRP	21	46324121	46445769	0.900488	0.2214	0.99965
XLOC_033964	Metazoa_SRP	22	20070715	20070965	0.486234	0.1211	0.99965
XLOC_034241	RNU6-564P	22	30331987	30429053	104.888	0.19705	0.99965
XLOC_034357	AL031587.1	22	37943049	38041915	296.743	0.238	0.99965
XLOC_034403	MCHR1	22	40678749	40682814	0.782301	0.00035	0.0454406
XLOC_034941	RP3-508I15.10	22	38656635	38681820	0.519255	0.2295	0.99965
XLOC_035030	Z97055.1	22	43904595	43904681	1168.72	0.1211	0.99965
XLOC_035366	Metazoa_SRP	3	39161269	39161520	0.481074	0.1211	0.99965
XLOC_035447	RTP3	3	46497490	46500949	0.475507	0.00135	0.121928
XLOC_035593	RP11-80H18.4	3	58329964	58330118	3.29467	0.1211	0.99965
XLOC_035619	RP11-245J9.6	3	64004021	64024010	0.502843	0.19945	0.99965
XLOC_035646	AC096922.2	3	68688479	68688588	61.5215	0.1211	0.99965
XLOC_035789	LINC00973	3	98902423	99018562	0.636874	0.00195	0.157528
XLOC_035856	Metazoa_SRP	3	109293787	109316517	0.438832	0.11815	0.99965
XLOC_035869	TAGLN3	3	111998663	112013887	1.0175	5e-05	0.0106919
XLOC_036005	RP11-390G14.1	3	126571778	126655155	0.466764	0.2	0.99965
XLOC_036042	RN7SL752P	3	129555174	129606818	0.691706	0.11305	0.99965
XLOC_036858	ATP6V0E1P2	3	41194836	41962430	0.513913	0.1369	0.99965
XLOC_037113	RP11-245J9.5	3	64004021	64024010	0.664532	0.19655	0.99965
XLOC_037258	RNU6-26P	3	98714329	98901689	226.803	0.1269	0.99965
XLOC_037354	RP11-271C24.3	3	113716459	113746300	0.476491	0.1587	0.99965
XLOC_038118	SCARNA22	4	1871423	1982207	15.4554	0.24085	0.99965
XLOC_038134	HTT-AS1_2	4	3063470	3074514	1.69073	0.117	0.99965
XLOC_038665	AC112719.1	4	76011183	76112802	148.372	0.2224	0.99965
XLOC_038688	RP11-109G23.1	4	78768498	78768750	0.476015	0.1211	0.99965
XLOC_038930	RP11-384K6.4	4	118640672	118640858	1.29587	0.1211	0.99965
XLOC_039191	U3	4	158666678	158723396	0.716555	0.21805	0.99965
XLOC_039352	LINC01060	4	188400735	188681051	0.837736	0.00085	0.0846565
XLOC_039493	SNRPCP16	4	9051841	9052051	1.64481	0.07955	0.99965
XLOC_040278	RP11-371F15.3	4	138819953	139012646	0.976964	0.08665	0.99965
XLOC_040944	RP11-159F24.3	5	43483958	43525310	0.843002	0.2001	0.99965
XLOC_041200	RP11-168A11.4	5	79991310	80083654	0.576178	0.2302	0.99965
XLOC_041542	CTB-113I20.2	5	134005146	134005562	0.675746	0.03295	0.857712
XLOC_041588	AC106753.1	5	137814332	138051961	68.1198	0.24375	0.99965
XLOC_043069	SNORD63	5	138554881	138575444	8448.51	0.1374	0.99965
XLOC_043084	CTD-2062A1.2	5	139526430	139628433	0.430654	0.19125	0.99965
XLOC_043812	HCG9P5	6	29722774	29749049	0.657946	0.2374	0.99965
XLOC_044094	RN7SL811P	6	44209765	44210063	0.635736	0.07955	0.99965
XLOC_044506	RFPL4B,RP11-506B6.7	6	112108759	112351296	0.627429	0.10045	0.99965
XLOC_045171	RP5-874C20.6	6	28319659	28319852	2.23502	0.07955	0.99965
XLOC_045863	RP11-249L21.4	6	108848415	108974472	0.443196	0.23055	0.99965
XLOC_046504	AC079780.3	7	23480752	23480959	0.864102	0.1211	0.99965
XLOC_046891	RP11-458F8.2	7	66880707	66882981	0.456096	0.07955	0.99965
XLOC_047116	SNRPCP9	7	97885867	97886074	1.7282	0.07955	0.99965
XLOC_048323	RP11-792A8.3	7	66628880	66844826	0.544397	0.23645	0.99965
XLOC_048431	AC007000.11	7	76978616	77416400	8.07417	0.2162	0.99965
XLOC_048628	AC005086.2	7	101815903	102283957	0.696432	0.1847	0.99965
XLOC_049075	RP5-1142J19.2	7	157138912	157269372	0.849804	0.18695	0.99965
XLOC_049401	RNU5A-3P	8	30578317	30658251	38.0323	0.2354	0.99965
XLOC_050037	UBA52P5	8	123219956	123275541	0.809273	0.22695	0.99965
XLOC_050390	DEFB109P3	8	12115781	12178575	0.543991	0.2225	0.99965
XLOC_050445	AC100800.2	8	18527300	19084730	148.374	0.23775	0.99965
XLOC_050740	RP11-1070A24.1	8	53851807	53959303	1.12763	0.20845	0.99965
XLOC_050919	RP11-578O24.2	8	78666046	78805523	0.722913	0.2302	0.99965
XLOC_051010	RNU6-925P	8	89900720	89900824	104.865	0.1211	0.99965
XLOC_051082	SNORA72	8	97868839	98046469	9.66458	0.13175	0.99965
XLOC_051298	RNU4-25P,RP11-55J15.2	8	127794532	128101253	1.61298	0.2121	0.99965
XLOC_051688	RP11-156G14.6	9	35592785	35592951	2.18306	0.1211	0.99965
XLOC_052585	CDC37L1-AS1	9	4676599	4679502	1.15554	0.0664	0.99965
XLOC_053372	RP11-9M16.2	9	114396723	114398503	1.78361	0.1211	0.99965
XLOC_053457	RP11-65N13.6	9	125261793	125367207	0.507946	0.23915	0.99965
XLOC_058287	FKSG70	X	42252458	42699385	0.605976	0.04995	0.99965
XLOC_058589	RPSAP14	X	73944323	74293574	0.437317	0.23765	0.99965
XLOC_058598	FTX_3	X	73944323	74293574	4.39701	0.2191	0.99965
XLOC_058599	FTX_4	X	73944323	74293574	4.39701	0.233	0.99965
XLOC_059512	Metazoa_SRP	X	46553521	46553775	0.466185	0.1211	0.99965
XLOC_059713	IGBP1-AS2	X	70133448	70166324	0.486938	0.19605	0.99965
XLOC_059735	AL590762.10	X	71366238	71532374	0.471057	0.2326	0.99965
XLOC_060096	RP1-315G1.3	X	123959232	124963817	0.526582	0.21645	0.99965
XLOC_060126	Metazoa_SRP	X	129779978	129796963	0.659982	0.0874	0.99965
XLOC_060185	AL691477.1	X	134769565	134854610	2.32378	0.22855	0.99965

## Sheet: Expressed_only 2
Cuffmerge Gene ID	Gene Name	Chromosome	Gene Start (bp)	Gene End (bp)	FPKM 2	P_value	Q_value
XLOC_000014	MTND1P23	1	601435	724903	0.579758	0.10895	0.99965
XLOC_000180	RNU5E-1	1	11908151	11908271	16.7892	0.1186	0.99965
XLOC_000415	RP1-50O24.6	1	26876132	26890297	1.10594	0.2085	0.99965
XLOC_000464	RNU11	1	28648599	28648733	7.81381	0.09825	0.99965
XLOC_000884	RN7SL130P	1	63440769	63660245	0.834826	0.15315	0.99965
XLOC_000934	RP11-82L20.1	1	71081323	72282734	1.57225	0.1658	0.99965
XLOC_001008	RP11-82H13.2	1	84244333	84244577	0.459452	0.1186	0.99965
XLOC_001558	S100A9	1	153357853	153361027	1.19689	0.002	0.158054
XLOC_001684	RP11-740C1.2	1	159557367	159558200	0.824228	0.0017	0.141255
XLOC_002768	Y_RNA	1	12019465	12032045	30.2922	0.2417	0.99965
XLOC_002833	ANO7P1	1	16215908	16228027	0.628571	0.01895	0.639535
XLOC_003043	RP11-490K7.4	1	31259567	31296782	0.595918	0.21235	0.99965
XLOC_003133	RSPO1	1	37611349	37634923	0.551306	0.00015	0.0253622
XLOC_003172	RP1-39G22.4	1	40258106	40294184	0.529395	0.17185	0.99965
XLOC_003430	DLEU2_6	1	63440769	63660245	5.83327	0.174	0.99965
XLOC_003795	RP5-965F6.2	1	112177233	112360528	0.429372	0.03315	0.857712
XLOC_003944	U1	1	145465616	145465780	1.86061	0.1186	0.99965
XLOC_003983	RP11-495P10.7,RP11-495P10.8	1	148290889	148297556	1.09612	0.0023	0.173287
XLOC_004173	SNORA80E	1	155913042	155934400	11.0442	0.211	0.99965
XLOC_004174	SCARNA4	1	155913042	155934400	9.47579	0.22965	0.99965
XLOC_004312	UQCRBP2	1	162541331	162541628	0.587223	0.08375	0.99965
XLOC_004362	DPT	1	168695458	168729264	1.29393	0.0001	0.0191329
XLOC_004670	SNORA72	1	205712818	205750276	7.36365	0.15185	0.99965
XLOC_005106	IDI2-AS1	10	971145	1049170	0.475915	0.14565	0.99965
XLOC_005294	RP11-165A20.3	10	24953240	24953513	0.703028	0.08375	0.99965
XLOC_005843	RP11-236B18.2	10	90994619	91006390	0.745748	0.0327	0.857712
XLOC_006336	SNRPGP5	10	12896624	13138308	0.609962	0.17855	0.99965
XLOC_006375	RP11-406H21.2	10	17137335	17137585	0.432251	0.1186	0.99965
XLOC_006631	RP11-541M12.3	10	48446033	48656265	0.469254	0.22645	0.99965
XLOC_007601	SAA1	11	18266173	18269977	20.5401	5e-05	0.0106919
XLOC_008338	CTD-2562J17.9	11	75264181	75351705	0.64423	0.24195	0.99965
XLOC_008647	ZBTB16	11	114059592	114356571	10.497	0.12355	0.99965
XLOC_008666	APOC3	11	116829705	116833072	0.715232	0.02105	0.674203
XLOC_008716	AP003391.1	11	119093853	119095467	13.4913	0.21705	0.99965
XLOC_008956	RNU1-91P	11	3000921	3057613	1.91889	0.214	0.99965
XLOC_009020	HBB	11	5225463	5229395	2.58165	5e-05	0.0106919
XLOC_009639	RP11-21A7A.3	11	63974606	64166106	0.501158	0.1349	0.99965
XLOC_010081	MMP7	11	102520507	102530753	1.21757	5e-05	0.0106919
XLOC_011491	RNA5SP370	12	104117076	104138289	15.547	0.2394	0.99965
XLOC_011682	RP11-173P15.9	12	120703866	120704282	0.482671	0.05245	0.99965
XLOC_011832	SNORA49	12	131949919	132081102	29.1641	0.17855	0.99965
XLOC_013460	STARD13-AS	13	33103134	33350630	0.630319	5e-05	0.0106919
XLOC_013535	RP11-71C5.2	13	44432142	44580432	0.594117	0.1487	0.99965
XLOC_013584	SNRPGP14	13	49444373	49495003	0.61821	0.2411	0.99965
XLOC_014487	RNY3P8	13	95310829	95310955	10.8338	0.1186	0.99965
XLOC_014537	COX5BP6	13	100603926	100675093	0.692335	0.2366	0.99965
XLOC_014561	RP11-272L14.2	13	106489730	106535114	0.574717	0.17055	0.99965
XLOC_015768	AL355075.1,SNORA79	14	20311367	20333312	3.28161	0.2431	0.99965
XLOC_015804	SNORD8	14	21385193	21456126	40.0092	0.2015	0.99965
XLOC_016181	RP11-973N13.5	14	64388030	64546173	1.28141	0.1883	0.99965
XLOC_017062	RNU6-516P	15	40488040	40565057	74.2762	0.23145	0.99965
XLOC_017338	AC100830.5	15	64687572	64719602	0.480002	0.146	0.99965
XLOC_017346	RNU5A-1	15	65234459	65300618	116.409	0.2056	0.99965
XLOC_017565	UBE2Q2P6	15	82445718	82454837	0.583569	0.0253	0.753867
XLOC_018123	MIR1282	15	43726917	43803043	209.666	0.1122	0.99965
XLOC_018149	CTD-2651B20.6	15	45092649	45201175	0.545811	0.2305	0.99965
XLOC_018357	RP11-628M2.1	15	65226471	65226697	0.564435	0.1186	0.99965
XLOC_019038	RP11-165M1.2	16	11976736	12611044	0.480894	0.2145	0.99965
XLOC_019644	RP11-2K6.1	16	63314263	63618046	0.47946	0.12645	0.99965
XLOC_019857	RP11-303E16.5	16	81053496	81096403	0.576664	0.22275	0.99965
XLOC_020174	C16orf89	16	4882506	5097808	0.43543	0.0588	0.99965
XLOC_020795	SNORA76A	16	58515478	58629886	6.54209	0.2239	0.99965
XLOC_021179	RP11-676J12.9	17	795305	795794	0.881265	0.0128	0.492394
XLOC_021736	CCL13	17	34356451	34358610	4.30007	5e-05	0.0106919
XLOC_021742	RP5-837J1.6	17	34927858	35121522	0.472862	0.2006	0.99965
XLOC_021760	AC015849.13	17	35574794	35868891	0.473967	0.10665	0.99965
XLOC_022128	RP11-670E13.6	17	56914185	56914533	0.434085	0.08375	0.99965
XLOC_022204	RP11-51L5.4	17	62260633	62261936	0.64423	0.1186	0.99965
XLOC_022242	AC138744.2	17	64477784	64497036	0.739249	0.22655	0.99965
XLOC_022308	SNRPGP4	17	69147213	69327244	0.543959	0.22715	0.99965
XLOC_022390	Y_RNA	17	76309485	76387860	151.067	0.19265	0.99965
XLOC_022580	RP1-59D14.10	17	2054153	2381058	0.78434	0.1721	0.99965
XLOC_023040	CTD-2349P21.10	17	30709298	30824776	0.545811	0.2041	0.99965
XLOC_023125	MMP28	17	35574794	35868891	0.7235	0.1079	0.99965
XLOC_023447	RP11-6N17.10	17	47941505	47996196	0.447569	0.1893	0.99965
XLOC_024232	RP11-210K20.4	18	31829172	31953136	0.635373	0.2421	0.99965
XLOC_024690	RP11-756J15.3	18	13217497	13652755	0.55063	0.2264	0.99965
XLOC_024955	SNORA37	18	54151600	54224788	8.88081	0.23605	0.99965
XLOC_025593	AC005387.3	19	18531612	18544077	0.425362	0.15455	0.99965
XLOC_026233	CTD-3018O17.5	19	52388841	52397766	171.296	0.22095	0.99965
XLOC_026335	AC008746.5	19	54444812	54463711	0.627655	0.1446	0.99965
XLOC_026908	CTB-52I2.7	19	18001131	18014102	0.439193	0.2315	0.99965
XLOC_026986	VN1R84P	19	21719800	21720035	0.506901	0.1186	0.99965
XLOC_027749	RN7SL525P	19	58543298	58543578	0.997349	0.05245	0.99965
XLOC_027914	AC009228.1	2	24202863	24360714	1.00428	0.198	0.99965
XLOC_027970	RP11-373D23.2	2	28384408	28417312	0.591296	0.1143	0.99965
XLOC_028050	AC011247.3	2	38561977	38603586	0.518902	0.21805	0.99965
XLOC_028118	Metazoa_SRP	2	47345157	47387601	0.772303	0.08335	0.99965
XLOC_028598	IL1R2	2	101991843	102028544	0.619585	5e-05	0.0106919
XLOC_029337	RP11-544H14.1	2	202874781	203014798	0.702814	0.2118	0.99965
XLOC_029458	CXCR2	2	218125288	218137253	0.424775	0.00835	0.384232
XLOC_029613	SCARNA6	2	233210050	233295674	1.50432	0.2077	0.99965
XLOC_029786	EIF1P7	2	9206764	9423547	0.460071	0.17595	0.99965
XLOC_029801	SNORA80B	2	10439967	10448504	5.84878	0.15605	0.99965
XLOC_030042	RNU6-851P	2	38875961	38975449	53.8577	0.2214	0.99965
XLOC_030204	RP11-493E12.1	2	61065870	61164829	0.47285	0.1987	0.99965
XLOC_030508	AC018696.1	2	90359808	90360032	0.578894	0.1186	0.99965
XLOC_031309	AC007283.4	2	201116103	201176687	0.868902	0.20405	0.99965
XLOC_031978	ITCH-IT1	20	34363234	34511393	0.724444	0.21445	0.99965
XLOC_032030	LBP	20	38346355	38377023	0.560956	0.00015	0.0253622
XLOC_032275	MIR646HG	20	60087839	60527458	0.529219	0.00025	0.0363525
XLOC_032626	MIR663A,MIR663AHG	20	26186919	26251526	0.61261	5e-05	0.0106919
XLOC_032654	AL049539.1	20	32109505	32167258	151.067	0.194	0.99965
XLOC_032760	SNORA71D	20	38420587	38435353	6.53117	0.2341	0.99965
XLOC_033683	SNORA80A	21	32291812	32393026	17.4973	0.1935	0.99965
XLOC_033725	SRSF9P1	21	36295172	36295702	0.448754	0.03315	0.857712
XLOC_034138	KB-1572G7.4	22	23608451	23717356	0.702749	0.23115	0.99965
XLOC_034287	RP1-149A16.16	22	32386667	32386868	1.62166	0.08375	0.99965
XLOC_034706	BCRP8	22	23179703	23318037	0.82365	0.2178	0.99965
XLOC_034733	BCRP1	22	24251827	24265525	0.471539	0.23535	0.99965
XLOC_035584	ARF4-AS1	3	57571362	57600927	0.541213	0.1037	0.99965
XLOC_035831	Y_RNA	3	106688677	106688779	93.2147	0.1186	0.99965
XLOC_036259	RP11-379F4.6	3	158695366	158695581	1.30671	0.08375	0.99965
XLOC_036318	RP11-362K14.7	3	169793427	169812986	0.530451	0.18025	0.99965
XLOC_036362	LINC00578	3	177441920	177752305	0.438806	0.0153	0.552053
XLOC_036366	KCNMB2	3	178202049	178860405	0.49696	0.0007	0.072705
XLOC_036848	RNU5B-2P	3	40498890	40499003	90.8767	0.05245	0.99965
XLOC_037152	LINC00877	3	72035299	72279503	0.628822	0.0002	0.0319582
XLOC_037295	RP11-446H18.5	3	107240691	107421304	0.973501	0.0012	0.111141
XLOC_037524	SNORA58	3	131462211	131502983	5.52354	0.23195	0.99965
XLOC_037608	ATP1B3-AS1	3	141876123	141926514	0.759137	0.1363	0.99965
XLOC_037713	RP11-439C8.2	3	154969282	154970223	0.459742	0.03315	0.857712
XLOC_037759	IQCJ-SCHIP1-AS1	3	158962234	159897366	0.594098	0.17835	0.99965
XLOC_037893	RNA5SP149	3	180161885	180161977	671.914	0.08375	0.99965
XLOC_037988	GMNC	3	190852876	190892429	1.01242	5e-05	0.0106919
XLOC_038038	RNU2-11P	3	195928588	195928775	1.0515	0.1186	0.99965
XLOC_038045	AC069257.6	3	196211486	196338503	2.50359	0.2258	0.99965
XLOC_039429	RN7SL589P	4	2269581	2418663	0.538893	0.2235	0.99965
XLOC_039508	RNA5SP155	4	10074338	10116949	8.87196	0.12255	0.99965
XLOC_039579	PPARGC1A	4	23560922	23904089	0.445702	0.0002	0.0319582
XLOC_039758	RN7SKP30	4	55395956	55547889	0.701603	0.14405	0.99965
XLOC_039872	PF4	4	73981076	73982124	1.87528	0.0006	0.0671123
XLOC_040916	LINC00603	5	40052290	40053324	0.827218	0.00875	0.395136
XLOC_041519	RP11-89G4.1	5	132481608	132490798	0.755607	0.2264	0.99965
XLOC_041535	RP11-485M7.2	5	133051961	133106449	1.57001	0.18595	0.99965
XLOC_041608	AC011404.1,SNORA74A	5	138946719	139331677	1.70749	0.1359	0.99965
XLOC_041638	VTRNA1-2	5	140718924	140719013	1562.36	0.05245	0.99965
XLOC_041775	Metazoa_SRP	5	154818490	154876793	0.778851	0.20355	0.99965
XLOC_041895	SNORA74B	5	172983756	173035445	3.24333	0.12945	0.99965
XLOC_042365	C6	5	41142233	41261438	0.483838	0.00245	0.177241
XLOC_043044	VTRNA2-1	5	136080470	136080597	10.1233	0.1186	0.99965
XLOC_043127	AC005740.5	5	141943584	141990291	0.886436	0.17445	0.99965
XLOC_043524	RNA5SP202	6	4427962	4428081	54.5121	0.05245	0.99965
XLOC_043622	RP3-525L6.2	6	17759182	17987623	0.821814	0.1711	0.99965
XLOC_043690	HIST1H4C	6	26043226	26123926	0.900224	0.24015	0.99965
XLOC_043734	MCFD2P1	6	27407696	27407996	1.15066	0.03315	0.857712
XLOC_043750	Z98744.3	6	27890381	27893149	5.23559	0.12195	0.99965
XLOC_043757	U3	6	28015567	28015777	0.702746	0.1186	0.99965
XLOC_043946	RN7SL26P	6	33540045	33593338	0.549337	0.22085	0.99965
XLOC_044505	RP1-142L7.5	6	112108759	112351296	0.506829	0.15795	0.99965
XLOC_044710	HYMAI	6	143940299	144064599	0.980187	0.1945	0.99965
XLOC_044859	RNA5SP226	6	165327286	165989615	202.962	0.1452	0.99965
XLOC_044887	RP11-35J6.1	6	168820422	168820656	0.512746	0.1186	0.99965
XLOC_044928	AL031768.1	6	2245747	2482022	118.066	0.2365	0.99965
XLOC_045009	RNA5SP203	6	10747758	10979320	5.83243	0.2397	0.99965
XLOC_045034	AL050335.1	6	15149698	15149799	104.784	0.1186	0.99965
XLOC_045357	IP6K3	6	33721666	33746985	0.515445	5e-05	0.0106919
XLOC_045435	TREM2	6	41158505	41163186	0.521834	0.0007	0.072705
XLOC_045467	RP11-387M24.5	6	43037616	43075099	0.495969	0.1979	0.99965
XLOC_045883	AL357515.1	6	110969772	110969872	118.066	0.1186	0.99965
XLOC_046028	RP1-283K11.2	6	133240597	133895553	0.515985	0.22375	0.99965
XLOC_046299	RP11-417E7.1	6	169158091	169162924	0.427978	0.019	0.639535
XLOC_046300	RP11-417E7.2	6	169175303	169182740	0.43267	0.03315	0.857712
XLOC_046395	AC073343.1	7	6663973	6708901	1339.99	0.23865	0.99965
XLOC_046872	SNORA22	7	65751141	65763354	13.0629	0.243	0.99965
XLOC_047196	CTA-313A17.3	7	102337315	102339115	0.766011	0.03315	0.857712
XLOC_047248	snoU109	7	107579556	107629498	3.73242	0.21405	0.99965
XLOC_047391	RP11-775D22.2	7	130141730	130142615	0.463269	0.0387	0.925554
XLOC_047649	RNY4	7	148963314	148963410	973.18	0.02055	0.665518
XLOC_048140	SNORA5A	7	45100099	45112047	6.53124	0.20465	0.99965
XLOC_049253	SLC7A2	8	17497087	17570573	1.2067	5e-05	0.0106919
XLOC_049420	SNORD13	8	33370823	33513601	74.2863	0.22925	0.99965
XLOC_049584	AC100821.1	8	54046366	54102017	209.601	0.2184	0.99965
XLOC_049677	RNA5SP268	8	66964098	67343677	12.4565	0.2173	0.99965
XLOC_050089	RNU1-106P	8	127794532	128101253	1.86061	0.215	0.99965
XLOC_050327	ALG1L13P	8	8228594	8244865	0.454073	0.07675	0.99965
XLOC_050372	RP11-297N6.4	8	11795572	11839309	0.463372	0.1618	0.99965
XLOC_051061	AC024995.1	8	95204455	95810136	13.3878	0.22175	0.99965
XLOC_051389	RP13-582O9.7	8	143289675	143298061	0.586383	0.2185	0.99965
XLOC_051520	RN7SL5P	9	8314245	10612723	0.755607	0.1554	0.99965
XLOC_052046	RP11-305L7.6	9	91119061	91182762	0.567656	0.1117	0.99965
XLOC_052297	RP11-64P14.7	9	122609914	122639685	0.855019	0.03045	0.833848
XLOC_052394	RP11-247A12.1	9	129094809	129148946	0.949069	0.1665	0.99965
XLOC_053034	HSPB1P1	9	72007880	72008136	1.63184	0.03315	0.857712
XLOC_053154	ROR2	9	91563090	91950162	0.707261	5e-05	0.0106919
XLOC_053159	MIR3651,SNORA84	9	92210206	92293756	6.93983	0.1895	0.99965
XLOC_053473	SNORA65	9	127447673	127451405	8.32627	0.1368	0.99965
XLOC_053550	AL160165.1	9	132592996	132694955	1134.95	0.20485	0.99965
XLOC_058015	MT-TC,MT-TY	MT	5760	5891	9888.96	0.1057	0.99965
XLOC_058600	FTX_5	X	73944323	74293574	0.626668	0.2221	0.99965
XLOC_058897	RNY3P16	X	119456557	119456658	104.784	0.1186	0.99965
XLOC_059448	MID1IP1-AS1	X	38801431	38806537	0.759337	0.20285	0.99965
XLOC_059622	RP11-258C19.4	X	53093709	53167014	1.70401	0.2177	0.99965

## Sheet: P_Signicant
Cuffmerge Gene ID	Gene Name	Chromosome	Gene Start (bp)	Gene End (bp)	FPKM 1	FPKM 2	log2(fold_change)	P_value	Q_value	Regulation
XLOC_000306	CDA	1	20588947	20618908	0.354403	5.5679	3.97367	0.0375	0.908812	UP
XLOC_000318	ALPL	1	21509371	21578412	0.577487	8.84741	3.9374	0.0002	0.0319582	UP
XLOC_000382	MAN1C1	1	25617467	25786207	0.103802	0.639326	2.62272	0.01705	0.594542	UP
XLOC_000419	TRNP1	1	26993706	27000898	0.943029	9.83002	3.38182	0.00085	0.0846565	UP
XLOC_000791	PODN	1	53062051	53085502	0.907162	9.24019	3.34849	0.00055	0.0644964	UP
XLOC_000894	DNAJC6	1	65248218	65416006	1.4517	6.52401	2.16802	0.0036	0.227598	UP
XLOC_000895	LEPR,LEPROT	1	65420586	65641559	43.9468	128.693	1.55011	0.01345	0.510442	UP
XLOC_000980	PTGFR	1	78229598	78539749	1.47414	4.65211	1.65801	0.0133	0.507599	UP
XLOC_000981	IFI44L	1	78619921	78646145	0.314773	4.43858	3.81771	0.0018	0.147044	UP
XLOC_001082	FNBP1L	1	93448130	93554661	3.53464	7.66922	1.11752	0.03985	0.935784	UP
XLOC_001272	OLFML3	1	113979390	113982254	51.8014	213.416	2.04261	0.00025	0.0363525	UP
XLOC_001326	PHGDH	1	119659797	119744215	20.8539	43.4881	1.0603	0.02655	0.770327	UP
XLOC_001675	ACKR1,CADM3	1	159171608	159207973	0.156752	507.252	11.66	0.00215	0.165413	UP
XLOC_001689	DUSP23	1	159780931	159782543	11.6541	105.192	3.17411	5e-05	0.0106919	UP
XLOC_001842	FMO3	1	171090876	171117819	0.0226214	2.64359	6.86867	0.0156	0.560098	UP
XLOC_001844	FMO2	1	171185207	171227788	0.170339	2.24822	3.7223	0.0235	0.723969	UP
XLOC_002126	SOX13	1	204073114	204127743	0.922349	2.4812	1.42765	0.03825	0.922933	UP
XLOC_002280	MARC1	1	220786758	220819657	0.725105	4.22624	2.54311	0.01955	0.650518	UP
XLOC_002319	EPHX1	1	225810091	225882369	25.1634	64.4008	1.35575	0.02845	0.796824	UP
XLOC_002923	ID3	1	23557917	23559794	79.362	237.097	1.57895	0.0048	0.269486	UP
XLOC_002981	FAM46B	1	27005019	27012836	0.690703	6.37193	3.20559	0.00155	0.135774	UP
XLOC_003107	CLSPN	1	35720217	35769967	0.0329697	0.499795	3.92213	0.0389	0.925769	UP
XLOC_003112	COL8A2	1	36095235	36125220	13.2302	27.7413	1.0682	0.0355	0.890009	UP
XLOC_003218	SLC6A9	1	43991358	44115913	5.42203	16.7742	1.62934	0.0045	0.259661	UP
XLOC_003262	PIK3R3,RP11-322N21.2,RP4-533D7.6	1	46040139	46185958	0.915137	2.72575	1.57459	0.0409	0.949687	UP
XLOC_003379	PPAP2B	1	56494746	56645301	30.8642	155.625	2.33407	0.0003	0.0411538	UP
XLOC_003715	COL11A1	1	102876466	103108496	13.1177	91.1296	2.7964	0.00025	0.0363525	UP
XLOC_003746	SORT1	1	109309567	109397951	26.3989	85.5739	1.69669	0.0066	0.329796	UP
XLOC_003951	ITGA10	1	145891207	145910189	4.87322	16.439	1.75418	0.0043	0.25403	UP
XLOC_004054	SELENBP1	1	151364301	151372733	2.57184	10.4904	2.0282	0.00285	0.192753	UP
XLOC_004484	GLUL	1	182381703	182392206	33.7367	136.73	2.01893	0.00205	0.160264	UP
XLOC_004566	KCNT2	1	196225778	196609225	0.10274	0.836282	3.02499	0.00635	0.325124	UP
XLOC_004633	CHI3L1	1	203178930	203186749	117.258	305.392	1.38097	0.024	0.736234	UP
XLOC_004637	FMOD	1	203340627	203351489	0.725639	4.18932	2.52939	0.0024	0.176255	UP
XLOC_004701	PLXNA2	1	208022241	208244320	2.20181	5.57829	1.34113	0.01055	0.437059	UP
XLOC_004926	FAM89A	1	231018957	231040246	3.30014	13.8564	2.06995	0.00415	0.248334	UP
XLOC_005219	OLAH	10	15032226	15073852	0.02853	4.68406	7.35914	0.00995	0.42305	UP
XLOC_005488	PTPN20	10	46911395	47002488	0.311352	1.05454	1.76	0.01175	0.46555	UP
XLOC_005631	TSPAN15	10	69451472	69507669	0.428805	2.31958	2.43547	0.02855	0.796824	UP
XLOC_005648	UNC5B	10	71212569	71302864	9.90304	25.0932	1.34135	0.00875	0.395136	UP
XLOC_005755	PLAC9	10	80131681	80145359	7.57823	28.6622	1.91922	0.008	0.375252	UP
XLOC_006027	DUSP5	10	110497837	110511544	7.35056	18.8607	1.35945	0.01025	0.428291	UP
XLOC_006754	AIFM2	10	70052795	70132934	5.76657	14.0844	1.28831	0.0367	0.897547	UP
XLOC_006930	ACTA2	10	88879733	89015785	116.235	563.37	2.27704	0.0009	0.0878315	UP
XLOC_006947	ANKRD1	10	90912095	90921276	39.2184	84.2395	1.10297	0.0384	0.922933	UP
XLOC_006952	PPP1R3C	10	91628441	91633054	35.8876	83.9069	1.22531	0.02315	0.717749	UP
XLOC_006973	RBP4	10	93566664	93604480	4.15166	14.1454	1.76857	0.0298	0.820508	UP
XLOC_007313	IFITM1,IFITM2	11	307630	315272	176.591	422.545	1.25869	0.01795	0.615592	UP
XLOC_007360	LSP1	11	1852969	1892267	0.481538	34.6266	6.16809	0.0001	0.0191329	UP
XLOC_007655	FIBIN	11	26994183	26996121	7.5817	19.1289	1.33516	0.01855	0.633182	UP
XLOC_007783	CD82	11	44564426	44620363	18.6049	58.5078	1.65294	0.00455	0.261508	UP
XLOC_007818	NR1H3	11	47239301	47269032	2.651	7.8107	1.55892	0.0311	0.84327	UP
XLOC_007967	SERPING1	11	57597386	57614853	28.0741	62.8412	1.16247	0.0326	0.857712	UP
XLOC_008215	ALDH3B1	11	68008577	68030461	11.2321	23.247	1.04942	0.0455	0.99965	UP
XLOC_008311	PLEKHB1	11	73646177	73662819	0.0689642	0.512913	2.8948	0.00385	0.236215	UP
XLOC_008648	NNMT	11	114059592	114356571	272.896	881.938	1.69233	0.0098	0.419123	UP
XLOC_008939	H19,MIR675	11	1995162	2001470	0.236313	11.0084	5.54176	0.0001	0.0191329	UP
XLOC_008940	IGF2,INS,INS-IGF2	11	2129111	2161341	12.9254	654.164	5.66137	5e-05	0.0106919	UP
XLOC_008950	CDKN1C	11	2883212	2885881	0.702316	3.32588	2.24355	0.02405	0.736234	UP
XLOC_008958	OSBPL5	11	3087115	3166739	6.52237	16.8212	1.36681	0.0098	0.419123	UP
XLOC_009124	MRVI1	11	10541271	10693988	10.0083	23.2974	1.21897	0.0337	0.864253	UP
XLOC_009185	SAA2,SAA2-SAA4,SAA4	11	18112471	18248643	0.103376	5.262	5.66964	0.00465	0.264124	UP
XLOC_009341	TP53I11	11	44719391	44951306	22.377	101.474	2.18102	0.0003	0.0411538	UP
XLOC_009487	PRG2,RP11-872D17.8,SLC43A3	11	57386793	57427580	11.0182	26.326	1.25659	0.00795	0.374113	UP
XLOC_009584	FADS3	11	61873518	61892051	43.877	101.606	1.21144	0.034	0.868882	UP
XLOC_009706	CD248	11	66312852	66319237	30.485	86.6914	1.50779	0.00605	0.319902	UP
XLOC_009890	LRRC32	11	76657055	76670747	3.94079	13.2033	1.74434	0.0025	0.179076	UP
XLOC_009963	ME3	11	86431589	86672636	2.70997	7.26373	1.42243	0.02775	0.78352	UP
XLOC_010049	SESN3	11	95150538	95234104	1.44363	3.06362	1.08553	0.03615	0.891341	UP
XLOC_010093	MMP13	11	102942994	102955734	0.0497002	1.48322	4.89934	0.0396	0.933264	UP
XLOC_010181	CRYAB	11	111908564	111926872	79.878	259.787	1.70146	0.00175	0.144584	UP
XLOC_010284	C1QTNF5,MFRP	11	119338933	119346673	8.74837	26.0794	1.57582	0.01375	0.515306	UP
XLOC_010490	CCND2	12	4248764	4305350	0.247577	1.46249	2.56247	0.01065	0.439948	UP
XLOC_010705	PDE3A	12	20361731	20684381	0.347372	1.17664	1.76011	0.0415	0.95786	UP
XLOC_010929	TROAP	12	49292630	49331731	0.101507	0.470639	2.21304	0.0173	0.598951	UP
XLOC_010964	METTL7A	12	50923471	50932517	0.434319	5.10576	3.5553	0.00065	0.0700122	UP
XLOC_010979	ACVRL1	12	51906907	51923361	0.396256	1.91177	2.2704	0.0174	0.599558	UP
XLOC_011126	INHBE	12	57452322	57459280	0.197373	1.55179	2.97494	0.0394	0.93157	UP
XLOC_011316	OTOGL	12	80209452	80379090	0.0961571	2.46246	4.67856	0.0024	0.176255	UP
XLOC_012136	ST8SIA1	12	22046173	22437041	0.219082	1.37204	2.64678	0.0274	0.779694	UP
XLOC_012203	TMTC1	12	29500839	29784759	0.331141	14.9261	5.49424	5e-05	0.0106919	UP
XLOC_012336	SLC38A4	12	46383678	46876159	0.214381	2.19784	3.35784	0.00965	0.419123	UP
XLOC_012695	RP11-81H14.2	12	68332887	68451663	0.347173	2.06156	2.57001	0.0429	0.977757	UP
XLOC_012705	CPM	12	68808171	68971570	2.43666	46.5172	4.25479	0.00745	0.357526	UP
XLOC_012833	DCN	12	91140483	91183123	341.652	1066	1.64161	0.0387	0.925554	UP
XLOC_012986	TMEM119	12	108589845	108598320	5.11117	63.0993	3.6259	5e-05	0.0106919	UP
XLOC_013371	TNFRSF19	13	23570369	23676104	2.83808	9.2822	1.70955	0.0035	0.223217	UP
XLOC_013452	FRY	13	32025313	32299122	0.522458	1.81873	1.79954	0.0403	0.943643	UP
XLOC_013512	RGCC	13	41457558	41470882	1.76367	25.5913	3.859	0.0017	0.141255	UP
XLOC_013880	MYO16	13	108596151	109208007	0.0143164	0.656791	5.5197	0.02855	0.796824	UP
XLOC_014087	SLC46A3	13	28700063	28718970	2.7313	6.88647	1.33418	0.0397	0.934106	UP
XLOC_014188	FOXO1	13	40555666	40666597	1.25907	4.89566	1.95914	0.0055	0.299534	UP
XLOC_014368	PCDH9	13	66302833	67230445	0.150883	2.79833	4.21306	0.00615	0.322842	UP
XLOC_014486	ABCC4	13	95019828	95301446	3.43153	7.53665	1.13507	0.03245	0.857712	UP
XLOC_014560	EFNB2	13	106489730	106535114	1.78044	16.7718	3.23573	5e-05	0.0106919	UP
XLOC_014577	IRS2	13	109752697	109808252	3.57726	13.2812	1.89246	0.00045	0.0545288	UP
XLOC_015181	HIF1A,SNAPC1	14	61681040	61796428	109.226	269.756	1.30434	0.0429	0.977757	UP
XLOC_015463	SERPINA3,SERPINA4,SERPINA5	14	94561090	94624646	0.837024	4.1648	2.3149	0.0032	0.210548	UP
XLOC_015899	PRKD1	14	29576478	30297043	9.58581	22.3654	1.2223	0.01565	0.560509	UP
XLOC_016041	Metazoa_SRP	14	49853615	49853914	3.15546	32.7271	3.37456	0.0127	0.491145	UP
XLOC_016042	RN7SL2	14	49862546	49862849	225.231	1066.08	2.24284	0.02405	0.736234	UP
XLOC_016376	STON2	14	81260655	81436465	0.0452644	0.529492	3.54816	0.01025	0.428291	UP
XLOC_016463	CLMN	14	95181939	95319906	0.299667	1.77197	2.56392	0.019	0.639535	UP
XLOC_017077	CHAC1	15	40952961	40956519	8.91588	22.1474	1.31269	0.025	0.753867	UP
XLOC_017632	ACAN	15	88803442	88875354	1.51602	4.50652	1.57173	0.02555	0.755127	UP
XLOC_018204	TNFAIP8L3	15	51037487	51338610	4.31348	11.8617	1.45939	0.01695	0.592476	UP
XLOC_018678	IDH2	15	90083044	90102504	12.4138	27.9089	1.16878	0.0357	0.890138	UP
XLOC_018706	RGMA	15	93035272	93089204	0.132383	0.718277	2.43982	0.0162	0.574547	UP
XLOC_019046	SHISA9	16	12901619	13240413	0.222402	2.13183	3.26085	0.0025	0.179076	UP
XLOC_019615	MMP15	16	58025565	58046901	0.341381	2.75461	3.01239	0.006	0.318416	UP
XLOC_019741	RP11-394B2.1	16	70661203	70686066	10.2561	24.3191	1.24561	0.0472	0.99965	UP
XLOC_019888	WFDC1	16	84294645	84329851	0.958682	11.7151	3.61118	0.0007	0.072705	UP
XLOC_019894	CRISPLD2	16	84819983	84920768	4.03502	88.1295	4.44898	5e-05	0.0106919	UP
XLOC_019949	ZNF469	16	88427470	88440757	0.98981	2.50655	1.34048	0.018	0.615854	UP
XLOC_020171	PPL	16	4882506	5097808	0.155811	2.13996	3.77972	0.0217	0.685956	UP
XLOC_020230	SOCS1	16	11249618	11351762	0.757969	4.2975	2.50329	0.0204	0.663616	UP
XLOC_020449	SULT1A1	16	28605195	28623625	0.0878337	0.464288	2.40217	0.0451	0.99965	UP
XLOC_020751	CES1	16	55802850	55833337	0.759394	4.60393	2.59995	0.0017	0.141255	UP
XLOC_021131	CYBA	16	88643282	88651152	32.8437	70.1628	1.09509	0.03345	0.862405	UP
XLOC_021195	SERPINF1	17	1761958	1777574	5.9192	24.1538	2.02877	0.00405	0.244361	UP
XLOC_022032	CALCOCO2	17	48830987	48866522	36.4133	114.307	1.65038	0.00405	0.244361	UP
XLOC_022082	CACNA1G	17	50556206	50631940	0.0460085	0.684756	3.89562	5e-05	0.0106919	UP
XLOC_022083	ABCC3	17	50634776	50692252	14.394	36.3557	1.33672	0.016	0.570235	UP
XLOC_022124	NOG	17	56593698	56595590	1.81131	14.0945	2.96002	0.00085	0.0846565	UP
XLOC_022547	NXN	17	799312	979770	10.3329	22.9882	1.15365	0.0216	0.684282	UP
XLOC_022562	TLCD2	17	1702789	1710438	0.625907	2.15691	1.78494	0.0272	0.777044	UP
XLOC_022567	RTN4RL1	17	1934676	2025345	0.146569	1.9837	3.75855	0.00645	0.326793	UP
XLOC_022633	VMO1	17	4785284	4786433	0.309483	6.40519	4.37131	0.0258	0.75777	UP
XLOC_022784	PMP22	17	15229776	15265707	13.3326	41.7088	1.6454	0.00135	0.121928	UP
XLOC_022874	MFAP4	17	19337553	19387240	4.82618	23.756	2.29934	0.0103	0.429147	UP
XLOC_023327	BRCA1	17	43044294	43125483	0.363509	0.969388	1.41508	0.03525	0.885268	UP
XLOC_023587	SEPT4	17	58519836	58692055	0.308723	2.91452	3.23887	5e-05	0.0106919	UP
XLOC_023686	TEX2	17	64147226	64263301	7.52975	16.5374	1.13506	0.0227	0.706811	UP
XLOC_023733	ABCA8	17	68867291	69061064	0.478793	2.18075	2.18735	0.00435	0.25403	UP
XLOC_023811	TRIM47	17	75874160	75879546	1.14374	4.37145	1.93435	0.03495	0.882036	UP
XLOC_023828	CYGB	17	76527355	76557683	3.63651	16.1267	2.14882	0.00705	0.342856	UP
XLOC_023877	TBC1D16	17	79932342	80035848	5.69953	15.5452	1.44755	0.00685	0.337647	UP
XLOC_023886	NPTX1	17	80467147	80477843	0.0596851	0.72877	3.61002	0.02135	0.679427	UP
XLOC_023944	SECTM1	17	82321023	82334074	0.478858	8.51167	4.15177	0.00015	0.0253622	UP
XLOC_024096	IMPA2	18	11981024	12030883	2.4529	22.7698	3.21456	0.0002	0.0319582	UP
XLOC_024939	MRO	18	50795119	50825402	0.0447823	0.475192	3.40751	0.02885	0.803655	UP
XLOC_024960	CCDC68	18	54901508	54959508	1.30679	7.34101	2.48995	0.0026	0.182641	UP
XLOC_025140	FSTL3	19	676364	683390	19.6404	69.7853	1.8291	0.00015	0.0253622	UP
XLOC_025142	PALM	19	709092	748330	0.373117	3.02569	3.01956	0.00225	0.172196	UP
XLOC_025150	CFD	19	859642	863630	0.367365	3.10759	3.08051	0.01585	0.566277	UP
XLOC_025200	GADD45B	19	2476121	2478259	35.1362	82.7705	1.23616	0.0142	0.524067	UP
XLOC_025616	CILP2	19	19538247	19546659	0.197504	3.15388	3.99718	0.00205	0.160264	UP
XLOC_025882	KCNK6	19	38319843	38332076	2.10425	8.04893	1.93549	0.0021	0.163295	UP
XLOC_025908	ZFP36	19	39406812	39409412	9.3845	23.3376	1.31431	0.01485	0.541188	UP
XLOC_026030	APOC1,APOE	19	44905753	44919349	0.678696	9.90275	3.86699	0.00015	0.0253622	UP
XLOC_026078	NPAS1	19	47019819	47045775	2.65362	10.2292	1.94666	0.0156	0.560098	UP
XLOC_026084	C5AR2	19	47332146	47347327	0.131347	2.01659	3.94046	0.002	0.158054	UP
XLOC_026556	TLE2	19	2997637	3047635	1.64244	6.33785	1.94815	0.0039	0.238277	UP
XLOC_026640	C3	19	6677703	6737603	2.75572	23.55	3.09522	5e-05	0.0106919	UP
XLOC_026681	MYO1F	19	8520789	8577577	0.010221	0.725754	6.14987	0.00025	0.0363525	UP
XLOC_026717	COL5A3	19	9959560	10010471	0.820731	4.84905	2.56272	0.0008	0.0825021	UP
XLOC_026926	COMP	19	18782772	18791314	17.3252	63.9492	1.88406	0.00025	0.0363525	UP
XLOC_027193	PPP1R14A	19	38244034	38305009	1.38282	45.3602	5.03575	0.00385	0.236215	UP
XLOC_027556	HAS1	19	51713111	51723994	6.27894	55.6208	3.14703	5e-05	0.0106919	UP
XLOC_027557	FPR1	19	51745171	51826189	2.64324	18.965	2.84296	0.003	0.198286	UP
XLOC_028031	VIT	2	36696689	36814792	0.090799	3.70493	5.35063	0.0087	0.395136	UP
XLOC_028233	SLC1A4	2	64988476	65023865	8.88377	21.2994	1.26157	0.012	0.474163	UP
XLOC_028411	ATOH8	2	85751343	85788066	8.11487	22.2695	1.45643	0.0135	0.510442	UP
XLOC_028515	KCNIP3	2	95297303	95386083	0.401291	4.69041	3.54699	0.0005	0.0600868	UP
XLOC_028599	IL1R1	2	102064543	102182108	18.7817	41.0676	1.12867	0.0259	0.75777	UP
XLOC_028601	IL18R1,IL1RL1	2	102311501	102398775	0.0266883	0.615301	4.52702	0.00055	0.0644964	UP
XLOC_028670	SH3RF3	2	109129347	109504632	1.73132	7.19409	2.05494	0.0004	0.0505774	UP
XLOC_028919	HNMT	2	137964019	138016364	3.71692	13.9511	1.9082	0.0292	0.808757	UP
XLOC_028978	TNFAIP6	2	151357591	151380048	3.6941	9.77596	1.40401	0.04815	0.99965	UP
XLOC_029279	AOX1	2	200585867	200677064	18.8926	40.3779	1.09575	0.03475	0.880313	UP
XLOC_029352	PARD3B	2	204545792	205620162	1.79173	4.25366	1.24736	0.02055	0.665518	UP
XLOC_029393	MAP2	2	209424057	209734118	0.33337	1.16892	1.80998	0.0225	0.705113	UP
XLOC_029444	IGFBP2	2	216632827	216664436	99.3624	488.409	2.29732	0.00035	0.0454406	UP
XLOC_029527	KCNE4	2	223051813	223198399	5.48054	35.2987	2.68723	5e-05	0.0106919	UP
XLOC_029642	ACKR3	2	236567786	236582358	0.584176	3.94483	2.75549	0.005	0.276445	UP
XLOC_029656	ESPNL	2	238100156	238133287	0.0514886	0.891947	4.11463	0.02095	0.674203	UP
XLOC_029685	SNED1	2	240998837	241102332	2.39331	14.6127	2.61014	0.00975	0.419123	UP
XLOC_030030	CYP1B1	2	37923186	38239590	67.733	246.783	1.86531	0.0108	0.442374	UP
XLOC_030434	ST3GAL5	2	85839143	85889014	10.2588	28.3511	1.46655	0.00355	0.225417	UP
XLOC_030667	SH3RF3-AS1	2	109127326	109128930	0.616964	2.79605	2.18013	0.03925	0.929535	UP
XLOC_030786	LIMS2	2	127638380	127681786	10.6818	24.4186	1.19283	0.03085	0.840056	UP
XLOC_030796	HS6ST1	2	128236715	128318577	2.84948	6.60809	1.21353	0.0313	0.844403	UP
XLOC_031128	CHN1	2	174799362	175005369	2.07011	6.375	1.62272	0.01975	0.652693	UP
XLOC_031192	PDE1A	2	182140035	182523192	0.0972669	1.26868	3.70524	0.002	0.158054	UP
XLOC_031371	FZD5	2	207762585	207769563	0.749137	3.13907	2.06704	0.00635	0.325124	UP
XLOC_031526	COL4A4	2	227002710	227164113	0.551506	2.34197	2.08627	0.00295	0.19677	UP
XLOC_031528	TM4SF20	2	227362155	227381995	0.932044	6.15193	2.72257	0.00285	0.192753	UP
XLOC_031694	TRIB3	20	362834	397559	27.3318	80.1071	1.55135	0.0026	0.182641	UP
XLOC_031924	ID1	20	31605282	31606515	10.028	38.1473	1.92755	0.00235	0.175238	UP
XLOC_032027	VSTM2L	20	37903103	37945350	0.687083	3.13634	2.19053	0.01225	0.481425	UP
XLOC_032092	WISP2	20	44656450	44810338	0.375921	4.70043	3.64429	0.0043	0.25403	UP
XLOC_032734	SAMHD1	20	36876120	36951843	4.44386	10.0706	1.18026	0.03185	0.855589	UP
XLOC_032795	JPH2	20	44111694	44187578	0.339599	1.58741	2.22478	0.01475	0.538894	UP
XLOC_032879	KCNB1	20	49363876	49482647	0.238654	0.711582	1.57611	0.0498	0.99965	UP
XLOC_033334	DSCR8,KCNJ15	21	38121450	38307357	0.520117	3.31668	2.67283	0.00065	0.0700122	UP
XLOC_033427	ADARB1	21	45070951	45226560	31.6782	86.809	1.45435	0.01235	0.484047	UP
XLOC_034154	SUSD2	22	24181258	24189110	0.208763	27.6731	7.05048	0.00055	0.0644964	UP
[truncated: 408 more rows]
