# Supplementary material for: Unravelling microRNA regulation and miRNA–mRNA regulatory networks in osteogenesis driven by 3D nanotopographical cues
Source: Royal Society of Chemistry journal article supplement (doi:10.1039/d3bm01597a), 2023-12-21
Supplement: d3bm01597a2.xlsx [file d3bm01597a2.xlsx]

## Sheet: ReadMe
Sample 1: Cells in 2D, Growth medium
Sample 3: Cells in 3D, Growth medium
Description of worksheets
ReadMe	Current Sheet
Summary	Statistics of expressed genes
Up_Regulated	Significant differential gene expression result of Sample 1 vs Sample 3 (UP Regulated)
Down_Regulated	Significant differential gene expression result of Sample 1 vs Sample 3 (DOWN Regulated)
Neutrally_Regulated	Significant differential gene expression result of Sample 1 vs Sample 3 (NEUTRAL Regulated)
Expressed only 1	Genes which are expressed only in 1
Expressed only 3	Genes which are expressed only in 3
P_Signicant	Genes having P-value as <=0.05
Description of columns in the worksheets
Cuffmerge Gene ID	Gene ID assigned by Cuffmerge
Gene Name	Name of Gene
Chromosome	Name of the chromosome
Gene Start (bp)	Gene start in base pair
Gene End (bp)	Gene end in base pair
FPKM 1	FPKM* of the gene in the sample 1
FPKM 3	FPKM* of the gene in the sample 3
log2(fold_change)	The (base 2) log of the fold change y/x. log2(FPKMc/FPKMb)
P_value	The uncorrected p-value of the test statistic
Q_value	The FDR-adjusted p-value of the test statistic
Regulation	UP / DOWN/ NEUTRAL
* Fragments Per Kilobase of exon per Million fragments mapped (measure of relative abundance of genes)

## Sheet: Summary
DGE Statistics
Summary	Total	Up	Down	Neutral
No. of genes expressed in both samples	14428	424	540	13464
No. of genes expressed only in 1	138	NA	NA	NA
No. of genes expressed only in 3	220	NA	NA	NA
No. of p significant genes	304	42	111	151
Software used for carrying out DGE	Cuffdiff
Sample taken as control for DGE	1
Sample taken as treatment for DGE	3

## Sheet: Up_Regulated
Cuffmerge Gene ID	Gene Name	Chromosome	Gene Start (bp)	Gene End (bp)	FPKM 1	FPKM 3	log2(fold_change)	P_value	Q_value	Regulation
XLOC_017681	AC068831.10,AC068831.11	15	91022618	91036611	0.127662	40.1423	8.29665	0.1393	0.99965	UP
XLOC_027921	DNAJC27-AS1	2	24943635	25039694	0.0291524	1.54473	5.7276	0.0282	0.99965	UP
XLOC_060753	GYG2P1	Y	12354095	12420456	0.0955194	3.37622	5.14347	0.0564	0.99965	UP
XLOC_058566	NHSL2	X	72132149	72141362	0.0748418	1.31657	4.1368	0.19225	0.99965	UP
XLOC_006082	ENO4	10	116828760	117126586	0.0331332	0.577044	4.12233	0.20645	0.99965	UP
XLOC_034909	IL2RB	22	37125837	37199385	0.0227196	0.3832	4.07609	0.11495	0.99965	UP
XLOC_040687	ADAMTS16	5	5140329	5320304	0.0571437	0.960702	4.07142	0.10755	0.99965	UP
XLOC_043817	HLA-H	6	29887293	29890482	0.704324	11.239	3.99613	5e-05	0.07393	UP
XLOC_052408	RP11-483H20.4	9	129608883	129642169	0.143624	1.95194	3.76453	0.48055	0.99965	UP
XLOC_004454	ANGPTL1	1	178724305	178921841	0.0411417	0.547121	3.73318	0.2459	0.99965	UP
XLOC_043956	RP11-513I15.6	6	34246379	34426125	0.0347767	0.421283	3.5986	0.21815	0.99965	UP
XLOC_044112	SLC25A27	6	46652914	46735693	0.149306	1.68019	3.49228	0.0014	0.52292	UP
XLOC_027624	LILRA6,LILRB2,LILRB3	19	54200741	54281184	0.0488278	0.490187	3.32756	0.00435	0.974532	UP
XLOC_010145	C11orf65	11	108157214	108467531	0.0796244	0.756642	3.24833	0.05815	0.99965	UP
XLOC_035675	FTH1P23	3	72888072	73069199	0.113711	1.03739	3.18951	0.51815	0.99965	UP
XLOC_048147	FTLP15	7	45990904	46000898	0.1193	1.08695	3.18762	0.06935	0.99965	UP
XLOC_012714	LINC01481	12	69738680	70354993	0.243625	2.13373	3.13064	0.3721	0.99965	UP
XLOC_029656	ESPNL	2	238100156	238133287	0.0532215	0.462767	3.12021	0.01835	0.99965	UP
XLOC_023658	RP11-180P8.1,RP11-180P8.3	17	62935401	62968549	0.131515	1.14036	3.11619	0.08685	0.99965	UP
XLOC_039325	RP11-714G18.1	4	185159664	185395899	0.103795	0.790407	2.92886	0.4837	0.99965	UP
XLOC_026053	AC074212.6	19	45764784	45792802	0.309713	2.28307	2.88197	0.20975	0.99965	UP
XLOC_019781	RP11-346C20.3,RP11-346C20.4	16	73060244	73062316	0.103913	0.755119	2.86133	0.03085	0.99965	UP
XLOC_047045	AC003991.3	7	88205117	88306891	0.0620289	0.429527	2.79174	0.01175	0.99965	UP
XLOC_017325	RP11-317G6.1	15	63608617	63833942	0.10547	0.723009	2.77718	0.52505	0.99965	UP
XLOC_050238	RP5-855D21.1	8	213185	247342	0.232874	1.59235	2.77354	0.1662	0.99965	UP
XLOC_039541	RP11-665G4.1	4	15002673	15446166	0.117704	0.798473	2.76208	0.3702	0.99965	UP
XLOC_036119	RP11-319G6.1	3	139389814	139678017	0.108889	0.718541	2.72222	0.0362	0.99965	UP
XLOC_014085	PAN3-AS1	13	28136842	28138193	0.0737024	0.484856	2.71777	0.1106	0.99965	UP
XLOC_060180	MIR424,MIR503HG	X	134543336	134546721	0.441946	2.89562	2.71193	0.01755	0.99965	UP
XLOC_015901	CTD-2251F13.1	14	29576478	30297043	0.0725358	0.473919	2.70788	0.3994	0.99965	UP
XLOC_032124	SLC12A5	20	46008907	46060152	0.0809247	0.52522	2.69827	0.0102	0.99965	UP
XLOC_019096	CTD-2576D5.4	16	17101768	17470881	0.0919271	0.561911	2.61178	0.52375	0.99965	UP
XLOC_046935	POM121B	7	73293496	73301161	0.0752602	0.453338	2.59063	0.03105	0.99965	UP
XLOC_051592	LINC01239	9	22646199	22824213	0.120137	0.721596	2.58652	0.02435	0.99965	UP
XLOC_027745	CTD-2619J13.23	19	58467044	58512413	0.179645	1.07631	2.58288	0.3699	0.99965	UP
XLOC_010514	SCARNA10	12	6491885	6531955	0.265595	1.56262	2.55667	0.52205	0.99965	UP
XLOC_015364	CTD-2506P8.6	14	81175451	81222460	0.0905978	0.524845	2.53434	0.4849	0.99965	UP
XLOC_017898	GABRB3	15	26543545	26949207	0.0911471	0.505666	2.47192	0.02095	0.99965	UP
XLOC_012506	RP11-834C11.7	12	54058253	54125992	0.0781107	0.428434	2.45548	0.37125	0.99965	UP
XLOC_026257	ZNF813	19	53467734	53496255	0.75554	4.1321	2.4513	0.12995	0.99965	UP
XLOC_047377	TPI1P2	7	129056018	129056770	0.0745161	0.400163	2.42497	0.1504	0.99965	UP
XLOC_011897	CACNA1C-AS1	12	1946053	2697950	0.0758127	0.406461	2.4226	0.4861	0.99965	UP
XLOC_036451	RP11-48F14.2	3	186454981	186493661	0.0833318	0.446589	2.42201	0.17865	0.99965	UP
XLOC_017132	RP11-151N17.1	15	44537056	44663678	0.0896622	0.47981	2.41989	0.5262	0.99965	UP
XLOC_025461	AC007787.3	19	12995607	13098796	0.100843	0.538419	2.41662	0.50255	0.99965	UP
XLOC_001240	UBE2FP3	1	111437513	111438037	0.121965	0.647821	2.40913	0.15055	0.99965	UP
XLOC_019571	MT3	16	56589073	56591088	0.125461	0.66589	2.40804	0.05335	0.99965	UP
XLOC_028734	AC016745.3	2	113424494	113425324	0.12767	0.677234	2.40723	0.15055	0.99965	UP
XLOC_004713	SERTAD4-AS1	1	210231455	210246631	0.102741	0.543003	2.40195	0.21765	0.99965	UP
XLOC_044565	PKIB	6	122471916	122726373	0.111959	0.582954	2.38041	0.03175	0.99965	UP
XLOC_026653	CTB-133G6.2	19	7348942	7472477	0.221662	1.15041	2.37572	0.5344	0.99965	UP
XLOC_020541	PRSS36	16	31138924	31150094	0.118867	0.60734	2.35316	0.0801	0.99965	UP
XLOC_045592	GUSBP4	6	57919783	57930291	0.172592	0.85829	2.3141	0.1353	0.99965	UP
XLOC_021770	CTB-91J4.1	17	36116176	36439566	0.304256	1.49031	2.29226	0.2151	0.99965	UP
XLOC_029573	C2orf72	2	231037489	231049719	0.103057	0.480986	2.22255	0.0506	0.99965	UP
XLOC_022702	RP11-199F11.2	17	7661778	7703502	0.0923512	0.427784	2.21168	0.543	0.99965	UP
XLOC_052978	RP11-15J10.1	9	65287913	65323015	0.0892955	0.409618	2.19762	0.17785	0.99965	UP
XLOC_017229	RP11-23N2.4	15	52577841	52709817	0.0931343	0.42671	2.19587	0.52205	0.99965	UP
XLOC_059436	BX842568.4	X	36985522	36986093	0.107813	0.492449	2.19144	0.17785	0.99965	UP
XLOC_000029	SAMD11	1	924879	959309	0.299379	1.36728	2.19126	0.06945	0.99965	UP
XLOC_007337	CRACR2B	11	818901	842545	0.180599	0.816564	2.17678	0.13195	0.99965	UP
XLOC_016519	CTD-2017C7.2	14	101761797	101927989	0.154824	0.699595	2.17589	0.52385	0.99965	UP
XLOC_027201	MAP4K1	19	38587640	38618882	0.119544	0.530621	2.15014	0.02985	0.99965	UP
XLOC_038658	C4orf26	4	75556047	75565885	0.112048	0.497186	2.14967	0.0748	0.99965	UP
XLOC_002080	RP11-134G8.7	1	201483529	201533608	0.250631	1.10919	2.14586	0.4967	0.99965	UP
XLOC_006186	RP11-45A17.2	10	131966454	131981931	0.262448	1.15875	2.14247	0.5217	0.99965	UP
XLOC_040316	RP11-481K16.2	4	143513462	143557486	0.297015	1.30389	2.13421	0.4246	0.99965	UP
XLOC_024962	CTD-2171N6.1	18	55105903	55124306	0.0930091	0.40792	2.13284	0.08335	0.99965	UP
XLOC_003087	RN7SKP16	1	33306765	33431052	0.326538	1.42315	2.12377	0.52035	0.99965	UP
XLOC_023450	RP5-890E16.2	17	48045140	48048073	0.111586	0.480518	2.10644	0.074	0.99965	UP
XLOC_000128	Metazoa_SRP	1	8861001	8879894	0.458655	1.95947	2.09498	0.4924	0.99965	UP
XLOC_011482	STAB2	12	103587272	103768858	0.186785	0.785707	2.07261	0.13205	0.99965	UP
XLOC_007984	GLYATL1	11	58905397	59058659	0.116166	0.488407	2.0719	0.01175	0.99965	UP
XLOC_044867	HNRNPA1P49	6	166319727	166342591	0.177517	0.728892	2.03775	0.4306	0.99965	UP
XLOC_029930	RP11-503P10.1	2	27042363	27071773	0.265759	1.08364	2.0277	0.5607	0.99965	UP
XLOC_040510	RP11-798M19.6	4	173363779	173377532	0.597156	2.40437	2.00948	0.2921	0.99965	UP
XLOC_030339	DGUOK-AS1	2	73926825	73981441	0.100379	0.403947	2.00871	0.44285	0.99965	UP
XLOC_009886	RP11-111M22.3	11	76441337	76444656	0.340616	1.3484	1.98503	0.073	0.99965	UP
XLOC_032029	BPI	20	38210487	38337505	0.217346	0.859734	1.9839	0.2086	0.99965	UP
XLOC_044519	RP11-544L8__B.4	6	113904137	113921642	0.501709	1.96502	1.96962	0.00075	0.382397	UP
XLOC_026900	CTD-3131K8.2	19	17468768	17521288	0.149291	0.572652	1.93953	0.5499	0.99965	UP
XLOC_012587	RP11-123K3.9	12	57229326	57240715	0.163238	0.625154	1.93723	0.55495	0.99965	UP
XLOC_016069	FRMD6-AS2	14	51454511	51730727	0.105216	0.401102	1.93062	0.50625	0.99965	UP
XLOC_011598	RP11-545P7.9	12	113195440	113298585	0.10624	0.404531	1.92893	0.5674	0.99965	UP
XLOC_019215	FLJ21408	16	27224990	27290492	0.109436	0.416429	1.92799	0.4202	0.99965	UP
XLOC_017984	RP11-3D4.2	15	33310961	33866102	0.110263	0.419462	1.92759	0.3698	0.99965	UP
XLOC_001560	BX470102.3	1	153533602	153536244	0.239253	0.908202	1.92448	0.51415	0.99965	UP
XLOC_028331	DCTN1-AS1	2	74198561	74393882	0.121965	0.46293	1.92432	0.48105	0.99965	UP
XLOC_024773	RP11-799B12.2	18	23992772	24135829	0.128046	0.485115	1.92166	0.3937	0.99965	UP
XLOC_018810	Z69720.2	16	77006	138860	0.142765	0.53878	1.91606	0.56955	0.99965	UP
XLOC_051348	COL22A1	8	138588234	138914006	0.103783	0.391261	1.91455	0.1394	0.99965	UP
XLOC_022988	AC010761.6	17	28719392	28743455	0.15825	0.595207	1.91118	0.5163	0.99965	UP
XLOC_034174	IGLL3P	22	25318255	25320080	0.162905	0.612308	1.91022	0.239	0.99965	UP
XLOC_009384	RP11-750H9.7	11	47465943	47584562	0.165373	0.621231	1.90941	0.5518	0.99965	UP
XLOC_027423	RPL23AP80	19	47794466	47794920	0.169213	0.635114	1.90817	0.331	0.99965	UP
XLOC_034381	APOBEC3H	22	39097223	39104067	0.15936	0.593807	1.89771	0.111	0.99965	UP
XLOC_004516	CTA-253N17.1	1	185157079	185291765	0.207799	0.77332	1.89588	0.37855	0.99965	UP
XLOC_040039	ADH6	4	99088856	99301356	0.126571	0.464849	1.87682	0.2754	0.99965	UP
XLOC_029397	RP11-260M2.1	2	210002564	210171383	0.304295	1.10846	1.86502	0.452	0.99965	UP
XLOC_009490	RN7SL605P	11	57528084	57528365	0.375257	1.35337	1.85061	0.2405	0.99965	UP
XLOC_025312	LRRC8E	19	7888504	7903542	0.337933	1.19881	1.82679	0.2621	0.99965	UP
XLOC_024465	CCDC102B	18	68673687	69055189	0.212482	0.750132	1.8198	0.10795	0.99965	UP
XLOC_044414	RP3-467N11.1	6	100881470	100882987	0.129294	0.450779	1.80177	0.0959	0.99965	UP
XLOC_001608	MTX1P1	1	155230974	155234325	0.129961	0.449656	1.79074	0.19635	0.99965	UP
XLOC_047739	RNF32	7	156472195	156893230	0.142288	0.491769	1.78917	0.12675	0.99965	UP
XLOC_003900	FAM72B	1	121167645	121463129	0.170127	0.586094	1.78452	0.3317	0.99965	UP
XLOC_031327	RP11-686O6.2	2	202374931	202375604	0.172251	0.593052	1.78364	0.19635	0.99965	UP
XLOC_046213	RP11-52J3.2	6	157700386	157945077	0.19581	0.672316	1.77969	0.5801	0.99965	UP
XLOC_002302	RP11-504P24.9	1	223992742	224010612	0.214571	0.735134	1.77655	0.37305	0.99965	UP
XLOC_023587	SEPT4	17	58519836	58692055	0.319112	1.0901	1.77233	0.00695	0.99965	UP
XLOC_033980	TMEM191A	22	20701113	20704606	0.277256	0.9453	1.76955	0.043	0.99965	UP
XLOC_016306	RP11-950C14.3	14	75002910	75012851	0.270357	0.920355	1.76732	0.4634	0.99965	UP
XLOC_031853	RPL24P2	20	21114722	21115197	0.565205	1.92138	1.7653	0.097	0.99965	UP
XLOC_034507	RP3-522J7.5	22	49773282	49827512	0.292051	0.99174	1.76374	0.5688	0.99965	UP
XLOC_035484	ARIH2	3	48917787	49023495	18.9399	63.3509	1.74194	0.17655	0.99965	UP
XLOC_022891	SRP68P3	17	20415546	20431008	0.489835	1.62782	1.73258	0.30575	0.99965	UP
XLOC_025506	AC005785.2	19	15353384	15419141	0.136058	0.451746	1.73129	0.6169	0.99965	UP
XLOC_042987	AC034220.3	5	132184875	132395614	0.231101	0.767025	1.73075	0.39005	0.99965	UP
XLOC_044774	ESR1	6	151656690	152637801	0.470744	1.55776	1.72646	0.3153	0.99965	UP
XLOC_003887	CH17-472G23.2	1	120197084	120341871	1.31214	4.31949	1.71894	0.08405	0.99965	UP
XLOC_048386	CTB-51J22.1	7	74027788	74069907	0.357991	1.17755	1.71779	0.6046	0.99965	UP
XLOC_022343	GPRC5C	17	74424850	74451653	0.204832	0.669259	1.70812	0.0406	0.99965	UP
XLOC_048607	ACHE	7	100889993	100896974	0.128466	0.419185	1.7062	0.07065	0.99965	UP
XLOC_058216	TAB3-AS2	X	30827441	30975084	0.687451	2.24277	1.70596	0.5376	0.99965	UP
XLOC_036718	EFHB	3	19879471	19947025	0.140802	0.459197	1.70545	0.173	0.99965	UP
XLOC_022680	CTD-2545G14.4	17	7189889	7225273	3.40554	11.0901	1.70332	0.5506	0.99965	UP
XLOC_011126	INHBE	12	57452322	57459280	0.204017	0.663842	1.70215	0.07585	0.99965	UP
XLOC_021391	RP11-849N15.1,RP11-849N15.3	17	15229776	15265707	0.150193	0.487924	1.69984	0.58865	0.99965	UP
XLOC_040111	RBMXP4,SEC24B-AS1	4	109346325	109540896	0.124081	0.40234	1.69714	0.31245	0.99965	UP
XLOC_013452	FRY	13	32025313	32299122	0.540039	1.75064	1.69675	0.00855	0.99965	UP
XLOC_026644	SH2D3A	19	6752159	6767588	0.190846	0.615759	1.68995	0.0536	0.99965	UP
XLOC_029288	AC005037.3	2	200908972	201085750	0.136873	0.437308	1.67581	0.5524	0.99965	UP
XLOC_052201	RP11-508N12.4,ZNF462	9	106863096	107102988	1.52036	4.8554	1.67518	0.0574	0.99965	UP
XLOC_047071	AC002454.1	7	92604920	92917187	0.164129	0.520119	1.66401	0.386	0.99965	UP
XLOC_041168	F2RL1	5	76818932	76835315	0.242111	0.766263	1.66217	0.0277	0.99965	UP
XLOC_052585	CDC37L1-AS1	9	4676599	4679502	1.19443	3.77123	1.65872	0.2035	0.99965	UP
XLOC_001993	PACERR	1	186680621	186681446	0.132525	0.407456	1.62038	0.21385	0.99965	UP
XLOC_015490	RP11-872J21.5	14	96500809	96567111	0.230227	0.706125	1.61687	0.61255	0.99965	UP
XLOC_011134	SLC26A10	12	57610179	57633355	0.416976	1.27734	1.61511	0.18685	0.99965	UP
XLOC_030815	RHOQP3	2	130212869	130213490	0.191935	0.586058	1.61043	0.21385	0.99965	UP
XLOC_052838	HMGB3P24	9	36190855	36304924	0.191602	0.584801	1.60983	0.5882	0.99965	UP
XLOC_027287	CTD-2575K13.6	19	41883160	41930150	0.171576	0.523536	1.60944	0.5398	0.99965	UP
XLOC_027506	CTD-2545M3.8	19	50466784	50490870	0.190038	0.579828	1.60933	0.59145	0.99965	UP
XLOC_017795	RP11-173D3.1	15	20128744	20147953	0.215096	0.655022	1.60657	0.2058	0.99965	UP
XLOC_004610	RP11-465N4.4	1	201982371	202017188	0.130728	0.396011	1.59898	0.5956	0.99965	UP
XLOC_014201	RP11-74J13.9	13	41132938	41263577	0.131927	0.39946	1.59831	0.46945	0.99965	UP
XLOC_005826	RP11-149I23.3	10	89213568	89414557	0.132714	0.401817	1.59821	0.506	0.99965	UP
XLOC_011166	RP11-631N16.4	12	62601750	62622213	2.82129	8.53872	1.59767	0.0654	0.99965	UP
XLOC_025393	CTC-510F12.7	19	11199294	11262481	0.134347	0.406606	1.59767	0.56715	0.99965	UP
XLOC_041890	CTC-308K20.2	5	172954785	172969771	0.135191	0.409056	1.5973	0.55425	0.99965	UP
XLOC_023128	AC015849.19	17	35574794	35868891	0.271197	0.820551	1.59725	0.5608	0.99965	UP
XLOC_023050	RP11-848P1.5	17	31008496	31382116	0.13401	0.405397	1.597	0.55665	0.99965	UP
XLOC_049380	CTD-2647L4.1	8	29067278	29263124	0.279886	0.846049	1.5959	0.59055	0.99965	UP
XLOC_022067	AC002401.1	17	50133734	50150630	0.144673	0.436606	1.59353	0.56515	0.99965	UP
XLOC_025179	CTB-25B13.9	19	1505017	1513604	0.150038	0.45248	1.59253	0.43145	0.99965	UP
XLOC_041560	AC006077.3	5	134904905	135011707	0.150038	0.452472	1.5925	0.4329	0.99965	UP
XLOC_045569	RP3-523E19.2	6	53794496	53924121	0.150585	0.453978	1.59204	0.4501	0.99965	UP
XLOC_031366	AC007879.5	2	207239649	207625928	0.236036	0.711409	1.59167	0.56285	0.99965	UP
XLOC_015935	RPS19P3	14	34556773	34630183	0.158775	0.477903	1.58974	0.57095	0.99965	UP
XLOC_011142	RP11-571M6.18	12	57762333	57818704	0.163551	0.491611	1.58778	0.57505	0.99965	UP
XLOC_021192	RP11-961A15.3	17	1650628	1685151	0.167922	0.504343	1.58662	0.5439	0.99965	UP
XLOC_014234	RP11-442J21.2	13	44651811	44715393	0.175322	0.525713	1.58427	0.36565	0.99965	UP
XLOC_001569	RP11-422P24.10	1	153959098	153977688	0.175326	0.525713	1.58424	0.59995	0.99965	UP
XLOC_025385	AC007229.3	19	10836574	10869790	0.177457	0.531862	1.58358	0.3661	0.99965	UP
XLOC_046673	AC004453.8	7	44379120	44490880	0.541166	1.621	1.58274	0.64115	0.99965	UP
XLOC_002218	RP11-565J7.1	1	211936248	211936634	0.198383	0.591835	1.57691	0.3669	0.99965	UP
XLOC_051703	LINC00961	9	35909482	35911686	0.181199	0.538424	1.57116	0.08505	0.99965	UP
XLOC_026741	CTC-215O4.4	19	10961000	11065395	0.218185	0.648152	1.57078	0.60845	0.99965	UP
XLOC_017572	SCARNA15,SNHG21	15	82750563	82806070	1.23997	3.66027	1.56164	0.02655	0.99965	UP
XLOC_019240	ATP2A1	16	28878404	28939346	0.15026	0.443494	1.56145	0.27305	0.99965	UP
XLOC_006337	RP11-730A19.9	10	13139195	13139533	0.253379	0.747188	1.56017	0.3669	0.99965	UP
XLOC_053576	COL5A1-AS1	9	134641773	134844843	0.768985	2.26632	1.55932	0.57435	0.99965	UP
XLOC_034588	AC006946.12	22	17084953	17115694	0.268831	0.790326	1.55575	0.604	0.99965	UP
XLOC_020115	PKMYT1	16	2963943	2980539	0.170727	0.501266	1.55389	0.08185	0.99965	UP
XLOC_021359	CTC-297N7.7,MYHAS,RP11-799N11.1	17	10383131	10623886	0.227097	0.664479	1.54892	0.0728	0.99965	UP
XLOC_037586	RBP1	3	139389814	139678017	0.259713	0.758746	1.5467	0.1203	0.99965	UP
XLOC_050468	CTD-2530N21.4	8	22245103	22275162	0.75066	2.18186	1.53933	0.5142	0.99965	UP
XLOC_031240	AC006460.2	2	190646745	190708716	0.204051	0.592803	1.53862	0.5637	0.99965	UP
XLOC_042933	RN7SL689P	5	122843438	123054667	0.331148	0.962003	1.53857	0.6056	0.99965	UP
XLOC_027268	CTD-2195B23.3	19	41219202	41261766	1.0808	3.12653	1.53246	0.5989	0.99965	UP
XLOC_038821	RP11-10L12.4	4	102794382	102868896	0.243639	0.703064	1.52891	0.62005	0.99965	UP
XLOC_024186	RP11-178F10.1	18	24426615	24453535	0.375303	1.0827	1.5285	0.6093	0.99965	UP
XLOC_020155	RP11-295D4.3	16	4314760	4425705	0.170912	0.492643	1.52729	0.62865	0.99965	UP
XLOC_009081	OVCH2	11	7689437	7905955	0.357369	1.02835	1.52484	0.06425	0.99965	UP
XLOC_033302	LINC01426	21	34745756	34784886	0.212505	0.610626	1.52279	0.05815	0.99965	UP
XLOC_002353	OBSCN	1	228203505	228378876	0.523561	1.49798	1.51659	0.02505	0.99965	UP
XLOC_011141	RP11-571M6.17	12	57762333	57818704	0.423951	1.21072	1.5139	0.5167	0.99965	UP
XLOC_029167	RP11-65L3.2	2	178521182	179050086	0.160549	0.456689	1.5082	0.42015	0.99965	UP
XLOC_008933	AC068580.5	11	1732409	1764025	0.492488	1.39685	1.50401	0.59395	0.99965	UP
XLOC_017311	TLN2	15	62390525	62884034	0.508378	1.43952	1.50161	0.60535	0.99965	UP
XLOC_012043	TAS2R10	12	10824959	11176020	0.149548	0.423097	1.50038	0.50915	0.99965	UP
XLOC_001988	OCLM	1	186375757	186421378	0.182454	0.514872	1.49668	0.52065	0.99965	UP
XLOC_039470	RP11-539L10.3	4	6670724	6676047	0.181859	0.511905	1.49305	0.511	0.99965	UP
XLOC_028241	RP11-418H16.1	2	65436710	66084639	0.226642	0.637378	1.49173	0.29575	0.99965	UP
XLOC_048662	AC007384.1,KMT2E-AS1	7	105013424	105399308	0.229823	0.646192	1.49144	0.62835	0.99965	UP
XLOC_000536	RP5-997D16.2	1	34712736	34859816	0.236464	0.664495	1.49064	0.514	0.99965	UP
XLOC_039123	RP11-164P12.4,RP11-164P12.5	4	151667223	151670503	0.237316	0.666844	1.49054	0.19095	0.99965	UP
XLOC_012969	RP11-412D9.4	12	106954028	106955497	0.268113	0.752797	1.48942	0.0594	0.99965	UP
XLOC_046384	ANKRD61	7	6009244	6059230	0.320209	0.897718	1.48725	0.62905	0.99965	UP
XLOC_037966	MASP1	3	187217284	187292022	1.41465	3.96537	1.48702	0.0097	0.99965	UP
XLOC_041376	STARD4-AS1	5	111496032	112017309	2.25338	6.27454	1.47742	0.127	0.99965	UP
XLOC_049299	DMTN	8	22048994	22082527	0.156799	0.436277	1.47633	0.0224	0.99965	UP
XLOC_012505	HOXC-AS1	12	53981508	54056030	1.14304	3.17551	1.47412	0.62665	0.99965	UP
XLOC_026581	CTD-2622I13.3	19	4044363	4066945	0.674376	1.87116	1.47231	0.5602	0.99965	UP
XLOC_004284	F11R,RP11-544M22.13,TSTD1	1	160995210	161038990	0.142217	0.394029	1.47021	0.0787	0.99965	UP
XLOC_005796	SNCG	10	86935539	87024732	0.50053	1.3836	1.4669	0.55235	0.99965	UP
XLOC_003906	CH17-13I23.3	1	143419624	143420207	1.62093	4.4719	1.46406	0.28195	0.99965	UP
XLOC_047767	AC093627.12	7	182934	260745	0.535104	1.46676	1.45474	0.64515	0.99965	UP
XLOC_039674	ATP8A1	4	42408372	42657105	0.141355	0.387178	1.45368	0.2062	0.99965	UP
XLOC_039327	C4orf47	4	185426248	185472263	0.182585	0.499887	1.45303	0.2022	0.99965	UP
XLOC_023037	CTD-2349P21.7	17	30709298	30824776	1.00984	2.75459	1.44771	0.49225	0.99965	UP
XLOC_017666	ZNF774	15	90352244	90369146	0.574546	1.56261	1.44346	0.14845	0.99965	UP
XLOC_030580	ANKRD36B	2	97492662	97589965	0.232609	0.631274	1.44036	0.03675	0.99965	UP
XLOC_005478	ANXA8L1,CH17-335B8.4	10	46369086	46537864	0.254064	0.688139	1.43751	0.0435	0.99965	UP
XLOC_002764	NPPB	1	11857463	11858931	2.64642	7.15567	1.43504	0.00705	0.99965	UP
XLOC_011980	POU5F1P3	12	8123631	8221115	0.191526	0.517471	1.43394	0.4527	0.99965	UP
XLOC_020811	CDH8	16	61647241	62037035	0.149124	0.402838	1.43369	0.1617	0.99965	UP
XLOC_005821	ACTA2-AS1	10	88879733	89015785	0.686869	1.85353	1.43217	0.4103	0.99965	UP
XLOC_014322	RP11-93H24.3	13	52651304	52652279	0.215909	0.582517	1.43188	0.16235	0.99965	UP
XLOC_017251	LINC00926	15	57300364	57307769	0.562459	1.517	1.4314	0.0145	0.99965	UP
XLOC_028513	AC092835.2	2	95207534	95259774	0.155664	0.417752	1.42421	0.202	0.99965	UP
XLOC_036868	RP4-613B23.1	3	42547968	42665854	0.444015	1.18985	1.4221	0.51365	0.99965	UP
XLOC_012936	IGF1	12	102120184	102480645	0.685624	1.83512	1.42039	0.29215	0.99965	UP
XLOC_036517	TMEM44-AS1	3	194584010	194672477	0.183288	0.489795	1.41806	0.6016	0.99965	UP
XLOC_010642	RPL13AP20	12	12875498	12876107	0.197133	0.526373	1.41691	0.2972	0.99965	UP
XLOC_021523	CCDC144CP	17	20009343	20403557	0.164099	0.438114	1.41674	0.5133	0.99965	UP
XLOC_050064	KIAA0196-AS1	8	125024259	125367120	0.207433	0.553216	1.4152	0.62645	0.99965	UP
XLOC_033944	AC004471.9	22	19036281	19128449	0.209926	0.559709	1.4148	0.6399	0.99965	UP
XLOC_042328	CTD-2124B8.2	5	37286448	37286977	0.240571	0.639147	1.40968	0.3069	0.99965	UP
XLOC_038110	AC078852.1	4	1347265	1388049	0.241904	0.642589	1.40946	0.4628	0.99965	UP
XLOC_016943	CTD-3092A11.1	15	30470778	30507623	0.358711	0.952445	1.40881	0.3113	0.99965	UP
XLOC_010270	RP11-110I1.11	11	118998141	119030906	0.244713	0.649603	1.40847	0.6072	0.99965	UP
XLOC_003197	ZMYND12	1	42430328	42654664	0.195971	0.52015	1.40828	0.58695	0.99965	UP
XLOC_025249	CTB-50L17.9	19	4402661	4457822	0.507716	1.34682	1.40747	0.65505	0.99965	UP
XLOC_042515	AC025442.3	5	66139970	66183615	0.55445	1.46685	1.4036	0.6109	0.99965	UP
XLOC_021668	CTD-2349P21.9	17	30709298	30824776	0.295009	0.778905	1.40069	0.52605	0.99965	UP
XLOC_037846	ATP5G1P4	3	172828735	172829176	0.317524	0.83621	1.397	0.3069	0.99965	UP
XLOC_026252	ZNF525	19	53330674	53430413	1.09371	2.88028	1.39698	0.33405	0.99965	UP
XLOC_006796	RP11-345K20.2	10	73422258	73422696	0.321023	0.845091	1.39643	0.3069	0.99965	UP
XLOC_044950	RP1-140K8.5	6	3904919	3911979	0.15203	0.399978	1.39557	0.01255	0.99965	UP
XLOC_005359	CCDC7	10	32446139	32882874	0.269191	0.707188	1.39346	0.0749	0.99965	UP
XLOC_029698	AC133528.2	2	241690413	241694289	0.701288	1.84	1.39163	0.17435	0.99965	UP
XLOC_002363	FTH1P2	1	228687414	228687826	0.354914	0.930758	1.39094	0.3069	0.99965	UP
XLOC_013441	LINC00545	13	30881932	30977623	0.356387	0.934503	1.39076	0.54575	0.99965	UP
XLOC_026794	CACNA1A	19	13206441	13623990	0.177671	0.465795	1.39048	0.132	0.99965	UP
XLOC_031568	RP11-690I21.1	2	231732424	231809254	0.362266	0.94926	1.38975	0.61605	0.99965	UP
XLOC_036990	TRAIP	3	49828598	49856574	0.398825	1.04222	1.38583	0.0803	0.99965	UP
XLOC_035689	RP11-803B1.8	3	75435347	75491202	0.198133	0.51771	1.38568	0.19785	0.99965	UP
XLOC_045658	OOEP	6	73368554	73452276	0.1577	0.412061	1.38567	0.3896	0.99965	UP
XLOC_007243	LINC00601	10	126413868	126421879	0.348649	0.909261	1.38292	0.07445	0.99965	UP
XLOC_059114	IDSP1	X	149476989	149550510	0.415672	1.08298	1.38148	0.63275	0.99965	UP
XLOC_025190	CTB-31O20.9	19	1874870	1876169	0.526079	1.36247	1.37288	0.19995	0.99965	UP
XLOC_015407	FOXN3-AS1	14	89124870	89954777	0.287619	0.740064	1.36349	0.6603	0.99965	UP
XLOC_040116	CFI	4	109740693	109802179	1.15976	2.98356	1.36321	0.0068	0.99965	UP
XLOC_053136	RP11-82L18.2	9	89005770	89178767	0.834724	2.14637	1.36253	0.2826	0.99965	UP
XLOC_039210	RP11-218F10.3	4	163524297	164384050	0.172145	0.441975	1.36034	0.4813	0.99965	UP
XLOC_017324	FBXL22	15	63504510	63602428	0.218111	0.559985	1.36033	0.47075	0.99965	UP
XLOC_018891	RP11-304L19.4	16	2039814	2135898	0.752775	1.92955	1.35797	0.64465	0.99965	UP
XLOC_014243	ERICH6B	13	45464897	45615739	0.296379	0.753678	1.34651	0.68255	0.99965	UP
XLOC_012099	MGP	12	14803571	14906586	0.201975	0.512062	1.34214	0.38435	0.99965	UP
XLOC_031527	AC097662.2	2	227164564	227357836	0.418698	1.06087	1.34126	0.45375	0.99965	UP
XLOC_027108	CTD-2553L13.10	19	34733297	34733837	0.350245	0.886938	1.34047	0.231	0.99965	UP
XLOC_038154	STX18-AS1	4	4348139	4710938	0.225932	0.571889	1.33984	0.4336	0.99965	UP
XLOC_047385	SMKR1	7	129502478	129512932	0.201003	0.508091	1.33787	0.2767	0.99965	UP
XLOC_059955	LL0XNC01-240C2.1	X	104062541	104063037	0.396936	1.00158	1.33531	0.231	0.99965	UP
XLOC_042954	RP11-517I3.1	5	126360131	126498604	0.30969	0.771627	1.31708	0.6308	0.99965	UP
XLOC_011964	CD163,CD163L1	12	7346684	7503893	0.347239	0.862674	1.31289	0.1524	0.99965	UP
XLOC_005590	LINC01515	10	65570337	65768835	0.806304	2.00237	1.31231	0.01095	0.99965	UP
XLOC_019770	RP11-384M15.3	16	72044288	72176878	0.644879	1.5973	1.30853	0.65785	0.99965	UP
XLOC_010565	RP11-266K4.9	12	8232511	8242948	0.387639	0.95843	1.30596	0.2483	0.99965	UP
XLOC_027659	CTD-2105E13.14	19	55282071	55312533	0.678039	1.67567	1.30529	0.5201	0.99965	UP
XLOC_023405	ARHGAP27	17	45393901	45434421	0.238623	0.589642	1.3051	0.1568	0.99965	UP
XLOC_046695	AC073115.7	7	45990904	46000898	0.477199	1.17753	1.3031	0.3294	0.99965	UP
XLOC_000134	RP3-510D11.2	1	9182006	9202619	0.266591	0.657708	1.30282	0.18645	0.99965	UP
XLOC_022581	RP1-59D14.5	17	2054153	2381058	0.385297	0.949808	1.30166	0.57515	0.99965	UP
XLOC_011253	RP11-785D18.3	12	70468079	70637440	0.570745	1.40082	1.29536	0.4824	0.99965	UP
XLOC_011670	PXN-AS1	12	120201290	120265771	0.414961	1.01588	1.29168	0.4522	0.99965	UP
XLOC_005808	CFL1P1	10	87751511	87845612	0.924306	2.26233	1.29137	0.59505	0.99965	UP
XLOC_018580	GOLGA6L10	15	82339997	82349475	0.232064	0.565023	1.28378	0.1024	0.99965	UP
XLOC_038983	RP11-420A23.1	4	128292750	128519394	0.703786	1.70671	1.27801	0.1564	0.99965	UP
XLOC_044890	XXyac-YX65C7_A.2	6	169213253	169254044	0.375531	0.91028	1.27738	0.6529	0.99965	UP
XLOC_011680	CABP1	12	120629610	120667324	0.161286	0.390926	1.27727	0.1638	0.99965	UP
XLOC_002611	HES4	1	998961	1000172	0.430655	1.04288	1.27597	0.1115	0.99965	UP
XLOC_005631	TSPAN15	10	69451472	69507669	0.443228	1.0692	1.2704	0.09855	0.99965	UP
XLOC_022990	AC010761.10	17	28743983	28750958	2.14439	5.17063	1.26977	0.53305	0.99965	UP
XLOC_009170	PLEKHA7	11	16778294	17053024	0.235832	0.566099	1.26329	0.1775	0.99965	UP
XLOC_032340	UCKL1-AS1	20	63939828	64049641	0.508383	1.2069	1.24732	0.1917	0.99965	UP
XLOC_015348	SAMD15	14	77335020	77391497	0.165056	0.391184	1.24489	0.69365	0.99965	UP
XLOC_006860	RP11-119F19.4	10	79660890	79827602	1.07811	2.54889	1.24136	0.4518	0.99965	UP
XLOC_029432	AC093850.2	2	215530446	215843722	1.99304	4.70834	1.24025	0.10295	0.99965	UP
XLOC_042397	RP11-53O19.1	5	44744899	44808777	0.289149	0.682635	1.2393	0.27635	0.99965	UP
XLOC_058034	LINC00106	X	1396426	1399402	1.11645	2.61486	1.22781	0.18585	0.99965	UP
XLOC_009946	DLG2	11	83455011	85627922	0.267569	0.626519	1.22745	0.04125	0.99965	UP
XLOC_009848	LIPT2	11	74491711	74669117	0.214279	0.500237	1.22312	0.53925	0.99965	UP
XLOC_001223	RP5-1074L1.4	1	110347115	110443817	0.227789	0.531455	1.22225	0.5039	0.99965	UP
XLOC_030610	RNF149	2	101271218	101308701	16.9437	39.4202	1.21819	0.26105	0.99965	UP
XLOC_048644	RASA4DP	7	102681835	102690469	0.211367	0.490137	1.21344	0.19955	0.99965	UP
XLOC_028911	DARS-AS1	2	135906676	136022593	0.705556	1.63543	1.21283	0.1288	0.99965	UP
XLOC_021688	RP1-41C23.4	17	31560131	31560573	2.05643	4.76166	1.21132	0.06935	0.99965	UP
XLOC_021901	HSD17B1P1	17	42536171	42566277	0.166054	0.383868	1.20896	0.66275	0.99965	UP
XLOC_026458	CTD-2619J13.5	19	58345177	58366591	0.344743	0.796587	1.20831	0.483	0.99965	UP
XLOC_025413	ZNF69	19	11887783	11914329	0.553892	1.27757	1.20573	0.0442	0.99965	UP
XLOC_049827	LRRC69,SLC26A7	8	91101831	91398152	0.200885	0.463236	1.20538	0.20155	0.99965	UP
XLOC_013831	DOCK9-AS2	13	99087818	99088625	0.204369	0.471055	1.20472	0.2994	0.99965	UP
XLOC_007126	PDCD4-AS1	10	110869742	110919274	0.428149	0.986029	1.20352	0.5986	0.99965	UP
XLOC_031346	AC007362.3	2	205681989	205798133	1.3218	3.04134	1.2022	0.358	0.99965	UP
XLOC_016066	LINC00519	14	51304415	51328386	0.338495	0.777217	1.19918	0.2459	0.99965	UP
XLOC_033960	AC000078.5	22	19875516	20016808	0.169247	0.388608	1.19918	0.6477	0.99965	UP
XLOC_048681	AC002467.7	7	107742816	107761667	0.444659	1.01996	1.19774	0.6071	0.99965	UP
XLOC_060225	RANP4	X	136807222	136807877	0.357182	0.819237	1.19762	0.2459	0.99965	UP
XLOC_020792	RP11-481J2.3	16	58295079	58406144	0.178594	0.409621	1.19761	0.52005	0.99965	UP
XLOC_018794	RP11-89K11.1	15	101737098	101745710	0.285424	0.653697	1.19551	0.26475	0.99965	UP
XLOC_016803	MKRN3	15	23565677	23630075	0.255902	0.585882	1.19502	0.10825	0.99965	UP
XLOC_042302	RP11-1023L17.1	5	34164697	34244796	0.521812	1.19465	1.19499	0.09945	0.99965	UP
XLOC_021399	RP11-640I15.1	17	15565482	15684311	0.539067	1.23112	1.19144	0.4925	0.99965	UP
XLOC_046488	AC002480.4	7	22419443	22665533	0.446692	1.01929	1.19021	0.56455	0.99965	UP
XLOC_048888	AC078842.3	7	137344929	137354483	0.225654	0.514754	1.18977	0.3735	0.99965	UP
XLOC_020331	MIR3179-3	16	18411308	18411851	0.463278	1.05608	1.18877	0.24885	0.99965	UP
XLOC_048829	RP11-286H14.8	7	129188871	129213545	0.35499	0.808764	1.18794	0.3978	0.99965	UP
XLOC_020410	RP11-266L9.8	16	25085591	25111555	0.237305	0.540601	1.18782	0.38765	0.99965	UP
XLOC_023882	CTD-2047H16.5	17	80260865	80438086	0.363863	0.828421	1.18697	0.67375	0.99965	UP
XLOC_018951	LA16c-360H6.1	16	3263742	3318852	0.243283	0.553776	1.18667	0.6343	0.99965	UP
XLOC_026173	C19orf81	19	50621306	50719450	0.421179	0.954713	1.18064	0.65535	0.99965	UP
XLOC_034373	RP3-508I15.21	22	38705722	38794198	0.269246	0.610014	1.17992	0.65025	0.99965	UP
XLOC_042374	SEPP1	5	42756800	42887392	0.177501	0.401412	1.17726	0.10915	0.99965	UP
XLOC_017521	CHRNA5	15	78565519	78621295	0.218847	0.494665	1.17653	0.294	0.99965	UP
XLOC_013609	INTS6-AS1,RPS4XP16	13	51335772	51552364	0.66874	1.50984	1.17487	0.083	0.99965	UP
XLOC_039684	RP11-700J17.1	4	44622064	44726595	0.317524	0.716751	1.17461	0.65305	0.99965	UP
XLOC_012095	AC010168.1	12	14774382	14778002	39.8058	89.8474	1.1745	0.4424	0.99965	UP
XLOC_019217	IL21R	16	27402161	27453393	0.202639	0.457073	1.17351	0.29295	0.99965	UP
XLOC_000097	RNF207	1	6181268	6235972	2.07351	4.67687	1.17347	0.27905	0.99965	UP
XLOC_015319	ZC2HC1C	14	75053220	75176631	0.314006	0.708247	1.17346	0.4656	0.99965	UP
XLOC_010123	KBTBD3	11	106051097	106101975	0.864468	1.94813	1.17221	0.4383	0.99965	UP
XLOC_046962	GTF2IRD2B	7	75092572	75149817	0.683963	1.54029	1.17121	0.1023	0.99965	UP
XLOC_043178	RP11-394O4.6	5	149406688	149428678	0.341068	0.767857	1.17078	0.50055	0.99965	UP
XLOC_052576	RFX3	9	3218296	3526004	0.366277	0.823462	1.16877	0.09655	0.99965	UP
XLOC_044768	RP1-292B18.1	6	150865548	151228447	0.182656	0.410173	1.1671	0.61935	0.99965	UP
XLOC_001385	PFN1P3	1	145407771	145408173	0.184964	0.415076	1.16613	0.4409	0.99965	UP
XLOC_025018	BCL2	18	63123345	63320128	0.181539	0.407033	1.16486	0.2181	0.99965	UP
XLOC_018324	RP11-244F12.3	15	63042631	63071915	3.71292	8.30726	1.16182	0.70285	0.99965	UP
XLOC_008891	RP11-326C3.16	11	215457	252984	0.398577	0.891643	1.16161	0.6624	0.99965	UP
XLOC_034885	APOL3	22	36140329	36166177	1.03729	2.31905	1.16071	0.02085	0.99965	UP
XLOC_029626	SPP2	2	234050678	234077134	0.202983	0.453712	1.16042	0.40675	0.99965	UP
XLOC_059230	PPP2R3B	X	333962	386955	1.91159	4.26796	1.15878	0.0384	0.99965	UP
XLOC_009241	BBOX1-AS1	11	27040724	27220113	0.35039	0.781454	1.1572	0.23075	0.99965	UP
XLOC_006702	RTKN2	10	62183034	62268707	0.275724	0.614242	1.15558	0.02415	0.99965	UP
XLOC_024751	RP11-627G18.2	18	22169442	22205229	1.35608	3.0162	1.15329	0.6488	0.99965	UP
XLOC_007512	TMEM9B-AS1	11	8947293	8977527	0.689128	1.53255	1.15309	0.56695	0.99965	UP
XLOC_037035	TNNC1	3	52451101	52454070	0.573575	1.27221	1.14928	0.2538	0.99965	UP
XLOC_006594	FAM21FP	10	45706430	45792961	0.17471	0.387308	1.14851	0.53725	0.99965	UP
XLOC_027945	AGBL5-IT1	2	27042363	27071773	0.252058	0.557367	1.14487	0.6141	0.99965	UP
XLOC_042944	ZNF608	5	124636912	124748807	0.189862	0.419578	1.14399	0.21095	0.99965	UP
XLOC_018902	MIR940,RP11-304L19.13	16	2253115	2273418	0.777189	1.71476	1.14167	0.5574	0.99965	UP
XLOC_022692	RP11-104H15.9	17	7420102	7457707	0.270479	0.596188	1.14025	0.56205	0.99965	UP
XLOC_032713	RPL36P4	20	35542020	35557634	0.572799	1.2581	1.13514	0.6608	0.99965	UP
XLOC_014123	N4BP2L2-IT2	13	32400722	32538885	0.184887	0.403275	1.12512	0.4895	0.99965	UP
XLOC_008197	RN7SKP239	11	67317870	67425607	0.336071	0.731946	1.12297	0.6222	0.99965	UP
XLOC_016107	RP11-454L9.2	14	55366391	55411858	0.338516	0.736937	1.12232	0.59055	0.99965	UP
XLOC_016508	RP11-123M6.2	14	100779409	100861031	1.4072	3.05711	1.11934	0.6892	0.99965	UP
XLOC_051724	RP11-613M10.6	9	37509149	37510299	0.703601	1.5283	1.1191	0.3839	0.99965	UP
XLOC_025832	ARHGAP33	19	35774531	35788822	0.622358	1.35073	1.11793	0.0533	0.99965	UP
XLOC_021278	Metazoa_SRP	17	6444414	6556494	0.37223	0.80579	1.11421	0.49215	0.99965	UP
XLOC_033195	NCAM2	21	20998314	21543329	0.639858	1.38466	1.11371	0.2119	0.99965	UP
XLOC_027955	AC074117.10	2	27325848	27370486	0.950663	2.0545	1.11178	0.3509	0.99965	UP
XLOC_022239	SNHG25,SNORA50	17	64145969	64146476	0.769677	1.66303	1.11149	0.3405	0.99965	UP
XLOC_041709	CTC-327F10.4	5	147870681	147906538	0.613557	1.3251	1.11083	0.54275	0.99965	UP
XLOC_048325	Metazoa_SRP	7	66915062	66915334	0.405461	0.873363	1.10702	0.44105	0.99965	UP
XLOC_035494	Metazoa_SRP	3	49268601	49340712	0.416575	0.895889	1.10474	0.6136	0.99965	UP
XLOC_041658	AC005618.6	5	141326209	141329357	0.331446	0.712489	1.10409	0.11585	0.99965	UP
XLOC_011130	KIF5A	12	57549997	57586632	0.202739	0.435056	1.10158	0.07455	0.99965	UP
XLOC_032632	MLLT10P1	20	30403122	30403384	0.44485	0.952917	1.09903	0.44105	0.99965	UP
XLOC_000306	CDA	1	20588947	20618908	0.36633	0.783285	1.0964	0.21435	0.99965	UP
XLOC_048000	ZNRF2P2	7	29598794	29742594	0.351433	0.750419	1.09444	0.3365	0.99965	UP
XLOC_019686	PARD6A	16	67660945	67662778	0.347604	0.740904	1.09184	0.1334	0.99965	UP
XLOC_005581	JMJD1C-AS1	10	63167220	63466563	0.29885	0.635973	1.08954	0.31095	0.99965	UP
XLOC_051270	RNF139-AS1	8	124462484	124474576	0.306925	0.652807	1.08877	0.13345	0.99965	UP
XLOC_021960	DBF4B	17	44708607	44752264	0.325215	0.691513	1.08836	0.14965	0.99965	UP
XLOC_050505	RP11-395I14.2	8	25425520	25426580	0.603089	1.28173	1.08764	0.23735	0.99965	UP
XLOC_043233	SAP30L-AS1	5	153990127	154445850	2.31207	4.90694	1.08564	0.74485	0.99965	UP
XLOC_026946	CTC-559E9.5	19	19757365	19834927	0.23135	0.489986	1.08266	0.30965	0.99965	UP
XLOC_052893	CBWD7	9	40992248	41217197	1.68494	3.56472	1.08109	0.2102	0.99965	UP
XLOC_011936	SCNN1A	12	6346842	6391571	0.333213	0.704924	1.08103	0.24795	0.99965	UP
XLOC_030885	ZRANB3	2	135052264	135531236	1.05715	2.2343	1.07964	0.48415	0.99965	UP
XLOC_026951	ZNF682	19	19997057	20039506	0.568868	1.20128	1.07841	0.0978	0.99965	UP
XLOC_019093	NPIPA7	16	16379054	16393954	0.412316	0.870181	1.07756	0.11615	0.99965	UP
XLOC_035346	C3orf35	3	37386268	37435497	0.196495	0.414424	1.07661	0.19265	0.99965	UP
XLOC_035360	ACVR2B	3	38451026	38493142	0.300328	0.632789	1.07518	0.0495	0.99965	UP
XLOC_038446	NIPAL1	4	47847232	48040173	0.183978	0.38759	1.07499	0.57525	0.99965	UP
XLOC_026643	CTD-3128G10.6	19	6737924	6751526	0.3359	0.707084	1.07385	0.61445	0.99965	UP
XLOC_008252	RP11-660L16.2	11	71428192	71452868	0.339812	0.715166	1.07354	0.5307	0.99965	UP
XLOC_028542	CNNM3	2	96816244	96858095	2.62398	5.51839	1.07249	0.0643	0.99965	UP
XLOC_024550	AC139100.3	18	80147923	80247546	0.257017	0.540272	1.07182	0.29585	0.99965	UP
XLOC_046335	GPR146	7	996985	1138260	0.740951	1.55558	1.07	0.55705	0.99965	UP
XLOC_012946	RP11-341G23.4	12	103587272	103768858	0.741307	1.55599	1.06969	0.1767	0.99965	UP
XLOC_023011	CORO6	17	29560546	30186475	1.19212	2.50073	1.06882	0.44275	0.99965	UP
XLOC_021526	USP32P3	17	20415546	20431008	0.735178	1.5402	1.06695	0.07495	0.99965	UP
XLOC_028551	ANKRD36	2	97113495	97264521	0.248244	0.52006	1.06692	0.14005	0.99965	UP
XLOC_027637	LENG8-AS1	19	54444812	54463711	0.423664	0.887012	1.06603	0.5655	0.99965	UP
XLOC_031009	CCDC148	2	158166649	158456753	0.220882	0.461425	1.06282	0.1767	0.99965	UP
XLOC_048541	DLX6-AS1,Evf-2_5p	7	96955140	97014066	0.297353	0.620849	1.06206	0.3012	0.99965	UP
XLOC_019985	VPS9D1-AS1	16	89707133	89816657	0.297283	0.618966	1.05802	0.63325	0.99965	UP
XLOC_047157	PVRIG,STAG3	7	100177562	100272218	1.03408	2.15043	1.05627	0.0725	0.99965	UP
XLOC_003201	RP5-994D16.9	1	42767268	42798230	0.549214	1.142	1.05612	0.52005	0.99965	UP
XLOC_020985	LDHD	16	75111859	75116771	0.218874	0.451818	1.04564	0.1517	0.99965	UP
XLOC_028695	AC108463.1	2	111195962	111637967	0.709828	1.46262	1.04301	0.5875	0.99965	UP
XLOC_027697	ZNF582	19	56219669	56393545	0.797942	1.64175	1.04088	0.3284	0.99965	UP
XLOC_048122	GCK	7	44144270	44198170	0.268397	0.551958	1.04019	0.18645	0.99965	UP
XLOC_021104	FOXC2-AS1	16	86565144	86569728	1.42201	2.91758	1.03684	0.60975	0.99965	UP
XLOC_038114	RP11-572O17.1	4	1712820	1713622	0.411951	0.843909	1.03462	0.2236	0.99965	UP
XLOC_036403	MCCC1-AS1	3	183015217	183116075	0.218716	0.447573	1.03307	0.50735	0.99965	UP
XLOC_018416	UACA	15	70654553	70763593	24.0204	49.0802	1.03088	0.00535	0.99965	UP
XLOC_005639	CALM2P2	10	70147288	70170523	1.11539	2.27769	1.03003	0.706	0.99965	UP
XLOC_006930	ACTA2	10	88879733	89015785	120.146	245.3	1.02976	0.00145	0.52292	UP
XLOC_001875	GAS5-AS1	1	173863247	173903549	0.248143	0.506598	1.02967	0.66795	0.99965	UP
XLOC_019909	RP11-568J23.5	16	85771757	85807044	0.250473	0.511345	1.02964	0.6785	0.99965	UP
XLOC_043149	PLAC8L1	5	146084385	146182660	0.555157	1.13089	1.02649	0.7192	0.99965	UP
XLOC_017280	RP11-59H7.3	15	59105077	59523549	0.280508	0.571395	1.02645	0.6834	0.99965	UP
XLOC_003965	PFN1P8	1	146938743	146996202	0.694917	1.40811	1.01885	0.562	0.99965	UP
XLOC_029602	EFHD1	2	232547967	232682781	0.461346	0.932248	1.01486	0.545	0.99965	UP
XLOC_001747	RP11-359K18.4	1	162561505	162599842	0.3864	0.780627	1.01454	0.685	0.99965	UP
XLOC_007324	RASSF7	11	537526	564021	3.04611	6.12666	1.00813	0.01485	0.99965	UP
XLOC_026987	ZNF100	19	21722765	21767628	0.679267	1.3652	1.00706	0.1159	0.99965	UP
XLOC_027471	SLC6A16	19	49289637	49325225	0.383017	0.769242	1.00603	0.3448	0.99965	UP
XLOC_021669	CTD-2349P21.12	17	30709298	30824776	0.50764	1.01618	1.00128	0.5402	0.99965	UP

## Sheet: Down_Regulated
Cuffmerge Gene ID	Gene Name	Chromosome	Gene Start (bp)	Gene End (bp)	FPKM 1	FPKM 3	log2(fold_change)	P_value	Q_value	Regulation
XLOC_000058	MMP23B	1	1632094	1745992	0.438692	0.213236	-1.04076	0.30715	0.99965	Down
XLOC_000077	PRDM16	1	3069167	3438621	1.90253	0.828789	-1.19885	0.06315	0.99965	Down
XLOC_000114	RP3-467L1.6	1	7771268	7781432	0.576844	0.1436	-2.00612	0.50605	0.99965	Down
XLOC_000244	ARHGEF19-AS1	1	16197853	16212609	0.799621	0.240603	-1.73266	0.45745	0.99965	Down
XLOC_000591	OXCT2P1	1	39491645	39558707	0.446578	0.173016	-1.36801	0.2922	0.99965	Down
XLOC_000774	RP11-155O18.6	1	52142093	52366193	0.969931	0.289652	-1.74356	0.5814	0.99965	Down
XLOC_000897	PDE4B	1	65792513	66374579	6.79171	3.08392	-1.13901	0.0073	0.99965	Down
XLOC_000900	TCTEX1D1	1	66752458	66778787	1.13541	0.118278	-3.26296	0.01015	0.99965	Down
XLOC_001083	RP5-1033H22.2	1	93561785	93847150	0.5065	0.195864	-1.37071	0.47025	0.99965	Down
XLOC_001111	DPYD-AS1	1	97077742	97921049	0.554134	0.0903389	-2.61682	0.2622	0.99965	Down
XLOC_001152	S1PR1	1	101236887	101241518	2.36129	1.13919	-1.05157	0.01135	0.99965	Down
XLOC_001177	NTNG1	1	107140006	107483458	0.758085	0.287797	-1.39731	0.029	0.99965	Down
XLOC_001198	SCARNA2	1	109100192	109100619	1.20307	0.257826	-2.22225	0.1432	0.99965	Down
XLOC_001340	LINC00623	1	120913150	121052167	0.812932	0.309568	-1.39288	0.2007	0.99965	Down
XLOC_001396	RP11-458D21.1	1	146052565	146061948	1.26135	0.604678	-1.06074	0.0574	0.99965	Down
XLOC_001463	RP11-196G18.24	1	149842187	149886652	2.24813	0.859961	-1.38639	0.29425	0.99965	Down
XLOC_001490	RP11-316M1.3	1	150926262	150975534	0.431988	0.16059	-1.42761	0.58995	0.99965	Down
XLOC_001517	OAZ3	1	151755540	151794402	1.83814	0.797842	-1.20407	0.3318	0.99965	Down
XLOC_001518	RP11-98D18.9	1	151755540	151794402	0.550767	0.20382	-1.43415	0.62295	0.99965	Down
XLOC_001604	AC234582.1	1	155169407	155192916	1.58446	0.692464	-1.19418	0.6668	0.99965	Down
XLOC_001628	SEMA4A	1	156147365	156177752	0.662564	0.123757	-2.42055	0.00475	0.99965	Down
XLOC_001723	FCER1G	1	161215233	161220699	0.513705	0.234915	-1.1288	0.31435	0.99965	Down
XLOC_001734	FCRLB	1	161721562	161728143	0.888562	0.312127	-1.50934	0.0165	0.99965	Down
XLOC_001846	FMO4	1	171314207	171342084	1.61991	0.766764	-1.07906	0.1114	0.99965	Down
XLOC_001960	NPL	1	182789292	182830384	0.648486	0.238705	-1.44185	0.12125	0.99965	Down
XLOC_001976	SWT1	1	185157079	185291765	1.24545	0.611623	-1.02595	0.0776	0.99965	Down
XLOC_002118	PRELP	1	203475827	203491352	0.438191	0.20122	-1.12279	0.03765	0.99965	Down
XLOC_002170	IL24	1	206897442	206904139	0.48029	0.0930615	-2.36765	0.0607	0.99965	Down
XLOC_002230	ATF3	1	212565333	212620777	5.8526	2.44961	-1.25653	0.00695	0.99965	Down
XLOC_002235	RP11-348H3.2	1	212824026	212824505	0.418488	0.105423	-1.98899	0.1759	0.99965	Down
XLOC_002292	DISP1	1	222815021	223005995	17.7806	3.7556	-2.24319	0.09535	0.99965	Down
XLOC_002315	RP11-145A3.1	1	225700603	225752243	0.736353	0.34729	-1.08426	0.1166	0.99965	Down
XLOC_002622	RP5-902P8.12	1	1249776	1251334	0.4392	0.170178	-1.36783	0.1311	0.99965	Down
XLOC_002830	FAM131C	1	16057768	16073632	0.885379	0.354361	-1.32108	0.0475	0.99965	Down
XLOC_002847	EIF1AXP1	1	16681096	16720157	1.7853	0.73214	-1.28598	0.17655	0.99965	Down
XLOC_002887	SH2D5	1	20719731	20732837	1.69328	0.750505	-1.17388	0.0233	0.99965	Down
XLOC_002895	NBPF2P	1	21424624	21427967	0.52928	0.202378	-1.38698	0.28215	0.99965	Down
XLOC_002950	RP3-465N24.5	1	25242236	25430192	0.447093	0.112436	-1.99147	0.53155	0.99965	Down
XLOC_002997	AL109927.1	1	27830777	27851676	11.6906	3.87568	-1.59283	0.5853	0.99965	Down
XLOC_003045	FABP3	1	31365624	31376850	4.29632	2.0957	-1.03567	0.04245	0.99965	Down
XLOC_003128	LINC01137	1	37454878	37474411	0.532979	0.247576	-1.10621	0.182	0.99965	Down
XLOC_003291	SKINTL	1	48096091	48182428	1.05073	0.354775	-1.56642	0.12005	0.99965	Down
XLOC_003532	RP11-181C21.4	1	77779623	77879539	0.404863	0.178185	-1.18406	0.65935	0.99965	Down
XLOC_003535	RP11-386I14.4	1	77979174	78138449	3.45629	0.594001	-2.54068	0.4794	0.99965	Down
XLOC_003663	F3	1	94529224	94541800	1.05704	0.319921	-1.72425	0.01195	0.99965	Down
XLOC_003812	BCL2L15	1	113761831	113914086	0.651672	0.0614278	-3.40718	0.1298	0.99965	Down
XLOC_004036	CTSS	1	150730195	150765957	1.59409	0.66064	-1.2708	0.1019	0.99965	Down
XLOC_004353	GCSHP5	1	167916728	168075843	0.858552	0.279175	-1.62074	0.5932	0.99965	Down
XLOC_004497	RP11-181K3.4	1	183023459	183145592	0.55806	0.105423	-2.40423	0.46555	0.99965	Down
XLOC_004579	RP11-553K8.5	1	198638670	198757283	1.39697	0.130924	-3.4155	0.2563	0.99965	Down
XLOC_004632	MYBPH	1	203167810	203175813	0.426302	0.165364	-1.36623	0.10815	0.99965	Down
XLOC_004746	FLVCR1-AS1	1	212852107	212858088	0.553442	0.210313	-1.39589	0.21755	0.99965	Down
XLOC_004892	RNA5S9	1	228628147	228628266	50.784	16.004	-1.66594	0.2253	0.99965	Down
XLOC_004955	RP11-443B7.1	1	234957230	234970062	0.729473	0.251238	-1.5378	0.194	0.99965	Down
XLOC_005017	PLD5	1	242082985	242524696	3.37512	1.61612	-1.06241	0.03095	0.99965	Down
XLOC_005218	MEIG1	10	14959438	14988050	0.439769	0.189201	-1.21683	0.31855	0.99965	Down
XLOC_005361	RP11-462L8.1	10	32900318	33082102	0.392619	0.117069	-1.74577	0.5232	0.99965	Down
XLOC_005408	RP11-291L22.7	10	38448688	38448949	0.898369	0.320548	-1.48677	0.276	0.99965	Down
XLOC_005681	RP11-537A6.9	10	73375100	73414076	0.557406	0.139184	-2.00173	0.50795	0.99965	Down
XLOC_005863	HHEX	10	92689950	92695646	1.4131	0.652931	-1.11386	0.03375	0.99965	Down
XLOC_005864	EXOC6	10	92834712	93059493	2.76119	0.840245	-1.71641	0.1377	0.99965	Down
XLOC_006000	RP11-127L20.5	10	104309697	104338404	5.36931	1.89549	-1.50217	0.64945	0.99965	Down
XLOC_006049	RP11-57H14.3	10	112888734	112906111	0.875707	0.213591	-2.0356	0.1478	0.99965	Down
XLOC_006089	CASC2	10	118004915	118210153	1.21177	0.468728	-1.3703	0.52035	0.99965	Down
XLOC_006112	LINC01561	10	120597948	120600124	1.90532	0.884472	-1.10714	0.01855	0.99965	Down
XLOC_006178	RP11-234G16.4	10	129835282	129963841	8.37755	3.79276	-1.14328	0.52435	0.99965	Down
XLOC_006271	AKR1C2	10	4922563	5135226	11.0984	5.43701	-1.02947	0.1485	0.99965	Down
XLOC_006282	RP13-463N16.6	10	5594990	5596118	1.15127	0.188921	-2.60737	0.08905	0.99965	Down
XLOC_006330	RP11-186N15.3	10	12129636	12250589	0.757772	0.307805	-1.29975	0.64625	0.99965	Down
XLOC_006401	SKIDA1	10	21513477	21525682	0.454678	0.116921	-1.95931	0.14315	0.99965	Down
XLOC_006528	NAMPTP1	10	36521720	36524234	0.502165	0.231302	-1.11838	0.09665	0.99965	Down
XLOC_006767	UNC5B-AS1	10	71212569	71302864	1.56671	0.525228	-1.57672	0.61395	0.99965	Down
XLOC_006789	RP11-152N13.16	10	73110374	73358859	0.48503	0.214747	-1.17543	0.6232	0.99965	Down
XLOC_006973	RBP4	10	93566664	93604480	4.2914	1.69881	-1.33692	0.0123	0.99965	Down
XLOC_007012	FRAT2	10	97332496	97343203	1.13067	0.546855	-1.04795	0.0501	0.99965	Down
XLOC_007045	SNORA12	10	100229666	100267680	13.6346	5.87462	-1.2147	0.5405	0.99965	Down
XLOC_007101	RN7SL524P	10	103967200	104029233	0.972044	0.471687	-1.04319	0.6448	0.99965	Down
XLOC_007215	CPXM2	10	123706206	123940267	2.69992	1.18382	-1.18947	0.0018	0.59144	Down
XLOC_007539	RP11-567I13.1	11	11270875	11622005	0.510103	0.155538	-1.71352	0.47785	0.99965	Down
XLOC_007547	MICALCL	11	12276079	12359144	0.519585	0.222105	-1.22612	0.21165	0.99965	Down
XLOC_007609	SPTY2D1-AS1	11	18599786	18634791	0.849862	0.194219	-2.12954	0.49655	0.99965	Down
XLOC_007721	EHF	11	34621092	34661057	0.391034	0.0970749	-2.01012	0.04155	0.99965	Down
XLOC_007980	AP001350.4	11	58627434	58628528	0.564673	0.145328	-1.9581	0.1126	0.99965	Down
XLOC_008000	AP000442.1	11	59616428	59668980	0.637376	0.233598	-1.44812	0.6131	0.99965	Down
XLOC_008057	ASRGL1	11	62336910	62393412	0.511879	0.224605	-1.18841	0.19685	0.99965	Down
XLOC_008094	FERMT3	11	64206677	64234352	0.694438	0.252824	-1.45771	0.3094	0.99965	Down
XLOC_008233	RP11-211G23.2	11	69371462	69372511	0.638541	0.316497	-1.01259	0.4405	0.99965	Down
XLOC_008325	RP11-702H23.6	11	74330317	74486051	0.492877	0.150392	-1.7125	0.5686	0.99965	Down
XLOC_008509	SCARNA9,snoU2-30	11	93661638	93814695	1.39937	0.518062	-1.43358	0.6091	0.99965	Down
XLOC_008567	BIRC3	11	102317449	102339403	2.50608	1.15298	-1.12006	0.00275	0.7393	Down
XLOC_008677	BACE1-AS	11	117232624	117413268	2.00283	0.992384	-1.01307	0.7389	0.99965	Down
XLOC_009078	CTD-2516F10.2	11	7238777	7512515	0.442802	0.137533	-1.68689	0.0788	0.99965	Down
XLOC_009118	RP11-351I24.3	11	9754769	10294207	2.6352	0.603266	-2.12705	0.52905	0.99965	Down
XLOC_009127	CTD-2003C8.2	11	10809296	10906802	0.494293	0.123856	-1.9967	0.56585	0.99965	Down
XLOC_009216	NAV2-AS2	11	19350723	20121598	0.779775	0.381001	-1.03326	0.508	0.99965	Down
XLOC_009229	SVIP	11	22813798	22945393	2.13034	0.881552	-1.27296	0.1076	0.99965	Down
XLOC_009350	RP11-618K13.2	11	45885650	45906465	1.43716	0.672694	-1.09519	0.5099	0.99965	Down
XLOC_009531	GLYATL2	11	58834064	58904215	0.545143	0.26014	-1.06735	0.18225	0.99965	Down
XLOC_009573	VWCE	11	61258285	61295424	2.48274	1.24124	-1.00015	0.10165	0.99965	Down
XLOC_009577	RP11-286N22.6	11	61402640	61490931	0.429314	0.188816	-1.18505	0.6784	0.99965	Down
XLOC_009673	AP003068.23	11	65177605	65212006	0.569692	0.226327	-1.33177	0.62725	0.99965	Down
XLOC_009759	RP5-901A4.1	11	68008577	68030461	0.609652	0.23376	-1.38296	0.5165	0.99965	Down
XLOC_009876	RP11-535A19.1,RP11-535A19.2	11	75758454	76143195	0.516329	0.226387	-1.1895	0.4418	0.99965	Down
XLOC_009980	RAB38	11	88098590	88175467	0.705963	0.338492	-1.06047	0.1237	0.99965	Down
XLOC_010088	MMP1	11	102746967	102843803	5.85809	1.95424	-1.58383	0.00035	0.235232	Down
XLOC_010090	MMP3	11	102746967	102843803	1.55713	0.678067	-1.19939	0.21905	0.99965	Down
XLOC_010124	RP11-677I18.3	11	106051097	106101975	1.99243	0.991561	-1.00676	0.65015	0.99965	Down
XLOC_010221	LINC00900	11	115659167	115843146	0.53713	0.139086	-1.94929	0.21805	0.99965	Down
XLOC_010271	RP11-110I1.5	11	118998141	119030906	2.63592	1.20665	-1.1273	0.645	0.99965	Down
XLOC_010276	RP11-110I1.13	11	119067373	119081978	1.09533	0.402123	-1.44566	0.6283	0.99965	Down
XLOC_010621	RP11-434C1.4	12	11351822	11501041	0.487861	0.185092	-1.39823	0.3813	0.99965	Down
XLOC_010817	ALG10	12	34022280	34056740	1.09625	0.483719	-1.18034	0.0331	0.99965	Down
XLOC_010891	RP5-1057I20.2	12	47706084	47837898	0.492616	0.181991	-1.4366	0.4127	0.99965	Down
XLOC_010930	DNAJC22	12	49346916	49357546	0.940258	0.4619	-1.02548	0.2298	0.99965	Down
XLOC_010983	NR4A1	12	52022831	52059507	10.5507	4.53079	-1.21951	0.01185	0.99965	Down
XLOC_011020	ESPL1	12	53268298	53293643	0.603139	0.263232	-1.19616	0.0559	0.99965	Down
XLOC_011301	RP1-34H18.1	12	77324640	77572275	0.423444	0.081623	-2.37513	0.1618	0.99965	Down
XLOC_011477	PARPBP	12	102120184	102480645	1.3404	0.521874	-1.36089	0.14615	0.99965	Down
XLOC_011535	RP11-423G4.8	12	108778143	108857590	4.29245	0.67826	-2.66189	0.45935	0.99965	Down
XLOC_011627	LINC00173	12	116533421	116536518	0.770773	0.094611	-3.02623	0.04555	0.99965	Down
XLOC_011711	LRRC43	12	122167737	122203471	0.530966	0.105	-2.33823	0.12465	0.99965	Down
XLOC_011778	RP11-575F12.3	12	127147148	127150081	0.520819	0.13503	-1.9475	0.0172	0.99965	Down
XLOC_011912	RP5-1180D12.1	12	3606632	3764819	1.25502	0.597208	-1.07141	0.21235	0.99965	Down
XLOC_012094	HIST4H4	12	14767998	14771131	0.570711	0.159869	-1.83587	0.1099	0.99965	Down
XLOC_012200	RP11-996F15.6	12	29149102	29381189	1.17041	0.412926	-1.50307	0.5611	0.99965	Down
XLOC_012271	CPNE8	12	38646821	38909592	1.3602	0.575312	-1.2414	0.0344	0.99965	Down
XLOC_012325	PLEKHA8P1	12	45173063	45440404	0.948536	0.223856	-2.08313	0.34995	0.99965	Down
XLOC_012433	RP11-454E5.4	12	51186935	51217693	0.715861	0.183696	-1.96236	0.3013	0.99965	Down
XLOC_012437	GALNT6	12	51351246	51515763	2.32671	0.901008	-1.36868	0.01365	0.99965	Down
XLOC_012443	RP11-1100L3.8	12	52022831	52059507	9.75628	3.3432	-1.5451	0.03995	0.99965	Down
XLOC_012452	KRT87P	12	52232519	52309163	0.67291	0.286645	-1.23115	0.71945	0.99965	Down
XLOC_012667	RP11-366L20.2	12	65758019	65966295	1.35395	0.622003	-1.12218	0.52345	0.99965	Down
XLOC_012673	RBMS1P1	12	66188878	66257434	0.485203	0.204482	-1.24662	0.21355	0.99965	Down
XLOC_012759	PHLDA1	12	76025446	76033932	46.5921	21.4193	-1.12117	5e-05	0.07393	Down
XLOC_012841	RP11-511B23.2	12	92999217	93215679	0.667454	0.128845	-2.37303	0.11255	0.99965	Down
XLOC_012848	SOCS2-AS1	12	93542462	93583487	0.415791	0.199757	-1.05761	0.51885	0.99965	Down
XLOC_012987	SELPLG	12	108622276	108641318	2.31288	1.12974	-1.0337	0.0216	0.99965	Down
XLOC_012995	USP30-AS1	12	109023088	109088026	0.623793	0.0681333	-3.19464	0.246	0.99965	Down
XLOC_013018	HVCN1	12	110614026	110704950	1.52591	0.661062	-1.20681	0.30535	0.99965	Down
XLOC_013177	RP11-380L11.4	12	123762187	124316024	1.62431	0.583554	-1.47688	0.64625	0.99965	Down
XLOC_013182	RP11-214K3.20	12	123762187	124316024	0.446692	0.0849424	-2.39472	0.4882	0.99965	Down
XLOC_013271	RP13-820C6.2	12	131949919	132081102	4.91042	2.10957	-1.2189	0.24585	0.99965	Down
XLOC_013274	RP13-977J11.5	12	132084282	132131639	1.88791	0.458577	-2.04155	0.42725	0.99965	Down
XLOC_013607	FAM124A	13	51222333	51284241	0.436268	0.124259	-1.81186	0.03575	0.99965	Down
XLOC_013878	RP11-153I24.4	13	108251239	108308484	0.525966	0.131428	-2.00069	0.4103	0.99965	Down
XLOC_013893	RP11-291I6.2	13	110148962	110513027	0.576331	0.210963	-1.4499	0.58785	0.99965	Down
XLOC_013934	RP11-230F18.6	13	113490994	113554590	0.866479	0.389956	-1.15186	0.67045	0.99965	Down
XLOC_013948	WI2-1528O10.1	13	114346166	114346637	0.572615	0.216194	-1.40524	0.36705	0.99965	Down
XLOC_014062	SHISA2	13	26044596	26051031	2.38288	0.504273	-2.24043	0.0001	0.113738	Down
XLOC_014144	CCDC169,CCDC169-SOHLH2,SOHLH2	13	36168207	36297842	1.63052	0.759129	-1.10292	0.0657	0.99965	Down
XLOC_014167	LINC00571	13	38050816	38143232	0.620672	0.182044	-1.76954	0.2785	0.99965	Down
XLOC_014238	KCTD4	13	45120514	45284909	3.75264	1.67538	-1.16342	0.2097	0.99965	Down
XLOC_014570	RP11-381O6.1	13	107163509	107866735	0.582212	0.254717	-1.19265	0.51735	0.99965	Down
XLOC_014718	AE000658.22	14	21521080	21537216	1.14149	0.538778	-1.08316	0.53845	0.99965	Down
XLOC_014854	RP11-298I3.1	14	22929608	22982642	0.522975	0.24176	-1.11317	0.61385	0.99965	Down
XLOC_015215	RP11-840I19.3	14	64914360	65102695	0.616706	0.184712	-1.7393	0.33505	0.99965	Down
XLOC_015228	PLEKHH1	14	67447083	67600287	0.533599	0.237099	-1.17027	0.28335	0.99965	Down
XLOC_015326	BATF	14	75522424	75547015	0.536488	0.0943888	-2.50686	0.1404	0.99965	Down
XLOC_015828	CTD-2555K7.2	14	22702142	22773041	0.407909	0.134664	-1.59888	0.4082	0.99965	Down
XLOC_016042	RN7SL2	14	49862546	49862849	232.81	106.946	-1.12228	0.00025	0.184825	Down
XLOC_016051	RP11-247L20.4	14	50237562	50416461	1.0915	0.469619	-1.21675	0.49975	0.99965	Down
XLOC_016108	TBPL2	14	55413540	55456726	0.444419	0.169033	-1.39462	0.29355	0.99965	Down
XLOC_016110	LINC00520	14	55781134	55796688	0.407083	0.177121	-1.20059	0.40995	0.99965	Down
XLOC_016254	RP1-292L20.3	14	70906656	70907111	0.906454	0.34162	-1.40784	0.28215	0.99965	Down
XLOC_016329	RP11-488C13.6	14	76762188	76826246	0.519749	0.0574552	-3.17731	0.46695	0.99965	Down
XLOC_016410	RP11-944C7.1	14	89124870	89954777	0.523915	0.261913	-1.00025	0.667	0.99965	Down
XLOC_016415	RP11-471B22.2	14	90396501	90408261	0.647595	0.235563	-1.45898	0.58185	0.99965	Down
XLOC_016536	RP11-45P15.4	14	103331673	103332367	1.07511	0.443271	-1.27822	0.1624	0.99965	Down
XLOC_016814	PWAR5,RP11-701H24.5	15	24823646	25439056	0.925078	0.372016	-1.31421	0.64665	0.99965	Down
XLOC_016961	RP11-540B6.3	15	30899479	30900327	1.06238	0.195327	-2.44334	0.10685	0.99965	Down
XLOC_016991	RP11-1084A12.2	15	34224998	34338060	0.395109	0.147351	-1.423	0.58865	0.99965	Down
XLOC_017021	RP11-128A17.1	15	36889203	37101299	2.05121	0.663304	-1.62873	0.48795	0.99965	Down
XLOC_017044	SRP14-AS1	15	40039310	40067290	0.824194	0.194916	-2.08013	0.0452	0.99965	Down
XLOC_017184	RP11-295H24.4	15	49106067	49620931	0.544707	0.138835	-1.97211	0.5371	0.99965	Down
XLOC_017200	RP11-507J18.2	15	50702265	50765808	0.943958	0.229319	-2.04136	0.52785	0.99965	Down
XLOC_017367	IQCH	15	67201032	67530143	0.781645	0.253942	-1.62201	0.15895	0.99965	Down
XLOC_017595	RN7SL417P	15	84389728	84395903	1.29691	0.309209	-2.06842	0.3151	0.99965	Down
XLOC_017602	LINC00933	15	84507884	84580175	0.772623	0.167123	-2.20885	0.25505	0.99965	Down
XLOC_017664	RP11-697E2.11	15	90249529	90314499	0.706959	0.264898	-1.41619	0.6171	0.99965	Down
XLOC_017974	RP11-1000B6.8	15	32519847	32639949	0.488717	0.122468	-1.9966	0.5376	0.99965	Down
XLOC_017978	RP11-758N13.3	15	32765544	33194733	0.489835	0.180912	-1.43701	0.5716	0.99965	Down
XLOC_018052	RP11-64K12.8	15	40439720	40468242	0.853232	0.297296	-1.52104	0.51015	0.99965	Down
XLOC_018105	RP11-473C18.3	15	43106224	43221283	0.715799	0.271746	-1.39729	0.6441	0.99965	Down
XLOC_018117	AC011330.13	15	43628502	43684339	1.21034	0.497826	-1.2817	0.25375	0.99965	Down
XLOC_018191	ATP8B4	15	49858237	50236395	0.420951	0.169145	-1.31539	0.0813	0.99965	Down
XLOC_018206	CYP19A1	15	51037487	51338610	0.480042	0.0546967	-3.13364	0.0186	0.99965	Down
XLOC_018270	ALDH1A2	15	57953423	58569843	0.525703	0.188627	-1.47871	0.0747	0.99965	Down
XLOC_018422	THAP10	15	70829129	71053657	2.19813	0.882473	-1.31665	0.4784	0.99965	Down
XLOC_018532	RP11-762H8.4	15	78250501	78299924	2.14935	0.479246	-2.16506	0.37805	0.99965	Down
XLOC_018556	BCL2A1	15	79960888	79971446	0.474231	0.233158	-1.02428	0.2737	0.99965	Down
XLOC_018652	RP11-343B18.2	15	88797412	88798734	0.431253	0.0820749	-2.39352	0.1069	0.99965	Down
XLOC_018660	RP11-326A19.5	15	89087077	89202360	29.9349	14.9455	-1.00212	0.2604	0.99965	Down
XLOC_018699	RP11-24J19.1	15	91853694	92331037	0.585306	0.266775	-1.13357	0.476	0.99965	Down
XLOC_018703	FAM174B	15	92602909	92809884	0.875209	0.414357	-1.07875	0.3036	0.99965	Down
XLOC_018912	RP11-20I23.2	16	2475117	2531422	1.15113	0.517271	-1.15406	0.6458	0.99965	Down
XLOC_019055	RP11-65J21.3	16	14302287	14326353	2.52065	0.661188	-1.93066	0.0411	0.99965	Down
XLOC_019148	CTB-31N19.3	16	21597217	21657473	0.461735	0.101479	-2.18588	0.53955	0.99965	Down
XLOC_019182	PLK1	16	23677655	23713500	0.815412	0.394767	-1.04653	0.1181	0.99965	Down
XLOC_019218	KIAA0556	16	27550132	27780369	5.74947	2.5768	-1.15785	0.05215	0.99965	Down
XLOC_019522	HNRNPA1P48	16	51645755	51647132	0.865441	0.251224	-1.78446	0.0399	0.99965	Down
XLOC_019583	MT1X	16	56638665	56850286	21.2036	8.45393	-1.32662	0.08155	0.99965	Down
XLOC_019606	ADGRG1	16	57610651	57665580	1.79293	0.878923	-1.02851	0.0043	0.974532	Down
XLOC_019759	RP11-432I5.6	16	71623707	71724701	0.727546	0.2723	-1.41784	0.56165	0.99965	Down
XLOC_019795	AC009120.5	16	74296774	74369826	0.629166	0.0954059	-2.72129	0.51325	0.99965	Down
XLOC_019942	RP4-536B24.2	16	87830022	87869488	0.613252	0.093051	-2.72039	0.47945	0.99965	Down
XLOC_019983	CDK10	16	89680736	89701705	90.0225	37.3124	-1.27063	0.18495	0.99965	Down
XLOC_020013	LA16c-349E10.1	16	636816	768865	1.11704	0.486537	-1.19906	0.69185	0.99965	Down
XLOC_020096	RP11-20I23.6	16	2537963	2603188	1.93725	0.898979	-1.10765	0.63195	0.99965	Down
XLOC_020145	RP11-462G12.2	16	3931216	3946305	0.50274	0.110265	-2.18884	0.18555	0.99965	Down
XLOC_020296	MYH11	16	15643266	15857033	0.507653	0.190748	-1.41217	0.26215	0.99965	Down
XLOC_020463	RP11-264B17.2	16	28950806	28967097	2.23621	0.910695	-1.29601	0.37435	0.99965	Down
XLOC_020465	RP11-264B17.5	16	28973961	28990783	0.606431	0.228542	-1.40788	0.6159	0.99965	Down
XLOC_020501	RP11-347C12.3	16	30204315	30209071	0.505191	0.0221753	-4.50981	0.0913	0.99965	Down
XLOC_020751	CES1	16	55802850	55833337	0.784949	0.284482	-1.46426	0.02645	0.99965	Down
XLOC_020759	RP11-413H22.3	16	56429132	56520283	0.984019	0.186616	-2.39861	0.50995	0.99965	Down
XLOC_020788	PRSS54	16	58231156	58295047	0.517391	0.239425	-1.11168	0.26375	0.99965	Down
XLOC_020905	RP11-521L9.1	16	68843603	69085180	0.907466	0.3236	-1.48763	0.50295	0.99965	Down
XLOC_020913	NQO1	16	69706995	69726951	229.559	112.438	-1.02974	0.00015	0.130465	Down
XLOC_021031	RP11-525K10.3	16	80065835	80563135	0.401859	0.15563	-1.36857	0.15235	0.99965	Down
XLOC_021060	RP11-483P21.2	16	82626802	83807834	2.07091	0.193587	-3.41921	0.2917	0.99965	Down
XLOC_021254	RN7SL784P	17	4833387	4903074	1.48605	0.54845	-1.43805	0.64375	0.99965	Down
XLOC_021313	WRAP53	17	7661778	7703502	2.66881	1.3064	-1.0306	0.29575	0.99965	Down
XLOC_021609	CTD-2350C19.2	17	28357580	28407197	0.534135	0.101137	-2.4009	0.5222	0.99965	Down
XLOC_021697	CTC-542B22.2	17	31860898	31901765	0.677991	0.307707	-1.13971	0.61925	0.99965	Down
XLOC_021853	CDC6	17	40287632	40304657	1.29426	0.310529	-2.05933	0.0084	0.99965	Down
XLOC_021912	RAMP2	17	42753913	42763041	0.497823	0.173329	-1.52212	0.23845	0.99965	Down
XLOC_021940	FAM215A	17	43914432	43927388	0.444819	0.11376	-1.96722	0.21305	0.99965	Down
XLOC_021965	CCDC103,FAM187A	17	44846352	44916937	0.640675	0.225757	-1.50482	0.359	0.99965	Down
XLOC_022165	GDPD1	17	59220466	59275967	0.680529	0.316499	-1.10445	0.09405	0.99965	Down
XLOC_022251	RP11-583F2.1	17	64927633	64934203	1.23264	0.545285	-1.17667	0.36505	0.99965	Down
XLOC_022294	LINC00674	17	68101907	68115518	9.89099	4.01514	-1.30067	0.2581	0.99965	Down
XLOC_022447	RP11-353N14.7	17	79932342	80035848	1.32798	0.195354	-2.76507	0.5116	0.99965	Down
XLOC_022491	RP11-498C9.16	17	81878424	81881106	0.567099	0.272142	-1.05924	0.35685	0.99965	Down
XLOC_022503	RP11-1376P16.2	17	82101459	82212830	0.561237	0.256088	-1.13197	0.56675	0.99965	Down
XLOC_022527	AC144831.3	17	83098376	83098987	2.84558	1.12299	-1.34138	0.05425	0.99965	Down
XLOC_022674	RP11-589P10.5	17	6853860	7019659	1.72402	0.363663	-2.24511	0.52915	0.99965	Down
XLOC_022739	GAS7	17	9910608	10198551	0.454988	0.176774	-1.36393	0.1117	0.99965	Down
XLOC_022750	CTC-297N7.9	17	10672473	10815164	0.450113	0.133336	-1.75523	0.54485	0.99965	Down
XLOC_022831	RASD1	17	17494436	17496395	6.1358	1.65067	-1.8942	0.0002	0.164289	Down
XLOC_022885	RP11-78O7.2	17	19896589	19897287	0.689341	0.259574	-1.40907	0.1937	0.99965	Down
XLOC_023053	CTD-2370N5.3,EVI2A,EVI2B	17	31008496	31382116	3.07983	1.4517	-1.0851	0.41	0.99965	Down
XLOC_023727	SLC16A6	17	68259181	68763882	5.26385	1.40198	-1.90865	0.4578	0.99965	Down
XLOC_023730	FAM20A	17	68259181	68763882	2.79517	1.10178	-1.3431	0.32345	0.99965	Down
XLOC_024132	ANKRD20A5P	18	14179096	14234797	1.68465	0.729153	-1.20815	0.1204	0.99965	Down
XLOC_024253	DTNA	18	34493289	34891844	0.948272	0.235569	-2.00915	0.001	0.448061	Down
XLOC_024264	RP11-873E20.1	18	35716369	35717978	1.87629	0.914864	-1.03625	0.04395	0.99965	Down
XLOC_024407	PMAIP1	18	59899947	59904306	5.27924	2.22848	-1.24427	0.0011	0.472331	Down
XLOC_024428	TNFRSF11A	18	62325286	62391292	0.952955	0.446224	-1.09464	0.03565	0.99965	Down
XLOC_024444	SERPINB10,SERPINB2	18	63871691	63936111	19.5054	4.61046	-2.08089	5e-05	0.07393	Down
XLOC_024511	RP11-17M16.2	18	76358189	76495190	0.525541	0.228525	-1.20145	0.6457	0.99965	Down
XLOC_024562	TYMSOS	18	596987	712676	0.45084	0.198105	-1.18635	0.57515	0.99965	Down
XLOC_024625	RP11-789C17.5	18	7566781	8406953	4.62049	0.782686	-2.56154	0.48435	0.99965	Down
XLOC_024665	RP11-703I16.1	18	12031177	12032181	0.483807	0.183597	-1.39789	0.36705	0.99965	Down
XLOC_024763	RP11-17J14.2	18	23134563	23437961	4.11021	1.60666	-1.35515	0.35355	0.99965	Down
XLOC_024766	ANKRD29	18	23598925	23662885	5.30119	2.2321	-1.24791	0.00665	0.99965	Down
XLOC_024960	CCDC68	18	54901508	54959508	1.35076	0.377363	-1.83975	0.00085	0.418937	Down
XLOC_024979	RP11-706P11.2	18	57588610	57589091	0.554443	0.209551	-1.40374	0.36705	0.99965	Down
XLOC_024986	RP11-845C23.3	18	58044366	58401540	0.725358	0.278366	-1.38171	0.50365	0.99965	Down
XLOC_025044	RP11-421N8.1	18	68277801	68278243	1.58187	0.476166	-1.7321	0.13575	0.99965	Down
XLOC_025096	RP11-162A12.4	18	76794731	76822295	0.935671	0.158429	-2.56217	0.2175	0.99965	Down
XLOC_025182	AC005943.6	19	1573595	1605490	26.1055	5.63414	-2.21209	0.5277	0.99965	Down
XLOC_025210	TLE6	19	2977445	2995184	0.403774	0.0642947	-2.65078	0.03395	0.99965	Down
XLOC_025229	AC005954.4	19	3750818	3761699	0.447838	0.170299	-1.3949	0.5052	0.99965	Down
XLOC_025287	TNFSF9	19	6530998	6535928	1.39834	0.542106	-1.36707	0.0242	0.99965	Down
XLOC_025392	CTC-510F12.3	19	11199294	11262481	0.383011	0.0967477	-1.98509	0.54995	0.99965	Down
XLOC_025442	Metazoa_SRP	19	12763002	12874951	0.709159	0.256633	-1.4664	0.58825	0.99965	Down
XLOC_025541	CTC-429P9.2	19	16479056	16660442	0.831371	0.309477	-1.42566	0.60705	0.99965	Down
XLOC_025555	OCEL1	19	17226203	17229219	4.17498	2.01462	-1.05126	0.0756	0.99965	Down
XLOC_025713	CTB-92J24.2	19	23914875	23957930	0.458294	0.22824	-1.00572	0.263	0.99965	Down
XLOC_025718	CTC-459F4.9	19	27684579	27984984	0.93103	0.426718	-1.12554	0.2678	0.99965	Down
XLOC_025859	ZNF345	19	36797517	36916291	1.75302	0.655163	-1.41992	0.18985	0.99965	Down
XLOC_025872	CTD-2554C21.1	19	37735832	37817300	0.8267	0.072664	-3.50805	0.1785	0.99965	Down
XLOC_025883	CATSPERG	19	38335774	38370943	0.618854	0.293063	-1.07839	0.1814	0.99965	Down
XLOC_025979	CTC-378H22.2	19	42086109	42196585	0.439384	0.208425	-1.07596	0.43035	0.99965	Down
XLOC_026086	NAPA-AS1	19	47484281	47515240	0.555725	0.170747	-1.70251	0.56435	0.99965	Down
XLOC_026089	GLTSCR1	19	47607523	47743134	4.4544	1.80362	-1.30433	0.38565	0.99965	Down
XLOC_026091	GLTSCR2	19	47745521	47768840	173.561	76.1476	-1.18857	0.1832	0.99965	Down
XLOC_026093	CTD-2571L23.9	19	47794466	47794920	3.27281	0.293579	-3.47871	0.25155	0.99965	Down
XLOC_026361	NLRP2	19	54923508	55001142	0.425686	0.0903613	-2.23601	0.02785	0.99965	Down
XLOC_026362	CTC-550B14.7	19	55006192	55071291	1.0817	0.0857942	-3.65628	0.2656	0.99965	Down
XLOC_026543	RN7SL121P	19	2511218	2702709	0.803799	0.288726	-1.47713	0.466	0.99965	Down
XLOC_026550	AC006130.3	19	2841434	2860484	0.673483	0.170726	-1.97996	0.4642	0.99965	Down
XLOC_026559	AC005262.2	19	3094409	3124004	6.2782	3.12491	-1.00654	0.5877	0.99965	Down
XLOC_026586	STAP2	19	4324042	4360086	0.959519	0.422036	-1.18494	0.18105	0.99965	Down
XLOC_026596	SEMA6B	19	4542592	4559808	0.460746	0.0730754	-2.65651	0.0435	0.99965	Down
XLOC_026599	AC005339.2	19	4639517	4670370	1.35199	0.288414	-2.22887	0.51585	0.99965	Down
XLOC_026667	CTD-3193O13.1	19	7916144	7919157	0.385264	0.0973025	-1.9853	0.2005	0.99965	Down
XLOC_026889	CTD-2278I10.4	19	17292130	17334829	0.915239	0.0990376	-3.2081	0.51425	0.99965	Down
XLOC_027121	CTD-2527I21.14	19	34994783	35026471	0.727727	0.276146	-1.39796	0.6465	0.99965	Down
XLOC_027140	AC002398.11	19	35718018	35758079	0.416913	0.158807	-1.39247	0.63735	0.99965	Down
XLOC_027142	AC002398.13	19	35758142	35771028	0.836354	0.12563	-2.73493	0.297	0.99965	Down
XLOC_027206	LGALS4	19	38801670	38813364	0.493829	0.0861527	-2.51904	0.02335	0.99965	Down
XLOC_027350	CTB-171A8.1	19	44537057	44718759	0.447509	0.171499	-1.38372	0.53595	0.99965	Down
XLOC_027391	AC007193.9	19	46346993	46392981	0.464479	0.1166	-1.99405	0.5559	0.99965	Down
XLOC_027457	AC026803.1	19	48965300	48966878	22891.1	10411.5	-1.1366	0.64435	0.99965	Down
XLOC_027597	CTD-2224J9.7	19	53330674	53430413	0.693065	0.209551	-1.72569	0.4502	0.99965	Down
XLOC_027715	CTC-444N24.6	19	57267219	57294469	0.488194	0.189727	-1.36353	0.4821	0.99965	Down
XLOC_027774	AC142528.1	2	3496955	3523197	1.08089	0.374937	-1.5275	0.31945	0.99965	Down
XLOC_027787	RNF144A	2	6912276	7077880	1.17148	0.317816	-1.88207	0.0103	0.99965	Down
XLOC_027794	ID2	2	8666635	8684453	28.4404	13.291	-1.09749	0.00055	0.301196	Down
XLOC_027803	RP11-214N9.1	2	9555898	9556775	0.429916	0.189043	-1.18534	0.29495	0.99965	Down
XLOC_027815	RRM2	2	10122327	10131419	1.08076	0.418336	-1.36932	0.0773	0.99965	Down
XLOC_027886	AC079145.4	2	19990216	20012694	0.698622	0.265392	-1.39639	0.4712	0.99965	Down
XLOC_027939	KCNK3	2	26692689	26733420	1.0246	0.418352	-1.29227	0.0213	0.99965	Down
XLOC_027960	GCKR	2	27496841	27523684	1.47176	0.369354	-1.99446	0.00545	0.99965	Down
XLOC_027999	CTC-336P14.1	2	31865059	32039812	1.224	0.223352	-2.45421	0.5173	0.99965	Down
XLOC_028034	AC007899.3	2	37084450	37157065	0.430217	0.16513	-1.38146	0.641	0.99965	Down
XLOC_028124	AC079807.2	2	47695529	47907810	0.656249	0.188109	-1.80267	0.4365	0.99965	Down
XLOC_028147	CHAC2	2	53532671	53860160	0.79398	0.321814	-1.30288	0.6624	0.99965	Down
XLOC_028288	ANKRD53	2	70935881	71079805	0.473992	0.207696	-1.19039	0.3862	0.99965	Down
XLOC_028307	RP11-44N22.3	2	72942035	73156721	0.674596	0.155288	-2.11908	0.4776	0.99965	Down
XLOC_028416	SNORD94	2	86106181	86142157	14.9047	4.76724	-1.64454	0.54405	0.99965	Down
XLOC_028514	PROM2	2	95274452	95291308	0.639206	0.182953	-1.80481	0.08945	0.99965	Down
XLOC_028515	KCNIP3	2	95297303	95386083	0.414798	0.173595	-1.25669	0.16065	0.99965	Down
XLOC_028776	PTPN4	2	119759630	119983818	6.46564	3.17023	-1.0282	0.1431	0.99965	Down
XLOC_028887	GPR39	2	132416573	132671579	0.601445	0.298341	-1.01147	0.69955	0.99965	Down
XLOC_028939	KYNU	2	142877497	143055832	0.63741	0.135333	-2.23571	0.026	0.99965	Down
XLOC_028978	TNFAIP6	2	151357591	151380048	3.81842	1.29021	-1.56536	0.0018	0.59144	Down
XLOC_029088	DAP3P2	2	171491421	171491931	0.634641	0.0962018	-2.7218	0.0869	0.99965	Down
XLOC_029115	AC010894.3	2	174487388	174488386	0.576844	0.0840994	-2.77801	0.28125	0.99965	Down
XLOC_029222	C2orf88	2	189879608	190371665	0.93682	0.368465	-1.34624	0.21835	0.99965	Down
XLOC_029223	HNRNPCP2	2	189879608	190371665	0.671805	0.0470002	-3.8373	0.2843	0.99965	Down
XLOC_029324	RP11-686O6.1	2	202336738	202337200	0.590018	0.222544	-1.40667	0.36705	0.99965	Down
XLOC_029341	RN7SL670P	2	203238448	203305840	1.01566	0.245646	-2.04777	0.5267	0.99965	Down
XLOC_029366	AC017081.1	2	206355738	206356119	2.43579	0.907424	-1.42454	0.1426	0.99965	Down
XLOC_029547	CCL20	2	227813841	227817564	2.73339	0.648603	-2.07529	0.00565	0.99965	Down
XLOC_029780	ID2-AS1	2	8666635	8684453	0.670894	0.182543	-1.87785	0.20975	0.99965	Down
XLOC_029794	RP11-254F7.3	2	10042848	10054866	8.26449	3.05245	-1.43696	0.19455	0.99965	Down
XLOC_030348	C2orf81	2	74414175	74421591	0.984191	0.363484	-1.43705	0.0327	0.99965	Down
XLOC_030677	MALL	2	110083869	110116566	10.1068	4.85267	-1.05847	0.00015	0.130465	Down
XLOC_030709	IL1B	2	112829750	112836903	16.4133	7.24753	-1.1793	0.0005	0.29572	Down
XLOC_030776	YWHAZP2	2	126557434	126558162	0.854677	0.238252	-1.84289	0.1183	0.99965	Down
XLOC_030995	NR4A2	2	156324431	156342348	3.84979	0.876821	-2.13442	5e-05	0.07393	Down
XLOC_031003	CYTIP	2	157414618	157488961	0.400794	0.180247	-1.15289	0.2332	0.99965	Down
XLOC_031098	AC078883.3	2	172427353	172608669	1.40738	0.62985	-1.15993	0.67725	0.99965	Down
XLOC_031237	RP11-647K16.1	2	190408354	190534722	0.66149	0.124256	-2.41241	0.3853	0.99965	Down
XLOC_031282	RFTN2	2	197568223	197676045	1.85238	0.789571	-1.23024	0.0606	0.99965	Down
XLOC_031322	AC079354.5	2	202073254	202197862	0.899387	0.43809	-1.03772	0.4924	0.99965	Down
XLOC_031325	AC064836.3	2	202336023	202336727	0.405818	0.12434	-1.70655	0.26045	0.99965	Down
XLOC_031478	RP11-316O14.1	2	219434845	219538772	1.20776	0.49679	-1.28163	0.6864	0.99965	Down
XLOC_031480	RP11-256I23.1	2	219538946	219550595	0.774118	0.116677	-2.73003	0.45775	0.99965	Down
XLOC_031510	AP1S3	2	223751685	223838027	1.97195	0.913825	-1.10963	0.0783	0.99965	Down
XLOC_031616	AC112721.2	2	237428919	237434822	1.16437	0.353855	-1.71832	0.13575	0.99965	Down
XLOC_031666	PASK	2	241106098	241183652	0.98818	0.306949	-1.68678	0.19625	0.99965	Down
XLOC_031785	SNAP25	20	9986087	10368776	0.484055	0.125588	-1.94647	0.1998	0.99965	Down
XLOC_031922	HM13-IT1	20	31514427	31577923	0.459342	0.170069	-1.43345	0.58865	0.99965	Down
XLOC_032117	UBE2C	20	45812575	45816957	0.912133	0.278525	-1.71144	0.05285	0.99965	Down
XLOC_032434	FERMT1	20	6074844	6123544	0.401886	0.199705	-1.00891	0.18065	0.99965	Down
XLOC_032520	DZANK1	20	18383366	18484643	1.34994	0.588679	-1.19734	0.2682	0.99965	Down
XLOC_032549	RPS15AP1	20	21125982	21246622	1.16392	0.289638	-2.00667	0.4217	0.99965	Down
XLOC_032679	RALY-AS1	20	33983051	34112332	0.645621	0.270765	-1.25365	0.5577	0.99965	Down
XLOC_032835	WFDC3	20	45747943	45791932	0.579755	0.218642	-1.40687	0.09335	0.99965	Down
XLOC_033004	RP4-563E14.1	20	62877737	62937952	0.769064	0.261557	-1.55598	0.5627	0.99965	Down
XLOC_033021	RP4-583P15.16	20	63657809	63743505	0.620527	0.226293	-1.4553	0.5843	0.99965	Down
XLOC_033163	MIR99AHG	21	16070521	16627397	4.592	1.8532	-1.3091	0.04985	0.99965	Down
XLOC_033177	AP000432.1	21	17593652	17633199	0.98642	0.436824	-1.17515	0.28795	0.99965	Down
XLOC_033365	MX2	21	41361942	41409390	0.389995	0.141742	-1.46018	0.08335	0.99965	Down
XLOC_033744	AP001434.2	21	38121450	38307357	0.714801	0.258549	-1.4671	0.4479	0.99965	Down
XLOC_033865	Metazoa_SRP	21	46324121	46445769	0.930952	0.452541	-1.04066	0.62535	0.99965	Down
XLOC_033867	S100B	21	46598961	46605208	0.429916	0.141782	-1.60038	0.1506	0.99965	Down
XLOC_033938	AC007326.1	22	18945122	18946971	1.30634	0.45592	-1.51867	0.276	0.99965	Down
XLOC_033955	CDC45	22	19479458	19520612	0.532967	0.0531708	-3.32534	0.00325	0.814483	Down
XLOC_033962	TANGO2	22	20017013	20070569	27.2381	11.1124	-1.29345	0.19225	0.99965	Down
XLOC_034141	MMP11	22	23763020	23784316	1.1134	0.452213	-1.2999	0.15135	0.99965	Down
XLOC_034218	CTA-984G1.5	22	29259851	29300525	0.398573	0.148727	-1.42218	0.5792	0.99965	Down
XLOC_034361	CTA-228A9.3	22	38084888	38110670	0.620394	0.213521	-1.53881	0.11165	0.99965	Down
XLOC_034363	MAFF	22	38111494	38216511	25.2184	12.4206	-1.02174	0.0005	0.29572	Down
XLOC_034567	AP000525.10	22	15784958	15829984	0.658977	0.237619	-1.47158	0.48725	0.99965	Down
XLOC_034665	AC007308.7	22	20707690	20891218	1.89719	0.470411	-2.01187	0.577	0.99965	Down
XLOC_034829	DUSP18	22	30635651	30669016	3.43207	1.57534	-1.12342	0.09535	0.99965	Down
XLOC_034941	RP3-508I15.10	22	38656635	38681820	0.536728	0.13401	-2.00185	0.3807	0.99965	Down
XLOC_034976	RP4-756G23.5	22	41205204	41240934	1.69261	0.818064	-1.04896	0.35665	0.99965	Down
XLOC_035017	RPL5P34	22	42776405	42777296	1.14438	0.556333	-1.04055	0.1594	0.99965	Down
XLOC_035052	WNT7B	22	45920361	45977129	1.04336	0.421955	-1.30608	0.1381	0.99965	Down
XLOC_035089	RP3-402G11.27	22	50200978	50217616	1.11954	0.528811	-1.08209	0.4615	0.99965	Down
XLOC_035169	FANCD2	3	10026413	10108231	1.01227	0.280639	-1.85081	0.05605	0.99965	Down
XLOC_035219	RN7SL4P	3	15667235	15859771	0.671949	0.243921	-1.46194	0.5874	0.99965	Down
XLOC_035447	RTP3	3	46497490	46500949	0.491508	0.234041	-1.07045	0.212	0.99965	Down
XLOC_035487	RP13-131K19.6	3	49024324	49029706	0.582287	0.289638	-1.00748	0.6415	0.99965	Down
XLOC_035543	PHF7	3	52410560	52423641	2.00248	0.965384	-1.05261	0.08285	0.99965	Down
XLOC_035619	RP11-245J9.6	3	64004021	64024010	0.519909	0.259919	-1.00019	0.6465	0.99965	Down
XLOC_035651	MITF	3	69739434	69968337	1.03804	0.3912	-1.40788	0.0289	0.99965	Down
XLOC_035838	RP11-446H18.6	3	107240691	107421304	0.594874	0.271017	-1.1342	0.46825	0.99965	Down
XLOC_035878	RP11-572M11.4	3	112990446	113183301	0.510354	0.163372	-1.64334	0.3457	0.99965	Down
XLOC_035947	EAF2	3	121835182	121886526	0.461038	0.151886	-1.6019	0.11865	0.99965	Down
XLOC_036068	ACKR4	3	132558137	132874223	1.04927	0.193892	-2.43606	0.3276	0.99965	Down
XLOC_036199	ERICH6-AS1	3	150659884	150720836	1.07723	0.293029	-1.87821	0.13385	0.99965	Down
XLOC_036728	ZNF385D	3	21415070	22373321	3.46648	1.06114	-1.70785	0.01405	0.99965	Down
XLOC_036769	RBMS3-AS3	3	29264193	30010391	0.976846	0.447231	-1.12711	0.60495	0.99965	Down
XLOC_036835	RPL18AP7	3	38496126	38542161	0.73182	0.277695	-1.39799	0.5016	0.99965	Down
XLOC_036878	SNRK-AS1	3	43286511	43734371	1.86928	0.74571	-1.3258	0.5554	0.99965	Down
XLOC_036898	CDCP1	3	45082277	45146422	49.1268	23.2544	-1.07901	0.00015	0.130465	Down
XLOC_036914	LRRC2	3	46515422	46626543	5.38063	2.66473	-1.01379	0.00415	0.95878	Down
XLOC_037003	ZMYND10	3	50341105	50346852	0.427448	0.190116	-1.16887	0.23455	0.99965	Down
XLOC_037092	FHIT	3	59749309	61251459	1.6312	0.147011	-3.47194	0.0518	0.99965	Down
XLOC_037258	RNU6-26P	3	98714329	98901689	234.433	98.1927	-1.25549	0.6286	0.99965	Down
XLOC_037263	AC055723.1	3	99638474	99799226	4474.4	308.976	-3.85613	0.36475	0.99965	Down
XLOC_037280	RP11-49I4.3	3	101779201	101861022	3.14809	1.33399	-1.23873	0.62015	0.99965	Down
XLOC_037323	PVRL3-AS1	3	110893707	111275563	1.36823	0.16364	-3.06371	0.1702	0.99965	Down
XLOC_037754	RARRES1	3	158696891	158829719	2.79903	1.24582	-1.16783	0.5178	0.99965	Down
XLOC_037766	SCARNA7	3	160494994	160569248	1.59357	0.781353	-1.02822	0.6817	0.99965	Down
XLOC_037811	LRRC34	3	169793427	169812986	0.631182	0.135778	-2.21681	0.0141	0.99965	Down
XLOC_037880	KCNMB2-AS1	3	178202049	178860405	0.447622	0.143601	-1.64022	0.2818	0.99965	Down
XLOC_038141	FKSG51	4	3538043	3538418	1.04395	0.466103	-1.16333	0.36795	0.99965	Down
XLOC_038562	RP11-807H7.2	4	65702201	65705553	2.39144	0.594413	-2.00834	0.0847	0.99965	Down
XLOC_038641	CXCL8	4	73740505	73743716	45.0341	5.81458	-2.95327	5e-05	0.07393	Down
XLOC_038642	CXCL6	4	73836496	73849064	2.53236	0.420799	-2.58928	0.001	0.448061	Down
XLOC_038644	CXCL1	4	73869392	73871242	4.47843	1.01405	-2.14286	0.00045	0.289291	Down
XLOC_038647	EPGN	4	74308472	74315307	14.3832	5.33903	-1.42973	0.0009	0.429271	Down
XLOC_038649	EREG	4	74365142	74388751	0.490385	0.0993064	-2.30396	0.01255	0.99965	Down
XLOC_038686	ANXA3	4	78551518	78610451	1.44425	0.611907	-1.23894	0.0514	0.99965	Down
XLOC_038709	RP11-127B20.3	4	82352497	82384027	0.489559	0.224178	-1.12684	0.6698	0.99965	Down
XLOC_038722	AGPAT9	4	83535913	83605875	1.39213	0.534159	-1.38195	0.02055	0.99965	Down
XLOC_038748	SPP1	4	87975649	87983426	10.7688	4.86123	-1.14747	0.0025	0.724804	Down
XLOC_038978	PLK4	4	127880860	127899195	0.502884	0.165517	-1.60324	0.06905	0.99965	Down
XLOC_039139	MND1	4	153344648	153415118	0.66883	0.304352	-1.1359	0.21165	0.99965	Down
XLOC_039160	AC097467.2	4	155173715	155381694	0.417171	0.165344	-1.33517	0.02385	0.99965	Down
XLOC_039179	GRIA2	4	157204181	157366075	0.443894	0.0561309	-2.98335	0.02295	0.99965	Down
XLOC_039469	PPP2R2C	4	6320577	6563600	0.728669	0.108147	-2.75227	0.00965	0.99965	Down
XLOC_039493	SNRPCP16	4	9051841	9052051	1.70016	0.584819	-1.53961	0.276	0.99965	Down
XLOC_039547	RP11-115L11.1	4	15604538	15738313	1.22264	0.601245	-1.02397	0.71965	0.99965	Down
XLOC_039641	TMEM156	4	38966743	39032922	0.527344	0.200657	-1.39401	0.1547	0.99965	Down
XLOC_039663	RP11-227F19.5	4	41359606	41700044	0.649224	0.244238	-1.41043	0.61225	0.99965	Down
XLOC_039693	RAC1P2	4	46723829	46724408	3.70038	1.69101	-1.12979	0.0725	0.99965	Down
XLOC_039705	TEC	4	48135782	48269864	1.11257	0.456571	-1.28498	0.0657	0.99965	Down
XLOC_039771	RP11-738E22.3	4	56960926	56961373	0.466123	0.116999	-1.99421	0.1759	0.99965	Down
XLOC_039875	CXCL3	4	74036588	74038807	1.7965	0.402977	-2.15642	0.0064	0.99965	Down
XLOC_039878	CXCL2	4	74097034	74099293	0.871707	0.322237	-1.43572	0.07255	0.99965	Down
XLOC_040035	RP11-571L19.8	4	99067255	99068125	0.558245	0.238619	-1.22619	0.2326	0.99965	Down
XLOC_040272	SLC7A11	4	138027421	138242349	10.386	4.83219	-1.10388	5e-05	0.07393	Down
XLOC_040298	CLGN	4	140388454	140427968	1.74984	0.375827	-2.21909	0.00025	0.184825	Down
XLOC_040324	uc_338	4	144642921	144745271	3.07999	1.03031	-1.57985	0.58345	0.99965	Down
XLOC_040507	RP11-10K16.1	4	173131927	173329694	0.423628	0.056196	-2.91426	0.4242	0.99965	Down
XLOC_040648	CTD-2228K2.1	5	271620	438291	0.905684	0.406826	-1.1546	0.66535	0.99965	Down
XLOC_041086	CENPH	5	69189547	69210357	1.10761	0.552987	-1.00213	0.0964	0.99965	Down
XLOC_041200	RP11-168A11.4	5	79991310	80083654	0.595568	0.217656	-1.45221	0.4151	0.99965	Down
XLOC_041201	CTC-458I2.2	5	80111650	80256079	1.22764	0.536493	-1.19426	0.4278	0.99965	Down
XLOC_041297	CTD-2337A12.1	5	95885097	96808100	2.9385	0.429867	-2.77312	0.37545	0.99965	Down
XLOC_041542	CTB-113I20.2	5	134005146	134005562	0.698486	0.261848	-1.4155	0.3578	0.99965	Down
XLOC_042294	CTD-2203K17.1	5	33424024	33440619	0.470769	0.178783	-1.39681	0.36705	0.99965	Down
XLOC_042429	ESM1	5	54977863	55042844	53.9602	16.5486	-1.70519	5e-05	0.07393	Down
XLOC_042509	CENPK	5	65517765	65563171	1.05964	0.38132	-1.4745	0.06435	0.99965	Down
XLOC_042652	CTC-512J14.5	5	80351020	80351956	0.510399	0.0873755	-2.54633	0.16325	0.99965	Down
XLOC_042752	MCTP1	5	94152965	95284575	0.546119	0.199231	-1.45477	0.13945	0.99965	Down
XLOC_042788	RGMB-AS1	5	98768649	98798643	3.66342	1.55702	-1.23441	0.32375	0.99965	Down
XLOC_043072	LRRTM2	5	138610966	138935034	0.453255	0.199393	-1.18471	0.4825	0.99965	Down
XLOC_043176	GRPEL2-AS1	5	149345429	149357642	0.557248	0.277844	-1.00404	0.6006	0.99965	Down
XLOC_043405	PRR7-AS1	5	177402139	177456286	0.719496	0.317981	-1.17805	0.53085	0.99965	Down
XLOC_043463	CTC-205M6.5	5	180784781	180787869	0.732316	0.313919	-1.22208	0.0316	0.99965	Down
XLOC_043488	FOXQ1	6	1312472	1314187	1.26863	0.262362	-2.27365	0.00835	0.99965	Down
XLOC_043510	RP11-420L9.2	6	3754098	3754840	0.485099	0.121588	-1.99628	0.1759	0.99965	Down
XLOC_043717	HMGN4	6	26538404	26546254	78.4432	35.3564	-1.14968	0.192	0.99965	Down
XLOC_043939	B3GALT4	6	33277131	33299324	0.74968	0.327442	-1.19504	0.66325	0.99965	Down
XLOC_043942	KIFC1	6	33391535	33409924	0.406964	0.154935	-1.39323	0.139	0.99965	Down
XLOC_043979	RP3-340B19.2	6	35555872	35556264	0.96565	0.432621	-1.1584	0.36795	0.99965	Down
XLOC_044506	RFPL4B,RP11-506B6.7	6	112108759	112351296	0.648543	0.305087	-1.08798	0.42095	0.99965	Down
XLOC_044520	RP3-399L15.3	6	113933027	114471705	0.477043	0.0988447	-2.27088	0.01225	0.99965	Down
XLOC_044746	RP11-350J20.12	6	149724314	149923121	2.97785	1.30616	-1.18894	0.68855	0.99965	Down
XLOC_044773	CCDC170	6	151494029	151621193	0.529802	0.0597277	-3.14898	0.023	0.99965	Down
XLOC_044827	RP1-111C20.4	6	158972870	159065273	0.429138	0.126175	-1.76601	0.4053	0.99965	Down
XLOC_045008	RP11-421M1.8	6	10743323	10747663	0.510664	0.213402	-1.2588	0.36355	0.99965	Down
XLOC_045025	RP1-223E5.4	6	13574528	13615158	0.447113	0.19167	-1.22202	0.51235	0.99965	Down
XLOC_045187	ZNF311	6	28994784	29005316	0.409656	0.126974	-1.68988	0.0409	0.99965	Down
XLOC_045246	MDC1	6	30699806	30717889	10.9313	4.69159	-1.22032	0.11875	0.99965	Down
XLOC_045316	GPSM3,NOTCH4	6	32190765	32224067	2.67901	1.30129	-1.04176	0.02875	0.99965	Down
XLOC_045351	XXbac-BPG294E21.9	6	33420069	33457548	1.39956	0.400636	-1.80461	0.6061	0.99965	Down
XLOC_045364	RPL35P2	6	34246379	34426125	1.5503	0.657366	-1.23778	0.63575	0.99965	Down
XLOC_045735	RP11-30P6.6	6	85387218	85390186	0.427952	0.17355	-1.3021	0.0845	0.99965	Down
XLOC_045775	RRAGD	6	89364635	89412270	0.418078	0.18454	-1.17984	0.15445	0.99965	Down
XLOC_045781	BACH2	6	89926528	90296908	0.546739	0.264673	-1.04664	0.2569	0.99965	Down
XLOC_045854	RP1-111B22.3	6	108030248	108030718	0.430873	0.108441	-1.99035	0.1759	0.99965	Down
XLOC_046029	TARID	6	133240597	133895553	1.25008	0.195194	-2.67904	0.02595	0.99965	Down
XLOC_046073	RP11-356I2.4	6	137823672	137883312	0.62775	0.291577	-1.10631	0.45715	0.99965	Down
XLOC_046330	AC147651.4	7	549196	786475	0.927436	0.17776	-2.38332	0.415	0.99965	Down
XLOC_046343	PSMG3-AS1	7	1567329	1589626	0.939967	0.452534	-1.05459	0.2531	0.99965	Down
XLOC_046379	ZNF815P	7	5823159	5854435	0.462112	0.114036	-2.01875	0.05835	0.99965	Down
XLOC_046484	DNAH11	7	21543214	21946084	0.532653	0.121328	-2.13428	0.11665	0.99965	Down
XLOC_046537	HOXA11-AS,HOXA11-AS1_1,HOXA11-AS1_2,HOXA11-AS1_3,HOXA11-AS1_4,HOXA11-AS1_5,HOXA11-AS1_6	7	27181509	27193448	0.419787	0.193083	-1.12043	0.3219	0.99965	Down
XLOC_046693	IGFBP1	7	45888356	45893668	0.472156	0.140488	-1.74882	0.07505	0.99965	Down
XLOC_046844	TRIM60P18	7	64207089	64470653	0.725583	0.152114	-2.25398	0.32395	0.99965	Down
XLOC_047042	DBF4	7	87833567	87909541	2.71269	1.01606	-1.41674	0.0298	0.99965	Down
XLOC_047079	GNG11	7	93921698	93928610	11.2765	5.57375	-1.0166	0.00035	0.235232	Down
XLOC_047081	AC003092.1	7	94022832	94066661	2.20792	0.333701	-2.72606	0.0326	0.99965	Down
XLOC_047428	AKR1B15	7	134549135	134579875	0.677517	0.285802	-1.24524	0.0929	0.99965	Down
XLOC_047432	AGBL3	7	134986507	135170795	0.711821	0.32017	-1.15268	0.3593	0.99965	Down
XLOC_047504	TAS2R5	7	141790216	141791367	0.443332	0.205509	-1.10919	0.24685	0.99965	Down
XLOC_047854	RP5-1159O4.1,RP5-1159O4.2	7	7550103	7608929	0.540813	0.191754	-1.49587	0.5958	0.99965	Down
XLOC_047877	ETV1	7	13891227	13991425	9.03551	3.97709	-1.18389	0.0075	0.99965	Down
XLOC_047980	HOXA11	7	27181509	27193448	0.576055	0.275309	-1.06515	0.13225	0.99965	Down
XLOC_048425	AC004980.10	7	76650400	76650897	1.84677	0.699055	-1.40153	0.1258	0.99965	Down
XLOC_048435	FGL2	7	76978616	77416400	1.56765	0.382014	-2.0369	0.00705	0.99965	Down
XLOC_048477	AC005076.5	7	87151422	87220587	1.52034	0.34112	-2.15604	0.59935	0.99965	Down
XLOC_048522	TFPI2	7	93591572	93911265	63.4805	24.623	-1.36631	0.0001	0.113738	Down
XLOC_048534	PDK4	7	95583498	95596491	1.37029	0.660476	-1.05291	0.0446	0.99965	Down
XLOC_048600	TFR2	7	100620415	100642779	0.426188	0.211931	-1.0079	0.2275	0.99965	Down
XLOC_048676	CTA-363E19.2	7	107168960	107578464	0.833906	0.348846	-1.25729	0.67515	0.99965	Down
XLOC_048711	GPR85	7	113078330	113087778	1.62187	0.69685	-1.21874	0.0401	0.99965	Down
XLOC_048849	AC058791.1,MIR29A,MIR29B1	7	130853719	130928649	2.77071	1.15125	-1.26705	0.13105	0.99965	Down
XLOC_048879	SLC13A4	7	135662495	135748846	0.813784	0.38389	-1.08395	0.29215	0.99965	Down
XLOC_048880	FAM180A	7	135662495	135748846	25.142	11.6295	-1.11231	0.00115	0.472331	Down
XLOC_048968	ARHGEF35	7	144186082	144380632	0.636248	0.194788	-1.70768	0.1703	0.99965	Down
XLOC_048989	RNY1	7	148987135	148987248	172.583	81.3547	-1.08499	0.3932	0.99965	Down
XLOC_049738	CRISPLD1	8	74984514	75034558	0.98018	0.288519	-1.76438	0.0326	0.99965	Down
XLOC_049796	CA2	8	85327607	85481493	1.85984	0.414874	-2.16444	0.00185	0.594654	Down
XLOC_049938	AZIN1-AS1	8	102826356	102977876	1.82151	0.562938	-1.69409	0.0775	0.99965	Down
XLOC_050087	MIR1204,PVT1,PVT1_1,PVT1_3	8	127794532	128101253	224.349	59.2138	-1.92174	0.3347	0.99965	Down
XLOC_050525	PBK	8	27733310	27838095	0.454774	0.165414	-1.45907	0.3816	0.99965	Down
XLOC_050542	DUSP4	8	29333063	29350668	2.93318	1.28447	-1.19129	0.00055	0.301196	Down
XLOC_050572	RP11-722E23.2	8	33360838	33361415	0.743678	0.242719	-1.61539	0.1886	0.99965	Down
XLOC_050585	LSM12P1	8	35235456	35796550	0.413883	0.157696	-1.39208	0.35015	0.99965	Down
XLOC_050626	RP11-723D22.3	8	38728185	38853028	0.394976	0.147377	-1.42225	0.57885	0.99965	Down
XLOC_050756	RP11-446E9.1	8	56050037	56051207	0.478437	0.0672199	-2.83137	0.1563	0.99965	Down
XLOC_050850	LINC01592	8	68911802	69104190	0.58014	0.1388	-2.06339	0.0662	0.99965	Down
XLOC_051067	KB-1043D8.8	8	96140571	96140944	0.421597	0.156795	-1.42699	0.276	0.99965	Down
XLOC_051153	RP11-318M2.3	8	103121031	103332866	6.80623	2.95156	-1.20538	0.50425	0.99965	Down
XLOC_051154	RP11-1C8.6	8	103383077	103383854	0.643207	0.164599	-1.96633	0.1542	0.99965	Down
XLOC_051163	KB-1742H10.3	8	104478538	104480783	0.399097	0.179493	-1.15281	0.1253	0.99965	Down
XLOC_051355	TRAPPC9	8	139730342	140458579	8.29001	3.57457	-1.2136	0.0072	0.99965	Down
XLOC_051396	NAPRT	8	143573489	143603224	1.58256	0.754776	-1.06814	0.361	0.99965	Down
XLOC_051500	RP11-307L3.2	9	6278666	6279153	2.72041	0.823027	-1.72481	0.05685	0.99965	Down
XLOC_051834	RP11-262H14.4	9	62856998	62900104	1.8725	0.317052	-2.56218	0.1177	0.99965	Down
XLOC_052150	NR4A3	9	99821854	99866891	0.570189	0.103585	-2.46062	0.00235	0.709124	Down
XLOC_052241	C9orf43	9	113407234	113429684	0.464117	0.194054	-1.25803	0.67035	0.99965	Down
XLOC_052614	RP11-77E14.2	9	7786104	7786688	0.417843	0.0795843	-2.39241	0.1069	0.99965	Down
XLOC_052834	YBX1P10	9	35971343	35972318	1.51136	0.707343	-1.09537	0.10205	0.99965	Down
XLOC_053065	GNA14	9	77423078	77648307	0.419293	0.188958	-1.14989	0.18495	0.99965	Down
XLOC_053181	BARX1	9	93951621	93955372	2.72287	1.29529	-1.07186	0.02705	0.99965	Down
XLOC_058212	GK	X	30653358	30731456	2.22089	0.770608	-1.52707	0.01075	0.99965	Down
XLOC_058313	RGN	X	47078354	47093314	2.43227	0.665443	-1.86992	0.0014	0.52292	Down
XLOC_058370	MAGIX	X	49162563	49168483	0.58547	0.145709	-2.00651	0.02325	0.99965	Down
XLOC_058679	PABPC5	X	91414877	91438584	0.595204	0.28035	-1.08615	0.12235	0.99965	Down
XLOC_058764	RP13-349O20.2	X	103404776	103408299	0.590025	0.111272	-2.40668	0.28435	0.99965	Down
XLOC_058774	TMSB15B	X	103917410	103966712	0.612247	0.252055	-1.28037	0.1372	0.99965	Down
XLOC_059500	RP5-1158E12.3	X	45848073	45851490	0.835157	0.155368	-2.42636	0.10685	0.99965	Down
XLOC_059553	RP11-1148L6.9	X	48568013	48579066	0.684039	0.260044	-1.39532	0.63045	0.99965	Down
XLOC_059556	AF196970.3	X	48695553	48737163	0.690394	0.177249	-1.96164	0.19525	0.99965	Down
XLOC_059774	RP13-36G14.4	X	73944323	74293574	0.531809	0.227475	-1.2252	0.5445	0.99965	Down
XLOC_059941	BEX2	X	103309345	103311046	0.587188	0.266149	-1.14159	0.2553	0.99965	Down
XLOC_060096	RP1-315G1.3	X	123959232	124963817	0.544299	0.200026	-1.44422	0.5813	0.99965	Down
XLOC_060349	U52111.14	X	153724867	153785732	0.653906	0.0449551	-3.86253	0.4292	0.99965	Down

## Sheet: Neutrally_Regulated
Cuffmerge Gene ID	Gene Name	Chromosome	Gene Start (bp)	Gene End (bp)	FPKM 1	FPKM 3	log2(fold_change)	P_value	Q_value	Regulation
XLOC_000006	CICP27	1	89294	134836	0.766564	0.997717	0.380224	0.4147	0.99965	NEUTRAL
XLOC_000015	MTND2P28	1	601435	724903	32.0795	31.6225	-0.0207018	0.98405	0.99965	NEUTRAL
XLOC_000017	RP5-857K21.6	1	601435	724903	15.1906	16.7103	0.13756	0.8898	0.99965	NEUTRAL
XLOC_000018	RP5-857K21.7	1	601435	724903	0.592366	0.712449	0.266299	0.89435	0.99965	NEUTRAL
XLOC_000019	MTATP6P1,MTATP8P1,RP5-857K21.11	1	601435	724903	479.634	607.045	0.339869	0.2514	0.99965	NEUTRAL
XLOC_000023	RP11-206L10.9	1	778769	819837	1.31625	2.36324	0.844333	0.1929	0.99965	NEUTRAL
XLOC_000025	LINC01128	1	825137	859446	4.33487	3.90573	-0.150398	0.7655	0.99965	NEUTRAL
XLOC_000030	KLHL17	1	960586	965715	13.4383	20.1812	0.586658	0.1392	0.99965	NEUTRAL
XLOC_000031	PLEKHN1	1	966496	982093	0.515123	0.462333	-0.155983	0.79055	0.99965	NEUTRAL
XLOC_000032	ISG15	1	1001137	1014541	10.1754	9.69902	-0.0691736	0.84195	0.99965	NEUTRAL
XLOC_000033	AGRN	1	1020122	1056118	25.2784	29.5096	0.22328	0.5134	0.99965	NEUTRAL
XLOC_000041	B3GALT6	1	1232264	1235041	6.95774	5.29344	-0.394413	0.19495	0.99965	NEUTRAL
XLOC_000042	SCNN1D	1	1275222	1292029	3.64662	4.14987	0.186507	0.7821	0.99965	NEUTRAL
XLOC_000043	PUSL1	1	1292375	1324691	7.47351	6.92477	-0.110019	0.9087	0.99965	NEUTRAL
XLOC_000044	CPTP	1	1324755	1328897	8.2545	6.56734	-0.329872	0.26765	0.99965	NEUTRAL
XLOC_000047	RP4-758J18.2	1	1399521	1407313	4.47225	5.72986	0.357499	0.5256	0.99965	NEUTRAL
XLOC_000048	RP4-758J18.13	1	1409095	1410618	1.67339	1.47107	-0.185904	0.69505	0.99965	NEUTRAL
XLOC_000051	VWA1	1	1434860	1442882	3.12585	4.07591	0.382875	0.38615	0.99965	NEUTRAL
XLOC_000052	ATAD3C	1	1449688	1470158	0.794177	0.670771	-0.243641	0.79795	0.99965	NEUTRAL
XLOC_000053	ATAD3B	1	1471768	1497848	4.4783	4.9085	0.132334	0.69195	0.99965	NEUTRAL
XLOC_000054	ATAD3A	1	1512150	1534687	12.2764	11.4635	-0.0988364	0.7779	0.99965	NEUTRAL
XLOC_000057	MIB2	1	1613757	1630610	9.48875	13.3933	0.497224	0.3027	0.99965	NEUTRAL
XLOC_000060	RP11-345P4.6,RP11-345P4.7	1	1632094	1745992	1.18793	1.06676	-0.155217	0.9144	0.99965	NEUTRAL
XLOC_000061	RP1-283E3.4	1	1632094	1745992	2.33932	3.24958	0.474168	0.70565	0.99965	NEUTRAL
XLOC_000067	SKI	1	2228694	2310119	27.0517	21.7535	-0.314472	0.241	0.99965	NEUTRAL
XLOC_000068	RER1	1	2391774	2413797	66.2598	59.136	-0.164097	0.61055	0.99965	NEUTRAL
XLOC_000071	TNFRSF14	1	2549919	2565382	7.24123	7.45563	0.042095	0.9028	0.99965	NEUTRAL
XLOC_000074	FAM213B	1	2586490	2801721	6.98023	6.92311	-0.0118549	0.9742	0.99965	NEUTRAL
XLOC_000081	TPRG1L	1	3625001	3630127	31.0547	27.219	-0.190198	0.47735	0.99965	NEUTRAL
XLOC_000087	RP1-286D6.5	1	3778557	3796504	1.7944	1.8164	0.0175845	0.9741	0.99965	NEUTRAL
XLOC_000088	DFFB	1	3857266	3885429	2.45831	2.05429	-0.259032	0.5998	0.99965	NEUTRAL
XLOC_000096	KCNAB2	1	5862810	6101193	2.11787	1.38852	-0.609063	0.2757	0.99965	NEUTRAL
XLOC_000101	ESPN	1	6424787	6520061	0.438479	0.871796	0.991482	0.55545	0.99965	NEUTRAL
XLOC_000105	ZBTB48	1	6580000	6589280	6.60877	4.43804	-0.57446	0.1515	0.99965	NEUTRAL
XLOC_000106	PHF13	1	6590723	6624033	9.92675	9.11972	-0.122332	0.80575	0.99965	NEUTRAL
XLOC_000107	THAP3	1	6624865	6701924	6.11001	6.47378	0.0834339	0.87365	0.99965	NEUTRAL
XLOC_000109	CAMTA1	1	6785323	7769706	35.8711	30.5268	-0.232746	0.47975	0.99965	NEUTRAL
XLOC_000112	CAMTA1-IT1	1	6785323	7769706	0.43847	0.32555	-0.429598	0.6902	0.99965	NEUTRAL
XLOC_000113	VAMP3	1	7771268	7781432	76.709	65.0902	-0.236956	0.3877	0.99965	NEUTRAL
XLOC_000115	PER3	1	7784319	7853512	2.57586	2.05828	-0.323616	0.49655	0.99965	NEUTRAL
XLOC_000117	PARK7	1	7954290	7985505	175.249	168.865	-0.0535367	0.8423	0.99965	NEUTRAL
XLOC_000121	SLC45A1	1	8317825	8344167	1.22559	0.771568	-0.667608	0.1796	0.99965	NEUTRAL
XLOC_000135	H6PD	1	9234774	9271337	10.9933	9.26008	-0.247524	0.362	0.99965	NEUTRAL
XLOC_000136	SPSB1	1	9292879	9369532	6.88477	5.20755	-0.402803	0.27415	0.99965	NEUTRAL
XLOC_000137	SLC25A33	1	9539481	9585179	2.26166	2.46136	0.122071	0.7121	0.99965	NEUTRAL
XLOC_000139	TMEM201	1	9588921	9614873	4.55883	4.24141	-0.10412	0.7246	0.99965	NEUTRAL
XLOC_000140	PIK3CD	1	9651731	9824526	4.65708	3.22773	-0.528906	0.6445	0.99965	NEUTRAL
XLOC_000144	NMNAT1	1	9922112	9985501	7.15869	8.08811	0.176108	0.72275	0.99965	NEUTRAL
XLOC_000148	UBE4B	1	10032831	10181239	8.91925	8.78869	-0.021273	0.9542	0.99965	NEUTRAL
XLOC_000151	KIF1B	1	10210804	10381603	11.4117	11.4672	0.00699209	0.98295	0.99965	NEUTRAL
XLOC_000154	PGD	1	10398591	10420144	77.5536	61.5767	-0.332808	0.21235	0.99965	NEUTRAL
XLOC_000155	APITD1,APITD1-CORT,CORT	1	10429880	10452153	5.70462	4.91096	-0.216126	0.57995	0.99965	NEUTRAL
XLOC_000156	RP5-1113E3.3	1	10456521	10630758	2.46624	2.18972	-0.171568	0.18185	0.99965	NEUTRAL
XLOC_000157	PEX14	1	10456521	10630758	9.35582	9.56376	0.0317149	0.94605	0.99965	NEUTRAL
XLOC_000161	TARDBP	1	11012343	11047233	56.486	65.3247	0.209735	0.466	0.99965	NEUTRAL
XLOC_000170	UBIAD1	1	11273205	11296049	3.63618	3.61971	-0.00655119	0.9862	0.99965	NEUTRAL
XLOC_000173	FBXO44	1	11648366	11663327	13.563	13.5432	-0.00211419	0.9945	0.99965	NEUTRAL
XLOC_000174	FBXO6	1	11664123	11674354	3.64445	2.84866	-0.355421	0.35785	0.99965	NEUTRAL
XLOC_000176	AGTRAP	1	11736083	11754802	29.4666	24.3035	-0.277915	0.33485	0.99965	NEUTRAL
XLOC_000178	CLCN6	1	11761786	11848345	4.37848	4.04052	-0.115891	0.8073	0.99965	NEUTRAL
XLOC_000181	PLOD1	1	11934204	11975538	173.967	187.087	0.104893	0.7047	0.99965	NEUTRAL
XLOC_000182	MFN2	1	11980180	12013514	23.5329	21.2321	-0.148431	0.57895	0.99965	NEUTRAL
XLOC_000183	MIIP	1	12019465	12032045	5.48063	6.07937	0.149578	0.6553	0.99965	NEUTRAL
XLOC_000186	TNFRSF1B	1	12166942	12209228	2.30262	1.22777	-0.907238	0.05785	0.99965	NEUTRAL
XLOC_000188	VPS13D	1	12230066	12512047	7.12958	5.92268	-0.267567	0.4556	0.99965	NEUTRAL
XLOC_000215	PDPN	1	13583464	13617957	17.8722	12.6412	-0.499587	0.1527	0.99965	NEUTRAL
XLOC_000216	PRDM2	1	13700197	13825079	7.69402	6.15871	-0.321109	0.3401	0.99965	NEUTRAL
XLOC_000217	KAZN	1	14598703	15152464	2.21827	2.64822	0.255586	0.47165	0.99965	NEUTRAL
XLOC_000218	TMEM51	1	15152531	15220480	0.746311	0.787343	0.0772158	0.88085	0.99965	NEUTRAL
XLOC_000221	EFHD2	1	15409894	15430343	18.5107	12.9765	-0.512462	0.0651	0.99965	NEUTRAL
XLOC_000224	DNAJC16	1	15526812	15603626	8.77075	6.8348	-0.359802	0.5306	0.99965	NEUTRAL
XLOC_000227	DDI2,RSC1A1	1	15617499	15669044	5.43036	4.27005	-0.346793	0.36545	0.99965	NEUTRAL
XLOC_000228	PLEKHM2	1	15684331	15749896	21.5944	18.234	-0.244022	0.3795	0.99965	NEUTRAL
XLOC_000231	FBLIM1	1	15756606	15786594	62.809	69.9887	0.156149	0.65395	0.99965	NEUTRAL
XLOC_000235	SPEN	1	15834478	15940460	6.49075	6.77725	0.0623144	0.86325	0.99965	NEUTRAL
XLOC_000245	SZRD1	1	16352574	16437424	47.1311	43.2963	-0.122438	0.7518	0.99965	NEUTRAL
XLOC_000247	NECAP2	1	16440671	16460078	24.4783	20.5656	-0.251271	0.3878	0.99965	NEUTRAL
XLOC_000254	MST1P2	1	16645621	16650289	0.616513	0.846201	0.45687	0.38685	0.99965	NEUTRAL
XLOC_000258	CROCC	1	16740272	16972979	5.1449	5.81002	0.175401	0.7794	0.99965	NEUTRAL
XLOC_000263	RP11-108M9.5	1	16740272	16972979	0.766046	1.45122	0.92176	0.6766	0.99965	NEUTRAL
XLOC_000267	RP11-380J14.1	1	17189782	17197617	0.890835	1.01066	0.182067	0.64925	0.99965	NEUTRAL
XLOC_000268	PADI1	1	17205125	17246005	0.772692	0.968079	0.325232	0.5404	0.99965	NEUTRAL
XLOC_000273	RP1-20B21.4	1	17406759	17439724	8.09448	8.32371	0.0402876	0.34245	0.99965	NEUTRAL
XLOC_000274	ARHGEF10L	1	17539834	17697874	9.35954	9.19296	-0.0259081	0.92695	0.99965	NEUTRAL
XLOC_000287	MRTO4	1	19210500	19260128	12.7019	13.8073	0.120393	0.865	0.99965	NEUTRAL
XLOC_000288	RP4-657E11.10	1	19297079	19297903	0.973005	1.01525	0.0613147	0.91905	0.99965	NEUTRAL
XLOC_000289	PQLC2	1	19312325	19329300	6.12612	5.82447	-0.0728456	0.8374	0.99965	NEUTRAL
XLOC_000292	MINOS1,MINOS1-NBL1,NBL1	1	19596976	19658456	141.551	155.909	0.139386	0.72255	0.99965	NEUTRAL
XLOC_000293	RP5-1056L3.3	1	19596976	19658456	0.453231	0.455494	0.00718543	0.86045	0.99965	NEUTRAL
XLOC_000296	OTUD3	1	19882512	19912945	2.2318	2.91808	0.386813	0.4409	0.99965	NEUTRAL
XLOC_000298	PLA2G5	1	20028178	20091190	0.833866	0.84777	0.0238574	0.96695	0.99965	NEUTRAL
XLOC_000307	PINK1	1	20633454	20661544	12.1331	9.75893	-0.31415	0.7427	0.99965	NEUTRAL
XLOC_000317	NBPF3	1	21440127	21485005	3.40884	3.53977	0.0543764	0.89105	0.99965	NEUTRAL
XLOC_000318	ALPL	1	21509371	21578412	0.596935	0.584695	-0.0298903	0.95755	0.99965	NEUTRAL
XLOC_000330	LINC00339	1	22025187	22031223	6.73147	5.51719	-0.286988	0.4479	0.99965	NEUTRAL
XLOC_000331	CDC42	1	22052626	22092946	92.6929	82.6201	-0.165967	0.54755	0.99965	NEUTRAL
XLOC_000335	ZBTB40	1	22451850	22531157	2.83995	3.05657	0.106049	0.70545	0.99965	NEUTRAL
XLOC_000341	EPHB2	1	22710838	22921500	9.39132	9.75297	0.054514	0.8532	0.99965	NEUTRAL
XLOC_000343	KDM1A	1	23019447	23177808	23.1975	23.3829	0.0114835	0.9805	0.99965	NEUTRAL
XLOC_000349	ZNF436-AS1	1	23359447	23371839	2.60228	3.11398	0.25898	0.80415	0.99965	NEUTRAL
XLOC_000354	RPL11	1	23691778	23696425	696.46	818.391	0.232751	0.387	0.99965	NEUTRAL
XLOC_000355	TCEB3	1	23743154	23778287	12.8445	11.868	-0.114073	0.7075	0.99965	NEUTRAL
XLOC_000356	PITHD1	1	23778404	23788232	19.4316	17.0733	-0.186657	0.5011	0.99965	NEUTRAL
XLOC_000357	LYPLA2	1	23790969	23795539	20.0026	17.4816	-0.194353	0.52385	0.99965	NEUTRAL
XLOC_000360	PNRC2	1	23959108	23963462	22.0399	20.9447	-0.073534	0.81925	0.99965	NEUTRAL
XLOC_000366	NIPAL3	1	24307555	24472976	17.1494	14.6285	-0.229376	0.41215	0.99965	NEUTRAL
XLOC_000367	RCAN3	1	24502350	24556024	0.993042	1.66963	0.749601	0.2318	0.99965	NEUTRAL
XLOC_000370	SRRM1	1	24631715	24673267	23.055	22.2933	-0.0484651	0.871	0.99965	NEUTRAL
XLOC_000371	CLIC4	1	24745356	24844324	417.181	307.149	-0.441734	0.1453	0.99965	NEUTRAL
XLOC_000377	TMEM50A	1	25242236	25430192	84.217	63.5741	-0.405672	0.26985	0.99965	NEUTRAL
XLOC_000379	TMEM57	1	25430857	25500209	6.85523	7.12544	0.0557751	0.86795	0.99965	NEUTRAL
XLOC_000380	LDLRAP1	1	25543579	25568886	12.8505	11.9976	-0.099086	0.72905	0.99965	NEUTRAL
XLOC_000383	MTFR1L,RP1-317E23.6,SEPN1	1	25800175	25859458	55.1613	49.0016	-0.170825	0.5742	0.99965	NEUTRAL
XLOC_000392	EXTL1	1	26019883	26036464	3.87184	6.82541	0.817895	0.053	0.99965	NEUTRAL
XLOC_000394	PDIK1L	1	26111164	26125543	1.33851	0.997477	-0.424271	0.37985	0.99965	NEUTRAL
XLOC_000396	ZNF593	1	26169870	26172060	0.901196	0.899103	-0.00335538	0.9769	0.99965	NEUTRAL
XLOC_000400	CEP85	1	26234152	26279038	1.83705	2.25444	0.295381	0.45705	0.99965	NEUTRAL
XLOC_000401	SH3BGRL3	1	26279175	26320523	264.265	257.329	-0.0383706	0.90235	0.99965	NEUTRAL
XLOC_000405	DHDDS	1	26432281	26471294	11.7851	13.5693	0.203382	0.5606	0.99965	NEUTRAL
XLOC_000406	HMGN2	1	26472449	26475972	159.422	155.575	-0.0352433	0.8901	0.99965	NEUTRAL
XLOC_000407	RPS6KA1	1	26529760	26575030	0.646844	0.634646	-0.0274667	0.9612	0.99965	NEUTRAL
XLOC_000410	ARID1A	1	26696032	26782104	13.9701	14.6956	0.0730423	0.8014	0.99965	NEUTRAL
XLOC_000411	PIGV	1	26787471	26798398	4.74333	4.9348	0.0570923	0.87175	0.99965	NEUTRAL
XLOC_000413	ZDHHC18	1	26826709	26857602	6.20817	6.17205	-0.00841809	0.98355	0.99965	NEUTRAL
XLOC_000416	NUDC	1	26890487	26946862	22.7149	21.7532	-0.0624085	0.8306	0.99965	NEUTRAL
XLOC_000419	TRNP1	1	26993706	27000898	0.974763	1.04037	0.0939748	0.8488	0.99965	NEUTRAL
XLOC_000423	WDTC1	1	27234515	27308633	17.2205	15.7018	-0.133198	0.62025	0.99965	NEUTRAL
XLOC_000425	TMEM222	1	27322144	27336400	20.266	18.3854	-0.140501	0.6204	0.99965	NEUTRAL
XLOC_000430	GPR3	1	27392643	27395814	0.537747	0.313203	-0.779828	0.2243	0.99965	NEUTRAL
XLOC_000436	FAM76A	1	27725978	27763122	3.17553	3.01637	-0.0741818	0.8754	0.99965	NEUTRAL
XLOC_000439	STX12	1	27773182	27824452	17.8493	16.392	-0.122876	0.67065	0.99965	NEUTRAL
XLOC_000444	PPP1R8	1	27830777	27851676	16.5928	18.2464	0.137058	0.65365	0.99965	NEUTRAL
XLOC_000446	THEMIS2	1	27872542	27886685	1.65718	1.76724	0.0927682	0.85895	0.99965	NEUTRAL
XLOC_000448	XKR8	1	27934992	27968096	4.64499	3.81326	-0.284653	0.3752	0.99965	NEUTRAL
XLOC_000451	ATPIF1	1	28236108	28246906	61.7591	65.4211	0.0831043	0.78035	0.99965	NEUTRAL
XLOC_000453	SESN2	1	28259526	28282491	12.8871	9.52281	-0.436471	0.12525	0.99965	NEUTRAL
XLOC_000454	MED18	1	28329001	28335967	7.39422	6.65146	-0.152726	0.64995	0.99965	NEUTRAL
XLOC_000455	PHACTR4	1	28369602	28500369	4.33564	4.64354	0.098981	0.73575	0.99965	NEUTRAL
XLOC_000458	RCC1	1	28505942	28539300	33.4385	35.0045	0.0660275	0.87445	0.99965	NEUTRAL
XLOC_000459	SNORA73B	1	28505942	28539300	19.7441	22.5209	0.189844	0.9167	0.99965	NEUTRAL
XLOC_000461	TRNAU1AP	1	28553084	28582983	10.4632	11.1089	0.0863979	0.86	0.99965	NEUTRAL
XLOC_000462	RAB42	1	28589322	28643085	0.337004	0.485884	0.527849	0.6677	0.99965	NEUTRAL
XLOC_000465	GMEB1	1	28668731	28719353	3.067	3.21795	0.0693129	0.85635	0.99965	NEUTRAL
XLOC_000467	YTHDF2	1	28736620	28769775	26.4856	23.506	-0.172178	0.5215	0.99965	NEUTRAL
XLOC_000469	EPB41	1	28887090	29123935	3.43826	2.54087	-0.436354	0.43885	0.99965	NEUTRAL
XLOC_000473	PTPRU	1	29236515	29326813	9.22734	9.08824	-0.0219135	0.9454	0.99965	NEUTRAL
XLOC_000485	ZCCHC17	1	31296981	31364953	15.5657	16.4941	0.0835877	0.7735	0.99965	NEUTRAL
XLOC_000486	SERINC2	1	31409564	31434680	124.431	117.571	-0.0818083	0.76585	0.99965	NEUTRAL
XLOC_000490	TINAGL1	1	31576484	31587686	5.5924	8.32512	0.574004	0.0761	0.99965	NEUTRAL
XLOC_000492	RP11-73M7.6,RP11-73M7.9	1	31617685	31704319	1.33623	1.59813	0.258211	0.79125	0.99965	NEUTRAL
XLOC_000495	KHDRBS1	1	32013828	32102866	31.7562	28.793	-0.141319	0.6243	0.99965	NEUTRAL
XLOC_000496	TMEM39B	1	32013828	32102866	4.14825	4.54464	0.131663	0.8952	0.99965	NEUTRAL
XLOC_000498	KPNA6	1	32108037	32176568	16.0843	14.3332	-0.166294	0.5303	0.99965	NEUTRAL
XLOC_000499	TXLNA	1	32179685	32198285	20.0408	18.3608	-0.126311	0.62815	0.99965	NEUTRAL
XLOC_000500	CCDC28B	1	32200385	32208687	4.26006	3.72154	-0.194974	0.7044	0.99965	NEUTRAL
XLOC_000501	IQCC	1	32200385	32208687	0.993013	0.830279	-0.258216	0.69685	0.99965	NEUTRAL
XLOC_000503	EIF3I	1	32209093	32231604	89.8672	84.222	-0.0935971	0.7357	0.99965	NEUTRAL
XLOC_000504	FAM167B	1	32247232	32248856	0.340266	0.655316	0.945528	0.2861	0.99965	NEUTRAL
XLOC_000506	HDAC1	1	32292085	32333635	32.4391	31.9829	-0.0204325	0.94785	0.99965	NEUTRAL
XLOC_000510	RP1-27O5.3,ZBTB8A,ZBTB8B	1	32465056	32650903	1.50215	1.61389	0.10351	0.83495	0.99965	NEUTRAL
XLOC_000512	RBBP4	1	32651141	32703596	33.8151	39.1375	0.210886	0.6907	0.99965	NEUTRAL
XLOC_000513	KIAA1522	1	32741884	32774970	8.34422	6.35119	-0.393752	0.23375	0.99965	NEUTRAL
XLOC_000514	S100PBP	1	32775236	32858879	7.72133	7.56027	-0.0304109	0.96045	0.99965	NEUTRAL
XLOC_000519	AZIN2	1	33081103	33120530	1.60392	1.96333	0.291701	0.58025	0.99965	NEUTRAL
XLOC_000521	ZNF362	1	33256544	33300719	4.60348	4.4041	-0.0638784	0.8403	0.99965	NEUTRAL
XLOC_000523	RP11-415J8.3	1	33306765	33431052	1.9477	2.06529	0.0845752	0.9346	0.99965	NEUTRAL
XLOC_000526	ZSCAN20	1	33472644	33496507	1.18974	0.99137	-0.263153	0.51525	0.99965	NEUTRAL
XLOC_000538	ZMYM1	1	35059785	35115859	3.89048	3.26375	-0.253418	0.5487	0.99965	NEUTRAL
XLOC_000541	ZMYM4	1	35268966	35422058	8.60373	8.40637	-0.0334789	0.9073	0.99965	NEUTRAL
XLOC_000546	NCDN	1	35433489	35567274	11.0357	9.04083	-0.287652	0.5655	0.99965	NEUTRAL
XLOC_000549	AGO4	1	35808171	35857890	2.18216	3.85779	0.822021	0.11985	0.99965	NEUTRAL
XLOC_000550	AGO1	1	35869807	35929610	2.42092	3.07243	0.343828	0.2595	0.99965	NEUTRAL
XLOC_000551	AGO3	1	35930717	36072500	3.75006	3.79707	0.0179712	0.97105	0.99965	NEUTRAL
XLOC_000553	ADPRHL2	1	36088874	36093932	14.8568	14.7205	-0.0132945	0.9619	0.99965	NEUTRAL
XLOC_000554	MAP7D1	1	36136569	36180849	52.3418	54.3619	0.0546328	0.8755	0.99965	NEUTRAL
XLOC_000556	THRAP3	1	36224415	36305357	34.8413	35.6494	0.0330773	0.9235	0.99965	NEUTRAL
XLOC_000558	SH3D21	1	36306386	36329221	9.45176	11.3918	0.269343	0.47495	0.99965	NEUTRAL
XLOC_000564	ZC3H12A	1	37474551	37484379	3.27907	3.82035	0.220415	0.62425	0.99965	NEUTRAL
XLOC_000567	DNALI1	1	37556918	37595935	2.18614	1.70033	-0.362569	0.74365	0.99965	NEUTRAL
XLOC_000570	MANEAL	1	37793801	37801137	0.425187	0.438227	0.0435801	0.9412	0.99965	NEUTRAL
XLOC_000571	C1orf122	1	37802943	37809454	35.2556	29.5777	-0.253345	0.4613	0.99965	NEUTRAL
XLOC_000578	UTP11L	1	38009257	38024824	13.3461	11.4787	-0.217467	0.55765	0.99965	NEUTRAL
XLOC_000579	RP5-884C9.2	1	38047313	38119025	0.524266	0.467681	-0.164773	0.8655	0.99965	NEUTRAL
XLOC_000584	RP5-864K19.4	1	38838197	38941799	0.658745	0.503111	-0.388841	0.8533	0.99965	NEUTRAL
XLOC_000586	AKIRIN1	1	38991222	39006059	22.8065	20.8238	-0.131212	0.643	0.99965	NEUTRAL
XLOC_000587	NDUFS5	1	39026317	39034636	154.879	182.206	0.23443	0.36535	0.99965	NEUTRAL
XLOC_000588	MACF1	1	39081315	39487177	54.9465	68.718	0.322663	0.31825	0.99965	NEUTRAL
XLOC_000592	RP11-69E11.8	1	39560815	39576790	2.04144	2.24191	0.13514	0.8982	0.99965	NEUTRAL
XLOC_000594	PPIE	1	39692181	39788861	21.0181	23.7389	0.175622	0.55355	0.99965	NEUTRAL
XLOC_000598	MFSD2A	1	39955111	39969968	4.12709	4.53078	0.134633	0.7171	0.99965	NEUTRAL
XLOC_000600	CAP1	1	40040232	40072649	221.92	222.819	0.00583352	0.9829	0.99965	NEUTRAL
XLOC_000602	RLF	1	40161372	40240921	4.94166	4.91502	-0.00779571	0.97805	0.99965	NEUTRAL
XLOC_000605	ZMPSTE24	1	40258106	40294184	38.8948	30.8647	-0.33362	0.21225	0.99965	NEUTRAL
XLOC_000606	SMAP2	1	40344849	40423326	10.0304	8.39077	-0.257506	0.36905	0.99965	NEUTRAL
XLOC_000608	ZFP69B	1	40450101	40463718	0.664746	0.836072	0.330824	0.53515	0.99965	NEUTRAL
XLOC_000609	RP1-228H13.5	1	40464318	40466767	1.03292	0.847368	-0.285674	0.5495	0.99965	NEUTRAL
XLOC_000611	ZFP69	1	40477214	40508661	1.12953	1.0147	-0.154676	0.7387	0.99965	NEUTRAL
XLOC_000612	EXO5	1	40508740	40517174	1.07038	1.07777	0.00993705	0.9866	0.99965	NEUTRAL
XLOC_000613	ZNF684	1	40531560	40548169	1.62315	1.71933	0.0830494	0.89335	0.99965	NEUTRAL
XLOC_000615	NFYC	1	40690379	40771603	11.2448	10.1619	-0.146094	0.63005	0.99965	NEUTRAL
XLOC_000622	CTPS1	1	40979334	41012565	23.7105	22.0411	-0.105326	0.7352	0.99965	NEUTRAL
XLOC_000635	CCDC30,PPCS	1	42430328	42654664	23.4707	18.0048	-0.382481	0.2345	0.99965	NEUTRAL
XLOC_000639	PPIH	1	42658424	42676758	11.7665	10.6764	-0.140262	0.6976	0.99965	NEUTRAL
XLOC_000641	YBX1	1	42682426	42702349	353.548	341.284	-0.0509308	0.8532	0.99965	NEUTRAL
XLOC_000642	C1orf50	1	42767268	42798230	4.8747	5.43474	0.156896	0.6988	0.99965	NEUTRAL
XLOC_000643	ERMAP	1	42807051	42846422	2.42887	2.13899	-0.183353	0.63775	0.99965	NEUTRAL
XLOC_000644	ZNF691	1	42846572	42852477	1.79023	1.85548	0.051653	0.9045	0.99965	NEUTRAL
XLOC_000646	SLC2A1-AS1	1	42925374	42983358	0.327477	0.395723	0.273094	0.90985	0.99965	NEUTRAL
XLOC_000655	CDC20	1	43358954	43363203	0.51184	0.368427	-0.474315	0.6068	0.99965	NEUTRAL
XLOC_000656	RP1-92O14.6	1	43383916	43389808	0.695594	1.18505	0.768631	0.4835	0.99965	NEUTRAL
XLOC_000657	SZT2	1	43389881	43456995	2.1774	3.04341	0.483081	0.2488	0.99965	NEUTRAL
XLOC_000660	PTPRF	1	43525186	43623666	42.057	44.838	0.0923772	0.74	0.99965	NEUTRAL
XLOC_000661	KDM4A	1	43650157	43931165	9.82224	12.6271	0.362401	0.2683	0.99965	NEUTRAL
XLOC_000662	ST3GAL3	1	43650157	43931165	11.5989	10.7152	-0.11433	0.84765	0.99965	NEUTRAL
XLOC_000664	ARTN	1	43933319	43937241	0.634791	0.519456	-0.289281	0.7042	0.99965	NEUTRAL
XLOC_000665	IPO13	1	43946938	43968022	9.05045	9.7093	0.101378	0.7536	0.99965	NEUTRAL
XLOC_000666	DPH2	1	43969999	43973369	8.10298	8.38187	0.0488202	0.88855	0.99965	NEUTRAL
XLOC_000667	ATP6V0B	1	43974486	43978295	83.327	76.0295	-0.132226	0.63965	0.99965	NEUTRAL
XLOC_000668	B4GALT2	1	43978942	43991170	39.804	37.3151	-0.0931539	0.7333	0.99965	NEUTRAL
XLOC_000669	CCDC24	1	43991358	44115913	1.28619	2.54098	0.982288	0.2083	0.99965	NEUTRAL
XLOC_000672	DMAP1	1	44213454	44220681	9.27349	8.04174	-0.205606	0.5362	0.99965	NEUTRAL
XLOC_000674	RNF220	1	44405193	44674555	22.5767	18.2473	-0.307155	0.3307	0.99965	NEUTRAL
XLOC_000678	RPS8	1	44739817	44778779	866.84	908.559	0.0678154	0.8088	0.99965	NEUTRAL
XLOC_000680	PLK3	1	44800224	44806675	17.6254	14.485	-0.283095	0.3893	0.99965	NEUTRAL
XLOC_000681	BTBD19	1	44808481	44815585	3.29838	3.78049	0.196814	0.6565	0.99965	NEUTRAL
XLOC_000684	UROD	1	45012146	45015575	46.5357	43.2567	-0.105413	0.71025	0.99965	NEUTRAL
XLOC_000687	TOE1	1	45329162	45491166	2.05644	1.56547	-0.393551	0.4566	0.99965	NEUTRAL
XLOC_000689	MMACHC	1	45493865	45523047	1.13692	1.36434	0.263075	0.85865	0.99965	NEUTRAL
XLOC_000691	AKR1A1	1	45550542	45570049	17.875	19.1924	0.102591	0.75235	0.99965	NEUTRAL
XLOC_000692	NASP	1	45583845	45618904	17.2158	15.2208	-0.177685	0.5874	0.99965	NEUTRAL
XLOC_000693	TMEM69	1	45627303	45750650	5.5199	7.39618	0.422138	0.71215	0.99965	NEUTRAL
XLOC_000695	MAST2	1	45786986	46036124	13.386	12.0266	-0.154501	0.60485	0.99965	NEUTRAL
XLOC_000699	TSPAN1	1	46040139	46185958	0.432545	0.840884	0.959057	0.40875	0.99965	NEUTRAL
XLOC_000700	LURAP1	1	46188681	46221261	0.543287	0.521937	-0.057839	0.394	0.99965	NEUTRAL
XLOC_000701	RAD54L	1	46247687	46303608	0.295033	0.477432	0.694419	0.47825	0.99965	NEUTRAL
XLOC_000702	UQCRH	1	46303630	46316776	182.449	199.998	0.132488	0.6173	0.99965	NEUTRAL
XLOC_000703	NSUN4	1	46340176	46365152	5.90377	4.78092	-0.304349	0.4387	0.99965	NEUTRAL
XLOC_000705	FAAH	1	46394264	46413848	2.42815	2.20462	-0.139323	0.81445	0.99965	NEUTRAL
XLOC_000720	CMPK1	1	47333796	47378839	63.0741	58.4192	-0.110604	0.70375	0.99965	NEUTRAL
XLOC_000748	CDKN2C	1	50960744	50974633	4.87107	4.93837	0.0197949	0.9591	0.99965	NEUTRAL
XLOC_000754	RNF11	1	51236270	51273455	103.215	83.5646	-0.304695	0.4213	0.99965	NEUTRAL
XLOC_000760	OSBPL9	1	51561865	51878937	20.986	23.0244	0.133736	0.80385	0.99965	NEUTRAL
XLOC_000767	RP11-91A18.4	1	52020130	52090716	1.17226	2.24895	0.939961	0.59185	0.99965	NEUTRAL
XLOC_000769	BTF3L4	1	52020130	52090716	36.7637	34.7715	-0.080377	0.8663	0.99965	NEUTRAL
XLOC_000770	ZFYVE9	1	52142093	52366193	5.92578	6.32075	0.0930923	0.81335	0.99965	NEUTRAL
XLOC_000776	PRPF38A	1	52404563	52553487	5.59558	8.31596	0.571596	0.33875	0.99965	NEUTRAL
XLOC_000779	GPX7	1	52602371	52609051	9.64406	8.47925	-0.185704	0.57415	0.99965	NEUTRAL
XLOC_000780	FAM159A	1	52633343	52669683	0.466222	0.392693	-0.247617	0.79985	0.99965	NEUTRAL
XLOC_000783	ZYG11B	1	52726466	52827342	8.80697	7.2228	-0.286087	0.28695	0.99965	NEUTRAL
XLOC_000786	RP4-631H13.6	1	52895909	52927212	1.74784	1.16344	-0.587176	0.5984	0.99965	NEUTRAL
XLOC_000787	SCP2	1	52927228	53051703	59.9474	48.2609	-0.312842	0.30155	0.99965	NEUTRAL
XLOC_000791	PODN	1	53062051	53085502	0.93769	0.579433	-0.694469	0.19405	0.99965	NEUTRAL
XLOC_000794	CPT2	1	53196428	53220617	2.40125	2.15814	-0.153999	0.7665	0.99965	NEUTRAL
XLOC_000804	LRRC42	1	53946076	53968168	18.1622	17.8631	-0.0239527	0.9309	0.99965	NEUTRAL
XLOC_000805	TCEANC2	1	54053586	54112519	1.35405	0.825254	-0.714374	0.32815	0.99965	NEUTRAL
XLOC_000808	MRPL37	1	54133073	54413479	32.7742	30.3556	-0.110597	0.75155	0.99965	NEUTRAL
XLOC_000816	MROH7,MROH7-TTC4,TTC4	1	54641753	54742657	10.7834	11.2362	0.0593443	0.8619	0.99965	NEUTRAL
XLOC_000819	RP11-67L3.4,RP11-67L3.5	1	54849632	54888850	2.87941	3.74298	0.378413	0.8647	0.99965	NEUTRAL
XLOC_000845	LINC01358	1	59020386	59044614	0.430219	0.226261	-0.927081	0.6412	0.99965	NEUTRAL
XLOC_000848	FGGY	1	59296637	59789182	4.22336	4.49751	0.090735	0.84345	0.99965	NEUTRAL
XLOC_000853	NFIA	1	60865258	61462793	1.21716	2.03447	0.741131	0.1463	0.99965	NEUTRAL
XLOC_000858	INADL	1	61742476	62163920	2.13141	1.77394	-0.264852	0.57065	0.99965	NEUTRAL
XLOC_000867	USP1	1	62436296	62451804	6.36072	5.29995	-0.263212	0.363	0.99965	NEUTRAL
XLOC_000872	ATG4C	1	62784134	62865513	4.05558	3.59215	-0.175062	0.7026	0.99965	NEUTRAL
XLOC_000881	ALG6	1	63367589	63438562	3.48398	2.70861	-0.363181	0.3589	0.99965	NEUTRAL
XLOC_000882	EFCAB7	1	63440769	63660245	1.72325	1.55658	-0.146751	0.9111	0.99965	NEUTRAL
XLOC_000883	PGM1	1	63440769	63660245	50.7562	51.0832	0.00926358	0.9733	0.99965	NEUTRAL
XLOC_000885	ROR1	1	63774021	64181498	8.81779	9.94217	0.173144	0.6363	0.99965	NEUTRAL
XLOC_000887	CACHD1	1	64470791	64693058	1.86341	1.69158	-0.139573	0.66965	0.99965	NEUTRAL
XLOC_000889	RAVER2	1	64745094	64966504	1.41539	1.97608	0.481439	0.7177	0.99965	NEUTRAL
XLOC_000892	AK4	1	65147548	65232145	22.5159	25.3012	0.16826	0.6668	0.99965	NEUTRAL
XLOC_000894	DNAJC6	1	65248218	65416006	1.50057	1.02098	-0.55555	0.28495	0.99965	NEUTRAL
XLOC_000895	LEPR,LEPROT	1	65420586	65641559	45.4256	41.0781	-0.145135	0.7276	0.99965	NEUTRAL
XLOC_000898	SGIP1	1	66533382	66748299	1.95669	1.88145	-0.0565674	0.92545	0.99965	NEUTRAL
XLOC_000902	MIER1	1	66924894	66988619	10.8514	9.98084	-0.120655	0.69095	0.99965	NEUTRAL
XLOC_000911	GADD45A	1	67685060	67688338	57.2246	50.9081	-0.168739	0.5248	0.99965	NEUTRAL
XLOC_000923	SRSF11	1	70205681	70253052	44.2019	59.1554	0.4204	0.23285	0.99965	NEUTRAL
XLOC_000924	HHLA3	1	70354804	70385339	8.07953	8.06438	-0.00270775	0.99355	0.99965	NEUTRAL
XLOC_000925	CTH	1	70411217	70439851	2.70817	2.0224	-0.421248	0.3649	0.99965	NEUTRAL
XLOC_000927	RP11-42O15.3	1	70445070	70445536	0.582155	0.988545	0.763904	0.4609	0.99965	NEUTRAL
XLOC_000943	FPGT,FPGT-TNNI3K,TNNI3K	1	74198211	74544428	3.78426	3.77772	-0.0024957	0.9961	0.99965	NEUTRAL
XLOC_000946	TYW3	1	74705481	74766678	7.84886	8.18539	0.0605673	0.88475	0.99965	NEUTRAL
XLOC_000953	ACADM,RABGGTB	1	75724346	75795079	92.5273	108.194	0.225667	0.4736	0.99965	NEUTRAL
XLOC_000963	ST6GALNAC5	1	76867440	77065711	0.505801	0.43231	-0.226505	0.7853	0.99965	NEUTRAL
XLOC_000969	AK5	1	77282050	77559969	37.5337	21.4397	-0.807902	0.04845	0.99965	NEUTRAL
XLOC_000973	FAM73A	1	77779623	77879539	8.12289	7.32753	-0.148666	0.6099	0.99965	NEUTRAL
XLOC_000976	NEXN	1	77881347	77943895	22.0253	25.1908	0.193732	0.51285	0.99965	NEUTRAL
XLOC_000977	DNAJB4,GIPC2	1	77979174	78138449	112.781	94.8948	-0.249123	0.46105	0.99965	NEUTRAL
XLOC_000980	PTGFR	1	78229598	78539749	1.52375	1.64682	0.112056	0.7432	0.99965	NEUTRAL
XLOC_000982	IFI44	1	78649795	78664078	4.31342	3.99103	-0.112074	0.79755	0.99965	NEUTRAL
XLOC_000996	ADGRL2	1	81306159	81992436	6.38524	7.21695	0.176648	0.69325	0.99965	NEUTRAL
XLOC_001005	PRKACB	1	84078061	84238498	12.7	11.8207	-0.103508	0.7354	0.99965	NEUTRAL
XLOC_001012	RPF1	1	84479258	84497790	14.0069	12.5627	-0.157	0.59335	0.99965	NEUTRAL
XLOC_001014	WDR63	1	84999146	85133138	1.20406	1.48146	0.299118	0.57305	0.99965	NEUTRAL
XLOC_001020	CYR61	1	85580760	85583962	961.936	848.009	-0.181862	0.56335	0.99965	NEUTRAL
XLOC_001024	CLCA2	1	86424085	86456558	0.503789	0.442151	-0.18828	0.7821	0.99965	NEUTRAL
XLOC_001028	SH3GLB1	1	86704569	86748184	44.6325	44.0874	-0.0177288	0.96225	0.99965	NEUTRAL
XLOC_001030	HS2ST1,RP5-1052I5.2	1	86914647	87169204	12.3912	11.375	-0.123443	0.79955	0.99965	NEUTRAL
XLOC_001034	LMO4	1	87328467	87348923	39.454	44.4294	0.171342	0.56935	0.99965	NEUTRAL
XLOC_001038	PKN2	1	88537512	88836255	10.7004	8.92484	-0.261768	0.43475	0.99965	NEUTRAL
XLOC_001046	LRRC8B	1	89524835	89936611	0.574507	0.302517	-0.925308	0.48205	0.99965	NEUTRAL
XLOC_001048	LRRC8C,LRRC8D,RP11-302M6.4	1	89524835	89936611	17.6399	16.6028	-0.0874165	0.784	0.99965	NEUTRAL
XLOC_001051	ZNF326	1	89995111	90035531	9.59414	12.0618	0.33022	0.27585	0.99965	NEUTRAL
XLOC_001057	CDC7	1	91500892	91525764	1.18687	0.802993	-0.563704	0.3879	0.99965	NEUTRAL
XLOC_001063	BTBD8	1	92080304	92147836	0.42192	0.326674	-0.369118	0.6245	0.99965	NEUTRAL
XLOC_001065	KIAA1107	1	92167051	92184723	0.795814	0.635329	-0.324927	0.4541	0.99965	NEUTRAL
XLOC_001069	RPAP2	1	92246401	92402056	4.18104	3.39559	-0.300196	0.66835	0.99965	NEUTRAL
XLOC_001072	RPL5	1	92832024	92961522	670.144	727.974	0.119416	0.6745	0.99965	NEUTRAL
XLOC_001078	MTF2	1	93079234	93139081	3.76083	4.19926	0.159086	0.65215	0.99965	NEUTRAL
XLOC_001079	CCDC18	1	93149741	93369498	6.73207	7.09632	0.0760211	0.9731	0.99965	NEUTRAL
XLOC_001080	DR1	1	93149741	93369498	22.4851	18.6004	-0.273635	0.6201	0.99965	NEUTRAL
XLOC_001082	FNBP1L	1	93448130	93554661	3.65359	4.65138	0.348344	0.24375	0.99965	NEUTRAL
XLOC_001090	RP11-148B18.3	1	94333266	94334848	0.417156	0.420393	0.0111523	0.8558	0.99965	NEUTRAL
XLOC_001091	ABCD3	1	94418454	94518666	15.7673	13.8234	-0.189828	0.50965	0.99965	NEUTRAL
XLOC_001094	RP4-639F20.1	1	94927565	94963270	3.46254	2.86296	-0.274322	0.5625	0.99965	NEUTRAL
XLOC_001096	RWDD3,TMEM56,TMEM56-RWDD3	1	95117337	95278940	6.12512	5.62397	-0.123149	0.7503	0.99965	NEUTRAL
XLOC_001108	PTBP2	1	96721664	96823738	4.67469	5.65962	0.275836	0.482	0.99965	NEUTRAL
XLOC_001120	SNX7	1	98661700	98760500	28.7565	24.0479	-0.257979	0.34895	0.99965	NEUTRAL
XLOC_001125	PALMD	1	99645942	99694541	0.805548	0.925744	0.200643	0.6826	0.99965	NEUTRAL
XLOC_001129	AGL	1	99850083	99924023	3.62569	3.71289	0.0342887	0.902	0.99965	NEUTRAL
XLOC_001130	SLC35A3	1	99968382	100026979	6.15625	5.81107	-0.0832476	0.81265	0.99965	NEUTRAL
XLOC_001133	HIAT1	1	100038096	100132955	20.522	15.204	-0.432718	0.11435	0.99965	NEUTRAL
XLOC_001135	TRMT13	1	100133149	100178273	3.88158	5.19231	0.419732	0.3744	0.99965	NEUTRAL
XLOC_001139	RTCA	1	100266206	100292769	29.1857	27.5992	-0.0806365	0.7901	0.99965	NEUTRAL
XLOC_001142	CDC14A	1	100351733	100520277	0.790471	0.513636	-0.621967	0.1884	0.99965	NEUTRAL
XLOC_001145	VCAM1	1	100719741	100739045	12.341	13.8434	0.165734	0.55655	0.99965	NEUTRAL
XLOC_001146	RP4-549L20.3	1	100872371	100895998	0.498022	0.374138	-0.412639	0.76475	0.99965	NEUTRAL
XLOC_001147	SLC30A7	1	100896075	100981753	6.08633	4.70317	-0.371941	0.28255	0.99965	NEUTRAL
XLOC_001148	RP11-421L21.2	1	100989622	101087268	0.432334	0.264602	-0.708324	0.5893	0.99965	NEUTRAL
XLOC_001149	RP11-421L21.3	1	100989622	101087268	3.63852	3.16227	-0.20239	0.7675	0.99965	NEUTRAL
XLOC_001162	AMY2B,RNPC3	1	103525690	103579534	5.19676	4.64377	-0.162317	0.69085	0.99965	NEUTRAL
XLOC_001176	PRMT6	1	107056678	107059294	4.56305	4.40655	-0.0503496	0.8742	0.99965	NEUTRAL
XLOC_001182	RP11-483I13.5,RP11-483I13.6	1	108134035	108202743	1.17277	1.87648	0.678109	0.53925	0.99965	NEUTRAL
XLOC_001188	FAM102B	1	108560088	108644900	1.03671	1.0881	0.0698038	0.84785	0.99965	NEUTRAL
XLOC_001189	PRPF38B	1	108692322	108701803	7.95648	8.66016	0.122265	0.68345	0.99965	NEUTRAL
XLOC_001191	STXBP3	1	108746673	108809526	15.5067	12.9376	-0.261324	0.38815	0.99965	NEUTRAL
XLOC_001193	GPSM2	1	108815897	108963484	2.09214	1.34354	-0.638938	0.496	0.99965	NEUTRAL
XLOC_001197	TMEM167B	1	109087970	109096934	27.7659	26.7973	-0.0512255	0.8791	0.99965	NEUTRAL
XLOC_001200	SARS	1	109213917	109238169	104.471	112.549	0.107452	0.68465	0.99965	NEUTRAL
XLOC_001201	CELSR2	1	109250018	109275750	0.605154	0.923171	0.609296	0.17235	0.99965	NEUTRAL
XLOC_001203	ATXN7L2	1	109483478	109492804	1.01468	1.54838	0.609733	0.21685	0.99965	NEUTRAL
XLOC_001204	CYB561D1	1	109494051	109502932	3.04083	4.26071	0.486629	0.18295	0.99965	NEUTRAL
XLOC_001206	AMPD2,GNAI3	1	109548610	109632051	25.6775	28.8536	0.168247	0.7009	0.99965	NEUTRAL
XLOC_001208	GSTM1,GSTM2,GSTM4	1	109656080	109709551	44.333	39.9972	-0.148482	0.62945	0.99965	NEUTRAL
XLOC_001212	CSF1	1	109910241	109930992	45.3716	42.7496	-0.0858814	0.75245	0.99965	NEUTRAL
XLOC_001213	AHCYL1	1	109984685	110023741	30.0933	28.7245	-0.06716	0.8099	0.99965	NEUTRAL
XLOC_001214	STRIP1	1	110031576	110074641	17.9693	17.0309	-0.0773774	0.82205	0.99965	NEUTRAL
XLOC_001215	RP4-773N10.4	1	110031576	110074641	1.71446	1.74651	0.0267215	0.9725	0.99965	NEUTRAL
XLOC_001219	KCNC4	1	110211342	110283100	2.02835	1.85472	-0.129101	0.77005	0.99965	NEUTRAL
XLOC_001221	RBM15	1	110286374	110346681	1.72077	1.67097	-0.0423659	0.91005	0.99965	NEUTRAL
XLOC_001222	LAMTOR5-AS1	1	110347115	110443817	0.792018	0.653725	-0.276851	0.6081	0.99965	NEUTRAL
XLOC_001230	RP11-96K19.5	1	110943466	110964649	0.517228	0.714822	0.466782	0.73995	0.99965	NEUTRAL
XLOC_001232	CEPT1	1	111117332	111185102	12.3648	9.76734	-0.340201	0.52185	0.99965	NEUTRAL
XLOC_001233	CHI3L2	1	111187173	111243440	3.49173	3.27122	-0.0941145	0.8157	0.99965	NEUTRAL
XLOC_001242	ATP5F1	1	111438637	111462773	77.5018	85.1383	0.135578	0.6689	0.99965	NEUTRAL
XLOC_001243	C1orf162	1	111473791	111478512	0.770585	0.678897	-0.182762	0.76915	0.99965	NEUTRAL
XLOC_001244	RAP1A	1	111483347	111768016	37.1865	35.1821	-0.0799367	0.8502	0.99965	NEUTRAL
XLOC_001245	FAM212B-AS1	1	111483347	111768016	0.777829	1.01419	0.382805	0.7229	0.99965	NEUTRAL
XLOC_001246	DDX20	1	111483347	111768016	4.8418	4.00279	-0.274539	0.6759	0.99965	NEUTRAL
XLOC_001251	CTTNBP2NL	1	112396180	112463456	11.5283	11.819	0.0359259	0.90455	0.99965	NEUTRAL
XLOC_001252	WNT2B	1	112466540	112671619	0.97312	0.701096	-0.473006	0.7328	0.99965	NEUTRAL
XLOC_001253	CAPZA1	1	112466540	112671619	67.501	63.4856	-0.0884805	0.7908	0.99965	NEUTRAL
XLOC_001254	MOV10	1	112673140	112700746	12.8931	13.3058	0.0454614	0.88915	0.99965	NEUTRAL
XLOC_001260	SLC16A1-AS1	1	112911846	112999496	1.34123	1.20972	-0.148885	0.93405	0.99965	NEUTRAL
XLOC_001261	RP11-389O22.1	1	113008253	113073105	0.620451	0.461893	-0.425758	0.75165	0.99965	NEUTRAL
XLOC_001262	LRIG2	1	113073208	113132260	3.09788	3.463	0.160745	0.69745	0.99965	NEUTRAL
XLOC_001266	MAGI3	1	113390748	113685923	1.75308	1.71828	-0.0289242	0.93785	0.99965	NEUTRAL
XLOC_001270	DCLRE1B	1	113761831	113914086	1.59172	1.05947	-0.587238	0.43945	0.99965	NEUTRAL
XLOC_001271	HIPK1	1	113923999	113977869	11.0414	10.5765	-0.0620529	0.8185	0.99965	NEUTRAL
XLOC_001272	OLFML3	1	113979390	113982254	53.5445	53.1052	-0.0118862	0.9643	0.99965	NEUTRAL
XLOC_001289	VANGL1	1	115641952	115698224	4.79009	4.01332	-0.255257	0.4782	0.99965	NEUTRAL
XLOC_001292	SLC22A15	1	115976497	116070054	2.00241	1.60611	-0.318164	0.44	0.99965	NEUTRAL
XLOC_001296	ATP1A1	1	116372667	116418622	84.1291	73.4818	-0.195218	0.47585	0.99965	NEUTRAL
XLOC_001302	PTGFRN	1	116910056	116990358	14.3305	12.406	-0.208055	0.43515	0.99965	NEUTRAL
XLOC_001304	TTF2	1	117060302	117107453	5.50219	5.93952	0.110339	0.84345	0.99965	NEUTRAL
XLOC_001308	MAN1A2	1	117367448	117528872	10.0564	10.8301	0.106934	0.78575	0.99965	NEUTRAL
XLOC_001311	FAM46C	1	117605933	117628372	0.351865	0.420431	0.256846	0.58235	0.99965	NEUTRAL
XLOC_001312	WDR3	1	117929719	118185223	10.11	12.7218	0.331526	0.5406	0.99965	NEUTRAL
XLOC_001315	RP11-418J17.1	1	119031215	119327303	4.02624	4.00979	-0.00590369	0.9931	0.99965	NEUTRAL
XLOC_001326	PHGDH	1	119659797	119744215	21.5557	24.6282	0.192244	0.4911	0.99965	NEUTRAL
XLOC_001333	NBPF8P	1	120436352	120467739	1.14165	1.2519	0.132998	0.7207	0.99965	NEUTRAL
XLOC_001337	AC253572.1	1	120723922	120793877	0.404751	0.347401	-0.220435	0.7996	0.99965	NEUTRAL
XLOC_001338	NBPF26	1	120805417	120841481	0.947881	0.731338	-0.374169	0.37835	0.99965	NEUTRAL
XLOC_001345	SRGAP2C	1	121167645	121463129	2.41993	2.3191	-0.061398	0.84185	0.99965	NEUTRAL
XLOC_001366	SRGAP2D	1	143975086	144068350	0.612882	0.906124	0.564101	0.42115	0.99965	NEUTRAL
XLOC_001373	PFN1P6	1	144421385	144461674	1.87341	1.96096	0.0658993	0.5131	0.99965	NEUTRAL
XLOC_001388	GPR89A	1	145607989	145670648	2.60192	2.38265	-0.127009	0.83485	0.99965	NEUTRAL
XLOC_001389	CD160	1	145719470	145824077	0.243968	0.405501	0.733015	0.61015	0.99965	NEUTRAL
XLOC_001390	POLR3C	1	145824087	145842505	11.1345	11.9173	0.0980226	0.7455	0.99965	NEUTRAL
XLOC_001391	NUDT17	1	145845628	145859836	0.962591	0.960678	-0.00286958	0.99765	0.99965	NEUTRAL
XLOC_001393	GNRHR2	1	145919012	145978848	0.396735	0.694116	0.807003	0.67195	0.99965	NEUTRAL
XLOC_001394	CH17-270A2.2,POLR3GL	1	145919012	145978848	15.991	13.1997	-0.276752	0.68895	0.99965	NEUTRAL
XLOC_001406	NBPF12	1	146938743	146996202	1.45871	1.64972	0.177529	0.6075	0.99965	NEUTRAL
XLOC_001409	CHD1L	1	147172770	147517875	13.7691	11.8412	-0.217609	0.47105	0.99965	NEUTRAL
XLOC_001411	PDIA3P1	1	147172770	147517875	0.617343	0.528634	-0.223803	0.90135	0.99965	NEUTRAL
XLOC_001417	BCL9	1	147541411	147626216	4.31101	4.58569	0.0891143	0.83105	0.99965	NEUTRAL
XLOC_001420	RP11-433J22.2	1	147756198	147773362	0.470049	0.587381	0.321485	0.85165	0.99965	NEUTRAL
XLOC_001424	GPR89B	1	147928392	147993521	0.686663	0.776575	0.177524	0.72135	0.99965	NEUTRAL
XLOC_001428	PFN1P4	1	148102045	148152322	0.369957	0.415076	0.166019	0.56715	0.99965	NEUTRAL
XLOC_001447	PDE4DIP	1	148808180	149048286	40.5717	38.7948	-0.0646126	0.87545	0.99965	NEUTRAL
XLOC_001448	RP4-791M13.3	1	149048575	149051273	0.869616	0.908024	0.0623519	0.9467	0.99965	NEUTRAL
XLOC_001450	RP11-326G21.1	1	149176021	149321732	0.437737	0.249833	-0.809101	0.71655	0.99965	NEUTRAL
XLOC_001453	NBPF19	1	149390622	149556361	1.77823	1.65222	-0.106032	0.7565	0.99965	NEUTRAL
XLOC_001455	LINC00869	1	149606333	149747812	0.660015	0.421404	-0.647295	0.34805	0.99965	NEUTRAL
XLOC_001468	BOLA1	1	149887523	149900798	3.55883	3.59503	0.0145984	0.9714	0.99965	NEUTRAL
XLOC_001470	VPS45	1	150067292	150145327	18.6322	17.3442	-0.103345	0.7599	0.99965	NEUTRAL
XLOC_001471	PLEKHO1	1	150149182	150164720	22.6785	21.2037	-0.097007	0.7655	0.99965	NEUTRAL
XLOC_001475	C1orf54	1	150265398	150280916	40.0376	40.0334	-0.000154214	0.99955	0.99965	NEUTRAL
XLOC_001476	CIART	1	150282542	150287093	5.56155	4.99375	-0.155363	0.6719	0.99965	NEUTRAL
XLOC_001477	MRPS21	1	150293719	150308979	18.6904	18.3157	-0.0292142	0.91875	0.99965	NEUTRAL
XLOC_001478	PRPF3	1	150321475	150353195	9.51131	10.3512	0.122086	0.70315	0.99965	NEUTRAL
XLOC_001479	RPRD2	1	150363090	150476566	7.06978	6.23347	-0.18163	0.5228	0.99965	NEUTRAL
XLOC_001480	TARS2	1	150487363	150507609	6.201	5.65995	-0.131713	0.7099	0.99965	NEUTRAL
XLOC_001481	ECM1	1	150508061	150513789	114.317	102.5	-0.15741	0.5535	0.99965	NEUTRAL
XLOC_001483	ADAMTSL4	1	150548561	150579738	9.1807	7.34368	-0.3221	0.7493	0.99965	NEUTRAL
XLOC_001488	SETDB1	1	150926262	150975534	7.17414	6.75707	-0.0864074	0.92385	0.99965	NEUTRAL
XLOC_001489	RP11-316M1.12	1	150926262	150975534	63.4415	41.562	-0.610161	0.42045	0.99965	NEUTRAL
XLOC_001492	PRUNE	1	151008419	151035713	6.08554	4.81795	-0.336966	0.2837	0.99965	NEUTRAL
XLOC_001494	C1orf56	1	151047739	151070325	0.934657	0.773114	-0.273756	0.84215	0.99965	NEUTRAL
XLOC_001495	MLLT11	1	151047739	151070325	6.35671	5.74119	-0.14693	0.7869	0.99965	NEUTRAL
XLOC_001496	GABPB2	1	151070577	151125542	0.990796	1.27027	0.358473	0.55965	0.99965	NEUTRAL
XLOC_001497	SCNM1,TNFAIP8L2	1	151156628	151195321	17.7032	17.3326	-0.0305227	0.95005	0.99965	NEUTRAL
XLOC_001498	PIP5K1A	1	151197948	151249536	21.8954	22.6508	0.0489372	0.8836	0.99965	NEUTRAL
XLOC_001499	PSMD4	1	151254702	151267479	43.414	48.2667	0.152866	0.56145	0.99965	NEUTRAL
XLOC_001500	ZNF687	1	151280023	151327715	5.34645	4.80908	-0.152821	0.75055	0.99965	NEUTRAL
XLOC_001502	RP11-126K1.8	1	151340639	151348027	0.908789	0.841972	-0.110173	0.45655	0.99965	NEUTRAL
XLOC_001504	PSMB4	1	151399533	151401944	137.356	126.878	-0.11448	0.67225	0.99965	NEUTRAL
XLOC_001507	TUFT1	1	151540304	151583583	12.4248	12.4745	0.00575837	0.98325	0.99965	NEUTRAL
XLOC_001511	SNX27	1	151612037	151699091	5.31051	5.25857	-0.0141801	0.9621	0.99965	NEUTRAL
XLOC_001562	CHTOP	1	153618786	153646306	21.8251	21.1716	-0.0438577	0.91645	0.99965	NEUTRAL
XLOC_001563	SNAPIN	1	153658653	153671048	17.7951	16.3322	-0.123764	0.8532	0.99965	NEUTRAL
XLOC_001566	INTS3,SLC27A3	1	153728066	153780157	11.6962	12.0982	0.0487593	0.8894	0.99965	NEUTRAL
XLOC_001570	CREB3L4	1	153959098	153977688	1.18177	1.50126	0.345219	0.74475	0.99965	NEUTRAL
XLOC_001571	RP11-422P24.11	1	153977742	153979160	0.87198	0.783209	-0.154898	0.7904	0.99965	NEUTRAL
XLOC_001572	RPS27	1	153990758	153992150	1326.14	1435.07	0.113885	0.67925	0.99965	NEUTRAL
XLOC_001575	UBAP2L	1	154206705	154271510	48.3254	50.4466	0.061978	0.8826	0.99965	NEUTRAL
XLOC_001577	HAX1	1	154272510	154275875	34.1975	34.5122	0.0132161	0.962	0.99965	NEUTRAL
XLOC_001583	ATP8B2	1	154325552	154351307	22.2985	22.5977	0.0192263	0.94775	0.99965	NEUTRAL
XLOC_001584	IL6R	1	154402327	154469450	0.511137	0.299437	-0.771456	0.2754	0.99965	NEUTRAL
XLOC_001591	CKS1B	1	154974652	154979249	13.8496	14.1063	0.0264948	0.93625	0.99965	NEUTRAL
XLOC_001593	FLAD1	1	154983337	154993111	10.3758	9.57068	-0.116532	0.71975	0.99965	NEUTRAL
XLOC_001595	ZBTB7B	1	155002629	155033781	13.33	13.0861	-0.0266426	0.9485	0.99965	NEUTRAL
XLOC_001596	ADAM15,DCST1	1	155033823	155062775	36.3164	33.222	-0.128482	0.6417	0.99965	NEUTRAL
XLOC_001597	EFNA3,EFNA4,RP11-540D14.8	1	155063730	155087538	3.94676	4.67293	0.243659	0.52265	0.99965	NEUTRAL
XLOC_001599	EFNA1	1	155127459	155134857	0.293203	0.442375	0.593371	0.4827	0.99965	NEUTRAL
XLOC_001600	SLC50A1	1	155135343	155138857	24.0176	16.1292	-0.574418	0.09265	0.99965	NEUTRAL
XLOC_001602	TRIM46	1	155169407	155192916	0.987685	1.50087	0.603676	0.62335	0.99965	NEUTRAL
XLOC_001606	RP11-263K19.4	1	155195587	155227422	2.69012	4.08847	0.603889	0.67875	0.99965	NEUTRAL
XLOC_001607	MTX1	1	155195587	155227422	11.4208	10.0365	-0.18641	0.7173	0.99965	NEUTRAL
XLOC_001609	HCN3	1	155262867	155301434	0.989718	1.0514	0.087228	0.9206	0.99965	NEUTRAL
XLOC_001610	FDPS	1	155308747	155331114	25.0164	24.8436	-0.0100019	0.98	0.99965	NEUTRAL
XLOC_001611	RUSC1	1	155308747	155331114	10.6449	12.6651	0.250692	0.55805	0.99965	NEUTRAL
XLOC_001614	ASH1L-AS1	1	155335267	155563944	0.35263	0.542322	0.620994	0.77515	0.99965	NEUTRAL
XLOC_001615	DAP3P1	1	155586643	155602197	0.384839	0.554345	0.52653	0.73895	0.99965	NEUTRAL
XLOC_001616	MSTO1	1	155609775	155739010	7.03171	6.06653	-0.213004	0.8165	0.99965	NEUTRAL
XLOC_001617	DAP3	1	155609775	155739010	32.009	34.1587	0.0937747	0.8176	0.99965	NEUTRAL
XLOC_001618	MSTO2P	1	155745828	155859400	0.537728	0.63649	0.243261	0.8999	0.99965	NEUTRAL
XLOC_001620	SYT11	1	155859508	155885199	26.5344	21.2903	-0.317672	0.24055	0.99965	NEUTRAL
XLOC_001624	LAMTOR2	1	156054751	156058510	32.964	30.8841	-0.0940274	0.76255	0.99965	NEUTRAL
XLOC_001627	LMNA	1	156082572	156140089	240.928	232.131	-0.0536644	0.8616	0.99965	NEUTRAL
XLOC_001629	SLC25A44	1	156193931	156212796	6.19866	5.08851	-0.284712	0.3997	0.99965	NEUTRAL
XLOC_001630	BGLAP,PMF1,PMF1-BGLAP	1	156212981	156248117	23.3936	23.4391	0.00280527	0.9928	0.99965	NEUTRAL
XLOC_001631	TMEM79	1	156282934	156295689	1.74947	1.28936	-0.440256	0.5915	0.99965	NEUTRAL
XLOC_001638	APOA1BP	1	156591761	156594299	21.0319	20.114	-0.0643841	0.8263	0.99965	NEUTRAL
XLOC_001642	RRNAD1	1	156721890	156736960	6.92923	6.61785	-0.0663326	0.9164	0.99965	NEUTRAL
XLOC_001643	PRCC	1	156742106	156800817	21.9567	22.5578	0.0389644	0.9559	0.99965	NEUTRAL
XLOC_001645	PEAR1	1	156893697	156916434	15.1355	18.7383	0.308048	0.253	0.99965	NEUTRAL
XLOC_001655	KIRREL	1	157993272	158100262	35.9585	39.7902	0.146081	0.61035	0.99965	NEUTRAL
XLOC_001673	IFI16	1	158999967	159055155	25.2643	22.8042	-0.147803	0.6465	0.99965	NEUTRAL
XLOC_001689	DUSP23	1	159780931	159782543	12.0463	10.7336	-0.166458	0.6435	0.99965	NEUTRAL
XLOC_001693	LINC01133	1	159961217	159979061	8.42104	8.54339	0.0208103	0.9484	0.99965	NEUTRAL
XLOC_001699	CASQ1	1	160190555	160201886	0.428873	0.619181	0.529811	0.4029	0.99965	NEUTRAL
XLOC_001700	PEA15	1	160202198	160215376	252.658	257.559	0.0277199	0.93615	0.99965	NEUTRAL
XLOC_001701	RP11-574F21.2	1	160215714	160286348	0.558365	0.509625	-0.131774	0.8978	0.99965	NEUTRAL
XLOC_001703	NCSTN	1	160289272	160358952	71.1566	69.0083	-0.0442272	0.91625	0.99965	NEUTRAL
XLOC_001707	RP11-404F10.2,SETP9	1	160670147	160711851	0.271825	0.488117	0.844548	0.18155	0.99965	NEUTRAL
XLOC_001718	NIT1	1	161100555	161132688	9.82651	9.46428	-0.0541866	0.9272	0.99965	NEUTRAL
XLOC_001719	UFC1	1	161152775	161159349	39.7382	48.2291	0.279375	0.3406	0.99965	NEUTRAL
XLOC_001720	USP21	1	161159449	161165723	5.70992	6.17434	0.112813	0.78675	0.99965	NEUTRAL
XLOC_001721	PPOX	1	161166409	161178013	10.3186	8.11232	-0.347059	0.56735	0.99965	NEUTRAL
XLOC_001722	NDUFS2	1	161184307	161214395	28.8909	32.6155	0.174944	0.58875	0.99965	NEUTRAL
XLOC_001724	TOMM40L	1	161225938	161238302	3.83453	4.67812	0.286882	0.52925	0.99965	NEUTRAL
XLOC_001726	SDHC	1	161314256	161375340	109.011	95.173	-0.195843	0.5527	0.99965	NEUTRAL
XLOC_001733	FCRLA	1	161706971	161714352	0.280655	0.446012	0.668286	0.3501	0.99965	NEUTRAL
XLOC_001736	DUSP12	1	161749757	161757238	11.7223	11.9388	0.0263991	0.92985	0.99965	NEUTRAL
XLOC_001737	ATF6	1	161766293	161964070	8.93071	8.57875	-0.0580068	0.8291	0.99965	NEUTRAL
XLOC_001745	UHMK1	1	162497250	162529629	21.4224	15.8238	-0.437029	0.102	0.99965	NEUTRAL
XLOC_001746	UAP1	1	162561505	162599842	74.8231	58.9324	-0.344423	0.19835	0.99965	NEUTRAL
XLOC_001748	DDR2	1	162631372	162787400	33.6147	40.4785	0.268065	0.3134	0.99965	NEUTRAL
XLOC_001750	HSD17B7	1	162790701	162812817	2.64164	2.61326	-0.0155801	0.97375	0.99965	NEUTRAL
XLOC_001752	RGS4	1	163068774	163076802	373.892	309.333	-0.27346	0.474	0.99965	NEUTRAL
XLOC_001762	PBX1	1	164555583	164899296	1.99366	1.82458	-0.127861	0.804	0.99965	NEUTRAL
XLOC_001776	MGST3	1	165630860	165661796	81.2129	66.6842	-0.284362	0.3201	0.99965	NEUTRAL
XLOC_001783	UCK2	1	165724292	165911618	14.4177	13.6348	-0.0805456	0.8921	0.99965	NEUTRAL
XLOC_001795	POGK	1	166839446	166856344	6.01662	5.94965	-0.0161487	0.961	0.99965	NEUTRAL
XLOC_001801	POU2F1	1	167220828	167427345	1.61821	1.41934	-0.189186	0.61	0.99965	NEUTRAL
XLOC_001806	MPZL1	1	167721191	167791919	80.7074	77.9253	-0.0506102	0.8897	0.99965	NEUTRAL
XLOC_001808	DCAF6	1	167916728	168075843	27.8855	28.5835	0.0356718	0.9236	0.99965	NEUTRAL
XLOC_001810	TIPRL	1	168178932	168202114	14.9225	14.7355	-0.0181929	0.95995	0.99965	NEUTRAL
XLOC_001813	SFT2D2	1	168225937	168253025	4.79974	5.13228	0.0966444	0.84035	0.99965	NEUTRAL
XLOC_001814	TBX19	1	168281039	168314426	1.75272	2.48554	0.503961	0.19085	0.99965	NEUTRAL
XLOC_001824	ATP1B1	1	169105696	169367967	7.57398	5.92504	-0.354226	0.31975	0.99965	NEUTRAL
XLOC_001826	BLZF1	1	169367969	169460669	5.38692	5.20954	-0.048306	0.8815	0.99965	NEUTRAL
XLOC_001828	C1orf112	1	169662006	169894267	0.845198	0.80228	-0.0751838	0.9375	0.99965	NEUTRAL
XLOC_001836	GORAB	1	170460452	170553446	6.48191	5.61703	-0.20661	0.544	0.99965	NEUTRAL
XLOC_001838	PRRX1	1	170662727	170739419	58.248	48.8911	-0.252636	0.3933	0.99965	NEUTRAL
XLOC_001849	PRRC2C	1	171485550	171593511	24.062	28.7796	0.258291	0.5436	0.99965	NEUTRAL
XLOC_001854	METTL13	1	171781663	171814023	8.1703	9.92184	0.280219	0.45205	0.99965	NEUTRAL
XLOC_001860	SUCO	1	172532348	172611833	12.5926	9.91061	-0.345528	0.2096	0.99965	NEUTRAL
XLOC_001867	PRDX6	1	173477265	173488807	112.68	107.14	-0.0727234	0.7979	0.99965	NEUTRAL
XLOC_001870	KLHL20	1	173714940	173786702	6.25536	7.43891	0.249998	0.4842	0.99965	NEUTRAL
XLOC_001874	DARS2	1	173799549	173858546	1.79127	1.50607	-0.250196	0.58835	0.99965	NEUTRAL
XLOC_001876	ZBTB37	1	173863247	173903549	0.624293	0.622177	-0.00489766	0.99245	0.99965	NEUTRAL
XLOC_001879	RABGAP1L	1	174115299	174995308	6.81843	7.99202	0.229119	0.5562	0.99965	NEUTRAL
XLOC_001883	RABGAP1L-IT1	1	174115299	174995308	0.382369	0.52777	0.464942	0.34635	0.99965	NEUTRAL
XLOC_001885	CACYBP	1	174999162	175023425	26.3141	22.4272	-0.230587	0.5519	0.99965	NEUTRAL
XLOC_001895	PAPPA2	1	176463170	176845605	0.747329	1.29892	0.797496	0.1183	0.99965	NEUTRAL
XLOC_001902	RASAL2	1	178094140	178484147	5.8071	6.65997	0.197699	0.60725	0.99965	NEUTRAL
XLOC_001909	RALGPS2	1	178724305	178921841	15.178	15.8347	0.0611131	0.90165	0.99965	NEUTRAL
XLOC_001910	FAM20B	1	179025803	179076562	10.5223	7.72401	-0.446032	0.09935	0.99965	NEUTRAL
XLOC_001911	TOR3A	1	179081376	179098023	11.5796	10.8594	-0.0926415	0.80965	0.99965	NEUTRAL
XLOC_001919	SOAT1	1	179293713	179358680	11.9792	8.14655	-0.556274	0.22855	0.99965	NEUTRAL
XLOC_001927	TOR1AIP1	1	179881606	179925000	27.5877	23.3766	-0.238958	0.44315	0.99965	NEUTRAL
XLOC_001929	CEP350	1	179954737	180114880	7.07143	7.99549	0.177184	0.6389	0.99965	NEUTRAL
XLOC_001932	QSOX1	1	180154833	180204030	377.48	326.354	-0.209965	0.55345	0.99965	NEUTRAL
XLOC_001937	XPR1	1	180632003	180890251	12.7334	10.8445	-0.231655	0.48485	0.99965	NEUTRAL
XLOC_001939	KIAA1614	1	180913153	181023121	1.38147	1.68682	0.288105	0.80405	0.99965	NEUTRAL
XLOC_001942	MR1	1	181033424	181061938	14.1007	13.0224	-0.114775	0.73815	0.99965	NEUTRAL
XLOC_001943	IER5	1	181088711	181092899	10.7384	7.59259	-0.500116	0.07595	0.99965	NEUTRAL
XLOC_001961	DHX9	1	182839368	182887751	54.0586	53.2363	-0.0221134	0.93245	0.99965	NEUTRAL
XLOC_001962	LAMC1	1	183023459	183145592	121.169	138.391	0.191737	0.58985	0.99965	NEUTRAL
XLOC_001963	LAMC2	1	183186237	183244900	0.810084	0.887716	0.132028	0.78585	0.99965	NEUTRAL
XLOC_001965	SMG7	1	183460873	183598246	13.1505	13.4247	0.0297749	0.9283	0.99965	NEUTRAL
XLOC_001966	RGL1	1	183636084	183928531	6.86918	6.46665	-0.0871204	0.75615	0.99965	NEUTRAL
XLOC_001967	TSEN15	1	184051676	184074212	18.5484	15.5039	-0.258663	0.43435	0.99965	NEUTRAL
XLOC_001971	C1orf21	1	184387057	184629020	25.4375	18.3904	-0.468008	0.2588	0.99965	NEUTRAL
XLOC_001975	RNF2	1	185045363	185102608	7.48158	9.34379	0.320665	0.37085	0.99965	NEUTRAL
XLOC_001985	HMCN1	1	185734550	186190949	14.1491	24.0769	0.766941	0.27425	0.99965	NEUTRAL
XLOC_001987	C1orf27	1	186375757	186421378	6.04396	5.58074	-0.115039	0.76785	0.99965	NEUTRAL
XLOC_001994	PLA2G4A	1	186828952	186988981	7.83447	4.21253	-0.895148	0.0032	0.814483	NEUTRAL
XLOC_002024	RGS2	1	192809038	192812283	9.3857	5.72948	-0.71206	0.0423	0.99965	NEUTRAL
XLOC_002025	TROVE2	1	193012249	193091777	12.6245	15.4732	0.293547	0.49705	0.99965	NEUTRAL
XLOC_002026	CDC73	1	193122016	193253901	10.438	10.5778	0.019206	0.94265	0.99965	NEUTRAL
XLOC_002035	CFH	1	196651877	196747504	36.1264	42.049	0.219016	0.45495	0.99965	NEUTRAL
XLOC_002047	C1orf53	1	197902646	197907367	7.24306	7.17517	-0.0135853	0.97595	0.99965	NEUTRAL
XLOC_002048	LHX9	1	197911901	197935478	2.54496	1.42194	-0.839779	0.0838	0.99965	NEUTRAL
XLOC_002049	NEK7	1	198156962	198322420	185.218	154.838	-0.258465	0.3891	0.99965	NEUTRAL
XLOC_002068	RP11-469A15.2	1	200473919	200478293	0.640223	0.679161	0.0851802	0.89845	0.99965	NEUTRAL
XLOC_002070	CAMSAP2	1	200739557	200860704	14.7887	12.7504	-0.213954	0.4283	0.99965	NEUTRAL
XLOC_002081	RP11-134G8.5,RP11-134G8.6	1	201483529	201533608	0.343231	0.63525	0.888147	0.70765	0.99965	NEUTRAL
XLOC_002082	NAV1	1	201622884	201884294	35.9294	40.4736	0.171819	0.6748	0.99965	NEUTRAL
XLOC_002086	IPO9	1	201622884	201884294	12.3918	14.9737	0.273042	0.79185	0.99965	NEUTRAL
XLOC_002088	SHISA4	1	201888679	201892306	42.0796	40.6803	-0.0487922	0.86265	0.99965	NEUTRAL
XLOC_002090	TIMM17A	1	201955490	201970661	46.0166	44.8377	-0.0374393	0.8862	0.99965	NEUTRAL
XLOC_002093	RNPEP	1	201982371	202017188	19.6989	16.6399	-0.243469	0.3808	0.99965	NEUTRAL
XLOC_002103	PPP1R12B	1	202348698	202710417	7.14232	8.12737	0.186395	0.5893	0.99965	NEUTRAL
XLOC_002107	PCAT6	1	202810953	202812156	4.59785	5.01384	0.124956	0.7799	0.99965	NEUTRAL
XLOC_002110	HNRNPA1P59	1	202891099	202928636	0.290342	0.402473	0.471139	0.6178	0.99965	NEUTRAL
XLOC_002112	TMEM183A	1	203007385	203024848	29.1596	28.942	-0.0108082	0.9741	0.99965	NEUTRAL
XLOC_002113	PPFIA4	1	203026497	203078740	4.88215	8.66103	0.827021	0.06305	0.99965	NEUTRAL
XLOC_002114	ADORA1	1	203090653	203167405	2.76779	3.02828	0.129766	0.7218	0.99965	NEUTRAL
XLOC_002117	BTG2	1	203305490	203309602	6.881	6.14762	-0.16259	0.59945	0.99965	NEUTRAL
XLOC_002120	ATP2B4	1	203626560	203744081	44.8004	39.6947	-0.174563	0.531	0.99965	NEUTRAL
XLOC_002123	ZBED6,ZC3H11A	1	203795653	203854124	35.0235	34.9108	-0.00465174	0.9868	0.99965	NEUTRAL
XLOC_002124	SNRPE	1	203861602	203870550	66.666	60.5992	-0.137653	0.67285	0.99965	NEUTRAL
XLOC_002126	SOX13	1	204073114	204127743	0.953386	0.808391	-0.238007	0.60555	0.99965	NEUTRAL
XLOC_002127	RP11-74C13.4	1	204131061	204152003	0.94232	0.591081	-0.672862	0.66	0.99965	NEUTRAL
XLOC_002133	MDM4	1	204516378	204558120	2.55701	4.50649	0.817544	0.0807	0.99965	NEUTRAL
XLOC_002138	NFASC	1	204828650	205022822	74.2127	77.1814	0.0565875	0.86535	0.99965	NEUTRAL
XLOC_002139	RP11-494K3.2	1	204828650	205022822	0.771843	0.839271	0.120829	0.933	0.99965	NEUTRAL
XLOC_002144	TMCC2	1	205228175	205273343	1.04635	1.14072	0.124581	0.80085	0.99965	NEUTRAL
XLOC_002148	CDK18	1	205504594	205532793	0.393928	0.628709	0.67446	0.23165	0.99965	NEUTRAL
XLOC_002159	SRGAP2	1	206186178	206464443	16.5799	16.6155	0.0030969	0.99035	0.99965	NEUTRAL
XLOC_002160	IKBKE	1	206470475	206497728	4.57173	3.74011	-0.289658	0.5381	0.99965	NEUTRAL
XLOC_002163	RASSF5	1	206507529	206612463	1.40532	1.55345	0.144575	0.8329	0.99965	NEUTRAL
XLOC_002166	DYRK3	1	206634648	206684419	7.02577	4.777	-0.556551	0.0717	0.99965	NEUTRAL
XLOC_002167	MAPKAPK2	1	206684943	206734283	39.4097	31.4517	-0.325413	0.22335	0.99965	NEUTRAL
XLOC_002174	PFKFB2	1	207006844	207099993	1.49863	0.937742	-0.676385	0.26715	0.99965	NEUTRAL
XLOC_002179	CD55	1	207321507	207360966	12.6788	9.11064	-0.476798	0.1415	0.99965	NEUTRAL
XLOC_002185	CD46	1	207752056	207795513	44.9656	46.6241	0.0522517	0.8521	0.99965	NEUTRAL
XLOC_002196	G0S2	1	209661363	209734950	1.93383	1.19981	-0.688653	0.25625	0.99965	NEUTRAL
XLOC_002200	DIEXF	1	209828006	209857565	5.18433	4.07252	-0.348234	0.2356	0.99965	NEUTRAL
XLOC_002204	HHAT	1	210328251	210676296	1.70905	1.76816	0.0490585	0.9046	0.99965	NEUTRAL
XLOC_002208	RCOR3	1	211258376	211316385	8.76335	12.1284	0.468833	0.1735	0.99965	NEUTRAL
XLOC_002209	TRAF5	1	211326614	211374946	4.41924	7.43764	0.751047	0.01435	0.99965	NEUTRAL
XLOC_002210	LINC00467	1	211382802	211435333	1.4032	1.91152	0.446002	0.43895	0.99965	NEUTRAL
XLOC_002223	PPP2R5A	1	212285536	212361863	9.53886	6.79042	-0.490316	0.0885	0.99965	NEUTRAL
XLOC_002228	NENF	1	212432886	212446379	37.1756	39.3239	0.0810508	0.77025	0.99965	NEUTRAL
XLOC_002234	TATDN3	1	212791827	212816626	7.54787	7.01015	-0.106626	0.8047	0.99965	NEUTRAL
XLOC_002237	FLVCR1	1	212858254	212899363	3.14709	3.45301	0.133837	0.84395	0.99965	NEUTRAL
XLOC_002239	RPS6KC1	1	213051232	213274773	8.10747	7.69101	-0.076079	0.82135	0.99965	NEUTRAL
XLOC_002243	SMYD2	1	214281101	214337131	7.03109	6.37237	-0.141917	0.66185	0.99965	NEUTRAL
XLOC_002245	CENPF	1	214603194	214664588	0.801672	0.569405	-0.493556	0.586	0.99965	NEUTRAL
XLOC_002248	KCNK2	1	215005774	215237093	45.2628	29.9413	-0.596191	0.0476	0.99965	NEUTRAL
XLOC_002250	KCTD3	1	215567391	215621807	10.2829	9.6703	-0.088618	0.7807	0.99965	NEUTRAL
XLOC_002259	RRP15	1	218285286	218337983	6.84755	4.73626	-0.531839	0.45885	0.99965	NEUTRAL
XLOC_002261	TGFB2	1	218346234	218444619	48.2742	50.6569	0.0695065	0.86655	0.99965	NEUTRAL
XLOC_002263	LYPLAL1	1	219086601	219212865	16.7503	15.4419	-0.117332	0.76365	0.99965	NEUTRAL
XLOC_002269	IARS2	1	220094101	220148041	30.1625	27.7907	-0.118156	0.6508	0.99965	NEUTRAL
XLOC_002279	MARC2	1	220748224	220784815	3.32991	2.25427	-0.562823	0.30845	0.99965	NEUTRAL
XLOC_002280	MARC1	1	220786758	220819657	0.749502	0.910605	0.280893	0.72985	0.99965	NEUTRAL
XLOC_002283	HLX	1	220832762	220885059	6.74184	5.20289	-0.373829	0.39555	0.99965	NEUTRAL
XLOC_002289	MIA3	1	222618085	222668012	26.5962	26.9657	0.019909	0.95165	0.99965	NEUTRAL
XLOC_002290	BROX	1	222668012	222735196	13.2129	10.1	-0.387585	0.43985	0.99965	NEUTRAL
XLOC_002299	CAPN2	1	223701592	223776018	151.259	125.759	-0.266362	0.34095	0.99965	NEUTRAL
XLOC_002301	RP11-504P24.3	1	223992742	224010612	1.51299	2.20365	0.542495	0.3816	0.99965	NEUTRAL
XLOC_002303	FBXO28	1	224114086	224162047	10.1235	9.88931	-0.0337596	0.9081	0.99965	NEUTRAL
XLOC_002304	DEGS1	1	224175755	224193441	56.9178	45.9674	-0.308269	0.2495	0.99965	NEUTRAL
XLOC_002309	CNIH4	1	224356849	224379459	30.8991	36.9137	0.256593	0.4218	0.99965	NEUTRAL
XLOC_002310	CNIH3	1	224385142	224740549	7.51963	6.97992	-0.107451	0.92385	0.99965	NEUTRAL
XLOC_002314	DNAH14	1	224896261	225399292	3.00345	2.9432	-0.0292311	0.95275	0.99965	NEUTRAL
XLOC_002317	SRP9	1	225777812	225790466	93.7261	99.624	0.0880425	0.7528	0.99965	NEUTRAL
XLOC_002319	EPHX1	1	225810091	225882369	26.0102	19.3583	-0.426123	0.23465	0.99965	NEUTRAL
XLOC_002321	H3F3A	1	226060711	226072001	131.155	111.353	-0.236122	0.3737	0.99965	NEUTRAL
XLOC_002324	RP11-275I14.4	1	226144678	226186730	4.26054	3.68437	-0.20962	0.9035	0.99965	NEUTRAL
XLOC_002331	PSEN2	1	226870183	226896105	5.71778	3.55884	-0.684049	0.08215	0.99965	NEUTRAL
XLOC_002332	ADCK3	1	226897535	226987545	3.61503	3.34694	-0.111165	0.74255	0.99965	NEUTRAL
XLOC_002333	RP5-1087E8.3	1	226989864	227318474	2.54945	3.83611	0.589456	0.49695	0.99965	NEUTRAL
XLOC_002342	ZNF678	1	227563542	227677443	1.36934	1.17231	-0.22412	0.76855	0.99965	NEUTRAL
XLOC_002344	SNAP47	1	227728538	227781231	9.9363	10.0351	0.0142742	0.96925	0.99965	NEUTRAL
XLOC_002348	ARF1	1	228082659	228099212	255.496	258.926	0.0192369	0.9451	0.99965	NEUTRAL
XLOC_002350	GUK1	1	228139961	228148984	161.191	167.056	0.0515656	0.8556	0.99965	NEUTRAL
XLOC_002352	IBA57	1	228165814	228182257	1.07703	0.973614	-0.145642	0.845	0.99965	NEUTRAL
XLOC_002354	RP11-245P10.8	1	228393672	228406840	0.41718	0.630613	0.596086	0.48105	0.99965	NEUTRAL
XLOC_002359	RNF187	1	228486187	228495766	43.2722	46.439	0.101895	0.70515	0.99965	NEUTRAL
XLOC_002369	RAB4A,SPHAR	1	229258280	229305894	23.3195	25.8356	0.147819	0.69705	0.99965	NEUTRAL
XLOC_002376	URB2	1	229626233	229660199	2.50615	2.46781	-0.0222416	0.95015	0.99965	NEUTRAL
XLOC_002378	GALNT2	1	230057989	230282124	63.0531	58.9923	-0.0960412	0.8163	0.99965	NEUTRAL
XLOC_002379	COG2	1	230642488	230693982	5.47875	5.24506	-0.0628874	0.8331	0.99965	NEUTRAL
XLOC_002384	ARV1	1	230978980	231000595	9.87496	9.21841	-0.0992565	0.7575	0.99965	NEUTRAL
XLOC_002387	GNPAT	1	231241206	231277973	17.2289	15.0849	-0.191725	0.4897	0.99965	NEUTRAL
XLOC_002388	SPRTN	1	231332752	231355023	3.40464	2.46661	-0.464971	0.3752	0.99965	NEUTRAL
XLOC_002389	DISC1,TSNAX,TSNAX-DISC1	1	231528652	232041272	15.9811	15.7453	-0.0214443	0.95715	0.99965	NEUTRAL
XLOC_002400	NTPCR	1	232950604	233295727	24.3028	22.7738	-0.0937513	0.82245	0.99965	NEUTRAL
XLOC_002402	KCNK1	1	233614003	233672512	0.926782	0.834667	-0.151029	0.7811	0.99965	NEUTRAL
XLOC_002410	COA6	1	234372185	234384049	10.4923	8.35954	-0.327839	0.3892	0.99965	NEUTRAL
XLOC_002413	RP4-781K5.2	1	234604268	234609525	72.086	79.747	0.145711	0.77985	0.99965	NEUTRAL
XLOC_002422	GGPS1	1	235131182	235344532	13.5658	11.1127	-0.287763	0.61385	0.99965	NEUTRAL
XLOC_002425	TBCE	1	235367359	235448968	7.23853	6.71907	-0.107435	0.8059	0.99965	NEUTRAL
XLOC_002435	GPR137B	1	236142504	236281985	8.27104	8.08795	-0.0322939	0.92485	0.99965	NEUTRAL
XLOC_002438	LGALS8	1	236517999	236604504	23.7058	21.6557	-0.130493	0.84475	0.99965	NEUTRAL
XLOC_002440	MTR	1	236795280	236903981	6.24431	8.38083	0.424553	0.2045	0.99965	NEUTRAL
XLOC_002454	FMN2	1	240014347	240475189	12.5181	8.91268	-0.490084	0.1736	0.99965	NEUTRAL
XLOC_002482	RP11-261C10.5	1	243124427	243255348	1.98481	3.22955	0.702329	0.5656	0.99965	NEUTRAL
XLOC_002484	SDCCAG8	1	243256033	243851079	10.5278	8.93173	-0.237198	0.73185	0.99965	NEUTRAL
XLOC_002488	ZBTB18	1	244048938	244057476	5.12941	6.17477	0.267593	0.35725	0.99965	NEUTRAL
XLOC_002494	DESI2	1	244652934	244709033	12.6673	10.1584	-0.318427	0.24625	0.99965	NEUTRAL
XLOC_002495	COX20	1	244835321	244864542	4.35979	5.39641	0.307741	0.8959	0.99965	NEUTRAL
XLOC_002499	EFCAB2	1	244969349	245127164	4.94681	3.79928	-0.38077	0.4256	0.99965	NEUTRAL
XLOC_002502	KIF26B	1	245154984	245709431	3.94353	4.84802	0.297909	0.2832	0.99965	NEUTRAL
XLOC_002508	CNST	1	246566443	246668584	10.2005	11.5916	0.184447	0.5775	0.99965	NEUTRAL
XLOC_002512	SCCPDH	1	246724046	246768137	13.342	12.7377	-0.066873	0.8132	0.99965	NEUTRAL
XLOC_002523	NLRP3	1	247416155	247449108	0.485082	0.566254	0.223221	0.72765	0.99965	NEUTRAL
XLOC_002572	ZNF672	1	248838209	248849517	4.53354	4.05362	-0.161428	0.61935	0.99965	NEUTRAL
XLOC_002574	PGBD2	1	248906195	248919946	1.7274	1.64788	-0.0679892	0.8827	0.99965	NEUTRAL
XLOC_002576	WASH7P	1	11868	31109	0.589619	0.456335	-0.36969	0.59305	0.99965	NEUTRAL
XLOC_002579	RP11-34P13.7,RP11-34P13.8	1	89294	134836	0.879139	0.90961	0.0491577	0.9411	0.99965	NEUTRAL
XLOC_002580	RP11-34P13.15	1	135140	135895	0.667229	0.682561	0.0327756	0.92595	0.99965	NEUTRAL
XLOC_002581	RP11-34P13.16	1	137681	137965	2.56284	1.85127	-0.469227	0.6343	0.99965	NEUTRAL
XLOC_002583	RP11-34P13.13	1	141473	173862	1.68764	2.94502	0.803274	0.4198	0.99965	NEUTRAL
XLOC_002585	FO538757.2	1	184922	200322	1.22218	1.33848	0.13114	0.7945	0.99965	NEUTRAL
XLOC_002587	AP006222.2,RPL23AP21	1	257863	297502	0.757793	0.926819	0.290484	0.5822	0.99965	NEUTRAL
XLOC_002590	RP4-669L17.10,RP4-669L17.4	1	357382	501617	2.76096	1.59484	-0.791761	0.17585	0.99965	NEUTRAL
XLOC_002592	RP4-669L17.8	1	357382	501617	0.406975	0.566449	0.477004	0.6123	0.99965	NEUTRAL
XLOC_002600	RP11-206L10.1	1	726230	728147	0.693797	0.504908	-0.458494	0.5103	0.99965	NEUTRAL
XLOC_002603	RP11-206L10.2,RP11-206L10.5	1	759031	778626	2.91417	3.78718	0.378038	0.6458	0.99965	NEUTRAL
XLOC_002605	LINC00115	1	825137	859446	0.341459	0.616474	0.852328	0.5698	0.99965	NEUTRAL
XLOC_002606	FAM41C	1	868070	876903	0.76154	0.606695	-0.327949	0.74115	0.99965	NEUTRAL
XLOC_002607	RP11-54O7.3	1	916864	921016	1.07368	1.68064	0.646448	0.0845	0.99965	NEUTRAL
XLOC_002608	NOC2L	1	924879	959309	23.4661	22.2346	-0.0777753	0.77985	0.99965	NEUTRAL
XLOC_002609	PERM1	1	966496	982093	0.293358	0.388756	0.406206	0.7075	0.99965	NEUTRAL
XLOC_002616	C1orf159	1	1081817	1116361	3.41283	2.34749	-0.53985	0.15245	0.99965	NEUTRAL
XLOC_002620	SDF4	1	1216907	1232031	146.939	154.287	0.070394	0.80615	0.99965	NEUTRAL
XLOC_002621	FAM132A	1	1242445	1246722	1.37747	1.37637	-0.00115143	0.99825	0.99965	NEUTRAL
XLOC_002623	UBE2J2	1	1253908	1273885	25.5414	21.1172	-0.274416	0.4011	0.99965	NEUTRAL
XLOC_002624	ACAP3	1	1292375	1324691	11.551	18.4955	0.67916	0.1955	0.99965	NEUTRAL
XLOC_002626	CPSF3L	1	1292375	1324691	33.8452	36.2944	0.100797	0.82305	0.99965	NEUTRAL
XLOC_002627	DVL1	1	1331313	1349350	24.5317	22.6739	-0.113619	0.6802	0.99965	NEUTRAL
XLOC_002629	MXRA8	1	1352688	1361777	246.128	217.928	-0.175559	0.54935	0.99965	NEUTRAL
XLOC_002630	AURKAIP1	1	1373729	1375495	32.6024	29.4553	-0.146453	0.6202	0.99965	NEUTRAL
XLOC_002631	CCNL2	1	1385710	1399328	48.2025	53.2761	0.144381	0.68225	0.99965	NEUTRAL
XLOC_002632	MRPL20	1	1399521	1407313	49.6949	45.9497	-0.113044	0.73065	0.99965	NEUTRAL
XLOC_002635	TMEM240	1	1535173	1540453	1.27724	2.03794	0.674089	0.25425	0.99965	NEUTRAL
XLOC_002636	SSU72	1	1541672	1574869	30.2668	25.2994	-0.258634	0.38035	0.99965	NEUTRAL
XLOC_002639	C1orf233	1	1598011	1600096	2.2984	2.66828	0.215284	0.58075	0.99965	NEUTRAL
XLOC_002640	RP11-345P4.9	1	1613757	1630610	0.956439	0.83315	-0.199097	0.8401	0.99965	NEUTRAL
XLOC_002641	CDK11A,CDK11B,SLC35E2	1	1632094	1745992	15.8668	15.448	-0.0385869	0.9473	0.99965	NEUTRAL
XLOC_002642	SLC35E2B	1	1632094	1745992	12.4566	11.0955	-0.166936	0.61115	0.99965	NEUTRAL
XLOC_002643	NADK	1	1751231	1780457	16.1816	19.4808	0.267706	0.5318	0.99965	NEUTRAL
XLOC_002644	GNB1	1	1785284	1891117	164.136	166.169	0.0177598	0.95095	0.99965	NEUTRAL
XLOC_002650	C1orf86	1	2050469	2220738	32.1649	25.433	-0.338787	0.322	0.99965	NEUTRAL
XLOC_002652	MORN1	1	2321252	2391707	0.492989	0.85683	0.797454	0.3045	0.99965	NEUTRAL
XLOC_002656	PEX10	1	2391774	2413797	9.588	8.6354	-0.150967	0.785	0.99965	NEUTRAL
XLOC_002659	PANK4	1	2508532	2526600	9.35508	11.3234	0.275479	0.37475	0.99965	NEUTRAL
XLOC_002662	MMEL1	1	2586490	2801721	3.95921	4.04244	0.0300156	0.9728	0.99965	NEUTRAL
XLOC_002666	LINC00982	1	3059614	3068437	0.885521	0.46736	-0.921992	0.2609	0.99965	NEUTRAL
XLOC_002669	MEGF6	1	3489919	3611495	18.0581	21.5004	0.251718	0.53295	0.99965	NEUTRAL
XLOC_002672	WRAP73	1	3630766	3747336	7.36098	5.39804	-0.447463	0.39645	0.99965	NEUTRAL
XLOC_002675	TP73-AS1	1	3630766	3747336	8.86397	8.12934	-0.124814	0.7922	0.99965	NEUTRAL
XLOC_002676	LRRC47	1	3778557	3796504	13.8297	12.2707	-0.172547	0.7257	0.99965	NEUTRAL
XLOC_002677	CEP104	1	3812080	3857214	10.0792	11.5735	0.199439	0.6627	0.99965	NEUTRAL
XLOC_002678	C1orf174	1	3889124	3900293	6.96149	6.59967	-0.0770027	0.80875	0.99965	NEUTRAL
XLOC_002687	NPHP4	1	5862810	6101193	2.51534	3.14245	0.321137	0.4868	0.99965	NEUTRAL
XLOC_002690	RPL22	1	6181268	6235972	303.224	374.43	0.304314	0.47305	0.99965	NEUTRAL
XLOC_002691	RP1-120G22.11	1	6181268	6235972	0.412675	0.306753	-0.427929	0.777	0.99965	NEUTRAL
XLOC_002692	ICMT	1	6181268	6235972	38.3744	32.5338	-0.238205	0.6509	0.99965	NEUTRAL
XLOC_002693	GPR153	1	6247345	6260975	1.19324	1.44142	0.272611	0.47625	0.99965	NEUTRAL
XLOC_002694	ACOT7	1	6264268	6394391	30.2391	29.9045	-0.0160523	0.95505	0.99965	NEUTRAL
XLOC_002698	PLEKHG5,TNFRSF25	1	6424787	6520061	12.6934	14.2613	0.168028	0.583	0.99965	NEUTRAL
XLOC_002699	NOL9	1	6521346	6554535	2.94441	2.03834	-0.530588	0.2592	0.99965	NEUTRAL
XLOC_002700	KLHL21	1	6590723	6624033	24.2158	15.9039	-0.606573	0.06335	0.99965	NEUTRAL
XLOC_002701	DNAJC11	1	6624865	6701924	6.94041	8.3095	0.259742	0.58475	0.99965	NEUTRAL
XLOC_002711	UTS2	1	7784319	7853512	1.37345	1.52692	0.152815	0.8426	0.99965	NEUTRAL
XLOC_002714	ERRFI1	1	8004403	8026308	98.3584	97.0448	-0.0193966	0.94155	0.99965	NEUTRAL
XLOC_002719	RERE	1	8352396	8817643	32.6459	27.4179	-0.251782	0.5665	0.99965	NEUTRAL
XLOC_002725	ENO1	1	8861001	8879894	910.351	869.834	-0.0656818	0.82755	0.99965	NEUTRAL
XLOC_002732	SLC2A5	1	9035106	9088478	2.33282	3.77734	0.695295	0.18895	0.99965	NEUTRAL
XLOC_002733	GPR157	1	9100304	9129170	1.58322	1.62021	0.033315	0.94355	0.99965	NEUTRAL
XLOC_002735	RP3-510D11.1	1	9182006	9202619	0.614936	0.694843	0.176252	0.8893	0.99965	NEUTRAL
XLOC_002741	CLSTN1	1	9651731	9824526	68.9154	65.5139	-0.0730254	0.7941	0.99965	NEUTRAL
XLOC_002743	CTNNBIP1	1	9848275	9910336	10.5496	11.1062	0.074171	0.88025	0.99965	NEUTRAL
XLOC_002744	LZIC	1	9922112	9985501	10.3918	10.0589	-0.0469797	0.91315	0.99965	NEUTRAL
XLOC_002747	DFFA	1	10456521	10630758	9.99684	10.0695	0.0104484	0.97985	0.99965	NEUTRAL
XLOC_002753	MASP2	1	11012343	11047233	0.595584	0.462869	-0.363701	0.86925	0.99965	NEUTRAL
XLOC_002754	SRM	1	11054583	11060024	60.0858	55.4833	-0.114969	0.677	0.99965	NEUTRAL
XLOC_002755	EXOSC10	1	11066617	11102100	12.2106	14.6142	0.259242	0.4638	0.99965	NEUTRAL
XLOC_002756	MTOR	1	11106534	11262507	6.83374	6.36637	-0.102205	0.78475	0.99965	NEUTRAL
XLOC_002759	FBXO2	1	11648366	11663327	0.49545	0.493217	-0.00651792	0.9953	0.99965	NEUTRAL
XLOC_002760	MAD2L2	1	11674479	11691650	18.7257	17.6986	-0.0813837	0.78375	0.99965	NEUTRAL
XLOC_002762	MTHFR	1	11761786	11848345	3.64674	3.66294	0.00639421	0.99145	0.99965	NEUTRAL
XLOC_002766	KIAA2013	1	11919590	11926428	22.2355	20.6279	-0.108272	0.68885	0.99965	NEUTRAL
XLOC_002775	DHRS3	1	12567909	12617731	69.3588	86.5697	0.319784	0.2451	0.99965	NEUTRAL
XLOC_002778	RP11-474O21.5	1	12618899	12619244	2.67917	3.0586	0.191086	0.80205	0.99965	NEUTRAL
XLOC_002813	CASP9	1	15456727	15526534	3.26472	3.49795	0.0995488	0.77495	0.99965	NEUTRAL
XLOC_002820	RP11-288I21.1	1	15684331	15749896	0.856214	1.1116	0.376599	0.88205	0.99965	NEUTRAL
XLOC_002823	FLJ37453	1	15834478	15940460	0.398377	0.471807	0.24406	0.53915	0.99965	NEUTRAL
XLOC_002825	ZBTB17	1	15941868	15976132	7.94391	9.64005	0.279191	0.4998	0.99965	NEUTRAL
XLOC_002828	HSPB7	1	16014027	16034050	48.095	31.4612	-0.612315	0.05755	0.99965	NEUTRAL
XLOC_002831	EPHA2	1	16124336	16157329	39.7634	43.0655	0.115091	0.67755	0.99965	NEUTRAL
XLOC_002832	ARHGEF19	1	16197853	16212609	3.38092	2.69583	-0.326688	0.39595	0.99965	NEUTRAL
XLOC_002834	RSG1	1	16231699	16237162	3.51707	3.43915	-0.0323217	0.96135	0.99965	NEUTRAL
XLOC_002836	FBXO42	1	16246838	16352454	6.92157	7.24453	0.0657917	0.8795	0.99965	NEUTRAL
XLOC_002838	SPATA21	1	16352574	16437424	7.58821	7.02866	-0.11051	0.8609	0.99965	NEUTRAL
XLOC_002839	CROCCP3	1	16460947	16499257	0.799399	0.897585	0.167133	0.837	0.99965	NEUTRAL
XLOC_002843	NBPF1	1	16562318	16613562	12.5827	12.7822	0.0226973	0.95895	0.99965	NEUTRAL
XLOC_002844	CROCCP2	1	16618261	16644683	4.83616	5.46297	0.175823	0.56415	0.99965	NEUTRAL
XLOC_002849	MST1L	1	16740272	16972979	0.627885	0.878286	0.48419	0.66295	0.99965	NEUTRAL
XLOC_002852	RP11-108M9.4	1	16740272	16972979	0.911838	1.44752	0.666733	0.75975	0.99965	NEUTRAL
XLOC_002854	MFAP2	1	16974501	17011928	56.8911	74.3438	0.386009	0.3146	0.99965	NEUTRAL
XLOC_002855	ATP13A2	1	16974501	17011928	14.808	20.6441	0.479352	0.28255	0.99965	NEUTRAL
XLOC_002856	SDHB	1	17018721	17054170	54.5035	56.7047	0.0571195	0.84515	0.99965	NEUTRAL
XLOC_002857	PADI2	1	17066760	17119435	1.85307	1.7921	-0.0482653	0.9115	0.99965	NEUTRAL
XLOC_002859	RCC2	1	17406759	17439724	23.9049	24.0484	0.0086296	0.97505	0.99965	NEUTRAL
XLOC_002861	ALDH4A1,IFFO2,RP13-279N23.2,TAS1R2	1	18839598	18956686	13.7699	17.9111	0.379335	0.2827	0.99965	NEUTRAL
XLOC_002864	UBR4	1	19072109	19210276	33.2934	30.6093	-0.121268	0.7261	0.99965	NEUTRAL
XLOC_002865	EMC1	1	19210500	19260128	43.9095	48.7103	0.149692	0.65825	0.99965	NEUTRAL
XLOC_002868	AKR7A2	1	19303964	19312146	16.4835	15.4587	-0.0926068	0.75595	0.99965	NEUTRAL
XLOC_002870	CAPZB	1	19338775	19485539	202.31	194.669	-0.0555451	0.84955	0.99965	NEUTRAL
XLOC_002872	TMCO4	1	19682212	19799945	3.07299	2.80548	-0.131394	0.71305	0.99965	NEUTRAL
XLOC_002882	CAMK2N1	1	20482390	20486220	15.9602	8.69392	-0.876404	0.0027	0.7393	NEUTRAL
XLOC_002883	MUL1	1	20499447	20508161	13.839	10.9942	-0.331999	0.2456	0.99965	NEUTRAL
XLOC_002884	DDOST	1	20633454	20661544	170.72	174.791	0.0340021	0.90995	0.99965	NEUTRAL
XLOC_002888	HP1BP3	1	20742660	20787323	49.8127	44.8266	-0.152158	0.6725	0.99965	NEUTRAL
XLOC_002889	EIF4G3	1	20806291	21176888	16.9491	17.5738	0.052218	0.8429	0.99965	NEUTRAL
XLOC_002893	ECE1	1	21217246	21345504	29.4339	29.1186	-0.015539	0.9517	0.99965	NEUTRAL
XLOC_002899	USP48	1	21678297	21783606	11.383	11.1691	-0.0273732	0.92155	0.99965	NEUTRAL
XLOC_002900	HSPG2	1	21812264	21937297	95.3803	118.386	0.311731	0.364	0.99965	NEUTRAL
XLOC_002912	LUZP1	1	23019447	23177808	11.6626	11.1148	-0.0693964	0.8472	0.99965	NEUTRAL
XLOC_002915	LINC01355	1	23281308	23286752	0.543436	0.928376	0.7726	0.12715	0.99965	NEUTRAL
XLOC_002916	HNRNPR	1	23303770	23344336	19.3545	21.0686	0.12243	0.6909	0.99965	NEUTRAL
XLOC_002917	ZNF436	1	23359447	23371839	5.06017	4.7736	-0.0841067	0.7863	0.99965	NEUTRAL
XLOC_002919	TCEA3	1	23381060	23424740	9.33795	8.86929	-0.0742872	0.8177	0.99965	NEUTRAL
XLOC_002920	ASAP3	1	23428562	23484568	6.2365	6.29983	0.0145753	0.96955	0.99965	NEUTRAL
XLOC_002923	ID3	1	23557917	23559794	82.0327	83.4477	0.0246736	0.931	0.99965	NEUTRAL
XLOC_002925	TCEB3-AS1	1	23743154	23778287	6.25202	6.20188	-0.0116173	0.98745	0.99965	NEUTRAL
XLOC_002926	GALE	1	23795598	23800804	9.1043	9.13746	0.00524403	0.9869	0.99965	NEUTRAL
XLOC_002927	HMGCL	1	23801884	23838620	16.705	14.8864	-0.166281	0.55925	0.99965	NEUTRAL
XLOC_002928	FUCA1	1	23845076	23868294	23.3322	22.9828	-0.0217637	0.93655	0.99965	NEUTRAL
XLOC_002932	SRSF10	1	23964803	23980927	28.9644	28.0641	-0.0455541	0.8871	0.99965	NEUTRAL
XLOC_002939	STPG1	1	24307555	24472976	2.52236	1.89996	-0.408805	0.6449	0.99965	NEUTRAL
XLOC_002940	RP4-594I10.3	1	24502350	24556024	0.648716	0.370184	-0.809345	0.5034	0.99965	NEUTRAL
XLOC_002943	RUNX3	1	24899510	24965121	1.75223	1.71151	-0.0339227	0.9392	0.99965	NEUTRAL
XLOC_002948	SYF2	1	25222678	25232502	20.5794	19.2831	-0.0938639	0.74975	0.99965	NEUTRAL
XLOC_002949	RSRP1	1	25242236	25430192	20.0111	21.5853	0.10925	0.8484	0.99965	NEUTRAL
XLOC_002954	RP1-317E23.3	1	25800175	25859458	3.24616	2.45045	-0.405692	0.85595	0.99965	NEUTRAL
XLOC_002955	AUNIP	1	25800175	25859458	11.9745	14.0879	0.234483	0.9465	0.99965	NEUTRAL
XLOC_002956	PAQR7	1	25859612	25871253	9.97256	9.21428	-0.114092	0.68225	0.99965	NEUTRAL
XLOC_002957	STMN1	1	25884180	25906991	37.3267	25.2365	-0.564692	0.05965	0.99965	NEUTRAL
XLOC_002958	PAFAH2	1	25959766	25998157	3.88221	3.26787	-0.248527	0.6082	0.99965	NEUTRAL
XLOC_002961	RP11-96L14.7	1	26169870	26172060	8.5334	8.57828	0.00756703	0.98875	0.99965	NEUTRAL
XLOC_002964	UBXN11	1	26279175	26320523	12.8387	10.3954	-0.304563	0.7514	0.99965	NEUTRAL
XLOC_002976	GPN2	1	26876132	26890297	9.57569	8.11921	-0.238038	0.68815	0.99965	NEUTRAL
XLOC_002977	GPATCH3	1	26890487	26946862	3.23561	2.68605	-0.268551	0.7238	0.99965	NEUTRAL
XLOC_002981	FAM46B	1	27005019	27012836	0.713946	0.631826	-0.176288	0.7368	0.99965	NEUTRAL
XLOC_002983	SLC9A1	1	27098814	27166981	13.0145	11.1541	-0.222544	0.41905	0.99965	NEUTRAL
XLOC_002987	MAP3K6	1	27355183	27366892	7.48688	8.83511	0.238882	0.47365	0.99965	NEUTRAL
XLOC_002990	WASF2	1	27404225	27490158	28.5876	24.5063	-0.222236	0.40255	0.99965	NEUTRAL
XLOC_002991	AHDC1	1	27534034	27604431	3.34547	3.6312	0.118235	0.6932	0.99965	NEUTRAL
XLOC_002994	IFI6	1	27666060	27703063	10.699	8.07487	-0.405967	0.249	0.99965	NEUTRAL
XLOC_002998	RPA2	1	27891523	27914746	11.0491	10.7133	-0.044518	0.8849	0.99965	NEUTRAL
XLOC_003000	EYA3	1	27970343	28088696	3.82436	3.39785	-0.170597	0.5512	0.99965	NEUTRAL
XLOC_003008	DNAJC8	1	28199455	28233025	39.1625	37.7334	-0.053631	0.8426	0.99965	NEUTRAL
XLOC_003012	SNHG12,SNORA16A,SNORA44,SNORA61	1	28553084	28582983	13.27	14.9968	0.176481	0.8632	0.99965	NEUTRAL
XLOC_003014	TAF12	1	28589322	28643085	10.5605	10.4749	-0.0117498	0.9697	0.99965	NEUTRAL
XLOC_003018	TMEM200B	1	28887090	29123935	5.54062	4.50811	-0.297524	0.46565	0.99965	NEUTRAL
XLOC_003020	SRSF4	1	29147742	29181987	32.7428	36.2268	0.145882	0.69715	0.99965	NEUTRAL
XLOC_003022	MECR	1	29192872	29230942	10.9646	8.50099	-0.367153	0.3298	0.99965	NEUTRAL
XLOC_003032	LAPTM5	1	30732468	30757820	0.615663	0.676156	0.135215	0.79745	0.99965	NEUTRAL
XLOC_003036	SDC3	1	30869466	30908761	29.6955	25.2622	-0.233264	0.38035	0.99965	NEUTRAL
XLOC_003038	PUM1	1	30931505	31065991	19.1511	19.8149	0.0491618	0.86895	0.99965	NEUTRAL
XLOC_003042	SNRNP40	1	31259567	31296782	11.8107	12.7356	0.108769	0.72625	0.99965	NEUTRAL
XLOC_003046	AC114494.1	1	31409564	31434680	1.96818	2.00216	0.0246937	0.4467	0.99965	NEUTRAL
XLOC_003051	PEF1	1	31617685	31704319	40.9968	42.4417	0.0499711	0.9213	0.99965	NEUTRAL
XLOC_003052	COL16A1	1	31617685	31704319	49.671	59.9512	0.271385	0.6237	0.99965	NEUTRAL
XLOC_003053	ADGRB2	1	31727116	31764893	6.64357	5.4322	-0.29042	0.35475	0.99965	NEUTRAL
XLOC_003055	SPOCD1	1	31789129	31816051	31.6256	25.3468	-0.31929	0.24135	0.99965	NEUTRAL
XLOC_003058	PTP4A2	1	31842018	31944856	190.391	146.111	-0.381905	0.34215	0.99965	NEUTRAL
XLOC_003062	RP4-622L5.7	1	32200385	32208687	1.35471	1.24569	-0.121045	0.9109	0.99965	NEUTRAL
XLOC_003063	TMEM234	1	32209093	32231604	5.40397	5.08608	-0.0874635	0.94075	0.99965	NEUTRAL
XLOC_003064	MTMR9LP	1	32231657	32241620	0.620801	0.526949	-0.236469	0.6796	0.99965	NEUTRAL
XLOC_003067	MARCKSL1	1	32333831	32336379	16.3795	21.3833	0.38459	0.18315	0.99965	NEUTRAL
XLOC_003069	FAM229A	1	32351520	32364312	1.04819	0.935993	-0.163324	0.8287	0.99965	NEUTRAL
XLOC_003070	BSDC1	1	32365102	32394731	26.8516	23.1673	-0.212921	0.4236	0.99965	NEUTRAL
XLOC_003073	ZBTB8OS	1	32465056	32650903	9.32321	10.9634	0.233803	0.67055	0.99965	NEUTRAL
XLOC_003074	SYNC	1	32651141	32703596	43.2849	36.6838	-0.238719	0.515	0.99965	NEUTRAL
XLOC_003076	YARS	1	32775236	32858879	85.4377	75.8626	-0.171484	0.57385	0.99965	NEUTRAL
XLOC_003077	FNDC5	1	32862267	32872482	0.438748	0.581019	0.405192	0.6357	0.99965	NEUTRAL
XLOC_003078	TMEM54	1	32885993	32901438	18.0262	17.4041	-0.0506642	0.86905	0.99965	NEUTRAL
XLOC_003079	RNF19B	1	32936444	32964685	5.50878	5.33524	-0.046178	0.88165	0.99965	NEUTRAL
XLOC_003080	AK2	1	32986951	33080996	48.2987	55.7948	0.208147	0.58795	0.99965	NEUTRAL
XLOC_003083	TRIM62	1	33145401	33182059	2.58892	2.63487	0.0253846	0.9498	0.99965	NEUTRAL
XLOC_003085	PHC2	1	33306765	33431052	64.3644	53.0359	-0.279292	0.3875	0.99965	NEUTRAL
XLOC_003095	SMIM12	1	34712736	34859816	10.8981	11.3963	0.0644955	0.8656	0.99965	NEUTRAL
XLOC_003099	RP11-244H3.4,ZMYM6,ZMYM6NB	1	34974355	35031968	25.6817	22.4835	-0.191871	0.5791	0.99965	NEUTRAL
XLOC_003100	SFPQ	1	35176377	35193148	52.0503	53.7633	0.0467146	0.89115	0.99965	NEUTRAL
XLOC_003102	ZMYM4-AS1	1	35268966	35422058	2.23521	1.91033	-0.226591	0.48105	0.99965	NEUTRAL
XLOC_003103	KIAA0319L	1	35433489	35567274	14.9113	16.7357	0.16653	0.6636	0.99965	NEUTRAL
XLOC_003105	PSMB2	1	35599543	35641844	28.4138	27.223	-0.0617635	0.827	0.99965	NEUTRAL
XLOC_003106	C1orf216	1	35713874	35719472	11.013	12.6429	0.199122	0.4776	0.99965	NEUTRAL
XLOC_003112	COL8A2	1	36095235	36125220	13.6755	13.8161	0.014758	0.95635	0.99965	NEUTRAL
XLOC_003113	TRAPPC3	1	36136569	36180849	39.0507	37.684	-0.0513986	0.92815	0.99965	NEUTRAL
XLOC_003115	EVA1B	1	36306386	36329221	25.6996	22.056	-0.220571	0.60145	0.99965	NEUTRAL
XLOC_003116	STK40	1	36339623	36385896	5.78648	5.93058	0.0354875	0.91555	0.99965	NEUTRAL
XLOC_003117	LSM10	1	36391237	36397892	15.2667	15.0067	-0.0247838	0.93795	0.99965	NEUTRAL
XLOC_003119	OSCP1	1	36415826	36450451	3.13275	3.15516	0.010284	0.98095	0.99965	NEUTRAL
XLOC_003121	MRPS15	1	36455717	36464437	28.6969	27.5745	-0.0575588	0.84015	0.99965	NEUTRAL
XLOC_003129	MEAF6	1	37492574	37514774	25.3261	21.5106	-0.235577	0.4178	0.99965	NEUTRAL
XLOC_003131	SNIP1	1	37534448	37554302	2.94125	3.08072	0.0668387	0.8308	0.99965	NEUTRAL
XLOC_003132	GNL2	1	37556918	37595935	6.69513	6.45742	-0.0521541	0.88525	0.99965	NEUTRAL
XLOC_003134	C1orf109	1	37681569	37692249	11.606	11.1789	-0.0540955	0.88465	0.99965	NEUTRAL
XLOC_003139	YRDC	1	37802943	37809454	8.83909	7.98056	-0.147408	0.76735	0.99965	NEUTRAL
XLOC_003140	MTF1	1	37809566	37859620	3.31759	2.79158	-0.249053	0.39485	0.99965	NEUTRAL
XLOC_003141	INPP5B	1	37860696	37947057	5.01922	4.36824	-0.200412	0.5566	0.99965	NEUTRAL
XLOC_003142	SF3A3	1	37956974	37990921	19.4085	21.3341	0.136472	0.71345	0.99965	NEUTRAL
XLOC_003143	FHL3	1	37996769	38005606	13.2418	13.0182	-0.0245776	0.9338	0.99965	NEUTRAL
XLOC_003148	GJA9,MYCBP,RP5-864K19.6,RRAGC	1	38838197	38941799	24.8898	20.3303	-0.291926	0.31345	0.99965	NEUTRAL
XLOC_003149	RHBDL2	1	38838197	38941799	0.885883	1.3336	0.590141	0.83145	0.99965	NEUTRAL
XLOC_003156	PPIEL,RP11-69E11.4	1	39491645	39558707	3.0776	5.05667	0.716381	0.2023	0.99965	NEUTRAL
XLOC_003157	PABPC4	1	39560815	39576790	99.8781	100.224	0.00499322	0.9854	0.99965	NEUTRAL
XLOC_003166	TRIT1	1	39841021	39883511	8.06189	9.57981	0.248878	0.4855	0.99965	NEUTRAL
XLOC_003168	MYCL	1	39895425	39902256	0.454153	0.447346	-0.0217862	0.97255	0.99965	NEUTRAL
XLOC_003170	PPT1	1	40072704	40097703	20.8688	20.7102	-0.01101	0.96645	0.99965	NEUTRAL
XLOC_003171	RP1-39G22.7	1	40256426	40257967	1.11157	1.10742	-0.00539488	0.97065	0.99965	NEUTRAL
XLOC_003176	RP11-656D10.5	1	40508740	40517174	0.984775	0.863432	-0.189712	0.8996	0.99965	NEUTRAL
XLOC_003177	RP11-656D10.6	1	40508740	40517174	0.689431	0.349323	-0.980846	0.58665	0.99965	NEUTRAL
XLOC_003182	CITED4	1	40861050	40862366	2.20242	1.52782	-0.527611	0.26265	0.99965	NEUTRAL
XLOC_003187	SCMH1	1	41014589	41242154	10.0165	10.3988	0.0540305	0.86355	0.99965	NEUTRAL
XLOC_003192	HIVEP3	1	41506364	42035925	3.97016	4.1362	0.0591095	0.8894	0.99965	NEUTRAL
XLOC_003194	FOXJ3	1	42176538	42338376	10.3358	9.67827	-0.094828	0.7245	0.99965	NEUTRAL
XLOC_003200	P3H1	1	42746334	42767084	51.902	59.7225	0.202485	0.46145	0.99965	NEUTRAL
XLOC_003202	CCDC23	1	42807051	42846422	4.79256	5.31305	0.148743	0.81795	0.99965	NEUTRAL
XLOC_003203	RP11-342M1.3	1	42807051	42846422	0.747823	1.10142	0.558594	0.76875	0.99965	NEUTRAL
XLOC_003206	SLC2A1	1	42925374	42983358	150.257	189.413	0.334103	0.29645	0.99965	NEUTRAL
XLOC_003207	EBNA1BP2	1	43164174	43274002	26.0682	26.1068	0.00213419	0.9932	0.99965	NEUTRAL
XLOC_003210	ELOVL1	1	43363396	43368074	70.4417	65.1194	-0.113342	0.679	0.99965	NEUTRAL
XLOC_003211	MED8	1	43383916	43389808	20.4421	20.2217	-0.0156405	0.9569	0.99965	NEUTRAL
XLOC_003212	SZT2-AS1	1	43389881	43456995	0.901174	0.878386	-0.0369509	0.68795	0.99965	NEUTRAL
XLOC_003213	HYI	1	43389881	43456995	30.0551	30.3408	0.0136492	0.97465	0.99965	NEUTRAL
XLOC_003214	KDM4A-AS1	1	43650157	43931165	6.44132	7.37332	0.194957	0.8785	0.99965	NEUTRAL
XLOC_003218	SLC6A9	1	43991358	44115913	5.60402	5.46428	-0.0364294	0.9154	0.99965	NEUTRAL
XLOC_003229	ERI3	1	44221069	44355260	21.3796	18.7654	-0.188157	0.4944	0.99965	NEUTRAL
XLOC_003232	TMEM53	1	44405193	44674555	2.87974	2.78131	-0.0501715	0.9573	0.99965	NEUTRAL
XLOC_003241	EIF2B3	1	44850521	44986722	8.35948	7.29934	-0.195647	0.5378	0.99965	NEUTRAL
XLOC_003244	HECTD3	1	45002539	45011329	10.5179	11.9618	0.185587	0.57505	0.99965	NEUTRAL
XLOC_003248	MUTYH	1	45329162	45491166	4.07947	4.10724	0.00978481	0.9851	0.99965	NEUTRAL
XLOC_003249	TESK2	1	45329162	45491166	0.44885	0.433464	-0.0503208	0.95495	0.99965	NEUTRAL
XLOC_003250	CCDC163P	1	45493865	45523047	0.684354	0.490729	-0.479818	0.79905	0.99965	NEUTRAL
XLOC_003251	PRDX1	1	45493865	45523047	209.863	178.537	-0.23323	0.39195	0.99965	NEUTRAL
XLOC_003257	GPBP1L1	1	45627303	45750650	21.985	25.2535	0.199963	0.61465	0.99965	NEUTRAL
XLOC_003260	IPP	1	45627303	45750650	9.83971	8.49041	-0.212781	0.7704	0.99965	NEUTRAL
XLOC_003262	PIK3R3,RP11-322N21.2,RP4-533D7.6	1	46040139	46185958	0.945937	1.08239	0.194408	0.6314	0.99965	NEUTRAL
XLOC_003264	POMGNT1	1	46188681	46221261	30.4036	30.5367	0.00630158	0.98335	0.99965	NEUTRAL
XLOC_003265	LRRC41	1	46247687	46303608	34.9648	30.4732	-0.198365	0.4771	0.99965	NEUTRAL
XLOC_003269	MKNK1,MOB3C	1	46538695	46616891	8.99173	9.46068	0.0733458	0.83225	0.99965	NEUTRAL
XLOC_003270	ATPAF1	1	46632736	46673867	15.2016	15.6754	0.0442786	0.88485	0.99965	NEUTRAL
XLOC_003271	EFCAB14	1	46674035	46719064	16.1079	13.4827	-0.256652	0.4994	0.99965	NEUTRAL
XLOC_003283	STIL	1	47250138	47314147	0.898736	0.510684	-0.815466	0.1509	0.99965	NEUTRAL
XLOC_003285	FOXD2-AS1	1	47432132	47434641	0.540513	0.593971	0.136062	0.79975	0.99965	NEUTRAL
XLOC_003294	SPATA6	1	48295371	48472208	0.984471	1.5174	0.624182	0.39025	0.99965	NEUTRAL
XLOC_003306	FAF1	1	50437027	50960263	21.0154	21.539	0.0355007	0.9188	0.99965	NEUTRAL
XLOC_003312	TTC39A	1	51287257	51345116	0.513025	0.573785	0.161481	0.756	0.99965	NEUTRAL
XLOC_003313	EPS15	1	51354262	51561629	8.83558	8.70189	-0.0219961	0.93985	0.99965	NEUTRAL
XLOC_003318	NRD1	1	51561865	51878937	48.5783	48.5885	0.000303213	0.99885	0.99965	NEUTRAL
XLOC_003320	RAB3B	1	51907955	51990764	17.1093	11.6751	-0.551351	0.0381	0.99965	NEUTRAL
XLOC_003321	KTI12,TXNDC12	1	52020130	52090716	38.2954	33.7212	-0.183516	0.63085	0.99965	NEUTRAL
XLOC_003326	CC2D1B	1	52142093	52366193	10.4644	11.5177	0.13836	0.773	0.99965	NEUTRAL
XLOC_003328	ZCCHC11	1	52404563	52553487	8.51008	7.18854	-0.243472	0.6389	0.99965	NEUTRAL
XLOC_003329	COA7	1	52684450	52698366	4.87946	4.82469	-0.0162853	0.96575	0.99965	NEUTRAL
XLOC_003333	ECHDC2	1	52895909	52927212	12.4442	14.9248	0.262243	0.568	0.99965	NEUTRAL
XLOC_003338	RP11-334A14.5	1	53062051	53085502	1.01539	0.547428	-0.891289	0.59425	0.99965	NEUTRAL
XLOC_003339	HIGD1AP11	1	53062051	53085502	0.3784	0.545614	0.52797	0.6124	0.99965	NEUTRAL
XLOC_003341	RP5-1024G6.2	1	53196428	53220617	5.06921	4.65532	-0.122879	0.907	0.99965	NEUTRAL
XLOC_003342	C1orf123	1	53196428	53220617	14.5087	12.195	-0.250627	0.5465	0.99965	NEUTRAL
XLOC_003343	MAGOH	1	53226891	53328070	21.806	22.5398	0.0477498	0.9086	0.99965	NEUTRAL
XLOC_003344	LRP8	1	53226891	53328070	3.63809	3.82812	0.0734523	0.91195	0.99965	NEUTRAL
XLOC_003349	GLIS1	1	53506236	53738106	0.693173	0.77145	0.154356	0.75625	0.99965	NEUTRAL
XLOC_003351	NDC1	1	53765459	53838860	3.26758	2.49281	-0.390449	0.25635	0.99965	NEUTRAL
XLOC_003353	YIPF1	1	53851718	53889834	10.2421	9.17765	-0.158315	0.6032	0.99965	NEUTRAL
XLOC_003354	HSPB11	1	53916573	53945929	9.19324	10.3555	0.171749	0.62495	0.99965	NEUTRAL
XLOC_003357	TMEM59	1	54026680	54053504	254.907	264.479	0.0531796	0.8696	0.99965	NEUTRAL
XLOC_003360	CDCP2,CYB5RL,RP11-446E24.4	1	54133073	54413479	1.15175	1.09817	-0.0687268	0.95375	0.99965	NEUTRAL
XLOC_003361	SSBP3	1	54133073	54413479	11.7014	13.4736	0.203458	0.67215	0.99965	NEUTRAL
XLOC_003366	PARS2	1	54756897	54764514	1.62184	1.61804	-0.00339049	0.9856	0.99965	NEUTRAL
XLOC_003368	DHCR24	1	54849632	54888850	24.7922	23.4971	-0.077402	0.77395	0.99965	NEUTRAL
XLOC_003370	USP24	1	55066358	55215113	7.95417	8.2849	0.0587732	0.8401	0.99965	NEUTRAL
XLOC_003379	PPAP2B	1	56494746	56645301	31.9029	24.3318	-0.390845	0.14255	0.99965	NEUTRAL
XLOC_003385	DAB1,OMA1	1	56929209	58546802	1.93942	2.83369	0.54706	0.26795	0.99965	NEUTRAL
XLOC_003394	MYSM1	1	58654738	58700092	6.00953	7.43395	0.306875	0.4756	0.99965	NEUTRAL
XLOC_003396	JUN	1	58780787	58784327	37.8198	27.552	-0.456987	0.09625	0.99965	NEUTRAL
XLOC_003399	RP4-794H19.1	1	58785159	58899594	1.26691	0.757331	-0.742317	0.5379	0.99965	NEUTRAL
XLOC_003412	TM2D1	1	61681045	61725423	29.9163	28.0298	-0.0939724	0.77205	0.99965	NEUTRAL
XLOC_003417	DOCK7	1	62454727	62688368	13.8798	14.6249	0.0754433	0.77845	0.99965	NEUTRAL
XLOC_003427	ITGB3BP	1	63440769	63660245	6.28566	5.20552	-0.272024	0.8195	0.99965	NEUTRAL
XLOC_003442	JAK1	1	64745094	64966504	35.0019	30.3564	-0.20543	0.4496	0.99965	NEUTRAL
XLOC_003458	RP4-598P13.1	1	66533382	66748299	0.441101	0.477124	0.113256	0.9313	0.99965	NEUTRAL
XLOC_003461	WDR78	1	66812884	66924887	0.856015	0.921435	0.106246	0.88275	0.99965	NEUTRAL
XLOC_003462	SLC35D1	1	66999331	67054099	6.85355	5.82385	-0.234878	0.3987	0.99965	NEUTRAL
XLOC_003468	SERBP1	1	67407809	67430415	76.922	84.0722	0.128234	0.67155	0.99965	NEUTRAL
XLOC_003471	GNG12	1	67701465	68233120	127.796	98.0991	-0.381529	0.2254	0.99965	NEUTRAL
XLOC_003473	DIRAS3	1	67701465	68233120	1.40273	1.2264	-0.193806	0.93005	0.99965	NEUTRAL
XLOC_003475	WLS	1	67701465	68233120	63.3419	64.1361	0.0179758	0.98185	0.99965	NEUTRAL
XLOC_003487	LRRC40	1	69568397	70205620	4.72368	3.93622	-0.263099	0.4024	0.99965	NEUTRAL
XLOC_003490	ANKRD13C	1	70260587	70354734	8.06865	6.36722	-0.341664	0.25435	0.99965	NEUTRAL
XLOC_003497	ZRANB2	1	71048854	71081297	22.4108	24.5898	0.133868	0.637	0.99965	NEUTRAL
XLOC_003501	NEGR1	1	71081323	72282734	31.2251	26.4288	-0.240598	0.5406	0.99965	NEUTRAL
XLOC_003513	CRYZ	1	74705481	74766678	25.4052	21.972	-0.209463	0.5671	0.99965	NEUTRAL
XLOC_003525	PIGK	1	77088989	77219430	32.3617	27.2958	-0.245607	0.51315	0.99965	NEUTRAL
XLOC_003529	ZZZ3	1	77562415	77683419	19.1686	16.4231	-0.223018	0.42415	0.99965	NEUTRAL
XLOC_003530	USP33	1	77695986	77759852	14.8258	15.1864	0.0346671	0.91315	0.99965	NEUTRAL
XLOC_003534	FUBP1	1	77944054	77979110	26.0189	29.595	0.185795	0.5549	0.99965	NEUTRAL
XLOC_003542	ADGRL4	1	78889763	79006718	25.159	16.0122	-0.651904	0.04615	0.99965	NEUTRAL
XLOC_003558	TTLL7	1	83865027	83999150	2.57686	2.30083	-0.163465	0.8482	0.99965	NEUTRAL
XLOC_003561	RP11-486G15.2	1	84076330	84077931	0.334745	0.566109	0.758016	0.28765	0.99965	NEUTRAL
XLOC_003563	GNG5	1	84498324	84574480	66.7902	53.7548	-0.313243	0.46815	0.99965	NEUTRAL
XLOC_003564	CTBS	1	84498324	84574480	33.7329	28.9129	-0.222445	0.5331	0.99965	NEUTRAL
XLOC_003567	SSX2IP	1	84643706	84690803	3.51221	3.95215	0.170261	0.6308	0.99965	NEUTRAL
XLOC_003570	MCOLN2	1	84925582	84997113	0.616668	0.404997	-0.606582	0.4277	0.99965	NEUTRAL
XLOC_003573	SYDE2	1	85156872	85201046	0.748749	0.802126	0.0993485	0.8234	0.99965	NEUTRAL
XLOC_003574	C1orf52	1	85249952	85259672	15.6548	16.9124	0.111484	0.76235	0.99965	NEUTRAL
XLOC_003575	BCL10	1	85266247	85578363	11.9584	8.02079	-0.576213	0.528	0.99965	NEUTRAL
XLOC_003576	DDAH1	1	85266247	85578363	64.9071	57.5199	-0.174316	0.53855	0.99965	NEUTRAL
XLOC_003579	ZNHIT6	1	85649422	85708433	7.50968	6.64003	-0.177562	0.5408	0.99965	NEUTRAL
XLOC_003582	ODF2L	1	86346823	86396342	10.219	7.47107	-0.451862	0.30085	0.99965	NEUTRAL
XLOC_003588	RP4-612B15.3	1	86703501	86704462	0.384494	0.296322	-0.375799	0.7017	0.99965	NEUTRAL
XLOC_003589	SEP15	1	86862444	86914424	142.617	117.658	-0.277544	0.3084	0.99965	NEUTRAL
XLOC_003600	GTF2B	1	88852931	88891944	13.1945	10.303	-0.356871	0.2404	0.99965	NEUTRAL
XLOC_003601	CCBL2,RBMXL1	1	88935772	88992960	19.0085	16.0672	-0.242533	0.416	0.99965	NEUTRAL
XLOC_003602	GBP3	1	89006665	89022894	5.73825	5.87986	0.0351716	0.928	0.99965	NEUTRAL
XLOC_003603	GBP1	1	89052318	89065360	7.41896	11.3666	0.615514	0.084	0.99965	NEUTRAL
XLOC_003605	GBP2,GBP7	1	89106131	89176040	2.5328	1.855	-0.449314	0.2453	0.99965	NEUTRAL
XLOC_003620	ZNF644	1	90915297	91022272	7.99029	9.51653	0.252187	0.5481	0.99965	NEUTRAL
XLOC_003623	TGFBR3	1	91680342	91906335	4.63884	4.68427	0.014061	0.96455	0.99965	NEUTRAL
XLOC_003628	GLMN	1	92246401	92402056	1.83312	2.06272	0.170247	0.8383	0.99965	NEUTRAL
XLOC_003631	EVI5	1	92508695	92792404	6.68558	6.86001	0.0371587	0.934	0.99965	NEUTRAL
XLOC_003636	FAM69A	1	92832024	92961522	11.1082	9.10264	-0.287272	0.8654	0.99965	NEUTRAL
XLOC_003640	TMED5	1	93149741	93369498	31.2144	22.4497	-0.475517	0.2918	0.99965	NEUTRAL
XLOC_003643	RP4-717I23.3	1	93149741	93369498	6.5154	7.86269	0.27117	0.72955	0.99965	NEUTRAL
XLOC_003647	BCAR3	1	93561785	93847150	24.0958	20.8789	-0.206736	0.44875	0.99965	NEUTRAL
XLOC_003649	DNTTIP2	1	93866282	93879918	14.5254	14.2482	-0.0277936	0.92965	0.99965	NEUTRAL
XLOC_003650	GCLM	1	93885204	93909456	20.8084	15.3779	-0.43631	0.3114	0.99965	NEUTRAL
XLOC_003660	ARHGAP29	1	94148987	94275068	20.6922	12.5128	-0.725676	0.0093	0.99965	NEUTRAL
XLOC_003670	CNN3	1	94896948	94927278	219.52	224.879	0.0347946	0.9044	0.99965	NEUTRAL
XLOC_003671	ALG14	1	94974406	95072945	5.67673	5.08238	-0.159555	0.77955	0.99965	NEUTRAL
XLOC_003683	DPYD	1	97077742	97921049	8.72787	7.33923	-0.25	0.41375	0.99965	NEUTRAL
XLOC_003685	RP11-272L13.3	1	97933473	97941746	0.744327	0.524962	-0.503722	0.5228	0.99965	NEUTRAL
XLOC_003687	MIR137,MIR137HG	1	97987999	98049863	1.708	1.7571	0.0408905	0.9343	0.99965	NEUTRAL
XLOC_003691	FRRS1	1	99708702	99766631	0.531058	0.582216	0.132686	0.8877	0.99965	NEUTRAL
XLOC_003693	RP5-884G6.2	1	99968382	100026979	0.446492	0.341368	-0.387305	0.62465	0.99965	NEUTRAL
XLOC_003695	SASS6	1	100038096	100132955	0.583574	0.521781	-0.161471	0.90475	0.99965	NEUTRAL
XLOC_003696	LRRC39	1	100133149	100178273	0.958776	0.92313	-0.0546602	0.94985	0.99965	NEUTRAL
XLOC_003697	DBT	1	100186918	100249834	2.77937	3.39748	0.289707	0.49825	0.99965	NEUTRAL
XLOC_003705	EXTL2	1	100872371	100895998	12.7959	10.4541	-0.291611	0.33775	0.99965	NEUTRAL
XLOC_003707	DPH5	1	100989622	101087268	14.0236	16.6553	0.248129	0.4984	0.99965	NEUTRAL
XLOC_003715	COL11A1	1	102876466	103108496	13.559	17.0247	0.328377	0.4436	0.99965	NEUTRAL
XLOC_003730	SLC25A24	1	108134035	108202743	11.2182	7.87503	-0.510484	0.0843	0.99965	NEUTRAL
XLOC_003734	HENMT1	1	108648289	108661526	0.70132	0.679013	-0.0466339	0.93465	0.99965	NEUTRAL
XLOC_003737	AKNAD1,CLCC1,RP11-475E11.9	1	108815897	108963484	15.8209	16.2722	0.0405824	0.9023	0.99965	NEUTRAL
XLOC_003738	WDR47	1	108970213	109042113	5.0991	4.26779	-0.256755	0.38595	0.99965	NEUTRAL
XLOC_003740	TAF13	1	109062485	109076002	49.5964	40.4579	-0.293816	0.2885	0.99965	NEUTRAL
XLOC_003744	PSRC1	1	109279555	109283186	2.46679	2.67735	0.118169	0.79175	0.99965	NEUTRAL
XLOC_003746	SORT1	1	109309567	109397951	27.2873	27.2891	9.66601e-05	0.99955	0.99965	NEUTRAL
XLOC_003747	PSMA5	1	109399030	109426427	30.3122	30.8351	0.0246751	0.93005	0.99965	NEUTRAL
XLOC_003748	AMIGO1	1	109504174	109509738	1.67357	1.44476	-0.212102	0.5898	0.99965	NEUTRAL
XLOC_003752	RP5-1160K1.6	1	109548610	109632051	2.59318	1.79307	-0.532294	0.7058	0.99965	NEUTRAL
XLOC_003753	AC000032.2	1	109656080	109709551	4.03041	4.87931	0.275749	0.83755	0.99965	NEUTRAL
XLOC_003754	GSTM3	1	109712254	109775428	37.3577	37.3615	0.000149531	0.9993	0.99965	NEUTRAL
XLOC_003758	ALX3	1	110031576	110074641	1.52185	1.46111	-0.0587595	0.96905	0.99965	NEUTRAL
XLOC_003763	SLC16A4	1	110347115	110443817	6.3832	4.8855	-0.385774	0.532	0.99965	NEUTRAL
XLOC_003764	LAMTOR5	1	110347115	110443817	82.0852	82.6831	0.0104706	0.97415	0.99965	NEUTRAL
XLOC_003774	LRIF1	1	110943466	110964649	4.21055	3.79413	-0.150238	0.66865	0.99965	NEUTRAL
XLOC_003776	DRAM2	1	111117332	111185102	27.4473	25.7798	-0.090422	0.8316	0.99965	NEUTRAL
XLOC_003778	RP5-1180E21.5	1	111117332	111185102	9.98586	8.25636	-0.274381	0.79455	0.99965	NEUTRAL
XLOC_003779	DENND2D	1	111187173	111243440	1.12484	0.802132	-0.487812	0.50905	0.99965	NEUTRAL
XLOC_003783	OVGP1	1	111414313	111427777	1.90912	2.56911	0.428359	0.39215	0.99965	NEUTRAL
XLOC_003784	RP11-552M11.8	1	111431045	111433068	0.493839	0.803327	0.701947	0.2198	0.99965	NEUTRAL
XLOC_003785	WDR77	1	111438637	111462773	8.14571	11.3208	0.474866	0.50715	0.99965	NEUTRAL
XLOC_003788	LINC01160	1	111483347	111768016	0.312596	0.474228	0.601281	0.7481	0.99965	NEUTRAL
XLOC_003791	FAM212B	1	111483347	111768016	6.49549	5.96847	-0.122076	0.8008	0.99965	NEUTRAL
XLOC_003797	ST7L	1	112466540	112671619	9.00292	5.69904	-0.659675	0.374	0.99965	NEUTRAL
XLOC_003801	PPM1J,RHOC,RP11-426L16.10	1	112701105	112715477	274.773	263.657	-0.0595766	0.8397	0.99965	NEUTRAL
XLOC_003804	SLC16A1	1	112911846	112999496	19.3423	19.2268	-0.00864019	0.97605	0.99965	NEUTRAL
XLOC_003806	RLIMP2	1	113073208	113132260	1.56297	1.98644	0.345895	0.69145	0.99965	NEUTRAL
XLOC_003808	PHTF1	1	113696830	113759489	6.69713	6.30885	-0.0861653	0.83455	0.99965	NEUTRAL
XLOC_003809	RP4-730K3.3	1	113696830	113759489	1.12542	0.748178	-0.589013	0.73925	0.99965	NEUTRAL
XLOC_003810	RSBN1	1	113761831	113914086	4.22507	4.98223	0.237817	0.6386	0.99965	NEUTRAL
XLOC_003811	PTPN22	1	113761831	113914086	1.59037	1.5793	-0.0100811	0.99095	0.99965	NEUTRAL
XLOC_003813	AP4B1	1	113761831	113914086	4.99612	5.27827	0.0792552	0.89615	0.99965	NEUTRAL
XLOC_003819	TRIM33	1	114392776	114511160	7.03934	7.23603	0.0397587	0.8978	0.99965	NEUTRAL
XLOC_003820	BCAS2	1	114567556	114581639	19.7651	17.3719	-0.186198	0.5194	0.99965	NEUTRAL
XLOC_003821	DENND2C	1	114582847	114670422	0.662846	0.563628	-0.233931	0.61825	0.99965	NEUTRAL
XLOC_003824	CSDE1,NRAS	1	114704468	114758676	214.912	231.392	0.106595	0.7579	0.99965	NEUTRAL
XLOC_003825	SIKE1	1	114769478	114780685	14.1542	16.5584	0.226333	0.72105	0.99965	NEUTRAL
XLOC_003826	TSPAN2	1	115048010	115089500	2.71784	3.73953	0.4604	0.3845	0.99965	NEUTRAL
XLOC_003827	NGF	1	115283033	115368072	12.8377	15.0313	0.227587	0.46345	0.99965	NEUTRAL
XLOC_003834	ATP1A1-AS1	1	116372667	116418622	1.87659	2.26162	0.269239	0.88615	0.99965	NEUTRAL
XLOC_003839	CD58	1	116514534	116571039	5.96096	4.91703	-0.277758	0.47235	0.99965	NEUTRAL
XLOC_003850	TRIM45	1	117111059	117122587	0.912782	0.971316	0.0896703	0.84945	0.99965	NEUTRAL
XLOC_003859	GDAP2	1	117863484	117929630	5.124	5.82385	0.184703	0.65695	0.99965	NEUTRAL
XLOC_003863	TBX15	1	118883045	118989556	8.19714	6.96946	-0.234073	0.4119	0.99965	NEUTRAL
XLOC_003865	WARS2	1	119031215	119327303	4.24545	3.57564	-0.247717	0.57755	0.99965	NEUTRAL
XLOC_003878	ZNF697	1	119619421	119647773	3.70862	3.04273	-0.285516	0.35555	0.99965	NEUTRAL
XLOC_003883	RP5-1042I8.7	1	119909254	119910613	2.48908	1.8132	-0.45707	0.3141	0.99965	NEUTRAL
XLOC_003884	NOTCH2	1	119911552	120069626	89.1068	82.9083	-0.10402	0.71965	0.99965	NEUTRAL
XLOC_003885	SEC22B	1	120150897	120176515	26.2674	21.0229	-0.32131	0.26545	0.99965	NEUTRAL
XLOC_003888	PFN1P2	1	120432203	120434052	2.27772	3.1892	0.485605	0.2158	0.99965	NEUTRAL
XLOC_003889	CH17-472G23.4	1	120489624	120579190	1.91634	1.91659	0.000193479	0.9938	0.99965	NEUTRAL
XLOC_003920	HIST2H3PS2	1	143874792	143934776	0.736383	1.08548	0.559808	0.45645	0.99965	NEUTRAL
XLOC_003924	RP11-14N7.2	1	144227029	144250288	13.0076	10.9709	-0.245674	0.7142	0.99965	NEUTRAL
XLOC_003929	NBPF15	1	144421385	144461674	9.63811	10.3485	0.102595	0.8491	0.99965	NEUTRAL
XLOC_003933	U1	1	144560665	144560829	2.40186	1.581	-0.603318	0.3929	0.99965	NEUTRAL
XLOC_003937	SRGAP2B	1	144627191	145095528	4.22073	6.64461	0.654694	0.2966	0.99965	NEUTRAL
XLOC_003942	NBPF8	1	145289899	145405778	1.48971	1.38946	-0.1005	0.7894	0.99965	NEUTRAL
XLOC_003945	NBPF25P	1	145572344	145607858	0.322069	0.501463	0.638774	0.2213	0.99965	NEUTRAL
XLOC_003946	PDZK1	1	145670851	145708148	0.432635	0.655345	0.599106	0.38605	0.99965	NEUTRAL
XLOC_003947	RNF115	1	145719470	145824077	4.46361	4.52977	0.0212279	0.94865	0.99965	NEUTRAL
XLOC_003948	PIAS3	1	145845628	145859836	27.1848	23.8413	-0.189341	0.5247	0.99965	NEUTRAL
XLOC_003950	ANKRD35	1	145866559	145885866	0.95486	0.626658	-0.607611	0.1949	0.99965	NEUTRAL
XLOC_003951	ITGA10	1	145891207	145910189	5.03713	4.56592	-0.141698	0.70665	0.99965	NEUTRAL
XLOC_003952	PEX11B	1	145911349	145918837	9.62725	9.65417	0.00402873	0.98745	0.99965	NEUTRAL
XLOC_003953	RBM8A	1	145919012	145978848	36.898	37.5831	0.0265405	0.9587	0.99965	NEUTRAL
XLOC_003954	LIX1L	1	145919012	145978848	13.0242	10.6672	-0.28802	0.50205	0.99965	NEUTRAL
XLOC_003955	ANKRD34A	1	145919012	145978848	1.89184	1.24625	-0.602191	0.69575	0.99965	NEUTRAL
XLOC_003956	TXNIP	1	145992434	145996600	191.242	177.624	-0.106573	0.7183	0.99965	NEUTRAL
XLOC_003959	NBPF10,NOTCH2NL	1	146064698	146229026	14.1423	15.6652	0.14755	0.6995	0.99965	NEUTRAL
XLOC_003969	PRKAB2	1	147155105	147172550	12.0178	13.7496	0.194208	0.4657	0.99965	NEUTRAL
XLOC_003974	ACP6	1	147629651	147670496	1.84548	1.54316	-0.258104	0.65865	0.99965	NEUTRAL
XLOC_003979	NBPF11	1	148102045	148152322	1.77255	1.81813	0.0366278	0.9116	0.99965	NEUTRAL
XLOC_003992	NBPF14	1	148531384	148679751	6.96304	8.50699	0.288933	0.4317	0.99965	NEUTRAL
XLOC_003998	RP4-791M13.4	1	148808180	149048286	0.450146	0.256731	-0.810133	0.74605	0.99965	NEUTRAL
XLOC_003999	NBPF9	1	149054026	149103561	4.60803	5.07158	0.138285	0.6406	0.99965	NEUTRAL
XLOC_004002	WI2-1896O14.1	1	149176021	149321732	5.40862	3.46465	-0.64255	0.1269	0.99965	NEUTRAL
XLOC_004008	HIST2H2BF	1	149782670	149812373	1.19676	1.49768	0.323588	0.4838	0.99965	NEUTRAL
XLOC_004012	HIST2H2AA3,HIST2H2BE	1	149842187	149886652	3.02484	1.77293	-0.770726	0.1003	0.99965	NEUTRAL
XLOC_004013	RP11-196G18.22	1	149842187	149886652	0.530732	0.530354	-0.00102909	0.9831	0.99965	NEUTRAL
XLOC_004019	SV2A	1	149903317	149917882	7.32633	7.4165	0.0176474	0.95075	0.99965	NEUTRAL
XLOC_004020	SF3B4	1	149923316	149928344	19.5809	15.9557	-0.295378	0.31495	0.99965	NEUTRAL
XLOC_004021	MTMR11	1	149928650	149936898	8.04829	8.10971	0.0109681	0.9767	0.99965	NEUTRAL
XLOC_004022	OTUD7B	1	149937811	150010676	5.37501	5.63917	0.0692159	0.86515	0.99965	NEUTRAL
XLOC_004023	ANP32E	1	150218416	150236156	14.9497	14.8699	-0.00771356	0.9795	0.99965	NEUTRAL
XLOC_004025	APH1A	1	150265398	150280916	46.0069	45.7047	-0.00950722	0.97555	0.99965	NEUTRAL
XLOC_004028	MCL1	1	150548561	150579738	63.2666	53.0299	-0.254637	0.4009	0.99965	NEUTRAL
XLOC_004032	ENSA	1	150600850	150629612	24.2597	21.367	-0.183179	0.59005	0.99965	NEUTRAL
XLOC_004034	GOLPH3L	1	150646224	150697144	9.53849	9.70515	0.0249897	0.9448	0.99965	NEUTRAL
XLOC_004037	CTSK	1	150796207	150808323	9.81531	6.32239	-0.634565	0.04725	0.99965	NEUTRAL
XLOC_004038	ARNT	1	150809704	150876768	15.0409	14.8174	-0.0215946	0.93635	0.99965	NEUTRAL
XLOC_004041	CERS2	1	150926262	150975534	96.9133	91.0546	-0.0899626	0.7922	0.99965	NEUTRAL
XLOC_004042	FAM63A	1	150996085	151008375	3.62349	3.39961	-0.0920121	0.8135	0.99965	NEUTRAL
XLOC_004044	CDC42SE1	1	151047739	151070325	24.4044	22.3562	-0.126466	0.6855	0.99965	NEUTRAL
XLOC_004047	SEMA6C	1	151131684	151146664	0.779338	1.17868	0.59685	0.3605	0.99965	NEUTRAL
XLOC_004048	LYSMD1	1	151156628	151195321	3.61427	2.37162	-0.607831	0.38215	0.99965	NEUTRAL
XLOC_004049	TMOD4,VPS72	1	151156628	151195321	14.1805	13.234	-0.0996634	0.81315	0.99965	NEUTRAL
XLOC_004051	PI4KB	1	151280023	151327715	19.7726	17.3344	-0.189865	0.56795	0.99965	NEUTRAL
XLOC_004053	RFX5	1	151340639	151348027	3.97542	4.58659	0.206318	0.5108	0.99965	NEUTRAL
XLOC_004054	SELENBP1	1	151364301	151372733	2.65839	3.32031	0.320768	0.4129	0.99965	NEUTRAL
XLOC_004055	POGZ	1	151402723	151459465	8.42795	10.7283	0.348174	0.29435	0.99965	NEUTRAL
XLOC_004060	MRPL9	1	151755540	151794402	21.2877	17.5802	-0.276065	0.4976	0.99965	NEUTRAL
XLOC_004062	TDRKH	1	151755540	151794402	2.01781	1.33355	-0.597516	0.3628	0.99965	NEUTRAL
XLOC_004067	THEM4	1	151873583	151909808	5.63349	5.1798	-0.121134	0.70445	0.99965	NEUTRAL
XLOC_004069	S100A10	1	151982914	151994390	173.37	184.638	0.0908442	0.7543	0.99965	NEUTRAL
XLOC_004070	S100A11	1	151994530	152047907	583.149	569.69	-0.0336889	0.90375	0.99965	NEUTRAL
XLOC_004076	FLG	1	152122533	152445456	14.7524	22.3495	0.599289	0.0287	0.99965	NEUTRAL
XLOC_004104	S100A6	1	153533602	153536244	1611.98	1470.99	-0.132048	0.64095	0.99965	NEUTRAL
XLOC_004106	S100A4	1	153543612	153550136	43.516	36.2671	-0.262886	0.3774	0.99965	NEUTRAL
XLOC_004108	S100A2	1	153561107	153567890	5.40422	5.24686	-0.0426324	0.929	0.99965	NEUTRAL
XLOC_004109	S100A16	1	153606885	153613145	121.747	111.615	-0.12535	0.64855	0.99965	NEUTRAL
XLOC_004111	S100A13	1	153618786	153646306	118.263	94.5771	-0.322438	0.391	0.99965	NEUTRAL
XLOC_004112	ILF2	1	153658653	153671048	48.945	46.6586	-0.0690189	0.817	0.99965	NEUTRAL
XLOC_004117	AL513523.2	1	153728066	153780157	7.49211	8.47054	0.177081	0.7925	0.99965	NEUTRAL
XLOC_004119	GATAD2B	1	153804724	153922975	4.49128	4.5723	0.025795	0.92635	0.99965	NEUTRAL
XLOC_004121	DENND4B	1	153929500	153946696	15.768	23.9093	0.600571	0.2068	0.99965	NEUTRAL
XLOC_004122	CRTC2	1	153947668	153958625	11.3452	8.84632	-0.358935	0.2725	0.99965	NEUTRAL
XLOC_004123	SLC39A1	1	153959098	153977688	38.9552	35.1243	-0.149347	0.67955	0.99965	NEUTRAL
XLOC_004125	JTB	1	153959098	153977688	56.7523	50.8272	-0.159078	0.69115	0.99965	NEUTRAL
XLOC_004126	RAB13	1	153981616	153986358	70.0755	79.9029	0.189338	0.48535	0.99965	NEUTRAL
XLOC_004130	TPM3	1	154155303	154194648	141.793	131.589	-0.107746	0.7199	0.99965	NEUTRAL
XLOC_004134	C1orf43	1	154206705	154271510	78.6082	75.2573	-0.0628485	0.8746	0.99965	NEUTRAL
XLOC_004140	UBE2Q1	1	154548576	154559028	36.0531	47.0518	0.384127	0.3869	0.99965	NEUTRAL
XLOC_004142	ADAR	1	154582061	154627999	41.531	40.7586	-0.0270858	0.9223	0.99965	NEUTRAL
XLOC_004145	PMVK	1	154924733	154936991	9.83914	7.18628	-0.453286	0.1692	0.99965	NEUTRAL
XLOC_004146	PBXIP1	1	154944075	154956123	24.0382	26.1768	0.122955	0.6493	0.99965	NEUTRAL
XLOC_004151	DPM3	1	155139890	155140595	30.7816	30.2952	-0.0229775	0.94625	0.99965	NEUTRAL
XLOC_004152	KRTCAP2,MUC1,RP11-201K10.3	1	155169407	155192916	94.9954	102.972	0.116323	0.6938	0.99965	NEUTRAL
XLOC_004153	THBS3	1	155195587	155227422	5.61493	8.67525	0.627637	0.2584	0.99965	NEUTRAL
XLOC_004154	GBAP1,RP11-263K19.6	1	155195587	155227422	3.46095	4.26425	0.301123	0.80075	0.99965	NEUTRAL
XLOC_004155	GBA	1	155234451	155244699	31.9313	40.5562	0.34495	0.25405	0.99965	NEUTRAL
XLOC_004157	FAM189B	1	155247204	155255483	17.3595	15.0231	-0.208538	0.4637	0.99965	NEUTRAL
XLOC_004158	SCAMP3	1	155255978	155262430	43.7788	42.5684	-0.040448	0.8785	0.99965	NEUTRAL
XLOC_004159	CLK2	1	155262867	155301434	7.29217	10.4203	0.514974	0.1581	0.99965	NEUTRAL
XLOC_004161	RUSC1-AS1	1	155308747	155331114	2.2911	2.71491	0.24486	0.83275	0.99965	NEUTRAL
XLOC_004162	ASH1L	1	155335267	155563944	7.6554	7.99771	0.0631094	0.8288	0.99965	NEUTRAL
XLOC_004168	YY1AP1	1	155609775	155739010	16.723	14.1619	-0.239822	0.58035	0.99965	NEUTRAL
XLOC_004170	GON4L	1	155745828	155859400	7.23357	7.84789	0.117598	0.77065	0.99965	NEUTRAL
XLOC_004171	RIT1	1	155897807	155911404	20.394	21.8139	0.0971084	0.777	0.99965	NEUTRAL
XLOC_004172	KIAA0907	1	155913042	155934400	11.7947	12.3901	0.071043	0.8189	0.99965	NEUTRAL
XLOC_004175	ARHGEF2	1	155946850	156007070	41.5384	42.665	0.0386072	0.906	0.99965	NEUTRAL
XLOC_004177	SSR2	1	156009047	156020959	150.235	160.399	0.0944371	0.71965	0.99965	NEUTRAL
XLOC_004178	UBQLN4	1	156035300	156053794	10.2546	8.67009	-0.242158	0.44035	0.99965	NEUTRAL
XLOC_004179	MEX3A	1	156072012	156081998	1.04815	1.59947	0.60975	0.08135	0.99965	NEUTRAL
XLOC_004181	PAQR6	1	156212981	156248117	0.608972	0.904553	0.570828	0.5853	0.99965	NEUTRAL
XLOC_004182	SMG5	1	156249223	156282825	18.3664	17.5846	-0.0627528	0.83895	0.99965	NEUTRAL
XLOC_004183	GLMP	1	156282934	156295689	20.3612	16.1765	-0.331926	0.35075	0.99965	NEUTRAL
XLOC_004185	CCT3	1	156308967	156367873	69.9138	71.3298	0.0289264	0.91565	0.99965	NEUTRAL
XLOC_004188	MEF2D	1	156463726	156500828	20.7251	16.7173	-0.310045	0.2883	0.99965	NEUTRAL
XLOC_004192	GPATCH4	1	156594486	156601496	7.47285	6.59635	-0.179991	0.5537	0.99965	NEUTRAL
XLOC_004197	NES	1	156668762	156677397	1.17437	0.915078	-0.359921	0.33065	0.99965	NEUTRAL
XLOC_004199	CRABP2	1	156699605	156705816	16.0143	18.6546	0.220173	0.4934	0.99965	NEUTRAL
XLOC_004200	RP11-66D17.5	1	156712211	156713174	0.32703	0.491611	0.588095	0.63545	0.99965	NEUTRAL
XLOC_004201	ISG20L2	1	156721890	156736960	10.8324	10.2156	-0.0845781	0.84555	0.99965	NEUTRAL
XLOC_004202	MRPL24	1	156737302	156741590	24.4465	21.5374	-0.182784	0.54195	0.99965	NEUTRAL
XLOC_004203	HDGF	1	156742106	156800817	86.1105	76.9878	-0.161559	0.60165	0.99965	NEUTRAL
XLOC_004206	ARHGEF11	1	156934839	157045370	7.36435	8.16527	0.148942	0.64615	0.99965	NEUTRAL
XLOC_004211	ETV3	1	157121190	157138474	5.78285	5.15703	-0.165241	0.57025	0.99965	NEUTRAL
XLOC_004256	C1orf204,CFAP45,RP11-190A12.7,VSIG8	1	159826749	159900163	1.46614	1.55598	0.0858082	0.87575	0.99965	NEUTRAL
XLOC_004260	TAGLN2	1	159918106	159925732	268.908	224.438	-0.260796	0.36505	0.99965	NEUTRAL
XLOC_004262	SLAMF9	1	159951491	159954254	0.839736	0.493068	-0.76815	0.29545	0.99965	NEUTRAL
XLOC_004264	RP11-226L15.5	1	160024952	160026794	1.17251	1.13215	-0.050528	0.917	0.99965	NEUTRAL
XLOC_004265	PIGM	1	160027672	160031991	1.4406	1.37575	-0.0664588	0.86015	0.99965	NEUTRAL
XLOC_004267	IGSF8	1	160091339	160098943	15.5931	15.6951	0.00940349	0.9744	0.99965	NEUTRAL
XLOC_004269	DCAF8,PEX19,RP11-574F21.3	1	160215714	160286348	57.3411	63.6987	0.151694	0.662	0.99965	NEUTRAL
XLOC_004271	COPA	1	160289272	160358952	56.7542	59.6014	0.0706193	0.8665	0.99965	NEUTRAL
XLOC_004285	USF1	1	161039250	161045977	13.627	14.9316	0.131898	0.665	0.99965	NEUTRAL
XLOC_004288	PFDN2	1	161100555	161132688	39.2532	44.236	0.172412	0.7021	0.99965	NEUTRAL
XLOC_004289	DEDD	1	161100555	161132688	13.5391	14.3314	0.0820458	0.86095	0.99965	NEUTRAL
XLOC_004291	RP11-297K8.2	1	161152775	161159349	5.53184	6.71395	0.279403	0.873	0.99965	NEUTRAL
XLOC_004292	B4GALT3	1	161166409	161178013	14.3142	11.0074	-0.378977	0.304	0.99965	NEUTRAL
XLOC_004293	ADAMTS4	1	161184307	161214395	0.412637	0.409362	-0.011498	0.9924	0.99965	NEUTRAL
XLOC_004295	NR1I3	1	161225938	161238302	2.3653	1.29124	-0.873269	0.248	0.99965	NEUTRAL
XLOC_004296	MPZ	1	161304734	161309972	0.482439	0.304137	-0.665628	0.408	0.99965	NEUTRAL
XLOC_004297	CFAP126	1	161314256	161375340	0.646416	0.661658	0.0336231	0.8634	0.99965	NEUTRAL
XLOC_004308	OLFML2B	1	161983191	162023854	4.61133	5.3451	0.213036	0.5035	0.99965	NEUTRAL
XLOC_004316	RGS5	1	163111120	163355764	3.50783	3.63482	0.0513045	0.9292	0.99965	NEUTRAL
XLOC_004328	ALDH9A1	1	165662215	165709968	20.256	19.186	-0.0782922	0.775	0.99965	NEUTRAL
XLOC_004330	TMCO1	1	165724292	165911618	60.4706	58.1728	-0.0558893	0.8909	0.99965	NEUTRAL
XLOC_004339	TADA1	1	166856509	166876327	2.60904	2.85299	0.128954	0.7296	0.99965	NEUTRAL
XLOC_004348	CREG1	1	167529676	167553767	22.6867	18.8651	-0.266124	0.331	0.99965	NEUTRAL
XLOC_004352	MPC2	1	167916728	168075843	29.4142	25.7294	-0.193092	0.7519	0.99965	NEUTRAL
XLOC_004354	GPR161	1	168079542	168137667	5.03113	5.16551	0.0380289	0.9189	0.99965	NEUTRAL
XLOC_004355	ANKRD36BP1	1	168225937	168253025	2.86986	2.98227	0.0554312	0.9475	0.99965	NEUTRAL
XLOC_004366	NME7	1	169105696	169367967	4.98962	4.16094	-0.262019	0.6507	0.99965	NEUTRAL
XLOC_004368	SLC19A2	1	169463908	169486003	4.44957	3.12662	-0.509059	0.10055	0.99965	NEUTRAL
XLOC_004374	METTL18	1	169662006	169894267	2.04561	1.92345	-0.0888363	0.91285	0.99965	NEUTRAL
XLOC_004375	SCYL3	1	169662006	169894267	2.8586	2.64725	-0.110814	0.78795	0.99965	NEUTRAL
XLOC_004376	KIFAP3	1	169921325	170085208	13.4065	10.4586	-0.35824	0.1961	0.99965	NEUTRAL
XLOC_004396	VAMP4	1	171700159	171742247	9.15795	7.91578	-0.210292	0.57235	0.99965	NEUTRAL
XLOC_004400	DNM3OS,MIR214	1	171841497	172468831	1.27094	2.22295	0.806583	0.33215	0.99965	NEUTRAL
XLOC_004402	PIGC	1	171841497	172468831	6.67284	5.7057	-0.225897	0.5829	0.99965	NEUTRAL
XLOC_004413	CENPL	1	173799549	173858546	2.27155	2.37023	0.0613522	0.89935	0.99965	NEUTRAL
XLOC_004414	GAS5	1	173863247	173903549	380.713	500.052	0.393374	0.1679	0.99965	NEUTRAL
XLOC_004416	RC3H1	1	173931213	174022297	3.02494	2.55821	-0.241775	0.45765	0.99965	NEUTRAL
XLOC_004427	MRPS14	1	174999162	175023425	8.86885	7.5219	-0.23765	0.6674	0.99965	NEUTRAL
XLOC_004435	RFWD2	1	175944830	176207493	11.2489	10.5796	-0.0884931	0.76125	0.99965	NEUTRAL
XLOC_004446	SEC16B	1	177923955	178038007	4.37216	4.95994	0.181974	0.6542	0.99965	NEUTRAL
XLOC_004447	RASAL2-AS1	1	178091507	178093984	0.701857	0.622729	-0.172573	0.80155	0.99965	NEUTRAL
XLOC_004456	ABL2	1	179099326	179229684	9.01116	8.74665	-0.0429838	0.92085	0.99965	NEUTRAL
XLOC_004464	TOR1AIP2	1	179839966	179877803	16.1677	13.6755	-0.241516	0.47265	0.99965	NEUTRAL
XLOC_004470	ACBD6	1	180230285	180502954	28.8177	31.384	0.123072	0.7089	0.99965	NEUTRAL
XLOC_004475	STX6	1	180913153	181023121	13.4379	12.0215	-0.16069	0.56505	0.99965	NEUTRAL
XLOC_004476	KIAA1614-AS1	1	180913153	181023121	0.616986	0.743254	0.268617	0.31295	0.99965	NEUTRAL
XLOC_004484	GLUL	1	182381703	182392206	34.8694	35.6956	0.0337856	0.9273	0.99965	NEUTRAL
XLOC_004487	RNASEL	1	182573633	182589256	1.79609	1.50516	-0.254944	0.4697	0.99965	NEUTRAL
XLOC_004498	NMNAT2	1	183248236	183418602	1.27147	0.953363	-0.415403	0.37025	0.99965	NEUTRAL
XLOC_004501	NCF2	1	183460873	183598246	0.731309	0.457317	-0.677289	0.636	0.99965	NEUTRAL
XLOC_004502	ARPC5	1	183620845	183635757	200.309	169.794	-0.238442	0.4634	0.99965	NEUTRAL
XLOC_004507	COLGALT2	1	183929853	184037729	2.22144	1.93445	-0.199575	0.5533	0.99965	NEUTRAL
XLOC_004510	EDEM3	1	184690230	184754913	9.98129	10.5483	0.0797184	0.8252	0.99965	NEUTRAL
XLOC_004511	FAM129A	1	184790723	184974550	4.61886	3.47363	-0.411092	0.1433	0.99965	NEUTRAL
XLOC_004515	TRMT1L	1	185118097	185157072	4.37592	4.3286	-0.0156844	0.9703	0.99965	NEUTRAL
XLOC_004521	IVNS1ABP	1	185296387	185317329	49.0467	73.5816	0.585189	0.0356	0.99965	NEUTRAL
XLOC_004526	GS1-174L6.4	1	185734550	186190949	0.466437	0.863236	0.888072	0.7345	0.99965	NEUTRAL
XLOC_004527	TPR	1	186296278	186375693	9.73089	10.8517	0.157273	0.57575	0.99965	NEUTRAL
XLOC_004531	PTGS2	1	186671790	186680427	12.7248	7.80655	-0.704889	0.0175	0.99965	NEUTRAL
XLOC_004555	UCHL5	1	193012249	193091777	10.2489	10.4936	0.0340473	0.9606	0.99965	NEUTRAL
XLOC_004557	RP11-101E13.5	1	193012249	193091777	9.31539	6.49529	-0.520222	0.6475	0.99965	NEUTRAL
XLOC_004558	GLRX2	1	193096467	193106114	11.2045	10.7672	-0.057447	0.8719	0.99965	NEUTRAL
XLOC_004559	B3GALT2	1	193122016	193253901	1.40509	1.65091	0.232604	0.8102	0.99965	NEUTRAL
XLOC_004571	ZBTB41	1	197153679	197200542	5.27857	4.54318	-0.216443	0.42855	0.99965	NEUTRAL
XLOC_004573	DENND1B	1	197504747	197775696	2.89857	2.33657	-0.310951	0.3775	0.99965	NEUTRAL
XLOC_004591	ZNF281	1	200404939	200410056	16.9033	14.7283	-0.198711	0.4744	0.99965	NEUTRAL
XLOC_004593	DDX59	1	200623895	200694250	4.21525	2.9017	-0.538721	0.25385	0.99965	NEUTRAL
XLOC_004598	TMEM9	1	201134771	201171574	37.8686	42.3007	0.159681	0.58085	0.99965	NEUTRAL
XLOC_004602	PHLDA3	1	201464382	201469237	71.5901	82.9117	0.211815	0.49745	0.99965	NEUTRAL
XLOC_004603	CSRP1	1	201483529	201533608	288.342	304.803	0.0800995	0.8109	0.99965	NEUTRAL
XLOC_004605	IPO9-AS1	1	201622884	201884294	3.91443	3.17853	-0.300442	0.903	0.99965	NEUTRAL
XLOC_004607	LMOD1	1	201893841	201946588	17.4353	24.4951	0.490483	0.068	0.99965	NEUTRAL
XLOC_004609	RP11-465N4.5	1	201982371	202017188	1.15611	1.29197	0.160291	0.62275	0.99965	NEUTRAL
XLOC_004611	ARL8A	1	202122857	202144743	18.6649	14.7354	-0.341045	0.2415	0.99965	NEUTRAL
XLOC_004613	UBE2T	1	202331656	202341980	3.82796	3.01782	-0.343068	0.44615	0.99965	NEUTRAL
XLOC_004619	KDM5B	1	202724490	202809470	21.2855	23.7497	0.158038	0.57055	0.99965	NEUTRAL
XLOC_004623	RABIF	1	202878956	202889135	3.78059	3.59767	-0.0715499	0.83115	0.99965	NEUTRAL
XLOC_004624	KLHL12	1	202891099	202928636	9.42951	9.94144	0.0762732	0.803	0.99965	NEUTRAL
XLOC_004626	ADIPOR1	1	202940822	202958572	60.497	55.19	-0.132458	0.6298	0.99965	NEUTRAL
XLOC_004627	CYB5R1	1	202961868	202967280	25.7561	23.9227	-0.106537	0.70515	0.99965	NEUTRAL
XLOC_004633	CHI3L1	1	203178930	203186749	121.203	98.0141	-0.306364	0.283	0.99965	NEUTRAL
XLOC_004637	FMOD	1	203340627	203351489	0.750058	0.595666	-0.332499	0.61025	0.99965	NEUTRAL
XLOC_004646	ETNK2	1	204131061	204152003	1.9297	1.99669	0.049232	0.93435	0.99965	NEUTRAL
XLOC_004648	KISS1	1	204190340	204196486	2.49291	3.14201	0.33386	0.5162	0.99965	NEUTRAL
XLOC_004653	PPP1R15B	1	204377849	204494724	7.9989	6.31269	-0.341545	0.22795	0.99965	NEUTRAL
XLOC_004659	TMEM81	1	205083128	205084460	2.28455	1.94177	-0.234542	0.61195	0.99965	NEUTRAL
XLOC_004660	RBBP5	1	205086141	205122015	5.39449	4.40903	-0.291028	0.3212	0.99965	NEUTRAL
XLOC_004661	DSTYK	1	205142504	205211566	4.48354	4.34594	-0.0449699	0.87075	0.99965	NEUTRAL
XLOC_004663	NUAK2	1	205302058	205321755	3.4785	3.24214	-0.101519	0.7496	0.99965	NEUTRAL
XLOC_004667	ELK4	1	205568884	205631962	5.49592	6.92518	0.333491	0.35685	0.99965	NEUTRAL
XLOC_004668	SLC45A3	1	205657850	205680459	0.695565	0.716819	0.0434225	0.9273	0.99965	NEUTRAL
XLOC_004669	NUCKS1	1	205712818	205750276	33.2392	39.1136	0.234786	0.4657	0.99965	NEUTRAL
XLOC_004671	RAB29	1	205767985	205775460	6.45235	5.18567	-0.315294	0.3323	0.99965	NEUTRAL
XLOC_004672	SLC41A1	1	205789092	205813748	20.8998	16.9189	-0.304854	0.3109	0.99965	NEUTRAL
XLOC_004675	RAB7B	1	205976739	206003461	3.39188	3.47383	0.0344425	0.925	0.99965	NEUTRAL
XLOC_004684	EIF2D	1	206507529	206612463	14.993	17.386	0.213639	0.48485	0.99965	NEUTRAL
XLOC_004693	YOD1	1	207006844	207099993	2.65646	2.30477	-0.204879	0.55655	0.99965	NEUTRAL
XLOC_004701	PLXNA2	1	208022241	208244320	2.27592	2.25481	-0.0134413	0.9712	0.99965	NEUTRAL
XLOC_004709	LAMB3	1	209614869	209652466	3.42103	2.7417	-0.31936	0.563	0.99965	NEUTRAL
XLOC_004711	C1orf74	1	209756031	209784559	0.695941	0.767949	0.142046	0.7369	0.99965	NEUTRAL
XLOC_004723	SLC30A1	1	211571567	211578742	21.7858	17.1482	-0.345329	0.2075	0.99965	NEUTRAL
XLOC_004730	LPGAT1	1	211743456	211853703	10.7266	10.0556	-0.0931899	0.7445	0.99965	NEUTRAL
XLOC_004732	INTS7	1	211940398	212035542	6.1526	5.59136	-0.137998	0.6715	0.99965	NEUTRAL
XLOC_004738	TMEM206	1	212363930	212414901	6.53941	4.87144	-0.424812	0.2806	0.99965	NEUTRAL
XLOC_004744	NSL1	1	212726152	212791782	7.69473	7.53825	-0.0296416	0.9399	0.99965	NEUTRAL
XLOC_004748	ANGEL2	1	212992181	213015826	7.30887	7.03371	-0.0553613	0.89695	0.99965	NEUTRAL
XLOC_004754	PTPN14	1	214344171	214552449	31.5579	29.1142	-0.116281	0.779	0.99965	NEUTRAL
XLOC_004762	GPATCH2	1	217426991	217631082	3.16858	3.10324	-0.0300613	0.93415	0.99965	NEUTRAL
XLOC_004771	RIMKLBP2	1	219086601	219212865	0.626353	0.752474	0.264665	0.89165	0.99965	NEUTRAL
XLOC_004777	EPRS	1	219968600	220046658	49.0934	52.1638	0.0875212	0.8116	0.99965	NEUTRAL
XLOC_004778	BPNT1	1	220057481	220090462	9.73413	10.6319	0.127276	0.75245	0.99965	NEUTRAL
XLOC_004782	RAB3GAP2	1	220148292	220272454	9.49936	9.28374	-0.0331239	0.9022	0.99965	NEUTRAL
XLOC_004795	DUSP10	1	221701423	221742176	6.66668	7.1702	0.105047	0.76765	0.99965	NEUTRAL
XLOC_004799	RP11-400N13.3	1	222041704	222064763	1.65395	0.922817	-0.841798	0.27135	0.99965	NEUTRAL
XLOC_004803	RP11-378J18.9	1	222477251	222504622	1.94568	3.11275	0.677917	0.27115	0.99965	NEUTRAL
XLOC_004807	TAF1A	1	222557901	222593032	2.75572	1.50147	-0.876057	0.0541	0.99965	NEUTRAL
XLOC_004809	RP11-378J18.8	1	222618085	222668012	0.845222	0.54761	-0.626182	0.45725	0.99965	NEUTRAL
XLOC_004810	AIDA	1	222668012	222735196	40.8238	35.9937	-0.181666	0.58885	0.99965	NEUTRAL
XLOC_004815	TP53BP2	1	223779898	223845972	10.0066	8.68829	-0.203801	0.4675	0.99965	NEUTRAL
XLOC_004818	RP11-504P24.8	1	223951387	223953439	1.2735	1.94165	0.608483	0.16635	0.99965	NEUTRAL
XLOC_004825	NVL	1	224219612	224330387	6.24692	5.29484	-0.238559	0.5798	0.99965	NEUTRAL
XLOC_004827	WDR26	1	224385142	224740549	34.8943	35.3127	0.0171951	0.9627	0.99965	NEUTRAL
XLOC_004832	LBR	1	225401501	225428925	6.51575	5.2175	-0.320571	0.2628	0.99965	NEUTRAL
XLOC_004834	ENAH	1	225486834	225653142	114.837	123.651	0.106684	0.7663	0.99965	NEUTRAL
XLOC_004836	TMEM63A	1	225810091	225882369	7.69841	10.1995	0.405863	0.49755	0.99965	NEUTRAL
XLOC_004837	LEFTY1,PYCR2,RP4-559A3.7	1	225886281	225924340	23.9948	23.3431	-0.0397254	0.88355	0.99965	NEUTRAL
XLOC_004839	SDE2	1	225982701	225999331	6.78728	5.24879	-0.370849	0.20395	0.99965	NEUTRAL
XLOC_004841	ACBD3	1	226144678	226186730	21.5979	19.5655	-0.142575	0.5905	0.99965	NEUTRAL
XLOC_004843	LIN9	1	226231148	226309869	0.800971	0.526326	-0.605792	0.22965	0.99965	NEUTRAL
XLOC_004846	PARP1	1	226360690	226408079	13.5457	16.0614	0.245761	0.4667	0.99965	NEUTRAL
XLOC_004849	ITPKB	1	226631689	226739323	1.39814	1.45938	0.0618487	0.8604	0.99965	NEUTRAL
XLOC_004852	CDC42BPA	1	226989864	227318474	9.93078	10.0089	0.011298	0.9676	0.99965	NEUTRAL
XLOC_004859	JMJD4	1	227728538	227781231	2.69974	3.09486	0.197056	0.757	0.99965	NEUTRAL
XLOC_004865	C1orf35	1	228100725	228105411	3.60563	4.38492	0.282298	0.47005	0.99965	NEUTRAL
XLOC_004866	MRPL55	1	228106678	228109312	23.1351	24.9114	0.106722	0.73425	0.99965	NEUTRAL
XLOC_004870	C1orf145	1	228203505	228378876	0.427972	0.665886	0.637756	0.6039	0.99965	NEUTRAL
XLOC_004875	TRIM11	1	228393672	228406840	5.49595	5.05574	-0.120445	0.73905	0.99965	NEUTRAL
XLOC_004879	HIST3H2A	1	228456978	228457873	2.03661	2.35162	0.207488	0.68105	0.99965	NEUTRAL
XLOC_004904	RP5-1061H20.3,RP5-1061H20.4	1	229258280	229305894	0.646024	0.57076	-0.178703	0.923	0.99965	NEUTRAL
XLOC_004905	CCSAP	1	229319402	229343294	3.0606	3.43971	0.168471	0.58185	0.99965	NEUTRAL
XLOC_004908	NUP133	1	229440259	229508341	10.4191	8.8959	-0.228019	0.55745	0.99965	NEUTRAL
XLOC_004909	ABCB10	1	229516581	229558695	3.52702	2.65284	-0.410913	0.2058	0.99965	NEUTRAL
XLOC_004911	TAF5L	1	229593110	229626047	4.2868	4.55173	0.0865136	0.7801	0.99965	NEUTRAL
XLOC_004917	RP5-956O18.3	1	230057989	230282124	40.1258	31.1508	-0.365262	0.6342	0.99965	NEUTRAL
XLOC_004921	AGT	1	230702522	230802003	1.07256	0.752435	-0.51142	0.3271	0.99965	NEUTRAL
XLOC_004923	C1orf198	1	230837118	230869589	47.7294	54.3026	0.186142	0.4864	0.99965	NEUTRAL
XLOC_004924	TTC13	1	230906242	230978875	10.6695	7.68175	-0.473981	0.12565	0.99965	NEUTRAL
XLOC_004926	FAM89A	1	231018957	231040246	3.4112	4.76001	0.480689	0.40405	0.99965	NEUTRAL
XLOC_004929	C1orf131	1	231223762	231241187	4.36711	5.13039	0.232387	0.5596	0.99965	NEUTRAL
XLOC_004931	EXOC8	1	231332752	231355023	3.62888	3.10296	-0.225878	0.5164	0.99965	NEUTRAL
XLOC_004932	EGLN1	1	231363750	231425044	17.6129	15.0651	-0.22542	0.43655	0.99965	NEUTRAL
XLOC_004934	RP11-295G20.2	1	231522387	231528556	3.07345	3.45468	0.168696	0.76565	0.99965	NEUTRAL
XLOC_004938	SIPA1L2	1	232397964	232561558	3.47509	3.87496	0.157129	0.6535	0.99965	NEUTRAL
XLOC_004941	PCNXL2	1	232950604	233295727	3.40721	3.91825	0.201616	0.7609	0.99965	NEUTRAL
XLOC_004950	TARBP1	1	234391312	234479103	4.10462	5.18098	0.335977	0.318	0.99965	NEUTRAL
XLOC_004952	IRF2BP2	1	234604268	234609525	27.8432	29.0048	0.0589674	0.84955	0.99965	NEUTRAL
XLOC_004960	TOMM20	1	235109335	235128936	65.5813	65.9447	0.00797171	0.98055	0.99965	NEUTRAL
XLOC_004962	ARID4B,RBM34	1	235131182	235344532	39.5373	32.1904	-0.296585	0.53125	0.99965	NEUTRAL
XLOC_004965	B3GALNT2	1	235449922	235504481	5.5258	6.78341	0.295826	0.4297	0.99965	NEUTRAL
XLOC_004971	LYST	1	235661040	235883640	3.47294	3.44591	-0.0112747	0.9826	0.99965	NEUTRAL
XLOC_004975	NID1	1	235975829	236065162	19.6739	19.6379	-0.00264688	0.9927	0.99965	NEUTRAL
XLOC_004976	ERO1LB	1	236142504	236281985	0.585448	0.448259	-0.385211	0.59925	0.99965	NEUTRAL
XLOC_004979	RP11-385F5.5	1	236517999	236604504	0.694921	0.352208	-0.980424	0.74635	0.99965	NEUTRAL
XLOC_004980	HEATR1	1	236517999	236604504	8.23629	8.63018	0.0673967	0.8464	0.99965	NEUTRAL
XLOC_004990	LINC01139	1	238480383	238538305	1.46519	2.14722	0.551385	0.22925	0.99965	NEUTRAL
XLOC_004999	RP11-567G24.3	1	240014347	240475189	2.7872	3.36235	0.270652	0.8037	0.99965	NEUTRAL
XLOC_005001	GREM2	1	240489572	240612149	14.5604	11.6862	-0.317237	0.2486	0.99965	NEUTRAL
XLOC_005007	RGS7	1	240775513	241357230	0.746777	0.509962	-0.550286	0.29695	0.99965	NEUTRAL
XLOC_005011	FH	1	241497602	241519761	30.4426	35.0051	0.201473	0.51355	0.99965	NEUTRAL
XLOC_005012	OPN3	1	241532133	241802133	7.83307	6.25744	-0.324006	0.52415	0.99965	NEUTRAL
XLOC_005013	CHML	1	241532133	241802133	1.93333	2.02917	0.0697964	0.85805	0.99965	NEUTRAL
XLOC_005023	LINC01347,RP11-261C10.7	1	243054860	243101744	0.721668	0.734706	0.0258323	0.95645	0.99965	NEUTRAL
XLOC_005025	CEP170	1	243124427	243255348	31.5108	40.3937	0.358285	0.3558	0.99965	NEUTRAL
XLOC_005027	AKT3	1	243256033	243851079	25.3925	21.8283	-0.218203	0.5775	0.99965	NEUTRAL
XLOC_005031	ADSS	1	244352634	244452134	21.102	17.3346	-0.283729	0.30255	0.99965	NEUTRAL
XLOC_005036	HNRNPU,RP11-11N7.5	1	244835321	244864542	64.143	63.6116	-0.0120024	0.9668	0.99965	NEUTRAL
XLOC_005044	SMYD3	1	245749341	246507312	21.8048	20.2227	-0.108667	0.74825	0.99965	NEUTRAL
XLOC_005050	TFB2M	1	246540559	246566324	6.54261	5.25793	-0.315372	0.3303	0.99965	NEUTRAL
XLOC_005055	AHCTF1	1	246839097	246931978	12.6763	12.3307	-0.039876	0.9456	0.99965	NEUTRAL
XLOC_005056	ZNF670,ZNF695	1	246945546	247078811	1.45696	1.02569	-0.506365	0.29015	0.99965	NEUTRAL
XLOC_005058	ZNF669	1	247099961	247104372	1.43022	1.72561	0.270868	0.57895	0.99965	NEUTRAL
XLOC_005060	ZNF124	1	247121974	247172016	0.587322	0.315759	-0.895327	0.2805	0.99965	NEUTRAL
XLOC_005062	RP11-488L18.10	1	247187280	247188526	2.26429	1.5321	-0.563548	0.2395	0.99965	NEUTRAL
XLOC_005063	MIR3916,RP11-488L18.4,RP11-488L18.8	1	247189850	247241823	6.94094	8.08247	0.219665	0.6343	0.99965	NEUTRAL
XLOC_005066	ZNF496	1	247297411	247331846	7.64862	6.32055	-0.27515	0.4072	0.99965	NEUTRAL
XLOC_005094	SH3BP5L	1	248810445	248826633	15.8114	13.6594	-0.211064	0.4578	0.99965	NEUTRAL
XLOC_005095	ZNF692	1	248850005	248859144	12.3299	11.1454	-0.145715	0.66715	0.99965	NEUTRAL
XLOC_005098	ZMYND11	10	134464	254637	24.2056	26.2534	0.117162	0.6876	0.99965	NEUTRAL
XLOC_005105	GTPBP4	10	971145	1049170	30.5982	31.5097	0.0423468	0.9356	0.99965	NEUTRAL
XLOC_005107	WDR37	10	1049537	1132297	5.74536	5.93651	0.0472189	0.88235	0.99965	NEUTRAL
XLOC_005118	PFKP	10	3066332	3172841	94.8646	86.9213	-0.126159	0.6872	0.99965	NEUTRAL
XLOC_005132	AKR1E2	10	4786628	4848062	0.868759	1.71264	0.979192	0.09725	0.99965	NEUTRAL
XLOC_005133	AKR1C1,AKR1C3	10	4922563	5135226	41.9146	22.8965	-0.872325	0.01015	0.99965	NEUTRAL
XLOC_005141	NET1	10	5412550	5458463	18.8833	17.8666	-0.0798486	0.80385	0.99965	NEUTRAL
XLOC_005145	FAM208B	10	5684837	5763740	9.02791	11.1039	0.298603	0.31835	0.99965	NEUTRAL
XLOC_005148	FBXO18	10	5890202	5978187	19.7675	16.3393	-0.274783	0.49195	0.99965	NEUTRAL
XLOC_005150	RBM17	10	6088986	6117457	25.5881	25.7639	0.00987994	0.97715	0.99965	NEUTRAL
XLOC_005151	PFKFB3	10	6144933	6235545	15.6047	19.7386	0.339037	0.2865	0.99965	NEUTRAL
XLOC_005166	ATP5C1	10	7788128	7807815	73.4463	72.5718	-0.0172823	0.9477	0.99965	NEUTRAL
XLOC_005167	TAF3	10	7818503	8016627	2.03226	1.7566	-0.210298	0.5294	0.99965	NEUTRAL
XLOC_005184	CELF2	10	11005295	11336675	0.574844	0.446237	-0.36536	0.54135	0.99965	NEUTRAL
XLOC_005188	ECHDC3	10	11742365	11764070	3.44532	2.92346	-0.236963	0.543	0.99965	NEUTRAL
XLOC_005189	PROSER2	10	11823338	11894700	2.30525	2.04011	-0.176278	0.71075	0.99965	NEUTRAL
XLOC_005191	DHTKD1	10	12068971	12123225	1.71771	1.65862	-0.0505036	0.9595	0.99965	NEUTRAL
XLOC_005192	SEC61A2	10	12129636	12250589	3.12804	3.68043	0.234616	0.77435	0.99965	NEUTRAL
XLOC_005193	CDC123	10	12129636	12250589	32.0223	28.8712	-0.149447	0.6957	0.99965	NEUTRAL
XLOC_005194	CAMK1D	10	12349481	12835545	5.66933	4.46312	-0.345125	0.38225	0.99965	NEUTRAL
XLOC_005198	OPTN	10	12896624	13138308	41.9459	39.5641	-0.0843376	0.7715	0.99965	NEUTRAL
XLOC_005203	PRPF18,RP11-295P9.3	10	13586926	14462142	12.1571	11.402	-0.0925087	0.82345	0.99965	NEUTRAL
XLOC_005216	HSPA14	10	14819249	14871741	10.7183	11.6308	0.117866	0.7339	0.99965	NEUTRAL
XLOC_005217	SUV39H2	10	14878819	14954432	1.49746	1.14829	-0.383026	0.5387	0.99965	NEUTRAL
XLOC_005220	RPP38	10	15095384	15168693	3.36118	3.39157	0.0129858	0.9945	0.99965	NEUTRAL
XLOC_005224	PTER	10	16436942	16522005	1.85802	1.74783	-0.0881973	0.8278	0.99965	NEUTRAL
XLOC_005227	VIM	10	17214238	17237593	1619.48	1552.35	-0.0610736	0.84885	0.99965	NEUTRAL
XLOC_005232	STAM	10	17644124	17715914	14.4358	14.5294	0.00932579	0.973	0.99965	NEUTRAL
XLOC_005239	ARL5B	10	18659404	18681639	5.03795	4.49394	-0.164854	0.5667	0.99965	NEUTRAL
XLOC_005247	PLXDC2	10	19816238	20289856	1.95753	2.49216	0.348364	0.41345	0.99965	NEUTRAL
XLOC_005262	MLLT10	10	21534164	21743630	5.16168	9.51829	0.882862	0.1296	0.99965	NEUTRAL
XLOC_005272	BMI1,COMMD3,COMMD3-BMI1	10	22315973	22331484	66.2865	71.652	0.112292	0.75965	0.99965	NEUTRAL
XLOC_005279	MSRB2	10	23095505	23122013	12.0802	13.9387	0.20645	0.5886	0.99965	NEUTRAL
XLOC_005286	OTUD1	10	23439457	23442390	2.80927	1.77994	-0.658362	0.0745	0.99965	NEUTRAL
XLOC_005287	KIAA1217	10	23694745	24547848	7.70857	6.52682	-0.240083	0.4343	0.99965	NEUTRAL
XLOC_005295	THNSL1	10	24981978	25062279	1.12111	1.02311	-0.131977	0.74425	0.99965	NEUTRAL
XLOC_005302	APBB1IP	10	26438202	26567803	7.33769	5.0188	-0.547984	0.0693	0.99965	NEUTRAL
XLOC_005307	PDSS1	10	26697658	26861087	1.14429	1.60835	0.491123	0.7479	0.99965	NEUTRAL
XLOC_005311	MASTL	10	27110111	27186924	2.77841	2.74339	-0.0182989	0.98595	0.99965	NEUTRAL
XLOC_005317	RAB18	10	27504173	27542237	55.4012	50.6421	-0.129581	0.7418	0.99965	NEUTRAL
XLOC_005324	WAC	10	28522651	28623112	36.5169	36.5505	0.00132544	0.99555	0.99965	NEUTRAL
XLOC_005328	BAMBI	10	28677341	28682939	23.02	25.131	0.126581	0.64385	0.99965	NEUTRAL
XLOC_005333	SVIL-AS1	10	29409401	29736781	22.7239	20.5468	-0.145293	0.8336	0.99965	NEUTRAL
XLOC_005340	MAP3K8	10	30433936	30461833	1.21903	0.967402	-0.333542	0.5919	0.99965	NEUTRAL
XLOC_005347	ZEB1	10	31187882	31529814	26.0912	27.3501	0.0679824	0.8553	0.99965	NEUTRAL
XLOC_005357	RP11-135A24.4	10	32266288	32378798	0.603354	1.04942	0.798514	0.551	0.99965	NEUTRAL
XLOC_005362	RP11-342D11.2	10	33177491	33336262	30.8151	25.6767	-0.263177	0.838	0.99965	NEUTRAL
XLOC_005367	PARD3-AS1	10	34815766	34816386	0.319161	0.46476	0.5422	0.7597	0.99965	NEUTRAL
XLOC_005372	CREM	10	35098005	35212958	17.3287	12.2392	-0.501659	0.14415	0.99965	NEUTRAL
XLOC_005376	CCNY	10	35247024	35572669	24.6672	25.2703	0.0348505	0.93445	0.99965	NEUTRAL
XLOC_005398	ZNF33A	10	38010649	38065088	3.38903	4.32989	0.353458	0.3265	0.99965	NEUTRAL
XLOC_005399	ZNF37A	10	38094335	38125544	4.05852	5.18362	0.353007	0.28875	0.99965	NEUTRAL
XLOC_005406	HSD17B7P2	10	38356379	38378505	0.53039	0.46539	-0.188613	0.77985	0.99965	NEUTRAL
XLOC_005420	LINC00839	10	42475542	42495336	3.41094	2.69855	-0.337985	0.3432	0.99965	NEUTRAL
XLOC_005431	BMS1	10	42782800	42834937	3.90255	4.00741	0.0382534	0.89055	0.99965	NEUTRAL
XLOC_005435	CSGALNACT2	10	43138485	43185308	16.8113	13.1248	-0.357136	0.1946	0.99965	NEUTRAL
XLOC_005439	RP11-517P14.2	10	43420737	43422100	2.13186	1.1846	-0.847716	0.1791	0.99965	NEUTRAL
XLOC_005440	ZNF487	10	43436840	43483179	1.33969	1.03123	-0.377535	0.6309	0.99965	NEUTRAL
XLOC_005443	ZNF485	10	43606406	43617903	0.759402	0.826586	0.122301	0.8725	0.99965	NEUTRAL
XLOC_005446	ZNF32-AS1	10	43628816	43674703	3.0952	2.08185	-0.57217	0.6808	0.99965	NEUTRAL
XLOC_005447	ZNF32-AS2	10	43628816	43674703	0.945436	1.00089	0.0822306	0.95605	0.99965	NEUTRAL
XLOC_005460	RASSF4	10	44811023	44995891	2.26489	3.03858	0.423959	0.6286	0.99965	NEUTRAL
XLOC_005461	ZNF22	10	44997697	45181427	4.1381	3.54404	-0.223575	0.5676	0.99965	NEUTRAL
XLOC_005469	FAM21C	10	45706430	45792961	7.97343	8.12642	0.0274198	0.92785	0.99965	NEUTRAL
XLOC_005472	TIMM23	10	45972448	46003734	23.0334	23.5946	0.0347295	0.9031	0.99965	NEUTRAL
XLOC_005480	SYT15	10	46578216	46652025	0.556849	0.693566	0.316747	0.7976	0.99965	NEUTRAL
XLOC_005481	RP11-38L15.2	10	46578216	46652025	1.34668	1.92248	0.513563	0.67025	0.99965	NEUTRAL
XLOC_005485	BMS1P1	10	46753604	46811989	1.35412	1.55706	0.201477	0.5749	0.99965	NEUTRAL
XLOC_005488	PTPN20	10	46911395	47002488	0.321831	0.544915	0.759728	0.1603	0.99965	NEUTRAL
XLOC_005501	MAPK8	10	48306638	48439360	28.6619	31.1813	0.12155	0.7736	0.99965	NEUTRAL
XLOC_005515	TIMM23B	10	49818278	49982053	7.02976	7.07261	0.00876818	0.9827	0.99965	NEUTRAL
XLOC_005517	AGAP6	10	49982189	50010499	4.03834	4.1243	0.0303876	0.9274	0.99965	NEUTRAL
XLOC_005518	FAM21A	10	50067887	50133506	7.00228	9.96734	0.509384	0.1497	0.99965	NEUTRAL
XLOC_005524	BEND3P1	10	50655966	50660472	0.571947	0.654795	0.195162	0.70075	0.99965	NEUTRAL
XLOC_005527	ASAH2B	10	50739317	50885675	1.07048	1.19817	0.162575	0.70235	0.99965	NEUTRAL
XLOC_005529	PRKG1	10	50991357	52314128	3.10254	1.60345	-0.952273	0.1914	0.99965	NEUTRAL
XLOC_005535	DKK1	10	52314295	52318042	144.09	123.111	-0.227014	0.48625	0.99965	NEUTRAL
XLOC_005551	CISD1	10	58269057	58289586	19.308	19.4735	0.0123156	0.9743	0.99965	NEUTRAL
XLOC_005553	UBE2D1	10	58334974	58370753	11.0209	7.06838	-0.640795	0.06565	0.99965	NEUTRAL
XLOC_005554	TFAM	10	58385021	58399221	5.98074	5.91203	-0.0166693	0.9704	0.99965	NEUTRAL
XLOC_005555	BICC1	10	58513139	58831437	35.9263	33.5599	-0.0983046	0.71455	0.99965	NEUTRAL
XLOC_005558	LINC00844	10	58999625	59001543	0.561572	0.318238	-0.819365	0.5471	0.99965	NEUTRAL
XLOC_005566	CDK1	10	60778330	60794852	0.824897	0.64208	-0.361461	0.6043	0.99965	NEUTRAL
XLOC_005570	ARID5B	10	61901299	62096944	17.3324	16.6953	-0.0540292	0.83865	0.99965	NEUTRAL
XLOC_005574	ZNF365	10	62374191	62672011	2.38068	1.92642	-0.30545	0.3541	0.99965	NEUTRAL
XLOC_005575	ADO	10	62793561	62808483	8.58009	6.88478	-0.317581	0.2578	0.99965	NEUTRAL
XLOC_005577	NRBF2	10	63133246	63155031	15.7758	13.7999	-0.193056	0.50155	0.99965	NEUTRAL
XLOC_005583	REEP3	10	63521362	63625123	17.7663	11.9107	-0.576887	0.03695	0.99965	NEUTRAL
XLOC_005603	SIRT1	10	67884668	67918390	5.74421	5.64126	-0.0260906	0.93455	0.99965	NEUTRAL
XLOC_005604	MYPN	10	68106116	68212017	2.49722	1.66658	-0.583433	0.0734	0.99965	NEUTRAL
XLOC_005607	HNRNPH3	10	68282659	68407294	46.4796	52.0081	0.162141	0.67715	0.99965	NEUTRAL
XLOC_005616	CCAR1	10	68721011	68792377	15.3993	14.0438	-0.13293	0.7233	0.99965	NEUTRAL
XLOC_005620	DDX50	10	68901277	68946847	17.7236	18.2896	0.0453593	0.88105	0.99965	NEUTRAL
XLOC_005621	DDX21	10	68956127	68985073	22.6821	22.5436	-0.00883624	0.97085	0.99965	NEUTRAL
XLOC_005622	KIAA1279	10	68988720	69016982	15.7205	14.6722	-0.0995644	0.7171	0.99965	NEUTRAL
XLOC_005625	SRGN	10	69088105	69104811	730.721	604.073	-0.274598	0.32585	0.99965	NEUTRAL
XLOC_005627	VPS26A	10	69123511	69172861	20.9423	17.8641	-0.229359	0.43515	0.99965	NEUTRAL
XLOC_005628	SUPV3L1	10	69180231	69209099	9.97924	11.0433	0.146176	0.69225	0.99965	NEUTRAL
XLOC_005630	HK1	10	69269983	69401882	52.2395	52.7135	0.0130304	0.9672	0.99965	NEUTRAL
XLOC_005634	C10orf35	10	69630250	69633599	0.340012	0.476759	0.487677	0.567	0.99965	NEUTRAL
XLOC_005637	COL13A1	10	69801930	69964275	2.83151	1.69767	-0.738011	0.0674	0.99965	NEUTRAL
XLOC_005638	H2AFY2	10	70052795	70132934	4.52584	5.56895	0.299219	0.524	0.99965	NEUTRAL
XLOC_005641	EIF4EBP2	10	70404378	70428618	12.1878	9.78447	-0.316876	0.2439	0.99965	NEUTRAL
XLOC_005644	ADAMTS14	10	70672802	70762441	1.31165	0.800108	-0.71312	0.0594	0.99965	NEUTRAL
XLOC_005645	SGPL1	10	70815960	70881173	9.80049	10.3142	0.0737002	0.81085	0.99965	NEUTRAL
XLOC_005648	UNC5B	10	71212569	71302864	10.2363	12.4616	0.283796	0.2904	0.99965	NEUTRAL
XLOC_005649	SLC29A3	10	71319257	71363385	1.37979	1.66704	0.272842	0.55335	0.99965	NEUTRAL
XLOC_005654	CHST3	10	71964364	72013564	15.2308	13.3336	-0.191924	0.4767	0.99965	NEUTRAL
XLOC_005657	ANAPC16	10	72096031	72235860	25.5066	20.8499	-0.290833	0.4851	0.99965	NEUTRAL
XLOC_005659	DDIT4	10	72273919	72276036	33.2008	37.9071	0.191253	0.64185	0.99965	NEUTRAL
XLOC_005666	MCU	10	72692130	72887694	11.582	13.2123	0.190001	0.5227	0.99965	NEUTRAL
XLOC_005674	NUDT13	10	73110374	73358859	0.373075	0.414247	0.151026	0.9286	0.99965	NEUTRAL
XLOC_005675	FAM149B1	10	73110374	73358859	9.26634	8.45166	-0.132764	0.83005	0.99965	NEUTRAL
XLOC_005683	PPP3CB-AS1	10	73436427	73625953	0.391943	0.393925	0.00727793	0.99165	0.99965	NEUTRAL
XLOC_005689	DUSP8P5,GLUD1P3	10	73730561	73737311	1.09682	1.31036	0.256642	0.6518	0.99965	NEUTRAL
XLOC_005690	SEC24C	10	73744383	73780251	10.87	11.1006	0.0302835	0.9387	0.99965	NEUTRAL
XLOC_005691	FUT11	10	73744383	73780251	19.1098	17.3169	-0.142132	0.7776	0.99965	NEUTRAL
XLOC_005692	CHCHD1	10	73782046	73783652	12.4713	13.7384	0.139607	0.67325	0.99965	NEUTRAL
XLOC_005693	ZSWIM8	10	73785581	73811798	25.1968	30.3536	0.268623	0.65315	0.99965	NEUTRAL
XLOC_005694	RP11-574K11.5	10	73812500	73874591	0.625949	0.353495	-0.824354	0.7214	0.99965	NEUTRAL
XLOC_005696	PLAU	10	73909176	73922777	31.6677	24.7523	-0.355451	0.188	0.99965	NEUTRAL
XLOC_005697	VCL	10	73995192	74151063	65.2478	67.3159	0.0450181	0.8769	0.99965	NEUTRAL
XLOC_005699	ADK	10	74151184	74709303	19.6121	16.9217	-0.21287	0.4749	0.99965	NEUTRAL
XLOC_005703	KAT6B	10	74825581	75032622	5.0026	4.77277	-0.0678505	0.8092	0.99965	NEUTRAL
XLOC_005704	SAMD8	10	75094431	75182123	10.1289	9.42857	-0.103368	0.7359	0.99965	NEUTRAL
XLOC_005707	VDAC2	10	75210153	75231448	84.9113	79.7172	-0.0910652	0.7381	0.99965	NEUTRAL
XLOC_005709	ZNF503-AS2	10	75269818	75411842	1.20853	1.12222	-0.106898	0.9288	0.99965	NEUTRAL
XLOC_005711	C10orf11	10	75430570	76560994	3.87995	2.7995	-0.470871	0.4985	0.99965	NEUTRAL
XLOC_005731	RPS24	10	78033759	78056812	1073.11	1342.49	0.323113	0.2558	0.99965	NEUTRAL
XLOC_005732	LINC00856	10	78238254	78675109	2.53718	3.57445	0.494499	0.48135	0.99965	NEUTRAL
XLOC_005733	LINC00595	10	78238254	78675109	0.486975	0.569043	0.224692	0.84295	0.99965	NEUTRAL
XLOC_005737	ZMIZ1	10	79069034	79316528	24.951	17.9881	-0.472055	0.1102	0.99965	NEUTRAL
XLOC_005738	PPIF	10	79347468	79355337	22.8672	22.9833	0.00730436	0.9805	0.99965	NEUTRAL
XLOC_005739	RP11-342M3.5	10	79382324	79445627	3.29057	2.20641	-0.576632	0.74465	0.99965	NEUTRAL
XLOC_005743	RP11-506M13.3	10	79660890	79827602	1.80323	1.92632	0.0952714	0.9152	0.99965	NEUTRAL
XLOC_005744	RP11-182L21.5	10	79660890	79827602	0.977898	1.3738	0.490415	0.64485	0.99965	NEUTRAL
XLOC_005745	BEND3P3	10	79660890	79827602	1.13303	1.13428	0.00157866	0.98995	0.99965	NEUTRAL
XLOC_005747	RP11-182L21.6	10	79660890	79827602	1.22331	2.07379	0.761476	0.4094	0.99965	NEUTRAL
XLOC_005753	TMEM254	10	80046859	80092557	10.0346	10.5524	0.0725929	0.86325	0.99965	NEUTRAL
XLOC_005755	PLAC9	10	80131681	80145359	7.83325	8.99266	0.199138	0.60785	0.99965	NEUTRAL
XLOC_005756	LINC00857	10	80207709	80219657	1.15655	0.883326	-0.388811	0.4083	0.99965	NEUTRAL
XLOC_005763	TSPAN14	10	80454165	80535942	15.5674	16.5958	0.0922899	0.80205	0.99965	NEUTRAL
XLOC_005774	GHITM	10	84138419	84153555	77.0554	73.5496	-0.0671781	0.794	0.99965	NEUTRAL
XLOC_005779	CCSER2	10	84328585	84518521	12.3103	12.4235	0.0132059	0.97445	0.99965	NEUTRAL
XLOC_005794	BMPR1A	10	86756649	86932838	7.77301	9.02893	0.216081	0.6988	0.99965	NEUTRAL
XLOC_005797	ADIRF,FAM25A	10	86935539	87024732	53.8899	41.6183	-0.372799	0.376	0.99965	NEUTRAL
XLOC_005799	FAM35A	10	87050485	87191468	7.70025	7.38536	-0.0602371	0.9313	0.99965	NEUTRAL
XLOC_005802	NUTM2D	10	87342735	87370695	0.793209	0.899793	0.181891	0.6806	0.99965	NEUTRAL
XLOC_005804	MINPP1	10	87504874	87553460	14.834	12.0974	-0.294203	0.3115	0.99965	NEUTRAL
XLOC_005807	PAPSS2	10	87607984	87747705	59.4372	56.7803	-0.065976	0.79515	0.99965	NEUTRAL
XLOC_005809	PTEN	10	87859160	87971930	41.1843	50.4124	0.291685	0.5502	0.99965	NEUTRAL
XLOC_005820	STAMBPL1	10	88879733	89015785	3.11358	2.44013	-0.351618	0.8363	0.99965	NEUTRAL
XLOC_005822	FAS	10	88879733	89015785	32.3947	30.295	-0.096678	0.8873	0.99965	NEUTRAL
XLOC_005824	RP11-399O19.9	10	89015835	89017059	1.81608	1.78703	-0.0232642	0.96785	0.99965	NEUTRAL
XLOC_005827	IFIT2	10	89213568	89414557	1.03289	0.909833	-0.183012	0.85535	0.99965	NEUTRAL
XLOC_005828	IFIT3	10	89213568	89414557	2.74466	1.97236	-0.476702	0.52815	0.99965	NEUTRAL
XLOC_005831	IFIT1	10	89213568	89414557	0.815302	1.08736	0.415418	0.7638	0.99965	NEUTRAL
XLOC_005832	IFIT5	10	89414585	89421001	3.85759	2.52652	-0.610547	0.0533	0.99965	NEUTRAL
XLOC_005835	KIF20B	10	89701609	89774939	0.581123	0.532478	-0.12612	0.78425	0.99965	NEUTRAL
XLOC_005842	RPP30	10	90871715	90908553	19.3158	12.8277	-0.59052	0.0764	0.99965	NEUTRAL
XLOC_005846	PCGF5	10	91163011	91284331	34.2161	30.125	-0.183714	0.5964	0.99965	NEUTRAL
XLOC_005847	HECTD2	10	91410284	91514829	3.34917	2.84005	-0.237889	0.4351	0.99965	NEUTRAL
XLOC_005849	TNKS2	10	91798311	91865276	14.7755	14.282	-0.0490059	0.85995	0.99965	NEUTRAL
XLOC_005852	BTAF1	10	91923768	92030325	6.6019	9.62979	0.544623	0.05995	0.99965	NEUTRAL
XLOC_005858	MARCH5	10	92291162	92353964	24.2793	26.2252	0.111226	0.78215	0.99965	NEUTRAL
XLOC_005860	MARK2P9	10	92418666	92420875	0.391652	0.542413	0.46982	0.47125	0.99965	NEUTRAL
XLOC_005861	KIF11	10	92593285	92655395	0.59542	0.478318	-0.315937	0.4886	0.99965	NEUTRAL
XLOC_005867	CEP55	10	93496631	93529092	0.370981	0.412028	0.151395	0.80465	0.99965	NEUTRAL
XLOC_005873	SLC35G1	10	93893972	93956062	5.34628	4.97054	-0.105132	0.7429	0.99965	NEUTRAL
XLOC_005875	PLCE1	10	93993988	94332823	1.40764	1.09613	-0.360861	0.36065	0.99965	NEUTRAL
XLOC_005878	TBC1D12	10	94402503	94613905	2.42015	2.34755	-0.0439384	0.89545	0.99965	NEUTRAL
XLOC_005879	HELLS	10	94402503	94613905	0.363864	0.484726	0.41377	0.67595	0.99965	NEUTRAL
XLOC_005888	C10orf131,ENTPD1,RP11-248J23.7	10	95711778	96090238	0.912668	1.10662	0.277995	0.617	0.99965	NEUTRAL
XLOC_005890	CCNJ	10	95711778	96090238	1.27685	1.89427	0.569049	0.2641	0.99965	NEUTRAL
XLOC_005893	ZNF518A	10	96129714	96271587	2.20042	2.7097	0.300352	0.54635	0.99965	NEUTRAL
XLOC_005895	NPM1P26	10	96518108	96587452	0.916077	0.936646	0.0320344	0.94425	0.99965	NEUTRAL
XLOC_005899	LCOR	10	96832259	96981043	3.50488	4.2647	0.283081	0.71755	0.99965	NEUTRAL
XLOC_005900	C10orf12	10	96981283	96986212	1.6962	1.8499	0.125142	0.70735	0.99965	NEUTRAL
XLOC_005901	RP11-175O19.4	10	96992449	96995959	1.60629	1.55508	-0.0467374	0.89965	0.99965	NEUTRAL
XLOC_005905	FRAT1	10	97319266	97321915	0.465074	0.350086	-0.409752	0.6288	0.99965	NEUTRAL
XLOC_005907	RP11-452K12.7	10	97356357	97426076	1.94316	1.73771	-0.161218	0.92665	0.99965	NEUTRAL
XLOC_005908	PGAM1	10	97426159	97433441	317.725	308.469	-0.042653	0.88305	0.99965	NEUTRAL
XLOC_005909	ZDHHC16	10	97446130	97457370	13.0131	13.1863	0.0190711	0.94685	0.99965	NEUTRAL
XLOC_005911	UBTD1	10	97498867	97571209	12.1366	11.8308	-0.0368155	0.90435	0.99965	NEUTRAL
XLOC_005913	HOGA1,PI4K2A,RP11-548K23.11	10	97584322	97676434	12.0956	8.92947	-0.437839	0.1314	0.99965	NEUTRAL
XLOC_005915	MARVELD1	10	97713172	97718152	50.4366	40.1084	-0.330567	0.2663	0.99965	NEUTRAL
XLOC_005916	ZFYVE27	10	97737120	97760907	12.7106	12.0238	-0.0801349	0.79985	0.99965	NEUTRAL
XLOC_005918	R3HCC1L	10	98134623	98244897	4.38058	5.14905	0.233185	0.4604	0.99965	NEUTRAL
XLOC_005919	RP11-34A14.3	10	98247689	98268250	1.26385	2.05426	0.700789	0.64605	0.99965	NEUTRAL
XLOC_005927	CUTC,ENTPD7	10	99659505	99756134	16.4056	16.2201	-0.0164134	0.9684	0.99965	NEUTRAL
XLOC_005929	DNMBP-AS1	10	99875576	100009919	0.819712	0.70787	-0.211633	0.8977	0.99965	NEUTRAL
XLOC_005932	PHBP9	10	100229666	100267680	0.530099	0.407456	-0.379617	0.8483	0.99965	NEUTRAL
XLOC_005934	SCD	10	100347123	100364834	10.657	14.793	0.473105	0.08535	0.99965	NEUTRAL
XLOC_005935	OLMALINC	10	100373614	100383368	0.274653	0.469692	0.774106	0.2225	0.99965	NEUTRAL
XLOC_005938	HIF1AN	10	100486641	100559998	8.0487	10.0786	0.324471	0.61545	0.99965	NEUTRAL
XLOC_005940	FAM178A	10	100911102	100965136	5.45122	5.60421	0.0399335	0.91365	0.99965	NEUTRAL
XLOC_005942	SEMA4G	10	100969457	100994401	0.835038	1.37202	0.71639	0.49925	0.99965	NEUTRAL
XLOC_005944	C10orf2	10	100969457	100994401	3.88588	3.87571	-0.00378119	0.99375	0.99965	NEUTRAL
XLOC_005945	LZTS2	10	100996617	101031157	37.3812	34.2001	-0.128311	0.7019	0.99965	NEUTRAL
XLOC_005946	SFXN3	10	101031233	101041244	19.8698	20.0857	0.0155904	0.967	0.99965	NEUTRAL
XLOC_005947	KAZALD1	10	101061840	101068131	4.16277	4.7379	0.186702	0.64265	0.99965	NEUTRAL
XLOC_005953	BTRC	10	101354032	101557321	4.75121	6.74555	0.505639	0.1675	0.99965	NEUTRAL
XLOC_005954	DPCD	10	101570559	101609668	14.3486	14.5455	0.0196605	0.9665	0.99965	NEUTRAL
XLOC_005958	HPS6	10	102065389	102068038	8.01991	5.98907	-0.421255	0.15755	0.99965	NEUTRAL
XLOC_005960	PPRC1	10	102132993	102150331	9.74412	9.63756	-0.0158637	0.9573	0.99965	NEUTRAL
XLOC_005961	NOLC1	10	102152175	102163871	17.3118	16.4515	-0.0735386	0.7924	0.99965	NEUTRAL
XLOC_005962	ELOVL3	10	102226327	102229589	0.978469	1.45868	0.576069	0.28125	0.99965	NEUTRAL
XLOC_005963	GBF1	10	102245531	102382899	14.0613	15.5933	0.149199	0.58385	0.99965	NEUTRAL
XLOC_005965	NFKB2	10	102394109	102402529	15.8372	14.8231	-0.0954712	0.75385	0.99965	NEUTRAL
XLOC_005966	FBXL15	10	102402616	102423136	3.88091	3.94837	0.0248629	0.95515	0.99965	NEUTRAL
XLOC_005968	RPARP-AS1	10	102449816	102461106	0.534637	0.658599	0.300842	0.5911	0.99965	NEUTRAL
XLOC_005969	TMEM180	10	102461394	102477045	1.27022	1.22881	-0.0478255	0.94215	0.99965	NEUTRAL
XLOC_005970	RP11-18I14.11	10	102479228	102502711	1.22996	2.33268	0.923377	0.7152	0.99965	NEUTRAL
XLOC_005971	SUFU	10	102503986	102633535	4.9282	4.67175	-0.0770983	0.8084	0.99965	NEUTRAL
XLOC_005973	TRIM8	10	102644495	102658407	53.805	49.86	-0.109857	0.73825	0.99965	NEUTRAL
XLOC_005975	WBP1L	10	102743969	102816267	16.4844	15.1036	-0.126204	0.6348	0.99965	NEUTRAL
XLOC_005979	AS3MT,C10orf32,C10orf32-ASMT	10	102854222	102901899	10.3433	12.4201	0.263985	0.4301	0.99965	NEUTRAL
XLOC_005981	CNNM2	10	102918292	103193306	1.3498	1.48717	0.139828	0.9001	0.99965	NEUTRAL
XLOC_005986	INA	10	103277162	103290351	0.829872	0.64299	-0.368092	0.4258	0.99965	NEUTRAL
XLOC_005987	TAF5	10	103367966	103396466	0.929161	0.821576	-0.177534	0.8773	0.99965	NEUTRAL
XLOC_005988	PDCD11	10	103396647	103446292	7.42189	7.81123	0.0737633	0.80785	0.99965	NEUTRAL
XLOC_005989	RP11-225H22.7	10	103446785	103452402	3.37941	3.46789	0.0372882	0.96825	0.99965	NEUTRAL
XLOC_005996	SLK	10	103967200	104029233	9.37784	9.76132	0.0578206	0.8344	0.99965	NEUTRAL
XLOC_005997	SFR1	10	104122057	104126385	1.21023	1.11631	-0.11655	0.8231	0.99965	NEUTRAL
XLOC_005998	GSTO1	10	104235355	104267459	104.583	69.9299	-0.580661	0.03285	0.99965	NEUTRAL
XLOC_005999	GSTO2	10	104268872	104304945	0.834956	0.543454	-0.619541	0.401	0.99965	NEUTRAL
XLOC_006022	ADD3	10	109940103	110135565	33.0026	50.8494	0.623649	0.1124	0.99965	NEUTRAL
XLOC_006023	MXI1	10	110207604	110287365	23.6158	23.4515	-0.0100747	0.97135	0.99965	NEUTRAL
XLOC_006027	DUSP5	10	110497837	110511544	7.59792	5.3838	-0.496979	0.1202	0.99965	NEUTRAL
XLOC_006028	SMC3	10	110567690	110604636	10.7848	10.818	0.00443233	0.98605	0.99965	NEUTRAL
XLOC_006033	PDCD4	10	110869742	110919274	53.7611	61.919	0.20382	0.5692	0.99965	NEUTRAL
XLOC_006034	RP11-348N5.9	10	110869742	110919274	0.408909	0.250532	-0.706782	0.76205	0.99965	NEUTRAL
XLOC_006036	SHOC2	10	110919546	111013667	19.0829	15.6752	-0.283798	0.30365	0.99965	NEUTRAL
XLOC_006042	TECTB	10	112283734	112305035	0.445786	0.308899	-0.529216	0.47555	0.99965	NEUTRAL
XLOC_006044	ACSL5	10	112374017	112446917	0.801766	0.970813	0.276012	0.7896	0.99965	NEUTRAL
XLOC_006045	VTI1A	10	112446997	112818744	5.81033	7.57978	0.383536	0.36205	0.99965	NEUTRAL
XLOC_006047	RP11-57H14.4	10	112823489	112827726	1.81289	1.70411	-0.0892704	0.80365	0.99965	NEUTRAL
XLOC_006050	TCF7L2	10	112950249	113167678	5.43239	4.67562	-0.216429	0.6594	0.99965	NEUTRAL
XLOC_006055	CASP7	10	113679161	113730907	5.90292	5.84356	-0.0145819	0.96435	0.99965	NEUTRAL
XLOC_006058	NHLRC2	10	113854660	113917194	2.73217	2.44704	-0.159013	0.5761	0.99965	NEUTRAL
XLOC_006067	FAM160B1	10	114821743	114899832	18.3688	18.1549	-0.0168963	0.95305	0.99965	NEUTRAL
XLOC_006069	TRUB1	10	114938192	114977676	8.98793	8.13887	-0.14316	0.6393	0.99965	NEUTRAL
XLOC_006086	EMX2	10	117425193	117549546	2.5273	1.69337	-0.577703	0.31525	0.99965	NEUTRAL
XLOC_006088	RP11-354M20.3	10	118004915	118210153	0.940878	1.16299	0.305759	0.89815	0.99965	NEUTRAL
XLOC_006098	FAM45A	10	119104085	119137984	17.5839	19.0516	0.11566	0.72045	0.99965	NEUTRAL
XLOC_006099	GRK5	10	119207588	119459742	2.25599	1.76143	-0.357015	0.3519	0.99965	NEUTRAL
XLOC_006105	BAG3	10	119651369	119677819	32.3589	28.9955	-0.158338	0.55205	0.99965	NEUTRAL
XLOC_006106	INPP5F	10	119726096	119829278	5.50138	4.08311	-0.430125	0.1913	0.99965	NEUTRAL
XLOC_006108	SEC23IP	10	119892710	119944658	26.1319	26.1651	0.00182946	0.99625	0.99965	NEUTRAL
XLOC_006111	PPAPDC1A	10	120456953	120589855	57.507	43.6407	-0.398062	0.15635	0.99965	NEUTRAL
XLOC_006114	WDR11	10	120761811	120909524	13.6747	13.8898	0.0225149	0.93855	0.99965	NEUTRAL
XLOC_006122	RP11-500G22.5	10	121956781	121975217	0.320555	0.401916	0.326322	0.7856	0.99965	NEUTRAL
XLOC_006123	TACC2	10	121989173	122254545	3.67695	2.94479	-0.320344	0.40035	0.99965	NEUTRAL
XLOC_006126	PLEKHA1	10	122374695	122442602	15.306	15.1406	-0.015677	0.9697	0.99965	NEUTRAL
XLOC_006129	HTRA1	10	122461524	122514908	238.31	201.832	-0.239683	0.392	0.99965	NEUTRAL
XLOC_006136	PSTK	10	122930902	123008817	1.21689	1.62848	0.420321	0.70365	0.99965	NEUTRAL
XLOC_006137	ACADSB	10	123008978	123058311	3.52013	2.80355	-0.328371	0.3725	0.99965	NEUTRAL
XLOC_006140	BUB3	10	123154276	123170467	54.9357	57.6572	0.0697581	0.8346	0.99965	NEUTRAL
XLOC_006147	LHPP	10	124461833	124791870	4.72864	4.62183	-0.0329608	0.9662	0.99965	NEUTRAL
XLOC_006148	RP11-12J10.4	10	124461833	124791870	0.622691	0.477364	-0.383427	0.4254	0.99965	NEUTRAL
XLOC_006151	FAM175B	10	124801784	124836670	6.45932	5.70957	-0.178001	0.54565	0.99965	NEUTRAL
XLOC_006153	ZRANB1	10	124917142	125161170	13.2691	14.9448	0.171579	0.8519	0.99965	NEUTRAL
XLOC_006159	EDRF1	10	125683228	125764143	5.23642	5.66763	0.114166	0.7701	0.99965	NEUTRAL
XLOC_006161	BCCIP	10	125823545	125896436	13.8645	15.1743	0.130231	0.77765	0.99965	NEUTRAL
XLOC_006164	FANK1	10	125896538	126009592	2.61672	2.19498	-0.253553	0.6016	0.99965	NEUTRAL
XLOC_006166	DOCK1	10	126905408	127452517	9.39236	9.11338	-0.0435011	0.88245	0.99965	NEUTRAL
XLOC_006170	PTPRE	10	127907060	128085855	4.01229	3.02689	-0.40659	0.20225	0.99965	NEUTRAL
XLOC_006175	MGMT	10	129467183	129768007	15.2515	11.1405	-0.453137	0.15495	0.99965	NEUTRAL
XLOC_006181	GLRX3	10	130136398	130184521	44.649	36.9701	-0.272271	0.4589	0.99965	NEUTRAL
XLOC_006185	PPP2R2D	10	131900643	131959834	13.9174	14.0087	0.00943119	0.9739	0.99965	NEUTRAL
XLOC_006187	RP11-45A17.4	10	131966454	131981931	1.03079	1.628	0.659346	0.60025	0.99965	NEUTRAL
XLOC_006190	DPYSL4	10	132186899	132205776	10.6077	14.2341	0.424231	0.1885	0.99965	NEUTRAL
XLOC_006191	LRRC27	10	132332153	132379918	3.02825	2.958	-0.0338608	0.93795	0.99965	NEUTRAL
XLOC_006192	PWWP2B	10	132397167	132417863	2.468	1.78142	-0.470314	0.2074	0.99965	NEUTRAL
XLOC_006195	INPP5A	10	132537819	132786052	13.3359	10.4852	-0.346958	0.35965	0.99965	NEUTRAL
XLOC_006202	PRAP1,ZNF511	10	133278629	133352683	6.14425	8.7211	0.505272	0.5887	0.99965	NEUTRAL
XLOC_006203	MTG1,PAOX,RP11-108K14.8	10	133379233	133424572	12.0675	13.0508	0.113015	0.7653	0.99965	NEUTRAL
XLOC_006244	DIP2C	10	274189	689743	9.83743	7.91538	-0.313622	0.42125	0.99965	NEUTRAL
XLOC_006248	LARP4B	10	806913	931705	15.2477	13.4692	-0.178922	0.5727	0.99965	NEUTRAL
XLOC_006250	IDI2	10	971145	1049170	1.28114	0.934935	-0.454494	0.21725	0.99965	NEUTRAL
XLOC_006251	IDI1	10	971145	1049170	12.4443	11.4726	-0.117298	0.825	0.99965	NEUTRAL
XLOC_006261	RP11-118K6.3	10	3065423	3066001	0.741873	0.807147	0.12166	0.90705	0.99965	NEUTRAL
XLOC_006262	PITRM1	10	3066332	3172841	30.3725	29.9831	-0.0186168	0.97175	0.99965	NEUTRAL
XLOC_006266	KLF6	10	3775995	3785281	26.0486	18.7254	-0.476213	0.15665	0.99965	NEUTRAL
XLOC_006267	LINC00702	10	4201140	4243912	0.834104	1.15688	0.471939	0.4714	0.99965	NEUTRAL
XLOC_006285	ASB13	10	5638866	5666595	3.18903	2.61627	-0.285606	0.4342	0.99965	NEUTRAL
XLOC_006287	GDI2	10	5765222	5842132	74.1596	65.9549	-0.169153	0.5275	0.99965	NEUTRAL
XLOC_006288	ANKRD16	10	5861616	5889906	1.73197	1.55296	-0.15739	0.78605	0.99965	NEUTRAL
XLOC_006289	IL15RA	10	5890202	5978187	2.03256	2.0326	3.29612e-05	0.99965	0.99965	NEUTRAL
XLOC_006304	KIN	10	7750961	7787981	4.27193	3.50297	-0.286308	0.6415	0.99965	NEUTRAL
XLOC_006316	SFTA1P	10	10784436	10794980	4.23941	6.83251	0.688552	0.13655	0.99965	NEUTRAL
XLOC_006323	USP6NL	10	11453945	11612227	3.58227	2.44857	-0.548935	0.1164	0.99965	NEUTRAL
XLOC_006325	UPF2	10	11920021	12043170	3.57042	3.96018	0.149472	0.61695	0.99965	NEUTRAL
XLOC_006329	NUDT5	10	12129636	12250589	25.3647	26.4358	0.0596691	0.9094	0.99965	NEUTRAL
XLOC_006342	PHYH	10	13277795	13302412	18.3721	14.4851	-0.342941	0.2303	0.99965	NEUTRAL
XLOC_006344	SEPHS1	10	13317423	13348298	20.5389	23.1235	0.171004	0.65695	0.99965	NEUTRAL
XLOC_006345	BEND7	10	13438483	13530262	3.45789	3.87506	0.164328	0.72595	0.99965	NEUTRAL
XLOC_006348	FRMD4A	10	13586926	14462142	11.3108	10.474	-0.110888	0.8373	0.99965	NEUTRAL
XLOC_006350	FAM107B	10	14518556	14774897	19.8007	14.1929	-0.480385	0.0686	0.99965	NEUTRAL
XLOC_006353	CDNF	10	14819249	14871741	0.309222	0.492709	0.672095	0.71345	0.99965	NEUTRAL
XLOC_006355	DCLRE1C	10	14878819	14954432	2.27135	2.12731	-0.0945235	0.8435	0.99965	NEUTRAL
XLOC_006362	C10orf111	10	15095384	15168693	1.07198	0.984495	-0.122826	0.5089	0.99965	NEUTRAL
XLOC_006363	NMT2	10	15095384	15168693	55.0581	48.2197	-0.191331	0.60345	0.99965	NEUTRAL
XLOC_006366	FAM171A1	10	15211642	15371062	23.0105	20.1481	-0.191648	0.48125	0.99965	NEUTRAL
XLOC_006367	ITGA8	10	15513948	15720125	0.729056	0.565496	-0.366513	0.51015	0.99965	NEUTRAL
XLOC_006368	FAM188A	10	15778169	15860520	11.5861	9.11996	-0.345299	0.33515	0.99965	NEUTRAL
XLOC_006372	RSU1	10	16590610	16817528	70.5168	62.3424	-0.177753	0.5807	0.99965	NEUTRAL
XLOC_006376	TRDMT1	10	17142253	17202054	0.873592	1.16299	0.412807	0.55025	0.99965	NEUTRAL
XLOC_006378	RP11-124N14.3	10	17214238	17237593	81.4303	85.049	0.0627278	0.6277	0.99965	NEUTRAL
XLOC_006380	HACD1	10	17589031	17617377	10.2708	10.9652	0.0943923	0.82365	0.99965	NEUTRAL
XLOC_006386	NSUN6	10	18140676	18659285	2.40438	2.40465	0.000162665	0.99945	0.99965	NEUTRAL
XLOC_006405	DNAJC1	10	21756536	22003769	12.4713	13.1272	0.0739471	0.803	0.99965	NEUTRAL
XLOC_006410	PIP4K2A	10	22534848	22714555	10.8821	16.3199	0.584674	0.1281	0.99965	NEUTRAL
XLOC_006417	ARHGAP21	10	24583608	24723668	18.2135	21.8553	0.262978	0.41755	0.99965	NEUTRAL
XLOC_006418	PRTFDC1	10	24848606	24952604	3.36279	2.05939	-0.70744	0.1394	0.99965	NEUTRAL
XLOC_006432	ABI1	10	26697658	26861087	20.963	18.0227	-0.218032	0.48225	0.99965	NEUTRAL
XLOC_006436	ANKRD26	10	26991913	27100498	1.21444	1.29566	0.0933965	0.82295	0.99965	NEUTRAL
XLOC_006438	YME1L1	10	27110111	27186924	60.4236	51.8443	-0.220927	0.53345	0.99965	NEUTRAL
XLOC_006440	ACBD5	10	27195213	27242130	8.38747	9.23181	0.138377	0.6385	0.99965	NEUTRAL
XLOC_006449	MKX	10	27672874	27767794	2.46793	1.91179	-0.368378	0.3861	0.99965	NEUTRAL
XLOC_006451	ARMC4	10	27812163	27999048	0.695972	0.637402	-0.126826	0.84575	0.99965	NEUTRAL
XLOC_006452	MPP7	10	28050992	28334486	0.416524	0.251778	-0.726246	0.2035	0.99965	NEUTRAL
XLOC_006458	WAC-AS1	10	28522651	28623112	3.01659	2.81575	-0.0993967	0.92985	0.99965	NEUTRAL
XLOC_006463	PTCHD3P1	10	29409401	29736781	19.1838	23.4206	0.287884	0.69555	0.99965	NEUTRAL
XLOC_006464	SVIL	10	29409401	29736781	5.5709	7.34019	0.397908	0.5013	0.99965	NEUTRAL
XLOC_006468	KIAA1462	10	30012799	30115494	30.7628	25.1778	-0.289037	0.2841	0.99965	NEUTRAL
XLOC_006471	RP11-305E6.4	10	30302825	30306066	1.36336	0.685105	-0.992766	0.02585	0.99965	NEUTRAL
XLOC_006472	MTPAP	10	30309800	30374448	3.65661	4.06761	0.153678	0.7803	0.99965	NEUTRAL
XLOC_006479	ZNF438	10	30820206	31031937	1.41542	1.55781	0.138291	0.71345	0.99965	NEUTRAL
XLOC_006483	ZEB1-AS1	10	31187882	31529814	1.65401	3.13043	0.920395	0.4253	0.99965	NEUTRAL
XLOC_006488	ARHGAP12	10	31805403	31928876	9.81753	8.08931	-0.279343	0.36145	0.99965	NEUTRAL
XLOC_006490	KIF5B	10	32009009	32056431	41.3917	42.331	0.032372	0.91	0.99965	NEUTRAL
XLOC_006495	EPC1	10	32266288	32378798	5.93461	5.89192	-0.0104164	0.9775	0.99965	NEUTRAL
XLOC_006498	RP11-479G22.8	10	32887254	32889311	9.99941	7.011	-0.512222	0.0951	0.99965	NEUTRAL
XLOC_006499	ITGB1	10	32900318	33082102	949.739	935.151	-0.0223326	0.95025	0.99965	NEUTRAL
XLOC_006506	NRP1	10	33177491	33336262	88.4045	88.9558	0.00896836	0.983	0.99965	NEUTRAL
XLOC_006510	PARD3	10	34109559	34815325	9.28069	9.01998	-0.0411073	0.90655	0.99965	NEUTRAL
XLOC_006515	CUL2	10	35008550	35090642	14.0259	13.2811	-0.0787109	0.7883	0.99965	NEUTRAL
XLOC_006521	RP11-324I22.4	10	35247024	35572669	0.370467	0.594744	0.682922	0.73475	0.99965	NEUTRAL
XLOC_006523	FZD8	10	35638248	35642278	8.93973	5.74627	-0.637607	0.02855	0.99965	NEUTRAL
XLOC_006534	ZNF248	10	37775370	37859110	3.82512	3.02689	-0.337665	0.4534	0.99965	NEUTRAL
XLOC_006537	ZNF25	10	37949571	37976633	7.43506	6.37735	-0.221388	0.4367	0.99965	NEUTRAL
XLOC_006552	ZNF37BP	10	42513509	42552822	1.20081	1.45177	0.273805	0.4522	0.99965	NEUTRAL
XLOC_006553	ZNF33B	10	42574184	42638568	0.78668	1.2018	0.611346	0.4141	0.99965	NEUTRAL
XLOC_006562	HNRNPF	10	43385616	43409166	44.4904	40.2587	-0.144191	0.61215	0.99965	NEUTRAL
XLOC_006564	ZNF239	10	43556343	43574618	1.77889	1.80471	0.0207903	0.9683	0.99965	NEUTRAL
XLOC_006567	ZNF32	10	43628816	43674703	11.1303	9.91842	-0.166313	0.6152	0.99965	NEUTRAL
XLOC_006574	CXCL12	10	44370164	44386493	34.7053	42.7157	0.29961	0.28365	0.99965	NEUTRAL
XLOC_006581	C10orf10	10	44811023	44995891	22.0018	21.1386	-0.0577423	0.838	0.99965	NEUTRAL
XLOC_006582	C10orf25	10	44997697	45181427	0.419904	0.32666	-0.36227	0.7737	0.99965	NEUTRAL
XLOC_006583	CEP164P1,RP11-285G1.15,RSU1P2	10	44997697	45181427	2.57548	1.8398	-0.485293	0.31055	0.99965	NEUTRAL
XLOC_006592	MARCH8	10	45454584	45594906	8.67256	7.02104	-0.304774	0.46115	0.99965	NEUTRAL
XLOC_006593	ZFAND4	10	45615500	45672780	1.99694	2.07163	0.0529703	0.91405	0.99965	NEUTRAL
XLOC_006598	AGAP4	10	45825593	45853875	1.43178	1.43549	0.00372548	0.996	0.99965	NEUTRAL
XLOC_006599	PARGP1	10	45854092	45972154	1.4445	2.55262	0.821406	0.16935	0.99965	NEUTRAL
XLOC_006600	NCOA4	10	46005087	46030714	59.0802	49.6517	-0.25083	0.3481	0.99965	NEUTRAL
XLOC_006605	RP11-38L15.3	10	46578216	46652025	5.40832	4.31653	-0.325309	0.5544	0.99965	NEUTRAL
XLOC_006606	FAM35BP,RHEBP1	10	46578216	46652025	0.480729	0.349817	-0.458625	0.6625	0.99965	NEUTRAL
XLOC_006615	AGAP9	10	47496211	47553514	2.41346	2.84752	0.238602	0.5055	0.99965	NEUTRAL
XLOC_006629	ARHGAP22	10	48446033	48656265	56.1236	47.4876	-0.241055	0.5334	0.99965	NEUTRAL
XLOC_006638	VSTM4	10	48684875	49115509	5.17688	3.97579	-0.380842	0.17165	0.99965	NEUTRAL
XLOC_006643	ERCC6,ERCC6-PGBD3,PGBD3	10	49419276	49539538	13.9678	13.9278	-0.00413932	0.98855	0.99965	NEUTRAL
XLOC_006645	PARG	10	49818278	49982053	6.18113	5.64113	-0.131886	0.73545	0.99965	NEUTRAL
XLOC_006649	ASAH2	10	50182777	50248610	0.49689	0.32728	-0.602403	0.2638	0.99965	NEUTRAL
XLOC_006650	SGMS1	10	50305585	50641451	7.37416	6.94651	-0.0861904	0.8048	0.99965	NEUTRAL
XLOC_006663	CSTF2T	10	50991357	52314128	4.00227	4.36814	0.1262	0.72835	0.99965	NEUTRAL
XLOC_006664	PRKG1-AS1	10	50991357	52314128	0.363152	0.524982	0.531693	0.7948	0.99965	NEUTRAL
XLOC_006678	ZWINT	10	56357227	56361275	0.945517	0.742882	-0.347972	0.5431	0.99965	NEUTRAL
XLOC_006682	IPMK	10	58191516	58267934	2.99333	2.20167	-0.443154	0.13975	0.99965	NEUTRAL
XLOC_006688	FAM13C	10	59176589	59363181	1.21131	1.27291	0.0715635	0.87	0.99965	NEUTRAL
XLOC_006691	SLC16A9	10	59650760	59736002	2.84836	2.32479	-0.293033	0.37995	0.99965	NEUTRAL
XLOC_006693	CCDC6	10	59788762	59906656	13.8377	11.7292	-0.238495	0.3772	0.99965	NEUTRAL
XLOC_006695	ANK3	10	60026297	60733490	1.86667	0.945351	-0.981544	0.13095	0.99965	NEUTRAL
XLOC_006696	RHOBTB1	10	60869437	61001440	7.00488	7.08573	0.0165574	0.96125	0.99965	NEUTRAL
XLOC_006705	EGR2	10	62811995	62919900	0.672686	0.840955	0.322095	0.49105	0.99965	NEUTRAL
XLOC_006707	JMJD1C	10	63167220	63466563	7.50932	7.60567	0.018393	0.9631	0.99965	NEUTRAL
XLOC_006724	HERC4	10	67921898	68075348	42.4914	28.7171	-0.565259	0.0503	0.99965	NEUTRAL
XLOC_006725	RP11-474D14.2	10	67921898	68075348	1.38986	1.62788	0.228048	0.7339	0.99965	NEUTRAL
XLOC_006730	PBLD	10	68282659	68407294	2.06652	2.2375	0.114678	0.9285	0.99965	NEUTRAL
XLOC_006731	RUFY2	10	68282659	68407294	6.06493	4.94544	-0.294394	0.6267	0.99965	NEUTRAL
XLOC_006732	DNA2	10	68414063	68472121	0.681755	0.595339	-0.195543	0.6927	0.99965	NEUTRAL
XLOC_006733	SLC25A16	10	68477998	68527474	1.5977	2.50159	0.646848	0.2294	0.99965	NEUTRAL
XLOC_006743	TACR2	10	69403902	69416867	0.554882	0.387333	-0.518605	0.4188	0.99965	NEUTRAL
XLOC_006754	AIFM2	10	70052795	70132934	5.96062	5.97325	0.00305225	0.99285	0.99965	NEUTRAL
XLOC_006755	TYSND1	10	70137980	70146676	1.95827	1.68457	-0.217197	0.5541	0.99965	NEUTRAL
XLOC_006756	SAR1A	10	70147288	70170523	45.355	57.2856	0.336911	0.31515	0.99965	NEUTRAL
XLOC_006758	PPA1	10	70202829	70233911	47.7154	52.0712	0.126031	0.6464	0.99965	NEUTRAL
XLOC_006760	LRRC20	10	70298969	70382650	0.87934	0.697073	-0.335111	0.46815	0.99965	NEUTRAL
XLOC_006766	PCBD1	10	70882279	70888784	22.8971	21.0349	-0.122378	0.67585	0.99965	NEUTRAL
XLOC_006770	C10orf54	10	71396933	71815947	107.639	103.883	-0.0512478	0.89905	0.99965	NEUTRAL
XLOC_006771	PSAP	10	71816297	71851369	466.446	439.133	-0.0870521	0.76895	0.99965	NEUTRAL
XLOC_006776	ASCC1	10	72096031	72235860	8.80381	7.98523	-0.140793	0.7849	0.99965	NEUTRAL
XLOC_006777	RP11-442H21.2	10	72273919	72276036	43.0899	47.4869	0.140179	0.7283	0.99965	NEUTRAL
XLOC_006778	DNAJB12	10	72332829	72355230	12.5228	11.9582	-0.0665558	0.81925	0.99965	NEUTRAL
XLOC_006779	MICU1	10	72367326	72626191	23.2617	21.2351	-0.131502	0.62585	0.99965	NEUTRAL
XLOC_006785	RPL17P50	10	73005832	73006595	2.2981	2.09594	-0.132849	0.83135	0.99965	NEUTRAL
XLOC_006786	P4HA1	10	73007216	73096974	122.593	165.071	0.429212	0.12535	0.99965	NEUTRAL
XLOC_006791	ECD	10	73110374	73358859	10.8755	9.00979	-0.271515	0.6196	0.99965	NEUTRAL
XLOC_006792	DNAJC9,MRPS16	10	73110374	73358859	18.0336	21.9705	0.284886	0.57485	0.99965	NEUTRAL
XLOC_006795	ANXA7	10	73375100	73414076	62.741	55.8985	-0.166598	0.58615	0.99965	NEUTRAL
XLOC_006797	MSS51	10	73423578	73433561	0.484153	0.733605	0.599541	0.2802	0.99965	NEUTRAL
XLOC_006798	PPP3CB	10	73436427	73625953	19.2148	16.0519	-0.25947	0.37795	0.99965	NEUTRAL
XLOC_006799	USP54	10	73436427	73625953	1.63843	1.85463	0.17881	0.8266	0.99965	NEUTRAL
XLOC_006803	AGAP5	10	73644880	73730487	3.07303	3.87394	0.334138	0.45015	0.99965	NEUTRAL
XLOC_006804	RP11-574K11.27	10	73740537	73740823	0.720522	0.520962	-0.467864	0.7622	0.99965	NEUTRAL
XLOC_006805	RP11-574K11.24	10	73742994	73744230	2.28545	4.07082	0.832841	0.05715	0.99965	NEUTRAL
XLOC_006806	RP11-574K11.32	10	73744383	73780251	8.78999	8.41605	-0.0627183	0.8981	0.99965	NEUTRAL
XLOC_006807	NDST2,RP11-574K11.31	10	73785581	73811798	8.07528	8.1762	0.017918	0.97625	0.99965	NEUTRAL
XLOC_006808	CAMK2G	10	73812500	73874591	10.7446	12.0227	0.162158	0.59625	0.99965	NEUTRAL
XLOC_006810	AP3M1	10	73995192	74151063	14.024	12.223	-0.198298	0.81375	0.99965	NEUTRAL
XLOC_006822	COMTD1	10	75233968	75236030	1.69123	1.96296	0.214957	0.72765	0.99965	NEUTRAL
XLOC_006825	ZNF503	10	75269818	75411842	12.1719	9.17675	-0.407503	0.1443	0.99965	NEUTRAL
XLOC_006838	KCNMA1	10	76869600	77638595	32.0134	30.4489	-0.0722885	0.85455	0.99965	NEUTRAL
XLOC_006841	RP13-39P12.2	10	77780336	77781876	0.254259	0.44329	0.801952	0.30695	0.99965	NEUTRAL
XLOC_006842	DLG5	10	77782865	77926526	12.1159	11.7162	-0.0483914	0.86145	0.99965	NEUTRAL
XLOC_006844	POLR3A	10	77969250	78029545	6.1969	5.24219	-0.241376	0.3846	0.99965	NEUTRAL
XLOC_006847	ZMIZ1-AS1	10	78943327	79067895	1.01791	1.01197	-0.00844415	0.98385	0.99965	NEUTRAL
XLOC_006849	ZCCHC24	10	79382324	79445627	11.0952	8.90229	-0.317683	0.2502	0.99965	NEUTRAL
XLOC_006858	NUTM2B-AS1	10	79660890	79827602	8.16659	7.52116	-0.118777	0.8367	0.99965	NEUTRAL
XLOC_006859	RP11-119F19.5	10	79660890	79827602	0.602804	0.485471	-0.312304	0.8242	0.99965	NEUTRAL
XLOC_006871	RP11-369J21.12	10	80046859	80092557	11.4029	11.3118	-0.0115731	0.98825	0.99965	NEUTRAL
XLOC_006872	ANXA11	10	80150888	80205572	49.3572	41.6885	-0.243612	0.38875	0.99965	NEUTRAL
XLOC_006904	WAPAL	10	86435255	86521815	12.4928	14.3999	0.204963	0.5486	0.99965	NEUTRAL
XLOC_006908	MMRN2	10	86935539	87024732	6.09991	6.01709	-0.0197199	0.9801	0.99965	NEUTRAL
XLOC_006911	GLUD1	10	87050485	87191468	28.0833	24.1783	-0.215998	0.473	0.99965	NEUTRAL
XLOC_006913	NUTM2A-AS1	10	87203874	87342612	14.6134	16.8673	0.206935	0.55555	0.99965	NEUTRAL
XLOC_006919	ATAD1	10	87751511	87845612	19.4444	17.2456	-0.173124	0.533	0.99965	NEUTRAL
XLOC_006921	KLLN	10	87859160	87971930	0.286815	0.397076	0.469294	0.27075	0.99965	NEUTRAL
XLOC_006925	RNLS	10	88273863	88584530	4.12924	6.88543	0.737669	0.10875	0.99965	NEUTRAL
XLOC_006932	CH25H	10	89205628	89207314	0.545864	0.334167	-0.707974	0.3155	0.99965	NEUTRAL
XLOC_006933	LIPA	10	89213568	89414557	11.6762	9.09232	-0.36085	0.2696	0.99965	NEUTRAL
XLOC_006936	PANK1	10	89579496	89650822	1.79985	1.43961	-0.322199	0.52635	0.99965	NEUTRAL
XLOC_006945	HTR7	10	90740822	90857698	1.98256	1.19433	-0.731163	0.06095	0.99965	NEUTRAL
XLOC_006947	ANKRD1	10	90912095	90921276	40.5381	42.8745	0.0808399	0.7683	0.99965	NEUTRAL
XLOC_006952	PPP1R3C	10	91628441	91633054	37.0952	43.7906	0.239389	0.37125	0.99965	NEUTRAL
XLOC_006962	IDE	10	92451683	92574076	8.87122	8.47433	-0.0660329	0.87115	0.99965	NEUTRAL
XLOC_006971	MYOF	10	93306428	93482317	37.9329	38.2713	0.0128134	0.9677	0.99965	NEUTRAL
XLOC_006974	FRA10AC1	10	93667882	93702572	6.62023	5.65838	-0.22649	0.6001	0.99965	NEUTRAL
XLOC_006981	PLCE1-AS1	10	93993988	94332823	1.30119	1.48902	0.19453	0.8621	0.99965	NEUTRAL
XLOC_006983	NOC3L	10	94333225	94362959	6.68192	7.08947	0.0854143	0.78345	0.99965	NEUTRAL
XLOC_006993	PDLIM1	10	95237571	95291024	79.334	84.1038	0.0842301	0.75565	0.99965	NEUTRAL
XLOC_006995	ALDH18A1	10	95605928	95656706	36.7454	36.9314	0.00728707	0.9753	0.99965	NEUTRAL
XLOC_006996	TCTN3	10	95663395	95694143	16.9793	14.832	-0.195065	0.48375	0.99965	NEUTRAL
XLOC_006997	ENTPD1-AS1	10	95711778	96090238	2.16352	1.86587	-0.213532	0.8115	0.99965	NEUTRAL
XLOC_007004	TLL2	10	96364605	96513918	0.427047	0.597672	0.48496	0.43425	0.99965	NEUTRAL
XLOC_007005	TM9SF3	10	96518108	96587452	95.0833	84.8832	-0.163714	0.73395	0.99965	NEUTRAL
XLOC_007010	ARHGAP19,ARHGAP19-SLIT1,SLIT1	10	96998037	97292673	0.965839	0.805292	-0.262269	0.51545	0.99965	NEUTRAL
XLOC_007013	RRP12	10	97356357	97426076	9.16837	10.3151	0.170018	0.61795	0.99965	NEUTRAL
XLOC_007016	EXOSC1	10	97436141	97446017	13.2025	10.8239	-0.286589	0.4085	0.99965	NEUTRAL
XLOC_007017	MMS19	10	97458323	97498794	17.023	17.6324	0.0507417	0.86155	0.99965	NEUTRAL
XLOC_007018	MORN4	10	97584322	97676434	6.30432	5.21506	-0.273657	0.74195	0.99965	NEUTRAL
XLOC_007019	AVPI1	10	97677423	97687323	17.0481	11.9462	-0.513055	0.0835	0.99965	NEUTRAL
XLOC_007025	LOXL4	10	98247689	98268250	38.6732	32.1793	-0.265198	0.33035	0.99965	NEUTRAL
XLOC_007026	PYROXD2	10	98383564	98415184	2.85407	3.29964	0.209287	0.659	0.99965	NEUTRAL
XLOC_007027	HPS1	10	98416197	98446947	29.1294	28.7745	-0.0176842	0.95375	0.99965	NEUTRAL
XLOC_007032	GOT1	10	99396869	99430624	11.1553	9.17608	-0.281772	0.38825	0.99965	NEUTRAL
XLOC_007034	SLC25A28	10	99610521	99620609	19.8159	18.8859	-0.0693449	0.8306	0.99965	NEUTRAL
XLOC_007037	COX15	10	99659505	99756134	6.53532	5.08764	-0.361262	0.5031	0.99965	NEUTRAL
XLOC_007039	DNMBP	10	99875576	100009919	11.4586	9.67479	-0.244122	0.3872	0.99965	NEUTRAL
XLOC_007043	CHUK,ERLIN1	10	100150093	100229619	30.7472	25.5712	-0.265937	0.42035	0.99965	NEUTRAL
XLOC_007044	CWF19L1	10	100229666	100267680	7.80069	5.94619	-0.391636	0.3121	0.99965	NEUTRAL
XLOC_007046	BLOC1S2	10	100273279	100286712	35.6834	32.5412	-0.132986	0.6381	0.99965	NEUTRAL
XLOC_007050	NDUFB8,RP11-411B6.6,SEC31B	10	100486641	100559998	67.2203	66.7811	-0.00945665	0.98175	0.99965	NEUTRAL
XLOC_007054	MRPL43	10	100969457	100994401	25.6164	24.8808	-0.0420323	0.90405	0.99965	NEUTRAL
XLOC_007064	POLL	10	101570559	101609668	6.60413	7.90583	0.259548	0.5359	0.99965	NEUTRAL
XLOC_007065	FBXW4	10	101610663	101695295	15.5766	16.2729	0.063091	0.86025	0.99965	NEUTRAL
XLOC_007068	NPM3	10	101781324	101783413	12.0178	12.1495	0.0157278	0.967	0.99965	NEUTRAL
XLOC_007069	MGEA5	10	101784442	101818465	55.9268	49.7818	-0.167924	0.60475	0.99965	NEUTRAL
XLOC_007070	KCNIP2	10	101819077	101843920	0.457143	0.525021	0.199731	0.78995	0.99965	NEUTRAL
XLOC_007071	C10orf76	10	101845598	102056193	5.59589	4.32729	-0.370901	0.30465	0.99965	NEUTRAL
XLOC_007076	LDB1	10	102107559	102120453	21.9708	28.712	0.386066	0.1716	0.99965	NEUTRAL
XLOC_007078	PSD	10	102402616	102423136	0.77345	0.79265	0.0353765	0.9774	0.99965	NEUTRAL
XLOC_007079	CUEDC2	10	102423244	102432661	35.1847	26.8461	-0.390237	0.1953	0.99965	NEUTRAL
XLOC_007081	ACTR1A	10	102479228	102502711	50.9119	44.8436	-0.1831	0.5437	0.99965	NEUTRAL
XLOC_007083	RP11-47A8.5	10	102642791	102644140	2.7316	2.19979	-0.312378	0.47775	0.99965	NEUTRAL
XLOC_007084	ARL3	10	102673730	102714407	6.69657	6.94191	0.0519109	0.85885	0.99965	NEUTRAL
XLOC_007088	NT5C2	10	102918292	103193306	39.8825	39.3424	-0.0196712	0.9494	0.99965	NEUTRAL
XLOC_007091	PCGF6	10	103302795	103351134	3.68147	2.8105	-0.389456	0.2688	0.99965	NEUTRAL
XLOC_007093	USMG5	10	103367966	103396466	201.284	176.515	-0.189444	0.51115	0.99965	NEUTRAL
XLOC_007094	CALHM2	10	103446785	103452402	9.4828	8.90726	-0.0903314	0.78415	0.99965	NEUTRAL
XLOC_007098	SH3PXD2A	10	103594026	103855543	16.4989	16.1606	-0.0298902	0.9078	0.99965	NEUTRAL
XLOC_007099	RP11-541N10.3	10	103877373	103879761	0.609253	0.671982	0.141381	0.7881	0.99965	NEUTRAL
XLOC_007100	OBFC1	10	103882541	103918205	10.8963	9.96607	-0.128742	0.68125	0.99965	NEUTRAL
XLOC_007106	ITPRIP	10	104309697	104338404	23.1214	14.1848	-0.704887	0.0108	0.99965	NEUTRAL
XLOC_007118	XPNPEP1	10	109864765	109923553	26.7093	29.2986	0.133487	0.63635	0.99965	NEUTRAL
XLOC_007119	ADD3-AS1	10	109940103	110135565	0.40569	0.33761	-0.265023	0.8816	0.99965	NEUTRAL
XLOC_007121	RP11-549L6.3	10	110207604	110287365	0.574519	0.325333	-0.820436	0.733	0.99965	NEUTRAL
XLOC_007122	SMNDC1	10	110290729	110304951	14.4501	12.8775	-0.166234	0.66335	0.99965	NEUTRAL
XLOC_007127	BBIP1	10	110869742	110919274	6.88713	8.75118	0.345574	0.6421	0.99965	NEUTRAL
XLOC_007131	GPAM	10	112149863	112215377	17.097	17.14	0.00362023	0.9898	0.99965	NEUTRAL
XLOC_007133	ZDHHC6	10	112374017	112446917	14.7323	17.606	0.25708	0.40625	0.99965	NEUTRAL
XLOC_007136	RP11-57H14.2	10	112950249	113167678	0.742539	0.784038	0.0784576	0.2677	0.99965	NEUTRAL
XLOC_007140	DCLRE1A	10	113834724	113854383	1.81394	1.36956	-0.405421	0.2534	0.99965	NEUTRAL
XLOC_007141	CCDC186	10	114120861	114174220	2.6029	4.04861	0.637304	0.13345	0.99965	NEUTRAL
XLOC_007147	ABLIM1	10	114431112	114685003	0.869658	0.875409	0.00950817	0.9848	0.99965	NEUTRAL
XLOC_007153	GFRA1	10	116056924	116273467	5.08811	3.1928	-0.67231	0.0518	0.99965	NEUTRAL
XLOC_007156	HSPA12A	10	116663695	116742574	2.0111	2.09964	0.0621527	0.8574	0.99965	NEUTRAL
XLOC_007159	KIAA1598	10	116828760	117126586	1.24143	1.56774	0.336685	0.4488	0.99965	NEUTRAL
XLOC_007166	RP11-129M16.4	10	117239599	117375467	2.04652	1.95186	-0.0683242	0.95595	0.99965	NEUTRAL
XLOC_007167	PDZD8	10	117239599	117375467	12.1983	10.7416	-0.183483	0.65405	0.99965	NEUTRAL
XLOC_007168	EMX2OS	10	117425193	117549546	1.59495	2.69677	0.757724	0.37565	0.99965	NEUTRAL
XLOC_007171	RAB11FIP2	10	118004915	118210153	5.39629	4.6431	-0.21688	0.48545	0.99965	NEUTRAL
XLOC_007172	FAM204A	10	118297929	118342328	18.0394	13.7192	-0.394956	0.3186	0.99965	NEUTRAL
XLOC_007175	CACUL1	10	118674166	118755249	8.59397	7.33343	-0.228837	0.54405	0.99965	NEUTRAL
XLOC_007180	EIF3A	10	119029715	119080823	51.8136	58.5636	0.176674	0.52125	0.99965	NEUTRAL
XLOC_007183	SFXN4	10	119140766	119165667	4.47673	4.5358	0.0189117	0.9619	0.99965	NEUTRAL
XLOC_007184	PRDX3	10	119167702	119178833	66.2547	56.7726	-0.222829	0.41815	0.99965	NEUTRAL
XLOC_007186	RGS10	10	119499827	119542708	15.6135	16.8438	0.109427	0.73305	0.99965	NEUTRAL
XLOC_007188	TIAL1	10	119571801	119597029	29.3062	30.3265	0.0493745	0.875	0.99965	NEUTRAL
XLOC_007191	MCMBP	10	119829403	119892556	18.0964	18.0827	-0.0010939	0.9963	0.99965	NEUTRAL
XLOC_007199	RP11-95I16.4	10	120761811	120909524	0.951349	0.944228	-0.0108384	0.69565	0.99965	NEUTRAL
XLOC_007203	FGFR2	10	121478333	121598458	3.07141	5.66586	0.883396	0.0032	0.814483	NEUTRAL
XLOC_007205	ATE1	10	121740420	121951965	4.71267	4.91149	0.0596186	0.8592	0.99965	NEUTRAL
XLOC_007207	NSMCE4A	10	121956781	121975217	6.23778	5.84859	-0.0929453	0.82015	0.99965	NEUTRAL
XLOC_007209	CUZD1,FAM24B	10	122832148	122879641	4.21128	4.19671	-0.00500159	0.99095	0.99965	NEUTRAL
XLOC_007210	C10orf88	10	122930902	123008817	6.83101	5.2837	-0.37055	0.493	0.99965	NEUTRAL
XLOC_007211	IKZF5	10	122930902	123008817	4.58206	3.03418	-0.594693	0.1971	0.99965	NEUTRAL
XLOC_007220	CHST15	10	124007665	124093607	10.7532	10.5432	-0.0284556	0.93	0.99965	NEUTRAL
XLOC_007221	OAT	10	124397302	124418976	72.5604	62.793	-0.208579	0.43305	0.99965	NEUTRAL
XLOC_007224	FAM53B,METTL10,RP11-12J10.3	10	124461833	124791870	9.23651	8.06863	-0.195024	0.64285	0.99965	NEUTRAL
XLOC_007227	CTBP2	10	124917142	125161170	16.8551	16.5451	-0.0267796	0.94775	0.99965	NEUTRAL
XLOC_007232	EDRF1-AS1,FLJ37035,RP11-383C5.8	10	125683228	125764143	1.19687	2.09759	0.809471	0.36535	0.99965	NEUTRAL
XLOC_007235	UROS	10	125784979	125823248	33.044	28.5577	-0.21051	0.4733	0.99965	NEUTRAL
XLOC_007236	DHX32	10	125823545	125896436	12.4806	11.9771	-0.0594132	0.87225	0.99965	NEUTRAL
XLOC_007240	ADAM12	10	126012380	126388455	60.1315	73.0865	0.281483	0.5032	0.99965	NEUTRAL
XLOC_007244	C10orf90	10	126424996	126670446	0.539784	0.634566	0.233389	0.70475	0.99965	NEUTRAL
XLOC_007257	EBF3	10	129835282	129963841	5.14569	3.91818	-0.393179	0.19735	0.99965	NEUTRAL
XLOC_007268	BNIP3	10	131966454	131981931	47.6235	48.9209	0.0387769	0.88305	0.99965	NEUTRAL
XLOC_007270	STK32C	10	132207491	132331847	3.68068	3.81422	0.0514137	0.91625	0.99965	NEUTRAL
XLOC_007274	NKX6-2	10	132537819	132786052	2.11854	2.24052	0.0807679	0.95965	0.99965	NEUTRAL
XLOC_007283	TUBGCP2	10	133278629	133352683	17.0815	15.0512	-0.182554	0.6609	0.99965	NEUTRAL
XLOC_007284	RP11-122K13.12	10	133278629	133352683	0.949247	1.30461	0.458768	0.53675	0.99965	NEUTRAL
XLOC_007288	FUOM	10	133355153	133358035	7.26343	6.56249	-0.146408	0.72085	0.99965	NEUTRAL
XLOC_007289	ECHS1	10	133362479	133373689	46.5583	43.2065	-0.10779	0.68665	0.99965	NEUTRAL
XLOC_007292	SPRN	10	133379233	133424572	1.43011	1.8467	0.36882	0.5465	0.99965	NEUTRAL
XLOC_007307	RP11-304M2.5	11	127203	207428	18.1935	23.5496	0.372276	0.6208	0.99965	NEUTRAL
XLOC_007308	RIC8A	11	207510	215113	44.5012	44.6326	0.00425143	0.9904	0.99965	NEUTRAL
XLOC_007309	PSMD13	11	215457	252984	47.7189	44.1617	-0.111765	0.72575	0.99965	NEUTRAL
XLOC_007312	ATHL1	11	289134	296107	10.5928	11.9474	0.173607	0.65185	0.99965	NEUTRAL
XLOC_007313	IFITM1,IFITM2	11	307630	315272	182.534	188.89	0.0493847	0.8575	0.99965	NEUTRAL
XLOC_007318	B4GALNT4	11	369795	382116	2.53699	4.72783	0.898059	0.1812	0.99965	NEUTRAL
XLOC_007319	PKP3	11	392613	404908	0.376391	0.411175	0.127522	0.85915	0.99965	NEUTRAL
XLOC_007320	PTDSS2	11	448267	491399	14.2061	15.727	0.146736	0.68275	0.99965	NEUTRAL
XLOC_007323	RP11-496I9.1	11	537526	564021	0.360362	0.573608	0.670618	0.66395	0.99965	NEUTRAL
XLOC_007325	PHRF1	11	576485	612222	8.76076	7.88956	-0.151111	0.57625	0.99965	NEUTRAL
XLOC_007328	EPS8L2	11	644232	727727	18.2786	21.5699	0.238866	0.56615	0.99965	NEUTRAL
XLOC_007329	TMEM80	11	644232	727727	3.35343	3.52001	0.0699404	0.94905	0.99965	NEUTRAL
XLOC_007330	TALDO1	11	747328	765024	137.06	98.3947	-0.478158	0.0839	0.99965	NEUTRAL
XLOC_007331	AP006621.5	11	777577	784297	0.685726	0.448879	-0.611308	0.5479	0.99965	NEUTRAL
XLOC_007332	CMB9-55F22.1	11	777577	784297	0.403919	0.381364	-0.0829001	0.93005	0.99965	NEUTRAL
XLOC_007334	PANO1	11	790474	812880	0.605715	0.916985	0.598259	0.8218	0.99965	NEUTRAL
XLOC_007335	RPLP2	11	790474	812880	925.276	965.969	0.0620928	0.84195	0.99965	NEUTRAL
XLOC_007336	PNPLA2	11	818901	842545	48.0437	45.8236	-0.0682585	0.9502	0.99965	NEUTRAL
XLOC_007338	CD151	11	818901	842545	437.011	474.394	0.118417	0.73245	0.99965	NEUTRAL
XLOC_007339	TSPAN4	11	842807	867116	103.044	90.8974	-0.180945	0.576	0.99965	NEUTRAL
XLOC_007340	AP2A2	11	924893	1012245	19.5512	15.5698	-0.328505	0.2632	0.99965	NEUTRAL
XLOC_007347	TOLLIP-AS1	11	1309768	1310707	0.508418	0.435204	-0.224323	0.7761	0.99965	NEUTRAL
XLOC_007348	BRSK2	11	1389898	1462689	0.386519	0.212158	-0.865399	0.2475	0.99965	NEUTRAL
XLOC_007355	AC068580.6	11	1732409	1764025	3.02311	3.77721	0.321288	0.6741	0.99965	NEUTRAL
XLOC_007360	LSP1	11	1852969	1892267	0.497742	0.425422	-0.226502	0.76965	0.99965	NEUTRAL
XLOC_007363	MRPL23	11	1947277	1989920	2.02365	3.11584	0.622666	0.23985	0.99965	NEUTRAL
XLOC_007373	CD81	11	2328748	2397419	415.894	409.556	-0.022158	0.9394	0.99965	NEUTRAL
XLOC_007374	TSSC4	11	2400487	2403878	12.4711	15.0267	0.26894	0.37215	0.99965	NEUTRAL
XLOC_007384	SLC22A18	11	2887779	2925246	9.48444	9.81127	0.0488762	0.89145	0.99965	NEUTRAL
XLOC_007394	TSSC2	11	3380960	3408978	0.425235	0.418063	-0.0245385	0.97475	0.99965	NEUTRAL
XLOC_007402	PGAP2	11	3665586	3826371	6.7165	7.77667	0.211442	0.80785	0.99965	NEUTRAL
XLOC_007403	STIM1	11	3854317	4093210	28.9216	34.8154	0.267577	0.52185	0.99965	NEUTRAL
XLOC_007407	RRM1	11	4094706	4138876	24.6943	22.1004	-0.160102	0.58905	0.99965	NEUTRAL
XLOC_007453	TRIM34,TRIM6,TRIM6-TRIM34	11	5248082	5645789	5.38541	5.75972	0.096943	0.7713	0.99965	NEUTRAL
XLOC_007454	OR56B1,TRIM22	11	5663556	5938619	45.7356	50.2401	0.135521	0.6932	0.99965	NEUTRAL
XLOC_007475	SMPD1	11	6390430	6394998	79.3074	68.7466	-0.206167	0.45205	0.99965	NEUTRAL
XLOC_007476	DNHD1,TIMM10B	11	6474682	6593758	13.1337	15.4283	0.232301	0.6147	0.99965	NEUTRAL
XLOC_007477	ILK	11	6595074	6612667	25.2167	25.7547	0.0304598	0.96135	0.99965	NEUTRAL
XLOC_007487	ZNF215	11	6926403	6984632	1.35556	1.38433	0.0302938	0.93875	0.99965	NEUTRAL
XLOC_007494	PPFIBP2	11	7513297	7657127	5.64676	4.63929	-0.283518	0.675	0.99965	NEUTRAL
XLOC_007500	EIF3F	11	7970250	8001862	157.383	160.942	0.0322576	0.906	0.99965	NEUTRAL
XLOC_007502	TUB	11	8019243	8169055	5.61582	6.15166	0.13148	0.63395	0.99965	NEUTRAL
XLOC_007507	RPL27A	11	8682410	8910951	949.557	975.934	0.0395291	0.89765	0.99965	NEUTRAL
XLOC_007508	RP11-152H18.3	11	8682410	8910951	5.51496	6.60572	0.260364	0.832	0.99965	NEUTRAL
XLOC_007511	AKIP1	11	8911138	8933006	13.7556	13.899	0.014967	0.9623	0.99965	NEUTRAL
XLOC_007515	IPO7	11	9384621	9448126	44.3169	41.5476	-0.0930924	0.7338	0.99965	NEUTRAL
XLOC_007516	SNORA23	11	9384621	9448126	1.47262	0.985361	-0.579663	0.6546	0.99965	NEUTRAL
XLOC_007518	ZNF143	11	9459555	9528524	8.0827	7.0085	-0.205732	0.61005	0.99965	NEUTRAL
XLOC_007520	WEE1	11	9573680	9593457	12.1649	11.5288	-0.0774798	0.85315	0.99965	NEUTRAL
XLOC_007523	SWAP70	11	9664076	9752991	14.0809	14.2364	0.0158522	0.95215	0.99965	NEUTRAL
XLOC_007525	SBF2-AS1	11	9754769	10294207	0.753811	1.35489	0.845897	0.54995	0.99965	NEUTRAL
XLOC_007528	ADM	11	10304679	10307397	119.8	92.225	-0.377393	0.22625	0.99965	NEUTRAL
XLOC_007529	AMPD3	11	10308312	10507579	7.03524	4.65026	-0.597287	0.062	0.99965	NEUTRAL
XLOC_007532	CTR9	11	10750986	10779743	9.94397	11.256	0.178795	0.5773	0.99965	NEUTRAL
XLOC_007535	ZBED5-AS1	11	10809296	10906802	2.09453	1.67489	-0.322561	0.7948	0.99965	NEUTRAL
XLOC_007541	USP47	11	11841422	11959323	24.5944	21.8125	-0.173176	0.58645	0.99965	NEUTRAL
XLOC_007545	MICAL2	11	12094007	12263789	94.178	91.2745	-0.0451786	0.88935	0.99965	NEUTRAL
XLOC_007550	PARVA	11	12377184	12530801	73.998	74.1114	0.00220878	0.99395	0.99965	NEUTRAL
XLOC_007551	TEAD1	11	12674590	12944483	28.9797	30.1367	0.0564759	0.8504	0.99965	NEUTRAL
XLOC_007556	ARNTL	11	13276651	13387266	6.49567	5.88299	-0.14293	0.68535	0.99965	NEUTRAL
XLOC_007560	FAR1	11	13668669	13732346	14.1355	22.0487	0.64137	0.0642	0.99965	NEUTRAL
XLOC_007564	SPON1	11	13962688	14273691	0.72481	0.684149	-0.0832927	0.8961	0.99965	NEUTRAL
XLOC_007580	C11orf58	11	15966448	16756881	87.7513	84.043	-0.0622937	0.8609	0.99965	NEUTRAL
XLOC_007586	NUCB2	11	17208152	17349974	80.6132	85.734	0.0888501	0.78485	0.99965	NEUTRAL
XLOC_007588	NCR3LG1	11	17351725	17377341	0.675415	0.861462	0.351013	0.3528	0.99965	NEUTRAL
XLOC_007589	RP1-239B22.5	11	17380648	17383531	0.562549	0.525022	-0.0996022	0.84795	0.99965	NEUTRAL
XLOC_007599	RP11-113D6.10	11	18112471	18248643	0.433468	0.412061	-0.0730683	0.89975	0.99965	NEUTRAL
XLOC_007602	GTF2H1	11	18322294	18367044	19.3828	22.2395	0.198347	0.4679	0.99965	NEUTRAL
XLOC_007604	LDHA	11	18394387	18408425	1686.1	1722.48	0.0307932	0.93835	0.99965	NEUTRAL
XLOC_007612	TMEM86A	11	18693121	18792721	0.465607	0.470016	0.0135986	0.9861	0.99965	NEUTRAL
XLOC_007616	ZDHHC13	11	19117098	19176422	4.921	5.04808	0.0367821	0.9081	0.99965	NEUTRAL
XLOC_007619	NAV2	11	19350723	20121598	2.90975	3.21837	0.145436	0.7586	0.99965	NEUTRAL
XLOC_007623	HTATIP2	11	20363684	20383783	8.65093	6.69358	-0.370078	0.3016	0.99965	NEUTRAL
XLOC_007624	PRMT3	11	20387529	20509294	8.39191	6.98513	-0.264712	0.38065	0.99965	NEUTRAL
XLOC_007655	FIBIN	11	26994183	26996121	7.83683	7.49821	-0.0637237	0.8377	0.99965	NEUTRAL
XLOC_007659	BDNF-AS	11	27506837	27877648	0.953993	0.79341	-0.265913	0.839	0.99965	NEUTRAL
XLOC_007663	METTL15	11	28020619	28333507	5.62229	4.72491	-0.250872	0.4371	0.99965	NEUTRAL
XLOC_007667	RP11-115J23.1	11	28702614	29063821	0.750523	0.792585	0.0786698	0.9251	0.99965	NEUTRAL
XLOC_007669	RP11-466I1.1	11	29159955	29266734	0.401805	0.506746	0.334769	0.7814	0.99965	NEUTRAL
XLOC_007680	ARL14EP	11	30323050	30338227	13.5632	13.7818	0.0230704	0.95515	0.99965	NEUTRAL
XLOC_007686	DNAJC24	11	31369839	31431849	9.08699	6.935	-0.389907	0.2076	0.99965	NEUTRAL
XLOC_007687	ELP4	11	31509749	31783998	6.29598	5.70624	-0.14189	0.66565	0.99965	NEUTRAL
XLOC_007688	RCN1	11	31784791	32105755	168.975	171.932	0.0250206	0.9289	0.99965	NEUTRAL
XLOC_007696	EIF3M	11	32583797	32794658	107.96	97.1073	-0.152845	0.61175	0.99965	NEUTRAL
XLOC_007699	QSER1	11	32893177	32993316	6.8222	6.20233	-0.137427	0.61675	0.99965	NEUTRAL
XLOC_007700	DEPDC7	11	33015863	33033582	6.59443	4.23971	-0.637282	0.06715	0.99965	NEUTRAL
XLOC_007701	TCP11L1	11	33039416	33191598	10.0811	9.48697	-0.0876271	0.84505	0.99965	NEUTRAL
XLOC_007702	LINC00294	11	33039416	33191598	5.11802	4.17733	-0.293004	0.6139	0.99965	NEUTRAL
XLOC_007704	RP1-89D4.1	11	33237007	33237409	1.10978	1.24523	0.166134	0.8803	0.99965	NEUTRAL
XLOC_007705	HIPK3	11	33256671	33357023	12.1971	10.949	-0.15575	0.567	0.99965	NEUTRAL
XLOC_007708	KIAA1549L	11	33542071	33696701	6.81785	7.6715	0.170191	0.61175	0.99965	NEUTRAL
XLOC_007715	CAPRIN1	11	34051682	34101156	55.2058	53.768	-0.0380715	0.89105	0.99965	NEUTRAL
XLOC_007716	NAT10	11	34105601	34147670	9.52186	9.24883	-0.0419728	0.8786	0.99965	NEUTRAL
XLOC_007719	CAT	11	34438924	34472062	24.6686	22.1057	-0.158253	0.56405	0.99965	NEUTRAL
XLOC_007724	PDHX	11	34853093	35020591	19.3603	17.5028	-0.145516	0.70255	0.99965	NEUTRAL
XLOC_007727	CD44	11	35138869	35232402	509.005	495.174	-0.0397462	0.9117	0.99965	NEUTRAL
XLOC_007732	FJX1	11	35618418	35620868	7.43762	6.98402	-0.0907826	0.7667	0.99965	NEUTRAL
XLOC_007734	TRIM44	11	35662804	35818007	22.4508	23.8432	0.0868154	0.8951	0.99965	NEUTRAL
XLOC_007735	LDLRAD3	11	35943980	36232136	3.93357	3.52933	-0.156443	0.62695	0.99965	NEUTRAL
XLOC_007739	PRR5L	11	36296287	36465204	3.61751	4.88591	0.433633	0.3097	0.99965	NEUTRAL
XLOC_007743	C11orf74	11	36510708	36659290	11.3437	12.0521	0.0873961	0.80725	0.99965	NEUTRAL
XLOC_007765	API5	11	43311962	43494933	25.225	22.365	-0.173612	0.6175	0.99965	NEUTRAL
XLOC_007767	TTC17	11	43311962	43494933	16.3739	19.357	0.241463	0.5606	0.99965	NEUTRAL
XLOC_007771	HSD17B12	11	43556435	43880726	43.9596	34.9794	-0.329672	0.2079	0.99965	NEUTRAL
XLOC_007776	ALKBH3	11	43880810	43920944	12.0098	12.3504	0.0403469	0.91895	0.99965	NEUTRAL
XLOC_007777	C11orf96	11	43921058	44001157	0.733058	0.385954	-0.9255	0.1365	0.99965	NEUTRAL
XLOC_007779	ACCS	11	44065924	44084222	2.62505	3.72504	0.504909	0.244	0.99965	NEUTRAL
XLOC_007781	EXT2	11	44095548	44245429	92.2042	93.615	0.0219084	0.9392	0.99965	NEUTRAL
XLOC_007783	CD82	11	44564426	44620363	19.2297	20.367	0.0828962	0.78405	0.99965	NEUTRAL
XLOC_007786	TSPAN18	11	44719391	44951306	3.55316	4.35924	0.294975	0.6049	0.99965	NEUTRAL
XLOC_007788	PRDM11	11	45095805	45235292	1.99526	1.89257	-0.0762323	0.8347	0.99965	NEUTRAL
XLOC_007798	SLC35C1	11	45804071	45813015	10.5419	10.589	0.00642878	0.9809	0.99965	NEUTRAL
XLOC_007800	CRY2	11	45847117	45883248	3.45035	3.29343	-0.0671521	0.82565	0.99965	NEUTRAL
XLOC_007801	MAPK8IP1	11	45885650	45906465	1.44208	1.33105	-0.115582	0.79805	0.99965	NEUTRAL
XLOC_007808	CREB3L1	11	46277660	46321422	38.6615	38.6873	0.00096062	0.9977	0.99965	NEUTRAL
XLOC_007809	DGKZ	11	46332904	46380554	7.82284	8.37739	0.098809	0.74475	0.99965	NEUTRAL
XLOC_007811	MDK	11	46380755	46383837	68.3802	59.4745	-0.201307	0.4687	0.99965	NEUTRAL
XLOC_007812	ATG13	11	46602860	46674818	30.4825	28.6544	-0.0892234	0.76895	0.99965	NEUTRAL
XLOC_007813	ZNF408	11	46700817	46705912	4.84357	5.0676	0.0652346	0.83615	0.99965	NEUTRAL
XLOC_007816	C11orf49	11	46936688	47177125	8.18595	8.74718	0.0956681	0.86495	0.99965	NEUTRAL
XLOC_007817	DDB2	11	47214464	47239240	27.3701	27.4251	0.00289653	0.9924	0.99965	NEUTRAL
XLOC_007818	NR1H3	11	47239301	47269032	2.7403	3.04343	0.151359	0.8419	0.99965	NEUTRAL
XLOC_007819	MADD	11	47269160	47330031	6.35219	6.50351	0.033965	0.9435	0.99965	NEUTRAL
XLOC_007821	SLC39A13	11	47383147	47416501	74.2473	61.0828	-0.281571	0.324	0.99965	NEUTRAL
XLOC_007822	NDUFS3,PTPMT1	11	47465943	47584562	39.3777	41.3275	0.0697228	0.89485	0.99965	NEUTRAL
[truncated: 11,465 more rows]

## Sheet: Expressed only 1
Cuffmerge Gene ID	Gene Name	Chromosome	Gene Start (bp)	Gene End (bp)	FPKM 1	P_value	Q_value
XLOC_000016	AC114498.1	1	601435	724903	20478.6	0.16045	0.99965
XLOC_000232	Metazoa_SRP	1	15756606	15786594	0.841074	0.21525	0.99965
XLOC_001195	RP11-20O24.1	1	108970213	109042113	0.486904	0.23175	0.99965
XLOC_001335	U2	1	120489624	120579190	4.97573	0.234	0.99965
XLOC_002071	RPL34P6	1	200863807	200864152	0.487121	0.0523	0.99965
XLOC_002121	SNORA77	1	203626560	203744081	15.9756	0.1809	0.99965
XLOC_002323	RP11-396C23.3	1	226127177	226127346	2.06305	0.06325	0.99965
XLOC_002951	SDHDP6	1	25242236	25430192	0.417203	0.211	0.99965
XLOC_003359	AL353898.1	1	54053586	54112519	0.46734	0.21385	0.99965
XLOC_003578	RP11-290M5.4	1	85578499	85578742	0.543074	0.06325	0.99965
XLOC_004488	Metazoa_SRP	1	182573633	182589256	0.833142	0.2165	0.99965
XLOC_004961	SNORA14B	1	235109335	235128936	8.34588	0.21785	0.99965
XLOC_005099	AL603831.1	10	274189	689743	15.9726	0.2387	0.99965
XLOC_005375	RP11-324I22.3	10	35098005	35212958	0.773487	0.23625	0.99965
XLOC_005394	RP11-775A3.1	10	37883593	37884109	1.11151	0.0523	0.99965
XLOC_006163	Metazoa_SRP	10	125823545	125896436	0.744326	0.23275	0.99965
XLOC_006456	RP11-351M16.3	10	28433007	28495813	0.401881	0.06945	0.99965
XLOC_006726	RN7SL220P	10	67921898	68075348	0.648223	0.21285	0.99965
XLOC_007134	RP11-214N15.5	10	112446997	112818744	0.555867	0.2197	0.99965
XLOC_007150	PPIAP19	10	114690142	114690634	0.669675	0.0045	0.99309
XLOC_007181	AL355598.1,SNORA19	10	119029715	119080823	12.9596	0.2188	0.99965
XLOC_007333	AP006621.6	11	777577	784297	0.732239	0.19145	0.99965
XLOC_007605	AC084117.3	11	18394387	18408425	0.825609	0.1216	0.99965
XLOC_007768	RP11-484D2.4	11	43311962	43494933	1.43628	0.2374	0.99965
XLOC_008037	RN7SL23P	11	61402640	61490931	0.394905	0.24945	0.99965
XLOC_008340	SNORD15B	11	75399485	75422280	9.50659	0.13995	0.99965
XLOC_009331	RN7SKP287	11	43311962	43494933	0.428934	0.23225	0.99965
XLOC_009379	RP11-750H9.5	11	47383147	47416501	0.436834	0.17245	0.99965
XLOC_012375	AC079951.1,SNORA34	12	48653400	48682238	14.9047	0.23235	0.99965
XLOC_012376	SNORA2A	12	48653400	48682238	8.3459	0.2327	0.99965
XLOC_012668	RP11-366L20.3	12	65758019	65966295	0.6064	0.2199	0.99965
XLOC_013051	DYNLL1P4	12	113789541	113789807	0.428267	0.06325	0.99965
XLOC_013086	VSIG10	12	118063592	118145584	0.519712	0.201	0.99965
XLOC_013116	RPL31P52	12	120438089	120469793	0.65147	0.1925	0.99965
XLOC_013119	RP11-18C24.8	12	120500734	120501090	0.45912	0.0523	0.99965
XLOC_013169	RP11-972P1.10	12	123457640	123533718	0.568989	0.24475	0.99965
XLOC_013180	RP11-214K3.22	12	123762187	124316024	0.440593	0.20655	0.99965
XLOC_013184	RP11-214K3.18	12	123762187	124316024	0.462674	0.2024	0.99965
XLOC_013211	RP11-575F12.2	12	127145071	127146532	0.459322	0.02325	0.99965
XLOC_014506	FARP1-AS1	13	98142561	98578830	0.554547	0.21755	0.99965
XLOC_015503	AL162151.3	14	98973313	98973471	2.93796	0.06325	0.99965
XLOC_018241	RP11-139H15.5	15	55202965	55508234	0.394575	0.1769	0.99965
XLOC_018579	RNU1-77P	15	82130229	82262763	2.56232	0.2391	0.99965
XLOC_018680	RP11-697E2.10	15	90249529	90314499	1.40134	0.23105	0.99965
XLOC_018772	RNU6-322P	15	100551819	100551922	121.393	0.06325	0.99965
XLOC_019033	RP11-166B2.5	16	11851648	11916082	0.400396	0.2223	0.99965
XLOC_019233	NPIPB8	16	28637653	28658682	0.638351	0.00155	0.545674
XLOC_020826	RP11-95H3.1	16	65141755	65176713	0.453442	0.0204	0.99965
XLOC_021618	RPS12P28	17	28648355	28702684	0.501957	0.1997	0.99965
XLOC_021899	PTP4A2P1	17	42533531	42534009	0.419829	0.02085	0.99965
XLOC_022244	RP11-87N3.6	17	64499615	64662068	0.486904	0.1548	0.99965
XLOC_022399	SNORD1B	17	76557765	76586956	1656.18	0.2277	0.99965
XLOC_022681	MIR324	17	7189889	7225273	47.4323	0.2192	0.99965
XLOC_022690	Metazoa_SRP	17	7378792	7379060	0.420402	0.06325	0.99965
XLOC_022730	RP11-85B7.5	17	9244665	9244897	0.620097	0.06325	0.99965
XLOC_022769	RP11-597M12.1	17	12665889	12991643	0.515658	0.20345	0.99965
XLOC_023058	RNA5SP437	17	31937017	32001045	12.1101	0.2191	0.99965
XLOC_023140	CCL3	17	36072865	36090169	1.31634	5e-05	0.07393
XLOC_023444	RP11-6N17.3	17	47896149	47941410	0.773486	0.23955	0.99965
XLOC_023729	MIR635	17	68259181	68763882	443.37	0.1579	0.99965
XLOC_023794	RP11-649A18.5	17	75135247	75182983	0.559797	0.20615	0.99965
XLOC_025098	Metazoa_SRP	18	76822606	76970727	0.864639	0.2328	0.99965
XLOC_025548	CTD-2538G9.5	19	16829399	16880353	0.425759	0.2001	0.99965
XLOC_025878	CTB-102L5.8	19	37907227	38208372	0.492494	0.217	0.99965
XLOC_025939	Metazoa_SRP	19	40447788	40465840	0.472126	0.2368	0.99965
XLOC_026097	PLA2G4C-AS1	19	48047842	48110817	0.4548	0.19365	0.99965
XLOC_026627	CTB-180A7.6	19	6379568	6412404	0.466207	0.2196	0.99965
XLOC_026815	CTD-2189E23.2	19	14254188	14293205	2.40186	0.06735	0.99965
XLOC_026840	AC004257.1	19	15221014	15222297	0.388137	0.06325	0.99965
XLOC_026943	CTC-412M14.6	19	19699202	19699409	0.893181	0.06325	0.99965
XLOC_027392	AC007193.8	19	46346993	46392981	1.28209	0.22035	0.99965
XLOC_029230	AC067945.4	2	191021525	191151596	0.396801	0.2379	0.99965
XLOC_029284	RNU6-31P	2	200830008	200830116	70.412	0.06325	0.99965
XLOC_029999	AC020594.5	2	33436323	33564750	0.50676	0.17015	0.99965
XLOC_030298	RP11-401N16.1	2	69829641	69881396	0.477125	0.2418	0.99965
XLOC_030603	HMGN2P22	2	100591149	100591324	3.49526	0.0523	0.99965
XLOC_030656	AC009963.3	2	107902996	107903134	7.05622	0.06325	0.99965
XLOC_031990	AL121753.1	20	35214588	35214689	153.365	0.06325	0.99965
XLOC_032991	WI2-87327B8.2	20	62596731	62603115	0.570787	0.00145	0.52292
XLOC_033168	AP000473.5	21	16630826	16640683	0.777384	0.00135	0.52292
XLOC_033344	TIMM9P2	21	39184175	39323218	0.428267	0.225	0.99965
XLOC_033964	Metazoa_SRP	22	20070715	20070965	0.502596	0.06325	0.99965
XLOC_034241	RNU6-564P	22	30331987	30429053	108.413	0.2392	0.99965
XLOC_034346	Metazoa_SRP	22	37570245	37582616	0.963746	0.0528	0.99965
XLOC_034357	AL031587.1	22	37943049	38041915	306.729	0.2427	0.99965
XLOC_035030	Z97055.1	22	43904595	43904681	1208.05	0.06325	0.99965
XLOC_035366	Metazoa_SRP	3	39161269	39161520	0.497263	0.06325	0.99965
XLOC_035646	AC096922.2	3	68688479	68688588	63.5918	0.06325	0.99965
XLOC_035856	Metazoa_SRP	3	109293787	109316517	0.453599	0.1594	0.99965
XLOC_036168	ZIC4-AS1	3	147386045	147510293	0.420402	0.1892	0.99965
XLOC_036206	RNA5SP145	3	151085696	151458709	47.9178	0.1225	0.99965
XLOC_036858	ATP6V0E1P2	3	41194836	41962430	0.531171	0.1797	0.99965
XLOC_037112	SCAANT1	3	63864556	64003462	0.476941	0.22895	0.99965
XLOC_037354	RP11-271C24.3	3	113716459	113746300	0.492506	0.2062	0.99965
XLOC_038118	SCARNA22	4	1871423	1982207	15.9747	0.23925	0.99965
XLOC_038134	HTT-AS1_2	4	3063470	3074514	1.74763	0.0727	0.99965
XLOC_038665	AC112719.1	4	76011183	76112802	153.365	0.1728	0.99965
XLOC_038688	RP11-109G23.1	4	78768498	78768750	0.492033	0.06325	0.99965
XLOC_038930	RP11-384K6.4	4	118640672	118640858	1.33948	0.06325	0.99965
XLOC_038998	RP11-314N14.1	4	131380012	131541397	0.461202	0.00835	0.99965
XLOC_040278	RP11-371F15.3	4	138819953	139012646	1.00984	0.0421	0.99965
XLOC_040944	RP11-159F24.3	5	43483958	43525310	0.871371	0.1729	0.99965
XLOC_041314	RP11-455B3.1	5	97881419	97922695	0.436411	0.0554	0.99965
XLOC_041544	MIR3661	5	134114710	134371047	286.347	0.1882	0.99965
XLOC_041588	AC106753.1	5	137814332	138051961	70.4121	0.2373	0.99965
XLOC_041637	VTRNA1-1	5	140711274	140711373	195.516	0.06325	0.99965
XLOC_043069	SNORD63	5	138554881	138575444	8732.39	0.21605	0.99965
XLOC_043084	CTD-2062A1.2	5	139526430	139628433	0.445146	0.22875	0.99965
XLOC_044617	RP3-523C21.2	6	132085083	132099279	0.45249	0.00535	0.99965
XLOC_044741	SNORA2	6	149594624	149594759	8.34588	0.06325	0.99965
XLOC_045355	Metazoa_SRP	6	33601006	33601255	0.508037	0.06325	0.99965
XLOC_045663	RP11-505P4.6	6	73461577	73509236	0.427772	0.2313	0.99965
XLOC_045863	RP11-249L21.4	6	108848415	108974472	0.45811	0.1292	0.99965
XLOC_046504	AC079780.3	7	23480752	23480959	0.893181	0.06325	0.99965
XLOC_047116	SNRPCP9	7	97885867	97886074	1.78636	0.0523	0.99965
XLOC_047650	RNY3	7	148983754	148983856	136.326	0.06325	0.99965
XLOC_048323	RP11-792A8.3	7	66628880	66844826	0.562662	0.2327	0.99965
XLOC_048431	AC007000.11	7	76978616	77416400	8.34588	0.21275	0.99965
XLOC_048605	RP11-126L15.4	7	100802564	100867009	0.42987	0.2183	0.99965
XLOC_048628	AC005086.2	7	101815903	102283957	0.719741	0.23865	0.99965
XLOC_049075	RP5-1142J19.2	7	157138912	157269372	0.878401	0.2229	0.99965
XLOC_049401	RNU5A-3P	8	30578317	30658251	39.3121	0.23025	0.99965
XLOC_050390	DEFB109P3	8	12115781	12178575	0.562297	0.21955	0.99965
XLOC_050445	AC100800.2	8	18527300	19084730	153.366	0.23675	0.99965
XLOC_050740	RP11-1070A24.1	8	53851807	53959303	1.16557	0.18905	0.99965
XLOC_051010	RNU6-925P	8	89900720	89900824	108.393	0.06325	0.99965
XLOC_051082	SNORA72	8	97868839	98046469	9.98981	0.1808	0.99965
XLOC_051298	RNU4-25P,RP11-55J15.2	8	127794532	128101253	1.66726	0.2449	0.99965
XLOC_051688	RP11-156G14.6	9	35592785	35592951	2.25652	0.06325	0.99965
XLOC_052280	RN7SL181P	9	121178136	121332843	0.388245	0.16795	0.99965
XLOC_052415	RP11-138E2.1	9	130044712	130045081	0.42987	0.0523	0.99965
XLOC_053372	RP11-9M16.2	9	114396723	114398503	1.84363	0.06325	0.99965
XLOC_053457	RP11-65N13.6	9	125261793	125367207	0.525035	0.2386	0.99965
XLOC_058599	FTX_4	X	73944323	74293574	4.54496	0.2327	0.99965
XLOC_058986	HDGFP1	X	131646638	131646890	0.492033	0.06325	0.99965
XLOC_059713	IGBP1-AS2	X	70133448	70166324	0.503324	0.23185	0.99965
XLOC_059735	AL590762.10	X	71366238	71532374	0.486907	0.24115	0.99965
XLOC_060126	Metazoa_SRP	X	129779978	129796963	0.682191	0.04965	0.99965

## Sheet: Expressed_only 3
Cuffmerge Gene ID	Gene Name	Chromosome	Gene Start (bp)	Gene End (bp)	FPKM 3	P_value	Q_value
XLOC_000014	MTND1P23	1	601435	724903	0.630074	0.13825	0.99965
XLOC_000083	TP73-AS1	1	3630766	3747336	3.4763	0.23145	0.99965
XLOC_000180	RNU5E-1	1	11908151	11908271	14.7543	0.03285	0.99965
XLOC_000415	RP1-50O24.6	1	26876132	26890297	1.13148	0.22955	0.99965
XLOC_000442	RP3-426I6.6	1	27773182	27824452	0.502722	0.2294	0.99965
XLOC_000464	RNU11	1	28648599	28648733	6.75488	0.1215	0.99965
XLOC_000522	RP11-415J8.7	1	33256544	33300719	0.435148	0.21435	0.99965
XLOC_000884	RN7SL130P	1	63440769	63660245	0.455522	0.2199	0.99965
XLOC_001154	RP4-575N6.2	1	101256273	101256616	0.545494	0.0425	0.99965
XLOC_001395	CH17-270A2.1	1	145919012	145978848	0.847968	0.22045	0.99965
XLOC_001901	RP11-568K15.2	1	177923955	178038007	0.527609	0.2344	0.99965
XLOC_002356	AL139288.1	1	228456978	228457873	4.51661	0.1821	0.99965
XLOC_002833	ANO7P1	1	16215908	16228027	0.566083	0.0188	0.99965
XLOC_002858	AC004824.2	1	17308194	17364004	0.846921	0.02735	0.99965
XLOC_003158	SNORA55	1	39560815	39576790	5.326	0.2028	0.99965
XLOC_003430	DLEU2_6	1	63440769	63660245	5.03386	0.206	0.99965
XLOC_003944	U1	1	145465616	145465780	1.581	0.03285	0.99965
XLOC_004050	RP11-126K1.2	1	151280023	151327715	0.438601	0.2072	0.99965
XLOC_004401	MIR199A2	1	171841497	172468831	36.171	0.2383	0.99965
XLOC_004620	RP11-480I12.2	1	202724490	202809470	1.66067	0.2015	0.99965
XLOC_004901	RNA5SP18	1	228647911	228648032	13.6269	0.03285	0.99965
XLOC_004974	RP4-580N22.2	1	235957878	235971825	0.830004	0.03285	0.99965
XLOC_005321	RP11-218D6.3	10	27999787	28049615	0.439397	0.028	0.99965
XLOC_005402	RP11-508N22.6	10	38161569	38161749	1.03031	0.03285	0.99965
XLOC_005494	GLUD1P8	10	47563603	47569697	0.654249	0.02765	0.99965
XLOC_006409	RP11-573G6.10	10	22340376	22340615	0.40035	0.03285	0.99965
XLOC_007380	KCNQ1OT1_5	11	2444683	2861568	0.467586	0.22265	0.99965
XLOC_008114	AP001092.4	11	64606173	64723188	0.652741	0.2108	0.99965
XLOC_008218	MIR6753	11	68039015	68121444	4.74361	0.21445	0.99965
XLOC_008385	RP11-802F5.1	11	78652830	79440948	0.624313	0.22145	0.99965
XLOC_008716	AP003391.1	11	119093853	119095467	7.7509	0.2281	0.99965
XLOC_008792	RP11-677M14.6	11	124766497	124834487	0.491616	0.16735	0.99965
XLOC_008874	RP11-700F16.3	11	134068924	134247792	0.572919	0.2011	0.99965
XLOC_008894	RP11-326C3.7	11	307630	315272	0.432698	0.2131	0.99965
XLOC_009109	Metazoa_SRP	11	9279531	9279816	0.524919	0.0795	0.99965
XLOC_009280	AC131263.1	11	33039416	33191598	1.29199	0.23255	0.99965
XLOC_010204	RP11-667M19.1	11	113733186	113773811	1.29188	0.2189	0.99965
XLOC_010884	RP3-432I18.1	12	47593207	47593440	1.28696	0.0425	0.99965
XLOC_011034	HOTAIR_3	12	53962307	53977643	157.111	0.2357	0.99965
XLOC_011423	MIR331	12	95308409	95308520	32.8097	0.03285	0.99965
XLOC_011568	RP3-473L9.4	12	111369281	111403310	0.429858	0.05585	0.99965
XLOC_012778	RP11-359M6.2	12	78863992	79503396	0.383176	0.1592	0.99965
XLOC_012965	RP11-144F15.1	12	106357657	106889316	0.411365	0.1995	0.99965
XLOC_013181	RP11-214K3.21	12	123762187	124316024	0.600552	0.16235	0.99965
XLOC_013270	AC137590.1	12	131949919	132081102	758.913	0.2367	0.99965
XLOC_013329	RP11-523H24.3	13	19674623	19783019	0.618674	0.19685	0.99965
XLOC_013591	DLEU2_1	13	49982551	50849905	29.5117	0.23405	0.99965
XLOC_014537	COX5BP6	13	100603926	100675093	0.575977	0.2278	0.99965
XLOC_015148	CTD-2002H8.2	14	57999734	58298139	0.486614	0.2024	0.99965
XLOC_015304	RP5-892G5.2	14	74084795	74201235	0.419095	0.19865	0.99965
XLOC_015805	RN7SL650P	14	21385193	21456126	0.71156	0.2157	0.99965
XLOC_015816	AE000658.30	14	21698953	21699151	0.713401	0.03285	0.99965
XLOC_016171	U3	14	63651295	63651499	0.64345	0.03285	0.99965
XLOC_016563	RP11-477I4.4	14	104815448	104815753	0.683283	0.0425	0.99965
XLOC_017062	RNU6-516P	15	40488040	40565057	68.0257	0.2297	0.99965
XLOC_017120	PDIA3P2	15	43628502	43684339	1.92174	0.1759	0.99965
XLOC_017271	RP11-123C21.1	15	58587506	58749978	0.613434	0.2167	0.99965
XLOC_017338	AC100830.5	15	64687572	64719602	0.396222	0.20285	0.99965
XLOC_017346	RNU5A-1	15	65234459	65300618	41.3052	0.2049	0.99965
XLOC_017565	UBE2Q2P6	15	82445718	82454837	0.593137	0.0058	0.99965
XLOC_017950	RP11-932O9.8	15	30604125	30614561	0.397133	0.1222	0.99965
XLOC_018389	IQCH-AS1	15	67201032	67530143	0.45592	0.2345	0.99965
XLOC_018517	RP11-797A18.6	15	77041403	77083984	0.660223	0.1625	0.99965
XLOC_018569	RP11-775C24.5	15	80999592	80999981	0.438177	0.0425	0.99965
XLOC_019955	RP5-1142A6.5	16	88696494	88706421	0.558987	0.21155	0.99965
XLOC_020794	SNORA46	16	58515478	58629886	10.6621	0.21665	0.99965
XLOC_020922	AC009060.1	16	70216894	70217003	39.9529	0.03285	0.99965
XLOC_020992	RP11-252K23.2	16	75293697	75465497	0.624363	0.22865	0.99965
XLOC_021213	RP11-74E22.6	17	2688472	2688960	1.1541	0.0095	0.99965
XLOC_021360	CTC-297N7.10	17	10672473	10815164	2.58376	0.22055	0.99965
XLOC_021400	ZNF29P	17	15565482	15684311	1.4043	0.22365	0.99965
XLOC_021629	RP11-20B24.7	17	28879334	28897679	0.503355	0.20865	0.99965
XLOC_021642	RP11-68I3.4	17	29560546	30186475	0.661205	0.2036	0.99965
XLOC_021695	RP11-805L22.3	17	31762439	31769048	0.390314	0.0187	0.99965
XLOC_021709	RP11-227G15.11	17	32410158	32410746	0.473088	0.00475	0.99965
XLOC_021760	AC015849.13	17	35574794	35868891	0.385375	0.156	0.99965
XLOC_021951	U3	17	44299573	44318671	0.400351	0.2111	0.99965
XLOC_022036	RP11-501C14.9	17	48874859	48929056	0.467921	0.19515	0.99965
XLOC_022041	RP11-501C14.7	17	48995265	49055650	0.446638	0.1909	0.99965
XLOC_022223	RP11-269G24.7	17	63009555	63432211	0.434134	0.2162	0.99965
XLOC_022308	SNRPGP4	17	69147213	69327244	0.450287	0.21625	0.99965
XLOC_022585	RP1-59D14.8	17	2405561	2511891	29.8123	0.22625	0.99965
XLOC_023048	RP11-848P1.7	17	31008153	31008319	1.48844	0.03285	0.99965
XLOC_023055	RNU6ATAC7P	17	31563767	31563894	8.77481	0.03285	0.99965
XLOC_023123	CTC-507E2.2	17	35574794	35868891	0.473626	0.19	0.99965
XLOC_023613	AC005702.4	17	60042545	60042627	1487.36	0.03285	0.99965
XLOC_023755	SCARNA24	17	72645948	73092712	4.76544	0.23915	0.99965
XLOC_023858	RN7SL454P	17	78378639	78577394	0.383176	0.22105	0.99965
XLOC_024159	AC091038.1	18	21704956	21870957	108.161	0.22135	0.99965
XLOC_024690	RP11-756J15.3	18	13217497	13652755	1.82368	0.1661	0.99965
XLOC_024752	RNU6-702P	18	22169442	22205229	49.0878	0.22895	0.99965
XLOC_024955	SNORA37	18	54151600	54224788	15.36	0.2355	0.99965
XLOC_025257	CTC-518P12.6	19	4838331	4867768	0.383883	0.2044	0.99965
XLOC_025275	CTC-232P5.1	19	5978402	6199572	0.423184	0.17385	0.99965
XLOC_025329	AC130469.2	19	8580241	8610735	0.440073	0.21565	0.99965
XLOC_025389	RN7SL192P	19	10961000	11065395	0.474579	0.2233	0.99965
XLOC_025480	AC022098.2	19	14137178	14206187	3.20883	0.2233	0.99965
XLOC_025487	SNRPGP15	19	14477759	14496149	0.492683	0.22565	0.99965
XLOC_025544	CTD-2538G9.3	19	16712316	16712434	17.3906	0.03285	0.99965
XLOC_025655	VN1R80P	19	21063923	21064261	0.560391	0.0425	0.99965
XLOC_025938	CTC-492K19.4	19	40440843	40444705	0.508358	0.1221	0.99965
XLOC_026167	Metazoa_SRP	19	50188185	50310545	0.545614	0.0699	0.99965
XLOC_026255	RPL39P36	19	53330674	53430413	2.06165	0.24105	0.99965
XLOC_026335	AC008746.5	19	54444812	54463711	0.521064	0.2005	0.99965
XLOC_026473	MIR6807	19	58544090	58550722	309.141	0.22465	0.99965
XLOC_026593	CTB-50L17.16	19	4457961	4471493	0.652398	0.0073	0.99965
XLOC_026687	CTD-2557P19.4	19	8778664	8778861	0.726369	0.03285	0.99965
XLOC_026986	VN1R84P	19	21719800	21720035	0.419026	0.03285	0.99965
XLOC_027034	CTB-151G24.1	19	27638482	27646483	0.669958	0.13845	0.99965
XLOC_027078	SNORA68	19	32597006	32678300	11.9698	0.22245	0.99965
XLOC_027223	CTC-246B18.10	19	39328352	39342372	2.44971	0.19035	0.99965
XLOC_027982	AC106870.2	2	29192773	29921566	0.68865	0.14655	0.99965
XLOC_028050	AC011247.3	2	38561977	38603586	0.857972	0.2238	0.99965
XLOC_028118	Metazoa_SRP	2	47345157	47387601	0.952919	0.04325	0.99965
XLOC_028632	AC012360.1	2	105264390	105330529	96.0344	0.22285	0.99965
XLOC_028669	AC073415.2	2	108786756	108885477	2.30315	0.11635	0.99965
XLOC_028672	RP11-537E18.1	2	109542981	109614206	0.43809	0.2284	0.99965
XLOC_028820	RNU6-395P	2	127843550	127858157	109.181	0.20705	0.99965
XLOC_028821	Metazoa_SRP	2	127843550	127858157	0.659268	0.2318	0.99965
XLOC_029187	PPP1R1C	2	181954240	182131398	0.387575	5e-05	0.07393
XLOC_029613	SCARNA6	2	233210050	233295674	0.618426	0.2289	0.99965
XLOC_030096	AC093702.1	2	45013213	45013668	0.483713	0.0425	0.99965
XLOC_030508	AC018696.1	2	90359808	90360032	0.479811	0.03285	0.99965
XLOC_031274	RP11-84A12.1	2	196831974	196832190	1.07029	0.0795	0.99965
XLOC_031309	AC007283.4	2	201116103	201176687	0.726485	0.24265	0.99965
XLOC_031900	RP13-401N8.1	20	25751217	25752761	0.414278	0.0795	0.99965
XLOC_031999	RN7SKP271	20	35626030	35700984	0.414278	0.2287	0.99965
XLOC_032517	RN7SKP74	20	18288282	18316996	0.665629	0.21595	0.99965
XLOC_032577	LINC01431	20	23356593	23358116	0.382966	0.0132	0.99965
XLOC_033264	SNORA81	21	31659621	31668931	1.10688	0.22615	0.99965
XLOC_033683	SNORA80A	21	32291812	32393026	5.03387	0.2372	0.99965
XLOC_034150	KB-226F1.2	22	23966900	23983911	0.671934	0.12045	0.99965
XLOC_034287	RP1-149A16.16	22	32386667	32386868	0.676832	0.03285	0.99965
XLOC_035240	AC097635.5	3	20012451	20012606	2.13764	0.03285	0.99965
XLOC_035277	RPS20P15	3	27372720	27484420	0.438339	0.2331	0.99965
XLOC_035584	ARF4-AS1	3	57571362	57600927	0.760964	0.1632	0.99965
XLOC_035831	Y_RNA	3	106688677	106688779	170.84	0.0795	0.99965
XLOC_036446	RP11-537I16.2	3	185582495	185633551	0.474373	0.24115	0.99965
XLOC_036659	Metazoa_SRP	3	12484431	12664226	0.558813	0.2033	0.99965
XLOC_036801	RP11-10C24.2	3	33793643	33794145	0.492117	0.0095	0.99965
XLOC_036848	RNU5B-2P	3	40498890	40499003	27.1182	0.03285	0.99965
XLOC_037121	RP11-88H12.2	3	65353524	66038834	0.694843	0.1971	0.99965
XLOC_037152	LINC00877	3	72035299	72279503	0.419026	0.0175	0.99965
XLOC_037486	RP11-723O4.7	3	128879595	129040742	0.45592	0.2262	0.99965
XLOC_037608	ATP1B3-AS1	3	141876123	141926514	0.464002	0.21715	0.99965
XLOC_037893	RNA5SP149	3	180161885	180161977	308.976	0.03285	0.99965
XLOC_038017	RP11-534C12.1	3	194584010	194672477	3.59255	0.2234	0.99965
XLOC_038426	RP11-1E6.1	4	43340874	43345600	0.463229	0.01135	0.99965
XLOC_038573	RP11-17P16.2	4	67612651	67701179	0.962315	0.2258	0.99965
XLOC_038819	RP11-10L12.1	4	102631487	102760994	0.678259	0.21585	0.99965
XLOC_038868	HIGD1AP14	4	109560204	109703583	0.805722	0.22325	0.99965
XLOC_039078	C4orf51	4	145680203	145938635	0.575984	0.10175	0.99965
XLOC_039758	RN7SKP30	4	55395956	55547889	0.572963	0.21155	0.99965
XLOC_040018	AC109925.1	4	94450650	94450892	1.22847	0.0425	0.99965
XLOC_040040	ADH1A	4	99088856	99301356	0.572365	0.12615	0.99965
XLOC_040703	Metazoa_SRP	5	7239780	7240018	0.809743	0.0795	0.99965
XLOC_040724	CTD-2201E9.4	5	9001773	9546075	0.434457	0.1895	0.99965
XLOC_041555	RNU6-757P	5	134601143	134727823	108.259	0.22685	0.99965
XLOC_041608	AC011404.1,SNORA74A	5	138946719	139331677	1.42738	0.20975	0.99965
XLOC_041775	Metazoa_SRP	5	154818490	154876793	0.424686	0.23275	0.99965
XLOC_041895	SNORA74B	5	172983756	173035445	0.676832	0.2152	0.99965
XLOC_042053	BRD9P2	5	767381	768930	0.40035	0.03285	0.99965
XLOC_042569	RN7SL153P	5	72219408	72368395	0.498394	0.22975	0.99965
XLOC_042715	RNA5SP187	5	88189632	88498697	16.004	0.2394	0.99965
XLOC_042859	HMGN1P13	5	111496032	112017309	4.5251	0.23355	0.99965
XLOC_042956	RP11-395C3.1	5	126628018	126628319	0.935843	0.0187	0.99965
XLOC_042992	IL5	5	132541443	132664272	0.56402	0.14215	0.99965
XLOC_043222	RPLP1P6	5	151742315	151812785	0.56139	0.1877	0.99965
XLOC_043437	RP11-798K23.5	5	179527223	179527513	0.505701	0.0795	0.99965
XLOC_043690	HIST1H4C	6	26043226	26123926	0.488108	0.21335	0.99965
XLOC_043743	HIST1H4PS1	6	27807074	27807339	0.618418	0.0795	0.99965
XLOC_044271	RNU6-1016P	6	75601508	75718278	233.878	0.23925	0.99965
XLOC_044295	RP11-250B2.3	6	80443343	80465927	0.582459	0.0001	0.113738
XLOC_044505	RP1-142L7.5	6	112108759	112351296	0.679398	0.0853	0.99965
XLOC_044571	RP11-532N4.2	6	123216338	123637093	0.665423	5e-05	0.07393
XLOC_044887	RP11-35J6.1	6	168820422	168820656	0.847903	0.0795	0.99965
XLOC_045275	Y_RNA	6	31399783	31477506	122.227	0.20685	0.99965
XLOC_045467	RP11-387M24.5	6	43037616	43075099	0.538263	0.21375	0.99965
XLOC_045883	AL357515.1	6	110969772	110969872	108.161	0.03285	0.99965
XLOC_046955	RP5-1186P10.2	7	74606912	74607299	0.44196	0.0425	0.99965
XLOC_047196	CTA-313A17.3	7	102337315	102339115	1.09255	0.00225	0.70784
XLOC_047214	CTA-276O3.4	7	103297421	103989516	1.29188	0.2164	0.99965
XLOC_047500	RNU1-82P	7	141704337	141788640	1.53361	0.2384	0.99965
XLOC_048140	SNORA5A	7	45100099	45112047	5.63985	0.21025	0.99965
XLOC_048814	Metazoa_SRP	7	128455839	128506602	0.698423	0.2222	0.99965
XLOC_048816	RP11-212P7.1	7	128533651	128625905	0.582996	0.1113	0.99965
XLOC_049846	RBM12B-AS1	8	93213301	93741017	0.479811	0.23135	0.99965
XLOC_049934	KB-1980E6.3	8	102528739	102538668	0.468752	0.00275	0.7393
XLOC_050327	ALG1L13P	8	8228594	8244865	0.693338	0.0548	0.99965
XLOC_050374	RP11-589N15.2	8	11842523	11869448	0.404871	0.14995	0.99965
XLOC_050523	MIR3622B	8	27701193	27703789	204.189	0.028	0.99965
XLOC_050800	RN7SKP97	8	61057157	61714640	0.385624	0.1408	0.99965
XLOC_051251	RP11-557C18.4	8	122977025	122985629	0.599665	0.0425	0.99965
XLOC_051389	RP13-582O9.7	8	143289675	143298061	0.972292	0.19195	0.99965
XLOC_051594	RP11-370B11.3	9	22646199	22824213	0.467997	0.17225	0.99965
XLOC_051879	RP11-12A20.10	9	67717410	67719178	0.66537	0.2332	0.99965
XLOC_051939	AL359314.1	9	76611375	76906087	758.589	0.23155	0.99965
XLOC_051952	RP11-336N8.4	9	78219119	78219357	0.404871	0.03285	0.99965
XLOC_052046	RP11-305L7.6	9	91119061	91182762	0.674617	0.07735	0.99965
XLOC_052219	RNU6-432P	9	110873262	111038458	119.86	0.222	0.99965
XLOC_052290	RP11-498E2.9	9	122370529	122395703	0.49929	0.21555	0.99965
XLOC_052401	RP11-65J3.15	9	129328260	129328401	3.87545	0.03285	0.99965
XLOC_052495	RP11-432J22.2	9	135907811	135913513	0.87618	0.0187	0.99965
XLOC_052654	C9orf92	9	16203934	16276313	0.502678	0.01485	0.99965
XLOC_052922	RP11-49E18.1	9	60546919	60547154	0.419026	0.03285	0.99965
XLOC_053003	FAM27B	9	67725689	67726544	1.11797	0.1811	0.99965
XLOC_053109	RN7SKP264	9	86220264	86259657	0.509434	0.21495	0.99965
XLOC_053190	MIR3074	9	94726700	95087218	893.586	0.22715	0.99965
XLOC_053220	MIR1302-8	9	97156569	97378524	8.20219	0.22255	0.99965
XLOC_053226	PTCSC2	9	97805934	97810008	0.64345	0.03285	0.99965
XLOC_053508	Metazoa_SRP	9	128724444	128772414	0.537148	0.2245	0.99965
XLOC_058015	MT-TC,MT-TY	MT	5760	5891	9032.12	0.10175	0.99965
XLOC_058019	MT-TP	MT	15955	16023	7163.72	0.03285	0.99965
XLOC_058062	RP11-692P14.1	X	8007377	8018160	1.10688	0.03285	0.99965
XLOC_059387	AC004656.1	X	24465220	24539837	96.0344	0.2279	0.99965
XLOC_059448	MID1IP1-AS1	X	38801431	38806537	0.464047	0.23315	0.99965
XLOC_059632	RP3-339A18.6	X	53431257	53434373	2.08105	0.2334	0.99965
XLOC_059726	RNU1-56P	X	71020274	71020438	1.581	0.03285	0.99965
XLOC_060202	DDX26B-AS1	X	135520082	135582510	0.421921	0.215	0.99965
XLOC_060690	TTTY16	Y	7699356	7701247	2.39364	0.0425	0.99965

## Sheet: P_Signicant
Cuffmerge Gene ID	Gene Name	Chromosome	Gene Start (bp)	Gene End (bp)	FPKM 1	FPKM 3	log2(fold_change)	P_value	Q_value	Regulation
XLOC_002353	OBSCN	1	228203505	228378876	0.523561	1.49798	1.51659	0.02505	0.99965	UP
XLOC_002764	NPPB	1	11857463	11858931	2.64642	7.15567	1.43504	0.00705	0.99965	UP
XLOC_005478	ANXA8L1,CH17-335B8.4	10	46369086	46537864	0.254064	0.688139	1.43751	0.0435	0.99965	UP
XLOC_005590	LINC01515	10	65570337	65768835	0.806304	2.00237	1.31231	0.01095	0.99965	UP
XLOC_006702	RTKN2	10	62183034	62268707	0.275724	0.614242	1.15558	0.02415	0.99965	UP
XLOC_006930	ACTA2	10	88879733	89015785	120.146	245.3	1.02976	0.00145	0.52292	UP
XLOC_007324	RASSF7	11	537526	564021	3.04611	6.12666	1.00813	0.01485	0.99965	UP
XLOC_007984	GLYATL1	11	58905397	59058659	0.116166	0.488407	2.0719	0.01175	0.99965	UP
XLOC_009946	DLG2	11	83455011	85627922	0.267569	0.626519	1.22745	0.04125	0.99965	UP
XLOC_013452	FRY	13	32025313	32299122	0.540039	1.75064	1.69675	0.00855	0.99965	UP
XLOC_017251	LINC00926	15	57300364	57307769	0.562459	1.517	1.4314	0.0145	0.99965	UP
XLOC_017572	SCARNA15,SNHG21	15	82750563	82806070	1.23997	3.66027	1.56164	0.02655	0.99965	UP
XLOC_017898	GABRB3	15	26543545	26949207	0.0911471	0.505666	2.47192	0.02095	0.99965	UP
XLOC_018416	UACA	15	70654553	70763593	24.0204	49.0802	1.03088	0.00535	0.99965	UP
XLOC_019781	RP11-346C20.3,RP11-346C20.4	16	73060244	73062316	0.103913	0.755119	2.86133	0.03085	0.99965	UP
XLOC_022343	GPRC5C	17	74424850	74451653	0.204832	0.669259	1.70812	0.0406	0.99965	UP
XLOC_023587	SEPT4	17	58519836	58692055	0.319112	1.0901	1.77233	0.00695	0.99965	UP
XLOC_025413	ZNF69	19	11887783	11914329	0.553892	1.27757	1.20573	0.0442	0.99965	UP
XLOC_027201	MAP4K1	19	38587640	38618882	0.119544	0.530621	2.15014	0.02985	0.99965	UP
XLOC_027624	LILRA6,LILRB2,LILRB3	19	54200741	54281184	0.0488278	0.490187	3.32756	0.00435	0.974532	UP
XLOC_027921	DNAJC27-AS1	2	24943635	25039694	0.0291524	1.54473	5.7276	0.0282	0.99965	UP
XLOC_029656	ESPNL	2	238100156	238133287	0.0532215	0.462767	3.12021	0.01835	0.99965	UP
XLOC_030580	ANKRD36B	2	97492662	97589965	0.232609	0.631274	1.44036	0.03675	0.99965	UP
XLOC_032124	SLC12A5	20	46008907	46060152	0.0809247	0.52522	2.69827	0.0102	0.99965	UP
XLOC_033980	TMEM191A	22	20701113	20704606	0.277256	0.9453	1.76955	0.043	0.99965	UP
XLOC_034885	APOL3	22	36140329	36166177	1.03729	2.31905	1.16071	0.02085	0.99965	UP
XLOC_035360	ACVR2B	3	38451026	38493142	0.300328	0.632789	1.07518	0.0495	0.99965	UP
XLOC_036119	RP11-319G6.1	3	139389814	139678017	0.108889	0.718541	2.72222	0.0362	0.99965	UP
XLOC_037966	MASP1	3	187217284	187292022	1.41465	3.96537	1.48702	0.0097	0.99965	UP
XLOC_040116	CFI	4	109740693	109802179	1.15976	2.98356	1.36321	0.0068	0.99965	UP
XLOC_041168	F2RL1	5	76818932	76835315	0.242111	0.766263	1.66217	0.0277	0.99965	UP
XLOC_043817	HLA-H	6	29887293	29890482	0.704324	11.239	3.99613	5e-05	0.07393	UP
XLOC_044112	SLC25A27	6	46652914	46735693	0.149306	1.68019	3.49228	0.0014	0.52292	UP
XLOC_044519	RP11-544L8__B.4	6	113904137	113921642	0.501709	1.96502	1.96962	0.00075	0.382397	UP
XLOC_044565	PKIB	6	122471916	122726373	0.111959	0.582954	2.38041	0.03175	0.99965	UP
XLOC_044950	RP1-140K8.5	6	3904919	3911979	0.15203	0.399978	1.39557	0.01255	0.99965	UP
XLOC_046935	POM121B	7	73293496	73301161	0.0752602	0.453338	2.59063	0.03105	0.99965	UP
XLOC_047045	AC003991.3	7	88205117	88306891	0.0620289	0.429527	2.79174	0.01175	0.99965	UP
XLOC_049299	DMTN	8	22048994	22082527	0.156799	0.436277	1.47633	0.0224	0.99965	UP
XLOC_051592	LINC01239	9	22646199	22824213	0.120137	0.721596	2.58652	0.02435	0.99965	UP
XLOC_059230	PPP2R3B	X	333962	386955	1.91159	4.26796	1.15878	0.0384	0.99965	UP
XLOC_060180	MIR424,MIR503HG	X	134543336	134546721	0.441946	2.89562	2.71193	0.01755	0.99965	UP
XLOC_000897	PDE4B	1	65792513	66374579	6.79171	3.08392	-1.13901	0.0073	0.99965	Down
XLOC_000900	TCTEX1D1	1	66752458	66778787	1.13541	0.118278	-3.26296	0.01015	0.99965	Down
XLOC_001152	S1PR1	1	101236887	101241518	2.36129	1.13919	-1.05157	0.01135	0.99965	Down
XLOC_001177	NTNG1	1	107140006	107483458	0.758085	0.287797	-1.39731	0.029	0.99965	Down
XLOC_001628	SEMA4A	1	156147365	156177752	0.662564	0.123757	-2.42055	0.00475	0.99965	Down
XLOC_001734	FCRLB	1	161721562	161728143	0.888562	0.312127	-1.50934	0.0165	0.99965	Down
XLOC_002118	PRELP	1	203475827	203491352	0.438191	0.20122	-1.12279	0.03765	0.99965	Down
XLOC_002230	ATF3	1	212565333	212620777	5.8526	2.44961	-1.25653	0.00695	0.99965	Down
XLOC_002830	FAM131C	1	16057768	16073632	0.885379	0.354361	-1.32108	0.0475	0.99965	Down
XLOC_002887	SH2D5	1	20719731	20732837	1.69328	0.750505	-1.17388	0.0233	0.99965	Down
XLOC_003045	FABP3	1	31365624	31376850	4.29632	2.0957	-1.03567	0.04245	0.99965	Down
XLOC_003663	F3	1	94529224	94541800	1.05704	0.319921	-1.72425	0.01195	0.99965	Down
XLOC_005017	PLD5	1	242082985	242524696	3.37512	1.61612	-1.06241	0.03095	0.99965	Down
XLOC_005863	HHEX	10	92689950	92695646	1.4131	0.652931	-1.11386	0.03375	0.99965	Down
XLOC_006112	LINC01561	10	120597948	120600124	1.90532	0.884472	-1.10714	0.01855	0.99965	Down
XLOC_006973	RBP4	10	93566664	93604480	4.2914	1.69881	-1.33692	0.0123	0.99965	Down
XLOC_007215	CPXM2	10	123706206	123940267	2.69992	1.18382	-1.18947	0.0018	0.59144	Down
XLOC_007721	EHF	11	34621092	34661057	0.391034	0.0970749	-2.01012	0.04155	0.99965	Down
XLOC_008567	BIRC3	11	102317449	102339403	2.50608	1.15298	-1.12006	0.00275	0.7393	Down
XLOC_010088	MMP1	11	102746967	102843803	5.85809	1.95424	-1.58383	0.00035	0.235232	Down
XLOC_010817	ALG10	12	34022280	34056740	1.09625	0.483719	-1.18034	0.0331	0.99965	Down
XLOC_010983	NR4A1	12	52022831	52059507	10.5507	4.53079	-1.21951	0.01185	0.99965	Down
XLOC_011627	LINC00173	12	116533421	116536518	0.770773	0.094611	-3.02623	0.04555	0.99965	Down
XLOC_011778	RP11-575F12.3	12	127147148	127150081	0.520819	0.13503	-1.9475	0.0172	0.99965	Down
XLOC_012271	CPNE8	12	38646821	38909592	1.3602	0.575312	-1.2414	0.0344	0.99965	Down
XLOC_012437	GALNT6	12	51351246	51515763	2.32671	0.901008	-1.36868	0.01365	0.99965	Down
XLOC_012443	RP11-1100L3.8	12	52022831	52059507	9.75628	3.3432	-1.5451	0.03995	0.99965	Down
XLOC_012759	PHLDA1	12	76025446	76033932	46.5921	21.4193	-1.12117	5e-05	0.07393	Down
XLOC_012987	SELPLG	12	108622276	108641318	2.31288	1.12974	-1.0337	0.0216	0.99965	Down
XLOC_013607	FAM124A	13	51222333	51284241	0.436268	0.124259	-1.81186	0.03575	0.99965	Down
XLOC_014062	SHISA2	13	26044596	26051031	2.38288	0.504273	-2.24043	0.0001	0.113738	Down
XLOC_016042	RN7SL2	14	49862546	49862849	232.81	106.946	-1.12228	0.00025	0.184825	Down
XLOC_017044	SRP14-AS1	15	40039310	40067290	0.824194	0.194916	-2.08013	0.0452	0.99965	Down
XLOC_018206	CYP19A1	15	51037487	51338610	0.480042	0.0546967	-3.13364	0.0186	0.99965	Down
XLOC_019055	RP11-65J21.3	16	14302287	14326353	2.52065	0.661188	-1.93066	0.0411	0.99965	Down
XLOC_019522	HNRNPA1P48	16	51645755	51647132	0.865441	0.251224	-1.78446	0.0399	0.99965	Down
XLOC_019606	ADGRG1	16	57610651	57665580	1.79293	0.878923	-1.02851	0.0043	0.974532	Down
XLOC_020751	CES1	16	55802850	55833337	0.784949	0.284482	-1.46426	0.02645	0.99965	Down
XLOC_020913	NQO1	16	69706995	69726951	229.559	112.438	-1.02974	0.00015	0.130465	Down
XLOC_021853	CDC6	17	40287632	40304657	1.29426	0.310529	-2.05933	0.0084	0.99965	Down
XLOC_022831	RASD1	17	17494436	17496395	6.1358	1.65067	-1.8942	0.0002	0.164289	Down
XLOC_024253	DTNA	18	34493289	34891844	0.948272	0.235569	-2.00915	0.001	0.448061	Down
XLOC_024264	RP11-873E20.1	18	35716369	35717978	1.87629	0.914864	-1.03625	0.04395	0.99965	Down
XLOC_024407	PMAIP1	18	59899947	59904306	5.27924	2.22848	-1.24427	0.0011	0.472331	Down
XLOC_024428	TNFRSF11A	18	62325286	62391292	0.952955	0.446224	-1.09464	0.03565	0.99965	Down
XLOC_024444	SERPINB10,SERPINB2	18	63871691	63936111	19.5054	4.61046	-2.08089	5e-05	0.07393	Down
XLOC_024766	ANKRD29	18	23598925	23662885	5.30119	2.2321	-1.24791	0.00665	0.99965	Down
XLOC_024960	CCDC68	18	54901508	54959508	1.35076	0.377363	-1.83975	0.00085	0.418937	Down
XLOC_025210	TLE6	19	2977445	2995184	0.403774	0.0642947	-2.65078	0.03395	0.99965	Down
XLOC_025287	TNFSF9	19	6530998	6535928	1.39834	0.542106	-1.36707	0.0242	0.99965	Down
XLOC_026361	NLRP2	19	54923508	55001142	0.425686	0.0903613	-2.23601	0.02785	0.99965	Down
XLOC_026596	SEMA6B	19	4542592	4559808	0.460746	0.0730754	-2.65651	0.0435	0.99965	Down
XLOC_027206	LGALS4	19	38801670	38813364	0.493829	0.0861527	-2.51904	0.02335	0.99965	Down
XLOC_027787	RNF144A	2	6912276	7077880	1.17148	0.317816	-1.88207	0.0103	0.99965	Down
XLOC_027794	ID2	2	8666635	8684453	28.4404	13.291	-1.09749	0.00055	0.301196	Down
XLOC_027939	KCNK3	2	26692689	26733420	1.0246	0.418352	-1.29227	0.0213	0.99965	Down
XLOC_027960	GCKR	2	27496841	27523684	1.47176	0.369354	-1.99446	0.00545	0.99965	Down
XLOC_028939	KYNU	2	142877497	143055832	0.63741	0.135333	-2.23571	0.026	0.99965	Down
XLOC_028978	TNFAIP6	2	151357591	151380048	3.81842	1.29021	-1.56536	0.0018	0.59144	Down
XLOC_029547	CCL20	2	227813841	227817564	2.73339	0.648603	-2.07529	0.00565	0.99965	Down
XLOC_030348	C2orf81	2	74414175	74421591	0.984191	0.363484	-1.43705	0.0327	0.99965	Down
XLOC_030677	MALL	2	110083869	110116566	10.1068	4.85267	-1.05847	0.00015	0.130465	Down
XLOC_030709	IL1B	2	112829750	112836903	16.4133	7.24753	-1.1793	0.0005	0.29572	Down
XLOC_030995	NR4A2	2	156324431	156342348	3.84979	0.876821	-2.13442	5e-05	0.07393	Down
XLOC_033163	MIR99AHG	21	16070521	16627397	4.592	1.8532	-1.3091	0.04985	0.99965	Down
XLOC_033955	CDC45	22	19479458	19520612	0.532967	0.0531708	-3.32534	0.00325	0.814483	Down
XLOC_034363	MAFF	22	38111494	38216511	25.2184	12.4206	-1.02174	0.0005	0.29572	Down
XLOC_035651	MITF	3	69739434	69968337	1.03804	0.3912	-1.40788	0.0289	0.99965	Down
XLOC_036728	ZNF385D	3	21415070	22373321	3.46648	1.06114	-1.70785	0.01405	0.99965	Down
XLOC_000969	AK5	1	77282050	77559969	37.5337	21.4397	-0.807902	0.04845	0.99965	NEUTRAL
XLOC_001994	PLA2G4A	1	186828952	186988981	7.83447	4.21253	-0.895148	0.0032	0.814483	NEUTRAL
XLOC_002024	RGS2	1	192809038	192812283	9.3857	5.72948	-0.71206	0.0423	0.99965	NEUTRAL
XLOC_002209	TRAF5	1	211326614	211374946	4.41924	7.43764	0.751047	0.01435	0.99965	NEUTRAL
XLOC_002248	KCNK2	1	215005774	215237093	45.2628	29.9413	-0.596191	0.0476	0.99965	NEUTRAL
XLOC_002882	CAMK2N1	1	20482390	20486220	15.9602	8.69392	-0.876404	0.0027	0.7393	NEUTRAL
XLOC_003320	RAB3B	1	51907955	51990764	17.1093	11.6751	-0.551351	0.0381	0.99965	NEUTRAL
XLOC_003542	ADGRL4	1	78889763	79006718	25.159	16.0122	-0.651904	0.04615	0.99965	NEUTRAL
XLOC_003660	ARHGAP29	1	94148987	94275068	20.6922	12.5128	-0.725676	0.0093	0.99965	NEUTRAL
XLOC_004037	CTSK	1	150796207	150808323	9.81531	6.32239	-0.634565	0.04725	0.99965	NEUTRAL
XLOC_004076	FLG	1	152122533	152445456	14.7524	22.3495	0.599289	0.0287	0.99965	NEUTRAL
XLOC_004521	IVNS1ABP	1	185296387	185317329	49.0467	73.5816	0.585189	0.0356	0.99965	NEUTRAL
XLOC_004531	PTGS2	1	186671790	186680427	12.7248	7.80655	-0.704889	0.0175	0.99965	NEUTRAL
XLOC_005133	AKR1C1,AKR1C3	10	4922563	5135226	41.9146	22.8965	-0.872325	0.01015	0.99965	NEUTRAL
XLOC_005583	REEP3	10	63521362	63625123	17.7663	11.9107	-0.576887	0.03695	0.99965	NEUTRAL
XLOC_005998	GSTO1	10	104235355	104267459	104.583	69.9299	-0.580661	0.03285	0.99965	NEUTRAL
XLOC_006471	RP11-305E6.4	10	30302825	30306066	1.36336	0.685105	-0.992766	0.02585	0.99965	NEUTRAL
XLOC_006523	FZD8	10	35638248	35642278	8.93973	5.74627	-0.637607	0.02855	0.99965	NEUTRAL
XLOC_007106	ITPRIP	10	104309697	104338404	23.1214	14.1848	-0.704887	0.0108	0.99965	NEUTRAL
XLOC_007203	FGFR2	10	121478333	121598458	3.07141	5.66586	0.883396	0.0032	0.814483	NEUTRAL
XLOC_007967	SERPING1	11	57597386	57614853	29.0189	18.5094	-0.648735	0.0396	0.99965	NEUTRAL
XLOC_007988	FAM111A	11	59130132	59155039	10.0687	5.03568	-0.999618	0.01645	0.99965	NEUTRAL
XLOC_008156	CCDC85B	11	65890111	65891635	34.7937	20.6796	-0.750617	0.0086	0.99965	NEUTRAL
XLOC_008865	NTM	11	131370477	132336822	101.755	63.212	-0.686835	0.0405	0.99965	NEUTRAL
XLOC_009487	PRG2,RP11-872D17.8,SLC43A3	11	57386793	57427580	11.3892	6.70311	-0.76477	0.0182	0.99965	NEUTRAL
XLOC_009526	LPXN	11	58526870	58578220	30.4568	18.623	-0.709679	0.02295	0.99965	NEUTRAL
XLOC_009571	VPS37C	11	61130255	61161617	11.8548	7.85172	-0.594392	0.04165	0.99965	NEUTRAL
XLOC_009605	LRRN4CL	11	62686401	62689899	2.2566	1.23498	-0.869663	0.037	0.99965	NEUTRAL
XLOC_009691	FOSL1	11	65892048	65900573	40.7201	22.7578	-0.839378	0.00345	0.850195	NEUTRAL
XLOC_010147	KDELC2	11	108472104	108498432	18.196	11.1251	-0.7098	0.0078	0.99965	NEUTRAL
XLOC_010505	CD9	12	6199714	6238271	49.4539	32.3924	-0.610429	0.0245	0.99965	NEUTRAL
XLOC_010675	MGST1	12	16347141	16610594	51.1681	30.2475	-0.758428	0.008	0.99965	NEUTRAL
XLOC_010756	ARNTL2	12	27332853	27446625	10.8798	6.57309	-0.727008	0.0335	0.99965	NEUTRAL
XLOC_011007	KRT18	12	52897186	52952901	26.8881	50.2744	0.902856	0.0057	0.99965	NEUTRAL
XLOC_011207	HMGA2	12	65758019	65966295	11.0845	5.72148	-0.95408	0.01545	0.99965	NEUTRAL
XLOC_011299	ZDHHC17	12	76763587	76853696	11.4444	19.8489	0.79441	0.0386	0.99965	NEUTRAL
XLOC_011404	SOCS2	12	93542462	93583487	3.85939	2.18137	-0.823134	0.04295	0.99965	NEUTRAL
XLOC_012188	PTHLH	12	27958083	27972705	4.23142	2.3416	-0.85365	0.04845	0.99965	NEUTRAL
XLOC_012765	E2F7	12	77021246	77065580	5.56692	3.49722	-0.670672	0.04285	0.99965	NEUTRAL
XLOC_012961	NUAK1	12	106063339	106140033	10.2719	16.3765	0.67292	0.01465	0.99965	NEUTRAL
XLOC_013442	MEDAG	13	30881932	30977623	13.1128	8.82157	-0.571863	0.0447	0.99965	NEUTRAL
XLOC_013445	B3GALTL	13	31199935	31332276	3.48251	1.88838	-0.882981	0.00625	0.99965	NEUTRAL
XLOC_014429	SPRY2	13	80335975	80340951	16.3986	10.7168	-0.6137	0.03465	0.99965	NEUTRAL
XLOC_014577	IRS2	13	109752697	109808252	3.69764	2.40038	-0.623344	0.02955	0.99965	NEUTRAL
XLOC_015090	PTGER2	14	52314304	52328606	6.31903	4.05054	-0.641588	0.0465	0.99965	NEUTRAL
XLOC_015252	SMOC1	14	69854130	70032366	15.7754	8.502	-0.891799	0.0025	0.724804	NEUTRAL
XLOC_015842	SLC7A8	14	23125294	23183674	4.16967	2.16759	-0.943838	0.00645	0.99965	NEUTRAL
XLOC_015930	SPTSSA	14	33924230	34462774	8.79753	5.89172	-0.578411	0.0492	0.99965	NEUTRAL
XLOC_017377	CORO2B	15	68578968	68727806	4.24828	2.47956	-0.776792	0.01525	0.99965	NEUTRAL
XLOC_017404	THSD4	15	71096951	71783383	5.96084	3.77975	-0.657224	0.04275	0.99965	NEUTRAL
XLOC_018940	IL32	16	3065296	3087100	7.49281	4.45002	-0.751696	0.04035	0.99965	NEUTRAL
XLOC_019572	MT2A	16	56608198	56609497	862.974	458.457	-0.912529	0.00115	0.472331	NEUTRAL
XLOC_019573	MT1L	16	56617475	56618818	20.8471	11.6133	-0.844072	0.03945	0.99965	NEUTRAL
XLOC_019574	MT1E	16	56625474	56627112	115.587	70.9968	-0.703148	0.02475	0.99965	NEUTRAL
XLOC_019752	CALB2	16	71358712	71390438	8.13035	4.31732	-0.913182	0.00885	0.99965	NEUTRAL
XLOC_019882	MLYCD,OSGIN1,RP11-505K9.4	16	83899125	83966332	7.7034	4.22914	-0.86513	0.01215	0.99965	NEUTRAL
XLOC_019923	FOXC2	16	86565144	86569728	11.6919	7.70725	-0.601216	0.04015	0.99965	NEUTRAL
XLOC_021423	CCDC144A,RP11-219A15.1	17	16689536	16816540	5.74677	11.4098	0.989443	0.01805	0.99965	NEUTRAL
XLOC_022277	PITPNC1	17	67377280	67697261	6.23084	3.32073	-0.907926	0.03275	0.99965	NEUTRAL
XLOC_022438	C1QTNF1	17	79019208	79049788	33.4036	19.8183	-0.753168	0.00645	0.99965	NEUTRAL
XLOC_022528	AC144831.1	17	83104254	83106910	3.87592	2.2362	-0.793486	0.0275	0.99965	NEUTRAL
XLOC_023242	KRTAP1-5	17	41026025	41027202	143.617	83.0818	-0.789625	0.00415	0.95878	NEUTRAL
XLOC_023245	KRTAP1-1	17	41040558	41041461	19.197	11.5866	-0.728421	0.0229	0.99965	NEUTRAL
XLOC_023265	KRT31,KRT33B,KRT34	17	41363493	41397592	72.6664	50.0239	-0.538671	0.04825	0.99965	NEUTRAL
XLOC_023275	KRT19	17	41523616	41528308	23.8545	15.7638	-0.59765	0.0404	0.99965	NEUTRAL
XLOC_023278	KRT14	17	41582278	41586921	12.3296	6.79859	-0.858822	0.0082	0.99965	NEUTRAL
XLOC_024557	COLEC12	18	316736	500722	22.5011	14.9661	-0.588299	0.02755	0.99965	NEUTRAL
XLOC_024607	EPB41L3	18	5392380	5630700	5.81917	3.40878	-0.771557	0.00835	0.99965	NEUTRAL
XLOC_024888	PSTPIP2	18	45983535	46072272	7.83165	4.7695	-0.715479	0.0266	0.99965	NEUTRAL
XLOC_025886	SPRED3	19	38388420	38399587	3.63347	2.11411	-0.781301	0.03115	0.99965	NEUTRAL
XLOC_025908	ZFP36	19	39406812	39409412	9.7003	6.07017	-0.676293	0.03445	0.99965	NEUTRAL
XLOC_026085	DHX34	19	47349280	47382704	2.39521	4.45437	0.89507	0.036	0.99965	NEUTRAL
XLOC_026114	PPP1R15A	19	48872391	48876057	39.9126	22.3576	-0.836081	0.0023	0.708496	NEUTRAL
XLOC_026143	FCGRT	19	49506815	49526333	31.1723	20.7425	-0.587673	0.0422	0.99965	NEUTRAL
XLOC_026336	LENG8	19	54444812	54463711	30.1666	44.4518	0.559289	0.0455	0.99965	NEUTRAL
XLOC_026683	ADAMTS10	19	8580241	8610735	9.53559	17.1346	0.845521	0.04455	0.99965	NEUTRAL
XLOC_026903	UNC13A	19	17601327	17688365	1.45382	0.809503	-0.844739	0.02685	0.99965	NEUTRAL
XLOC_027132	DMKN	19	35497219	35513658	0.406242	0.220438	-0.881965	0.03235	0.99965	NEUTRAL
XLOC_027395	PNMAL1	19	46466490	46471563	3.48717	2.21282	-0.65617	0.0457	0.99965	NEUTRAL
XLOC_028039	QPCT	2	37344573	37373322	36.2019	22.6776	-0.674796	0.014	0.99965	NEUTRAL
XLOC_028561	LINC01125	2	97664216	97703064	0.218049	0.401329	0.880131	0.02545	0.99965	NEUTRAL
XLOC_028717	SLC20A1	2	112645856	112663827	40.7444	26.1405	-0.640312	0.04585	0.99965	NEUTRAL
XLOC_029646	MLPH	2	237485427	237555318	17.435	10.4741	-0.735161	0.03195	0.99965	NEUTRAL
XLOC_029849	OSR1	2	19351484	19358653	11.6124	6.6241	-0.809866	0.00745	0.99965	NEUTRAL
XLOC_030030	CYP1B1	2	37923186	38239590	70.0123	45.2691	-0.629081	0.0211	0.99965	NEUTRAL
XLOC_030717	RP11-395L14.18	2	113605866	113607908	7.42567	4.59068	-0.693814	0.03405	0.99965	NEUTRAL
XLOC_031741	SMOX	20	4120979	4187747	36.8948	18.9571	-0.96068	0.0006	0.316843	NEUTRAL
XLOC_032171	CEBPB	20	50184597	50192689	23.3229	15.907	-0.552088	0.04905	0.99965	NEUTRAL
XLOC_032357	RP5-850E9.3,SCRT2,SRXN1	20	646614	676179	45.5843	30.374	-0.585702	0.0307	0.99965	NEUTRAL
XLOC_032951	APCDD1L	20	58459100	58515131	12.008	8.16614	-0.556272	0.04415	0.99965	NEUTRAL
XLOC_033019	STMN3	20	63639704	63653427	7.66465	4.96939	-0.625152	0.0443	0.99965	NEUTRAL
XLOC_033555	BTG3	21	17593652	17633199	15.9384	10.3303	-0.625627	0.0415	0.99965	NEUTRAL
XLOC_033613	ADAMTS5	21	26889375	26966513	4.71583	2.67376	-0.818641	0.00395	0.957454	NEUTRAL
XLOC_033712	RCAN1	21	34513141	34615142	161.923	105.277	-0.62112	0.02385	0.99965	NEUTRAL
XLOC_034310	HMOX1	22	35380360	35394214	94.9086	49.5429	-0.93786	0.00015	0.130465	NEUTRAL
XLOC_034351	H1F0	22	37805092	37807436	49.2236	32.483	-0.599665	0.0284	0.99965	NEUTRAL
XLOC_034751	LRP5L	22	25351417	25405377	1.6046	3.15122	0.973696	0.0168	0.99965	NEUTRAL
XLOC_036244	TIPARP	3	156671861	156706770	45.5368	30.0841	-0.59803	0.0317	0.99965	NEUTRAL
XLOC_036347	ECT2	3	172750681	172821474	6.32598	4.11361	-0.620886	0.04475	0.99965	NEUTRAL
XLOC_036900	TMEM158	3	45224465	45226278	105.421	59.758	-0.818965	0.00285	0.752502	NEUTRAL
XLOC_037064	WNT5A	3	55465714	55490539	103.232	62.8902	-0.714982	0.0414	0.99965	NEUTRAL
XLOC_037125	LRIG1	3	66133609	66501263	7.94557	4.90291	-0.696512	0.0271	0.99965	NEUTRAL
XLOC_037257	DCBLD2	3	98714329	98901689	139.441	83.5598	-0.73877	0.01135	0.99965	NEUTRAL
XLOC_037419	CCDC14	3	123897304	123961408	13.7182	22.8172	0.734032	0.04585	0.99965	NEUTRAL
XLOC_037431	SLC12A8	3	125082635	125212864	4.03203	7.8325	0.957968	0.0122	0.99965	NEUTRAL
XLOC_037620	PCOLCE2	3	142815921	142889203	30.9105	19.1409	-0.691437	0.03595	0.99965	NEUTRAL
XLOC_037661	TM4SF1	3	149369021	149386583	233.923	142.113	-0.718995	0.0088	0.99965	NEUTRAL
XLOC_037841	NCEH1	3	172630248	172711218	13.1383	7.61463	-0.786938	0.00465	0.99965	NEUTRAL
XLOC_038466	DCUN1D4	4	51842999	51916837	12.3341	20.881	0.759535	0.0281	0.99965	NEUTRAL
XLOC_038626	SLC4A4	4	71187285	71572087	11.7458	7.18964	-0.708152	0.00925	0.99965	NEUTRAL
XLOC_038745	IBSP	4	87799580	87812435	6.17062	3.72718	-0.727329	0.0458	0.99965	NEUTRAL
XLOC_040417	CTSO	4	155924117	155953917	6.4847	3.65501	-0.827166	0.00985	0.99965	NEUTRAL
XLOC_041012	MAP3K1	5	56815573	56896152	1.4049	2.19179	0.641643	0.04605	0.99965	NEUTRAL
XLOC_041186	BHMT2	5	78997605	79236038	5.24186	2.62169	-0.99958	0.01575	0.99965	NEUTRAL
XLOC_041350	C5orf30	5	103258701	103278660	62.4804	38.3654	-0.703598	0.0111	0.99965	NEUTRAL
XLOC_041731	RP11-394O4.5	5	149430285	149432834	3.28027	5.9544	0.86014	0.00795	0.99965	NEUTRAL
XLOC_042789	DKFZp434P228	5	98768649	98798643	50.4934	26.3234	-0.939749	0.0041	0.95878	NEUTRAL
XLOC_043164	C5orf46	5	147870681	147906538	16.6893	27.279	0.708873	0.0365	0.99965	NEUTRAL
XLOC_043578	EDN1	6	12290362	12297194	7.11062	4.04972	-0.812152	0.01495	0.99965	NEUTRAL
XLOC_043615	RBM24	6	17281345	17293875	3.13205	1.87053	-0.743663	0.04095	0.99965	NEUTRAL
XLOC_043630	ID4	6	19534943	19840684	2.80746	4.69659	0.742351	0.0327	0.99965	NEUTRAL
XLOC_043954	HMGA1	6	34236872	34246231	140.566	77.0902	-0.866629	0.0017	0.584563	NEUTRAL
XLOC_043970	SCUBE3	6	35214418	35253079	3.40739	5.17062	0.60167	0.0349	0.99965	NEUTRAL
XLOC_044108	ENPP4	6	46129992	46146699	1.58713	0.872181	-0.863717	0.02455	0.99965	NEUTRAL
XLOC_044145	TRAM2-AS1	6	52577306	52583993	3.6652	1.86581	-0.974088	0.03715	0.99965	NEUTRAL
XLOC_044612	ENPP1	6	131808015	131895155	34.4828	22.7668	-0.598946	0.03305	0.99965	NEUTRAL
XLOC_045958	RP3-425C14.4	6	122436788	122439223	3.50282	2.10899	-0.731959	0.0478	0.99965	NEUTRAL
XLOC_046301	THBS2	6	169213253	169254044	62.8765	95.1799	0.598136	0.0312	0.99965	NEUTRAL
XLOC_046461	HDAC9	7	18086948	19002416	5.26009	2.9296	-0.844384	0.00695	0.99965	NEUTRAL
XLOC_046489	IL6	7	22725394	22732002	91.3344	57.9587	-0.656132	0.02635	0.99965	NEUTRAL
XLOC_047054	STEAP1	7	89882352	90238137	28.8746	14.7456	-0.969518	0.01735	0.99965	NEUTRAL
XLOC_047055	STEAP2	7	89882352	90238137	7.99785	4.47084	-0.839067	0.04325	0.99965	NEUTRAL
XLOC_047304	CPED1	7	120988676	121297444	13.9369	7.41223	-0.910933	0.01365	0.99965	NEUTRAL
XLOC_047355	RP11-274B21.1,RP11-274B21.13,RP11-274B21.14	7	128533651	128625905	4.5472	7.41855	0.706159	0.04865	0.99965	NEUTRAL
XLOC_047727	INSIG1	7	155297775	155310235	21.0607	13.7118	-0.61914	0.0324	0.99965	NEUTRAL
XLOC_049502	POLB	8	42338453	42371808	10.334	6.03332	-0.776377	0.0284	0.99965	NEUTRAL
XLOC_050367	FAM167A	8	11339636	11474715	10.3599	5.65387	-0.873696	0.0067	0.99965	NEUTRAL
XLOC_050660	PLAT	8	42175232	42207724	447.079	271.044	-0.722001	0.01865	0.99965	NEUTRAL
XLOC_050925	MRPS28,RP11-26J3.4,TPD52	8	79918716	80231232	18.9612	11.3098	-0.74548	0.04925	0.99965	NEUTRAL
XLOC_051046	GEM	8	94249252	94262350	5.22369	2.9847	-0.807483	0.0267	0.99965	NEUTRAL
XLOC_051242	HAS2	8	121612115	121644693	130.012	73.1586	-0.829548	0.0026	0.7393	NEUTRAL
XLOC_051528	LURAP1L	9	12685438	12822131	10.623	6.124	-0.794642	0.0129	0.99965	NEUTRAL
XLOC_051647	ANXA2P2	9	33624273	33625293	16.3115	8.99284	-0.859041	0.00965	0.99965	NEUTRAL
XLOC_052732	C9orf72	9	27546544	27573866	2.18454	1.19743	-0.867383	0.0265	0.99965	NEUTRAL
XLOC_053060	RFK	9	76385516	76394517	13.2689	8.42865	-0.654673	0.03075	0.99965	NEUTRAL
XLOC_053099	C9orf64	9	83938310	83956986	5.7982	3.66667	-0.661135	0.03805	0.99965	NEUTRAL
XLOC_053338	PTGR1	9	111525158	111599855	37.4641	24.7898	-0.595765	0.03415	0.99965	NEUTRAL
XLOC_058813	NXT2	X	109535780	109544690	3.13041	1.91091	-0.712096	0.04395	0.99965	NEUTRAL
XLOC_059248	MXRA5	X	3308564	3346641	2.4269	3.76762	0.634537	0.02775	0.99965	NEUTRAL
XLOC_059804	ATRX	X	77504877	77786269	9.38801	16.5457	0.817563	0.0333	0.99965	NEUTRAL
XLOC_060068	CUL4B	X	120524608	120575794	71.422	46.1989	-0.628509	0.02715	0.99965	NEUTRAL
