# Supplementary material for: Unravelling microRNA regulation and miRNA–mRNA regulatory networks in osteogenesis driven by 3D nanotopographical cues
Source: Royal Society of Chemistry journal article supplement (doi:10.1039/d3bm01597a), 2023-12-21
Supplement: d3bm01597a5.xlsx [file d3bm01597a5.xlsx]

## Sheet: ReadMe
Sample 1: Cells in 2D, Growth medium
Sample 2: Cells in 2D, Osteogenic medium
Sample 3: Cells in 3D, Growth medium
Description of the worksheets
ReadMe	Current Sheet
Summary	Summary of the project and workflow
Sample*	List of Novel miRNA predicted in Sample*
Description of columns in the worksheets
Chromosome	Chromosome number
miRNA ID	Novel miRNA id given based on type of tissue and sample
Strand	Strand in which the read aligns
MFE	Minimum free energy as calculated with Vienna Package for the secondary structure
Sequence	Novel miRNA sequence
Mature miRNA length	Novel mature miRNA length
Read Count	Number of reads supporting the novel miRNA
Precursor Start	Precursor start (genomic location)
Precursor End	Precursor end (genomic location)
Mature Start	Mature miRNA start
Mature End	Mature miRNA end

## Sheet: Summary
RESULTS
small RNAs [16-36nt]	Sample1	Sample2	Sample3	Sample4
Total reads that did not map to mirbase(used for novel miRNA prediction)	109272	125078	112873	137490
Total Reads Mapped to genome (Homo sapiens)	50913	63513	58348	72862
Total number of novel miRNA identified	84	142	81	135
Total number of novel miRNA's identified (>=10 Read count cut-off)	10	28	15	23
Total number of novel miRNA identified (>=50 Read count cut-off)	2	5	1	3

## Sheet: Sample 1
Chromosome	miRNA ID	Strand	MFE	Sequence	Mature miRNA length	Read Count	Precursor Start	Precursor End	Mature Start	Mature End
21	xxx-m0047-3p	+	-60.5	GCGCCCCGGGCGGGTCGCGCCG	22	681	8259234	8259328	8259297	8259318
1	xxx-m0037-3p	+	-32.3	AGTAAGCCGTTTTAAAAACTGTT	23	74	248874252	248874351	248874319	248874341
22	xxx-m0059-3p	-	-46.8	CCCCCGCGGGGGCCCGGGGCCT	22	49	38089447	38089537	38089457	38089478
1	xxx-m0039-3p	-	-60.1	GCGCGCGCGCGGGAGGGCGGGCA	23	17	234610229	234610320	234610239	234610261
16	xxx-m0018-5p	-	-18.1	TAAGCACTGCCTTTGAACCTGAT	23	13	58559859	58559942	58559910	58559932
3	xxx-m0065-5p	-	-29.9	GAGAGATCAGAGGCGCAGAGTGC	23	13	120084564	120084645	120084613	120084635
7	xxx-m0071-5p	+	-34.4	TCCCCTCCTGGCTGGCTCGCCA	22	13	64999309	64999389	64999319	64999340
9	xxx-m0077-5p	+	-57.4	AAGAGCAAAGAACCTGAGTGCCT	23	11	62662717	62662804	62662727	62662749
20	xxx-m0040-5p	+	-27.7	AAAGAACCAAGAATGGGCTGCCCT	24	10	3917553	3917651	3917563	3917586
2	xxx-m0060-5p	-	-42.2	GTCCCCAGACTCTCCCGGGCTGTG	24	10	17753263	17753340	17753307	17753330
21	xxx-m0054-3p	+	-43.9	GCCCGCGTGGCGGGGCCCGGA	21	9	46132222	46132314	46132284	46132304
2	xxx-m0061-5p	-	-29.5	TTCCCACTGTCCCTACCTACTTA	23	9	132279722	132279816	132279784	132279806
17	xxx-m0024-3p	-	-38.2	CGCCTGTCTCATTCTCTGCAGGT	23	8	43830096	43830188	43830106	43830128
21	xxx-m0051-3p	+	-51.3	ACCCGGCGGCCGTCGCGCGCCT	22	8	8439484	8439555	8439524	8439545
17	xxx-m0025-5p	-	-51.5	CCCGCGGGGCCGGAGGAGCCT	21	7	76710671	76710755	76710725	76710745
19	xxx-m0030-3p	-	-33.2	CCCGCCGCCCCTCCTCCTCCC	21	7	17686820	17686890	17686830	17686850
21	xxx-m0044-3p	+	-49.4	CTGCCGGGGCCCGCGGGCCTGCTG	24	7	8250250	8250344	8250311	8250334
21	xxx-m0048-5p	+	-53.8	CGACCTCGCCGTCCCGCCCGCC	22	7	8389633	8389728	8389643	8389664
6	xxx-m0070-5p	+	-38.7	ATATGTGTGTGTGCTTGTATATA	23	7	142013651	142013732	142013661	142013683
9	xxx-m0078-3p	+	-25	ATCTGAGGGCTGGGCACGGTGGC	23	7	71268485	71268568	71268536	71268558
16	xxx-m0017-5p	+	-19.1	ACACAGAGGACCGTACGTTTT	21	6	57300089	57300182	57300099	57300119
17	xxx-m0023-3p	-	-18.9	ATCCCTGAAAGTATAGTCTTAACG	24	6	19188002	19188099	19188012	19188035
21	xxx-m0043-5p	+	-48.2	GCCCCCGGCGCGCCGGGCCCGGG	23	6	8214124	8214220	8214134	8214156
12	xxx-m0009-3p	+	-28.9	GTTTCCTTTCTGCTCTGACCTGAC	24	5	96445948	96446031	96445998	96446021
13	xxx-m0012-5p	+	-54.9	ATTAATCCTCAAGCCTGTACAACC	24	5	75779119	75779206	75779129	75779152
18	xxx-m0026-3p	+	-49.51	GCCCCGCGGGGGCCCCGGCG	20	5	76495307	76495383	76495354	76495373
19	xxx-m0031-3p	-	-61.8	TGACTGTCCTATGTCTTTCCTTC	23	5	40282544	40282641	40282554	40282576
19	xxx-m0032-5p	-	-25.2	TGTCCCTGTTTGGGCGCCAC	20	5	51971800	51971873	51971844	51971863
1	xxx-m0034-3p	+	-52.5	AGTCCATTTCAAGTTAACTCTGT	23	5	178677750	178677832	178677800	178677822
21	xxx-m0046-3p	+	-30.6	AGACGCGACCTCAGATCAGACGT	23	5	8258053	8258138	8258106	8258128
21	xxx-m0051-5p	+	-51.3	CCGCCGCGGCGGCCGTCGGGTGGG	24	5	8439484	8439555	8439494	8439517
6	xxx-m0069-5p	+	-27.4	TCCCGGCGAAGAGAAGAGACACA	23	5	43785479	43785560	43785489	43785511
7	xxx-m0074-3p	-	-23.6	TCTCGGACAAGCTGTAGGTCCT	22	5	139044088	139044167	139044098	139044119
9	xxx-m0076-5p	+	-54.5	GTCTGGGCCAACCCTTCCATGGGT	24	5	35561621	35561721	35561631	35561654
10	xxx-m0003-5p	-	-18.27	AAAGAGGAACAGCTCTTTACCTT	23	4	5534853	5534938	5534906	5534928
12	xxx-m0008-5p	+	-34.6	TTGGTTTTGTTTGGGTTTGTT	21	4	95308414	95308489	95308424	95308444
12	xxx-m0011-5p	-	-26.2	GCACGTTCGTGGGGAACCTGG	21	4	127165951	127166046	127166016	127166036
14	xxx-m0014-5p	+	-25.5	GAAGTTGCCCGTGTTTTTTTCG	22	4	101031987	101032063	101031997	101032018
15	xxx-m0015-5p	+	-28	CGTGGCGTCCCGGTAGCTCGC	21	4	45201122	45201195	45201132	45201152
1	xxx-m0033-5p	+	-23.4	GTGAGGTTGTAGGTTGTTTGGTTT	24	4	20295844	20295943	20295854	20295877
1	xxx-m0035-3p	+	-28.8	ATTAGCTCCCTCTTCCCATGTTCT	24	4	204996315	204996397	204996364	204996387
1	xxx-m0036-3p	+	-27.6	AGCACCTTGCCTGCGGGCTTTC	22	4	248873848	248873927	248873896	248873917
1	xxx-m0038-3p	-	-44.8	TCTTGTAGCAGGTATTTTCCCTG	23	4	117854800	117854890	117854810	117854832
20	xxx-m0041-5p	+	-43.4	GCCCGCGAGGGGTCGCCGCCC	21	4	63520862	63520946	63520872	63520892
21	xxx-m0045-5p	+	-52.9	GCCCCGGGCCCTCGACCGGACCGG	24	4	8253310	8253406	8253320	8253343
21	xxx-m0050-5p	+	-62.2	CTCGGCGGCGTCGCGGCGGGTCT	23	4	8439060	8439144	8439070	8439092
21	xxx-m0053-3p	+	-39.6	GCTCCGGCGCTGCGTCTCCAGGC	23	4	36699126	36699211	36699179	36699201
22	xxx-m0056-5p	+	-42.93	GGAGCAGGCTCCGGGGGACAGGG	23	4	35335659	35335740	35335669	35335691
22	xxx-m0058-3p	+	-57.7	GCAAGGCCGGGCCTGGCGGGG	21	4	46113607	46113700	46113670	46113690
2	xxx-m0062-3p	-	-26.3	TACAGAAGACTGCACATTTGTAT	23	4	132893839	132893938	132893849	132893871
5	xxx-m0067-5p	-	-25.5	CCCACTGCTTCACTTGACTAACC	23	4	79170179	79170270	79170238	79170260
7	xxx-m0073-5p	-	-30.7	AAAAGAGATGCGGTAGCAGCTG	22	4	92608574	92608650	92608619	92608640
7	xxx-m0074-5p	-	-23.6	AATTACAGATTGTCTCAGAGAA	22	4	139044088	139044167	139044136	139044157
8	xxx-m0075-5p	-	-30.2	TCACCGACTCTGCCCGTCCCAGGT	24	4	143930248	143930330	143930297	143930320
10	xxx-m0001-3p	+	-58.4	GTCCGCGGCGGGGCGCGGGG	20	3	21534880	21534956	21534927	21534946
10	xxx-m0002-3p	+	-44.2	ACGGGCGCGCGGGGTCTCTCCGCG	24	3	102643662	102643743	102643710	102643733
11	xxx-m0004-5p	+	-37.6	AAAAGTGTAGAGACTTTGGAACCA	24	3	95925389	95925475	95925399	95925422
11	xxx-m0005-3p	+	-41	GGACGCTCAGGAGGACTCTTCC	22	3	123194126	123194205	123194174	123194195
11	xxx-m0006-5p	-	-43.3	CCCCGGGGCCGGGGGCGGAG	20	3	381524	381616	381587	381606
11	xxx-m0007-3p	-	-41.8	CAAAAATAGGAAGTCCAAGGACTG	24	3	58504605	58504690	58504615	58504638
12	xxx-m0010-5p	-	-43.6	TCTGGCTCCTTTCTAATCACTAT	23	3	80906562	80906641	80906609	80906631
14	xxx-m0013-5p	+	-39	GAGGGGTCTCTGCCTCTACCC	21	3	100875030	100875107	100875040	100875060
15	xxx-m0016-3p	-	-34.8	GTGCACGTGAGGATGGCTCTGAGA	24	3	25705921	25706007	25705931	25705954
17	xxx-m0019-3p	+	-19.51	CTCTGAAGCAACAGGATCTGAGG	23	3	2674216	2674299	2674267	2674289
17	xxx-m0020-5p	+	-60.5	GCCCGGGCGGGCGCCGGCCGCT	22	3	4997950	4998048	4997960	4997981
17	xxx-m0021-5p	+	-38.8	GTGACAGAGCGAGACCGTGTCTC	23	3	58895777	58895875	58895787	58895809
17	xxx-m0022-3p	-	-48.8	CGGCCTCGCGGACCCTGCGCCTG	23	3	5438864	5438956	5438874	5438896
18	xxx-m0027-5p	-	-55.4	ATGGCCGCCCCCGCTCGCACCGC	23	3	5295429	5295517	5295485	5295507
19	xxx-m0028-3p	+	-40.3	CTCACGGCTGTGCCTCCCACAGC	23	3	804466	804542	804510	804532
19	xxx-m0029-3p	+	-38	GCCCGGCGCCGGGGGCGGCG	20	3	38975703	38975773	38975744	38975763
21	xxx-m0042-5p	+	-59.1	CCCCGGGGCTCGCGAGGCGGTTCT	24	3	8207973	8208060	8207983	8208006
21	xxx-m0049-3p	+	-49.5	GCGCGTGACTCCCTCCGCCGCGAG	24	3	8390736	8390814	8390781	8390804
21	xxx-m0052-3p	+	-50	GTCGGGCGGGCGGTCGGGCCGGC	23	3	8441010	8441109	8441077	8441099
22	xxx-m0055-3p	+	-45.5	CTAGTTTTATATTTTTGAGCCCT	23	3	17707387	17707467	17707435	17707457
22	xxx-m0057-5p	+	-48	GAGGGGCGGCGGCGGCGGCGGC	22	3	37746299	37746375	37746309	37746330
3	xxx-m0063-3p	+	-25.4	CACCCAGGCTGGACTGCAATGGC	23	3	196159594	196159682	196159650	196159672
3	xxx-m0064-3p	-	-55.3	CCCGGCGGCGGGCCGGGGCGAG	22	3	48446888	48446978	48446898	48446919
4	xxx-m0066-3p	+	-48.7	GCCCCGGGGCCGCGGGGGCG	20	3	186144924	186145005	186144976	186144995
5	xxx-m0068-5p	-	-20.8	AAGGATGTGGATCTCCAAATAA	22	3	173315092	173315168	173315137	173315158
7	xxx-m0072-5p	+	-19.3	TTAGAGAGAAAGAGAACTACT	21	3	101138246	101138342	101138256	101138276
9	xxx-m0079-5p	+	-40.5	ACTAGGTCGGTGCAAAAGTCATC	23	3	132945695	132945787	132945705	132945727
9	xxx-m0080-3p	-	-34.12	CCCCGCGGCGGCGGCGGCGCCA	22	3	72364828	72364907	72364838	72364859
21	xxx-m0050-3p	+	-62.2	CCTCCTCCCCGCCGGGGCCCGTCGTC	26	1	8439060	8439144	8439109	8439134
5	xxx-m0068-3p	-	-20.8	TATTTTGAGCTCTGCATCTTAAC	23	1	173315092	173315168	173315102	173315124

## Sheet: Sample 2
Chromosome	miRNA ID	Strand	MFE	Sequence	Mature miRNA length	Read Count	Precursor Start	Precursor End	Mature Start	Mature End
21	xxx-m0087-3p	+	-63.15	TCCCCCGCGGGGGCGCGCCGGCGT	24	633	8442118	8442210	8442177	8442200
1	xxx-m0057-3p	+	-32.9	AAGTAAGCCGTTTTAAAAACTGTT	24	346	248874251	248874351	248874318	248874341
21	xxx-m0085-5p	+	-36.1	GTCCCGCGGGGCCCGAAGCGTT	22	234	8437644	8437734	8437654	8437675
21	xxx-m0080-3p	+	-59.3	TCCCCCGCGGGGGCGCGCCGGCG	23	187	8259090	8259174	8259142	8259164
1	xxx-m0059-5p	-	-27.8	TCTCTCCCCGACACCTCCAGCCC	23	99	29584540	29584639	29584607	29584629
10	xxx-m0007-3p	-	-39.9	CACCGCGGTCTTTTCCTCCCACTC	24	29	114174098	114174190	114174108	114174131
2	xxx-m0100-5p	-	-42.2	GTCCCCAGACTCTCCCGGGCTGTG	24	29	17753263	17753340	17753307	17753330
2	xxx-m0103-5p	-	-29.5	ATTCCCACTGTCCCTACCTACTTA	24	23	132279721	132279817	132279784	132279807
21	xxx-m0074-5p	+	-35.9	GCCCGTGGACGGTGTGAGGCCGG	23	22	8214096	8214163	8214106	8214128
10	xxx-m0006-3p	-	-45.6	AAGAGCTCTCTGACTTCGCCTCCT	24	15	102227064	102227148	102227074	102227097
2	xxx-m0096-3p	+	-43.9	GTCAGTCCCCAGCACCTCCAAGA	23	15	120374897	120374995	120374963	120374985
1	xxx-m0065-3p	-	-34.6	ACCGGGTGCTGTAGGCTTTTTC	22	14	228637081	228637169	228637091	228637112
21	xxx-m0079-5p	+	-45.7	CTCCTCCCCGGAGGGGGCGGGCT	23	14	8258675	8258758	8258685	8258707
21	xxx-m0083-3p	+	-63.5	CCCCGCCGCGCGCCGGGACCGGGG	24	14	8401681	8401783	8401750	8401773
12	xxx-m0015-5p	+	-23.6	CTCCCCGACACCATGGCCCTGGC	23	12	62603658	62603733	62603668	62603690
22	xxx-m0094-3p	-	-46.8	CCCCCGCGGGGGCCCGGGGCC	21	12	38089448	38089536	38089458	38089478
2	xxx-m0097-3p	+	-37.1	GACATGATGAGCTTTGTGCAAAA	23	12	188974444	188974519	188974487	188974509
19	xxx-m0048-3p	-	-61.8	TGACTGTCCTATGTCTTTCCTTC	23	11	40282544	40282641	40282554	40282576
21	xxx-m0075-3p	+	-61	CACGCCTCCTCCCCTCCTCCCGCC	24	11	8216017	8216115	8216082	8216105
21	xxx-m0076-5p	+	-29.3	CGACGACCCATTCGAACGTCTGCCCT	26	11	8254164	8254236	8254174	8254199
21	xxx-m0083-5p	+	-63.5	TCCCCGCCGGCGGGCCGCCCCCCCCC	26	11	8401681	8401783	8401691	8401716
22	xxx-m0092-3p	+	-42.3	CTCAGCCTGTGGACATGCCCACC	23	11	47092553	47092634	47092602	47092624
7	xxx-m0120-5p	-	-23.6	AATTACAGATTGTCTCAGAGAAAACA	26	11	139044088	139044167	139044132	139044157
12	xxx-m0021-5p	-	-43.6	TCTGGCTCCTTTCTAATCACTAT	23	10	80906562	80906641	80906609	80906631
13	xxx-m0023-3p	-	-44.3	TTAGTGACTCAGAATATTCTCATT	24	10	78182880	78182964	78182890	78182913
16	xxx-m0033-5p	-	-18.1	TAAGCACTGCCTTTGAACCTGAT	23	10	58559859	58559942	58559910	58559932
17	xxx-m0040-3p	-	-38.2	CGCCTGTCTCATTCTCTGCAGGT	23	10	43830096	43830188	43830106	43830128
22	xxx-m0090-3p	+	-45.5	CTAGTTTTATATTTTTGAGCCCT	23	10	17707387	17707467	17707435	17707457
12	xxx-m0014-3p	+	-26.2	TTAGTACTTGGAAGGGAGACTGAC	24	9	34205721	34205803	34205770	34205793
14	xxx-m0029-5p	+	-29	ATCTTGTTAAAAAGCAGATTCT	22	9	101048665	101048742	101048675	101048696
2	xxx-m0099-3p	-	-47.8	CCCGCGGGGCCCGGAGCGGCA	21	9	10080130	10080227	10080140	10080160
3	xxx-m0108-3p	-	-26.7	ACCGGGTGCTGTAGGCTTTTGGCC	24	9	51694448	51694533	51694458	51694481
9	xxx-m0127-5p	-	-57.4	AGAGCAAAGAACCTGAGTGCCTGT	24	9	39679628	39679713	39679680	39679703
10	xxx-m0005-5p	-	-18.27	AAAGAGGAACAGCTCTTTACCTT	23	8	5534853	5534938	5534906	5534928
1	xxx-m0067-3p	-	-60.1	GCGCGCGCGCGGGAGGGCGGGCA	23	8	234610229	234610320	234610239	234610261
3	xxx-m0107-3p	+	-63	GGAATTATAACTCGGTGCTCTGTC	24	8	190182721	190182811	190182778	190182801
7	xxx-m0120-3p	-	-23.6	TCTCGGACAAGCTGTAGGTCCT	22	8	139044088	139044167	139044098	139044119
11	xxx-m0011-5p	-	-23.7	CCCGCGGGGGAGGGGAAGAGGTGA	24	7	45876611	45876687	45876654	45876677
13	xxx-m0022-3p	+	-52.2	ATATGTGCCTAGTGGCTGCTGTCT	24	7	26685323	26685409	26685376	26685399
1	xxx-m0054-3p	+	-52.5	TAGTCCATTTCAAGTTAACTCTGT	24	7	178677750	178677832	178677799	178677822
1	xxx-m0061-3p	-	-44.8	TCTTGTAGCAGGTATTTTCCCTGG	24	7	117854799	117854891	117854809	117854832
21	xxx-m0076-3p	+	-29.3	CTTTCGATGGTAGTCGCCGTGC	22	7	8254164	8254236	8254205	8254226
21	xxx-m0086-5p	+	-65.4	CTCGGCGGCGTCGCGGCGGGTCT	23	7	8439060	8439158	8439070	8439092
21	xxx-m0077-5p	+	-39.35	CCGCCGCGCGCTTCCCTCCGCAC	23	6	8255731	8255815	8255741	8255763
22	xxx-m0093-5p	-	-31.8	TGTCCTCCCTCTGCTCGCAGCTCC	24	6	20431935	20432018	20431985	20432008
2	xxx-m0101-3p	-	-22.3	GCATTCAGTTGGGCACTCCTC	21	6	27369152	27369224	27369162	27369182
3	xxx-m0109-5p	-	-29.9	GAGAGATCAGAGGCGCAGAGTG	22	6	120084564	120084645	120084614	120084635
8	xxx-m0123-3p	+	-39.9	GACCGGTGAGGACTCTCCCG	20	6	144374059	144374132	144374103	144374122
8	xxx-m0124-3p	-	-30.5	AAAGGATTGGCTCTGAGGGCAGCA	24	6	10696286	10696380	10696296	10696319
10	xxx-m0003-3p	+	-50.4	GCTGACCGGACTGGCCCTGCTCC	23	5	80132731	80132815	80132783	80132805
14	xxx-m0028-5p	+	-25.5	GAAGTTGCCCGTGTTTTTTTCGCT	24	5	101031987	101032063	101031997	101032020
14	xxx-m0030-3p	-	-37.46	CTTGCTCTGCTCTCCCTTGTACTT	24	5	95533796	95533881	95533806	95533829
1	xxx-m0060-5p	-	-38	ACGGGTATTCTTGGGTGGATAATA	24	5	98046082	98046159	98046126	98046149
1	xxx-m0063-3p	-	-47.7	AGAATCTGTTGGTAAAGCCTCTCT	24	5	221813941	221814029	221813951	221813974
3	xxx-m0106-3p	+	-29	GCCCCGCGGGGGCTCCCGTGA	21	5	183428099	183428182	183428152	183428172
3	xxx-m0107-5p	+	-63	GAAAGAGCACTGAGTTATAATGCCA	25	5	190182721	190182811	190182731	190182755
10	xxx-m0001-5p	+	-55.9	CTGGCTGGCTGCTCCGGGCACT	22	4	43471227	43471306	43471237	43471258
10	xxx-m0002-3p	+	-26.4	CAGCTGGTGTTGAATCAGGGCA	22	4	47011868	47011937	47011906	47011927
12	xxx-m0013-3p	+	-22.4	GGCTGGTCTTCGCTGGACACC	21	4	31754651	31754729	31754699	31754719
12	xxx-m0018-5p	+	-34.6	TTGGTTTTGTTTGGGTTTGTT	21	4	95308414	95308489	95308424	95308444
14	xxx-m0025-5p	+	-33	TTGAGCTCCTTGAGGGCAAGGACT	24	4	92337297	92337365	92337307	92337330
17	xxx-m0039-5p	-	-33.3	AGAGACGGTAGCACCTGCGGGG	22	4	43241065	43241150	43241119	43241140
19	xxx-m0044-5p	+	-40.1	TGCGCCACTGGAGCTCCGGCC	21	4	39412237	39412327	39412247	39412267
19	xxx-m0047-3p	-	-43.6	CACTGCCTCTGTGCCCTGGACCG	23	4	19626745	19626826	19626755	19626777
19	xxx-m0052-5p	-	-41.6	CCCGGGGAGCCCCGCGGGGC	20	4	55484182	55484254	55484225	55484244
1	xxx-m0062-3p	-	-34.1	CAGGGCTGGGAGGGAGTGGGA	21	4	153613061	153613151	153613071	153613091
1	xxx-m0064-3p	-	-41.9	ACCACCCTGAACGCGCCCGAT	21	4	228625985	228626082	228625995	228626015
1	xxx-m0066-3p	-	-32.9	AATACCGGGTGCTGTAGGCTTTT	23	4	228646027	228646111	228646037	228646059
20	xxx-m0068-3p	+	-41.4	GTTATGATCCCCACCAGCGGTTC	23	4	653581	653677	653645	653667
20	xxx-m0069-3p	+	-28.9	CTGCCCGGCGGTGTGCGGCCACAT	24	4	17505503	17505588	17505555	17505578
20	xxx-m0070-5p	+	-49.7	GCCCGGCGGCGGGGCCGGCGC	21	4	34363712	34363787	34363722	34363742
21	xxx-m0081-5p	+	-61.9	GATCCCGCCGGGCCGGGCCCG	21	4	8390684	8390771	8390694	8390714
21	xxx-m0082-5p	+	-63.1	CTCGCGGCGCGTCGGCCGGGGCCG	24	4	8396443	8396530	8396453	8396476
21	xxx-m0088-5p	+	-39.6	TCCCGCGGGGGCGGGGAGGGGCG	23	4	44261938	44262019	44261948	44261970
21	xxx-m0089-3p	-	-56.8	CCCGCGGGGGGAGGGGGAAGG	21	4	8212860	8212937	8212870	8212890
22	xxx-m0091-5p	+	-42.93	GGAGCAGGCTCCGGGGGACA	20	4	35335659	35335740	35335669	35335688
2	xxx-m0098-5p	+	-27.8	GACACCGGACAGCTCTGATCTGT	23	4	231190348	231190436	231190358	231190380
2	xxx-m0102-3p	-	-30.1	ATCAGTTCCTAATGCATTGCCTT	23	4	55982972	55983056	55982982	55983004
3	xxx-m0104-3p	+	-28.9	GCTACTCTTTGCACCCCTCTGCT	23	4	37970680	37970758	37970726	37970748
4	xxx-m0110-5p	+	-25.3	GGCACGTTCGTGGGGAACCTGACA	24	4	75886406	75886502	75886416	75886439
7	xxx-m0116-3p	+	-29.2	CTTGGCAGAGAGCTCTTAGTAAC	23	4	41699192	41699268	41699236	41699258
7	xxx-m0118-3p	-	-40.5	TCTGTACCCTCACCTCACCCAGG	23	4	1498543	1498641	1498553	1498575
7	xxx-m0119-5p	-	-30.7	AAAAGAGATGCGGTAGCAGCTGCC	24	4	92608574	92608650	92608617	92608640
8	xxx-m0125-3p	-	-35	TCTGCCCTGCTTCTCCCTAGGT	22	4	23298936	23299017	23298946	23298967
10	xxx-m0004-5p	+	-37.1	TTCCGGACTCCTCTGGGGCC	20	3	110497457	110497534	110497467	110497486
10	xxx-m0008-5p	-	-43.1	TGAGCCGGCTGAGCAGGAAGCGGC	24	3	119542550	119542632	119542599	119542622
11	xxx-m0009-3p	+	-43.2	ATATATATGTTGTGTATGTATACG	24	3	44233126	44233214	44233181	44233204
11	xxx-m0010-3p	+	-42.1	GCCTCCCGGACCAGGGCTTCCA	22	3	120336414	120336489	120336458	120336479
12	xxx-m0012-3p	+	-62.9	AATGCATGCTGGGCTTGTAACCT	23	3	11250732	11250811	11250779	11250801
12	xxx-m0016-5p	+	-18.5	AAAAGTAGTCTGCAAATTGAAT	22	3	66736847	66736942	66736857	66736878
12	xxx-m0017-5p	+	-39.7	TATGTGTATGTGTATGTGTGTAA	23	3	76774265	76774341	76774275	76774297
12	xxx-m0019-3p	+	-28.9	GTTTCCTTTCTGCTCTGACCTGA	23	3	96445949	96446030	96445998	96446020
12	xxx-m0020-5p	+	-43.4	CCCCGCTCTCCCGAAGCTGTTCG	23	3	110468745	110468821	110468755	110468777
13	xxx-m0023-5p	-	-44.3	AGAACATTCTGAGTCACTAACTC	23	3	78182880	78182964	78182932	78182954
13	xxx-m0024-3p	-	-27.1	CAAGTTGGAAATCTAGTCTTCTT	23	3	79631398	79631476	79631408	79631430
14	xxx-m0026-5p	+	-20.8	ATGAGATGAAGCATGTAGCTCC	22	3	97772561	97772641	97772571	97772592
14	xxx-m0027-3p	+	-38.4	GTTGTCCTGCTTGTCCTGCGAGG	23	3	100880937	100881035	100881003	100881025
16	xxx-m0031-3p	+	-41	GTAGAAACTTTACCTGATCCT	21	3	13948594	13948671	13948641	13948661
16	xxx-m0032-3p	+	-51.2	GAGCTCCCGGAGCGGCCTGGCC	22	3	14911443	14911540	14911509	14911530
17	xxx-m0034-3p	+	-25.1	ATAAAAACAGGCTCTCGCTCTGT	23	3	38886870	38886948	38886916	38886938
17	xxx-m0035-3p	+	-31	CCCCGGGAGGATGCCCGGCCT	21	3	40453060	40453149	40453119	40453139
17	xxx-m0036-3p	+	-49.6	CCGGGGCTCCGCTGGGGGCGACT	23	3	43246097	43246190	43246158	43246180
17	xxx-m0037-5p	+	-38.8	GTGACAGAGCGAGACCGTGTCTC	23	3	58895777	58895875	58895787	58895809
17	xxx-m0038-3p	+	-19.2	AAATTTAAAATAAATTACTGGACT	24	3	59694692	59694769	59694736	59694759
17	xxx-m0041-3p	-	-45.2	TGAGCCCCGGCCCCAGGGAAGA	22	3	62703832	62703918	62703842	62703863
17	xxx-m0042-5p	-	-48.7	CGCCCACGTGCGGGCCCGGAGCT	23	3	63446419	63446489	63446457	63446479
17	xxx-m0043-3p	-	-29.2	TGTGCCCCGGGTCAGACTCTGTC	23	3	82692472	82692555	82692482	82692504
19	xxx-m0045-3p	+	-25.5	CTCTAGAATCTGCAATTCAAAAGT	24	3	41260966	41261062	41261029	41261052
19	xxx-m0046-3p	-	-60.1	CCCGCCGCCCTGTGCCCGCAGT	22	3	1011653	1011743	1011663	1011684
19	xxx-m0049-3p	-	-49.8	TCTGTCCTGCCCTGCTTCCCAGTG	24	3	40670009	40670103	40670019	40670042
19	xxx-m0050-3p	-	-50.6	TGGGCTCGGGCCGCTCGCCTTG	22	3	47048565	47048662	47048575	47048596
19	xxx-m0051-5p	-	-25.2	TGTCCCTGTTTGGGCGCCAC	20	3	51971800	51971873	51971844	51971863
1	xxx-m0053-5p	+	-23.4	GTGAGGTTGTAGGTTGTTTGGTT	23	3	20295844	20295943	20295854	20295876
1	xxx-m0055-3p	+	-28.8	ATTAGCTCCCTCTTCCCATGTTCT	24	3	204996315	204996397	204996364	204996387
1	xxx-m0056-3p	+	-27.6	AAGCACCTTGCCTGCGGGCTTTC	23	3	248873848	248873927	248873895	248873917
1	xxx-m0058-3p	-	-37.9	CTTCAGCTGCAGAACTCTCAGTC	23	3	23429549	23429634	23429559	23429581
20	xxx-m0071-5p	-	-44.9	TGCAGACTCTTGGTTTCCACCCCC	24	3	35453975	35454067	35454034	35454057
20	xxx-m0072-3p	-	-37	AGGAGGATCGCTTCAGTCCAGGA	23	3	49798301	49798400	49798311	49798333
21	xxx-m0073-5p	+	-42.8	CTAGGGCGTCTCGAGGGTCGGGGG	24	3	8211987	8212074	8211997	8212020
21	xxx-m0078-3p	+	-50	GTCGGGCGGGCGGTCGGGCCG	21	3	8257973	8258070	8258040	8258060
21	xxx-m0084-3p	+	-66.9	GCCCCGGGCCCTCGACCGGACCGG	24	3	8436311	8436387	8436354	8436377
2	xxx-m0095-3p	+	-35.6	TCGCCTACAAGCAGTCGGAGCG	22	3	97995807	97995898	97995867	97995888
3	xxx-m0105-5p	+	-39.9	TTCAAGGACCTCCTGGGATACCCG	24	3	99794808	99794896	99794818	99794841
5	xxx-m0111-3p	+	-50.3	GCCCCGCGGGGGCGGCGCGTG	21	3	6713907	6713992	6713962	6713982
5	xxx-m0112-5p	+	-39.5	TAGCGAGACCTCAACTCTACAAT	23	3	154685778	154685857	154685788	154685810
5	xxx-m0113-5p	-	-36.5	CGCGACCCAGAGAGACTCTGCC	22	3	83473374	83473459	83473428	83473449
5	xxx-m0114-3p	-	-46	GGCCGGAGGACCTGGAGCTGTCTG	24	3	159099129	159099215	159099139	159099162
6	xxx-m0115-3p	-	-23.1	CCCGCATTCTCCAGTTTTAT	20	3	26571847	26571920	26571857	26571876
7	xxx-m0117-5p	+	-34.3	GTTCGAGATGCGCCTGGACAACA	23	3	65771361	65771456	65771371	65771393
7	xxx-m0121-3p	-	-56.4	TCGGGCCCCAGATGGCCGGCGGCG	24	3	150379024	150379115	150379034	150379057
8	xxx-m0122-5p	+	-47.1	CTGGGCTGCGTCAGGCTGAGCCCA	24	3	106270212	106270297	106270222	106270245
9	xxx-m0126-5p	+	-32.3	GTCGTGCGGAGGATCCTGTAT	21	3	133449819	133449909	133449829	133449849
9	xxx-m0128-3p	-	-51.2	TCCGCGGCCCTCTCCTGTGCGAG	23	3	98056540	98056619	98056550	98056572
9	xxx-m0129-3p	-	-41.79	CCCGCCGGGCCCCGCGGGGTGA	22	3	129482811	129482909	129482821	129482842
21	xxx-m0074-3p	+	-35.9	GCCCCCGGCGCGCCGGGCCC	20	2	8214096	8214163	8214134	8214153
21	xxx-m0084-5p	+	-66.9	CGCCGGCGGGGCTCGGAGCCGGGC	24	2	8436311	8436387	8436321	8436344
13	xxx-m0022-5p	+	-52.2	GAGAGTAGCCACTAGCCACATGT	23	1	26685323	26685409	26685333	26685355
21	xxx-m0075-5p	+	-61	GTGCGTCGGAGGGCGGCGGCGGCGGC	26	1	8216017	8216115	8216023	8216048
21	xxx-m0080-5p	+	-59.3	CCCGGCGCCCACCCCCGCGGGG	22	1	8259090	8259174	8259100	8259121
21	xxx-m0082-3p	+	-63.1	GCCCGGCCGCGCCCGTGGCCGCGGC	25	1	8396443	8396530	8396496	8396520
21	xxx-m0085-3p	+	-36.1	CAGGCCCGAGCCGCCTGGATA	21	1	8437644	8437734	8437704	8437724
21	xxx-m0087-5p	+	-63.15	CCCGGCGCCCACCCCCGCGGGGAATC	26	1	8442118	8442210	8442135	8442160

## Sheet: Sample 3
Chromosome	miRNA ID	Strand	MFE	Sequence	Mature miRNA length	Read Count	Precursor Start	Precursor End	Mature Start	Mature End
1	xxx-m0028-3p	+	-32.9	AAGTAAGCCGTTTTAAAAACTGTT	24	145	248874251	248874351	248874318	248874341
6	xxx-m0062-3p	-	-29.8	ATGAGAGCGCTCGGTTTTTTGTGC	24	32	28981639	28981738	28981649	28981672
22	xxx-m0043-3p	-	-49.2	CCCCGCGGGGGCCCGGGGCCTC	22	28	38089446	38089531	38089456	38089477
10	xxx-m0004-3p	-	-39.9	CACCGCGGTCTTTTCCTCCCACTC	24	20	114174098	114174190	114174108	114174131
2	xxx-m0049-5p	-	-42.2	GTCCCCAGACTCTCCCGGGCTGTG	24	18	17753263	17753340	17753307	17753330
2	xxx-m0045-3p	+	-51	TACAACTCAGGGGCCAGGCACCAT	24	16	109253956	109254038	109254005	109254028
19	xxx-m0025-5p	+	-52.4	TTTAGTGGCTCCCTCTGCCTGCAG	24	13	57439100	57439182	57439110	57439133
21	xxx-m0038-3p	+	-29.6	CTTTCGATGGTAGTCGCCGTGCCT	24	13	8254158	8254238	8254205	8254228
10	xxx-m0001-5p	+	-55.9	CTGGCTGGCTGCTCCGGGCACTGG	24	12	43471227	43471306	43471237	43471260
10	xxx-m0003-5p	-	-18.27	AAAGAGGAACAGCTCTTTACCTT	23	12	5534853	5534938	5534906	5534928
17	xxx-m0023-5p	-	-31.5	TTGATGATCGTTCTTCTCTCCGT	23	11	19190012	19190099	19190067	19190089
12	xxx-m0012-5p	+	-34.7	TTTGGTTTTGTTTGGGTTTGTT	22	10	95308413	95308489	95308423	95308444
1	xxx-m0027-3p	+	-52.5	AGTCCATTTCAAGTTAACTCTGT	23	10	178677750	178677832	178677800	178677822
21	xxx-m0039-3p	+	-63.5	CCCCGCCGCGCGCCGGGACCGGGG	24	10	8401681	8401783	8401750	8401773
22	xxx-m0040-5p	+	-42.93	GGAGCAGGCTCCGGGGGACAGGGA	24	10	35335659	35335740	35335669	35335692
8	xxx-m0067-5p	-	-30.2	TCACCGACTCTGCCCGTCCCAGGT	24	9	143930248	143930330	143930297	143930320
1	xxx-m0029-5p	-	-38	ACGGGTATTCTTGGGTGGATAATA	24	8	98046082	98046159	98046126	98046149
21	xxx-m0037-5p	+	-52.9	GCCCCGGGCCCTCGACCGGACCGG	24	8	8253310	8253406	8253320	8253343
21	xxx-m0039-5p	+	-63.5	TCCCCGCCGGCGGGCCGCCCCCCCCC	26	8	8401681	8401783	8401691	8401716
MT	xxx-m0073-5p	+	-20.7	CAAAGTATTTAGCTGACTCGCCA	23	8	6847	6932	6857	6879
11	xxx-m0008-3p	-	-36.6	AAAAGGGGGCTGAGGTGGAGGAAG	24	7	122152089	122152169	122152099	122152122
12	xxx-m0013-3p	+	-28.9	GTTTCCTTTCTGCTCTGACCTGAC	24	7	96445948	96446031	96445998	96446021
14	xxx-m0019-5p	+	-29	ATCTTGTTAAAAAGCAGATTCT	22	7	101048665	101048742	101048675	101048696
16	xxx-m0020-5p	-	-18.1	TAAGCACTGCCTTTGAACCTGA	22	7	58559859	58559942	58559911	58559932
1	xxx-m0030-3p	-	-44.8	TCTTGTAGCAGGTATTTTCCCTG	23	7	117854800	117854890	117854810	117854832
21	xxx-m0036-5p	+	-54.6	CCCCCCCGGCCCCGTCCGCCCC	22	7	8217308	8217399	8217318	8217339
5	xxx-m0058-3p	-	-43.8	TCGCCGCTTTCTGGGCTCGCTCAC	24	7	108748624	108748701	108748634	108748657
12	xxx-m0011-5p	+	-23.6	CTCCCCGACACCATGGCCCTGGC	23	6	62603658	62603733	62603668	62603690
1	xxx-m0032-3p	-	-47.4	AGAATCTGTTGGTAAAGCCTCTC	23	6	221813942	221814026	221813952	221813974
3	xxx-m0055-5p	-	-23.8	GTCCATTTTACAGAGCGCTGATTG	24	6	67888249	67888335	67888302	67888325
5	xxx-m0059-3p	-	-46.2	CAAAAATTGTAATTACTTTGGCAC	24	6	151105873	151105956	151105883	151105906
6	xxx-m0061-5p	+	-38.7	ATATGTGTGTGTGCTTGTATATA	23	6	142013651	142013732	142013661	142013683
7	xxx-m0064-3p	-	-40.5	TCTGTACCCTCACCTCACCCAGG	23	6	1498543	1498641	1498553	1498575
9	xxx-m0071-3p	-	-18.8	ATCCCTGAAAGTATAGTCTTAGGT	24	6	88374255	88374352	88374265	88374288
12	xxx-m0014-5p	-	-43.6	TCTGGCTCCTTTCTAATCACTA	22	5	80906562	80906641	80906610	80906631
1	xxx-m0033-5p	-	-33.01	ACCGGGTGCTGTAGGCTTTTTCTT	24	5	228630323	228630416	228630383	228630406
21	xxx-m0035-5p	+	-57	CGCGTCCCGGTCGCCGCGGTTCG	23	5	8213245	8213328	8213255	8213277
22	xxx-m0041-3p	+	-42.3	CTCAGCCTGTGGACATGCCCACC	23	5	47092553	47092634	47092602	47092624
2	xxx-m0054-5p	-	-40.6	GTCATTTTTGTGATCTGCAGCTAG	24	5	219294116	219294195	219294162	219294185
3	xxx-m0056-5p	-	-29.9	GAGAGATCAGAGGCGCAGAGTG	22	5	120084564	120084645	120084614	120084635
10	xxx-m0002-3p	+	-44.2	ACGGGCGCGCGGGGTCTCTCCGCG	24	4	102643662	102643743	102643710	102643733
12	xxx-m0015-3p	-	-62.8	TAGGTCACTGGGGTCAGAGCCAGC	24	4	107747313	107747391	107747323	107747346
14	xxx-m0018-5p	+	-25.5	GAAGTTGCCCGTGTTTTTTTCGCT	24	4	101031987	101032063	101031997	101032020
17	xxx-m0021-3p	+	-51.2	GTGTCCCGGCCCGGAGCCGCCA	22	4	17836417	17836499	17836468	17836489
17	xxx-m0022-3p	+	-25.1	ATAAAAACAGGCTCTCGCTCTGT	23	4	38886870	38886948	38886916	38886938
1	xxx-m0031-3p	-	-46.9	CTCTCCTAACCTCGCTCTCGCGG	23	4	182391703	182391802	182391713	182391735
2	xxx-m0046-3p	+	-36.8	GACATGATGAGCTTTGTGCAAAA	23	4	188974446	188974519	188974487	188974509
2	xxx-m0047-5p	+	-80.9	TACAGGATGCAGTGCTCAGTGATC	24	4	203261495	203261593	203261505	203261528
4	xxx-m0057-3p	-	-19.9	CTCCATTCTGAGCTTCTTTCTG	22	4	137664209	137664301	137664219	137664240
6	xxx-m0060-3p	+	-36.6	TACCGGGTGCTGTAGGCTTACTTT	24	4	4428005	4428097	4428064	4428087
10	xxx-m0005-5p	-	-26	CCCGGCGGAGGGTCCGGCAGG	21	3	133105210	133105277	133105247	133105267
11	xxx-m0006-5p	-	-32.8	GTGCCTCCAGGCGCAGGGCA	20	3	568122	568200	568171	568190
11	xxx-m0007-3p	-	-51.9	CCCGCCGCACCTCCTCCTGCA	21	3	68042639	68042732	68042649	68042669
12	xxx-m0009-3p	+	-62.9	AATGCATGCTGGGCTTGTAACCT	23	3	11250732	11250811	11250779	11250801
12	xxx-m0010-5p	+	-41.4	CTCAGGATTTAAAGGGGCACTC	22	3	12888660	12888740	12888670	12888691
13	xxx-m0016-3p	-	-43.6	TTCCTTTGAAAAGATTGTCTTTCA	24	3	31750262	31750355	31750272	31750295
14	xxx-m0017-5p	+	-41.6	GCCGCTCTGGGCCCGACCCCGGC	23	3	55580585	55580662	55580595	55580617
18	xxx-m0024-5p	+	-22.3	CACCTTAGAAGGTCTCACTGGT	22	3	63106680	63106747	63106690	63106711
1	xxx-m0026-3p	+	-35.5	GTGTAACCCGCTGTCCCCGCAGA	23	3	961562	961639	961607	961629
20	xxx-m0034-5p	-	-19.3	AAGCAGCAAGTAAATAATTGTGA	23	3	10251083	10251168	10251136	10251158
22	xxx-m0042-5p	-	-31.8	TGTCCTCCCTCTGCTCGCAGCTC	23	3	20431935	20432018	20431986	20432008
2	xxx-m0044-5p	+	-23.7	CTCTGAGCCTCCTTGTCGCCTGC	23	3	101002663	101002749	101002673	101002695
2	xxx-m0048-5p	+	-51.7	GTAGCTGTGGCAGCTGCACCACCT	24	3	227599040	227599122	227599050	227599073
2	xxx-m0050-3p	-	-31	CAGTTCAATGGTGTTCAGCAGAC	23	3	74539305	74539395	74539315	74539337
2	xxx-m0051-5p	-	-29.5	ATTCCCACTGTCCCTACCTACTT	23	3	132279721	132279817	132279785	132279807
2	xxx-m0052-5p	-	-50.8	ATTCAGCTACGATCACCAGGGCAT	24	3	132913076	132913156	132913123	132913146
2	xxx-m0053-3p	-	-31.6	TAGATTGAAGCCAGTTGATTAG	22	3	211778049	211778141	211778059	211778080
7	xxx-m0063-5p	+	-34.4	TCCCCTCCTGGCTGGCTCGCCA	22	3	64999309	64999389	64999319	64999340
7	xxx-m0065-5p	-	-35.9	GGCGGCGGCGGGGGGAGAGGAA	22	3	120857889	120857987	120857956	120857977
8	xxx-m0066-5p	+	-44	TCCAGCGAGGGGCGCCCGGGG	21	3	142799618	142799693	142799628	142799648
9	xxx-m0068-5p	+	-54.5	GTCTGGGCCAACCCTTCCATGGGT	24	3	35561621	35561721	35561631	35561654
9	xxx-m0069-5p	+	-43.4	CATGTTCATGGACTGAAAGACTT	23	3	114045801	114045880	114045811	114045833
9	xxx-m0070-5p	+	-57.5	GTTCTCCGTGGCCCTCCAGCGCCT	24	3	129495919	129496019	129495929	129495952
9	xxx-m0072-3p	-	-48.1	CCCCGCCGCGCGCCGGGCCGG	21	3	133121171	133121249	133121181	133121201
MT	xxx-m0074-3p	-	-23.02	TATTGACCCAGCGATGGGGGCTTC	24	3	11413	11496	11423	11446
5	xxx-m0058-5p	-	-43.8	TGCGGGCCCTGGGAGTGGAGAC	22	2	108748624	108748701	108748670	108748691
11	xxx-m0008-5p	-	-36.6	TCTTCCCCTTAGTTTCCTTTAAG	23	1	122152089	122152169	122152137	122152159
21	xxx-m0035-3p	+	-57	GCCCGGCGTCCGGCCGACCGCC	22	1	8213245	8213328	8213297	8213318
21	xxx-m0038-5p	+	-29.6	GCGGCGACGACCCATTCGAACGTC	24	1	8254158	8254238	8254170	8254193
2	xxx-m0046-5p	+	-36.8	TTTGCACAAAGAGTCTCATGTCT	23	1	188974446	188974519	188974456	188974478
2	xxx-m0047-3p	+	-80.9	TCACTGCGCACTGCATCCTGTAG	23	1	203261495	203261593	203261561	203261583
