# Supplementary material for: Unravelling microRNA regulation and miRNA–mRNA regulatory networks in osteogenesis driven by 3D nanotopographical cues
Source: Royal Society of Chemistry journal article supplement (doi:10.1039/d3bm01597a), 2023-12-21
Supplement: d3bm01597a8.xlsx [file d3bm01597a8.xlsx]

## Sheet: ReadMe
Sample 1: Cells in 2D, Growth medium
Sample 2: Cells in 2D, Osteogenic medium
Sample 3: Cells in 3D, Growth medium
Description of worksheets:
ReadMe	Current Sheet
*	Coexpression of miRNA and its targets across different condition
Description of columns in the GO worksheets
miRNA (Subject)	miRNAs from miRBase Database
Control Expression	miRNA expression in Control
Treated Expression	miRNA expression in Treatment
FoldChange	Fold change of expression value
log2FoldChange*	Log value of fold change
P Value	P Value of expression
Regulation	UP / DOWN / NEUTRAL
Gene_Symbol	Gene symbol
Control Expression	Gene expression in Control
Treated Expression	Gene expression in Treatment
log2FoldChange	Log value of fold change
P Value	P Value of expression
Regulation	UP / DOWN / NEUTRAL

## Sheet: 1_VS_2
miRNA (Subject)	Control Expression	Treated Expression	FoldChange	log2FoldChange*	P Value	Regulation	Gene_Symbol	Control Expression	Treated Expression	log2FoldChange	P Value	Regulation
hsa-miR-4466	12.8452	21.4087	1.66667	0.736966	0.567146	NEUTRAL	ACKR1,CADM3	0.156752	507.252	11.66	0.165413	UP
hsa-miR-4466	12.8452	21.4087	1.66667	0.736966	0.567146	NEUTRAL	ACKR1,CADM3	0.156752	507.252	11.66	0.165413	UP
hsa-miR-4466	12.8452	21.4087	1.66667	0.736966	0.567146	NEUTRAL	ACKR1,CADM3	0.156752	507.252	11.66	0.165413	UP
hsa-miR-23a-5p	110.936	95.0547	0.856842	-0.222899	0.824966	NEUTRAL	ACKR1,CADM3	0.156752	507.252	11.66	0.165413	UP
hsa-miR-23a-5p	110.936	95.0547	0.856842	-0.222899	0.824966	NEUTRAL	ACKR1,CADM3	0.156752	507.252	11.66	0.165413	UP
hsa-miR-4508	179.833	108.756	0.604762	-0.725561	0.439635	NEUTRAL	ACKR1,CADM3	0.156752	507.252	11.66	0.165413	UP
hsa-miR-4508	179.833	108.756	0.604762	-0.725561	0.439635	NEUTRAL	ACKR1,CADM3	0.156752	507.252	11.66	0.165413	UP
hsa-miR-665	35.0325	53.95	1.54	0.62293	0.564592	NEUTRAL	GGT5	0.318963	54.4987	7.41669	0.0253622	UP
hsa-miR-330-5p	65.3939	89.9166	1.375	0.459432	0.651801	NEUTRAL	GGT5	0.318963	54.4987	7.41669	0.0253622	UP
hsa-miR-330-5p	65.3939	89.9166	1.375	0.459432	0.651801	NEUTRAL	GGT5	0.318963	54.4987	7.41669	0.0253622	UP
hsa-miR-330-5p	65.3939	89.9166	1.375	0.459432	0.651801	NEUTRAL	GGT5	0.318963	54.4987	7.41669	0.0253622	UP
hsa-miR-330-5p	65.3939	89.9166	1.375	0.459432	0.651801	NEUTRAL	GGT5	0.318963	54.4987	7.41669	0.0253622	UP
hsa-miR-6842-3p	3.50325	8.56349	2.44444	1.28951	0.444061	UP	OLAH	0.02853	4.68406	7.35914	0.42305	UP
hsa-miR-6842-3p	3.50325	8.56349	2.44444	1.28951	0.444061	UP	OLAH	0.02853	4.68406	7.35914	0.42305	UP
hsa-miR-6842-3p	3.50325	8.56349	2.44444	1.28951	0.444061	UP	OLAH	0.02853	4.68406	7.35914	0.42305	UP
hsa-miR-6842-3p	3.50325	8.56349	2.44444	1.28951	0.444061	UP	OLAH	0.02853	4.68406	7.35914	0.42305	UP
hsa-miR-6842-3p	3.50325	8.56349	2.44444	1.28951	0.444061	UP	OLAH	0.02853	4.68406	7.35914	0.42305	UP
hsa-miR-6842-3p	3.50325	8.56349	2.44444	1.28951	0.444061	UP	OLAH	0.02853	4.68406	7.35914	0.42305	UP
hsa-miR-143-5p	290.769	466.71	1.60509	0.682652	0.432676	NEUTRAL	LEP	0.0779011	11.7309	7.23445	0.857712	UP
hsa-miR-134-3p	8.17424	11.1325	1.3619	0.445626	0.8105	NEUTRAL	LEP	0.0779011	11.7309	7.23445	0.857712	UP
hsa-miR-339-5p	39.7034	39.392	0.992157	-0.0113599	1	NEUTRAL	SUSD2	0.208763	27.6731	7.05048	0.0644964	UP
hsa-miR-339-5p	39.7034	39.392	0.992157	-0.0113599	1	NEUTRAL	SUSD2	0.208763	27.6731	7.05048	0.0644964	UP
hsa-miR-1285-3p	119.11	183.259	1.53856	0.621583	0.508504	NEUTRAL	FMO3	0.0226214	2.64359	6.86867	0.560098	UP
hsa-miR-149-5p	416.886	306.573	0.735387	-0.443423	0.61018	NEUTRAL	FMO3	0.0226214	2.64359	6.86867	0.560098	UP
hsa-miR-1268b	72.4004	113.038	1.56129	0.642739	0.51546	NEUTRAL	C5AR1	0.019695	1.90261	6.59401	0.99965	UP
hsa-miR-671-5p	58.3874	71.077	1.21733	0.283724	0.792222	NEUTRAL	PF4V1	0.237315	20.2884	6.41771	0.99965	UP
hsa-miR-30b-3p	18.684	14.5579	0.779167	-0.359996	0.806338	NEUTRAL	PF4V1	0.237315	20.2884	6.41771	0.99965	UP
hsa-miR-1303	1.16775	8.56349	7.33333	2.87447	0.128943	UP	AC008132.13	0.00785912	0.572091	6.18573	0.99965	UP
hsa-miR-874-3p	168.156	259.474	1.54306	0.62579	0.491682	NEUTRAL	AC008132.13	0.00785912	0.572091	6.18573	0.99965	UP
hsa-miR-197-3p	700.649	721.046	1.02911	0.0413988	0.963335	NEUTRAL	AC008132.13	0.00785912	0.572091	6.18573	0.99965	UP
hsa-miR-1304-3p	161.149	160.994	0.999034	-0.00139458	1	NEUTRAL	AC008132.13	0.00785912	0.572091	6.18573	0.99965	UP
hsa-miR-3909	429.731	447.014	1.04022	0.0568851	0.95088	NEUTRAL	LSP1	0.481538	34.6266	6.16809	0.0191329	UP
hsa-miR-3909	429.731	447.014	1.04022	0.0568851	0.95088	NEUTRAL	LSP1	0.481538	34.6266	6.16809	0.0191329	UP
hsa-miR-3909	429.731	447.014	1.04022	0.0568851	0.95088	NEUTRAL	LSP1	0.481538	34.6266	6.16809	0.0191329	UP
hsa-miR-3909	429.731	447.014	1.04022	0.0568851	0.95088	NEUTRAL	LSP1	0.481538	34.6266	6.16809	0.0191329	UP
hsa-miR-3909	429.731	447.014	1.04022	0.0568851	0.95088	NEUTRAL	LSP1	0.481538	34.6266	6.16809	0.0191329	UP
hsa-miR-3909	429.731	447.014	1.04022	0.0568851	0.95088	NEUTRAL	LSP1	0.481538	34.6266	6.16809	0.0191329	UP
hsa-miR-3909	429.731	447.014	1.04022	0.0568851	0.95088	NEUTRAL	LSP1	0.481538	34.6266	6.16809	0.0191329	UP
hsa-miR-3909	429.731	447.014	1.04022	0.0568851	0.95088	NEUTRAL	LSP1	0.481538	34.6266	6.16809	0.0191329	UP
hsa-miR-3909	429.731	447.014	1.04022	0.0568851	0.95088	NEUTRAL	LSP1	0.481538	34.6266	6.16809	0.0191329	UP
hsa-miR-3909	429.731	447.014	1.04022	0.0568851	0.95088	NEUTRAL	LSP1	0.481538	34.6266	6.16809	0.0191329	UP
hsa-miR-3909	429.731	447.014	1.04022	0.0568851	0.95088	NEUTRAL	LSP1	0.481538	34.6266	6.16809	0.0191329	UP
hsa-miR-3909	429.731	447.014	1.04022	0.0568851	0.95088	NEUTRAL	LSP1	0.481538	34.6266	6.16809	0.0191329	UP
hsa-miR-941	1125.71	1156.07	1.02697	0.0383954	0.965034	NEUTRAL	LSP1	0.481538	34.6266	6.16809	0.0191329	UP
hsa-miR-6852-5p	15.1807	12.8452	0.846154	-0.241008	0.903482	NEUTRAL	LSP1	0.481538	34.6266	6.16809	0.0191329	UP
hsa-miR-1303	1.16775	8.56349	7.33333	2.87447	0.128943	UP	MYO1F	0.010221	0.725754	6.14987	0.0363525	UP
hsa-miR-3677-3p	7.00649	22.2651	3.17778	1.66802	0.197722	UP	MYO1F	0.010221	0.725754	6.14987	0.0363525	UP
hsa-miR-3677-3p	7.00649	22.2651	3.17778	1.66802	0.197722	UP	MYO1F	0.010221	0.725754	6.14987	0.0363525	UP
hsa-miR-3677-3p	7.00649	22.2651	3.17778	1.66802	0.197722	UP	MYO1F	0.010221	0.725754	6.14987	0.0363525	UP
hsa-miR-3677-3p	7.00649	22.2651	3.17778	1.66802	0.197722	UP	MYO1F	0.010221	0.725754	6.14987	0.0363525	UP
hsa-miR-1304-3p	161.149	160.994	0.999034	-0.00139458	1	NEUTRAL	MYO1F	0.010221	0.725754	6.14987	0.0363525	UP
hsa-miR-6852-5p	15.1807	12.8452	0.846154	-0.241008	0.903482	NEUTRAL	MYO1F	0.010221	0.725754	6.14987	0.0363525	UP
hsa-miR-328-3p	142.465	68.5079	0.480874	-1.05627	0.275341	DOWN	MYO1F	0.010221	0.725754	6.14987	0.0363525	UP
hsa-miR-328-3p	142.465	68.5079	0.480874	-1.05627	0.275341	DOWN	MYO1F	0.010221	0.725754	6.14987	0.0363525	UP
hsa-miR-328-3p	142.465	68.5079	0.480874	-1.05627	0.275341	DOWN	MYO1F	0.010221	0.725754	6.14987	0.0363525	UP
hsa-miR-146b-3p	18.684	72.7897	3.89583	1.96193	0.0710823	UP	POM121L9P	0.0529253	2.93342	5.79248	0.510442	UP
hsa-miR-1304-3p	161.149	160.994	0.999034	-0.00139458	1	NEUTRAL	POM121L9P	0.0529253	2.93342	5.79248	0.510442	UP
hsa-miR-1469	1.16775	8.56349	7.33333	2.87447	0.128943	UP	IGF2,INS,INS-IGF2	12.9254	654.164	5.66137	0.0106919	UP
hsa-miR-2277-5p	36.2002	58.2317	1.6086	0.685808	0.520897	NEUTRAL	IGF2,INS,INS-IGF2	12.9254	654.164	5.66137	0.0106919	UP
hsa-miR-1268b	72.4004	113.038	1.56129	0.642739	0.51546	NEUTRAL	IGF2,INS,INS-IGF2	12.9254	654.164	5.66137	0.0106919	UP
hsa-miR-1268b	72.4004	113.038	1.56129	0.642739	0.51546	NEUTRAL	IGF2,INS,INS-IGF2	12.9254	654.164	5.66137	0.0106919	UP
hsa-miR-665	35.0325	53.95	1.54	0.62293	0.564592	NEUTRAL	IGF2,INS,INS-IGF2	12.9254	654.164	5.66137	0.0106919	UP
hsa-miR-665	35.0325	53.95	1.54	0.62293	0.564592	NEUTRAL	IGF2,INS,INS-IGF2	12.9254	654.164	5.66137	0.0106919	UP
hsa-miR-665	35.0325	53.95	1.54	0.62293	0.564592	NEUTRAL	IGF2,INS,INS-IGF2	12.9254	654.164	5.66137	0.0106919	UP
hsa-miR-665	35.0325	53.95	1.54	0.62293	0.564592	NEUTRAL	IGF2,INS,INS-IGF2	12.9254	654.164	5.66137	0.0106919	UP
hsa-miR-296-5p	16.3485	24.8341	1.51905	0.603167	0.631192	NEUTRAL	IGF2,INS,INS-IGF2	12.9254	654.164	5.66137	0.0106919	UP
hsa-miR-296-5p	16.3485	24.8341	1.51905	0.603167	0.631192	NEUTRAL	IGF2,INS,INS-IGF2	12.9254	654.164	5.66137	0.0106919	UP
hsa-miR-296-5p	16.3485	24.8341	1.51905	0.603167	0.631192	NEUTRAL	IGF2,INS,INS-IGF2	12.9254	654.164	5.66137	0.0106919	UP
hsa-miR-210-5p	343.318	101.049	0.294331	-1.76449	0.0554073	DOWN	IGF2,INS,INS-IGF2	12.9254	654.164	5.66137	0.0106919	UP
hsa-miR-210-5p	343.318	101.049	0.294331	-1.76449	0.0554073	DOWN	IGF2,INS,INS-IGF2	12.9254	654.164	5.66137	0.0106919	UP
hsa-miR-874-5p	15.1807	30.8286	2.03077	1.02203	0.386358	UP	KCNK15	0.0173647	0.863782	5.63644	0.99965	UP
hsa-miR-4466	12.8452	21.4087	1.66667	0.736966	0.567146	NEUTRAL	KCNK15	0.0173647	0.863782	5.63644	0.99965	UP
hsa-miR-30c-1-3p	42.0389	42.8174	1.01852	0.0264722	1	NEUTRAL	KCNK15	0.0173647	0.863782	5.63644	0.99965	UP
hsa-miR-4508	179.833	108.756	0.604762	-0.725561	0.439635	NEUTRAL	KCNK15	0.0173647	0.863782	5.63644	0.99965	UP
hsa-miR-3656	741.52	10.2762	0.0138583	-6.17311	2.11383e-08	DOWN	KCNK15	0.0173647	0.863782	5.63644	0.99965	UP
hsa-miR-4516	15.1807	63.3698	4.17436	2.06155	0.0638169	UP	MYO16	0.0143164	0.656791	5.5197	0.796824	UP
hsa-miR-4516	15.1807	63.3698	4.17436	2.06155	0.0638169	UP	MYO16	0.0143164	0.656791	5.5197	0.796824	UP
hsa-miR-4516	15.1807	63.3698	4.17436	2.06155	0.0638169	UP	MYO16	0.0143164	0.656791	5.5197	0.796824	UP
hsa-miR-708-5p	418.054	175.552	0.419926	-1.25179	0.159186	DOWN	MYO16	0.0143164	0.656791	5.5197	0.796824	UP
hsa-miR-708-5p	418.054	175.552	0.419926	-1.25179	0.159186	DOWN	MYO16	0.0143164	0.656791	5.5197	0.796824	UP
hsa-miR-708-5p	418.054	175.552	0.419926	-1.25179	0.159186	DOWN	MYO16	0.0143164	0.656791	5.5197	0.796824	UP
hsa-miR-708-5p	418.054	175.552	0.419926	-1.25179	0.159186	DOWN	MYO16	0.0143164	0.656791	5.5197	0.796824	UP
hsa-miR-708-5p	418.054	175.552	0.419926	-1.25179	0.159186	DOWN	MYO16	0.0143164	0.656791	5.5197	0.796824	UP
hsa-miR-708-5p	418.054	175.552	0.419926	-1.25179	0.159186	DOWN	MYO16	0.0143164	0.656791	5.5197	0.796824	UP
hsa-miR-4532	44613.8	18135.8	0.406505	-1.29865	0.174811	DOWN	MYO16	0.0143164	0.656791	5.5197	0.796824	UP
hsa-miR-4532	44613.8	18135.8	0.406505	-1.29865	0.174811	DOWN	MYO16	0.0143164	0.656791	5.5197	0.796824	UP
hsa-miR-4532	44613.8	18135.8	0.406505	-1.29865	0.174811	DOWN	MYO16	0.0143164	0.656791	5.5197	0.796824	UP
hsa-miR-21-3p	25555	40742.5	1.59431	0.672929	0.480334	NEUTRAL	TMTC1	0.331141	14.9261	5.49424	0.0106919	UP
hsa-miR-21-3p	25555	40742.5	1.59431	0.672929	0.480334	NEUTRAL	TMTC1	0.331141	14.9261	5.49424	0.0106919	UP
hsa-miR-665	35.0325	53.95	1.54	0.62293	0.564592	NEUTRAL	TMTC1	0.331141	14.9261	5.49424	0.0106919	UP
hsa-miR-1285-3p	119.11	183.259	1.53856	0.621583	0.508504	NEUTRAL	TMTC1	0.331141	14.9261	5.49424	0.0106919	UP
hsa-miR-1296-5p	254.569	327.125	1.28502	0.361786	0.684707	NEUTRAL	TMTC1	0.331141	14.9261	5.49424	0.0106919	UP
hsa-miR-4488	3253.35	2433.74	0.748074	-0.418748	0.612634	NEUTRAL	TMTC1	0.331141	14.9261	5.49424	0.0106919	UP
hsa-miR-2277-5p	36.2002	58.2317	1.6086	0.685808	0.520897	NEUTRAL	TIMP4	0.0854058	3.61347	5.40291	0.99965	UP
hsa-miR-330-5p	65.3939	89.9166	1.375	0.459432	0.651801	NEUTRAL	VIT	0.090799	3.70493	5.35063	0.395136	UP
hsa-miR-330-5p	65.3939	89.9166	1.375	0.459432	0.651801	NEUTRAL	VIT	0.090799	3.70493	5.35063	0.395136	UP
hsa-miR-330-5p	65.3939	89.9166	1.375	0.459432	0.651801	NEUTRAL	VIT	0.090799	3.70493	5.35063	0.395136	UP
hsa-miR-330-5p	65.3939	89.9166	1.375	0.459432	0.651801	NEUTRAL	VIT	0.090799	3.70493	5.35063	0.395136	UP
hsa-miR-330-5p	65.3939	89.9166	1.375	0.459432	0.651801	NEUTRAL	VIT	0.090799	3.70493	5.35063	0.395136	UP
hsa-miR-330-5p	65.3939	89.9166	1.375	0.459432	0.651801	NEUTRAL	VIT	0.090799	3.70493	5.35063	0.395136	UP
hsa-miR-665	35.0325	53.95	1.54	0.62293	0.564592	NEUTRAL	MAOA	0.104178	4.24843	5.3498	0.42305	UP
hsa-miR-665	35.0325	53.95	1.54	0.62293	0.564592	NEUTRAL	MAOA	0.104178	4.24843	5.3498	0.42305	UP
hsa-miR-4454	51.3809	77.9277	1.51667	0.600904	0.560022	NEUTRAL	MAOA	0.104178	4.24843	5.3498	0.42305	UP
hsa-miR-4532	44613.8	18135.8	0.406505	-1.29865	0.174811	DOWN	MAOA	0.104178	4.24843	5.3498	0.42305	UP
hsa-miR-4532	44613.8	18135.8	0.406505	-1.29865	0.174811	DOWN	MAOA	0.104178	4.24843	5.3498	0.42305	UP
hsa-miR-17-3p	73.5682	108.756	1.47831	0.563946	0.569995	NEUTRAL	IRAK3	0.0152427	0.57865	5.2465	0.99965	UP
hsa-miR-192-5p	1163.08	1634.77	1.40556	0.49114	0.553197	NEUTRAL	IRAK3	0.0152427	0.57865	5.2465	0.99965	UP
hsa-miR-532-3p	1.16775	20.5524	17.6	4.1375	0.0150138	UP	CORIN	0.203094	7.37265	5.18196	0.0106919	UP
hsa-miR-1304-3p	161.149	160.994	0.999034	-0.00139458	1	NEUTRAL	CORIN	0.203094	7.37265	5.18196	0.0106919	UP
hsa-miR-1469	1.16775	8.56349	7.33333	2.87447	0.128943	UP	PPP1R14A	1.38282	45.3602	5.03575	0.236215	UP
hsa-miR-1469	1.16775	8.56349	7.33333	2.87447	0.128943	UP	PPP1R14A	1.38282	45.3602	5.03575	0.236215	UP
hsa-miR-1469	1.16775	8.56349	7.33333	2.87447	0.128943	UP	PPP1R14A	1.38282	45.3602	5.03575	0.236215	UP
hsa-miR-1469	1.16775	8.56349	7.33333	2.87447	0.128943	UP	PPP1R14A	1.38282	45.3602	5.03575	0.236215	UP
hsa-miR-33b-3p	4.67099	8.56349	1.83333	0.874469	0.618247	NEUTRAL	LAMP3	0.0653171	2.13768	5.03244	0.679427	UP
hsa-miR-33b-3p	4.67099	8.56349	1.83333	0.874469	0.618247	NEUTRAL	LAMP3	0.0653171	2.13768	5.03244	0.679427	UP
hsa-miR-1304-3p	161.149	160.994	0.999034	-0.00139458	1	NEUTRAL	CCL5	0.0763908	2.32503	4.92771	0.99965	UP
hsa-miR-1304-3p	161.149	160.994	0.999034	-0.00139458	1	NEUTRAL	CCL5	0.0763908	2.32503	4.92771	0.99965	UP
hsa-miR-1304-3p	161.149	160.994	0.999034	-0.00139458	1	NEUTRAL	CCL5	0.0763908	2.32503	4.92771	0.99965	UP
hsa-miR-1304-3p	161.149	160.994	0.999034	-0.00139458	1	NEUTRAL	CCL5	0.0763908	2.32503	4.92771	0.99965	UP
hsa-miR-330-5p	65.3939	89.9166	1.375	0.459432	0.651801	NEUTRAL	NRCAM	0.789427	22.8618	4.85599	0.0106919	UP
hsa-miR-615-3p	228.879	602.013	2.63027	1.39521	0.110374	UP	PPM1H	3.85139	96.1916	4.64246	0.99965	UP
hsa-miR-665	35.0325	53.95	1.54	0.62293	0.564592	NEUTRAL	PPM1H	3.85139	96.1916	4.64246	0.99965	UP
hsa-miR-5787	12.8452	12.8452	1	0	1	NEUTRAL	HECW1	0.0207774	0.500525	4.59035	0.75777	UP
hsa-miR-5787	12.8452	12.8452	1	0	1	NEUTRAL	HECW1	0.0207774	0.500525	4.59035	0.75777	UP
hsa-miR-6852-5p	15.1807	12.8452	0.846154	-0.241008	0.903482	NEUTRAL	HECW1	0.0207774	0.500525	4.59035	0.75777	UP
hsa-miR-6852-5p	15.1807	12.8452	0.846154	-0.241008	0.903482	NEUTRAL	HECW1	0.0207774	0.500525	4.59035	0.75777	UP
hsa-miR-766-3p	12.8452	10.2762	0.8	-0.321928	0.865138	NEUTRAL	HECW1	0.0207774	0.500525	4.59035	0.75777	UP
hsa-miR-940	5.83874	15.4143	2.64	1.40054	0.31347	UP	EPHB6	0.173787	4.0071	4.52716	0.0878315	UP
hsa-miR-2277-3p	8.17424	12.8452	1.57143	0.652077	0.672249	NEUTRAL	EPHB6	0.173787	4.0071	4.52716	0.0878315	UP
hsa-miR-2277-3p	8.17424	12.8452	1.57143	0.652077	0.672249	NEUTRAL	EPHB6	0.173787	4.0071	4.52716	0.0878315	UP
hsa-miR-2277-3p	8.17424	12.8452	1.57143	0.652077	0.672249	NEUTRAL	EPHB6	0.173787	4.0071	4.52716	0.0878315	UP
hsa-miR-2277-3p	8.17424	12.8452	1.57143	0.652077	0.672249	NEUTRAL	EPHB6	0.173787	4.0071	4.52716	0.0878315	UP
hsa-miR-2277-3p	8.17424	12.8452	1.57143	0.652077	0.672249	NEUTRAL	EPHB6	0.173787	4.0071	4.52716	0.0878315	UP
hsa-miR-6131	101.594	80.4968	0.792337	-0.335814	0.737715	NEUTRAL	EPHB6	0.173787	4.0071	4.52716	0.0878315	UP
hsa-miR-6131	101.594	80.4968	0.792337	-0.335814	0.737715	NEUTRAL	EPHB6	0.173787	4.0071	4.52716	0.0878315	UP
hsa-miR-6131	101.594	80.4968	0.792337	-0.335814	0.737715	NEUTRAL	EPHB6	0.173787	4.0071	4.52716	0.0878315	UP
hsa-miR-6131	101.594	80.4968	0.792337	-0.335814	0.737715	NEUTRAL	EPHB6	0.173787	4.0071	4.52716	0.0878315	UP
hsa-miR-6131	101.594	80.4968	0.792337	-0.335814	0.737715	NEUTRAL	EPHB6	0.173787	4.0071	4.52716	0.0878315	UP
hsa-miR-328-3p	142.465	68.5079	0.480874	-1.05627	0.275341	DOWN	EPHB6	0.173787	4.0071	4.52716	0.0878315	UP
hsa-miR-93-3p	37.3679	16.2706	0.435417	-1.19953	0.287475	DOWN	EPHB6	0.173787	4.0071	4.52716	0.0878315	UP
hsa-miR-93-3p	37.3679	16.2706	0.435417	-1.19953	0.287475	DOWN	EPHB6	0.173787	4.0071	4.52716	0.0878315	UP
hsa-miR-93-3p	37.3679	16.2706	0.435417	-1.19953	0.287475	DOWN	EPHB6	0.173787	4.0071	4.52716	0.0878315	UP
hsa-miR-93-3p	37.3679	16.2706	0.435417	-1.19953	0.287475	DOWN	EPHB6	0.173787	4.0071	4.52716	0.0878315	UP
hsa-miR-93-3p	37.3679	16.2706	0.435417	-1.19953	0.287475	DOWN	EPHB6	0.173787	4.0071	4.52716	0.0878315	UP
hsa-miR-93-3p	37.3679	16.2706	0.435417	-1.19953	0.287475	DOWN	EPHB6	0.173787	4.0071	4.52716	0.0878315	UP
hsa-miR-93-3p	37.3679	16.2706	0.435417	-1.19953	0.287475	DOWN	EPHB6	0.173787	4.0071	4.52716	0.0878315	UP
hsa-miR-1469	1.16775	8.56349	7.33333	2.87447	0.128943	UP	KLF15	0.0701734	1.57086	4.48449	0.876025	UP
hsa-miR-3176	14.013	26.5468	1.89444	0.921775	0.44803	NEUTRAL	KLF15	0.0701734	1.57086	4.48449	0.876025	UP
hsa-miR-3176	14.013	26.5468	1.89444	0.921775	0.44803	NEUTRAL	KLF15	0.0701734	1.57086	4.48449	0.876025	UP
hsa-miR-665	35.0325	53.95	1.54	0.62293	0.564592	NEUTRAL	KLF15	0.0701734	1.57086	4.48449	0.876025	UP
hsa-miR-296-5p	16.3485	24.8341	1.51905	0.603167	0.631192	NEUTRAL	KLF15	0.0701734	1.57086	4.48449	0.876025	UP
hsa-miR-370-3p	175.162	376.793	2.15111	1.10508	0.216401	UP	CRISPLD2	4.03502	88.1295	4.44898	0.0106919	UP
hsa-miR-370-3p	175.162	376.793	2.15111	1.10508	0.216401	UP	CRISPLD2	4.03502	88.1295	4.44898	0.0106919	UP
hsa-miR-370-3p	175.162	376.793	2.15111	1.10508	0.216401	UP	CRISPLD2	4.03502	88.1295	4.44898	0.0106919	UP
hsa-miR-370-3p	175.162	376.793	2.15111	1.10508	0.216401	UP	CRISPLD2	4.03502	88.1295	4.44898	0.0106919	UP
hsa-miR-370-3p	175.162	376.793	2.15111	1.10508	0.216401	UP	CRISPLD2	4.03502	88.1295	4.44898	0.0106919	UP
hsa-miR-1285-3p	119.11	183.259	1.53856	0.621583	0.508504	NEUTRAL	CRISPLD2	4.03502	88.1295	4.44898	0.0106919	UP
hsa-miR-214-3p	1193.44	669.665	0.561122	-0.833614	0.317743	NEUTRAL	CRISPLD2	4.03502	88.1295	4.44898	0.0106919	UP
hsa-miR-214-3p	1193.44	669.665	0.561122	-0.833614	0.317743	NEUTRAL	CRISPLD2	4.03502	88.1295	4.44898	0.0106919	UP
hsa-miR-214-3p	1193.44	669.665	0.561122	-0.833614	0.317743	NEUTRAL	CRISPLD2	4.03502	88.1295	4.44898	0.0106919	UP
hsa-miR-214-3p	1193.44	669.665	0.561122	-0.833614	0.317743	NEUTRAL	CRISPLD2	4.03502	88.1295	4.44898	0.0106919	UP
hsa-miR-214-3p	1193.44	669.665	0.561122	-0.833614	0.317743	NEUTRAL	CRISPLD2	4.03502	88.1295	4.44898	0.0106919	UP
hsa-miR-214-3p	1193.44	669.665	0.561122	-0.833614	0.317743	NEUTRAL	CRISPLD2	4.03502	88.1295	4.44898	0.0106919	UP
hsa-miR-214-3p	1193.44	669.665	0.561122	-0.833614	0.317743	NEUTRAL	CRISPLD2	4.03502	88.1295	4.44898	0.0106919	UP
hsa-miR-214-3p	1193.44	669.665	0.561122	-0.833614	0.317743	NEUTRAL	CRISPLD2	4.03502	88.1295	4.44898	0.0106919	UP
hsa-miR-4532	44613.8	18135.8	0.406505	-1.29865	0.174811	DOWN	FKBP5	2.4892	53.4366	4.42408	0.0106919	UP
hsa-miR-214-5p	597.887	493.257	0.825	-0.277534	0.743819	NEUTRAL	TMPRSS9	0.024404	0.47985	4.29739	0.99965	UP
hsa-miR-654-5p	45.5422	35.9667	0.789744	-0.340544	0.764433	NEUTRAL	TMPRSS9	0.024404	0.47985	4.29739	0.99965	UP
hsa-miR-654-5p	45.5422	35.9667	0.789744	-0.340544	0.764433	NEUTRAL	TMPRSS9	0.024404	0.47985	4.29739	0.99965	UP
hsa-miR-654-5p	45.5422	35.9667	0.789744	-0.340544	0.764433	NEUTRAL	TMPRSS9	0.024404	0.47985	4.29739	0.99965	UP
hsa-miR-1469	1.16775	8.56349	7.33333	2.87447	0.128943	UP	CPM	2.43666	46.5172	4.25479	0.357526	UP
hsa-miR-1469	1.16775	8.56349	7.33333	2.87447	0.128943	UP	CPM	2.43666	46.5172	4.25479	0.357526	UP
hsa-miR-1469	1.16775	8.56349	7.33333	2.87447	0.128943	UP	CPM	2.43666	46.5172	4.25479	0.357526	UP
hsa-miR-188-5p	7.00649	8.56349	1.22222	0.289507	0.938956	NEUTRAL	CPM	2.43666	46.5172	4.25479	0.357526	UP
hsa-miR-188-5p	7.00649	8.56349	1.22222	0.289507	0.938956	NEUTRAL	CPM	2.43666	46.5172	4.25479	0.357526	UP
hsa-miR-188-5p	7.00649	8.56349	1.22222	0.289507	0.938956	NEUTRAL	CPM	2.43666	46.5172	4.25479	0.357526	UP
hsa-miR-188-5p	7.00649	8.56349	1.22222	0.289507	0.938956	NEUTRAL	CPM	2.43666	46.5172	4.25479	0.357526	UP
hsa-miR-188-5p	7.00649	8.56349	1.22222	0.289507	0.938956	NEUTRAL	CPM	2.43666	46.5172	4.25479	0.357526	UP
hsa-miR-188-5p	7.00649	8.56349	1.22222	0.289507	0.938956	NEUTRAL	CPM	2.43666	46.5172	4.25479	0.357526	UP
hsa-miR-188-5p	7.00649	8.56349	1.22222	0.289507	0.938956	NEUTRAL	CPM	2.43666	46.5172	4.25479	0.357526	UP
hsa-miR-188-5p	7.00649	8.56349	1.22222	0.289507	0.938956	NEUTRAL	CPM	2.43666	46.5172	4.25479	0.357526	UP
hsa-miR-188-5p	7.00649	8.56349	1.22222	0.289507	0.938956	NEUTRAL	CPM	2.43666	46.5172	4.25479	0.357526	UP
hsa-miR-2277-5p	36.2002	58.2317	1.6086	0.685808	0.520897	NEUTRAL	OLFML2A	0.23328	4.41662	4.2428	0.0454406	UP
hsa-miR-330-5p	65.3939	89.9166	1.375	0.459432	0.651801	NEUTRAL	OLFML2A	0.23328	4.41662	4.2428	0.0454406	UP
hsa-miR-330-5p	65.3939	89.9166	1.375	0.459432	0.651801	NEUTRAL	OLFML2A	0.23328	4.41662	4.2428	0.0454406	UP
hsa-miR-589-5p	260.408	341.683	1.31211	0.391886	0.658808	NEUTRAL	PCDH9	0.150883	2.79833	4.21306	0.322842	UP
hsa-miR-320b	10.5097	11.9889	1.14074	0.189971	0.962745	NEUTRAL	PCDH9	0.150883	2.79833	4.21306	0.322842	UP
hsa-miR-1301-3p	18.684	19.696	1.05417	0.076103	1	NEUTRAL	PCDH9	0.150883	2.79833	4.21306	0.322842	UP
hsa-miR-1301-3p	18.684	19.696	1.05417	0.076103	1	NEUTRAL	PCDH9	0.150883	2.79833	4.21306	0.322842	UP
hsa-miR-1301-3p	18.684	19.696	1.05417	0.076103	1	NEUTRAL	PCDH9	0.150883	2.79833	4.21306	0.322842	UP
hsa-miR-320a	2091.44	1600.52	0.765271	-0.385958	0.639358	NEUTRAL	PCDH9	0.150883	2.79833	4.21306	0.322842	UP
hsa-miR-149-5p	416.886	306.573	0.735387	-0.443423	0.61018	NEUTRAL	SECTM1	0.478858	8.51167	4.15177	0.0253622	UP
hsa-miR-149-5p	416.886	306.573	0.735387	-0.443423	0.61018	NEUTRAL	SECTM1	0.478858	8.51167	4.15177	0.0253622	UP
hsa-miR-149-5p	416.886	306.573	0.735387	-0.443423	0.61018	NEUTRAL	SECTM1	0.478858	8.51167	4.15177	0.0253622	UP
hsa-miR-370-3p	175.162	376.793	2.15111	1.10508	0.216401	UP	ESPNL	0.0514886	0.891947	4.11463	0.674203	UP
hsa-miR-370-3p	175.162	376.793	2.15111	1.10508	0.216401	UP	ESPNL	0.0514886	0.891947	4.11463	0.674203	UP
hsa-miR-370-3p	175.162	376.793	2.15111	1.10508	0.216401	UP	ESPNL	0.0514886	0.891947	4.11463	0.674203	UP
hsa-miR-370-3p	175.162	376.793	2.15111	1.10508	0.216401	UP	ESPNL	0.0514886	0.891947	4.11463	0.674203	UP
hsa-miR-370-3p	175.162	376.793	2.15111	1.10508	0.216401	UP	ESPNL	0.0514886	0.891947	4.11463	0.674203	UP
hsa-miR-744-5p	850.121	678.228	0.797802	-0.325897	0.696683	NEUTRAL	ESPNL	0.0514886	0.891947	4.11463	0.674203	UP
hsa-miR-744-5p	850.121	678.228	0.797802	-0.325897	0.696683	NEUTRAL	ESPNL	0.0514886	0.891947	4.11463	0.674203	UP
hsa-miR-744-5p	850.121	678.228	0.797802	-0.325897	0.696683	NEUTRAL	ESPNL	0.0514886	0.891947	4.11463	0.674203	UP
hsa-miR-744-5p	850.121	678.228	0.797802	-0.325897	0.696683	NEUTRAL	ESPNL	0.0514886	0.891947	4.11463	0.674203	UP
hsa-miR-744-5p	850.121	678.228	0.797802	-0.325897	0.696683	NEUTRAL	ESPNL	0.0514886	0.891947	4.11463	0.674203	UP
hsa-miR-431-3p	68.8972	49.6682	0.720904	-0.472121	0.650903	NEUTRAL	ESPNL	0.0514886	0.891947	4.11463	0.674203	UP
hsa-miR-431-3p	68.8972	49.6682	0.720904	-0.472121	0.650903	NEUTRAL	ESPNL	0.0514886	0.891947	4.11463	0.674203	UP
hsa-miR-431-3p	68.8972	49.6682	0.720904	-0.472121	0.650903	NEUTRAL	ESPNL	0.0514886	0.891947	4.11463	0.674203	UP
hsa-miR-431-3p	68.8972	49.6682	0.720904	-0.472121	0.650903	NEUTRAL	ESPNL	0.0514886	0.891947	4.11463	0.674203	UP
hsa-miR-431-3p	68.8972	49.6682	0.720904	-0.472121	0.650903	NEUTRAL	ESPNL	0.0514886	0.891947	4.11463	0.674203	UP
hsa-miR-339-3p	864.134	543.782	0.629279	-0.668228	0.426248	NEUTRAL	ESPNL	0.0514886	0.891947	4.11463	0.674203	UP
hsa-miR-339-3p	864.134	543.782	0.629279	-0.668228	0.426248	NEUTRAL	ESPNL	0.0514886	0.891947	4.11463	0.674203	UP
hsa-miR-339-3p	864.134	543.782	0.629279	-0.668228	0.426248	NEUTRAL	ESPNL	0.0514886	0.891947	4.11463	0.674203	UP
hsa-miR-30c-2-3p	112.104	121.602	1.08472	0.117326	0.912254	NEUTRAL	SPATA20P1	0.310575	5.34439	4.10501	0.99965	UP
hsa-miR-545-3p	1.16775	8.56349	7.33333	2.87447	0.128943	UP	OPHN1	2.10102	33.5509	3.99719	0.99965	UP
hsa-miR-5100	25.6905	35.9667	1.4	0.485427	0.679016	NEUTRAL	OPHN1	2.10102	33.5509	3.99719	0.99965	UP
hsa-miR-940	5.83874	15.4143	2.64	1.40054	0.31347	UP	CILP2	0.197504	3.15388	3.99718	0.160264	UP
hsa-miR-940	5.83874	15.4143	2.64	1.40054	0.31347	UP	CILP2	0.197504	3.15388	3.99718	0.160264	UP
hsa-miR-874-5p	15.1807	30.8286	2.03077	1.02203	0.386358	UP	CILP2	0.197504	3.15388	3.99718	0.160264	UP
hsa-miR-874-5p	15.1807	30.8286	2.03077	1.02203	0.386358	UP	CILP2	0.197504	3.15388	3.99718	0.160264	UP
hsa-miR-3176	14.013	26.5468	1.89444	0.921775	0.44803	NEUTRAL	CILP2	0.197504	3.15388	3.99718	0.160264	UP
hsa-miR-3176	14.013	26.5468	1.89444	0.921775	0.44803	NEUTRAL	CILP2	0.197504	3.15388	3.99718	0.160264	UP
hsa-miR-665	35.0325	53.95	1.54	0.62293	0.564592	NEUTRAL	CILP2	0.197504	3.15388	3.99718	0.160264	UP
hsa-miR-665	35.0325	53.95	1.54	0.62293	0.564592	NEUTRAL	CILP2	0.197504	3.15388	3.99718	0.160264	UP
hsa-miR-4532	44613.8	18135.8	0.406505	-1.29865	0.174811	DOWN	CILP2	0.197504	3.15388	3.99718	0.160264	UP
hsa-miR-4532	44613.8	18135.8	0.406505	-1.29865	0.174811	DOWN	CILP2	0.197504	3.15388	3.99718	0.160264	UP
hsa-miR-210-5p	343.318	101.049	0.294331	-1.76449	0.0554073	DOWN	CILP2	0.197504	3.15388	3.99718	0.160264	UP
hsa-miR-210-5p	343.318	101.049	0.294331	-1.76449	0.0554073	DOWN	CILP2	0.197504	3.15388	3.99718	0.160264	UP
hsa-miR-665	35.0325	53.95	1.54	0.62293	0.564592	NEUTRAL	C5AR2	0.131347	2.01659	3.94046	0.158054	UP
hsa-miR-1469	1.16775	8.56349	7.33333	2.87447	0.128943	UP	CACNA1G	0.0460085	0.684756	3.89562	0.0106919	UP
hsa-miR-1469	1.16775	8.56349	7.33333	2.87447	0.128943	UP	CACNA1G	0.0460085	0.684756	3.89562	0.0106919	UP
hsa-miR-1469	1.16775	8.56349	7.33333	2.87447	0.128943	UP	CACNA1G	0.0460085	0.684756	3.89562	0.0106919	UP
hsa-miR-1303	1.16775	8.56349	7.33333	2.87447	0.128943	UP	CACNA1G	0.0460085	0.684756	3.89562	0.0106919	UP
hsa-miR-652-3p	10.5097	20.5524	1.95556	0.967579	0.452748	NEUTRAL	CACNA1G	0.0460085	0.684756	3.89562	0.0106919	UP
hsa-miR-652-3p	10.5097	20.5524	1.95556	0.967579	0.452748	NEUTRAL	CACNA1G	0.0460085	0.684756	3.89562	0.0106919	UP
hsa-miR-652-3p	10.5097	20.5524	1.95556	0.967579	0.452748	NEUTRAL	CACNA1G	0.0460085	0.684756	3.89562	0.0106919	UP
hsa-miR-652-3p	10.5097	20.5524	1.95556	0.967579	0.452748	NEUTRAL	CACNA1G	0.0460085	0.684756	3.89562	0.0106919	UP
hsa-miR-652-3p	10.5097	20.5524	1.95556	0.967579	0.452748	NEUTRAL	CACNA1G	0.0460085	0.684756	3.89562	0.0106919	UP
hsa-miR-652-3p	10.5097	20.5524	1.95556	0.967579	0.452748	NEUTRAL	CACNA1G	0.0460085	0.684756	3.89562	0.0106919	UP
hsa-miR-652-3p	10.5097	20.5524	1.95556	0.967579	0.452748	NEUTRAL	CACNA1G	0.0460085	0.684756	3.89562	0.0106919	UP
hsa-miR-652-3p	10.5097	20.5524	1.95556	0.967579	0.452748	NEUTRAL	CACNA1G	0.0460085	0.684756	3.89562	0.0106919	UP
hsa-miR-652-3p	10.5097	20.5524	1.95556	0.967579	0.452748	NEUTRAL	CACNA1G	0.0460085	0.684756	3.89562	0.0106919	UP
hsa-miR-652-3p	10.5097	20.5524	1.95556	0.967579	0.452748	NEUTRAL	CACNA1G	0.0460085	0.684756	3.89562	0.0106919	UP
hsa-miR-652-3p	10.5097	20.5524	1.95556	0.967579	0.452748	NEUTRAL	CACNA1G	0.0460085	0.684756	3.89562	0.0106919	UP
hsa-miR-652-3p	10.5097	20.5524	1.95556	0.967579	0.452748	NEUTRAL	CACNA1G	0.0460085	0.684756	3.89562	0.0106919	UP
hsa-miR-652-3p	10.5097	20.5524	1.95556	0.967579	0.452748	NEUTRAL	CACNA1G	0.0460085	0.684756	3.89562	0.0106919	UP
hsa-miR-652-3p	10.5097	20.5524	1.95556	0.967579	0.452748	NEUTRAL	CACNA1G	0.0460085	0.684756	3.89562	0.0106919	UP
hsa-miR-652-3p	10.5097	20.5524	1.95556	0.967579	0.452748	NEUTRAL	CACNA1G	0.0460085	0.684756	3.89562	0.0106919	UP
hsa-miR-652-3p	10.5097	20.5524	1.95556	0.967579	0.452748	NEUTRAL	CACNA1G	0.0460085	0.684756	3.89562	0.0106919	UP
hsa-miR-652-3p	10.5097	20.5524	1.95556	0.967579	0.452748	NEUTRAL	CACNA1G	0.0460085	0.684756	3.89562	0.0106919	UP
hsa-miR-652-3p	10.5097	20.5524	1.95556	0.967579	0.452748	NEUTRAL	CACNA1G	0.0460085	0.684756	3.89562	0.0106919	UP
hsa-miR-652-3p	10.5097	20.5524	1.95556	0.967579	0.452748	NEUTRAL	CACNA1G	0.0460085	0.684756	3.89562	0.0106919	UP
hsa-miR-652-3p	10.5097	20.5524	1.95556	0.967579	0.452748	NEUTRAL	CACNA1G	0.0460085	0.684756	3.89562	0.0106919	UP
hsa-miR-652-3p	10.5097	20.5524	1.95556	0.967579	0.452748	NEUTRAL	CACNA1G	0.0460085	0.684756	3.89562	0.0106919	UP
hsa-miR-652-3p	10.5097	20.5524	1.95556	0.967579	0.452748	NEUTRAL	CACNA1G	0.0460085	0.684756	3.89562	0.0106919	UP
hsa-miR-652-3p	10.5097	20.5524	1.95556	0.967579	0.452748	NEUTRAL	CACNA1G	0.0460085	0.684756	3.89562	0.0106919	UP
hsa-miR-652-3p	10.5097	20.5524	1.95556	0.967579	0.452748	NEUTRAL	CACNA1G	0.0460085	0.684756	3.89562	0.0106919	UP
hsa-miR-652-3p	10.5097	20.5524	1.95556	0.967579	0.452748	NEUTRAL	CACNA1G	0.0460085	0.684756	3.89562	0.0106919	UP
hsa-miR-652-3p	10.5097	20.5524	1.95556	0.967579	0.452748	NEUTRAL	CACNA1G	0.0460085	0.684756	3.89562	0.0106919	UP
hsa-miR-652-3p	10.5097	20.5524	1.95556	0.967579	0.452748	NEUTRAL	CACNA1G	0.0460085	0.684756	3.89562	0.0106919	UP
hsa-miR-652-3p	10.5097	20.5524	1.95556	0.967579	0.452748	NEUTRAL	CACNA1G	0.0460085	0.684756	3.89562	0.0106919	UP
hsa-miR-652-3p	10.5097	20.5524	1.95556	0.967579	0.452748	NEUTRAL	CACNA1G	0.0460085	0.684756	3.89562	0.0106919	UP
hsa-miR-652-3p	10.5097	20.5524	1.95556	0.967579	0.452748	NEUTRAL	CACNA1G	0.0460085	0.684756	3.89562	0.0106919	UP
hsa-miR-652-3p	10.5097	20.5524	1.95556	0.967579	0.452748	NEUTRAL	CACNA1G	0.0460085	0.684756	3.89562	0.0106919	UP
hsa-miR-652-3p	10.5097	20.5524	1.95556	0.967579	0.452748	NEUTRAL	CACNA1G	0.0460085	0.684756	3.89562	0.0106919	UP
hsa-miR-652-3p	10.5097	20.5524	1.95556	0.967579	0.452748	NEUTRAL	CACNA1G	0.0460085	0.684756	3.89562	0.0106919	UP
hsa-miR-143-5p	290.769	466.71	1.60509	0.682652	0.432676	NEUTRAL	CACNA1G	0.0460085	0.684756	3.89562	0.0106919	UP
hsa-miR-339-5p	39.7034	39.392	0.992157	-0.0113599	1	NEUTRAL	CACNA1G	0.0460085	0.684756	3.89562	0.0106919	UP
hsa-miR-339-5p	39.7034	39.392	0.992157	-0.0113599	1	NEUTRAL	CACNA1G	0.0460085	0.684756	3.89562	0.0106919	UP
hsa-miR-339-5p	39.7034	39.392	0.992157	-0.0113599	1	NEUTRAL	CACNA1G	0.0460085	0.684756	3.89562	0.0106919	UP
hsa-miR-339-5p	39.7034	39.392	0.992157	-0.0113599	1	NEUTRAL	CACNA1G	0.0460085	0.684756	3.89562	0.0106919	UP
hsa-miR-339-5p	39.7034	39.392	0.992157	-0.0113599	1	NEUTRAL	CACNA1G	0.0460085	0.684756	3.89562	0.0106919	UP
hsa-miR-339-5p	39.7034	39.392	0.992157	-0.0113599	1	NEUTRAL	CACNA1G	0.0460085	0.684756	3.89562	0.0106919	UP
hsa-miR-339-5p	39.7034	39.392	0.992157	-0.0113599	1	NEUTRAL	CACNA1G	0.0460085	0.684756	3.89562	0.0106919	UP
hsa-miR-339-5p	39.7034	39.392	0.992157	-0.0113599	1	NEUTRAL	CACNA1G	0.0460085	0.684756	3.89562	0.0106919	UP
hsa-miR-339-5p	39.7034	39.392	0.992157	-0.0113599	1	NEUTRAL	CACNA1G	0.0460085	0.684756	3.89562	0.0106919	UP
hsa-miR-339-5p	39.7034	39.392	0.992157	-0.0113599	1	NEUTRAL	CACNA1G	0.0460085	0.684756	3.89562	0.0106919	UP
hsa-miR-339-5p	39.7034	39.392	0.992157	-0.0113599	1	NEUTRAL	CACNA1G	0.0460085	0.684756	3.89562	0.0106919	UP
hsa-miR-339-5p	39.7034	39.392	0.992157	-0.0113599	1	NEUTRAL	CACNA1G	0.0460085	0.684756	3.89562	0.0106919	UP
hsa-miR-339-5p	39.7034	39.392	0.992157	-0.0113599	1	NEUTRAL	CACNA1G	0.0460085	0.684756	3.89562	0.0106919	UP
hsa-miR-339-5p	39.7034	39.392	0.992157	-0.0113599	1	NEUTRAL	CACNA1G	0.0460085	0.684756	3.89562	0.0106919	UP
hsa-miR-339-5p	39.7034	39.392	0.992157	-0.0113599	1	NEUTRAL	CACNA1G	0.0460085	0.684756	3.89562	0.0106919	UP
hsa-miR-339-5p	39.7034	39.392	0.992157	-0.0113599	1	NEUTRAL	CACNA1G	0.0460085	0.684756	3.89562	0.0106919	UP
hsa-miR-339-5p	39.7034	39.392	0.992157	-0.0113599	1	NEUTRAL	CACNA1G	0.0460085	0.684756	3.89562	0.0106919	UP
hsa-miR-339-5p	39.7034	39.392	0.992157	-0.0113599	1	NEUTRAL	CACNA1G	0.0460085	0.684756	3.89562	0.0106919	UP
hsa-miR-339-5p	39.7034	39.392	0.992157	-0.0113599	1	NEUTRAL	CACNA1G	0.0460085	0.684756	3.89562	0.0106919	UP
hsa-miR-339-5p	39.7034	39.392	0.992157	-0.0113599	1	NEUTRAL	CACNA1G	0.0460085	0.684756	3.89562	0.0106919	UP
hsa-miR-339-5p	39.7034	39.392	0.992157	-0.0113599	1	NEUTRAL	CACNA1G	0.0460085	0.684756	3.89562	0.0106919	UP
hsa-miR-339-5p	39.7034	39.392	0.992157	-0.0113599	1	NEUTRAL	CACNA1G	0.0460085	0.684756	3.89562	0.0106919	UP
hsa-miR-339-5p	39.7034	39.392	0.992157	-0.0113599	1	NEUTRAL	CACNA1G	0.0460085	0.684756	3.89562	0.0106919	UP
hsa-miR-339-5p	39.7034	39.392	0.992157	-0.0113599	1	NEUTRAL	CACNA1G	0.0460085	0.684756	3.89562	0.0106919	UP
hsa-miR-339-5p	39.7034	39.392	0.992157	-0.0113599	1	NEUTRAL	CACNA1G	0.0460085	0.684756	3.89562	0.0106919	UP
hsa-miR-339-5p	39.7034	39.392	0.992157	-0.0113599	1	NEUTRAL	CACNA1G	0.0460085	0.684756	3.89562	0.0106919	UP
hsa-miR-339-5p	39.7034	39.392	0.992157	-0.0113599	1	NEUTRAL	CACNA1G	0.0460085	0.684756	3.89562	0.0106919	UP
hsa-miR-339-5p	39.7034	39.392	0.992157	-0.0113599	1	NEUTRAL	CACNA1G	0.0460085	0.684756	3.89562	0.0106919	UP
hsa-miR-339-5p	39.7034	39.392	0.992157	-0.0113599	1	NEUTRAL	CACNA1G	0.0460085	0.684756	3.89562	0.0106919	UP
hsa-miR-339-5p	39.7034	39.392	0.992157	-0.0113599	1	NEUTRAL	CACNA1G	0.0460085	0.684756	3.89562	0.0106919	UP
hsa-miR-339-5p	39.7034	39.392	0.992157	-0.0113599	1	NEUTRAL	CACNA1G	0.0460085	0.684756	3.89562	0.0106919	UP
hsa-miR-339-5p	39.7034	39.392	0.992157	-0.0113599	1	NEUTRAL	CACNA1G	0.0460085	0.684756	3.89562	0.0106919	UP
hsa-miR-1306-5p	10.5097	8.56349	0.814815	-0.295456	0.902973	NEUTRAL	CACNA1G	0.0460085	0.684756	3.89562	0.0106919	UP
hsa-miR-1306-5p	10.5097	8.56349	0.814815	-0.295456	0.902973	NEUTRAL	CACNA1G	0.0460085	0.684756	3.89562	0.0106919	UP
hsa-miR-1306-5p	10.5097	8.56349	0.814815	-0.295456	0.902973	NEUTRAL	CACNA1G	0.0460085	0.684756	3.89562	0.0106919	UP
hsa-miR-1306-5p	10.5097	8.56349	0.814815	-0.295456	0.902973	NEUTRAL	CACNA1G	0.0460085	0.684756	3.89562	0.0106919	UP
hsa-miR-1306-5p	10.5097	8.56349	0.814815	-0.295456	0.902973	NEUTRAL	CACNA1G	0.0460085	0.684756	3.89562	0.0106919	UP
hsa-miR-1306-5p	10.5097	8.56349	0.814815	-0.295456	0.902973	NEUTRAL	CACNA1G	0.0460085	0.684756	3.89562	0.0106919	UP
hsa-miR-1306-5p	10.5097	8.56349	0.814815	-0.295456	0.902973	NEUTRAL	CACNA1G	0.0460085	0.684756	3.89562	0.0106919	UP
hsa-miR-1306-5p	10.5097	8.56349	0.814815	-0.295456	0.902973	NEUTRAL	CACNA1G	0.0460085	0.684756	3.89562	0.0106919	UP
hsa-miR-1306-5p	10.5097	8.56349	0.814815	-0.295456	0.902973	NEUTRAL	CACNA1G	0.0460085	0.684756	3.89562	0.0106919	UP
hsa-miR-1306-5p	10.5097	8.56349	0.814815	-0.295456	0.902973	NEUTRAL	CACNA1G	0.0460085	0.684756	3.89562	0.0106919	UP
hsa-miR-1306-5p	10.5097	8.56349	0.814815	-0.295456	0.902973	NEUTRAL	CACNA1G	0.0460085	0.684756	3.89562	0.0106919	UP
hsa-miR-1306-5p	10.5097	8.56349	0.814815	-0.295456	0.902973	NEUTRAL	CACNA1G	0.0460085	0.684756	3.89562	0.0106919	UP
hsa-miR-1306-5p	10.5097	8.56349	0.814815	-0.295456	0.902973	NEUTRAL	CACNA1G	0.0460085	0.684756	3.89562	0.0106919	UP
hsa-miR-1306-5p	10.5097	8.56349	0.814815	-0.295456	0.902973	NEUTRAL	CACNA1G	0.0460085	0.684756	3.89562	0.0106919	UP
hsa-miR-1306-5p	10.5097	8.56349	0.814815	-0.295456	0.902973	NEUTRAL	CACNA1G	0.0460085	0.684756	3.89562	0.0106919	UP
hsa-miR-1306-5p	10.5097	8.56349	0.814815	-0.295456	0.902973	NEUTRAL	CACNA1G	0.0460085	0.684756	3.89562	0.0106919	UP
hsa-miR-1306-5p	10.5097	8.56349	0.814815	-0.295456	0.902973	NEUTRAL	CACNA1G	0.0460085	0.684756	3.89562	0.0106919	UP
hsa-miR-1306-5p	10.5097	8.56349	0.814815	-0.295456	0.902973	NEUTRAL	CACNA1G	0.0460085	0.684756	3.89562	0.0106919	UP
hsa-miR-1306-5p	10.5097	8.56349	0.814815	-0.295456	0.902973	NEUTRAL	CACNA1G	0.0460085	0.684756	3.89562	0.0106919	UP
hsa-miR-1306-5p	10.5097	8.56349	0.814815	-0.295456	0.902973	NEUTRAL	CACNA1G	0.0460085	0.684756	3.89562	0.0106919	UP
hsa-miR-1306-5p	10.5097	8.56349	0.814815	-0.295456	0.902973	NEUTRAL	CACNA1G	0.0460085	0.684756	3.89562	0.0106919	UP
hsa-miR-1306-5p	10.5097	8.56349	0.814815	-0.295456	0.902973	NEUTRAL	CACNA1G	0.0460085	0.684756	3.89562	0.0106919	UP
hsa-miR-1306-5p	10.5097	8.56349	0.814815	-0.295456	0.902973	NEUTRAL	CACNA1G	0.0460085	0.684756	3.89562	0.0106919	UP
hsa-miR-1306-5p	10.5097	8.56349	0.814815	-0.295456	0.902973	NEUTRAL	CACNA1G	0.0460085	0.684756	3.89562	0.0106919	UP
hsa-miR-1306-5p	10.5097	8.56349	0.814815	-0.295456	0.902973	NEUTRAL	CACNA1G	0.0460085	0.684756	3.89562	0.0106919	UP
hsa-miR-1306-5p	10.5097	8.56349	0.814815	-0.295456	0.902973	NEUTRAL	CACNA1G	0.0460085	0.684756	3.89562	0.0106919	UP
hsa-miR-1306-5p	10.5097	8.56349	0.814815	-0.295456	0.902973	NEUTRAL	CACNA1G	0.0460085	0.684756	3.89562	0.0106919	UP
hsa-miR-1306-5p	10.5097	8.56349	0.814815	-0.295456	0.902973	NEUTRAL	CACNA1G	0.0460085	0.684756	3.89562	0.0106919	UP
hsa-miR-1306-5p	10.5097	8.56349	0.814815	-0.295456	0.902973	NEUTRAL	CACNA1G	0.0460085	0.684756	3.89562	0.0106919	UP
hsa-miR-1306-5p	10.5097	8.56349	0.814815	-0.295456	0.902973	NEUTRAL	CACNA1G	0.0460085	0.684756	3.89562	0.0106919	UP
hsa-miR-1306-5p	10.5097	8.56349	0.814815	-0.295456	0.902973	NEUTRAL	CACNA1G	0.0460085	0.684756	3.89562	0.0106919	UP
hsa-miR-1306-5p	10.5097	8.56349	0.814815	-0.295456	0.902973	NEUTRAL	CACNA1G	0.0460085	0.684756	3.89562	0.0106919	UP
hsa-miR-766-3p	12.8452	10.2762	0.8	-0.321928	0.865138	NEUTRAL	CACNA1G	0.0460085	0.684756	3.89562	0.0106919	UP
hsa-miR-766-3p	12.8452	10.2762	0.8	-0.321928	0.865138	NEUTRAL	CACNA1G	0.0460085	0.684756	3.89562	0.0106919	UP
hsa-miR-766-3p	12.8452	10.2762	0.8	-0.321928	0.865138	NEUTRAL	CACNA1G	0.0460085	0.684756	3.89562	0.0106919	UP
hsa-miR-766-3p	12.8452	10.2762	0.8	-0.321928	0.865138	NEUTRAL	CACNA1G	0.0460085	0.684756	3.89562	0.0106919	UP
hsa-miR-766-3p	12.8452	10.2762	0.8	-0.321928	0.865138	NEUTRAL	CACNA1G	0.0460085	0.684756	3.89562	0.0106919	UP
hsa-miR-766-3p	12.8452	10.2762	0.8	-0.321928	0.865138	NEUTRAL	CACNA1G	0.0460085	0.684756	3.89562	0.0106919	UP
hsa-miR-766-3p	12.8452	10.2762	0.8	-0.321928	0.865138	NEUTRAL	CACNA1G	0.0460085	0.684756	3.89562	0.0106919	UP
hsa-miR-766-3p	12.8452	10.2762	0.8	-0.321928	0.865138	NEUTRAL	CACNA1G	0.0460085	0.684756	3.89562	0.0106919	UP
hsa-miR-766-3p	12.8452	10.2762	0.8	-0.321928	0.865138	NEUTRAL	CACNA1G	0.0460085	0.684756	3.89562	0.0106919	UP
hsa-miR-766-3p	12.8452	10.2762	0.8	-0.321928	0.865138	NEUTRAL	CACNA1G	0.0460085	0.684756	3.89562	0.0106919	UP
hsa-miR-766-3p	12.8452	10.2762	0.8	-0.321928	0.865138	NEUTRAL	CACNA1G	0.0460085	0.684756	3.89562	0.0106919	UP
hsa-miR-766-3p	12.8452	10.2762	0.8	-0.321928	0.865138	NEUTRAL	CACNA1G	0.0460085	0.684756	3.89562	0.0106919	UP
hsa-miR-766-3p	12.8452	10.2762	0.8	-0.321928	0.865138	NEUTRAL	CACNA1G	0.0460085	0.684756	3.89562	0.0106919	UP
hsa-miR-766-3p	12.8452	10.2762	0.8	-0.321928	0.865138	NEUTRAL	CACNA1G	0.0460085	0.684756	3.89562	0.0106919	UP
hsa-miR-766-3p	12.8452	10.2762	0.8	-0.321928	0.865138	NEUTRAL	CACNA1G	0.0460085	0.684756	3.89562	0.0106919	UP
hsa-miR-766-3p	12.8452	10.2762	0.8	-0.321928	0.865138	NEUTRAL	CACNA1G	0.0460085	0.684756	3.89562	0.0106919	UP
hsa-miR-766-3p	12.8452	10.2762	0.8	-0.321928	0.865138	NEUTRAL	CACNA1G	0.0460085	0.684756	3.89562	0.0106919	UP
hsa-miR-766-3p	12.8452	10.2762	0.8	-0.321928	0.865138	NEUTRAL	CACNA1G	0.0460085	0.684756	3.89562	0.0106919	UP
hsa-miR-766-3p	12.8452	10.2762	0.8	-0.321928	0.865138	NEUTRAL	CACNA1G	0.0460085	0.684756	3.89562	0.0106919	UP
hsa-miR-766-3p	12.8452	10.2762	0.8	-0.321928	0.865138	NEUTRAL	CACNA1G	0.0460085	0.684756	3.89562	0.0106919	UP
hsa-miR-766-3p	12.8452	10.2762	0.8	-0.321928	0.865138	NEUTRAL	CACNA1G	0.0460085	0.684756	3.89562	0.0106919	UP
hsa-miR-766-3p	12.8452	10.2762	0.8	-0.321928	0.865138	NEUTRAL	CACNA1G	0.0460085	0.684756	3.89562	0.0106919	UP
hsa-miR-766-3p	12.8452	10.2762	0.8	-0.321928	0.865138	NEUTRAL	CACNA1G	0.0460085	0.684756	3.89562	0.0106919	UP
hsa-miR-766-3p	12.8452	10.2762	0.8	-0.321928	0.865138	NEUTRAL	CACNA1G	0.0460085	0.684756	3.89562	0.0106919	UP
hsa-miR-766-3p	12.8452	10.2762	0.8	-0.321928	0.865138	NEUTRAL	CACNA1G	0.0460085	0.684756	3.89562	0.0106919	UP
hsa-miR-766-3p	12.8452	10.2762	0.8	-0.321928	0.865138	NEUTRAL	CACNA1G	0.0460085	0.684756	3.89562	0.0106919	UP
hsa-miR-766-3p	12.8452	10.2762	0.8	-0.321928	0.865138	NEUTRAL	CACNA1G	0.0460085	0.684756	3.89562	0.0106919	UP
hsa-miR-766-3p	12.8452	10.2762	0.8	-0.321928	0.865138	NEUTRAL	CACNA1G	0.0460085	0.684756	3.89562	0.0106919	UP
hsa-miR-766-3p	12.8452	10.2762	0.8	-0.321928	0.865138	NEUTRAL	CACNA1G	0.0460085	0.684756	3.89562	0.0106919	UP
hsa-miR-766-3p	12.8452	10.2762	0.8	-0.321928	0.865138	NEUTRAL	CACNA1G	0.0460085	0.684756	3.89562	0.0106919	UP
hsa-miR-766-3p	12.8452	10.2762	0.8	-0.321928	0.865138	NEUTRAL	CACNA1G	0.0460085	0.684756	3.89562	0.0106919	UP
hsa-miR-149-5p	416.886	306.573	0.735387	-0.443423	0.61018	NEUTRAL	CACNA1G	0.0460085	0.684756	3.89562	0.0106919	UP
hsa-miR-149-5p	416.886	306.573	0.735387	-0.443423	0.61018	NEUTRAL	CACNA1G	0.0460085	0.684756	3.89562	0.0106919	UP
hsa-miR-149-5p	416.886	306.573	0.735387	-0.443423	0.61018	NEUTRAL	CACNA1G	0.0460085	0.684756	3.89562	0.0106919	UP
hsa-miR-149-5p	416.886	306.573	0.735387	-0.443423	0.61018	NEUTRAL	CACNA1G	0.0460085	0.684756	3.89562	0.0106919	UP
hsa-miR-149-5p	416.886	306.573	0.735387	-0.443423	0.61018	NEUTRAL	CACNA1G	0.0460085	0.684756	3.89562	0.0106919	UP
hsa-miR-149-5p	416.886	306.573	0.735387	-0.443423	0.61018	NEUTRAL	CACNA1G	0.0460085	0.684756	3.89562	0.0106919	UP
hsa-miR-149-5p	416.886	306.573	0.735387	-0.443423	0.61018	NEUTRAL	CACNA1G	0.0460085	0.684756	3.89562	0.0106919	UP
hsa-miR-149-5p	416.886	306.573	0.735387	-0.443423	0.61018	NEUTRAL	CACNA1G	0.0460085	0.684756	3.89562	0.0106919	UP
hsa-miR-149-5p	416.886	306.573	0.735387	-0.443423	0.61018	NEUTRAL	CACNA1G	0.0460085	0.684756	3.89562	0.0106919	UP
hsa-miR-149-5p	416.886	306.573	0.735387	-0.443423	0.61018	NEUTRAL	CACNA1G	0.0460085	0.684756	3.89562	0.0106919	UP
hsa-miR-149-5p	416.886	306.573	0.735387	-0.443423	0.61018	NEUTRAL	CACNA1G	0.0460085	0.684756	3.89562	0.0106919	UP
hsa-miR-149-5p	416.886	306.573	0.735387	-0.443423	0.61018	NEUTRAL	CACNA1G	0.0460085	0.684756	3.89562	0.0106919	UP
hsa-miR-149-5p	416.886	306.573	0.735387	-0.443423	0.61018	NEUTRAL	CACNA1G	0.0460085	0.684756	3.89562	0.0106919	UP
hsa-miR-149-5p	416.886	306.573	0.735387	-0.443423	0.61018	NEUTRAL	CACNA1G	0.0460085	0.684756	3.89562	0.0106919	UP
hsa-miR-149-5p	416.886	306.573	0.735387	-0.443423	0.61018	NEUTRAL	CACNA1G	0.0460085	0.684756	3.89562	0.0106919	UP
hsa-miR-149-5p	416.886	306.573	0.735387	-0.443423	0.61018	NEUTRAL	CACNA1G	0.0460085	0.684756	3.89562	0.0106919	UP
hsa-miR-149-5p	416.886	306.573	0.735387	-0.443423	0.61018	NEUTRAL	CACNA1G	0.0460085	0.684756	3.89562	0.0106919	UP
hsa-miR-149-5p	416.886	306.573	0.735387	-0.443423	0.61018	NEUTRAL	CACNA1G	0.0460085	0.684756	3.89562	0.0106919	UP
hsa-miR-149-5p	416.886	306.573	0.735387	-0.443423	0.61018	NEUTRAL	CACNA1G	0.0460085	0.684756	3.89562	0.0106919	UP
hsa-miR-149-5p	416.886	306.573	0.735387	-0.443423	0.61018	NEUTRAL	CACNA1G	0.0460085	0.684756	3.89562	0.0106919	UP
hsa-miR-149-5p	416.886	306.573	0.735387	-0.443423	0.61018	NEUTRAL	CACNA1G	0.0460085	0.684756	3.89562	0.0106919	UP
hsa-miR-149-5p	416.886	306.573	0.735387	-0.443423	0.61018	NEUTRAL	CACNA1G	0.0460085	0.684756	3.89562	0.0106919	UP
hsa-miR-149-5p	416.886	306.573	0.735387	-0.443423	0.61018	NEUTRAL	CACNA1G	0.0460085	0.684756	3.89562	0.0106919	UP
hsa-miR-149-5p	416.886	306.573	0.735387	-0.443423	0.61018	NEUTRAL	CACNA1G	0.0460085	0.684756	3.89562	0.0106919	UP
hsa-miR-149-5p	416.886	306.573	0.735387	-0.443423	0.61018	NEUTRAL	CACNA1G	0.0460085	0.684756	3.89562	0.0106919	UP
hsa-miR-149-5p	416.886	306.573	0.735387	-0.443423	0.61018	NEUTRAL	CACNA1G	0.0460085	0.684756	3.89562	0.0106919	UP
hsa-miR-149-5p	416.886	306.573	0.735387	-0.443423	0.61018	NEUTRAL	CACNA1G	0.0460085	0.684756	3.89562	0.0106919	UP
hsa-miR-149-5p	416.886	306.573	0.735387	-0.443423	0.61018	NEUTRAL	CACNA1G	0.0460085	0.684756	3.89562	0.0106919	UP
hsa-miR-149-5p	416.886	306.573	0.735387	-0.443423	0.61018	NEUTRAL	CACNA1G	0.0460085	0.684756	3.89562	0.0106919	UP
hsa-miR-149-5p	416.886	306.573	0.735387	-0.443423	0.61018	NEUTRAL	CACNA1G	0.0460085	0.684756	3.89562	0.0106919	UP
hsa-miR-149-5p	416.886	306.573	0.735387	-0.443423	0.61018	NEUTRAL	CACNA1G	0.0460085	0.684756	3.89562	0.0106919	UP
hsa-miR-149-5p	416.886	306.573	0.735387	-0.443423	0.61018	NEUTRAL	CACNA1G	0.0460085	0.684756	3.89562	0.0106919	UP
hsa-miR-93-3p	37.3679	16.2706	0.435417	-1.19953	0.287475	DOWN	CACNA1G	0.0460085	0.684756	3.89562	0.0106919	UP
hsa-miR-93-3p	37.3679	16.2706	0.435417	-1.19953	0.287475	DOWN	CACNA1G	0.0460085	0.684756	3.89562	0.0106919	UP
hsa-miR-93-3p	37.3679	16.2706	0.435417	-1.19953	0.287475	DOWN	CACNA1G	0.0460085	0.684756	3.89562	0.0106919	UP
hsa-miR-93-3p	37.3679	16.2706	0.435417	-1.19953	0.287475	DOWN	CACNA1G	0.0460085	0.684756	3.89562	0.0106919	UP
hsa-miR-93-3p	37.3679	16.2706	0.435417	-1.19953	0.287475	DOWN	CACNA1G	0.0460085	0.684756	3.89562	0.0106919	UP
hsa-miR-93-3p	37.3679	16.2706	0.435417	-1.19953	0.287475	DOWN	CACNA1G	0.0460085	0.684756	3.89562	0.0106919	UP
hsa-miR-93-3p	37.3679	16.2706	0.435417	-1.19953	0.287475	DOWN	CACNA1G	0.0460085	0.684756	3.89562	0.0106919	UP
hsa-miR-93-3p	37.3679	16.2706	0.435417	-1.19953	0.287475	DOWN	CACNA1G	0.0460085	0.684756	3.89562	0.0106919	UP
hsa-miR-93-3p	37.3679	16.2706	0.435417	-1.19953	0.287475	DOWN	CACNA1G	0.0460085	0.684756	3.89562	0.0106919	UP
hsa-miR-93-3p	37.3679	16.2706	0.435417	-1.19953	0.287475	DOWN	CACNA1G	0.0460085	0.684756	3.89562	0.0106919	UP
hsa-miR-93-3p	37.3679	16.2706	0.435417	-1.19953	0.287475	DOWN	CACNA1G	0.0460085	0.684756	3.89562	0.0106919	UP
hsa-miR-93-3p	37.3679	16.2706	0.435417	-1.19953	0.287475	DOWN	CACNA1G	0.0460085	0.684756	3.89562	0.0106919	UP
hsa-miR-93-3p	37.3679	16.2706	0.435417	-1.19953	0.287475	DOWN	CACNA1G	0.0460085	0.684756	3.89562	0.0106919	UP
hsa-miR-93-3p	37.3679	16.2706	0.435417	-1.19953	0.287475	DOWN	CACNA1G	0.0460085	0.684756	3.89562	0.0106919	UP
hsa-miR-93-3p	37.3679	16.2706	0.435417	-1.19953	0.287475	DOWN	CACNA1G	0.0460085	0.684756	3.89562	0.0106919	UP
hsa-miR-93-3p	37.3679	16.2706	0.435417	-1.19953	0.287475	DOWN	CACNA1G	0.0460085	0.684756	3.89562	0.0106919	UP
hsa-miR-93-3p	37.3679	16.2706	0.435417	-1.19953	0.287475	DOWN	CACNA1G	0.0460085	0.684756	3.89562	0.0106919	UP
hsa-miR-93-3p	37.3679	16.2706	0.435417	-1.19953	0.287475	DOWN	CACNA1G	0.0460085	0.684756	3.89562	0.0106919	UP
hsa-miR-93-3p	37.3679	16.2706	0.435417	-1.19953	0.287475	DOWN	CACNA1G	0.0460085	0.684756	3.89562	0.0106919	UP
hsa-miR-93-3p	37.3679	16.2706	0.435417	-1.19953	0.287475	DOWN	CACNA1G	0.0460085	0.684756	3.89562	0.0106919	UP
hsa-miR-93-3p	37.3679	16.2706	0.435417	-1.19953	0.287475	DOWN	CACNA1G	0.0460085	0.684756	3.89562	0.0106919	UP
hsa-miR-93-3p	37.3679	16.2706	0.435417	-1.19953	0.287475	DOWN	CACNA1G	0.0460085	0.684756	3.89562	0.0106919	UP
hsa-miR-93-3p	37.3679	16.2706	0.435417	-1.19953	0.287475	DOWN	CACNA1G	0.0460085	0.684756	3.89562	0.0106919	UP
hsa-miR-93-3p	37.3679	16.2706	0.435417	-1.19953	0.287475	DOWN	CACNA1G	0.0460085	0.684756	3.89562	0.0106919	UP
hsa-miR-93-3p	37.3679	16.2706	0.435417	-1.19953	0.287475	DOWN	CACNA1G	0.0460085	0.684756	3.89562	0.0106919	UP
hsa-miR-93-3p	37.3679	16.2706	0.435417	-1.19953	0.287475	DOWN	CACNA1G	0.0460085	0.684756	3.89562	0.0106919	UP
hsa-miR-93-3p	37.3679	16.2706	0.435417	-1.19953	0.287475	DOWN	CACNA1G	0.0460085	0.684756	3.89562	0.0106919	UP
hsa-miR-93-3p	37.3679	16.2706	0.435417	-1.19953	0.287475	DOWN	CACNA1G	0.0460085	0.684756	3.89562	0.0106919	UP
hsa-miR-93-3p	37.3679	16.2706	0.435417	-1.19953	0.287475	DOWN	CACNA1G	0.0460085	0.684756	3.89562	0.0106919	UP
hsa-miR-93-3p	37.3679	16.2706	0.435417	-1.19953	0.287475	DOWN	CACNA1G	0.0460085	0.684756	3.89562	0.0106919	UP
hsa-miR-93-3p	37.3679	16.2706	0.435417	-1.19953	0.287475	DOWN	CACNA1G	0.0460085	0.684756	3.89562	0.0106919	UP
hsa-miR-93-3p	37.3679	16.2706	0.435417	-1.19953	0.287475	DOWN	CACNA1G	0.0460085	0.684756	3.89562	0.0106919	UP
hsa-miR-1268b	72.4004	113.038	1.56129	0.642739	0.51546	NEUTRAL	SCUBE1	0.0732103	1.07903	3.88155	0.99965	UP
hsa-miR-1268b	72.4004	113.038	1.56129	0.642739	0.51546	NEUTRAL	SCUBE1	0.0732103	1.07903	3.88155	0.99965	UP
hsa-miR-5100	25.6905	35.9667	1.4	0.485427	0.679016	NEUTRAL	SCUBE1	0.0732103	1.07903	3.88155	0.99965	UP
hsa-miR-877-5p	19.8517	9.41984	0.47451	-1.07549	0.396051	DOWN	SCUBE1	0.0732103	1.07903	3.88155	0.99965	UP
hsa-miR-4488	3253.35	2433.74	0.748074	-0.418748	0.612634	NEUTRAL	BMP6	1.08294	15.9083	3.87674	0.99965	UP
hsa-miR-3960	12.8452	3.4254	0.266667	-1.90689	0.182003	DOWN	BMP6	1.08294	15.9083	3.87674	0.99965	UP
hsa-miR-766-3p	12.8452	10.2762	0.8	-0.321928	0.865138	NEUTRAL	RGCC	1.76367	25.5913	3.859	0.141255	UP
hsa-miR-330-5p	65.3939	89.9166	1.375	0.459432	0.651801	NEUTRAL	IFI44L	0.314773	4.43858	3.81771	0.147044	UP
hsa-miR-1469	1.16775	8.56349	7.33333	2.87447	0.128943	UP	PPARG	0.135754	1.89887	3.80608	0.0700122	UP
hsa-miR-33b-3p	4.67099	8.56349	1.83333	0.874469	0.618247	NEUTRAL	PPL	0.155811	2.13996	3.77972	0.685956	UP
hsa-miR-4466	12.8452	21.4087	1.66667	0.736966	0.567146	NEUTRAL	PPL	0.155811	2.13996	3.77972	0.685956	UP
hsa-miR-2277-3p	8.17424	12.8452	1.57143	0.652077	0.672249	NEUTRAL	PPL	0.155811	2.13996	3.77972	0.685956	UP
hsa-miR-1301-3p	18.684	19.696	1.05417	0.076103	1	NEUTRAL	PPL	0.155811	2.13996	3.77972	0.685956	UP
hsa-miR-1301-3p	18.684	19.696	1.05417	0.076103	1	NEUTRAL	PPL	0.155811	2.13996	3.77972	0.685956	UP
hsa-miR-1301-3p	18.684	19.696	1.05417	0.076103	1	NEUTRAL	PPL	0.155811	2.13996	3.77972	0.685956	UP
hsa-miR-210-5p	343.318	101.049	0.294331	-1.76449	0.0554073	DOWN	PPL	0.155811	2.13996	3.77972	0.685956	UP
hsa-miR-210-5p	343.318	101.049	0.294331	-1.76449	0.0554073	DOWN	PPL	0.155811	2.13996	3.77972	0.685956	UP
hsa-miR-3960	12.8452	3.4254	0.266667	-1.90689	0.182003	DOWN	PPL	0.155811	2.13996	3.77972	0.685956	UP
hsa-miR-1469	1.16775	8.56349	7.33333	2.87447	0.128943	UP	PRKAR2B	0.0397684	0.540463	3.7645	0.99965	UP
hsa-miR-671-5p	58.3874	71.077	1.21733	0.283724	0.792222	NEUTRAL	PRKAR2B	0.0397684	0.540463	3.7645	0.99965	UP
hsa-miR-5787	12.8452	12.8452	1	0	1	NEUTRAL	PRKAR2B	0.0397684	0.540463	3.7645	0.99965	UP
hsa-miR-665	35.0325	53.95	1.54	0.62293	0.564592	NEUTRAL	RTN4RL1	0.146569	1.9837	3.75855	0.326793	UP
hsa-miR-5787	12.8452	12.8452	1	0	1	NEUTRAL	RTN4RL1	0.146569	1.9837	3.75855	0.326793	UP
hsa-miR-744-5p	850.121	678.228	0.797802	-0.325897	0.696683	NEUTRAL	RTN4RL1	0.146569	1.9837	3.75855	0.326793	UP
hsa-miR-210-5p	343.318	101.049	0.294331	-1.76449	0.0554073	DOWN	PEBP4	0.0579501	0.783774	3.75755	0.99965	UP
hsa-miR-4516	15.1807	63.3698	4.17436	2.06155	0.0638169	UP	NANOS1	0.120686	1.62934	3.75497	0.99965	UP
hsa-miR-4516	15.1807	63.3698	4.17436	2.06155	0.0638169	UP	NANOS1	0.120686	1.62934	3.75497	0.99965	UP
hsa-miR-4508	179.833	108.756	0.604762	-0.725561	0.439635	NEUTRAL	NANOS1	0.120686	1.62934	3.75497	0.99965	UP
hsa-miR-3960	12.8452	3.4254	0.266667	-1.90689	0.182003	DOWN	NANOS1	0.120686	1.62934	3.75497	0.99965	UP
hsa-miR-1469	1.16775	8.56349	7.33333	2.87447	0.128943	UP	NKD2	0.179511	2.419	3.75226	0.929535	UP
hsa-miR-1469	1.16775	8.56349	7.33333	2.87447	0.128943	UP	NKD2	0.179511	2.419	3.75226	0.929535	UP
hsa-miR-1469	1.16775	8.56349	7.33333	2.87447	0.128943	UP	NKD2	0.179511	2.419	3.75226	0.929535	UP
hsa-miR-1469	1.16775	8.56349	7.33333	2.87447	0.128943	UP	NKD2	0.179511	2.419	3.75226	0.929535	UP
hsa-miR-1287-5p	31.5292	45.3865	1.43951	0.525574	0.638112	NEUTRAL	NKD2	0.179511	2.419	3.75226	0.929535	UP
hsa-miR-1287-5p	31.5292	45.3865	1.43951	0.525574	0.638112	NEUTRAL	NKD2	0.179511	2.419	3.75226	0.929535	UP
hsa-miR-1287-5p	31.5292	45.3865	1.43951	0.525574	0.638112	NEUTRAL	NKD2	0.179511	2.419	3.75226	0.929535	UP
hsa-miR-1287-5p	31.5292	45.3865	1.43951	0.525574	0.638112	NEUTRAL	NKD2	0.179511	2.419	3.75226	0.929535	UP
hsa-miR-1287-5p	31.5292	45.3865	1.43951	0.525574	0.638112	NEUTRAL	NKD2	0.179511	2.419	3.75226	0.929535	UP
hsa-miR-758-5p	12.8452	3.4254	0.266667	-1.90689	0.182003	DOWN	NKD2	0.179511	2.419	3.75226	0.929535	UP
hsa-miR-758-5p	12.8452	3.4254	0.266667	-1.90689	0.182003	DOWN	NKD2	0.179511	2.419	3.75226	0.929535	UP
hsa-miR-758-5p	12.8452	3.4254	0.266667	-1.90689	0.182003	DOWN	NKD2	0.179511	2.419	3.75226	0.929535	UP
hsa-miR-758-5p	12.8452	3.4254	0.266667	-1.90689	0.182003	DOWN	NKD2	0.179511	2.419	3.75226	0.929535	UP
hsa-miR-758-5p	12.8452	3.4254	0.266667	-1.90689	0.182003	DOWN	NKD2	0.179511	2.419	3.75226	0.929535	UP
hsa-miR-758-5p	12.8452	3.4254	0.266667	-1.90689	0.182003	DOWN	NKD2	0.179511	2.419	3.75226	0.929535	UP
hsa-miR-210-5p	343.318	101.049	0.294331	-1.76449	0.0554073	DOWN	GRIA1	0.0984821	1.32513	3.75013	0.0671123	UP
hsa-miR-210-5p	343.318	101.049	0.294331	-1.76449	0.0554073	DOWN	GRIA1	0.0984821	1.32513	3.75013	0.0671123	UP
hsa-miR-5100	25.6905	35.9667	1.4	0.485427	0.679016	NEUTRAL	RP11-834C11.7	0.0755671	1.00236	3.7295	0.99965	UP
hsa-miR-4466	12.8452	21.4087	1.66667	0.736966	0.567146	NEUTRAL	PTGS1	0.518215	6.73615	3.7003	0.0454406	UP
hsa-miR-106b-3p	108.601	115.607	1.06452	0.0901978	0.935873	NEUTRAL	PTGS1	0.518215	6.73615	3.7003	0.0454406	UP
hsa-miR-106b-3p	108.601	115.607	1.06452	0.0901978	0.935873	NEUTRAL	PTGS1	0.518215	6.73615	3.7003	0.0454406	UP
hsa-miR-106b-3p	108.601	115.607	1.06452	0.0901978	0.935873	NEUTRAL	PTGS1	0.518215	6.73615	3.7003	0.0454406	UP
hsa-miR-106b-3p	108.601	115.607	1.06452	0.0901978	0.935873	NEUTRAL	PTGS1	0.518215	6.73615	3.7003	0.0454406	UP
hsa-miR-106b-3p	108.601	115.607	1.06452	0.0901978	0.935873	NEUTRAL	PTGS1	0.518215	6.73615	3.7003	0.0454406	UP
hsa-miR-106b-3p	108.601	115.607	1.06452	0.0901978	0.935873	NEUTRAL	PTGS1	0.518215	6.73615	3.7003	0.0454406	UP
hsa-miR-6716-3p	12.8452	8.56349	0.666667	-0.584963	0.701258	NEUTRAL	PTGS1	0.518215	6.73615	3.7003	0.0454406	UP
hsa-miR-6716-3p	12.8452	8.56349	0.666667	-0.584963	0.701258	NEUTRAL	PTGS1	0.518215	6.73615	3.7003	0.0454406	UP
hsa-miR-6716-3p	12.8452	8.56349	0.666667	-0.584963	0.701258	NEUTRAL	PTGS1	0.518215	6.73615	3.7003	0.0454406	UP
hsa-miR-6716-3p	12.8452	8.56349	0.666667	-0.584963	0.701258	NEUTRAL	PTGS1	0.518215	6.73615	3.7003	0.0454406	UP
hsa-miR-6716-3p	12.8452	8.56349	0.666667	-0.584963	0.701258	NEUTRAL	PTGS1	0.518215	6.73615	3.7003	0.0454406	UP
hsa-miR-668-3p	51.3809	24.8341	0.483333	-1.04891	0.329782	DOWN	PTGS1	0.518215	6.73615	3.7003	0.0454406	UP
hsa-miR-668-3p	51.3809	24.8341	0.483333	-1.04891	0.329782	DOWN	PTGS1	0.518215	6.73615	3.7003	0.0454406	UP
hsa-miR-668-3p	51.3809	24.8341	0.483333	-1.04891	0.329782	DOWN	PTGS1	0.518215	6.73615	3.7003	0.0454406	UP
hsa-miR-668-3p	51.3809	24.8341	0.483333	-1.04891	0.329782	DOWN	PTGS1	0.518215	6.73615	3.7003	0.0454406	UP
hsa-miR-668-3p	51.3809	24.8341	0.483333	-1.04891	0.329782	DOWN	PTGS1	0.518215	6.73615	3.7003	0.0454406	UP
hsa-miR-1285-3p	119.11	183.259	1.53856	0.621583	0.508504	NEUTRAL	WISP2	0.375921	4.70043	3.64429	0.25403	UP
hsa-miR-1304-3p	161.149	160.994	0.999034	-0.00139458	1	NEUTRAL	WISP2	0.375921	4.70043	3.64429	0.25403	UP
hsa-miR-27b-3p	140632	111155	0.790396	-0.339352	0.759	NEUTRAL	WISP2	0.375921	4.70043	3.64429	0.25403	UP
hsa-miR-296-5p	16.3485	24.8341	1.51905	0.603167	0.631192	NEUTRAL	TMEM119	5.11117	63.0993	3.6259	0.0106919	UP
hsa-miR-5787	12.8452	12.8452	1	0	1	NEUTRAL	TMEM119	5.11117	63.0993	3.6259	0.0106919	UP
hsa-miR-5787	12.8452	12.8452	1	0	1	NEUTRAL	TMEM119	5.11117	63.0993	3.6259	0.0106919	UP
hsa-miR-30b-3p	18.684	14.5579	0.779167	-0.359996	0.806338	NEUTRAL	TMEM119	5.11117	63.0993	3.6259	0.0106919	UP
hsa-miR-4532	44613.8	18135.8	0.406505	-1.29865	0.174811	DOWN	TMEM119	5.11117	63.0993	3.6259	0.0106919	UP
hsa-miR-4532	44613.8	18135.8	0.406505	-1.29865	0.174811	DOWN	TMEM119	5.11117	63.0993	3.6259	0.0106919	UP
hsa-miR-210-5p	343.318	101.049	0.294331	-1.76449	0.0554073	DOWN	TMEM119	5.11117	63.0993	3.6259	0.0106919	UP
hsa-miR-532-3p	1.16775	20.5524	17.6	4.1375	0.0150138	UP	LCNL1,PTGDS	4.36743	53.8991	3.6254	0.0106919	UP
hsa-miR-532-3p	1.16775	20.5524	17.6	4.1375	0.0150138	UP	LCNL1,PTGDS	4.36743	53.8991	3.6254	0.0106919	UP
hsa-miR-193b-3p	1140.89	2474.85	2.16923	1.11718	0.179866	UP	LCNL1,PTGDS	4.36743	53.8991	3.6254	0.0106919	UP
hsa-miR-193b-3p	1140.89	2474.85	2.16923	1.11718	0.179866	UP	LCNL1,PTGDS	4.36743	53.8991	3.6254	0.0106919	UP
hsa-miR-193b-3p	1140.89	2474.85	2.16923	1.11718	0.179866	UP	LCNL1,PTGDS	4.36743	53.8991	3.6254	0.0106919	UP
hsa-miR-5100	25.6905	35.9667	1.4	0.485427	0.679016	NEUTRAL	LCNL1,PTGDS	4.36743	53.8991	3.6254	0.0106919	UP
hsa-miR-5100	25.6905	35.9667	1.4	0.485427	0.679016	NEUTRAL	LCNL1,PTGDS	4.36743	53.8991	3.6254	0.0106919	UP
hsa-miR-5100	25.6905	35.9667	1.4	0.485427	0.679016	NEUTRAL	LCNL1,PTGDS	4.36743	53.8991	3.6254	0.0106919	UP
hsa-miR-5100	25.6905	35.9667	1.4	0.485427	0.679016	NEUTRAL	LCNL1,PTGDS	4.36743	53.8991	3.6254	0.0106919	UP
hsa-miR-330-5p	65.3939	89.9166	1.375	0.459432	0.651801	NEUTRAL	LCNL1,PTGDS	4.36743	53.8991	3.6254	0.0106919	UP
hsa-miR-941	1125.71	1156.07	1.02697	0.0383954	0.965034	NEUTRAL	LCNL1,PTGDS	4.36743	53.8991	3.6254	0.0106919	UP
hsa-miR-532-3p	1.16775	20.5524	17.6	4.1375	0.0150138	UP	WFDC1	0.958682	11.7151	3.61118	0.072705	UP
hsa-miR-874-5p	15.1807	30.8286	2.03077	1.02203	0.386358	UP	WFDC1	0.958682	11.7151	3.61118	0.072705	UP
hsa-miR-874-5p	15.1807	30.8286	2.03077	1.02203	0.386358	UP	WFDC1	0.958682	11.7151	3.61118	0.072705	UP
hsa-miR-874-5p	15.1807	30.8286	2.03077	1.02203	0.386358	UP	WFDC1	0.958682	11.7151	3.61118	0.072705	UP
hsa-miR-2277-3p	8.17424	12.8452	1.57143	0.652077	0.672249	NEUTRAL	WFDC1	0.958682	11.7151	3.61118	0.072705	UP
hsa-miR-2277-3p	8.17424	12.8452	1.57143	0.652077	0.672249	NEUTRAL	WFDC1	0.958682	11.7151	3.61118	0.072705	UP
hsa-miR-5787	12.8452	12.8452	1	0	1	NEUTRAL	WFDC1	0.958682	11.7151	3.61118	0.072705	UP
hsa-miR-328-3p	142.465	68.5079	0.480874	-1.05627	0.275341	DOWN	WFDC1	0.958682	11.7151	3.61118	0.072705	UP
hsa-miR-615-3p	228.879	602.013	2.63027	1.39521	0.110374	UP	NPTX1	0.0596851	0.72877	3.61002	0.679427	UP
hsa-miR-665	35.0325	53.95	1.54	0.62293	0.564592	NEUTRAL	NPTX1	0.0596851	0.72877	3.61002	0.679427	UP
hsa-miR-296-5p	16.3485	24.8341	1.51905	0.603167	0.631192	NEUTRAL	NPTX1	0.0596851	0.72877	3.61002	0.679427	UP
hsa-miR-296-5p	16.3485	24.8341	1.51905	0.603167	0.631192	NEUTRAL	NPTX1	0.0596851	0.72877	3.61002	0.679427	UP
hsa-miR-296-5p	16.3485	24.8341	1.51905	0.603167	0.631192	NEUTRAL	NPTX1	0.0596851	0.72877	3.61002	0.679427	UP
hsa-miR-330-5p	65.3939	89.9166	1.375	0.459432	0.651801	NEUTRAL	NPTX1	0.0596851	0.72877	3.61002	0.679427	UP
hsa-miR-484	1332.4	1514.02	1.13631	0.184361	0.824672	NEUTRAL	NPTX1	0.0596851	0.72877	3.61002	0.679427	UP
hsa-miR-5787	12.8452	12.8452	1	0	1	NEUTRAL	RARRES2	0.424886	5.0821	3.58028	0.653029	UP
hsa-miR-5787	12.8452	12.8452	1	0	1	NEUTRAL	RARRES2	0.424886	5.0821	3.58028	0.653029	UP
hsa-miR-4516	15.1807	63.3698	4.17436	2.06155	0.0638169	UP	RTN4RL2	0.0414805	0.494344	3.57501	0.99965	UP
hsa-miR-324-5p	22.1872	55.6627	2.50877	1.32698	0.222466	UP	RTN4RL2	0.0414805	0.494344	3.57501	0.99965	UP
hsa-miR-3648	5.83874	9.41984	1.61333	0.690045	0.694951	NEUTRAL	RTN4RL2	0.0414805	0.494344	3.57501	0.99965	UP
hsa-miR-339-3p	864.134	543.782	0.629279	-0.668228	0.426248	NEUTRAL	RTN4RL2	0.0414805	0.494344	3.57501	0.99965	UP
hsa-miR-1285-3p	119.11	183.259	1.53856	0.621583	0.508504	NEUTRAL	METTL7A	0.434319	5.10576	3.5553	0.0700122	UP
hsa-miR-1285-3p	119.11	183.259	1.53856	0.621583	0.508504	NEUTRAL	METTL7A	0.434319	5.10576	3.5553	0.0700122	UP
hsa-miR-1285-3p	119.11	183.259	1.53856	0.621583	0.508504	NEUTRAL	METTL7A	0.434319	5.10576	3.5553	0.0700122	UP
hsa-miR-485-5p	217.201	146.436	0.674194	-0.568765	0.536305	NEUTRAL	STON2	0.0452644	0.529492	3.54816	0.428291	UP
hsa-miR-485-5p	217.201	146.436	0.674194	-0.568765	0.536305	NEUTRAL	STON2	0.0452644	0.529492	3.54816	0.428291	UP
hsa-miR-485-5p	217.201	146.436	0.674194	-0.568765	0.536305	NEUTRAL	STON2	0.0452644	0.529492	3.54816	0.428291	UP
hsa-miR-485-5p	217.201	146.436	0.674194	-0.568765	0.536305	NEUTRAL	STON2	0.0452644	0.529492	3.54816	0.428291	UP
hsa-miR-4508	179.833	108.756	0.604762	-0.725561	0.439635	NEUTRAL	STON2	0.0452644	0.529492	3.54816	0.428291	UP
hsa-miR-4516	15.1807	63.3698	4.17436	2.06155	0.0638169	UP	KCNIP3	0.401291	4.69041	3.54699	0.0600868	UP
hsa-miR-3960	12.8452	3.4254	0.266667	-1.90689	0.182003	DOWN	KCNIP3	0.401291	4.69041	3.54699	0.0600868	UP
hsa-miR-4466	12.8452	21.4087	1.66667	0.736966	0.567146	NEUTRAL	GAS1	9.93888	110.87	3.47964	0.0106919	UP
hsa-miR-4508	179.833	108.756	0.604762	-0.725561	0.439635	NEUTRAL	GAS1	9.93888	110.87	3.47964	0.0106919	UP
hsa-miR-4532	44613.8	18135.8	0.406505	-1.29865	0.174811	DOWN	GAS1	9.93888	110.87	3.47964	0.0106919	UP
hsa-miR-3960	12.8452	3.4254	0.266667	-1.90689	0.182003	DOWN	GAS1	9.93888	110.87	3.47964	0.0106919	UP
hsa-miR-5787	12.8452	12.8452	1	0	1	NEUTRAL	EFHD1	0.446298	4.8994	3.45653	0.99965	UP
hsa-miR-5787	12.8452	12.8452	1	0	1	NEUTRAL	EFHD1	0.446298	4.8994	3.45653	0.99965	UP
hsa-miR-5787	12.8452	12.8452	1	0	1	NEUTRAL	EFHD1	0.446298	4.8994	3.45653	0.99965	UP
hsa-miR-5787	12.8452	12.8452	1	0	1	NEUTRAL	EFHD1	0.446298	4.8994	3.45653	0.99965	UP
hsa-miR-5787	12.8452	12.8452	1	0	1	NEUTRAL	EFHD1	0.446298	4.8994	3.45653	0.99965	UP
hsa-miR-5787	12.8452	12.8452	1	0	1	NEUTRAL	EFHD1	0.446298	4.8994	3.45653	0.99965	UP
hsa-miR-940	5.83874	15.4143	2.64	1.40054	0.31347	UP	DISP2	0.0644865	0.691622	3.42291	0.99965	UP
hsa-miR-330-5p	65.3939	89.9166	1.375	0.459432	0.651801	NEUTRAL	DISP2	0.0644865	0.691622	3.42291	0.99965	UP
hsa-miR-214-3p	1193.44	669.665	0.561122	-0.833614	0.317743	NEUTRAL	DISP2	0.0644865	0.691622	3.42291	0.99965	UP
hsa-miR-210-3p	2991.77	1060.16	0.354359	-1.49672	0.0746831	DOWN	DISP2	0.0644865	0.691622	3.42291	0.99965	UP
hsa-miR-3960	12.8452	3.4254	0.266667	-1.90689	0.182003	DOWN	DISP2	0.0644865	0.691622	3.42291	0.99965	UP
hsa-miR-3909	429.731	447.014	1.04022	0.0568851	0.95088	NEUTRAL	SLC38A3	0.110322	1.17277	3.41012	0.674203	UP
hsa-miR-339-5p	39.7034	39.392	0.992157	-0.0113599	1	NEUTRAL	MRO	0.0447823	0.475192	3.40751	0.803655	UP
hsa-miR-339-5p	39.7034	39.392	0.992157	-0.0113599	1	NEUTRAL	MRO	0.0447823	0.475192	3.40751	0.803655	UP
hsa-miR-331-3p	391.196	240.634	0.615124	-0.70105	0.42477	NEUTRAL	MRO	0.0447823	0.475192	3.40751	0.803655	UP
hsa-miR-331-3p	391.196	240.634	0.615124	-0.70105	0.42477	NEUTRAL	MRO	0.0447823	0.475192	3.40751	0.803655	UP
hsa-miR-331-3p	391.196	240.634	0.615124	-0.70105	0.42477	NEUTRAL	MRO	0.0447823	0.475192	3.40751	0.803655	UP
hsa-miR-331-3p	391.196	240.634	0.615124	-0.70105	0.42477	NEUTRAL	MRO	0.0447823	0.475192	3.40751	0.803655	UP
hsa-miR-331-3p	391.196	240.634	0.615124	-0.70105	0.42477	NEUTRAL	MRO	0.0447823	0.475192	3.40751	0.803655	UP
hsa-miR-331-3p	391.196	240.634	0.615124	-0.70105	0.42477	NEUTRAL	MRO	0.0447823	0.475192	3.40751	0.803655	UP
hsa-miR-331-3p	391.196	240.634	0.615124	-0.70105	0.42477	NEUTRAL	MRO	0.0447823	0.475192	3.40751	0.803655	UP
hsa-miR-331-3p	391.196	240.634	0.615124	-0.70105	0.42477	NEUTRAL	MRO	0.0447823	0.475192	3.40751	0.803655	UP
hsa-miR-331-3p	391.196	240.634	0.615124	-0.70105	0.42477	NEUTRAL	MRO	0.0447823	0.475192	3.40751	0.803655	UP
hsa-miR-331-3p	391.196	240.634	0.615124	-0.70105	0.42477	NEUTRAL	MRO	0.0447823	0.475192	3.40751	0.803655	UP
hsa-miR-331-3p	391.196	240.634	0.615124	-0.70105	0.42477	NEUTRAL	MRO	0.0447823	0.475192	3.40751	0.803655	UP
hsa-miR-1307-3p	231.214	429.887	1.85926	0.894728	0.309031	NEUTRAL	TRNP1	0.943029	9.83002	3.38182	0.0846565	UP
hsa-miR-1307-3p	231.214	429.887	1.85926	0.894728	0.309031	NEUTRAL	TRNP1	0.943029	9.83002	3.38182	0.0846565	UP
hsa-miR-1268b	72.4004	113.038	1.56129	0.642739	0.51546	NEUTRAL	TRNP1	0.943029	9.83002	3.38182	0.0846565	UP
hsa-miR-1268b	72.4004	113.038	1.56129	0.642739	0.51546	NEUTRAL	TRNP1	0.943029	9.83002	3.38182	0.0846565	UP
hsa-miR-5787	12.8452	12.8452	1	0	1	NEUTRAL	TRNP1	0.943029	9.83002	3.38182	0.0846565	UP
hsa-miR-5787	12.8452	12.8452	1	0	1	NEUTRAL	TRNP1	0.943029	9.83002	3.38182	0.0846565	UP
hsa-miR-210-5p	343.318	101.049	0.294331	-1.76449	0.0554073	DOWN	TRNP1	0.943029	9.83002	3.38182	0.0846565	UP
hsa-miR-210-5p	343.318	101.049	0.294331	-1.76449	0.0554073	DOWN	TRNP1	0.943029	9.83002	3.38182	0.0846565	UP
hsa-miR-324-5p	22.1872	55.6627	2.50877	1.32698	0.222466	UP	PODN	0.907162	9.24019	3.34849	0.0644964	UP
hsa-miR-874-5p	15.1807	30.8286	2.03077	1.02203	0.386358	UP	PODN	0.907162	9.24019	3.34849	0.0644964	UP
hsa-miR-874-5p	15.1807	30.8286	2.03077	1.02203	0.386358	UP	PODN	0.907162	9.24019	3.34849	0.0644964	UP
hsa-miR-874-5p	15.1807	30.8286	2.03077	1.02203	0.386358	UP	PODN	0.907162	9.24019	3.34849	0.0644964	UP
hsa-miR-874-5p	15.1807	30.8286	2.03077	1.02203	0.386358	UP	PODN	0.907162	9.24019	3.34849	0.0644964	UP
hsa-miR-1268b	72.4004	113.038	1.56129	0.642739	0.51546	NEUTRAL	PODN	0.907162	9.24019	3.34849	0.0644964	UP
hsa-miR-1268b	72.4004	113.038	1.56129	0.642739	0.51546	NEUTRAL	PODN	0.907162	9.24019	3.34849	0.0644964	UP
hsa-miR-1268b	72.4004	113.038	1.56129	0.642739	0.51546	NEUTRAL	PODN	0.907162	9.24019	3.34849	0.0644964	UP
hsa-miR-1268b	72.4004	113.038	1.56129	0.642739	0.51546	NEUTRAL	PODN	0.907162	9.24019	3.34849	0.0644964	UP
hsa-miR-330-5p	65.3939	89.9166	1.375	0.459432	0.651801	NEUTRAL	PODN	0.907162	9.24019	3.34849	0.0644964	UP
hsa-miR-330-5p	65.3939	89.9166	1.375	0.459432	0.651801	NEUTRAL	PODN	0.907162	9.24019	3.34849	0.0644964	UP
hsa-miR-330-5p	65.3939	89.9166	1.375	0.459432	0.651801	NEUTRAL	PODN	0.907162	9.24019	3.34849	0.0644964	UP
hsa-miR-330-5p	65.3939	89.9166	1.375	0.459432	0.651801	NEUTRAL	PODN	0.907162	9.24019	3.34849	0.0644964	UP
hsa-miR-330-5p	65.3939	89.9166	1.375	0.459432	0.651801	NEUTRAL	PODN	0.907162	9.24019	3.34849	0.0644964	UP
hsa-miR-941	1125.71	1156.07	1.02697	0.0383954	0.965034	NEUTRAL	PODN	0.907162	9.24019	3.34849	0.0644964	UP
hsa-miR-941	1125.71	1156.07	1.02697	0.0383954	0.965034	NEUTRAL	PODN	0.907162	9.24019	3.34849	0.0644964	UP
hsa-miR-941	1125.71	1156.07	1.02697	0.0383954	0.965034	NEUTRAL	PODN	0.907162	9.24019	3.34849	0.0644964	UP
hsa-miR-941	1125.71	1156.07	1.02697	0.0383954	0.965034	NEUTRAL	PODN	0.907162	9.24019	3.34849	0.0644964	UP
hsa-miR-1469	1.16775	8.56349	7.33333	2.87447	0.128943	UP	SEPT4	0.308723	2.91452	3.23887	0.0106919	UP
hsa-miR-1469	1.16775	8.56349	7.33333	2.87447	0.128943	UP	SEPT4	0.308723	2.91452	3.23887	0.0106919	UP
hsa-miR-1469	1.16775	8.56349	7.33333	2.87447	0.128943	UP	SEPT4	0.308723	2.91452	3.23887	0.0106919	UP
hsa-miR-1469	1.16775	8.56349	7.33333	2.87447	0.128943	UP	SEPT4	0.308723	2.91452	3.23887	0.0106919	UP
hsa-miR-1469	1.16775	8.56349	7.33333	2.87447	0.128943	UP	SEPT4	0.308723	2.91452	3.23887	0.0106919	UP
hsa-miR-1469	1.16775	8.56349	7.33333	2.87447	0.128943	UP	SEPT4	0.308723	2.91452	3.23887	0.0106919	UP
hsa-miR-1469	1.16775	8.56349	7.33333	2.87447	0.128943	UP	SEPT4	0.308723	2.91452	3.23887	0.0106919	UP
hsa-miR-1469	1.16775	8.56349	7.33333	2.87447	0.128943	UP	SEPT4	0.308723	2.91452	3.23887	0.0106919	UP
hsa-miR-1469	1.16775	8.56349	7.33333	2.87447	0.128943	UP	SEPT4	0.308723	2.91452	3.23887	0.0106919	UP
hsa-miR-370-3p	175.162	376.793	2.15111	1.10508	0.216401	UP	SEPT4	0.308723	2.91452	3.23887	0.0106919	UP
hsa-miR-3151-3p	10.5097	11.1325	1.05926	0.0830557	1	NEUTRAL	SEPT4	0.308723	2.91452	3.23887	0.0106919	UP
hsa-miR-3151-3p	10.5097	11.1325	1.05926	0.0830557	1	NEUTRAL	SEPT4	0.308723	2.91452	3.23887	0.0106919	UP
hsa-miR-1304-3p	161.149	160.994	0.999034	-0.00139458	1	NEUTRAL	SEPT4	0.308723	2.91452	3.23887	0.0106919	UP
hsa-miR-6716-3p	12.8452	8.56349	0.666667	-0.584963	0.701258	NEUTRAL	SEPT4	0.308723	2.91452	3.23887	0.0106919	UP
hsa-miR-6716-3p	12.8452	8.56349	0.666667	-0.584963	0.701258	NEUTRAL	SEPT4	0.308723	2.91452	3.23887	0.0106919	UP
hsa-miR-6716-3p	12.8452	8.56349	0.666667	-0.584963	0.701258	NEUTRAL	SEPT4	0.308723	2.91452	3.23887	0.0106919	UP
hsa-miR-6716-3p	12.8452	8.56349	0.666667	-0.584963	0.701258	NEUTRAL	SEPT4	0.308723	2.91452	3.23887	0.0106919	UP
hsa-miR-6716-3p	12.8452	8.56349	0.666667	-0.584963	0.701258	NEUTRAL	SEPT4	0.308723	2.91452	3.23887	0.0106919	UP
hsa-miR-6716-3p	12.8452	8.56349	0.666667	-0.584963	0.701258	NEUTRAL	SEPT4	0.308723	2.91452	3.23887	0.0106919	UP
hsa-miR-6716-3p	12.8452	8.56349	0.666667	-0.584963	0.701258	NEUTRAL	SEPT4	0.308723	2.91452	3.23887	0.0106919	UP
hsa-miR-6716-3p	12.8452	8.56349	0.666667	-0.584963	0.701258	NEUTRAL	SEPT4	0.308723	2.91452	3.23887	0.0106919	UP
hsa-miR-6716-3p	12.8452	8.56349	0.666667	-0.584963	0.701258	NEUTRAL	SEPT4	0.308723	2.91452	3.23887	0.0106919	UP
hsa-miR-6716-3p	12.8452	8.56349	0.666667	-0.584963	0.701258	NEUTRAL	SEPT4	0.308723	2.91452	3.23887	0.0106919	UP
hsa-miR-6716-3p	12.8452	8.56349	0.666667	-0.584963	0.701258	NEUTRAL	SEPT4	0.308723	2.91452	3.23887	0.0106919	UP
hsa-miR-6716-3p	12.8452	8.56349	0.666667	-0.584963	0.701258	NEUTRAL	SEPT4	0.308723	2.91452	3.23887	0.0106919	UP
hsa-miR-6716-3p	12.8452	8.56349	0.666667	-0.584963	0.701258	NEUTRAL	SEPT4	0.308723	2.91452	3.23887	0.0106919	UP
hsa-miR-6716-3p	12.8452	8.56349	0.666667	-0.584963	0.701258	NEUTRAL	SEPT4	0.308723	2.91452	3.23887	0.0106919	UP
hsa-miR-125a-3p	106.265	107.044	1.00733	0.0105307	1	NEUTRAL	EFNB2	1.78044	16.7718	3.23573	0.0106919	UP
hsa-miR-615-3p	228.879	602.013	2.63027	1.39521	0.110374	UP	IMPA2	2.4529	22.7698	3.21456	0.0319582	UP
hsa-miR-1285-3p	119.11	183.259	1.53856	0.621583	0.508504	NEUTRAL	IMPA2	2.4529	22.7698	3.21456	0.0319582	UP
hsa-miR-766-3p	12.8452	10.2762	0.8	-0.321928	0.865138	NEUTRAL	IMPA2	2.4529	22.7698	3.21456	0.0319582	UP
hsa-miR-766-3p	12.8452	10.2762	0.8	-0.321928	0.865138	NEUTRAL	IMPA2	2.4529	22.7698	3.21456	0.0319582	UP
hsa-miR-550a-5p	14.013	12.8452	0.916667	-0.125531	0.987787	NEUTRAL	FAM46B	0.690703	6.37193	3.20559	0.135774	UP
hsa-miR-5787	12.8452	12.8452	1	0	1	NEUTRAL	BRINP1	1.2739	11.7396	3.20406	0.0997912	UP
hsa-miR-5787	12.8452	12.8452	1	0	1	NEUTRAL	BRINP1	1.2739	11.7396	3.20406	0.0997912	UP
hsa-miR-2277-3p	8.17424	12.8452	1.57143	0.652077	0.672249	NEUTRAL	ADAMTS9	0.0747346	0.687295	3.20108	0.857712	UP
hsa-miR-2277-3p	8.17424	12.8452	1.57143	0.652077	0.672249	NEUTRAL	ADAMTS9	0.0747346	0.687295	3.20108	0.857712	UP
hsa-miR-2277-3p	8.17424	12.8452	1.57143	0.652077	0.672249	NEUTRAL	ADAMTS9	0.0747346	0.687295	3.20108	0.857712	UP
hsa-miR-2277-3p	8.17424	12.8452	1.57143	0.652077	0.672249	NEUTRAL	ADAMTS9	0.0747346	0.687295	3.20108	0.857712	UP
hsa-miR-370-3p	175.162	376.793	2.15111	1.10508	0.216401	UP	CCDC69	0.493707	4.50165	3.18873	0.99965	UP
hsa-miR-370-3p	175.162	376.793	2.15111	1.10508	0.216401	UP	CCDC69	0.493707	4.50165	3.18873	0.99965	UP
hsa-miR-370-3p	175.162	376.793	2.15111	1.10508	0.216401	UP	CCDC69	0.493707	4.50165	3.18873	0.99965	UP
hsa-miR-370-3p	175.162	376.793	2.15111	1.10508	0.216401	UP	CCDC69	0.493707	4.50165	3.18873	0.99965	UP
hsa-miR-665	35.0325	53.95	1.54	0.62293	0.564592	NEUTRAL	CCDC69	0.493707	4.50165	3.18873	0.99965	UP
hsa-miR-766-3p	12.8452	10.2762	0.8	-0.321928	0.865138	NEUTRAL	CCDC69	0.493707	4.50165	3.18873	0.99965	UP
hsa-miR-766-3p	12.8452	10.2762	0.8	-0.321928	0.865138	NEUTRAL	CCDC69	0.493707	4.50165	3.18873	0.99965	UP
hsa-miR-766-3p	12.8452	10.2762	0.8	-0.321928	0.865138	NEUTRAL	CCDC69	0.493707	4.50165	3.18873	0.99965	UP
hsa-miR-149-5p	416.886	306.573	0.735387	-0.443423	0.61018	NEUTRAL	CCDC69	0.493707	4.50165	3.18873	0.99965	UP
hsa-miR-370-3p	175.162	376.793	2.15111	1.10508	0.216401	UP	CTD-2224J9.8	0.0585931	0.531315	3.18076	0.99965	UP
hsa-miR-3176	14.013	26.5468	1.89444	0.921775	0.44803	NEUTRAL	DUSP23	11.6541	105.192	3.17411	0.0106919	UP
hsa-miR-3176	14.013	26.5468	1.89444	0.921775	0.44803	NEUTRAL	DUSP23	11.6541	105.192	3.17411	0.0106919	UP
hsa-miR-2277-5p	36.2002	58.2317	1.6086	0.685808	0.520897	NEUTRAL	HAS1	6.27894	55.6208	3.14703	0.0106919	UP
hsa-miR-2277-5p	36.2002	58.2317	1.6086	0.685808	0.520897	NEUTRAL	HAS1	6.27894	55.6208	3.14703	0.0106919	UP
hsa-miR-2277-5p	36.2002	58.2317	1.6086	0.685808	0.520897	NEUTRAL	HAS1	6.27894	55.6208	3.14703	0.0106919	UP
hsa-miR-3074-5p	31.5292	27.4032	0.869136	-0.202346	0.883564	NEUTRAL	HAS1	6.27894	55.6208	3.14703	0.0106919	UP
hsa-miR-3074-5p	31.5292	27.4032	0.869136	-0.202346	0.883564	NEUTRAL	HAS1	6.27894	55.6208	3.14703	0.0106919	UP
hsa-miR-3074-5p	31.5292	27.4032	0.869136	-0.202346	0.883564	NEUTRAL	HAS1	6.27894	55.6208	3.14703	0.0106919	UP
hsa-miR-3074-5p	31.5292	27.4032	0.869136	-0.202346	0.883564	NEUTRAL	HAS1	6.27894	55.6208	3.14703	0.0106919	UP
hsa-miR-3074-5p	31.5292	27.4032	0.869136	-0.202346	0.883564	NEUTRAL	HAS1	6.27894	55.6208	3.14703	0.0106919	UP
hsa-miR-2467-5p	10.5097	34.254	3.25926	1.70454	0.152536	UP	C3	2.75572	23.55	3.09522	0.0106919	UP
hsa-miR-1268b	72.4004	113.038	1.56129	0.642739	0.51546	NEUTRAL	C3	2.75572	23.55	3.09522	0.0106919	UP
hsa-miR-339-5p	39.7034	39.392	0.992157	-0.0113599	1	NEUTRAL	C3	2.75572	23.55	3.09522	0.0106919	UP
hsa-miR-5787	12.8452	12.8452	1	0	1	NEUTRAL	CFD	0.367365	3.10759	3.08051	0.566277	UP
hsa-miR-370-3p	175.162	376.793	2.15111	1.10508	0.216401	UP	PALM	0.373117	3.02569	3.01956	0.172196	UP
hsa-miR-370-3p	175.162	376.793	2.15111	1.10508	0.216401	UP	PALM	0.373117	3.02569	3.01956	0.172196	UP
hsa-miR-370-3p	175.162	376.793	2.15111	1.10508	0.216401	UP	PALM	0.373117	3.02569	3.01956	0.172196	UP
hsa-miR-370-3p	175.162	376.793	2.15111	1.10508	0.216401	UP	PALM	0.373117	3.02569	3.01956	0.172196	UP
hsa-miR-370-3p	175.162	376.793	2.15111	1.10508	0.216401	UP	PALM	0.373117	3.02569	3.01956	0.172196	UP
hsa-miR-370-3p	175.162	376.793	2.15111	1.10508	0.216401	UP	PALM	0.373117	3.02569	3.01956	0.172196	UP
hsa-miR-1268b	72.4004	113.038	1.56129	0.642739	0.51546	NEUTRAL	PALM	0.373117	3.02569	3.01956	0.172196	UP
hsa-miR-1268b	72.4004	113.038	1.56129	0.642739	0.51546	NEUTRAL	PALM	0.373117	3.02569	3.01956	0.172196	UP
hsa-miR-1268b	72.4004	113.038	1.56129	0.642739	0.51546	NEUTRAL	PALM	0.373117	3.02569	3.01956	0.172196	UP
hsa-miR-1268b	72.4004	113.038	1.56129	0.642739	0.51546	NEUTRAL	PALM	0.373117	3.02569	3.01956	0.172196	UP
hsa-miR-1268b	72.4004	113.038	1.56129	0.642739	0.51546	NEUTRAL	PALM	0.373117	3.02569	3.01956	0.172196	UP
hsa-miR-1268b	72.4004	113.038	1.56129	0.642739	0.51546	NEUTRAL	PALM	0.373117	3.02569	3.01956	0.172196	UP
hsa-miR-1268b	72.4004	113.038	1.56129	0.642739	0.51546	NEUTRAL	PALM	0.373117	3.02569	3.01956	0.172196	UP
hsa-miR-665	35.0325	53.95	1.54	0.62293	0.564592	NEUTRAL	PALM	0.373117	3.02569	3.01956	0.172196	UP
hsa-miR-665	35.0325	53.95	1.54	0.62293	0.564592	NEUTRAL	PALM	0.373117	3.02569	3.01956	0.172196	UP
hsa-miR-665	35.0325	53.95	1.54	0.62293	0.564592	NEUTRAL	PALM	0.373117	3.02569	3.01956	0.172196	UP
hsa-miR-665	35.0325	53.95	1.54	0.62293	0.564592	NEUTRAL	PALM	0.373117	3.02569	3.01956	0.172196	UP
hsa-miR-665	35.0325	53.95	1.54	0.62293	0.564592	NEUTRAL	PALM	0.373117	3.02569	3.01956	0.172196	UP
hsa-miR-665	35.0325	53.95	1.54	0.62293	0.564592	NEUTRAL	PALM	0.373117	3.02569	3.01956	0.172196	UP
hsa-miR-1307-5p	579.203	1323.06	2.28427	1.19174	0.156107	UP	MMP15	0.341381	2.75461	3.01239	0.318416	UP
hsa-miR-7706	54.8842	113.038	2.05957	1.04235	0.295195	UP	MMP15	0.341381	2.75461	3.01239	0.318416	UP
hsa-miR-4466	12.8452	21.4087	1.66667	0.736966	0.567146	NEUTRAL	MMP15	0.341381	2.75461	3.01239	0.318416	UP
hsa-miR-5787	12.8452	12.8452	1	0	1	NEUTRAL	MMP15	0.341381	2.75461	3.01239	0.318416	UP
hsa-miR-6852-5p	15.1807	12.8452	0.846154	-0.241008	0.903482	NEUTRAL	MMP15	0.341381	2.75461	3.01239	0.318416	UP
hsa-miR-331-3p	391.196	240.634	0.615124	-0.70105	0.42477	NEUTRAL	MMP15	0.341381	2.75461	3.01239	0.318416	UP
hsa-miR-769-5p	2483.8	3139.37	1.26394	0.337928	0.684112	NEUTRAL	KCNH1	0.0863273	0.690194	2.99911	0.99965	UP
hsa-miR-1306-5p	10.5097	8.56349	0.814815	-0.295456	0.902973	NEUTRAL	KCNH1	0.0863273	0.690194	2.99911	0.99965	UP
hsa-miR-1306-5p	10.5097	8.56349	0.814815	-0.295456	0.902973	NEUTRAL	KCNH1	0.0863273	0.690194	2.99911	0.99965	UP
hsa-miR-5787	12.8452	12.8452	1	0	1	NEUTRAL	PRR15	0.558829	4.45665	2.99548	0.41734	UP
hsa-miR-665	35.0325	53.95	1.54	0.62293	0.564592	NEUTRAL	MCTP1	0.528339	4.20687	2.99321	0.25403	UP
hsa-miR-877-5p	19.8517	9.41984	0.47451	-1.07549	0.396051	DOWN	INHBE	0.197373	1.55179	2.97494	0.93157	UP
hsa-miR-877-5p	19.8517	9.41984	0.47451	-1.07549	0.396051	DOWN	INHBE	0.197373	1.55179	2.97494	0.93157	UP
hsa-miR-877-5p	19.8517	9.41984	0.47451	-1.07549	0.396051	DOWN	INHBE	0.197373	1.55179	2.97494	0.93157	UP
hsa-miR-6842-3p	3.50325	8.56349	2.44444	1.28951	0.444061	UP	CES1P1	0.0594147	0.467106	2.97486	0.99965	UP
hsa-miR-1469	1.16775	8.56349	7.33333	2.87447	0.128943	UP	NOG	1.81131	14.0945	2.96002	0.0846565	UP
hsa-miR-4466	12.8452	21.4087	1.66667	0.736966	0.567146	NEUTRAL	NOG	1.81131	14.0945	2.96002	0.0846565	UP
hsa-miR-3960	12.8452	3.4254	0.266667	-1.90689	0.182003	DOWN	NOG	1.81131	14.0945	2.96002	0.0846565	UP
hsa-miR-665	35.0325	53.95	1.54	0.62293	0.564592	NEUTRAL	PLEKHB1	0.0689642	0.512913	2.8948	0.236215	UP
hsa-miR-3151-3p	10.5097	11.1325	1.05926	0.0830557	1	NEUTRAL	PLEKHB1	0.0689642	0.512913	2.8948	0.236215	UP
hsa-miR-3151-3p	10.5097	11.1325	1.05926	0.0830557	1	NEUTRAL	PLEKHB1	0.0689642	0.512913	2.8948	0.236215	UP
hsa-miR-3151-3p	10.5097	11.1325	1.05926	0.0830557	1	NEUTRAL	PLEKHB1	0.0689642	0.512913	2.8948	0.236215	UP
hsa-miR-3151-3p	10.5097	11.1325	1.05926	0.0830557	1	NEUTRAL	PLEKHB1	0.0689642	0.512913	2.8948	0.236215	UP
hsa-miR-3151-3p	10.5097	11.1325	1.05926	0.0830557	1	NEUTRAL	PLEKHB1	0.0689642	0.512913	2.8948	0.236215	UP
hsa-miR-5787	12.8452	12.8452	1	0	1	NEUTRAL	PLEKHB1	0.0689642	0.512913	2.8948	0.236215	UP
hsa-miR-133a-3p	31.5292	28.2595	0.896296	-0.157952	0.916481	NEUTRAL	PLEKHB1	0.0689642	0.512913	2.8948	0.236215	UP
hsa-miR-138-5p	10735.1	9257.99	0.862403	-0.213567	0.804777	NEUTRAL	PLEKHB1	0.0689642	0.512913	2.8948	0.236215	UP
hsa-miR-138-5p	10735.1	9257.99	0.862403	-0.213567	0.804777	NEUTRAL	PLEKHB1	0.0689642	0.512913	2.8948	0.236215	UP
hsa-miR-138-5p	10735.1	9257.99	0.862403	-0.213567	0.804777	NEUTRAL	PLEKHB1	0.0689642	0.512913	2.8948	0.236215	UP
hsa-miR-138-5p	10735.1	9257.99	0.862403	-0.213567	0.804777	NEUTRAL	PLEKHB1	0.0689642	0.512913	2.8948	0.236215	UP
hsa-miR-138-5p	10735.1	9257.99	0.862403	-0.213567	0.804777	NEUTRAL	PLEKHB1	0.0689642	0.512913	2.8948	0.236215	UP
hsa-miR-138-5p	10735.1	9257.99	0.862403	-0.213567	0.804777	NEUTRAL	PLEKHB1	0.0689642	0.512913	2.8948	0.236215	UP
hsa-miR-6824-3p	2.3355	12.8452	5.5	2.45943	0.118936	UP	PLIN1	0.0618103	0.45596	2.88299	0.99965	UP
hsa-miR-6824-3p	2.3355	12.8452	5.5	2.45943	0.118936	UP	PLIN1	0.0618103	0.45596	2.88299	0.99965	UP
hsa-miR-940	5.83874	15.4143	2.64	1.40054	0.31347	UP	PLIN1	0.0618103	0.45596	2.88299	0.99965	UP
hsa-miR-330-3p	5.83874	11.9889	2.05333	1.03797	0.487074	UP	PLIN1	0.0618103	0.45596	2.88299	0.99965	UP
hsa-miR-330-3p	5.83874	11.9889	2.05333	1.03797	0.487074	UP	PLIN1	0.0618103	0.45596	2.88299	0.99965	UP
hsa-miR-3605-3p	29.1937	54.8063	1.87733	0.908685	0.398783	NEUTRAL	PLIN1	0.0618103	0.45596	2.88299	0.99965	UP
hsa-miR-3605-3p	29.1937	54.8063	1.87733	0.908685	0.398783	NEUTRAL	PLIN1	0.0618103	0.45596	2.88299	0.99965	UP
hsa-miR-665	35.0325	53.95	1.54	0.62293	0.564592	NEUTRAL	PLIN1	0.0618103	0.45596	2.88299	0.99965	UP
hsa-miR-665	35.0325	53.95	1.54	0.62293	0.564592	NEUTRAL	PLIN1	0.0618103	0.45596	2.88299	0.99965	UP
hsa-miR-665	35.0325	53.95	1.54	0.62293	0.564592	NEUTRAL	PLIN1	0.0618103	0.45596	2.88299	0.99965	UP
hsa-miR-3615	81.7424	93.342	1.1419	0.191442	0.856957	NEUTRAL	PLIN1	0.0618103	0.45596	2.88299	0.99965	UP
hsa-miR-3615	81.7424	93.342	1.1419	0.191442	0.856957	NEUTRAL	PLIN1	0.0618103	0.45596	2.88299	0.99965	UP
hsa-miR-5787	12.8452	12.8452	1	0	1	NEUTRAL	PLIN1	0.0618103	0.45596	2.88299	0.99965	UP
hsa-miR-5787	12.8452	12.8452	1	0	1	NEUTRAL	PLIN1	0.0618103	0.45596	2.88299	0.99965	UP
hsa-miR-4508	179.833	108.756	0.604762	-0.725561	0.439635	NEUTRAL	PLIN1	0.0618103	0.45596	2.88299	0.99965	UP
hsa-miR-4508	179.833	108.756	0.604762	-0.725561	0.439635	NEUTRAL	PLIN1	0.0618103	0.45596	2.88299	0.99965	UP
hsa-miR-6852-5p	15.1807	12.8452	0.846154	-0.241008	0.903482	NEUTRAL	BCRP3	0.0654504	0.474961	2.85933	0.99965	UP
hsa-miR-1260b	15.1807	8.56349	0.564103	-0.825971	0.546679	NEUTRAL	FPR1	2.64324	18.965	2.84296	0.198286	UP
hsa-miR-1260b	15.1807	8.56349	0.564103	-0.825971	0.546679	NEUTRAL	FPR1	2.64324	18.965	2.84296	0.198286	UP
hsa-miR-345-5p	463.596	673.09	1.45189	0.537931	0.526699	NEUTRAL	SLC2A9	0.255843	1.8236	2.83346	0.103864	UP
hsa-miR-490-3p	35.0325	23.9778	0.684444	-0.546995	0.635402	NEUTRAL	MME	15.4163	107.369	2.80004	0.0106919	UP
hsa-miR-490-3p	35.0325	23.9778	0.684444	-0.546995	0.635402	NEUTRAL	MME	15.4163	107.369	2.80004	0.0106919	UP
hsa-miR-93-3p	37.3679	16.2706	0.435417	-1.19953	0.287475	DOWN	MME	15.4163	107.369	2.80004	0.0106919	UP
hsa-miR-125a-5p	25628.6	48257.8	1.88297	0.91301	0.344622	NEUTRAL	COL11A1	13.1177	91.1296	2.7964	0.0363525	UP
hsa-miR-125a-5p	25628.6	48257.8	1.88297	0.91301	0.344622	NEUTRAL	COL11A1	13.1177	91.1296	2.7964	0.0363525	UP
hsa-miR-125a-5p	25628.6	48257.8	1.88297	0.91301	0.344622	NEUTRAL	COL11A1	13.1177	91.1296	2.7964	0.0363525	UP
hsa-miR-125a-5p	25628.6	48257.8	1.88297	0.91301	0.344622	NEUTRAL	COL11A1	13.1177	91.1296	2.7964	0.0363525	UP
hsa-miR-125a-5p	25628.6	48257.8	1.88297	0.91301	0.344622	NEUTRAL	COL11A1	13.1177	91.1296	2.7964	0.0363525	UP
hsa-miR-665	35.0325	53.95	1.54	0.62293	0.564592	NEUTRAL	COL11A1	13.1177	91.1296	2.7964	0.0363525	UP
hsa-miR-665	35.0325	53.95	1.54	0.62293	0.564592	NEUTRAL	COL11A1	13.1177	91.1296	2.7964	0.0363525	UP
hsa-miR-665	35.0325	53.95	1.54	0.62293	0.564592	NEUTRAL	COL11A1	13.1177	91.1296	2.7964	0.0363525	UP
hsa-miR-665	35.0325	53.95	1.54	0.62293	0.564592	NEUTRAL	COL11A1	13.1177	91.1296	2.7964	0.0363525	UP
hsa-miR-665	35.0325	53.95	1.54	0.62293	0.564592	NEUTRAL	COL11A1	13.1177	91.1296	2.7964	0.0363525	UP
hsa-miR-3176	14.013	26.5468	1.89444	0.921775	0.44803	NEUTRAL	TSC22D3	16.8342	113.732	2.75616	0.0106919	UP
hsa-miR-3176	14.013	26.5468	1.89444	0.921775	0.44803	NEUTRAL	TSC22D3	16.8342	113.732	2.75616	0.0106919	UP
hsa-miR-3176	14.013	26.5468	1.89444	0.921775	0.44803	NEUTRAL	TSC22D3	16.8342	113.732	2.75616	0.0106919	UP
hsa-miR-3176	14.013	26.5468	1.89444	0.921775	0.44803	NEUTRAL	TSC22D3	16.8342	113.732	2.75616	0.0106919	UP
hsa-miR-3176	14.013	26.5468	1.89444	0.921775	0.44803	NEUTRAL	TSC22D3	16.8342	113.732	2.75616	0.0106919	UP
hsa-miR-3176	14.013	26.5468	1.89444	0.921775	0.44803	NEUTRAL	TSC22D3	16.8342	113.732	2.75616	0.0106919	UP
hsa-miR-3176	14.013	26.5468	1.89444	0.921775	0.44803	NEUTRAL	TSC22D3	16.8342	113.732	2.75616	0.0106919	UP
hsa-miR-3176	14.013	26.5468	1.89444	0.921775	0.44803	NEUTRAL	TSC22D3	16.8342	113.732	2.75616	0.0106919	UP
hsa-miR-3176	14.013	26.5468	1.89444	0.921775	0.44803	NEUTRAL	TSC22D3	16.8342	113.732	2.75616	0.0106919	UP
hsa-miR-3176	14.013	26.5468	1.89444	0.921775	0.44803	NEUTRAL	TSC22D3	16.8342	113.732	2.75616	0.0106919	UP
hsa-miR-3176	14.013	26.5468	1.89444	0.921775	0.44803	NEUTRAL	TSC22D3	16.8342	113.732	2.75616	0.0106919	UP
hsa-miR-3615	81.7424	93.342	1.1419	0.191442	0.856957	NEUTRAL	TSC22D3	16.8342	113.732	2.75616	0.0106919	UP
hsa-miR-3615	81.7424	93.342	1.1419	0.191442	0.856957	NEUTRAL	TSC22D3	16.8342	113.732	2.75616	0.0106919	UP
hsa-miR-191-3p	17.5162	17.127	0.977778	-0.0324215	1	NEUTRAL	TSC22D3	16.8342	113.732	2.75616	0.0106919	UP
hsa-miR-191-3p	17.5162	17.127	0.977778	-0.0324215	1	NEUTRAL	TSC22D3	16.8342	113.732	2.75616	0.0106919	UP
hsa-miR-3195	3395.81	1815.46	0.534617	-0.903422	0.277116	NEUTRAL	TSC22D3	16.8342	113.732	2.75616	0.0106919	UP
hsa-miR-3152-5p	18.684	9.41984	0.504167	-0.988027	0.442641	NEUTRAL	TSC22D3	16.8342	113.732	2.75616	0.0106919	UP
hsa-miR-3152-5p	18.684	9.41984	0.504167	-0.988027	0.442641	NEUTRAL	TSC22D3	16.8342	113.732	2.75616	0.0106919	UP
hsa-miR-3152-5p	18.684	9.41984	0.504167	-0.988027	0.442641	NEUTRAL	TSC22D3	16.8342	113.732	2.75616	0.0106919	UP
hsa-miR-3152-5p	18.684	9.41984	0.504167	-0.988027	0.442641	NEUTRAL	TSC22D3	16.8342	113.732	2.75616	0.0106919	UP
hsa-miR-3152-5p	18.684	9.41984	0.504167	-0.988027	0.442641	NEUTRAL	TSC22D3	16.8342	113.732	2.75616	0.0106919	UP
hsa-miR-3152-5p	18.684	9.41984	0.504167	-0.988027	0.442641	NEUTRAL	TSC22D3	16.8342	113.732	2.75616	0.0106919	UP
hsa-miR-4532	44613.8	18135.8	0.406505	-1.29865	0.174811	DOWN	CXCL3	1.73802	11.3251	2.70402	0.325124	UP
hsa-miR-665	35.0325	53.95	1.54	0.62293	0.564592	NEUTRAL	KCNE4	5.48054	35.2987	2.68723	0.0106919	UP
hsa-miR-1285-3p	119.11	183.259	1.53856	0.621583	0.508504	NEUTRAL	KCNE4	5.48054	35.2987	2.68723	0.0106919	UP
hsa-miR-532-3p	1.16775	20.5524	17.6	4.1375	0.0150138	UP	SFRP1	1.01477	6.45309	2.66884	0.124892	UP
hsa-miR-532-3p	1.16775	20.5524	17.6	4.1375	0.0150138	UP	SFRP1	1.01477	6.45309	2.66884	0.124892	UP
hsa-miR-146b-3p	18.684	72.7897	3.89583	1.96193	0.0710823	UP	ST8SIA1	0.219082	1.37204	2.64678	0.779694	UP
hsa-miR-5787	12.8452	12.8452	1	0	1	NEUTRAL	ST8SIA1	0.219082	1.37204	2.64678	0.779694	UP
hsa-miR-1307-3p	231.214	429.887	1.85926	0.894728	0.309031	NEUTRAL	MAN1C1	0.103802	0.639326	2.62272	0.594542	UP
hsa-miR-1307-3p	231.214	429.887	1.85926	0.894728	0.309031	NEUTRAL	MAN1C1	0.103802	0.639326	2.62272	0.594542	UP
hsa-miR-339-5p	39.7034	39.392	0.992157	-0.0113599	1	NEUTRAL	MAN1C1	0.103802	0.639326	2.62272	0.594542	UP
hsa-miR-3158-3p	33.8647	19.696	0.581609	-0.781878	0.49424	NEUTRAL	MAN1C1	0.103802	0.639326	2.62272	0.594542	UP
hsa-miR-3176	14.013	26.5468	1.89444	0.921775	0.44803	NEUTRAL	SNED1	2.39331	14.6127	2.61014	0.419123	UP
hsa-miR-3176	14.013	26.5468	1.89444	0.921775	0.44803	NEUTRAL	SNED1	2.39331	14.6127	2.61014	0.419123	UP
hsa-miR-665	35.0325	53.95	1.54	0.62293	0.564592	NEUTRAL	SNED1	2.39331	14.6127	2.61014	0.419123	UP
hsa-miR-665	35.0325	53.95	1.54	0.62293	0.564592	NEUTRAL	SNED1	2.39331	14.6127	2.61014	0.419123	UP
hsa-miR-665	35.0325	53.95	1.54	0.62293	0.564592	NEUTRAL	SNED1	2.39331	14.6127	2.61014	0.419123	UP
hsa-miR-665	35.0325	53.95	1.54	0.62293	0.564592	NEUTRAL	SNED1	2.39331	14.6127	2.61014	0.419123	UP
hsa-miR-665	35.0325	53.95	1.54	0.62293	0.564592	NEUTRAL	SNED1	2.39331	14.6127	2.61014	0.419123	UP
hsa-miR-128-1-5p	19.8517	29.9722	1.5098	0.594361	0.62119	NEUTRAL	SNED1	2.39331	14.6127	2.61014	0.419123	UP
hsa-miR-128-1-5p	19.8517	29.9722	1.5098	0.594361	0.62119	NEUTRAL	SNED1	2.39331	14.6127	2.61014	0.419123	UP
hsa-miR-128-1-5p	19.8517	29.9722	1.5098	0.594361	0.62119	NEUTRAL	SNED1	2.39331	14.6127	2.61014	0.419123	UP
hsa-miR-128-1-5p	19.8517	29.9722	1.5098	0.594361	0.62119	NEUTRAL	SNED1	2.39331	14.6127	2.61014	0.419123	UP
hsa-miR-106b-3p	108.601	115.607	1.06452	0.0901978	0.935873	NEUTRAL	SNED1	2.39331	14.6127	2.61014	0.419123	UP
hsa-miR-3909	429.731	447.014	1.04022	0.0568851	0.95088	NEUTRAL	SNED1	2.39331	14.6127	2.61014	0.419123	UP
hsa-miR-3909	429.731	447.014	1.04022	0.0568851	0.95088	NEUTRAL	SNED1	2.39331	14.6127	2.61014	0.419123	UP
hsa-miR-3909	429.731	447.014	1.04022	0.0568851	0.95088	NEUTRAL	SNED1	2.39331	14.6127	2.61014	0.419123	UP
hsa-miR-5787	12.8452	12.8452	1	0	1	NEUTRAL	SNED1	2.39331	14.6127	2.61014	0.419123	UP
hsa-miR-493-3p	962.225	951.404	0.988754	-0.0163164	0.984889	NEUTRAL	SNED1	2.39331	14.6127	2.61014	0.419123	UP
hsa-miR-493-3p	962.225	951.404	0.988754	-0.0163164	0.984889	NEUTRAL	SNED1	2.39331	14.6127	2.61014	0.419123	UP
hsa-miR-493-3p	962.225	951.404	0.988754	-0.0163164	0.984889	NEUTRAL	SNED1	2.39331	14.6127	2.61014	0.419123	UP
hsa-miR-138-5p	10735.1	9257.99	0.862403	-0.213567	0.804777	NEUTRAL	SNED1	2.39331	14.6127	2.61014	0.419123	UP
hsa-miR-138-5p	10735.1	9257.99	0.862403	-0.213567	0.804777	NEUTRAL	SNED1	2.39331	14.6127	2.61014	0.419123	UP
hsa-miR-138-5p	10735.1	9257.99	0.862403	-0.213567	0.804777	NEUTRAL	SNED1	2.39331	14.6127	2.61014	0.419123	UP
hsa-miR-6852-5p	15.1807	12.8452	0.846154	-0.241008	0.903482	NEUTRAL	SNED1	2.39331	14.6127	2.61014	0.419123	UP
hsa-miR-6852-5p	15.1807	12.8452	0.846154	-0.241008	0.903482	NEUTRAL	SNED1	2.39331	14.6127	2.61014	0.419123	UP
hsa-miR-6852-5p	15.1807	12.8452	0.846154	-0.241008	0.903482	NEUTRAL	SNED1	2.39331	14.6127	2.61014	0.419123	UP
hsa-miR-6852-5p	15.1807	12.8452	0.846154	-0.241008	0.903482	NEUTRAL	SNED1	2.39331	14.6127	2.61014	0.419123	UP
hsa-miR-6852-5p	15.1807	12.8452	0.846154	-0.241008	0.903482	NEUTRAL	SNED1	2.39331	14.6127	2.61014	0.419123	UP
hsa-miR-182-5p	91.0844	76.215	0.836752	-0.257128	0.802838	NEUTRAL	SNED1	2.39331	14.6127	2.61014	0.419123	UP
hsa-miR-182-5p	91.0844	76.215	0.836752	-0.257128	0.802838	NEUTRAL	SNED1	2.39331	14.6127	2.61014	0.419123	UP
hsa-miR-182-5p	91.0844	76.215	0.836752	-0.257128	0.802838	NEUTRAL	SNED1	2.39331	14.6127	2.61014	0.419123	UP
hsa-miR-210-5p	343.318	101.049	0.294331	-1.76449	0.0554073	DOWN	SNED1	2.39331	14.6127	2.61014	0.419123	UP
hsa-miR-210-5p	343.318	101.049	0.294331	-1.76449	0.0554073	DOWN	SNED1	2.39331	14.6127	2.61014	0.419123	UP
hsa-miR-210-5p	343.318	101.049	0.294331	-1.76449	0.0554073	DOWN	SNED1	2.39331	14.6127	2.61014	0.419123	UP
hsa-miR-145-5p	4139.67	9074.73	2.19214	1.13234	0.187488	UP	COL4A3	0.148724	0.907793	2.60973	0.99965	UP
hsa-miR-6852-5p	15.1807	12.8452	0.846154	-0.241008	0.903482	NEUTRAL	COL4A3	0.148724	0.907793	2.60973	0.99965	UP
hsa-miR-6824-3p	2.3355	12.8452	5.5	2.45943	0.118936	UP	KCNE3	0.226295	1.37813	2.60643	0.99965	UP
hsa-miR-1285-3p	119.11	183.259	1.53856	0.621583	0.508504	NEUTRAL	KCNE3	0.226295	1.37813	2.60643	0.99965	UP
hsa-miR-665	35.0325	53.95	1.54	0.62293	0.564592	NEUTRAL	SLC4A11	0.0747748	0.454003	2.60208	0.99965	UP
hsa-miR-671-5p	58.3874	71.077	1.21733	0.283724	0.792222	NEUTRAL	SLC4A11	0.0747748	0.454003	2.60208	0.99965	UP
hsa-miR-671-5p	58.3874	71.077	1.21733	0.283724	0.792222	NEUTRAL	SLC4A11	0.0747748	0.454003	2.60208	0.99965	UP
hsa-miR-671-5p	58.3874	71.077	1.21733	0.283724	0.792222	NEUTRAL	SLC4A11	0.0747748	0.454003	2.60208	0.99965	UP
hsa-miR-671-5p	58.3874	71.077	1.21733	0.283724	0.792222	NEUTRAL	SLC4A11	0.0747748	0.454003	2.60208	0.99965	UP
hsa-miR-671-5p	58.3874	71.077	1.21733	0.283724	0.792222	NEUTRAL	SLC4A11	0.0747748	0.454003	2.60208	0.99965	UP
hsa-miR-4532	44613.8	18135.8	0.406505	-1.29865	0.174811	DOWN	SLC4A11	0.0747748	0.454003	2.60208	0.99965	UP
hsa-miR-19b-3p	481.112	1446.37	3.00631	1.58799	0.0610152	UP	CLMN	0.299667	1.77197	2.56392	0.639535	UP
hsa-miR-370-3p	175.162	376.793	2.15111	1.10508	0.216401	UP	CLMN	0.299667	1.77197	2.56392	0.639535	UP
hsa-miR-3176	14.013	26.5468	1.89444	0.921775	0.44803	NEUTRAL	CLMN	0.299667	1.77197	2.56392	0.639535	UP
hsa-miR-1228-3p	5.83874	10.2762	1.76	0.815575	0.615942	NEUTRAL	CLMN	0.299667	1.77197	2.56392	0.639535	UP
hsa-miR-5787	12.8452	12.8452	1	0	1	NEUTRAL	CLMN	0.299667	1.77197	2.56392	0.639535	UP
hsa-miR-339-5p	39.7034	39.392	0.992157	-0.0113599	1	NEUTRAL	CLMN	0.299667	1.77197	2.56392	0.639535	UP
hsa-miR-328-3p	142.465	68.5079	0.480874	-1.05627	0.275341	DOWN	CLMN	0.299667	1.77197	2.56392	0.639535	UP
hsa-miR-6842-3p	3.50325	8.56349	2.44444	1.28951	0.444061	UP	COL5A3	0.820731	4.84905	2.56272	0.0825021	UP
hsa-miR-370-3p	175.162	376.793	2.15111	1.10508	0.216401	UP	COL5A3	0.820731	4.84905	2.56272	0.0825021	UP
hsa-miR-7706	54.8842	113.038	2.05957	1.04235	0.295195	UP	COL5A3	0.820731	4.84905	2.56272	0.0825021	UP
hsa-miR-874-5p	15.1807	30.8286	2.03077	1.02203	0.386358	UP	COL5A3	0.820731	4.84905	2.56272	0.0825021	UP
hsa-miR-3176	14.013	26.5468	1.89444	0.921775	0.44803	NEUTRAL	COL5A3	0.820731	4.84905	2.56272	0.0825021	UP
hsa-miR-125a-5p	25628.6	48257.8	1.88297	0.91301	0.344622	NEUTRAL	COL5A3	0.820731	4.84905	2.56272	0.0825021	UP
hsa-miR-665	35.0325	53.95	1.54	0.62293	0.564592	NEUTRAL	COL5A3	0.820731	4.84905	2.56272	0.0825021	UP
hsa-miR-5100	25.6905	35.9667	1.4	0.485427	0.679016	NEUTRAL	COL5A3	0.820731	4.84905	2.56272	0.0825021	UP
hsa-miR-133a-3p	31.5292	28.2595	0.896296	-0.157952	0.916481	NEUTRAL	COL5A3	0.820731	4.84905	2.56272	0.0825021	UP
hsa-miR-455-3p	782.391	634.554	0.811045	-0.302147	0.718622	NEUTRAL	COL5A3	0.820731	4.84905	2.56272	0.0825021	UP
hsa-miR-5699-3p	12.8452	10.2762	0.8	-0.321928	0.865138	NEUTRAL	COL5A3	0.820731	4.84905	2.56272	0.0825021	UP
hsa-miR-654-5p	45.5422	35.9667	0.789744	-0.340544	0.764433	NEUTRAL	COL5A3	0.820731	4.84905	2.56272	0.0825021	UP
hsa-miR-4508	179.833	108.756	0.604762	-0.725561	0.439635	NEUTRAL	COL5A3	0.820731	4.84905	2.56272	0.0825021	UP
hsa-miR-328-3p	142.465	68.5079	0.480874	-1.05627	0.275341	DOWN	COL5A3	0.820731	4.84905	2.56272	0.0825021	UP
hsa-miR-4532	44613.8	18135.8	0.406505	-1.29865	0.174811	DOWN	COL5A3	0.820731	4.84905	2.56272	0.0825021	UP
hsa-miR-3065-3p	16.3485	4.28174	0.261905	-1.93289	0.153719	DOWN	COL5A3	0.820731	4.84905	2.56272	0.0825021	UP
hsa-miR-93-3p	37.3679	16.2706	0.435417	-1.19953	0.287475	DOWN	CCND2	0.247577	1.46249	2.56247	0.439948	UP
hsa-miR-3677-3p	7.00649	22.2651	3.17778	1.66802	0.197722	UP	PTGDR2	0.128088	0.751176	2.55202	0.99965	UP
hsa-miR-134-3p	8.17424	11.1325	1.3619	0.445626	0.8105	NEUTRAL	PTGDR2	0.128088	0.751176	2.55202	0.99965	UP
hsa-miR-4516	15.1807	63.3698	4.17436	2.06155	0.0638169	UP	B3GNT5	0.233485	1.36484	2.54733	0.767765	UP
hsa-miR-378a-3p	124.949	137.016	1.09657	0.133002	0.896913	NEUTRAL	B3GNT5	0.233485	1.36484	2.54733	0.767765	UP
hsa-miR-2277-5p	36.2002	58.2317	1.6086	0.685808	0.520897	NEUTRAL	SFRP2	0.362253	2.11404	2.54493	0.749723	UP
hsa-miR-1303	1.16775	8.56349	7.33333	2.87447	0.128943	UP	MARC1	0.725105	4.22624	2.54311	0.650518	UP
hsa-miR-4516	15.1807	63.3698	4.17436	2.06155	0.0638169	UP	MARC1	0.725105	4.22624	2.54311	0.650518	UP
hsa-miR-615-3p	228.879	602.013	2.63027	1.39521	0.110374	UP	MARC1	0.725105	4.22624	2.54311	0.650518	UP
hsa-miR-4466	12.8452	21.4087	1.66667	0.736966	0.567146	NEUTRAL	LRRC6	0.163118	0.949628	2.54145	0.753867	UP
hsa-miR-4466	12.8452	21.4087	1.66667	0.736966	0.567146	NEUTRAL	LRRC6	0.163118	0.949628	2.54145	0.753867	UP
hsa-miR-874-3p	168.156	259.474	1.54306	0.62579	0.491682	NEUTRAL	LMCD1	28.9673	168.095	2.53678	0.0191329	UP
hsa-miR-874-3p	168.156	259.474	1.54306	0.62579	0.491682	NEUTRAL	LMCD1	28.9673	168.095	2.53678	0.0191329	UP
hsa-miR-874-3p	168.156	259.474	1.54306	0.62579	0.491682	NEUTRAL	LMCD1	28.9673	168.095	2.53678	0.0191329	UP
hsa-miR-874-3p	168.156	259.474	1.54306	0.62579	0.491682	NEUTRAL	LMCD1	28.9673	168.095	2.53678	0.0191329	UP
hsa-miR-128-1-5p	19.8517	29.9722	1.5098	0.594361	0.62119	NEUTRAL	LMCD1	28.9673	168.095	2.53678	0.0191329	UP
hsa-miR-128-1-5p	19.8517	29.9722	1.5098	0.594361	0.62119	NEUTRAL	LMCD1	28.9673	168.095	2.53678	0.0191329	UP
hsa-miR-128-1-5p	19.8517	29.9722	1.5098	0.594361	0.62119	NEUTRAL	LMCD1	28.9673	168.095	2.53678	0.0191329	UP
hsa-miR-128-1-5p	19.8517	29.9722	1.5098	0.594361	0.62119	NEUTRAL	LMCD1	28.9673	168.095	2.53678	0.0191329	UP
hsa-miR-93-5p	795.237	776.708	0.976701	-0.0340112	0.968319	NEUTRAL	LMCD1	28.9673	168.095	2.53678	0.0191329	UP
hsa-miR-93-5p	795.237	776.708	0.976701	-0.0340112	0.968319	NEUTRAL	LMCD1	28.9673	168.095	2.53678	0.0191329	UP
hsa-miR-93-5p	795.237	776.708	0.976701	-0.0340112	0.968319	NEUTRAL	LMCD1	28.9673	168.095	2.53678	0.0191329	UP
hsa-miR-93-5p	795.237	776.708	0.976701	-0.0340112	0.968319	NEUTRAL	LMCD1	28.9673	168.095	2.53678	0.0191329	UP
hsa-miR-3176	14.013	26.5468	1.89444	0.921775	0.44803	NEUTRAL	FMOD	0.725639	4.18932	2.52939	0.176255	UP
hsa-miR-191-3p	17.5162	17.127	0.977778	-0.0324215	1	NEUTRAL	FMOD	0.725639	4.18932	2.52939	0.176255	UP
hsa-miR-191-3p	17.5162	17.127	0.977778	-0.0324215	1	NEUTRAL	FMOD	0.725639	4.18932	2.52939	0.176255	UP
hsa-miR-191-3p	17.5162	17.127	0.977778	-0.0324215	1	NEUTRAL	FMOD	0.725639	4.18932	2.52939	0.176255	UP
hsa-miR-3074-5p	31.5292	27.4032	0.869136	-0.202346	0.883564	NEUTRAL	SVEP1	3.92146	22.6272	2.52859	0.0106919	UP
hsa-miR-3074-5p	31.5292	27.4032	0.869136	-0.202346	0.883564	NEUTRAL	SVEP1	3.92146	22.6272	2.52859	0.0106919	UP
hsa-miR-3074-5p	31.5292	27.4032	0.869136	-0.202346	0.883564	NEUTRAL	SVEP1	3.92146	22.6272	2.52859	0.0106919	UP
hsa-miR-744-5p	850.121	678.228	0.797802	-0.325897	0.696683	NEUTRAL	SVEP1	3.92146	22.6272	2.52859	0.0106919	UP
hsa-miR-744-5p	850.121	678.228	0.797802	-0.325897	0.696683	NEUTRAL	SVEP1	3.92146	22.6272	2.52859	0.0106919	UP
hsa-miR-744-5p	850.121	678.228	0.797802	-0.325897	0.696683	NEUTRAL	SVEP1	3.92146	22.6272	2.52859	0.0106919	UP
hsa-miR-4532	44613.8	18135.8	0.406505	-1.29865	0.174811	DOWN	SVEP1	3.92146	22.6272	2.52859	0.0106919	UP
hsa-miR-4532	44613.8	18135.8	0.406505	-1.29865	0.174811	DOWN	SVEP1	3.92146	22.6272	2.52859	0.0106919	UP
hsa-miR-4532	44613.8	18135.8	0.406505	-1.29865	0.174811	DOWN	SVEP1	3.92146	22.6272	2.52859	0.0106919	UP
hsa-miR-4516	15.1807	63.3698	4.17436	2.06155	0.0638169	UP	FBLN1	46.1236	265.648	2.52594	0.0363525	UP
hsa-miR-4516	15.1807	63.3698	4.17436	2.06155	0.0638169	UP	FBLN1	46.1236	265.648	2.52594	0.0363525	UP
hsa-miR-4516	15.1807	63.3698	4.17436	2.06155	0.0638169	UP	FBLN1	46.1236	265.648	2.52594	0.0363525	UP
hsa-miR-4516	15.1807	63.3698	4.17436	2.06155	0.0638169	UP	FBLN1	46.1236	265.648	2.52594	0.0363525	UP
hsa-miR-3677-3p	7.00649	22.2651	3.17778	1.66802	0.197722	UP	FBLN1	46.1236	265.648	2.52594	0.0363525	UP
hsa-miR-671-5p	58.3874	71.077	1.21733	0.283724	0.792222	NEUTRAL	FBLN1	46.1236	265.648	2.52594	0.0363525	UP
hsa-miR-671-5p	58.3874	71.077	1.21733	0.283724	0.792222	NEUTRAL	FBLN1	46.1236	265.648	2.52594	0.0363525	UP
hsa-miR-671-5p	58.3874	71.077	1.21733	0.283724	0.792222	NEUTRAL	FBLN1	46.1236	265.648	2.52594	0.0363525	UP
hsa-miR-671-5p	58.3874	71.077	1.21733	0.283724	0.792222	NEUTRAL	FBLN1	46.1236	265.648	2.52594	0.0363525	UP
hsa-miR-671-5p	58.3874	71.077	1.21733	0.283724	0.792222	NEUTRAL	FBLN1	46.1236	265.648	2.52594	0.0363525	UP
hsa-miR-671-5p	58.3874	71.077	1.21733	0.283724	0.792222	NEUTRAL	FBLN1	46.1236	265.648	2.52594	0.0363525	UP
hsa-miR-766-3p	12.8452	10.2762	0.8	-0.321928	0.865138	NEUTRAL	FBLN1	46.1236	265.648	2.52594	0.0363525	UP
hsa-miR-4508	179.833	108.756	0.604762	-0.725561	0.439635	NEUTRAL	FBLN1	46.1236	265.648	2.52594	0.0363525	UP
hsa-miR-4508	179.833	108.756	0.604762	-0.725561	0.439635	NEUTRAL	FBLN1	46.1236	265.648	2.52594	0.0363525	UP
hsa-miR-4508	179.833	108.756	0.604762	-0.725561	0.439635	NEUTRAL	FBLN1	46.1236	265.648	2.52594	0.0363525	UP
hsa-miR-4508	179.833	108.756	0.604762	-0.725561	0.439635	NEUTRAL	FBLN1	46.1236	265.648	2.52594	0.0363525	UP
hsa-miR-4508	179.833	108.756	0.604762	-0.725561	0.439635	NEUTRAL	FBLN1	46.1236	265.648	2.52594	0.0363525	UP
hsa-miR-4508	179.833	108.756	0.604762	-0.725561	0.439635	NEUTRAL	FBLN1	46.1236	265.648	2.52594	0.0363525	UP
hsa-miR-1307-3p	231.214	429.887	1.85926	0.894728	0.309031	NEUTRAL	SOCS1	0.757969	4.2975	2.50329	0.663616	UP
hsa-miR-665	35.0325	53.95	1.54	0.62293	0.564592	NEUTRAL	SOCS1	0.757969	4.2975	2.50329	0.663616	UP
hsa-miR-4516	15.1807	63.3698	4.17436	2.06155	0.0638169	UP	ATG9B	0.108943	0.616624	2.50082	0.99965	UP
hsa-miR-4516	15.1807	63.3698	4.17436	2.06155	0.0638169	UP	ATG9B	0.108943	0.616624	2.50082	0.99965	UP
hsa-miR-665	35.0325	53.95	1.54	0.62293	0.564592	NEUTRAL	ATG9B	0.108943	0.616624	2.50082	0.99965	UP
hsa-miR-665	35.0325	53.95	1.54	0.62293	0.564592	NEUTRAL	ATG9B	0.108943	0.616624	2.50082	0.99965	UP
hsa-miR-665	35.0325	53.95	1.54	0.62293	0.564592	NEUTRAL	ATG9B	0.108943	0.616624	2.50082	0.99965	UP
hsa-miR-665	35.0325	53.95	1.54	0.62293	0.564592	NEUTRAL	ATG9B	0.108943	0.616624	2.50082	0.99965	UP
hsa-miR-665	35.0325	53.95	1.54	0.62293	0.564592	NEUTRAL	ATG9B	0.108943	0.616624	2.50082	0.99965	UP
hsa-miR-665	35.0325	53.95	1.54	0.62293	0.564592	NEUTRAL	ATG9B	0.108943	0.616624	2.50082	0.99965	UP
hsa-miR-4326	22.1872	29.9722	1.35088	0.433897	0.725686	NEUTRAL	ATG9B	0.108943	0.616624	2.50082	0.99965	UP
hsa-miR-4326	22.1872	29.9722	1.35088	0.433897	0.725686	NEUTRAL	ATG9B	0.108943	0.616624	2.50082	0.99965	UP
hsa-miR-4326	22.1872	29.9722	1.35088	0.433897	0.725686	NEUTRAL	ATG9B	0.108943	0.616624	2.50082	0.99965	UP
hsa-miR-5787	12.8452	12.8452	1	0	1	NEUTRAL	ATG9B	0.108943	0.616624	2.50082	0.99965	UP
hsa-miR-5787	12.8452	12.8452	1	0	1	NEUTRAL	ATG9B	0.108943	0.616624	2.50082	0.99965	UP
hsa-miR-1260b	15.1807	8.56349	0.564103	-0.825971	0.546679	NEUTRAL	ATG9B	0.108943	0.616624	2.50082	0.99965	UP
hsa-miR-210-5p	343.318	101.049	0.294331	-1.76449	0.0554073	DOWN	ATG9B	0.108943	0.616624	2.50082	0.99965	UP
hsa-miR-210-5p	343.318	101.049	0.294331	-1.76449	0.0554073	DOWN	ATG9B	0.108943	0.616624	2.50082	0.99965	UP
hsa-miR-210-5p	343.318	101.049	0.294331	-1.76449	0.0554073	DOWN	ATG9B	0.108943	0.616624	2.50082	0.99965	UP
hsa-miR-3960	12.8452	3.4254	0.266667	-1.90689	0.182003	DOWN	ATG9B	0.108943	0.616624	2.50082	0.99965	UP
hsa-miR-3960	12.8452	3.4254	0.266667	-1.90689	0.182003	DOWN	ATG9B	0.108943	0.616624	2.50082	0.99965	UP
hsa-miR-1469	1.16775	8.56349	7.33333	2.87447	0.128943	UP	CCDC68	1.30679	7.34101	2.48995	0.182641	UP
hsa-miR-330-5p	65.3939	89.9166	1.375	0.459432	0.651801	NEUTRAL	CCDC68	1.30679	7.34101	2.48995	0.182641	UP
hsa-miR-330-5p	65.3939	89.9166	1.375	0.459432	0.651801	NEUTRAL	CCDC68	1.30679	7.34101	2.48995	0.182641	UP
hsa-miR-330-5p	65.3939	89.9166	1.375	0.459432	0.651801	NEUTRAL	CCDC68	1.30679	7.34101	2.48995	0.182641	UP
hsa-miR-330-5p	65.3939	89.9166	1.375	0.459432	0.651801	NEUTRAL	CCDC68	1.30679	7.34101	2.48995	0.182641	UP
hsa-miR-671-5p	58.3874	71.077	1.21733	0.283724	0.792222	NEUTRAL	CCDC68	1.30679	7.34101	2.48995	0.182641	UP
hsa-miR-877-5p	19.8517	9.41984	0.47451	-1.07549	0.396051	DOWN	NPR3	21.3299	119.006	2.48009	0.0411538	UP
hsa-miR-877-5p	19.8517	9.41984	0.47451	-1.07549	0.396051	DOWN	NPR3	21.3299	119.006	2.48009	0.0411538	UP
hsa-miR-877-5p	19.8517	9.41984	0.47451	-1.07549	0.396051	DOWN	NPR3	21.3299	119.006	2.48009	0.0411538	UP
hsa-miR-877-5p	19.8517	9.41984	0.47451	-1.07549	0.396051	DOWN	NPR3	21.3299	119.006	2.48009	0.0411538	UP
hsa-miR-877-5p	19.8517	9.41984	0.47451	-1.07549	0.396051	DOWN	NPR3	21.3299	119.006	2.48009	0.0411538	UP
hsa-miR-877-5p	19.8517	9.41984	0.47451	-1.07549	0.396051	DOWN	NPR3	21.3299	119.006	2.48009	0.0411538	UP
hsa-miR-1469	1.16775	8.56349	7.33333	2.87447	0.128943	UP	RGMA	0.132383	0.718277	2.43982	0.574547	UP
hsa-miR-2467-5p	10.5097	34.254	3.25926	1.70454	0.152536	UP	RGMA	0.132383	0.718277	2.43982	0.574547	UP
hsa-miR-143-5p	290.769	466.71	1.60509	0.682652	0.432676	NEUTRAL	RGMA	0.132383	0.718277	2.43982	0.574547	UP
hsa-miR-1268b	72.4004	113.038	1.56129	0.642739	0.51546	NEUTRAL	RGMA	0.132383	0.718277	2.43982	0.574547	UP
hsa-miR-1268b	72.4004	113.038	1.56129	0.642739	0.51546	NEUTRAL	RGMA	0.132383	0.718277	2.43982	0.574547	UP
hsa-miR-339-3p	864.134	543.782	0.629279	-0.668228	0.426248	NEUTRAL	RGMA	0.132383	0.718277	2.43982	0.574547	UP
hsa-miR-128-1-5p	19.8517	29.9722	1.5098	0.594361	0.62119	NEUTRAL	TSPAN15	0.428805	2.31958	2.43547	0.796824	UP
hsa-miR-128-1-5p	19.8517	29.9722	1.5098	0.594361	0.62119	NEUTRAL	TSPAN15	0.428805	2.31958	2.43547	0.796824	UP
hsa-miR-128-1-5p	19.8517	29.9722	1.5098	0.594361	0.62119	NEUTRAL	TSPAN15	0.428805	2.31958	2.43547	0.796824	UP
hsa-miR-484	1332.4	1514.02	1.13631	0.184361	0.824672	NEUTRAL	TSPAN15	0.428805	2.31958	2.43547	0.796824	UP
hsa-miR-1303	1.16775	8.56349	7.33333	2.87447	0.128943	UP	SULT1A1	0.0878337	0.464288	2.40217	0.99965	UP
hsa-miR-874-3p	168.156	259.474	1.54306	0.62579	0.491682	NEUTRAL	SULT1A1	0.0878337	0.464288	2.40217	0.99965	UP
hsa-miR-296-5p	16.3485	24.8341	1.51905	0.603167	0.631192	NEUTRAL	SULT1A1	0.0878337	0.464288	2.40217	0.99965	UP
hsa-miR-1296-5p	254.569	327.125	1.28502	0.361786	0.684707	NEUTRAL	SULT1A1	0.0878337	0.464288	2.40217	0.99965	UP
hsa-miR-320b	10.5097	11.9889	1.14074	0.189971	0.962745	NEUTRAL	SULT1A1	0.0878337	0.464288	2.40217	0.99965	UP
hsa-miR-30c-1-3p	42.0389	42.8174	1.01852	0.0264722	1	NEUTRAL	SULT1A1	0.0878337	0.464288	2.40217	0.99965	UP
hsa-miR-744-5p	850.121	678.228	0.797802	-0.325897	0.696683	NEUTRAL	SULT1A1	0.0878337	0.464288	2.40217	0.99965	UP
hsa-miR-320a	2091.44	1600.52	0.765271	-0.385958	0.639358	NEUTRAL	SULT1A1	0.0878337	0.464288	2.40217	0.99965	UP
hsa-miR-214-5p	597.887	493.257	0.825	-0.277534	0.743819	NEUTRAL	KIF20A	0.122061	0.642542	2.39619	0.99965	UP
hsa-miR-214-5p	597.887	493.257	0.825	-0.277534	0.743819	NEUTRAL	KIF20A	0.122061	0.642542	2.39619	0.99965	UP
hsa-miR-214-5p	597.887	493.257	0.825	-0.277534	0.743819	NEUTRAL	KIF20A	0.122061	0.642542	2.39619	0.99965	UP
hsa-miR-214-5p	597.887	493.257	0.825	-0.277534	0.743819	NEUTRAL	KIF20A	0.122061	0.642542	2.39619	0.99965	UP
hsa-miR-5787	12.8452	12.8452	1	0	1	NEUTRAL	AIM1	0.533136	2.80009	2.3929	0.4594	UP
hsa-miR-4532	44613.8	18135.8	0.406505	-1.29865	0.174811	DOWN	CXCL2	0.843328	4.35931	2.36993	0.419123	UP
hsa-miR-1268b	72.4004	113.038	1.56129	0.642739	0.51546	NEUTRAL	CALCRL	0.0838545	0.428926	2.35477	0.99965	UP
hsa-miR-181b-5p	5543.3	4661.96	0.841008	-0.249808	0.765683	NEUTRAL	CALCRL	0.0838545	0.428926	2.35477	0.99965	UP
hsa-miR-181b-5p	5543.3	4661.96	0.841008	-0.249808	0.765683	NEUTRAL	CALCRL	0.0838545	0.428926	2.35477	0.99965	UP
hsa-miR-181b-5p	5543.3	4661.96	0.841008	-0.249808	0.765683	NEUTRAL	CALCRL	0.0838545	0.428926	2.35477	0.99965	UP
hsa-miR-181b-5p	5543.3	4661.96	0.841008	-0.249808	0.765683	NEUTRAL	CALCRL	0.0838545	0.428926	2.35477	0.99965	UP
hsa-miR-877-5p	19.8517	9.41984	0.47451	-1.07549	0.396051	DOWN	CALCRL	0.0838545	0.428926	2.35477	0.99965	UP
hsa-miR-877-5p	19.8517	9.41984	0.47451	-1.07549	0.396051	DOWN	CALCRL	0.0838545	0.428926	2.35477	0.99965	UP
hsa-miR-877-5p	19.8517	9.41984	0.47451	-1.07549	0.396051	DOWN	CALCRL	0.0838545	0.428926	2.35477	0.99965	UP
hsa-miR-1469	1.16775	8.56349	7.33333	2.87447	0.128943	UP	HR	0.643515	3.28174	2.35042	0.770327	UP
hsa-miR-370-3p	175.162	376.793	2.15111	1.10508	0.216401	UP	HR	0.643515	3.28174	2.35042	0.770327	UP
hsa-miR-370-3p	175.162	376.793	2.15111	1.10508	0.216401	UP	HR	0.643515	3.28174	2.35042	0.770327	UP
hsa-miR-370-3p	175.162	376.793	2.15111	1.10508	0.216401	UP	HR	0.643515	3.28174	2.35042	0.770327	UP
hsa-miR-3176	14.013	26.5468	1.89444	0.921775	0.44803	NEUTRAL	HR	0.643515	3.28174	2.35042	0.770327	UP
hsa-miR-3176	14.013	26.5468	1.89444	0.921775	0.44803	NEUTRAL	HR	0.643515	3.28174	2.35042	0.770327	UP
hsa-miR-3176	14.013	26.5468	1.89444	0.921775	0.44803	NEUTRAL	HR	0.643515	3.28174	2.35042	0.770327	UP
hsa-miR-4466	12.8452	21.4087	1.66667	0.736966	0.567146	NEUTRAL	HR	0.643515	3.28174	2.35042	0.770327	UP
hsa-miR-4466	12.8452	21.4087	1.66667	0.736966	0.567146	NEUTRAL	HR	0.643515	3.28174	2.35042	0.770327	UP
hsa-miR-4466	12.8452	21.4087	1.66667	0.736966	0.567146	NEUTRAL	HR	0.643515	3.28174	2.35042	0.770327	UP
hsa-miR-3687	14.013	17.9833	1.28333	0.359896	0.814743	NEUTRAL	HR	0.643515	3.28174	2.35042	0.770327	UP
hsa-miR-3687	14.013	17.9833	1.28333	0.359896	0.814743	NEUTRAL	HR	0.643515	3.28174	2.35042	0.770327	UP
hsa-miR-3687	14.013	17.9833	1.28333	0.359896	0.814743	NEUTRAL	HR	0.643515	3.28174	2.35042	0.770327	UP
hsa-miR-3687	14.013	17.9833	1.28333	0.359896	0.814743	NEUTRAL	HR	0.643515	3.28174	2.35042	0.770327	UP
hsa-miR-484	1332.4	1514.02	1.13631	0.184361	0.824672	NEUTRAL	HR	0.643515	3.28174	2.35042	0.770327	UP
hsa-miR-484	1332.4	1514.02	1.13631	0.184361	0.824672	NEUTRAL	HR	0.643515	3.28174	2.35042	0.770327	UP
hsa-miR-6852-5p	15.1807	12.8452	0.846154	-0.241008	0.903482	NEUTRAL	HR	0.643515	3.28174	2.35042	0.770327	UP
hsa-miR-6852-5p	15.1807	12.8452	0.846154	-0.241008	0.903482	NEUTRAL	HR	0.643515	3.28174	2.35042	0.770327	UP
hsa-miR-328-3p	142.465	68.5079	0.480874	-1.05627	0.275341	DOWN	HR	0.643515	3.28174	2.35042	0.770327	UP
hsa-miR-328-3p	142.465	68.5079	0.480874	-1.05627	0.275341	DOWN	HR	0.643515	3.28174	2.35042	0.770327	UP
hsa-miR-210-5p	343.318	101.049	0.294331	-1.76449	0.0554073	DOWN	HR	0.643515	3.28174	2.35042	0.770327	UP
hsa-miR-210-5p	343.318	101.049	0.294331	-1.76449	0.0554073	DOWN	HR	0.643515	3.28174	2.35042	0.770327	UP
hsa-miR-324-5p	22.1872	55.6627	2.50877	1.32698	0.222466	UP	HTRA3	0.20957	1.05997	2.33852	0.99965	UP
hsa-miR-324-5p	22.1872	55.6627	2.50877	1.32698	0.222466	UP	HTRA3	0.20957	1.05997	2.33852	0.99965	UP
hsa-miR-3909	429.731	447.014	1.04022	0.0568851	0.95088	NEUTRAL	HTRA3	0.20957	1.05997	2.33852	0.99965	UP
hsa-miR-149-5p	416.886	306.573	0.735387	-0.443423	0.61018	NEUTRAL	HTRA3	0.20957	1.05997	2.33852	0.99965	UP
hsa-miR-331-3p	391.196	240.634	0.615124	-0.70105	0.42477	NEUTRAL	HTRA3	0.20957	1.05997	2.33852	0.99965	UP
hsa-miR-2277-5p	36.2002	58.2317	1.6086	0.685808	0.520897	NEUTRAL	PPAP2B	30.8642	155.625	2.33407	0.0411538	UP
hsa-miR-2277-5p	36.2002	58.2317	1.6086	0.685808	0.520897	NEUTRAL	PPAP2B	30.8642	155.625	2.33407	0.0411538	UP
hsa-miR-1285-3p	119.11	183.259	1.53856	0.621583	0.508504	NEUTRAL	PPAP2B	30.8642	155.625	2.33407	0.0411538	UP
hsa-miR-5787	12.8452	12.8452	1	0	1	NEUTRAL	PPAP2B	30.8642	155.625	2.33407	0.0411538	UP
hsa-miR-5787	12.8452	12.8452	1	0	1	NEUTRAL	PPAP2B	30.8642	155.625	2.33407	0.0411538	UP
hsa-miR-1469	1.16775	8.56349	7.33333	2.87447	0.128943	UP	RASL10B	1.412	7.0987	2.32981	0.99965	UP
hsa-miR-1228-3p	5.83874	10.2762	1.76	0.815575	0.615942	NEUTRAL	RASL10B	1.412	7.0987	2.32981	0.99965	UP
hsa-miR-2277-5p	36.2002	58.2317	1.6086	0.685808	0.520897	NEUTRAL	RASL10B	1.412	7.0987	2.32981	0.99965	UP
hsa-miR-874-3p	168.156	259.474	1.54306	0.62579	0.491682	NEUTRAL	RASL10B	1.412	7.0987	2.32981	0.99965	UP
hsa-miR-6842-3p	3.50325	8.56349	2.44444	1.28951	0.444061	UP	VWA7	0.109147	0.547473	2.32651	0.99965	UP
hsa-miR-6842-3p	3.50325	8.56349	2.44444	1.28951	0.444061	UP	VWA7	0.109147	0.547473	2.32651	0.99965	UP
hsa-miR-6842-3p	3.50325	8.56349	2.44444	1.28951	0.444061	UP	VWA7	0.109147	0.547473	2.32651	0.99965	UP
hsa-miR-6842-3p	3.50325	8.56349	2.44444	1.28951	0.444061	UP	VWA7	0.109147	0.547473	2.32651	0.99965	UP
hsa-miR-6842-3p	3.50325	8.56349	2.44444	1.28951	0.444061	UP	VWA7	0.109147	0.547473	2.32651	0.99965	UP
hsa-miR-6842-3p	3.50325	8.56349	2.44444	1.28951	0.444061	UP	VWA7	0.109147	0.547473	2.32651	0.99965	UP
hsa-miR-665	35.0325	53.95	1.54	0.62293	0.564592	NEUTRAL	VWA7	0.109147	0.547473	2.32651	0.99965	UP
hsa-miR-665	35.0325	53.95	1.54	0.62293	0.564592	NEUTRAL	VWA7	0.109147	0.547473	2.32651	0.99965	UP
hsa-miR-665	35.0325	53.95	1.54	0.62293	0.564592	NEUTRAL	VWA7	0.109147	0.547473	2.32651	0.99965	UP
hsa-miR-665	35.0325	53.95	1.54	0.62293	0.564592	NEUTRAL	VWA7	0.109147	0.547473	2.32651	0.99965	UP
hsa-miR-665	35.0325	53.95	1.54	0.62293	0.564592	NEUTRAL	VWA7	0.109147	0.547473	2.32651	0.99965	UP
hsa-miR-665	35.0325	53.95	1.54	0.62293	0.564592	NEUTRAL	VWA7	0.109147	0.547473	2.32651	0.99965	UP
hsa-miR-4286	629.416	543.782	0.863946	-0.210988	0.803354	NEUTRAL	VWA7	0.109147	0.547473	2.32651	0.99965	UP
hsa-miR-4286	629.416	543.782	0.863946	-0.210988	0.803354	NEUTRAL	VWA7	0.109147	0.547473	2.32651	0.99965	UP
hsa-miR-4286	629.416	543.782	0.863946	-0.210988	0.803354	NEUTRAL	VWA7	0.109147	0.547473	2.32651	0.99965	UP
hsa-miR-4286	629.416	543.782	0.863946	-0.210988	0.803354	NEUTRAL	VWA7	0.109147	0.547473	2.32651	0.99965	UP
hsa-miR-4286	629.416	543.782	0.863946	-0.210988	0.803354	NEUTRAL	VWA7	0.109147	0.547473	2.32651	0.99965	UP
hsa-miR-4286	629.416	543.782	0.863946	-0.210988	0.803354	NEUTRAL	VWA7	0.109147	0.547473	2.32651	0.99965	UP
hsa-miR-4286	629.416	543.782	0.863946	-0.210988	0.803354	NEUTRAL	VWA7	0.109147	0.547473	2.32651	0.99965	UP
hsa-miR-4286	629.416	543.782	0.863946	-0.210988	0.803354	NEUTRAL	VWA7	0.109147	0.547473	2.32651	0.99965	UP
hsa-miR-4286	629.416	543.782	0.863946	-0.210988	0.803354	NEUTRAL	VWA7	0.109147	0.547473	2.32651	0.99965	UP
hsa-miR-4286	629.416	543.782	0.863946	-0.210988	0.803354	NEUTRAL	VWA7	0.109147	0.547473	2.32651	0.99965	UP
hsa-miR-4286	629.416	543.782	0.863946	-0.210988	0.803354	NEUTRAL	VWA7	0.109147	0.547473	2.32651	0.99965	UP
hsa-miR-4286	629.416	543.782	0.863946	-0.210988	0.803354	NEUTRAL	VWA7	0.109147	0.547473	2.32651	0.99965	UP
hsa-miR-766-3p	12.8452	10.2762	0.8	-0.321928	0.865138	NEUTRAL	VWA7	0.109147	0.547473	2.32651	0.99965	UP
hsa-miR-766-3p	12.8452	10.2762	0.8	-0.321928	0.865138	NEUTRAL	VWA7	0.109147	0.547473	2.32651	0.99965	UP
hsa-miR-766-3p	12.8452	10.2762	0.8	-0.321928	0.865138	NEUTRAL	VWA7	0.109147	0.547473	2.32651	0.99965	UP
hsa-miR-766-3p	12.8452	10.2762	0.8	-0.321928	0.865138	NEUTRAL	VWA7	0.109147	0.547473	2.32651	0.99965	UP
hsa-miR-766-3p	12.8452	10.2762	0.8	-0.321928	0.865138	NEUTRAL	VWA7	0.109147	0.547473	2.32651	0.99965	UP
hsa-miR-766-3p	12.8452	10.2762	0.8	-0.321928	0.865138	NEUTRAL	VWA7	0.109147	0.547473	2.32651	0.99965	UP
hsa-miR-744-5p	850.121	678.228	0.797802	-0.325897	0.696683	NEUTRAL	VWA7	0.109147	0.547473	2.32651	0.99965	UP
hsa-miR-744-5p	850.121	678.228	0.797802	-0.325897	0.696683	NEUTRAL	VWA7	0.109147	0.547473	2.32651	0.99965	UP
hsa-miR-744-5p	850.121	678.228	0.797802	-0.325897	0.696683	NEUTRAL	VWA7	0.109147	0.547473	2.32651	0.99965	UP
hsa-miR-744-5p	850.121	678.228	0.797802	-0.325897	0.696683	NEUTRAL	VWA7	0.109147	0.547473	2.32651	0.99965	UP
hsa-miR-744-5p	850.121	678.228	0.797802	-0.325897	0.696683	NEUTRAL	VWA7	0.109147	0.547473	2.32651	0.99965	UP
hsa-miR-744-5p	850.121	678.228	0.797802	-0.325897	0.696683	NEUTRAL	VWA7	0.109147	0.547473	2.32651	0.99965	UP
hsa-miR-328-3p	142.465	68.5079	0.480874	-1.05627	0.275341	DOWN	VWA7	0.109147	0.547473	2.32651	0.99965	UP
hsa-miR-328-3p	142.465	68.5079	0.480874	-1.05627	0.275341	DOWN	VWA7	0.109147	0.547473	2.32651	0.99965	UP
hsa-miR-328-3p	142.465	68.5079	0.480874	-1.05627	0.275341	DOWN	VWA7	0.109147	0.547473	2.32651	0.99965	UP
hsa-miR-328-3p	142.465	68.5079	0.480874	-1.05627	0.275341	DOWN	VWA7	0.109147	0.547473	2.32651	0.99965	UP
hsa-miR-328-3p	142.465	68.5079	0.480874	-1.05627	0.275341	DOWN	VWA7	0.109147	0.547473	2.32651	0.99965	UP
hsa-miR-328-3p	142.465	68.5079	0.480874	-1.05627	0.275341	DOWN	VWA7	0.109147	0.547473	2.32651	0.99965	UP
hsa-miR-328-3p	142.465	68.5079	0.480874	-1.05627	0.275341	DOWN	VWA7	0.109147	0.547473	2.32651	0.99965	UP
hsa-miR-328-3p	142.465	68.5079	0.480874	-1.05627	0.275341	DOWN	VWA7	0.109147	0.547473	2.32651	0.99965	UP
hsa-miR-328-3p	142.465	68.5079	0.480874	-1.05627	0.275341	DOWN	VWA7	0.109147	0.547473	2.32651	0.99965	UP
hsa-miR-328-3p	142.465	68.5079	0.480874	-1.05627	0.275341	DOWN	VWA7	0.109147	0.547473	2.32651	0.99965	UP
hsa-miR-328-3p	142.465	68.5079	0.480874	-1.05627	0.275341	DOWN	VWA7	0.109147	0.547473	2.32651	0.99965	UP
hsa-miR-328-3p	142.465	68.5079	0.480874	-1.05627	0.275341	DOWN	VWA7	0.109147	0.547473	2.32651	0.99965	UP
hsa-miR-433-3p	65.3939	39.392	0.602381	-0.731252	0.483031	NEUTRAL	ZNF90	0.200581	1.0049	2.3248	0.99965	UP
hsa-miR-433-3p	65.3939	39.392	0.602381	-0.731252	0.483031	NEUTRAL	ZNF90	0.200581	1.0049	2.3248	0.99965	UP
hsa-miR-433-3p	65.3939	39.392	0.602381	-0.731252	0.483031	NEUTRAL	ZNF90	0.200581	1.0049	2.3248	0.99965	UP
hsa-miR-370-3p	175.162	376.793	2.15111	1.10508	0.216401	UP	SERPINA3,SERPINA4,SERPINA5	0.837024	4.1648	2.3149	0.210548	UP
hsa-miR-370-3p	175.162	376.793	2.15111	1.10508	0.216401	UP	SERPINA3,SERPINA4,SERPINA5	0.837024	4.1648	2.3149	0.210548	UP
hsa-miR-370-3p	175.162	376.793	2.15111	1.10508	0.216401	UP	SERPINA3,SERPINA4,SERPINA5	0.837024	4.1648	2.3149	0.210548	UP
hsa-miR-296-5p	16.3485	24.8341	1.51905	0.603167	0.631192	NEUTRAL	SERPINA3,SERPINA4,SERPINA5	0.837024	4.1648	2.3149	0.210548	UP
hsa-miR-296-5p	16.3485	24.8341	1.51905	0.603167	0.631192	NEUTRAL	SERPINA3,SERPINA4,SERPINA5	0.837024	4.1648	2.3149	0.210548	UP
hsa-miR-296-5p	16.3485	24.8341	1.51905	0.603167	0.631192	NEUTRAL	SERPINA3,SERPINA4,SERPINA5	0.837024	4.1648	2.3149	0.210548	UP
hsa-miR-345-5p	463.596	673.09	1.45189	0.537931	0.526699	NEUTRAL	SERPINA3,SERPINA4,SERPINA5	0.837024	4.1648	2.3149	0.210548	UP
hsa-miR-6852-5p	15.1807	12.8452	0.846154	-0.241008	0.903482	NEUTRAL	SERPINA3,SERPINA4,SERPINA5	0.837024	4.1648	2.3149	0.210548	UP
hsa-miR-193a-5p	2097.28	947.122	0.451596	-1.14689	0.16852	DOWN	SERPINA3,SERPINA4,SERPINA5	0.837024	4.1648	2.3149	0.210548	UP
hsa-miR-1469	1.16775	8.56349	7.33333	2.87447	0.128943	UP	ZNF608	0.183681	0.913626	2.3144	0.755127	UP
hsa-miR-1469	1.16775	8.56349	7.33333	2.87447	0.128943	UP	ZNF608	0.183681	0.913626	2.3144	0.755127	UP
hsa-miR-1469	1.16775	8.56349	7.33333	2.87447	0.128943	UP	ZNF608	0.183681	0.913626	2.3144	0.755127	UP
hsa-miR-1469	1.16775	8.56349	7.33333	2.87447	0.128943	UP	ZNF608	0.183681	0.913626	2.3144	0.755127	UP
hsa-miR-1469	1.16775	8.56349	7.33333	2.87447	0.128943	UP	ZNF608	0.183681	0.913626	2.3144	0.755127	UP
hsa-miR-1469	1.16775	8.56349	7.33333	2.87447	0.128943	UP	ZNF608	0.183681	0.913626	2.3144	0.755127	UP
hsa-miR-3176	14.013	26.5468	1.89444	0.921775	0.44803	NEUTRAL	ZNF608	0.183681	0.913626	2.3144	0.755127	UP
hsa-miR-3176	14.013	26.5468	1.89444	0.921775	0.44803	NEUTRAL	ZNF608	0.183681	0.913626	2.3144	0.755127	UP
hsa-miR-3176	14.013	26.5468	1.89444	0.921775	0.44803	NEUTRAL	ZNF608	0.183681	0.913626	2.3144	0.755127	UP
hsa-miR-3176	14.013	26.5468	1.89444	0.921775	0.44803	NEUTRAL	ZNF608	0.183681	0.913626	2.3144	0.755127	UP
hsa-miR-1304-3p	161.149	160.994	0.999034	-0.00139458	1	NEUTRAL	ZNF608	0.183681	0.913626	2.3144	0.755127	UP
hsa-miR-1304-3p	161.149	160.994	0.999034	-0.00139458	1	NEUTRAL	ZNF608	0.183681	0.913626	2.3144	0.755127	UP
hsa-miR-1304-3p	161.149	160.994	0.999034	-0.00139458	1	NEUTRAL	ZNF608	0.183681	0.913626	2.3144	0.755127	UP
hsa-miR-1304-3p	161.149	160.994	0.999034	-0.00139458	1	NEUTRAL	ZNF608	0.183681	0.913626	2.3144	0.755127	UP
hsa-miR-6852-5p	15.1807	12.8452	0.846154	-0.241008	0.903482	NEUTRAL	ZNF608	0.183681	0.913626	2.3144	0.755127	UP
hsa-miR-6852-5p	15.1807	12.8452	0.846154	-0.241008	0.903482	NEUTRAL	ZNF608	0.183681	0.913626	2.3144	0.755127	UP
hsa-miR-6852-5p	15.1807	12.8452	0.846154	-0.241008	0.903482	NEUTRAL	ZNF608	0.183681	0.913626	2.3144	0.755127	UP
hsa-miR-6852-5p	15.1807	12.8452	0.846154	-0.241008	0.903482	NEUTRAL	ZNF608	0.183681	0.913626	2.3144	0.755127	UP
hsa-miR-6852-5p	15.1807	12.8452	0.846154	-0.241008	0.903482	NEUTRAL	ZNF608	0.183681	0.913626	2.3144	0.755127	UP
hsa-miR-6852-5p	15.1807	12.8452	0.846154	-0.241008	0.903482	NEUTRAL	ZNF608	0.183681	0.913626	2.3144	0.755127	UP
hsa-miR-3065-3p	16.3485	4.28174	0.261905	-1.93289	0.153719	DOWN	ZNF608	0.183681	0.913626	2.3144	0.755127	UP
hsa-miR-3065-3p	16.3485	4.28174	0.261905	-1.93289	0.153719	DOWN	ZNF608	0.183681	0.913626	2.3144	0.755127	UP
hsa-miR-3065-3p	16.3485	4.28174	0.261905	-1.93289	0.153719	DOWN	ZNF608	0.183681	0.913626	2.3144	0.755127	UP
hsa-miR-3065-3p	16.3485	4.28174	0.261905	-1.93289	0.153719	DOWN	ZNF608	0.183681	0.913626	2.3144	0.755127	UP
hsa-miR-330-5p	65.3939	89.9166	1.375	0.459432	0.651801	NEUTRAL	STK32A	0.186802	0.920699	2.30122	0.99965	UP
hsa-miR-550a-5p	14.013	12.8452	0.916667	-0.125531	0.987787	NEUTRAL	MFAP4	4.82618	23.756	2.29934	0.429147	UP
hsa-miR-550a-5p	14.013	12.8452	0.916667	-0.125531	0.987787	NEUTRAL	MFAP4	4.82618	23.756	2.29934	0.429147	UP
hsa-miR-550a-5p	14.013	12.8452	0.916667	-0.125531	0.987787	NEUTRAL	MFAP4	4.82618	23.756	2.29934	0.429147	UP
hsa-miR-550a-5p	14.013	12.8452	0.916667	-0.125531	0.987787	NEUTRAL	MFAP4	4.82618	23.756	2.29934	0.429147	UP
hsa-miR-2277-3p	8.17424	12.8452	1.57143	0.652077	0.672249	NEUTRAL	IGFBP2	99.3624	488.409	2.29732	0.0454406	UP
hsa-miR-665	35.0325	53.95	1.54	0.62293	0.564592	NEUTRAL	IGFBP2	99.3624	488.409	2.29732	0.0454406	UP
hsa-miR-1285-3p	119.11	183.259	1.53856	0.621583	0.508504	NEUTRAL	IGFBP2	99.3624	488.409	2.29732	0.0454406	UP
hsa-miR-296-5p	16.3485	24.8341	1.51905	0.603167	0.631192	NEUTRAL	IGFBP2	99.3624	488.409	2.29732	0.0454406	UP
hsa-miR-296-5p	16.3485	24.8341	1.51905	0.603167	0.631192	NEUTRAL	IGFBP2	99.3624	488.409	2.29732	0.0454406	UP
hsa-miR-296-5p	16.3485	24.8341	1.51905	0.603167	0.631192	NEUTRAL	IGFBP2	99.3624	488.409	2.29732	0.0454406	UP
hsa-miR-296-5p	16.3485	24.8341	1.51905	0.603167	0.631192	NEUTRAL	IGFBP2	99.3624	488.409	2.29732	0.0454406	UP
hsa-miR-486-5p	485.783	577.179	1.18814	0.248706	0.771855	NEUTRAL	IGFBP2	99.3624	488.409	2.29732	0.0454406	UP
hsa-miR-486-5p	485.783	577.179	1.18814	0.248706	0.771855	NEUTRAL	IGFBP2	99.3624	488.409	2.29732	0.0454406	UP
hsa-miR-486-5p	485.783	577.179	1.18814	0.248706	0.771855	NEUTRAL	IGFBP2	99.3624	488.409	2.29732	0.0454406	UP
hsa-miR-5787	12.8452	12.8452	1	0	1	NEUTRAL	IGFBP2	99.3624	488.409	2.29732	0.0454406	UP
hsa-miR-766-3p	12.8452	10.2762	0.8	-0.321928	0.865138	NEUTRAL	IGFBP2	99.3624	488.409	2.29732	0.0454406	UP
hsa-miR-766-3p	12.8452	10.2762	0.8	-0.321928	0.865138	NEUTRAL	IGFBP2	99.3624	488.409	2.29732	0.0454406	UP
hsa-miR-766-3p	12.8452	10.2762	0.8	-0.321928	0.865138	NEUTRAL	IGFBP2	99.3624	488.409	2.29732	0.0454406	UP
hsa-miR-766-3p	12.8452	10.2762	0.8	-0.321928	0.865138	NEUTRAL	IGFBP2	99.3624	488.409	2.29732	0.0454406	UP
hsa-miR-3960	12.8452	3.4254	0.266667	-1.90689	0.182003	DOWN	IGFBP2	99.3624	488.409	2.29732	0.0454406	UP
hsa-miR-3960	12.8452	3.4254	0.266667	-1.90689	0.182003	DOWN	IGFBP2	99.3624	488.409	2.29732	0.0454406	UP
hsa-miR-378a-3p	124.949	137.016	1.09657	0.133002	0.896913	NEUTRAL	DAAM2	2.48259	12.1586	2.29206	0.139315	UP
hsa-miR-378a-3p	124.949	137.016	1.09657	0.133002	0.896913	NEUTRAL	DAAM2	2.48259	12.1586	2.29206	0.139315	UP
hsa-miR-378a-3p	124.949	137.016	1.09657	0.133002	0.896913	NEUTRAL	DAAM2	2.48259	12.1586	2.29206	0.139315	UP
hsa-miR-197-3p	700.649	721.046	1.02911	0.0413988	0.963335	NEUTRAL	DAAM2	2.48259	12.1586	2.29206	0.139315	UP
hsa-miR-197-3p	700.649	721.046	1.02911	0.0413988	0.963335	NEUTRAL	DAAM2	2.48259	12.1586	2.29206	0.139315	UP
hsa-miR-197-3p	700.649	721.046	1.02911	0.0413988	0.963335	NEUTRAL	DAAM2	2.48259	12.1586	2.29206	0.139315	UP
hsa-miR-5787	12.8452	12.8452	1	0	1	NEUTRAL	DAAM2	2.48259	12.1586	2.29206	0.139315	UP
hsa-miR-339-5p	39.7034	39.392	0.992157	-0.0113599	1	NEUTRAL	DAAM2	2.48259	12.1586	2.29206	0.139315	UP
hsa-miR-339-5p	39.7034	39.392	0.992157	-0.0113599	1	NEUTRAL	DAAM2	2.48259	12.1586	2.29206	0.139315	UP
hsa-miR-339-5p	39.7034	39.392	0.992157	-0.0113599	1	NEUTRAL	DAAM2	2.48259	12.1586	2.29206	0.139315	UP
hsa-miR-766-3p	12.8452	10.2762	0.8	-0.321928	0.865138	NEUTRAL	DAAM2	2.48259	12.1586	2.29206	0.139315	UP
hsa-miR-766-3p	12.8452	10.2762	0.8	-0.321928	0.865138	NEUTRAL	DAAM2	2.48259	12.1586	2.29206	0.139315	UP
hsa-miR-766-3p	12.8452	10.2762	0.8	-0.321928	0.865138	NEUTRAL	DAAM2	2.48259	12.1586	2.29206	0.139315	UP
hsa-miR-940	5.83874	15.4143	2.64	1.40054	0.31347	UP	PSCA	0.123914	0.604331	2.286	0.99965	UP
hsa-miR-940	5.83874	15.4143	2.64	1.40054	0.31347	UP	PSCA	0.123914	0.604331	2.286	0.99965	UP
hsa-miR-4466	12.8452	21.4087	1.66667	0.736966	0.567146	NEUTRAL	PSCA	0.123914	0.604331	2.286	0.99965	UP
hsa-miR-4466	12.8452	21.4087	1.66667	0.736966	0.567146	NEUTRAL	PSCA	0.123914	0.604331	2.286	0.99965	UP
hsa-miR-1469	1.16775	8.56349	7.33333	2.87447	0.128943	UP	ACTA2	116.235	563.37	2.27704	0.0878315	UP
hsa-miR-6842-3p	3.50325	8.56349	2.44444	1.28951	0.444061	UP	ACTA2	116.235	563.37	2.27704	0.0878315	UP
hsa-miR-6842-3p	3.50325	8.56349	2.44444	1.28951	0.444061	UP	ACTA2	116.235	563.37	2.27704	0.0878315	UP
hsa-miR-6842-3p	3.50325	8.56349	2.44444	1.28951	0.444061	UP	ACTA2	116.235	563.37	2.27704	0.0878315	UP
hsa-miR-659-5p	16.3485	20.5524	1.25714	0.330149	0.823377	NEUTRAL	ACTA2	116.235	563.37	2.27704	0.0878315	UP
hsa-miR-659-5p	16.3485	20.5524	1.25714	0.330149	0.823377	NEUTRAL	ACTA2	116.235	563.37	2.27704	0.0878315	UP
hsa-miR-659-5p	16.3485	20.5524	1.25714	0.330149	0.823377	NEUTRAL	ACTA2	116.235	563.37	2.27704	0.0878315	UP
hsa-miR-330-5p	65.3939	89.9166	1.375	0.459432	0.651801	NEUTRAL	GARNL3	0.156428	0.757438	2.27563	0.363525	UP
hsa-miR-550a-5p	14.013	12.8452	0.916667	-0.125531	0.987787	NEUTRAL	GARNL3	0.156428	0.757438	2.27563	0.363525	UP
hsa-miR-766-3p	12.8452	10.2762	0.8	-0.321928	0.865138	NEUTRAL	GARNL3	0.156428	0.757438	2.27563	0.363525	UP
hsa-miR-328-3p	142.465	68.5079	0.480874	-1.05627	0.275341	DOWN	GARNL3	0.156428	0.757438	2.27563	0.363525	UP
hsa-miR-330-5p	65.3939	89.9166	1.375	0.459432	0.651801	NEUTRAL	ACVRL1	0.396256	1.91177	2.2704	0.599558	UP
hsa-miR-1306-5p	10.5097	8.56349	0.814815	-0.295456	0.902973	NEUTRAL	ACVRL1	0.396256	1.91177	2.2704	0.599558	UP
hsa-miR-1306-5p	10.5097	8.56349	0.814815	-0.295456	0.902973	NEUTRAL	ACVRL1	0.396256	1.91177	2.2704	0.599558	UP
hsa-miR-668-3p	51.3809	24.8341	0.483333	-1.04891	0.329782	DOWN	ACVRL1	0.396256	1.91177	2.2704	0.599558	UP
hsa-miR-3065-3p	16.3485	4.28174	0.261905	-1.93289	0.153719	DOWN	ACVRL1	0.396256	1.91177	2.2704	0.599558	UP
hsa-miR-3065-3p	16.3485	4.28174	0.261905	-1.93289	0.153719	DOWN	ACVRL1	0.396256	1.91177	2.2704	0.599558	UP
hsa-miR-3065-3p	16.3485	4.28174	0.261905	-1.93289	0.153719	DOWN	ACVRL1	0.396256	1.91177	2.2704	0.599558	UP
hsa-miR-6842-3p	3.50325	8.56349	2.44444	1.28951	0.444061	UP	TMEM154	0.132931	0.634349	2.25459	0.99965	UP
hsa-miR-2277-5p	36.2002	58.2317	1.6086	0.685808	0.520897	NEUTRAL	TMEM154	0.132931	0.634349	2.25459	0.99965	UP
hsa-miR-2277-5p	36.2002	58.2317	1.6086	0.685808	0.520897	NEUTRAL	TMEM154	0.132931	0.634349	2.25459	0.99965	UP
hsa-miR-1285-3p	119.11	183.259	1.53856	0.621583	0.508504	NEUTRAL	TMEM154	0.132931	0.634349	2.25459	0.99965	UP
hsa-miR-4516	15.1807	63.3698	4.17436	2.06155	0.0638169	UP	CDKN1C	0.702316	3.32588	2.24355	0.736234	UP
hsa-miR-1307-5p	579.203	1323.06	2.28427	1.19174	0.156107	UP	CDKN1C	0.702316	3.32588	2.24355	0.736234	UP
hsa-miR-1307-5p	579.203	1323.06	2.28427	1.19174	0.156107	UP	CDKN1C	0.702316	3.32588	2.24355	0.736234	UP
hsa-miR-1307-5p	579.203	1323.06	2.28427	1.19174	0.156107	UP	CDKN1C	0.702316	3.32588	2.24355	0.736234	UP
hsa-miR-887-3p	94.5876	114.751	1.21317	0.27878	0.781165	NEUTRAL	CDKN1C	0.702316	3.32588	2.24355	0.736234	UP
hsa-miR-887-3p	94.5876	114.751	1.21317	0.27878	0.781165	NEUTRAL	CDKN1C	0.702316	3.32588	2.24355	0.736234	UP
hsa-miR-887-3p	94.5876	114.751	1.21317	0.27878	0.781165	NEUTRAL	CDKN1C	0.702316	3.32588	2.24355	0.736234	UP
hsa-miR-887-3p	94.5876	114.751	1.21317	0.27878	0.781165	NEUTRAL	CDKN1C	0.702316	3.32588	2.24355	0.736234	UP
hsa-miR-887-3p	94.5876	114.751	1.21317	0.27878	0.781165	NEUTRAL	CDKN1C	0.702316	3.32588	2.24355	0.736234	UP
hsa-miR-4508	179.833	108.756	0.604762	-0.725561	0.439635	NEUTRAL	CDKN1C	0.702316	3.32588	2.24355	0.736234	UP
hsa-miR-127-5p	283.763	552.345	1.9465	0.960884	0.267509	NEUTRAL	ZFHX2	0.175324	0.826322	2.23668	0.99965	UP
hsa-miR-127-5p	283.763	552.345	1.9465	0.960884	0.267509	NEUTRAL	ZFHX2	0.175324	0.826322	2.23668	0.99965	UP
hsa-miR-4466	12.8452	21.4087	1.66667	0.736966	0.567146	NEUTRAL	ZFHX2	0.175324	0.826322	2.23668	0.99965	UP
hsa-miR-769-3p	7.00649	8.56349	1.22222	0.289507	0.938956	NEUTRAL	ZFHX2	0.175324	0.826322	2.23668	0.99965	UP
hsa-miR-769-3p	7.00649	8.56349	1.22222	0.289507	0.938956	NEUTRAL	ZFHX2	0.175324	0.826322	2.23668	0.99965	UP
hsa-miR-769-3p	7.00649	8.56349	1.22222	0.289507	0.938956	NEUTRAL	ZFHX2	0.175324	0.826322	2.23668	0.99965	UP
hsa-miR-769-3p	7.00649	8.56349	1.22222	0.289507	0.938956	NEUTRAL	ZFHX2	0.175324	0.826322	2.23668	0.99965	UP
hsa-miR-671-5p	58.3874	71.077	1.21733	0.283724	0.792222	NEUTRAL	ZFHX2	0.175324	0.826322	2.23668	0.99965	UP
hsa-miR-210-5p	343.318	101.049	0.294331	-1.76449	0.0554073	DOWN	ZFHX2	0.175324	0.826322	2.23668	0.99965	UP
hsa-miR-3176	14.013	26.5468	1.89444	0.921775	0.44803	NEUTRAL	JPH2	0.339599	1.58741	2.22478	0.538894	UP
hsa-miR-4466	12.8452	21.4087	1.66667	0.736966	0.567146	NEUTRAL	JPH2	0.339599	1.58741	2.22478	0.538894	UP
hsa-miR-431-5p	463.596	691.93	1.49253	0.577757	0.496199	NEUTRAL	JPH2	0.339599	1.58741	2.22478	0.538894	UP
hsa-miR-431-5p	463.596	691.93	1.49253	0.577757	0.496199	NEUTRAL	JPH2	0.339599	1.58741	2.22478	0.538894	UP
hsa-miR-769-5p	2483.8	3139.37	1.26394	0.337928	0.684112	NEUTRAL	JPH2	0.339599	1.58741	2.22478	0.538894	UP
hsa-miR-4488	3253.35	2433.74	0.748074	-0.418748	0.612634	NEUTRAL	JPH2	0.339599	1.58741	2.22478	0.538894	UP
hsa-miR-3656	741.52	10.2762	0.0138583	-6.17311	2.11383e-08	DOWN	JPH2	0.339599	1.58741	2.22478	0.538894	UP
hsa-miR-3176	14.013	26.5468	1.89444	0.921775	0.44803	NEUTRAL	IL21R	0.196042	0.909554	2.214	0.99965	UP
hsa-miR-3176	14.013	26.5468	1.89444	0.921775	0.44803	NEUTRAL	IL21R	0.196042	0.909554	2.214	0.99965	UP
hsa-miR-3176	14.013	26.5468	1.89444	0.921775	0.44803	NEUTRAL	IL21R	0.196042	0.909554	2.214	0.99965	UP
hsa-miR-3151-3p	10.5097	11.1325	1.05926	0.0830557	1	NEUTRAL	IL21R	0.196042	0.909554	2.214	0.99965	UP
hsa-miR-3151-3p	10.5097	11.1325	1.05926	0.0830557	1	NEUTRAL	IL21R	0.196042	0.909554	2.214	0.99965	UP
hsa-miR-3151-3p	10.5097	11.1325	1.05926	0.0830557	1	NEUTRAL	IL21R	0.196042	0.909554	2.214	0.99965	UP
hsa-miR-490-3p	35.0325	23.9778	0.684444	-0.546995	0.635402	NEUTRAL	IL21R	0.196042	0.909554	2.214	0.99965	UP
hsa-miR-490-3p	35.0325	23.9778	0.684444	-0.546995	0.635402	NEUTRAL	IL21R	0.196042	0.909554	2.214	0.99965	UP
hsa-miR-671-5p	58.3874	71.077	1.21733	0.283724	0.792222	NEUTRAL	TROAP	0.101507	0.470639	2.21304	0.598951	UP
hsa-miR-671-5p	58.3874	71.077	1.21733	0.283724	0.792222	NEUTRAL	TROAP	0.101507	0.470639	2.21304	0.598951	UP
hsa-miR-671-5p	58.3874	71.077	1.21733	0.283724	0.792222	NEUTRAL	TROAP	0.101507	0.470639	2.21304	0.598951	UP
hsa-miR-671-5p	58.3874	71.077	1.21733	0.283724	0.792222	NEUTRAL	TROAP	0.101507	0.470639	2.21304	0.598951	UP
hsa-miR-671-5p	58.3874	71.077	1.21733	0.283724	0.792222	NEUTRAL	TROAP	0.101507	0.470639	2.21304	0.598951	UP
hsa-miR-671-5p	58.3874	71.077	1.21733	0.283724	0.792222	NEUTRAL	TROAP	0.101507	0.470639	2.21304	0.598951	UP
hsa-miR-671-5p	58.3874	71.077	1.21733	0.283724	0.792222	NEUTRAL	TROAP	0.101507	0.470639	2.21304	0.598951	UP
hsa-miR-671-5p	58.3874	71.077	1.21733	0.283724	0.792222	NEUTRAL	TROAP	0.101507	0.470639	2.21304	0.598951	UP
hsa-miR-370-3p	175.162	376.793	2.15111	1.10508	0.216401	UP	ABCA8	0.478793	2.18075	2.18735	0.25403	UP
hsa-miR-532-3p	1.16775	20.5524	17.6	4.1375	0.0150138	UP	TP53I11	22.377	101.474	2.18102	0.0411538	UP
hsa-miR-532-3p	1.16775	20.5524	17.6	4.1375	0.0150138	UP	TP53I11	22.377	101.474	2.18102	0.0411538	UP
hsa-miR-532-3p	1.16775	20.5524	17.6	4.1375	0.0150138	UP	TP53I11	22.377	101.474	2.18102	0.0411538	UP
hsa-miR-532-3p	1.16775	20.5524	17.6	4.1375	0.0150138	UP	TP53I11	22.377	101.474	2.18102	0.0411538	UP
hsa-miR-146b-3p	18.684	72.7897	3.89583	1.96193	0.0710823	UP	TP53I11	22.377	101.474	2.18102	0.0411538	UP
hsa-miR-874-5p	15.1807	30.8286	2.03077	1.02203	0.386358	UP	TP53I11	22.377	101.474	2.18102	0.0411538	UP
hsa-miR-874-5p	15.1807	30.8286	2.03077	1.02203	0.386358	UP	TP53I11	22.377	101.474	2.18102	0.0411538	UP
hsa-miR-874-5p	15.1807	30.8286	2.03077	1.02203	0.386358	UP	TP53I11	22.377	101.474	2.18102	0.0411538	UP
hsa-miR-874-5p	15.1807	30.8286	2.03077	1.02203	0.386358	UP	TP53I11	22.377	101.474	2.18102	0.0411538	UP
hsa-miR-874-5p	15.1807	30.8286	2.03077	1.02203	0.386358	UP	TP53I11	22.377	101.474	2.18102	0.0411538	UP
hsa-miR-874-5p	15.1807	30.8286	2.03077	1.02203	0.386358	UP	TP53I11	22.377	101.474	2.18102	0.0411538	UP
hsa-miR-296-5p	16.3485	24.8341	1.51905	0.603167	0.631192	NEUTRAL	TP53I11	22.377	101.474	2.18102	0.0411538	UP
hsa-miR-296-5p	16.3485	24.8341	1.51905	0.603167	0.631192	NEUTRAL	TP53I11	22.377	101.474	2.18102	0.0411538	UP
hsa-miR-296-5p	16.3485	24.8341	1.51905	0.603167	0.631192	NEUTRAL	TP53I11	22.377	101.474	2.18102	0.0411538	UP
hsa-miR-296-5p	16.3485	24.8341	1.51905	0.603167	0.631192	NEUTRAL	TP53I11	22.377	101.474	2.18102	0.0411538	UP
hsa-miR-4326	22.1872	29.9722	1.35088	0.433897	0.725686	NEUTRAL	TP53I11	22.377	101.474	2.18102	0.0411538	UP
hsa-miR-4326	22.1872	29.9722	1.35088	0.433897	0.725686	NEUTRAL	TP53I11	22.377	101.474	2.18102	0.0411538	UP
hsa-miR-4326	22.1872	29.9722	1.35088	0.433897	0.725686	NEUTRAL	TP53I11	22.377	101.474	2.18102	0.0411538	UP
hsa-miR-4326	22.1872	29.9722	1.35088	0.433897	0.725686	NEUTRAL	TP53I11	22.377	101.474	2.18102	0.0411538	UP
hsa-miR-4326	22.1872	29.9722	1.35088	0.433897	0.725686	NEUTRAL	TP53I11	22.377	101.474	2.18102	0.0411538	UP
hsa-miR-4326	22.1872	29.9722	1.35088	0.433897	0.725686	NEUTRAL	TP53I11	22.377	101.474	2.18102	0.0411538	UP
hsa-miR-671-5p	58.3874	71.077	1.21733	0.283724	0.792222	NEUTRAL	TP53I11	22.377	101.474	2.18102	0.0411538	UP
hsa-miR-3151-3p	10.5097	11.1325	1.05926	0.0830557	1	NEUTRAL	TP53I11	22.377	101.474	2.18102	0.0411538	UP
hsa-miR-3151-3p	10.5097	11.1325	1.05926	0.0830557	1	NEUTRAL	TP53I11	22.377	101.474	2.18102	0.0411538	UP
hsa-miR-3151-3p	10.5097	11.1325	1.05926	0.0830557	1	NEUTRAL	TP53I11	22.377	101.474	2.18102	0.0411538	UP
hsa-miR-3151-3p	10.5097	11.1325	1.05926	0.0830557	1	NEUTRAL	TP53I11	22.377	101.474	2.18102	0.0411538	UP
hsa-miR-3151-3p	10.5097	11.1325	1.05926	0.0830557	1	NEUTRAL	TP53I11	22.377	101.474	2.18102	0.0411538	UP
hsa-miR-3151-3p	10.5097	11.1325	1.05926	0.0830557	1	NEUTRAL	TP53I11	22.377	101.474	2.18102	0.0411538	UP
hsa-miR-3909	429.731	447.014	1.04022	0.0568851	0.95088	NEUTRAL	DNAJC6	1.4517	6.52401	2.16802	0.227598	UP
hsa-miR-3909	429.731	447.014	1.04022	0.0568851	0.95088	NEUTRAL	DNAJC6	1.4517	6.52401	2.16802	0.227598	UP
hsa-miR-3909	429.731	447.014	1.04022	0.0568851	0.95088	NEUTRAL	DNAJC6	1.4517	6.52401	2.16802	0.227598	UP
hsa-miR-3909	429.731	447.014	1.04022	0.0568851	0.95088	NEUTRAL	DNAJC6	1.4517	6.52401	2.16802	0.227598	UP
hsa-miR-1469	1.16775	8.56349	7.33333	2.87447	0.128943	UP	FBN2	2.98028	13.2643	2.15402	0.0106919	UP
hsa-miR-1469	1.16775	8.56349	7.33333	2.87447	0.128943	UP	FBN2	2.98028	13.2643	2.15402	0.0106919	UP
hsa-miR-1469	1.16775	8.56349	7.33333	2.87447	0.128943	UP	FBN2	2.98028	13.2643	2.15402	0.0106919	UP
hsa-miR-1469	1.16775	8.56349	7.33333	2.87447	0.128943	UP	FBN2	2.98028	13.2643	2.15402	0.0106919	UP
hsa-miR-2277-5p	36.2002	58.2317	1.6086	0.685808	0.520897	NEUTRAL	FBN2	2.98028	13.2643	2.15402	0.0106919	UP
hsa-miR-2277-5p	36.2002	58.2317	1.6086	0.685808	0.520897	NEUTRAL	FBN2	2.98028	13.2643	2.15402	0.0106919	UP
hsa-miR-2277-5p	36.2002	58.2317	1.6086	0.685808	0.520897	NEUTRAL	FBN2	2.98028	13.2643	2.15402	0.0106919	UP
hsa-miR-92a-1-5p	10.5097	10.2762	0.977778	-0.0324215	1	NEUTRAL	FBN2	2.98028	13.2643	2.15402	0.0106919	UP
hsa-miR-92a-1-5p	10.5097	10.2762	0.977778	-0.0324215	1	NEUTRAL	FBN2	2.98028	13.2643	2.15402	0.0106919	UP
hsa-miR-92a-1-5p	10.5097	10.2762	0.977778	-0.0324215	1	NEUTRAL	FBN2	2.98028	13.2643	2.15402	0.0106919	UP
hsa-miR-92a-1-5p	10.5097	10.2762	0.977778	-0.0324215	1	NEUTRAL	FBN2	2.98028	13.2643	2.15402	0.0106919	UP
hsa-miR-92a-1-5p	10.5097	10.2762	0.977778	-0.0324215	1	NEUTRAL	FBN2	2.98028	13.2643	2.15402	0.0106919	UP
hsa-miR-92a-1-5p	10.5097	10.2762	0.977778	-0.0324215	1	NEUTRAL	FBN2	2.98028	13.2643	2.15402	0.0106919	UP
hsa-miR-3184-5p	12.8452	4.28174	0.333333	-1.58496	0.260039	DOWN	FBN2	2.98028	13.2643	2.15402	0.0106919	UP
hsa-miR-3184-5p	12.8452	4.28174	0.333333	-1.58496	0.260039	DOWN	FBN2	2.98028	13.2643	2.15402	0.0106919	UP
hsa-miR-3184-5p	12.8452	4.28174	0.333333	-1.58496	0.260039	DOWN	FBN2	2.98028	13.2643	2.15402	0.0106919	UP
hsa-miR-483-3p	2.3355	345.965	148.133	7.21075	6.38393e-08	UP	SCNN1A	0.322383	1.43061	2.14978	0.99965	UP
hsa-miR-665	35.0325	53.95	1.54	0.62293	0.564592	NEUTRAL	SCNN1A	0.322383	1.43061	2.14978	0.99965	UP
hsa-miR-665	35.0325	53.95	1.54	0.62293	0.564592	NEUTRAL	SCNN1A	0.322383	1.43061	2.14978	0.99965	UP
hsa-miR-4516	15.1807	63.3698	4.17436	2.06155	0.0638169	UP	CYGB	3.63651	16.1267	2.14882	0.342856	UP
hsa-miR-4516	15.1807	63.3698	4.17436	2.06155	0.0638169	UP	CYGB	3.63651	16.1267	2.14882	0.342856	UP
hsa-miR-1307-3p	231.214	429.887	1.85926	0.894728	0.309031	NEUTRAL	CYGB	3.63651	16.1267	2.14882	0.342856	UP
hsa-miR-1307-3p	231.214	429.887	1.85926	0.894728	0.309031	NEUTRAL	CYGB	3.63651	16.1267	2.14882	0.342856	UP
hsa-miR-296-5p	16.3485	24.8341	1.51905	0.603167	0.631192	NEUTRAL	CYGB	3.63651	16.1267	2.14882	0.342856	UP
hsa-miR-4508	179.833	108.756	0.604762	-0.725561	0.439635	NEUTRAL	CYGB	3.63651	16.1267	2.14882	0.342856	UP
hsa-miR-4508	179.833	108.756	0.604762	-0.725561	0.439635	NEUTRAL	CYGB	3.63651	16.1267	2.14882	0.342856	UP
hsa-miR-3960	12.8452	3.4254	0.266667	-1.90689	0.182003	DOWN	CYGB	3.63651	16.1267	2.14882	0.342856	UP
hsa-miR-3960	12.8452	3.4254	0.266667	-1.90689	0.182003	DOWN	CYGB	3.63651	16.1267	2.14882	0.342856	UP
hsa-miR-4466	12.8452	21.4087	1.66667	0.736966	0.567146	NEUTRAL	GPC4	14.3208	63.3044	2.14419	0.0545288	UP
hsa-miR-1268b	72.4004	113.038	1.56129	0.642739	0.51546	NEUTRAL	GPC4	14.3208	63.3044	2.14419	0.0545288	UP
hsa-miR-431-3p	68.8972	49.6682	0.720904	-0.472121	0.650903	NEUTRAL	BHLHA15	0.134112	0.591733	2.14151	0.99965	UP
hsa-miR-431-3p	68.8972	49.6682	0.720904	-0.472121	0.650903	NEUTRAL	BHLHA15	0.134112	0.591733	2.14151	0.99965	UP
hsa-miR-665	35.0325	53.95	1.54	0.62293	0.564592	NEUTRAL	TSPAN18	3.43707	14.8486	2.11108	0.99965	UP
hsa-miR-665	35.0325	53.95	1.54	0.62293	0.564592	NEUTRAL	TSPAN18	3.43707	14.8486	2.11108	0.99965	UP
hsa-miR-665	35.0325	53.95	1.54	0.62293	0.564592	NEUTRAL	TSPAN18	3.43707	14.8486	2.11108	0.99965	UP
hsa-miR-665	35.0325	53.95	1.54	0.62293	0.564592	NEUTRAL	TSPAN18	3.43707	14.8486	2.11108	0.99965	UP
hsa-miR-665	35.0325	53.95	1.54	0.62293	0.564592	NEUTRAL	TSPAN18	3.43707	14.8486	2.11108	0.99965	UP
hsa-miR-665	35.0325	53.95	1.54	0.62293	0.564592	NEUTRAL	TSPAN18	3.43707	14.8486	2.11108	0.99965	UP
hsa-miR-665	35.0325	53.95	1.54	0.62293	0.564592	NEUTRAL	TSPAN18	3.43707	14.8486	2.11108	0.99965	UP
hsa-miR-665	35.0325	53.95	1.54	0.62293	0.564592	NEUTRAL	TSPAN18	3.43707	14.8486	2.11108	0.99965	UP
hsa-miR-589-5p	260.408	341.683	1.31211	0.391886	0.658808	NEUTRAL	TSPAN18	3.43707	14.8486	2.11108	0.99965	UP
hsa-miR-589-5p	260.408	341.683	1.31211	0.391886	0.658808	NEUTRAL	TSPAN18	3.43707	14.8486	2.11108	0.99965	UP
hsa-miR-589-5p	260.408	341.683	1.31211	0.391886	0.658808	NEUTRAL	TSPAN18	3.43707	14.8486	2.11108	0.99965	UP
hsa-miR-589-5p	260.408	341.683	1.31211	0.391886	0.658808	NEUTRAL	TSPAN18	3.43707	14.8486	2.11108	0.99965	UP
hsa-miR-589-5p	260.408	341.683	1.31211	0.391886	0.658808	NEUTRAL	TSPAN18	3.43707	14.8486	2.11108	0.99965	UP
hsa-miR-197-3p	700.649	721.046	1.02911	0.0413988	0.963335	NEUTRAL	TSPAN18	3.43707	14.8486	2.11108	0.99965	UP
hsa-miR-134-5p	406.376	347.678	0.855556	-0.225067	0.796264	NEUTRAL	TSPAN18	3.43707	14.8486	2.11108	0.99965	UP
hsa-miR-134-5p	406.376	347.678	0.855556	-0.225067	0.796264	NEUTRAL	TSPAN18	3.43707	14.8486	2.11108	0.99965	UP
hsa-miR-134-5p	406.376	347.678	0.855556	-0.225067	0.796264	NEUTRAL	TSPAN18	3.43707	14.8486	2.11108	0.99965	UP
hsa-miR-6852-5p	15.1807	12.8452	0.846154	-0.241008	0.903482	NEUTRAL	TSPAN18	3.43707	14.8486	2.11108	0.99965	UP
hsa-miR-6852-5p	15.1807	12.8452	0.846154	-0.241008	0.903482	NEUTRAL	TSPAN18	3.43707	14.8486	2.11108	0.99965	UP
hsa-miR-6852-5p	15.1807	12.8452	0.846154	-0.241008	0.903482	NEUTRAL	TSPAN18	3.43707	14.8486	2.11108	0.99965	UP
hsa-miR-6852-5p	15.1807	12.8452	0.846154	-0.241008	0.903482	NEUTRAL	TSPAN18	3.43707	14.8486	2.11108	0.99965	UP
hsa-miR-6852-5p	15.1807	12.8452	0.846154	-0.241008	0.903482	NEUTRAL	TSPAN18	3.43707	14.8486	2.11108	0.99965	UP
hsa-miR-6852-5p	15.1807	12.8452	0.846154	-0.241008	0.903482	NEUTRAL	TSPAN18	3.43707	14.8486	2.11108	0.99965	UP
hsa-miR-7706	54.8842	113.038	2.05957	1.04235	0.295195	UP	COL4A4	0.551506	2.34197	2.08627	0.19677	UP
hsa-miR-665	35.0325	53.95	1.54	0.62293	0.564592	NEUTRAL	COL4A4	0.551506	2.34197	2.08627	0.19677	UP
hsa-miR-550a-5p	14.013	12.8452	0.916667	-0.125531	0.987787	NEUTRAL	COL4A4	0.551506	2.34197	2.08627	0.19677	UP
hsa-miR-6852-5p	15.1807	12.8452	0.846154	-0.241008	0.903482	NEUTRAL	COL4A4	0.551506	2.34197	2.08627	0.19677	UP
hsa-miR-490-3p	35.0325	23.9778	0.684444	-0.546995	0.635402	NEUTRAL	COL4A4	0.551506	2.34197	2.08627	0.19677	UP
hsa-miR-3065-3p	16.3485	4.28174	0.261905	-1.93289	0.153719	DOWN	COL4A4	0.551506	2.34197	2.08627	0.19677	UP
hsa-miR-665	35.0325	53.95	1.54	0.62293	0.564592	NEUTRAL	FAM89A	3.30014	13.8564	2.06995	0.248334	UP
hsa-miR-3909	429.731	447.014	1.04022	0.0568851	0.95088	NEUTRAL	GSTM5	0.155393	0.648707	2.06164	0.99965	UP
hsa-miR-3909	429.731	447.014	1.04022	0.0568851	0.95088	NEUTRAL	GSTM5	0.155393	0.648707	2.06164	0.99965	UP
hsa-miR-3909	429.731	447.014	1.04022	0.0568851	0.95088	NEUTRAL	GSTM5	0.155393	0.648707	2.06164	0.99965	UP
hsa-miR-3909	429.731	447.014	1.04022	0.0568851	0.95088	NEUTRAL	GSTM5	0.155393	0.648707	2.06164	0.99965	UP
hsa-miR-3176	14.013	26.5468	1.89444	0.921775	0.44803	NEUTRAL	SH3RF3	1.73132	7.19409	2.05494	0.0505774	UP
hsa-miR-2277-5p	36.2002	58.2317	1.6086	0.685808	0.520897	NEUTRAL	SH3RF3	1.73132	7.19409	2.05494	0.0505774	UP
hsa-miR-1268b	72.4004	113.038	1.56129	0.642739	0.51546	NEUTRAL	SH3RF3	1.73132	7.19409	2.05494	0.0505774	UP
hsa-miR-3656	741.52	10.2762	0.0138583	-6.17311	2.11383e-08	DOWN	SH3RF3	1.73132	7.19409	2.05494	0.0505774	UP
hsa-miR-93-3p	37.3679	16.2706	0.435417	-1.19953	0.287475	DOWN	CLDN23	0.126554	0.524029	2.0499	0.99965	UP
hsa-miR-874-3p	168.156	259.474	1.54306	0.62579	0.491682	NEUTRAL	OLFML3	51.8014	213.416	2.04261	0.0363525	UP
hsa-miR-874-3p	168.156	259.474	1.54306	0.62579	0.491682	NEUTRAL	OLFML3	51.8014	213.416	2.04261	0.0363525	UP
hsa-miR-874-3p	168.156	259.474	1.54306	0.62579	0.491682	NEUTRAL	OLFML3	51.8014	213.416	2.04261	0.0363525	UP
hsa-miR-874-3p	168.156	259.474	1.54306	0.62579	0.491682	NEUTRAL	OLFML3	51.8014	213.416	2.04261	0.0363525	UP
hsa-miR-330-5p	65.3939	89.9166	1.375	0.459432	0.651801	NEUTRAL	SERPINF1	5.9192	24.1538	2.02877	0.244361	UP
hsa-miR-330-5p	65.3939	89.9166	1.375	0.459432	0.651801	NEUTRAL	SERPINF1	5.9192	24.1538	2.02877	0.244361	UP
hsa-miR-330-5p	65.3939	89.9166	1.375	0.459432	0.651801	NEUTRAL	SERPINF1	5.9192	24.1538	2.02877	0.244361	UP
hsa-miR-330-5p	65.3939	89.9166	1.375	0.459432	0.651801	NEUTRAL	SERPINF1	5.9192	24.1538	2.02877	0.244361	UP
hsa-miR-330-5p	65.3939	89.9166	1.375	0.459432	0.651801	NEUTRAL	SERPINF1	5.9192	24.1538	2.02877	0.244361	UP
hsa-miR-330-5p	65.3939	89.9166	1.375	0.459432	0.651801	NEUTRAL	SERPINF1	5.9192	24.1538	2.02877	0.244361	UP
hsa-miR-5787	12.8452	12.8452	1	0	1	NEUTRAL	SERPINF1	5.9192	24.1538	2.02877	0.244361	UP
hsa-miR-5787	12.8452	12.8452	1	0	1	NEUTRAL	SERPINF1	5.9192	24.1538	2.02877	0.244361	UP
hsa-miR-5787	12.8452	12.8452	1	0	1	NEUTRAL	SERPINF1	5.9192	24.1538	2.02877	0.244361	UP
hsa-miR-5787	12.8452	12.8452	1	0	1	NEUTRAL	SERPINF1	5.9192	24.1538	2.02877	0.244361	UP
hsa-miR-5787	12.8452	12.8452	1	0	1	NEUTRAL	SERPINF1	5.9192	24.1538	2.02877	0.244361	UP
hsa-miR-5787	12.8452	12.8452	1	0	1	NEUTRAL	SERPINF1	5.9192	24.1538	2.02877	0.244361	UP
hsa-miR-5787	12.8452	12.8452	1	0	1	NEUTRAL	SERPINF1	5.9192	24.1538	2.02877	0.244361	UP
hsa-miR-4488	3253.35	2433.74	0.748074	-0.418748	0.612634	NEUTRAL	SERPINF1	5.9192	24.1538	2.02877	0.244361	UP
hsa-miR-331-3p	391.196	240.634	0.615124	-0.70105	0.42477	NEUTRAL	SERPINF1	5.9192	24.1538	2.02877	0.244361	UP
hsa-miR-331-3p	391.196	240.634	0.615124	-0.70105	0.42477	NEUTRAL	SERPINF1	5.9192	24.1538	2.02877	0.244361	UP
hsa-miR-1303	1.16775	8.56349	7.33333	2.87447	0.128943	UP	SELENBP1	2.57184	10.4904	2.0282	0.192753	UP
hsa-miR-1303	1.16775	8.56349	7.33333	2.87447	0.128943	UP	SELENBP1	2.57184	10.4904	2.0282	0.192753	UP
hsa-miR-1303	1.16775	8.56349	7.33333	2.87447	0.128943	UP	SELENBP1	2.57184	10.4904	2.0282	0.192753	UP
hsa-miR-1303	1.16775	8.56349	7.33333	2.87447	0.128943	UP	SELENBP1	2.57184	10.4904	2.0282	0.192753	UP
hsa-miR-1303	1.16775	8.56349	7.33333	2.87447	0.128943	UP	SELENBP1	2.57184	10.4904	2.0282	0.192753	UP
hsa-miR-1303	1.16775	8.56349	7.33333	2.87447	0.128943	UP	SELENBP1	2.57184	10.4904	2.0282	0.192753	UP
hsa-miR-1303	1.16775	8.56349	7.33333	2.87447	0.128943	UP	SELENBP1	2.57184	10.4904	2.0282	0.192753	UP
hsa-miR-1303	1.16775	8.56349	7.33333	2.87447	0.128943	UP	SELENBP1	2.57184	10.4904	2.0282	0.192753	UP
hsa-miR-1303	1.16775	8.56349	7.33333	2.87447	0.128943	UP	SELENBP1	2.57184	10.4904	2.0282	0.192753	UP
hsa-miR-1303	1.16775	8.56349	7.33333	2.87447	0.128943	UP	SELENBP1	2.57184	10.4904	2.0282	0.192753	UP
hsa-miR-1303	1.16775	8.56349	7.33333	2.87447	0.128943	UP	SELENBP1	2.57184	10.4904	2.0282	0.192753	UP
hsa-miR-1303	1.16775	8.56349	7.33333	2.87447	0.128943	UP	SELENBP1	2.57184	10.4904	2.0282	0.192753	UP
hsa-miR-1303	1.16775	8.56349	7.33333	2.87447	0.128943	UP	SELENBP1	2.57184	10.4904	2.0282	0.192753	UP
hsa-miR-146b-3p	18.684	72.7897	3.89583	1.96193	0.0710823	UP	SELENBP1	2.57184	10.4904	2.0282	0.192753	UP
hsa-miR-146b-3p	18.684	72.7897	3.89583	1.96193	0.0710823	UP	SELENBP1	2.57184	10.4904	2.0282	0.192753	UP
hsa-miR-146b-3p	18.684	72.7897	3.89583	1.96193	0.0710823	UP	SELENBP1	2.57184	10.4904	2.0282	0.192753	UP
hsa-miR-146b-3p	18.684	72.7897	3.89583	1.96193	0.0710823	UP	SELENBP1	2.57184	10.4904	2.0282	0.192753	UP
hsa-miR-146b-3p	18.684	72.7897	3.89583	1.96193	0.0710823	UP	SELENBP1	2.57184	10.4904	2.0282	0.192753	UP
hsa-miR-3176	14.013	26.5468	1.89444	0.921775	0.44803	NEUTRAL	SELENBP1	2.57184	10.4904	2.0282	0.192753	UP
hsa-miR-4516	15.1807	63.3698	4.17436	2.06155	0.0638169	UP	ZNF423	0.5328	2.16133	2.02025	0.99965	UP
hsa-miR-665	35.0325	53.95	1.54	0.62293	0.564592	NEUTRAL	ZNF423	0.5328	2.16133	2.02025	0.99965	UP
hsa-miR-4516	15.1807	63.3698	4.17436	2.06155	0.0638169	UP	GLUL	33.7367	136.73	2.01893	0.160264	UP
hsa-miR-4516	15.1807	63.3698	4.17436	2.06155	0.0638169	UP	GLUL	33.7367	136.73	2.01893	0.160264	UP
hsa-miR-940	5.83874	15.4143	2.64	1.40054	0.31347	UP	GLUL	33.7367	136.73	2.01893	0.160264	UP
hsa-miR-940	5.83874	15.4143	2.64	1.40054	0.31347	UP	GLUL	33.7367	136.73	2.01893	0.160264	UP
hsa-miR-940	5.83874	15.4143	2.64	1.40054	0.31347	UP	GLUL	33.7367	136.73	2.01893	0.160264	UP
hsa-miR-1268b	72.4004	113.038	1.56129	0.642739	0.51546	NEUTRAL	GLUL	33.7367	136.73	2.01893	0.160264	UP
hsa-miR-1268b	72.4004	113.038	1.56129	0.642739	0.51546	NEUTRAL	GLUL	33.7367	136.73	2.01893	0.160264	UP
hsa-miR-665	35.0325	53.95	1.54	0.62293	0.564592	NEUTRAL	GLUL	33.7367	136.73	2.01893	0.160264	UP
hsa-miR-665	35.0325	53.95	1.54	0.62293	0.564592	NEUTRAL	GLUL	33.7367	136.73	2.01893	0.160264	UP
hsa-miR-370-5p	12.8452	17.9833	1.4	0.485427	0.73428	NEUTRAL	GLUL	33.7367	136.73	2.01893	0.160264	UP
hsa-miR-370-5p	12.8452	17.9833	1.4	0.485427	0.73428	NEUTRAL	GLUL	33.7367	136.73	2.01893	0.160264	UP
hsa-miR-370-5p	12.8452	17.9833	1.4	0.485427	0.73428	NEUTRAL	GLUL	33.7367	136.73	2.01893	0.160264	UP
hsa-miR-3687	14.013	17.9833	1.28333	0.359896	0.814743	NEUTRAL	GLUL	33.7367	136.73	2.01893	0.160264	UP
hsa-miR-3687	14.013	17.9833	1.28333	0.359896	0.814743	NEUTRAL	GLUL	33.7367	136.73	2.01893	0.160264	UP
hsa-miR-3687	14.013	17.9833	1.28333	0.359896	0.814743	NEUTRAL	GLUL	33.7367	136.73	2.01893	0.160264	UP
hsa-miR-3687	14.013	17.9833	1.28333	0.359896	0.814743	NEUTRAL	GLUL	33.7367	136.73	2.01893	0.160264	UP
hsa-miR-3687	14.013	17.9833	1.28333	0.359896	0.814743	NEUTRAL	GLUL	33.7367	136.73	2.01893	0.160264	UP
hsa-miR-3687	14.013	17.9833	1.28333	0.359896	0.814743	NEUTRAL	GLUL	33.7367	136.73	2.01893	0.160264	UP
hsa-miR-3687	14.013	17.9833	1.28333	0.359896	0.814743	NEUTRAL	GLUL	33.7367	136.73	2.01893	0.160264	UP
hsa-miR-3687	14.013	17.9833	1.28333	0.359896	0.814743	NEUTRAL	GLUL	33.7367	136.73	2.01893	0.160264	UP
hsa-miR-27a-5p	188.007	148.148	0.787992	-0.343748	0.712571	NEUTRAL	GLUL	33.7367	136.73	2.01893	0.160264	UP
hsa-miR-27a-5p	188.007	148.148	0.787992	-0.343748	0.712571	NEUTRAL	GLUL	33.7367	136.73	2.01893	0.160264	UP
hsa-miR-3176	14.013	26.5468	1.89444	0.921775	0.44803	NEUTRAL	TBC1D8	0.546461	2.1931	2.00478	0.99965	UP
hsa-miR-3176	14.013	26.5468	1.89444	0.921775	0.44803	NEUTRAL	TBC1D8	0.546461	2.1931	2.00478	0.99965	UP
hsa-miR-23a-5p	110.936	95.0547	0.856842	-0.222899	0.824966	NEUTRAL	TBC1D8	0.546461	2.1931	2.00478	0.99965	UP
hsa-miR-23a-5p	110.936	95.0547	0.856842	-0.222899	0.824966	NEUTRAL	TBC1D8	0.546461	2.1931	2.00478	0.99965	UP
hsa-miR-149-5p	416.886	306.573	0.735387	-0.443423	0.61018	NEUTRAL	SEPP1	0.17172	0.686924	2.00009	0.782431	UP
hsa-miR-149-5p	416.886	306.573	0.735387	-0.443423	0.61018	NEUTRAL	SEPP1	0.17172	0.686924	2.00009	0.782431	UP
hsa-miR-149-5p	416.886	306.573	0.735387	-0.443423	0.61018	NEUTRAL	SEPP1	0.17172	0.686924	2.00009	0.782431	UP
hsa-miR-149-5p	416.886	306.573	0.735387	-0.443423	0.61018	NEUTRAL	SEPP1	0.17172	0.686924	2.00009	0.782431	UP
hsa-miR-149-5p	416.886	306.573	0.735387	-0.443423	0.61018	NEUTRAL	SEPP1	0.17172	0.686924	2.00009	0.782431	UP
hsa-miR-149-5p	416.886	306.573	0.735387	-0.443423	0.61018	NEUTRAL	SEPP1	0.17172	0.686924	2.00009	0.782431	UP
hsa-miR-149-5p	416.886	306.573	0.735387	-0.443423	0.61018	NEUTRAL	SEPP1	0.17172	0.686924	2.00009	0.782431	UP
hsa-miR-149-5p	416.886	306.573	0.735387	-0.443423	0.61018	NEUTRAL	SEPP1	0.17172	0.686924	2.00009	0.782431	UP
hsa-miR-149-5p	416.886	306.573	0.735387	-0.443423	0.61018	NEUTRAL	SEPP1	0.17172	0.686924	2.00009	0.782431	UP
hsa-miR-149-5p	416.886	306.573	0.735387	-0.443423	0.61018	NEUTRAL	SEPP1	0.17172	0.686924	2.00009	0.782431	UP
hsa-miR-149-5p	416.886	306.573	0.735387	-0.443423	0.61018	NEUTRAL	SEPP1	0.17172	0.686924	2.00009	0.782431	UP
hsa-miR-149-5p	416.886	306.573	0.735387	-0.443423	0.61018	NEUTRAL	SEPP1	0.17172	0.686924	2.00009	0.782431	UP
hsa-miR-149-5p	416.886	306.573	0.735387	-0.443423	0.61018	NEUTRAL	SEPP1	0.17172	0.686924	2.00009	0.782431	UP
hsa-miR-497-5p	464.764	304.004	0.654104	-0.612408	0.479479	NEUTRAL	SEPP1	0.17172	0.686924	2.00009	0.782431	UP
hsa-miR-133a-3p	31.5292	28.2595	0.896296	-0.157952	0.916481	NEUTRAL	ACTC1	0.108878	0.433329	1.99275	0.99965	UP
hsa-miR-497-5p	464.764	304.004	0.654104	-0.612408	0.479479	NEUTRAL	ACTC1	0.108878	0.433329	1.99275	0.99965	UP
hsa-miR-1469	1.16775	8.56349	7.33333	2.87447	0.128943	UP	FAIM3	0.229314	0.912208	1.99204	0.99965	UP
hsa-miR-1469	1.16775	8.56349	7.33333	2.87447	0.128943	UP	FAIM3	0.229314	0.912208	1.99204	0.99965	UP
hsa-miR-1469	1.16775	8.56349	7.33333	2.87447	0.128943	UP	FAIM3	0.229314	0.912208	1.99204	0.99965	UP
hsa-miR-1469	1.16775	8.56349	7.33333	2.87447	0.128943	UP	FAIM3	0.229314	0.912208	1.99204	0.99965	UP
hsa-miR-1285-3p	119.11	183.259	1.53856	0.621583	0.508504	NEUTRAL	FAIM3	0.229314	0.912208	1.99204	0.99965	UP
hsa-miR-6852-5p	15.1807	12.8452	0.846154	-0.241008	0.903482	NEUTRAL	FAIM3	0.229314	0.912208	1.99204	0.99965	UP
hsa-miR-6852-5p	15.1807	12.8452	0.846154	-0.241008	0.903482	NEUTRAL	FAIM3	0.229314	0.912208	1.99204	0.99965	UP
hsa-miR-6852-5p	15.1807	12.8452	0.846154	-0.241008	0.903482	NEUTRAL	FAIM3	0.229314	0.912208	1.99204	0.99965	UP
hsa-miR-6852-5p	15.1807	12.8452	0.846154	-0.241008	0.903482	NEUTRAL	FAIM3	0.229314	0.912208	1.99204	0.99965	UP
hsa-miR-3195	3395.81	1815.46	0.534617	-0.903422	0.277116	NEUTRAL	ADRA1B	0.645	2.5596	1.98855	0.897547	UP
hsa-miR-3960	12.8452	3.4254	0.266667	-1.90689	0.182003	DOWN	ADRA1B	0.645	2.5596	1.98855	0.897547	UP
hsa-miR-615-3p	228.879	602.013	2.63027	1.39521	0.110374	UP	PISD	11.2642	44.1965	1.97219	0.777044	UP
hsa-miR-615-3p	228.879	602.013	2.63027	1.39521	0.110374	UP	PISD	11.2642	44.1965	1.97219	0.777044	UP
hsa-miR-615-3p	228.879	602.013	2.63027	1.39521	0.110374	UP	PISD	11.2642	44.1965	1.97219	0.777044	UP
hsa-miR-615-3p	228.879	602.013	2.63027	1.39521	0.110374	UP	PISD	11.2642	44.1965	1.97219	0.777044	UP
hsa-miR-615-3p	228.879	602.013	2.63027	1.39521	0.110374	UP	PISD	11.2642	44.1965	1.97219	0.777044	UP
hsa-miR-615-3p	228.879	602.013	2.63027	1.39521	0.110374	UP	PISD	11.2642	44.1965	1.97219	0.777044	UP
hsa-miR-615-3p	228.879	602.013	2.63027	1.39521	0.110374	UP	PISD	11.2642	44.1965	1.97219	0.777044	UP
hsa-miR-615-3p	228.879	602.013	2.63027	1.39521	0.110374	UP	PISD	11.2642	44.1965	1.97219	0.777044	UP
hsa-miR-615-3p	228.879	602.013	2.63027	1.39521	0.110374	UP	PISD	11.2642	44.1965	1.97219	0.777044	UP
hsa-miR-370-3p	175.162	376.793	2.15111	1.10508	0.216401	UP	PISD	11.2642	44.1965	1.97219	0.777044	UP
hsa-miR-370-3p	175.162	376.793	2.15111	1.10508	0.216401	UP	PISD	11.2642	44.1965	1.97219	0.777044	UP
hsa-miR-370-3p	175.162	376.793	2.15111	1.10508	0.216401	UP	PISD	11.2642	44.1965	1.97219	0.777044	UP
hsa-miR-370-3p	175.162	376.793	2.15111	1.10508	0.216401	UP	PISD	11.2642	44.1965	1.97219	0.777044	UP
hsa-miR-370-3p	175.162	376.793	2.15111	1.10508	0.216401	UP	PISD	11.2642	44.1965	1.97219	0.777044	UP
hsa-miR-370-3p	175.162	376.793	2.15111	1.10508	0.216401	UP	PISD	11.2642	44.1965	1.97219	0.777044	UP
hsa-miR-7706	54.8842	113.038	2.05957	1.04235	0.295195	UP	PISD	11.2642	44.1965	1.97219	0.777044	UP
hsa-miR-665	35.0325	53.95	1.54	0.62293	0.564592	NEUTRAL	PISD	11.2642	44.1965	1.97219	0.777044	UP
hsa-miR-665	35.0325	53.95	1.54	0.62293	0.564592	NEUTRAL	PISD	11.2642	44.1965	1.97219	0.777044	UP
hsa-miR-431-3p	68.8972	49.6682	0.720904	-0.472121	0.650903	NEUTRAL	PISD	11.2642	44.1965	1.97219	0.777044	UP
hsa-miR-431-3p	68.8972	49.6682	0.720904	-0.472121	0.650903	NEUTRAL	PISD	11.2642	44.1965	1.97219	0.777044	UP
hsa-miR-431-3p	68.8972	49.6682	0.720904	-0.472121	0.650903	NEUTRAL	PISD	11.2642	44.1965	1.97219	0.777044	UP
hsa-miR-431-3p	68.8972	49.6682	0.720904	-0.472121	0.650903	NEUTRAL	PISD	11.2642	44.1965	1.97219	0.777044	UP
hsa-miR-431-3p	68.8972	49.6682	0.720904	-0.472121	0.650903	NEUTRAL	PISD	11.2642	44.1965	1.97219	0.777044	UP
hsa-miR-431-3p	68.8972	49.6682	0.720904	-0.472121	0.650903	NEUTRAL	PISD	11.2642	44.1965	1.97219	0.777044	UP
hsa-miR-431-3p	68.8972	49.6682	0.720904	-0.472121	0.650903	NEUTRAL	PISD	11.2642	44.1965	1.97219	0.777044	UP
hsa-miR-431-3p	68.8972	49.6682	0.720904	-0.472121	0.650903	NEUTRAL	PISD	11.2642	44.1965	1.97219	0.777044	UP
hsa-miR-431-3p	68.8972	49.6682	0.720904	-0.472121	0.650903	NEUTRAL	PISD	11.2642	44.1965	1.97219	0.777044	UP
hsa-miR-431-3p	68.8972	49.6682	0.720904	-0.472121	0.650903	NEUTRAL	PISD	11.2642	44.1965	1.97219	0.777044	UP
hsa-miR-431-3p	68.8972	49.6682	0.720904	-0.472121	0.650903	NEUTRAL	PISD	11.2642	44.1965	1.97219	0.777044	UP
hsa-miR-431-3p	68.8972	49.6682	0.720904	-0.472121	0.650903	NEUTRAL	PISD	11.2642	44.1965	1.97219	0.777044	UP
hsa-miR-1260b	15.1807	8.56349	0.564103	-0.825971	0.546679	NEUTRAL	SLC26A10	0.403396	1.57672	1.96665	0.99965	UP
hsa-miR-1260b	15.1807	8.56349	0.564103	-0.825971	0.546679	NEUTRAL	SLC26A10	0.403396	1.57672	1.96665	0.99965	UP
hsa-miR-1260b	15.1807	8.56349	0.564103	-0.825971	0.546679	NEUTRAL	SLC26A10	0.403396	1.57672	1.96665	0.99965	UP
hsa-miR-1469	1.16775	8.56349	7.33333	2.87447	0.128943	UP	SRRM3	0.212943	0.825265	1.95439	0.99965	UP
hsa-miR-3176	14.013	26.5468	1.89444	0.921775	0.44803	NEUTRAL	SRRM3	0.212943	0.825265	1.95439	0.99965	UP
hsa-miR-3176	14.013	26.5468	1.89444	0.921775	0.44803	NEUTRAL	SRRM3	0.212943	0.825265	1.95439	0.99965	UP
hsa-miR-4466	12.8452	21.4087	1.66667	0.736966	0.567146	NEUTRAL	SRRM3	0.212943	0.825265	1.95439	0.99965	UP
hsa-miR-4466	12.8452	21.4087	1.66667	0.736966	0.567146	NEUTRAL	SRRM3	0.212943	0.825265	1.95439	0.99965	UP
hsa-miR-25-3p	2752.38	2356.67	0.85623	-0.22393	0.785844	NEUTRAL	SRRM3	0.212943	0.825265	1.95439	0.99965	UP
hsa-miR-6852-5p	15.1807	12.8452	0.846154	-0.241008	0.903482	NEUTRAL	SRRM3	0.212943	0.825265	1.95439	0.99965	UP
hsa-miR-4532	44613.8	18135.8	0.406505	-1.29865	0.174811	DOWN	SRRM3	0.212943	0.825265	1.95439	0.99965	UP
hsa-miR-1301-3p	18.684	19.696	1.05417	0.076103	1	NEUTRAL	TLE2	1.64244	6.33785	1.94815	0.238277	UP
hsa-miR-1301-3p	18.684	19.696	1.05417	0.076103	1	NEUTRAL	TLE2	1.64244	6.33785	1.94815	0.238277	UP
hsa-miR-1301-3p	18.684	19.696	1.05417	0.076103	1	NEUTRAL	TLE2	1.64244	6.33785	1.94815	0.238277	UP
hsa-miR-1301-3p	18.684	19.696	1.05417	0.076103	1	NEUTRAL	TLE2	1.64244	6.33785	1.94815	0.238277	UP
hsa-miR-1301-3p	18.684	19.696	1.05417	0.076103	1	NEUTRAL	TLE2	1.64244	6.33785	1.94815	0.238277	UP
hsa-miR-1301-3p	18.684	19.696	1.05417	0.076103	1	NEUTRAL	TLE2	1.64244	6.33785	1.94815	0.238277	UP
hsa-miR-1301-3p	18.684	19.696	1.05417	0.076103	1	NEUTRAL	TLE2	1.64244	6.33785	1.94815	0.238277	UP
hsa-miR-1301-3p	18.684	19.696	1.05417	0.076103	1	NEUTRAL	TLE2	1.64244	6.33785	1.94815	0.238277	UP
hsa-miR-6852-5p	15.1807	12.8452	0.846154	-0.241008	0.903482	NEUTRAL	TLE2	1.64244	6.33785	1.94815	0.238277	UP
hsa-miR-6852-5p	15.1807	12.8452	0.846154	-0.241008	0.903482	NEUTRAL	TLE2	1.64244	6.33785	1.94815	0.238277	UP
hsa-miR-6852-5p	15.1807	12.8452	0.846154	-0.241008	0.903482	NEUTRAL	TLE2	1.64244	6.33785	1.94815	0.238277	UP
hsa-miR-6852-5p	15.1807	12.8452	0.846154	-0.241008	0.903482	NEUTRAL	TLE2	1.64244	6.33785	1.94815	0.238277	UP
hsa-miR-331-3p	391.196	240.634	0.615124	-0.70105	0.42477	NEUTRAL	TLE2	1.64244	6.33785	1.94815	0.238277	UP
hsa-miR-331-3p	391.196	240.634	0.615124	-0.70105	0.42477	NEUTRAL	TLE2	1.64244	6.33785	1.94815	0.238277	UP
hsa-miR-331-3p	391.196	240.634	0.615124	-0.70105	0.42477	NEUTRAL	TLE2	1.64244	6.33785	1.94815	0.238277	UP
hsa-miR-331-3p	391.196	240.634	0.615124	-0.70105	0.42477	NEUTRAL	TLE2	1.64244	6.33785	1.94815	0.238277	UP
hsa-miR-615-3p	228.879	602.013	2.63027	1.39521	0.110374	UP	NPAS1	2.65362	10.2292	1.94666	0.560098	UP
hsa-miR-3176	14.013	26.5468	1.89444	0.921775	0.44803	NEUTRAL	NPAS1	2.65362	10.2292	1.94666	0.560098	UP
hsa-miR-3176	14.013	26.5468	1.89444	0.921775	0.44803	NEUTRAL	NPAS1	2.65362	10.2292	1.94666	0.560098	UP
hsa-miR-3176	14.013	26.5468	1.89444	0.921775	0.44803	NEUTRAL	NPAS1	2.65362	10.2292	1.94666	0.560098	UP
hsa-miR-3176	14.013	26.5468	1.89444	0.921775	0.44803	NEUTRAL	NPAS1	2.65362	10.2292	1.94666	0.560098	UP
hsa-miR-3176	14.013	26.5468	1.89444	0.921775	0.44803	NEUTRAL	NPAS1	2.65362	10.2292	1.94666	0.560098	UP
hsa-miR-2277-5p	36.2002	58.2317	1.6086	0.685808	0.520897	NEUTRAL	NPAS1	2.65362	10.2292	1.94666	0.560098	UP
hsa-miR-2277-5p	36.2002	58.2317	1.6086	0.685808	0.520897	NEUTRAL	NPAS1	2.65362	10.2292	1.94666	0.560098	UP
hsa-miR-671-5p	58.3874	71.077	1.21733	0.283724	0.792222	NEUTRAL	NPAS1	2.65362	10.2292	1.94666	0.560098	UP
hsa-miR-671-5p	58.3874	71.077	1.21733	0.283724	0.792222	NEUTRAL	NPAS1	2.65362	10.2292	1.94666	0.560098	UP
hsa-miR-671-5p	58.3874	71.077	1.21733	0.283724	0.792222	NEUTRAL	NPAS1	2.65362	10.2292	1.94666	0.560098	UP
hsa-miR-671-5p	58.3874	71.077	1.21733	0.283724	0.792222	NEUTRAL	NPAS1	2.65362	10.2292	1.94666	0.560098	UP
hsa-miR-3615	81.7424	93.342	1.1419	0.191442	0.856957	NEUTRAL	NPAS1	2.65362	10.2292	1.94666	0.560098	UP
hsa-miR-887-5p	7.00649	28.2595	4.03333	2.01197	0.110699	UP	MACROD2	0.179883	0.692956	1.94571	0.99965	UP
hsa-miR-887-5p	7.00649	28.2595	4.03333	2.01197	0.110699	UP	MACROD2	0.179883	0.692956	1.94571	0.99965	UP
hsa-miR-887-5p	7.00649	28.2595	4.03333	2.01197	0.110699	UP	MACROD2	0.179883	0.692956	1.94571	0.99965	UP
hsa-miR-1285-3p	119.11	183.259	1.53856	0.621583	0.508504	NEUTRAL	MACROD2	0.179883	0.692956	1.94571	0.99965	UP
hsa-miR-370-5p	12.8452	17.9833	1.4	0.485427	0.73428	NEUTRAL	MACROD2	0.179883	0.692956	1.94571	0.99965	UP
hsa-miR-5787	12.8452	12.8452	1	0	1	NEUTRAL	MACROD2	0.179883	0.692956	1.94571	0.99965	UP
hsa-miR-5787	12.8452	12.8452	1	0	1	NEUTRAL	MACROD2	0.179883	0.692956	1.94571	0.99965	UP
hsa-miR-5787	12.8452	12.8452	1	0	1	NEUTRAL	MACROD2	0.179883	0.692956	1.94571	0.99965	UP
hsa-miR-5787	12.8452	12.8452	1	0	1	NEUTRAL	MACROD2	0.179883	0.692956	1.94571	0.99965	UP
hsa-miR-23a-5p	110.936	95.0547	0.856842	-0.222899	0.824966	NEUTRAL	RP11-874G11.1	0.141747	0.544134	1.94064	0.99965	UP
hsa-miR-1304-3p	161.149	160.994	0.999034	-0.00139458	1	NEUTRAL	KCNK6	2.10425	8.04893	1.93549	0.163295	UP
hsa-miR-550a-5p	14.013	12.8452	0.916667	-0.125531	0.987787	NEUTRAL	KCNK6	2.10425	8.04893	1.93549	0.163295	UP
hsa-miR-7706	54.8842	113.038	2.05957	1.04235	0.295195	UP	TRIM47	1.14374	4.37145	1.93435	0.882036	UP
hsa-miR-7706	54.8842	113.038	2.05957	1.04235	0.295195	UP	TRIM47	1.14374	4.37145	1.93435	0.882036	UP
hsa-miR-7706	54.8842	113.038	2.05957	1.04235	0.295195	UP	TRIM47	1.14374	4.37145	1.93435	0.882036	UP
hsa-miR-4326	22.1872	29.9722	1.35088	0.433897	0.725686	NEUTRAL	TRIM47	1.14374	4.37145	1.93435	0.882036	UP
hsa-miR-4326	22.1872	29.9722	1.35088	0.433897	0.725686	NEUTRAL	TRIM47	1.14374	4.37145	1.93435	0.882036	UP
hsa-miR-4326	22.1872	29.9722	1.35088	0.433897	0.725686	NEUTRAL	TRIM47	1.14374	4.37145	1.93435	0.882036	UP
hsa-miR-671-5p	58.3874	71.077	1.21733	0.283724	0.792222	NEUTRAL	TRIM47	1.14374	4.37145	1.93435	0.882036	UP
hsa-miR-671-5p	58.3874	71.077	1.21733	0.283724	0.792222	NEUTRAL	TRIM47	1.14374	4.37145	1.93435	0.882036	UP
hsa-miR-4497	830.269	540.356	0.65082	-0.619669	0.460882	NEUTRAL	TRIM47	1.14374	4.37145	1.93435	0.882036	UP
hsa-miR-125a-5p	25628.6	48257.8	1.88297	0.91301	0.344622	NEUTRAL	DAPK1	3.7528	14.3284	1.93284	0.0505774	UP
hsa-miR-125a-5p	25628.6	48257.8	1.88297	0.91301	0.344622	NEUTRAL	DAPK1	3.7528	14.3284	1.93284	0.0505774	UP
hsa-miR-2277-3p	8.17424	12.8452	1.57143	0.652077	0.672249	NEUTRAL	DAPK1	3.7528	14.3284	1.93284	0.0505774	UP
hsa-miR-2277-3p	8.17424	12.8452	1.57143	0.652077	0.672249	NEUTRAL	DAPK1	3.7528	14.3284	1.93284	0.0505774	UP
hsa-miR-2277-3p	8.17424	12.8452	1.57143	0.652077	0.672249	NEUTRAL	DAPK1	3.7528	14.3284	1.93284	0.0505774	UP
hsa-miR-2277-3p	8.17424	12.8452	1.57143	0.652077	0.672249	NEUTRAL	DAPK1	3.7528	14.3284	1.93284	0.0505774	UP
hsa-miR-2277-3p	8.17424	12.8452	1.57143	0.652077	0.672249	NEUTRAL	DAPK1	3.7528	14.3284	1.93284	0.0505774	UP
hsa-miR-1268b	72.4004	113.038	1.56129	0.642739	0.51546	NEUTRAL	DAPK1	3.7528	14.3284	1.93284	0.0505774	UP
hsa-miR-1268b	72.4004	113.038	1.56129	0.642739	0.51546	NEUTRAL	DAPK1	3.7528	14.3284	1.93284	0.0505774	UP
hsa-miR-1268b	72.4004	113.038	1.56129	0.642739	0.51546	NEUTRAL	DAPK1	3.7528	14.3284	1.93284	0.0505774	UP
hsa-miR-1268b	72.4004	113.038	1.56129	0.642739	0.51546	NEUTRAL	DAPK1	3.7528	14.3284	1.93284	0.0505774	UP
hsa-miR-1268b	72.4004	113.038	1.56129	0.642739	0.51546	NEUTRAL	DAPK1	3.7528	14.3284	1.93284	0.0505774	UP
hsa-miR-1268b	72.4004	113.038	1.56129	0.642739	0.51546	NEUTRAL	DAPK1	3.7528	14.3284	1.93284	0.0505774	UP
hsa-miR-1268b	72.4004	113.038	1.56129	0.642739	0.51546	NEUTRAL	DAPK1	3.7528	14.3284	1.93284	0.0505774	UP
hsa-miR-874-3p	168.156	259.474	1.54306	0.62579	0.491682	NEUTRAL	DAPK1	3.7528	14.3284	1.93284	0.0505774	UP
hsa-miR-874-3p	168.156	259.474	1.54306	0.62579	0.491682	NEUTRAL	DAPK1	3.7528	14.3284	1.93284	0.0505774	UP
hsa-miR-874-3p	168.156	259.474	1.54306	0.62579	0.491682	NEUTRAL	DAPK1	3.7528	14.3284	1.93284	0.0505774	UP
hsa-miR-874-3p	168.156	259.474	1.54306	0.62579	0.491682	NEUTRAL	DAPK1	3.7528	14.3284	1.93284	0.0505774	UP
hsa-miR-874-3p	168.156	259.474	1.54306	0.62579	0.491682	NEUTRAL	DAPK1	3.7528	14.3284	1.93284	0.0505774	UP
hsa-miR-874-3p	168.156	259.474	1.54306	0.62579	0.491682	NEUTRAL	DAPK1	3.7528	14.3284	1.93284	0.0505774	UP
hsa-miR-874-3p	168.156	259.474	1.54306	0.62579	0.491682	NEUTRAL	DAPK1	3.7528	14.3284	1.93284	0.0505774	UP
hsa-miR-140-3p	2426.58	2252.2	0.928136	-0.107592	0.895859	NEUTRAL	DAPK1	3.7528	14.3284	1.93284	0.0505774	UP
hsa-miR-431-3p	68.8972	49.6682	0.720904	-0.472121	0.650903	NEUTRAL	DAPK1	3.7528	14.3284	1.93284	0.0505774	UP
hsa-miR-431-3p	68.8972	49.6682	0.720904	-0.472121	0.650903	NEUTRAL	DAPK1	3.7528	14.3284	1.93284	0.0505774	UP
hsa-miR-431-3p	68.8972	49.6682	0.720904	-0.472121	0.650903	NEUTRAL	DAPK1	3.7528	14.3284	1.93284	0.0505774	UP
hsa-miR-431-3p	68.8972	49.6682	0.720904	-0.472121	0.650903	NEUTRAL	DAPK1	3.7528	14.3284	1.93284	0.0505774	UP
hsa-miR-431-3p	68.8972	49.6682	0.720904	-0.472121	0.650903	NEUTRAL	DAPK1	3.7528	14.3284	1.93284	0.0505774	UP
hsa-miR-431-3p	68.8972	49.6682	0.720904	-0.472121	0.650903	NEUTRAL	DAPK1	3.7528	14.3284	1.93284	0.0505774	UP
hsa-miR-431-3p	68.8972	49.6682	0.720904	-0.472121	0.650903	NEUTRAL	DAPK1	3.7528	14.3284	1.93284	0.0505774	UP
hsa-miR-485-5p	217.201	146.436	0.674194	-0.568765	0.536305	NEUTRAL	DAPK1	3.7528	14.3284	1.93284	0.0505774	UP
hsa-miR-485-5p	217.201	146.436	0.674194	-0.568765	0.536305	NEUTRAL	DAPK1	3.7528	14.3284	1.93284	0.0505774	UP
hsa-miR-485-5p	217.201	146.436	0.674194	-0.568765	0.536305	NEUTRAL	DAPK1	3.7528	14.3284	1.93284	0.0505774	UP
hsa-miR-485-5p	217.201	146.436	0.674194	-0.568765	0.536305	NEUTRAL	DAPK1	3.7528	14.3284	1.93284	0.0505774	UP
hsa-miR-485-5p	217.201	146.436	0.674194	-0.568765	0.536305	NEUTRAL	DAPK1	3.7528	14.3284	1.93284	0.0505774	UP
hsa-miR-485-5p	217.201	146.436	0.674194	-0.568765	0.536305	NEUTRAL	DAPK1	3.7528	14.3284	1.93284	0.0505774	UP
hsa-miR-485-5p	217.201	146.436	0.674194	-0.568765	0.536305	NEUTRAL	DAPK1	3.7528	14.3284	1.93284	0.0505774	UP
hsa-miR-758-5p	12.8452	3.4254	0.266667	-1.90689	0.182003	DOWN	DAPK1	3.7528	14.3284	1.93284	0.0505774	UP
hsa-miR-758-5p	12.8452	3.4254	0.266667	-1.90689	0.182003	DOWN	DAPK1	3.7528	14.3284	1.93284	0.0505774	UP
hsa-miR-758-5p	12.8452	3.4254	0.266667	-1.90689	0.182003	DOWN	DAPK1	3.7528	14.3284	1.93284	0.0505774	UP
hsa-miR-758-5p	12.8452	3.4254	0.266667	-1.90689	0.182003	DOWN	DAPK1	3.7528	14.3284	1.93284	0.0505774	UP
hsa-miR-758-5p	12.8452	3.4254	0.266667	-1.90689	0.182003	DOWN	DAPK1	3.7528	14.3284	1.93284	0.0505774	UP
hsa-miR-758-5p	12.8452	3.4254	0.266667	-1.90689	0.182003	DOWN	DAPK1	3.7528	14.3284	1.93284	0.0505774	UP
hsa-miR-758-5p	12.8452	3.4254	0.266667	-1.90689	0.182003	DOWN	DAPK1	3.7528	14.3284	1.93284	0.0505774	UP
hsa-miR-1469	1.16775	8.56349	7.33333	2.87447	0.128943	UP	ID1	10.028	38.1473	1.92755	0.175238	UP
hsa-miR-1469	1.16775	8.56349	7.33333	2.87447	0.128943	UP	ID1	10.028	38.1473	1.92755	0.175238	UP
hsa-miR-431-5p	463.596	691.93	1.49253	0.577757	0.496199	NEUTRAL	ID1	10.028	38.1473	1.92755	0.175238	UP
hsa-miR-431-5p	463.596	691.93	1.49253	0.577757	0.496199	NEUTRAL	ID1	10.028	38.1473	1.92755	0.175238	UP
hsa-miR-1285-3p	119.11	183.259	1.53856	0.621583	0.508504	NEUTRAL	RP11-867G23.8	0.443037	1.68016	1.9231	0.99965	UP
hsa-miR-1469	1.16775	8.56349	7.33333	2.87447	0.128943	UP	PLAC9	7.57823	28.6622	1.91922	0.375252	UP
hsa-miR-1469	1.16775	8.56349	7.33333	2.87447	0.128943	UP	PLAC9	7.57823	28.6622	1.91922	0.375252	UP
hsa-miR-589-3p	28.026	65.0825	2.32222	1.21551	0.252622	UP	ATRNL1	0.116357	0.438264	1.91324	0.99965	UP
hsa-miR-665	35.0325	53.95	1.54	0.62293	0.564592	NEUTRAL	ATRNL1	0.116357	0.438264	1.91324	0.99965	UP
hsa-miR-665	35.0325	53.95	1.54	0.62293	0.564592	NEUTRAL	ATRNL1	0.116357	0.438264	1.91324	0.99965	UP
hsa-miR-665	35.0325	53.95	1.54	0.62293	0.564592	NEUTRAL	ATRNL1	0.116357	0.438264	1.91324	0.99965	UP
hsa-miR-5787	12.8452	12.8452	1	0	1	NEUTRAL	ATRNL1	0.116357	0.438264	1.91324	0.99965	UP
hsa-miR-5787	12.8452	12.8452	1	0	1	NEUTRAL	ATRNL1	0.116357	0.438264	1.91324	0.99965	UP
hsa-miR-5787	12.8452	12.8452	1	0	1	NEUTRAL	ATRNL1	0.116357	0.438264	1.91324	0.99965	UP
hsa-miR-210-5p	343.318	101.049	0.294331	-1.76449	0.0554073	DOWN	ATRNL1	0.116357	0.438264	1.91324	0.99965	UP
hsa-miR-210-5p	343.318	101.049	0.294331	-1.76449	0.0554073	DOWN	ATRNL1	0.116357	0.438264	1.91324	0.99965	UP
hsa-miR-210-5p	343.318	101.049	0.294331	-1.76449	0.0554073	DOWN	ATRNL1	0.116357	0.438264	1.91324	0.99965	UP
hsa-miR-1307-5p	579.203	1323.06	2.28427	1.19174	0.156107	UP	CDH8	0.144269	0.5422	1.91006	0.99965	UP
hsa-miR-1307-5p	579.203	1323.06	2.28427	1.19174	0.156107	UP	CDH8	0.144269	0.5422	1.91006	0.99965	UP
hsa-miR-1307-5p	579.203	1323.06	2.28427	1.19174	0.156107	UP	CDH8	0.144269	0.5422	1.91006	0.99965	UP
hsa-miR-1307-5p	579.203	1323.06	2.28427	1.19174	0.156107	UP	CDH8	0.144269	0.5422	1.91006	0.99965	UP
hsa-miR-1307-5p	579.203	1323.06	2.28427	1.19174	0.156107	UP	CDH8	0.144269	0.5422	1.91006	0.99965	UP
hsa-miR-181a-5p	128996	108529	0.841336	-0.249246	0.819909	NEUTRAL	CDH8	0.144269	0.5422	1.91006	0.99965	UP
hsa-miR-181a-5p	128996	108529	0.841336	-0.249246	0.819909	NEUTRAL	CDH8	0.144269	0.5422	1.91006	0.99965	UP
hsa-miR-181a-5p	128996	108529	0.841336	-0.249246	0.819909	NEUTRAL	CDH8	0.144269	0.5422	1.91006	0.99965	UP
hsa-miR-3960	12.8452	3.4254	0.266667	-1.90689	0.182003	DOWN	CDH8	0.144269	0.5422	1.91006	0.99965	UP
hsa-miR-3960	12.8452	3.4254	0.266667	-1.90689	0.182003	DOWN	CDH8	0.144269	0.5422	1.91006	0.99965	UP
hsa-miR-3960	12.8452	3.4254	0.266667	-1.90689	0.182003	DOWN	CDH8	0.144269	0.5422	1.91006	0.99965	UP
hsa-miR-3960	12.8452	3.4254	0.266667	-1.90689	0.182003	DOWN	CDH8	0.144269	0.5422	1.91006	0.99965	UP
hsa-miR-1285-3p	119.11	183.259	1.53856	0.621583	0.508504	NEUTRAL	DAPK2	0.751683	2.8097	1.90222	0.99965	UP
hsa-miR-4454	51.3809	77.9277	1.51667	0.600904	0.560022	NEUTRAL	DAPK2	0.751683	2.8097	1.90222	0.99965	UP
hsa-miR-3200-3p	15.1807	10.2762	0.676923	-0.562936	0.696476	NEUTRAL	DAPK2	0.751683	2.8097	1.90222	0.99965	UP
hsa-miR-3200-3p	15.1807	10.2762	0.676923	-0.562936	0.696476	NEUTRAL	DAPK2	0.751683	2.8097	1.90222	0.99965	UP
hsa-miR-345-5p	463.596	673.09	1.45189	0.537931	0.526699	NEUTRAL	SNTG2	0.168351	0.629167	1.90197	0.99965	UP
hsa-miR-345-5p	463.596	673.09	1.45189	0.537931	0.526699	NEUTRAL	SNTG2	0.168351	0.629167	1.90197	0.99965	UP
hsa-miR-152-3p	1319.56	1103.83	0.836519	-0.257529	0.755175	NEUTRAL	SNTG2	0.168351	0.629167	1.90197	0.99965	UP
hsa-miR-152-3p	1319.56	1103.83	0.836519	-0.257529	0.755175	NEUTRAL	SNTG2	0.168351	0.629167	1.90197	0.99965	UP
hsa-miR-152-3p	1319.56	1103.83	0.836519	-0.257529	0.755175	NEUTRAL	SNTG2	0.168351	0.629167	1.90197	0.99965	UP
hsa-miR-152-3p	1319.56	1103.83	0.836519	-0.257529	0.755175	NEUTRAL	SNTG2	0.168351	0.629167	1.90197	0.99965	UP
hsa-miR-769-3p	7.00649	8.56349	1.22222	0.289507	0.938956	NEUTRAL	MAPT	0.134134	0.500927	1.90093	0.99965	UP
hsa-miR-769-3p	7.00649	8.56349	1.22222	0.289507	0.938956	NEUTRAL	MAPT	0.134134	0.500927	1.90093	0.99965	UP
hsa-miR-769-3p	7.00649	8.56349	1.22222	0.289507	0.938956	NEUTRAL	MAPT	0.134134	0.500927	1.90093	0.99965	UP
hsa-miR-769-3p	7.00649	8.56349	1.22222	0.289507	0.938956	NEUTRAL	MAPT	0.134134	0.500927	1.90093	0.99965	UP
hsa-miR-769-3p	7.00649	8.56349	1.22222	0.289507	0.938956	NEUTRAL	MAPT	0.134134	0.500927	1.90093	0.99965	UP
hsa-miR-769-3p	7.00649	8.56349	1.22222	0.289507	0.938956	NEUTRAL	MAPT	0.134134	0.500927	1.90093	0.99965	UP
hsa-miR-769-3p	7.00649	8.56349	1.22222	0.289507	0.938956	NEUTRAL	MAPT	0.134134	0.500927	1.90093	0.99965	UP
hsa-miR-769-3p	7.00649	8.56349	1.22222	0.289507	0.938956	NEUTRAL	MAPT	0.134134	0.500927	1.90093	0.99965	UP
hsa-miR-769-3p	7.00649	8.56349	1.22222	0.289507	0.938956	NEUTRAL	MAPT	0.134134	0.500927	1.90093	0.99965	UP
hsa-miR-769-3p	7.00649	8.56349	1.22222	0.289507	0.938956	NEUTRAL	MAPT	0.134134	0.500927	1.90093	0.99965	UP
hsa-miR-769-3p	7.00649	8.56349	1.22222	0.289507	0.938956	NEUTRAL	MAPT	0.134134	0.500927	1.90093	0.99965	UP
hsa-miR-769-3p	7.00649	8.56349	1.22222	0.289507	0.938956	NEUTRAL	MAPT	0.134134	0.500927	1.90093	0.99965	UP
hsa-miR-769-3p	7.00649	8.56349	1.22222	0.289507	0.938956	NEUTRAL	MAPT	0.134134	0.500927	1.90093	0.99965	UP
hsa-miR-769-3p	7.00649	8.56349	1.22222	0.289507	0.938956	NEUTRAL	MAPT	0.134134	0.500927	1.90093	0.99965	UP
hsa-miR-769-3p	7.00649	8.56349	1.22222	0.289507	0.938956	NEUTRAL	MAPT	0.134134	0.500927	1.90093	0.99965	UP
hsa-miR-671-5p	58.3874	71.077	1.21733	0.283724	0.792222	NEUTRAL	MAPT	0.134134	0.500927	1.90093	0.99965	UP
hsa-miR-671-5p	58.3874	71.077	1.21733	0.283724	0.792222	NEUTRAL	MAPT	0.134134	0.500927	1.90093	0.99965	UP
hsa-miR-671-5p	58.3874	71.077	1.21733	0.283724	0.792222	NEUTRAL	MAPT	0.134134	0.500927	1.90093	0.99965	UP
hsa-miR-671-5p	58.3874	71.077	1.21733	0.283724	0.792222	NEUTRAL	MAPT	0.134134	0.500927	1.90093	0.99965	UP
hsa-miR-671-5p	58.3874	71.077	1.21733	0.283724	0.792222	NEUTRAL	MAPT	0.134134	0.500927	1.90093	0.99965	UP
hsa-miR-671-5p	58.3874	71.077	1.21733	0.283724	0.792222	NEUTRAL	MAPT	0.134134	0.500927	1.90093	0.99965	UP
hsa-miR-671-5p	58.3874	71.077	1.21733	0.283724	0.792222	NEUTRAL	MAPT	0.134134	0.500927	1.90093	0.99965	UP
hsa-miR-5787	12.8452	12.8452	1	0	1	NEUTRAL	MAPT	0.134134	0.500927	1.90093	0.99965	UP
hsa-miR-5787	12.8452	12.8452	1	0	1	NEUTRAL	MAPT	0.134134	0.500927	1.90093	0.99965	UP
hsa-miR-5787	12.8452	12.8452	1	0	1	NEUTRAL	MAPT	0.134134	0.500927	1.90093	0.99965	UP
hsa-miR-5787	12.8452	12.8452	1	0	1	NEUTRAL	MAPT	0.134134	0.500927	1.90093	0.99965	UP
hsa-miR-5787	12.8452	12.8452	1	0	1	NEUTRAL	MAPT	0.134134	0.500927	1.90093	0.99965	UP
hsa-miR-5787	12.8452	12.8452	1	0	1	NEUTRAL	MAPT	0.134134	0.500927	1.90093	0.99965	UP
hsa-miR-5787	12.8452	12.8452	1	0	1	NEUTRAL	MAPT	0.134134	0.500927	1.90093	0.99965	UP
hsa-miR-1469	1.16775	8.56349	7.33333	2.87447	0.128943	UP	IRS2	3.57726	13.2812	1.89246	0.0545288	UP
hsa-miR-4516	15.1807	63.3698	4.17436	2.06155	0.0638169	UP	IRS2	3.57726	13.2812	1.89246	0.0545288	UP
hsa-miR-4466	12.8452	21.4087	1.66667	0.736966	0.567146	NEUTRAL	IRS2	3.57726	13.2812	1.89246	0.0545288	UP
hsa-miR-2277-5p	36.2002	58.2317	1.6086	0.685808	0.520897	NEUTRAL	IRS2	3.57726	13.2812	1.89246	0.0545288	UP
hsa-miR-941	1125.71	1156.07	1.02697	0.0383954	0.965034	NEUTRAL	IRS2	3.57726	13.2812	1.89246	0.0545288	UP
hsa-miR-744-5p	850.121	678.228	0.797802	-0.325897	0.696683	NEUTRAL	IRS2	3.57726	13.2812	1.89246	0.0545288	UP
hsa-miR-708-5p	418.054	175.552	0.419926	-1.25179	0.159186	DOWN	IRS2	3.57726	13.2812	1.89246	0.0545288	UP
hsa-miR-3960	12.8452	3.4254	0.266667	-1.90689	0.182003	DOWN	IRS2	3.57726	13.2812	1.89246	0.0545288	UP
hsa-miR-4488	3253.35	2433.74	0.748074	-0.418748	0.612634	NEUTRAL	FAM160A1	0.127445	0.470864	1.88543	0.99965	UP
hsa-miR-4488	3253.35	2433.74	0.748074	-0.418748	0.612634	NEUTRAL	FAM160A1	0.127445	0.470864	1.88543	0.99965	UP
hsa-miR-4488	3253.35	2433.74	0.748074	-0.418748	0.612634	NEUTRAL	FAM160A1	0.127445	0.470864	1.88543	0.99965	UP
hsa-miR-4488	3253.35	2433.74	0.748074	-0.418748	0.612634	NEUTRAL	FAM160A1	0.127445	0.470864	1.88543	0.99965	UP
hsa-miR-4488	3253.35	2433.74	0.748074	-0.418748	0.612634	NEUTRAL	FAM160A1	0.127445	0.470864	1.88543	0.99965	UP
hsa-miR-532-3p	1.16775	20.5524	17.6	4.1375	0.0150138	UP	BCL2	0.175622	0.648841	1.88539	0.99965	UP
hsa-miR-532-3p	1.16775	20.5524	17.6	4.1375	0.0150138	UP	BCL2	0.175622	0.648841	1.88539	0.99965	UP
hsa-miR-532-3p	1.16775	20.5524	17.6	4.1375	0.0150138	UP	BCL2	0.175622	0.648841	1.88539	0.99965	UP
hsa-miR-1469	1.16775	8.56349	7.33333	2.87447	0.128943	UP	BCL2	0.175622	0.648841	1.88539	0.99965	UP
hsa-miR-1469	1.16775	8.56349	7.33333	2.87447	0.128943	UP	BCL2	0.175622	0.648841	1.88539	0.99965	UP
hsa-miR-1469	1.16775	8.56349	7.33333	2.87447	0.128943	UP	BCL2	0.175622	0.648841	1.88539	0.99965	UP
hsa-miR-4466	12.8452	21.4087	1.66667	0.736966	0.567146	NEUTRAL	BCL2	0.175622	0.648841	1.88539	0.99965	UP
hsa-miR-4466	12.8452	21.4087	1.66667	0.736966	0.567146	NEUTRAL	BCL2	0.175622	0.648841	1.88539	0.99965	UP
hsa-miR-4466	12.8452	21.4087	1.66667	0.736966	0.567146	NEUTRAL	BCL2	0.175622	0.648841	1.88539	0.99965	UP
hsa-miR-1268b	72.4004	113.038	1.56129	0.642739	0.51546	NEUTRAL	BCL2	0.175622	0.648841	1.88539	0.99965	UP
hsa-miR-1268b	72.4004	113.038	1.56129	0.642739	0.51546	NEUTRAL	BCL2	0.175622	0.648841	1.88539	0.99965	UP
hsa-miR-1268b	72.4004	113.038	1.56129	0.642739	0.51546	NEUTRAL	BCL2	0.175622	0.648841	1.88539	0.99965	UP
hsa-miR-24-3p	1626.67	966.818	0.594353	-0.750609	0.364889	NEUTRAL	BCL2	0.175622	0.648841	1.88539	0.99965	UP
hsa-miR-24-3p	1626.67	966.818	0.594353	-0.750609	0.364889	NEUTRAL	BCL2	0.175622	0.648841	1.88539	0.99965	UP
hsa-miR-3960	12.8452	3.4254	0.266667	-1.90689	0.182003	DOWN	BCL2	0.175622	0.648841	1.88539	0.99965	UP
hsa-miR-1469	1.16775	8.56349	7.33333	2.87447	0.128943	UP	COMP	17.3252	63.9492	1.88406	0.0363525	UP
hsa-miR-1469	1.16775	8.56349	7.33333	2.87447	0.128943	UP	COMP	17.3252	63.9492	1.88406	0.0363525	UP
hsa-miR-1469	1.16775	8.56349	7.33333	2.87447	0.128943	UP	COMP	17.3252	63.9492	1.88406	0.0363525	UP
hsa-miR-7706	54.8842	113.038	2.05957	1.04235	0.295195	UP	COMP	17.3252	63.9492	1.88406	0.0363525	UP
hsa-miR-7706	54.8842	113.038	2.05957	1.04235	0.295195	UP	COMP	17.3252	63.9492	1.88406	0.0363525	UP
hsa-miR-7706	54.8842	113.038	2.05957	1.04235	0.295195	UP	COMP	17.3252	63.9492	1.88406	0.0363525	UP
hsa-miR-744-5p	850.121	678.228	0.797802	-0.325897	0.696683	NEUTRAL	COMP	17.3252	63.9492	1.88406	0.0363525	UP
hsa-miR-744-5p	850.121	678.228	0.797802	-0.325897	0.696683	NEUTRAL	COMP	17.3252	63.9492	1.88406	0.0363525	UP
hsa-miR-744-5p	850.121	678.228	0.797802	-0.325897	0.696683	NEUTRAL	COMP	17.3252	63.9492	1.88406	0.0363525	UP
hsa-miR-27b-3p	140632	111155	0.790396	-0.339352	0.759	NEUTRAL	CYP1B1	67.733	246.783	1.86531	0.442374	UP
hsa-miR-4508	179.833	108.756	0.604762	-0.725561	0.439635	NEUTRAL	CYP1B1	67.733	246.783	1.86531	0.442374	UP
hsa-miR-4508	179.833	108.756	0.604762	-0.725561	0.439635	NEUTRAL	CYP1B1	67.733	246.783	1.86531	0.442374	UP
hsa-miR-4508	179.833	108.756	0.604762	-0.725561	0.439635	NEUTRAL	CYP1B1	67.733	246.783	1.86531	0.442374	UP
hsa-miR-6852-5p	15.1807	12.8452	0.846154	-0.241008	0.903482	NEUTRAL	SLC9A9	0.33165	1.18306	1.83479	0.99965	UP
hsa-miR-296-5p	16.3485	24.8341	1.51905	0.603167	0.631192	NEUTRAL	PKMYT1	0.165168	0.587752	1.83127	0.99965	UP
hsa-miR-671-5p	58.3874	71.077	1.21733	0.283724	0.792222	NEUTRAL	PKMYT1	0.165168	0.587752	1.83127	0.99965	UP
hsa-miR-671-5p	58.3874	71.077	1.21733	0.283724	0.792222	NEUTRAL	PKMYT1	0.165168	0.587752	1.83127	0.99965	UP
hsa-miR-671-5p	58.3874	71.077	1.21733	0.283724	0.792222	NEUTRAL	PKMYT1	0.165168	0.587752	1.83127	0.99965	UP
hsa-miR-671-5p	58.3874	71.077	1.21733	0.283724	0.792222	NEUTRAL	PKMYT1	0.165168	0.587752	1.83127	0.99965	UP
hsa-miR-671-5p	58.3874	71.077	1.21733	0.283724	0.792222	NEUTRAL	PKMYT1	0.165168	0.587752	1.83127	0.99965	UP
hsa-miR-671-5p	58.3874	71.077	1.21733	0.283724	0.792222	NEUTRAL	PKMYT1	0.165168	0.587752	1.83127	0.99965	UP
hsa-miR-671-5p	58.3874	71.077	1.21733	0.283724	0.792222	NEUTRAL	PKMYT1	0.165168	0.587752	1.83127	0.99965	UP
hsa-miR-671-5p	58.3874	71.077	1.21733	0.283724	0.792222	NEUTRAL	PKMYT1	0.165168	0.587752	1.83127	0.99965	UP
hsa-miR-671-5p	58.3874	71.077	1.21733	0.283724	0.792222	NEUTRAL	PKMYT1	0.165168	0.587752	1.83127	0.99965	UP
hsa-miR-1469	1.16775	8.56349	7.33333	2.87447	0.128943	UP	POU3F3	0.202652	0.720616	1.83022	0.99965	UP
hsa-miR-4516	15.1807	63.3698	4.17436	2.06155	0.0638169	UP	POU3F3	0.202652	0.720616	1.83022	0.99965	UP
hsa-miR-6842-3p	3.50325	8.56349	2.44444	1.28951	0.444061	UP	POU3F3	0.202652	0.720616	1.83022	0.99965	UP
hsa-miR-4466	12.8452	21.4087	1.66667	0.736966	0.567146	NEUTRAL	POU3F3	0.202652	0.720616	1.83022	0.99965	UP
hsa-miR-431-3p	68.8972	49.6682	0.720904	-0.472121	0.650903	NEUTRAL	POU3F3	0.202652	0.720616	1.83022	0.99965	UP
hsa-miR-3960	12.8452	3.4254	0.266667	-1.90689	0.182003	DOWN	POU3F3	0.202652	0.720616	1.83022	0.99965	UP
hsa-miR-3605-3p	29.1937	54.8063	1.87733	0.908685	0.398783	NEUTRAL	FSTL3	19.6404	69.7853	1.8291	0.0253622	UP
hsa-miR-665	35.0325	53.95	1.54	0.62293	0.564592	NEUTRAL	GDAP1L1	0.119356	0.422878	1.82497	0.99965	UP
hsa-miR-665	35.0325	53.95	1.54	0.62293	0.564592	NEUTRAL	GDAP1L1	0.119356	0.422878	1.82497	0.99965	UP
hsa-miR-665	35.0325	53.95	1.54	0.62293	0.564592	NEUTRAL	GDAP1L1	0.119356	0.422878	1.82497	0.99965	UP
hsa-miR-665	35.0325	53.95	1.54	0.62293	0.564592	NEUTRAL	GDAP1L1	0.119356	0.422878	1.82497	0.99965	UP
hsa-miR-665	35.0325	53.95	1.54	0.62293	0.564592	NEUTRAL	GDAP1L1	0.119356	0.422878	1.82497	0.99965	UP
hsa-miR-665	35.0325	53.95	1.54	0.62293	0.564592	NEUTRAL	GDAP1L1	0.119356	0.422878	1.82497	0.99965	UP
hsa-miR-345-5p	463.596	673.09	1.45189	0.537931	0.526699	NEUTRAL	GDAP1L1	0.119356	0.422878	1.82497	0.99965	UP
hsa-miR-484	1332.4	1514.02	1.13631	0.184361	0.824672	NEUTRAL	GDAP1L1	0.119356	0.422878	1.82497	0.99965	UP
hsa-miR-484	1332.4	1514.02	1.13631	0.184361	0.824672	NEUTRAL	GDAP1L1	0.119356	0.422878	1.82497	0.99965	UP
hsa-miR-484	1332.4	1514.02	1.13631	0.184361	0.824672	NEUTRAL	GDAP1L1	0.119356	0.422878	1.82497	0.99965	UP
hsa-miR-484	1332.4	1514.02	1.13631	0.184361	0.824672	NEUTRAL	GDAP1L1	0.119356	0.422878	1.82497	0.99965	UP
hsa-miR-484	1332.4	1514.02	1.13631	0.184361	0.824672	NEUTRAL	GDAP1L1	0.119356	0.422878	1.82497	0.99965	UP
hsa-miR-484	1332.4	1514.02	1.13631	0.184361	0.824672	NEUTRAL	GDAP1L1	0.119356	0.422878	1.82497	0.99965	UP
hsa-miR-484	1332.4	1514.02	1.13631	0.184361	0.824672	NEUTRAL	GDAP1L1	0.119356	0.422878	1.82497	0.99965	UP
hsa-miR-484	1332.4	1514.02	1.13631	0.184361	0.824672	NEUTRAL	GDAP1L1	0.119356	0.422878	1.82497	0.99965	UP
hsa-miR-5787	12.8452	12.8452	1	0	1	NEUTRAL	GDAP1L1	0.119356	0.422878	1.82497	0.99965	UP
hsa-miR-92a-1-5p	10.5097	10.2762	0.977778	-0.0324215	1	NEUTRAL	GDAP1L1	0.119356	0.422878	1.82497	0.99965	UP
hsa-miR-92a-1-5p	10.5097	10.2762	0.977778	-0.0324215	1	NEUTRAL	GDAP1L1	0.119356	0.422878	1.82497	0.99965	UP
hsa-miR-92a-1-5p	10.5097	10.2762	0.977778	-0.0324215	1	NEUTRAL	GDAP1L1	0.119356	0.422878	1.82497	0.99965	UP
hsa-miR-92a-1-5p	10.5097	10.2762	0.977778	-0.0324215	1	NEUTRAL	GDAP1L1	0.119356	0.422878	1.82497	0.99965	UP
hsa-miR-92a-1-5p	10.5097	10.2762	0.977778	-0.0324215	1	NEUTRAL	GDAP1L1	0.119356	0.422878	1.82497	0.99965	UP
hsa-miR-92a-1-5p	10.5097	10.2762	0.977778	-0.0324215	1	NEUTRAL	GDAP1L1	0.119356	0.422878	1.82497	0.99965	UP
hsa-miR-92a-1-5p	10.5097	10.2762	0.977778	-0.0324215	1	NEUTRAL	GDAP1L1	0.119356	0.422878	1.82497	0.99965	UP
hsa-miR-1228-3p	5.83874	10.2762	1.76	0.815575	0.615942	NEUTRAL	FAM20A	2.70423	9.5582	1.82152	0.99965	UP
hsa-miR-4466	12.8452	21.4087	1.66667	0.736966	0.567146	NEUTRAL	FAM20A	2.70423	9.5582	1.82152	0.99965	UP
hsa-miR-212-5p	16.3485	24.8341	1.51905	0.603167	0.631192	NEUTRAL	FAM20A	2.70423	9.5582	1.82152	0.99965	UP
hsa-miR-212-5p	16.3485	24.8341	1.51905	0.603167	0.631192	NEUTRAL	FAM20A	2.70423	9.5582	1.82152	0.99965	UP
hsa-miR-3615	81.7424	93.342	1.1419	0.191442	0.856957	NEUTRAL	FAM20A	2.70423	9.5582	1.82152	0.99965	UP
hsa-miR-3909	429.731	447.014	1.04022	0.0568851	0.95088	NEUTRAL	FAM20A	2.70423	9.5582	1.82152	0.99965	UP
hsa-miR-4532	44613.8	18135.8	0.406505	-1.29865	0.174811	DOWN	FAM20A	2.70423	9.5582	1.82152	0.99965	UP
hsa-miR-3677-3p	7.00649	22.2651	3.17778	1.66802	0.197722	UP	TCEAL4	36.9673	130.605	1.82089	0.0411538	UP
hsa-miR-3677-3p	7.00649	22.2651	3.17778	1.66802	0.197722	UP	TCEAL4	36.9673	130.605	1.82089	0.0411538	UP
hsa-miR-3677-3p	7.00649	22.2651	3.17778	1.66802	0.197722	UP	TCEAL4	36.9673	130.605	1.82089	0.0411538	UP
hsa-miR-3677-3p	7.00649	22.2651	3.17778	1.66802	0.197722	UP	TCEAL4	36.9673	130.605	1.82089	0.0411538	UP
hsa-miR-3677-3p	7.00649	22.2651	3.17778	1.66802	0.197722	UP	TCEAL4	36.9673	130.605	1.82089	0.0411538	UP
hsa-miR-3677-3p	7.00649	22.2651	3.17778	1.66802	0.197722	UP	TCEAL4	36.9673	130.605	1.82089	0.0411538	UP
hsa-miR-3677-3p	7.00649	22.2651	3.17778	1.66802	0.197722	UP	TCEAL4	36.9673	130.605	1.82089	0.0411538	UP
hsa-miR-149-5p	416.886	306.573	0.735387	-0.443423	0.61018	NEUTRAL	TCEAL4	36.9673	130.605	1.82089	0.0411538	UP
hsa-miR-149-5p	416.886	306.573	0.735387	-0.443423	0.61018	NEUTRAL	TCEAL4	36.9673	130.605	1.82089	0.0411538	UP
hsa-miR-149-5p	416.886	306.573	0.735387	-0.443423	0.61018	NEUTRAL	TCEAL4	36.9673	130.605	1.82089	0.0411538	UP
hsa-miR-149-5p	416.886	306.573	0.735387	-0.443423	0.61018	NEUTRAL	TCEAL4	36.9673	130.605	1.82089	0.0411538	UP
hsa-miR-149-5p	416.886	306.573	0.735387	-0.443423	0.61018	NEUTRAL	TCEAL4	36.9673	130.605	1.82089	0.0411538	UP
hsa-miR-149-5p	416.886	306.573	0.735387	-0.443423	0.61018	NEUTRAL	TCEAL4	36.9673	130.605	1.82089	0.0411538	UP
hsa-miR-149-5p	416.886	306.573	0.735387	-0.443423	0.61018	NEUTRAL	TCEAL4	36.9673	130.605	1.82089	0.0411538	UP
hsa-miR-149-5p	416.886	306.573	0.735387	-0.443423	0.61018	NEUTRAL	TCEAL4	36.9673	130.605	1.82089	0.0411538	UP
hsa-miR-331-3p	391.196	240.634	0.615124	-0.70105	0.42477	NEUTRAL	TCEAL4	36.9673	130.605	1.82089	0.0411538	UP
hsa-miR-766-3p	12.8452	10.2762	0.8	-0.321928	0.865138	NEUTRAL	MMP19	2.41098	8.50087	1.81799	0.99965	UP
hsa-miR-6716-3p	12.8452	8.56349	0.666667	-0.584963	0.701258	NEUTRAL	MMP19	2.41098	8.50087	1.81799	0.99965	UP
hsa-miR-6716-3p	12.8452	8.56349	0.666667	-0.584963	0.701258	NEUTRAL	MMP19	2.41098	8.50087	1.81799	0.99965	UP
hsa-miR-146b-3p	18.684	72.7897	3.89583	1.96193	0.0710823	UP	MAP2	0.33337	1.16892	1.80998	0.705113	UP
hsa-miR-146b-3p	18.684	72.7897	3.89583	1.96193	0.0710823	UP	MAP2	0.33337	1.16892	1.80998	0.705113	UP
hsa-miR-146b-3p	18.684	72.7897	3.89583	1.96193	0.0710823	UP	MAP2	0.33337	1.16892	1.80998	0.705113	UP
hsa-miR-146b-3p	18.684	72.7897	3.89583	1.96193	0.0710823	UP	MAP2	0.33337	1.16892	1.80998	0.705113	UP
hsa-miR-146b-3p	18.684	72.7897	3.89583	1.96193	0.0710823	UP	MAP2	0.33337	1.16892	1.80998	0.705113	UP
hsa-miR-146b-3p	18.684	72.7897	3.89583	1.96193	0.0710823	UP	MAP2	0.33337	1.16892	1.80998	0.705113	UP
hsa-miR-146b-3p	18.684	72.7897	3.89583	1.96193	0.0710823	UP	MAP2	0.33337	1.16892	1.80998	0.705113	UP
hsa-miR-23a-5p	110.936	95.0547	0.856842	-0.222899	0.824966	NEUTRAL	MAP2	0.33337	1.16892	1.80998	0.705113	UP
hsa-miR-23a-5p	110.936	95.0547	0.856842	-0.222899	0.824966	NEUTRAL	MAP2	0.33337	1.16892	1.80998	0.705113	UP
hsa-miR-23a-5p	110.936	95.0547	0.856842	-0.222899	0.824966	NEUTRAL	MAP2	0.33337	1.16892	1.80998	0.705113	UP
hsa-miR-23a-5p	110.936	95.0547	0.856842	-0.222899	0.824966	NEUTRAL	MAP2	0.33337	1.16892	1.80998	0.705113	UP
hsa-miR-23a-5p	110.936	95.0547	0.856842	-0.222899	0.824966	NEUTRAL	MAP2	0.33337	1.16892	1.80998	0.705113	UP
hsa-miR-23a-5p	110.936	95.0547	0.856842	-0.222899	0.824966	NEUTRAL	MAP2	0.33337	1.16892	1.80998	0.705113	UP
hsa-miR-23a-5p	110.936	95.0547	0.856842	-0.222899	0.824966	NEUTRAL	MAP2	0.33337	1.16892	1.80998	0.705113	UP
hsa-miR-23a-5p	110.936	95.0547	0.856842	-0.222899	0.824966	NEUTRAL	MAP2	0.33337	1.16892	1.80998	0.705113	UP
hsa-miR-23a-5p	110.936	95.0547	0.856842	-0.222899	0.824966	NEUTRAL	MAP2	0.33337	1.16892	1.80998	0.705113	UP
hsa-miR-23a-5p	110.936	95.0547	0.856842	-0.222899	0.824966	NEUTRAL	MAP2	0.33337	1.16892	1.80998	0.705113	UP
hsa-miR-2277-5p	36.2002	58.2317	1.6086	0.685808	0.520897	NEUTRAL	FRY	0.522458	1.81873	1.79954	0.943643	UP
hsa-miR-2277-5p	36.2002	58.2317	1.6086	0.685808	0.520897	NEUTRAL	FRY	0.522458	1.81873	1.79954	0.943643	UP
hsa-miR-2277-5p	36.2002	58.2317	1.6086	0.685808	0.520897	NEUTRAL	FRY	0.522458	1.81873	1.79954	0.943643	UP
hsa-miR-1306-5p	10.5097	8.56349	0.814815	-0.295456	0.902973	NEUTRAL	FRY	0.522458	1.81873	1.79954	0.943643	UP
hsa-miR-1303	1.16775	8.56349	7.33333	2.87447	0.128943	UP	TLCD2	0.625907	2.15691	1.78494	0.777044	UP
hsa-miR-1303	1.16775	8.56349	7.33333	2.87447	0.128943	UP	TLCD2	0.625907	2.15691	1.78494	0.777044	UP
hsa-miR-1285-3p	119.11	183.259	1.53856	0.621583	0.508504	NEUTRAL	TLCD2	0.625907	2.15691	1.78494	0.777044	UP
hsa-miR-1285-3p	119.11	183.259	1.53856	0.621583	0.508504	NEUTRAL	TLCD2	0.625907	2.15691	1.78494	0.777044	UP
hsa-miR-877-5p	19.8517	9.41984	0.47451	-1.07549	0.396051	DOWN	WISP1	3.0162	10.388	1.78411	0.177241	UP
hsa-miR-1469	1.16775	8.56349	7.33333	2.87447	0.128943	UP	TWIST1	7.11211	24.4168	1.77952	0.491771	UP
hsa-miR-1307-3p	231.214	429.887	1.85926	0.894728	0.309031	NEUTRAL	TWIST1	7.11211	24.4168	1.77952	0.491771	UP
hsa-miR-874-3p	168.156	259.474	1.54306	0.62579	0.491682	NEUTRAL	TWIST1	7.11211	24.4168	1.77952	0.491771	UP
hsa-miR-665	35.0325	53.95	1.54	0.62293	0.564592	NEUTRAL	ASS1	21.0415	72.1242	1.77725	0.0411538	UP
hsa-miR-665	35.0325	53.95	1.54	0.62293	0.564592	NEUTRAL	ASS1	21.0415	72.1242	1.77725	0.0411538	UP
hsa-miR-665	35.0325	53.95	1.54	0.62293	0.564592	NEUTRAL	ASS1	21.0415	72.1242	1.77725	0.0411538	UP
hsa-miR-665	35.0325	53.95	1.54	0.62293	0.564592	NEUTRAL	ASS1	21.0415	72.1242	1.77725	0.0411538	UP
hsa-miR-665	35.0325	53.95	1.54	0.62293	0.564592	NEUTRAL	ASS1	21.0415	72.1242	1.77725	0.0411538	UP
hsa-miR-5787	12.8452	12.8452	1	0	1	NEUTRAL	ASS1	21.0415	72.1242	1.77725	0.0411538	UP
hsa-miR-1469	1.16775	8.56349	7.33333	2.87447	0.128943	UP	PDE3A	0.347372	1.17664	1.76011	0.95786	UP
hsa-miR-5787	12.8452	12.8452	1	0	1	NEUTRAL	PDE3A	0.347372	1.17664	1.76011	0.95786	UP
hsa-miR-328-3p	142.465	68.5079	0.480874	-1.05627	0.275341	DOWN	PDE3A	0.347372	1.17664	1.76011	0.95786	UP
hsa-miR-3074-5p	31.5292	27.4032	0.869136	-0.202346	0.883564	NEUTRAL	ITGA10	4.87322	16.439	1.75418	0.25403	UP
hsa-miR-3074-5p	31.5292	27.4032	0.869136	-0.202346	0.883564	NEUTRAL	ITGA10	4.87322	16.439	1.75418	0.25403	UP
hsa-miR-3176	14.013	26.5468	1.89444	0.921775	0.44803	NEUTRAL	TBXAS1	1.08487	3.65584	1.75269	0.99965	UP
hsa-miR-1285-3p	119.11	183.259	1.53856	0.621583	0.508504	NEUTRAL	TBXAS1	1.08487	3.65584	1.75269	0.99965	UP
hsa-miR-145-5p	4139.67	9074.73	2.19214	1.13234	0.187488	UP	WWOX	1.50851	5.06255	1.74675	0.99965	UP
hsa-miR-145-5p	4139.67	9074.73	2.19214	1.13234	0.187488	UP	WWOX	1.50851	5.06255	1.74675	0.99965	UP
hsa-miR-145-5p	4139.67	9074.73	2.19214	1.13234	0.187488	UP	WWOX	1.50851	5.06255	1.74675	0.99965	UP
hsa-miR-145-5p	4139.67	9074.73	2.19214	1.13234	0.187488	UP	WWOX	1.50851	5.06255	1.74675	0.99965	UP
hsa-miR-145-5p	4139.67	9074.73	2.19214	1.13234	0.187488	UP	WWOX	1.50851	5.06255	1.74675	0.99965	UP
hsa-miR-15a-5p	1256.5	1160.35	0.923482	-0.114844	0.88952	NEUTRAL	WWOX	1.50851	5.06255	1.74675	0.99965	UP
hsa-miR-15a-5p	1256.5	1160.35	0.923482	-0.114844	0.88952	NEUTRAL	WWOX	1.50851	5.06255	1.74675	0.99965	UP
hsa-miR-15a-5p	1256.5	1160.35	0.923482	-0.114844	0.88952	NEUTRAL	WWOX	1.50851	5.06255	1.74675	0.99965	UP
hsa-miR-15a-5p	1256.5	1160.35	0.923482	-0.114844	0.88952	NEUTRAL	WWOX	1.50851	5.06255	1.74675	0.99965	UP
hsa-miR-15a-5p	1256.5	1160.35	0.923482	-0.114844	0.88952	NEUTRAL	WWOX	1.50851	5.06255	1.74675	0.99965	UP
hsa-miR-15a-5p	1256.5	1160.35	0.923482	-0.114844	0.88952	NEUTRAL	WWOX	1.50851	5.06255	1.74675	0.99965	UP
hsa-miR-1301-3p	18.684	19.696	1.05417	0.076103	1	NEUTRAL	LRRC32	3.94079	13.2033	1.74434	0.179076	UP
hsa-miR-1301-3p	18.684	19.696	1.05417	0.076103	1	NEUTRAL	LRRC32	3.94079	13.2033	1.74434	0.179076	UP
hsa-miR-125a-3p	106.265	107.044	1.00733	0.0105307	1	NEUTRAL	LRRC32	3.94079	13.2033	1.74434	0.179076	UP
hsa-miR-125a-3p	106.265	107.044	1.00733	0.0105307	1	NEUTRAL	LRRC32	3.94079	13.2033	1.74434	0.179076	UP
hsa-miR-125a-3p	106.265	107.044	1.00733	0.0105307	1	NEUTRAL	LRRC32	3.94079	13.2033	1.74434	0.179076	UP
hsa-miR-4516	15.1807	63.3698	4.17436	2.06155	0.0638169	UP	GJD3	0.470049	1.55924	1.72996	0.99965	UP
hsa-miR-2277-5p	36.2002	58.2317	1.6086	0.685808	0.520897	NEUTRAL	GJD3	0.470049	1.55924	1.72996	0.99965	UP
hsa-miR-1285-3p	119.11	183.259	1.53856	0.621583	0.508504	NEUTRAL	EMILIN2	1.07878	3.56849	1.72591	0.99965	UP
hsa-miR-5787	12.8452	12.8452	1	0	1	NEUTRAL	EMILIN2	1.07878	3.56849	1.72591	0.99965	UP
hsa-miR-5787	12.8452	12.8452	1	0	1	NEUTRAL	EMILIN2	1.07878	3.56849	1.72591	0.99965	UP
hsa-miR-3074-5p	31.5292	27.4032	0.869136	-0.202346	0.883564	NEUTRAL	KLHL10	0.166587	0.542059	1.70217	0.99965	UP
hsa-miR-1260b	15.1807	8.56349	0.564103	-0.825971	0.546679	NEUTRAL	KLHL10	0.166587	0.542059	1.70217	0.99965	UP
hsa-miR-6842-3p	3.50325	8.56349	2.44444	1.28951	0.444061	UP	CRYAB	79.878	259.787	1.70146	0.144584	UP
hsa-miR-6842-3p	3.50325	8.56349	2.44444	1.28951	0.444061	UP	CRYAB	79.878	259.787	1.70146	0.144584	UP
hsa-miR-6842-3p	3.50325	8.56349	2.44444	1.28951	0.444061	UP	CRYAB	79.878	259.787	1.70146	0.144584	UP
hsa-miR-6842-3p	3.50325	8.56349	2.44444	1.28951	0.444061	UP	CRYAB	79.878	259.787	1.70146	0.144584	UP
hsa-miR-6842-3p	3.50325	8.56349	2.44444	1.28951	0.444061	UP	CRYAB	79.878	259.787	1.70146	0.144584	UP
hsa-miR-6842-3p	3.50325	8.56349	2.44444	1.28951	0.444061	UP	CRYAB	79.878	259.787	1.70146	0.144584	UP
hsa-miR-6842-3p	3.50325	8.56349	2.44444	1.28951	0.444061	UP	CRYAB	79.878	259.787	1.70146	0.144584	UP
hsa-miR-6842-3p	3.50325	8.56349	2.44444	1.28951	0.444061	UP	CRYAB	79.878	259.787	1.70146	0.144584	UP
hsa-miR-6842-3p	3.50325	8.56349	2.44444	1.28951	0.444061	UP	CRYAB	79.878	259.787	1.70146	0.144584	UP
hsa-miR-6842-3p	3.50325	8.56349	2.44444	1.28951	0.444061	UP	CRYAB	79.878	259.787	1.70146	0.144584	UP
hsa-miR-6842-3p	3.50325	8.56349	2.44444	1.28951	0.444061	UP	CRYAB	79.878	259.787	1.70146	0.144584	UP
hsa-miR-5787	12.8452	12.8452	1	0	1	NEUTRAL	CRYAB	79.878	259.787	1.70146	0.144584	UP
hsa-miR-1285-3p	119.11	183.259	1.53856	0.621583	0.508504	NEUTRAL	OOEP	0.152611	0.494962	1.69746	0.99965	UP
hsa-miR-1285-3p	119.11	183.259	1.53856	0.621583	0.508504	NEUTRAL	OOEP	0.152611	0.494962	1.69746	0.99965	UP
hsa-miR-1469	1.16775	8.56349	7.33333	2.87447	0.128943	UP	RPL36P4	0.554188	1.79529	1.69577	0.99965	UP
hsa-miR-146b-3p	18.684	72.7897	3.89583	1.96193	0.0710823	UP	TTYH2	0.418161	1.35011	1.69095	0.99965	UP
hsa-miR-146b-3p	18.684	72.7897	3.89583	1.96193	0.0710823	UP	TTYH2	0.418161	1.35011	1.69095	0.99965	UP
hsa-miR-874-5p	15.1807	30.8286	2.03077	1.02203	0.386358	UP	TTYH2	0.418161	1.35011	1.69095	0.99965	UP
hsa-miR-665	35.0325	53.95	1.54	0.62293	0.564592	NEUTRAL	CH507-42P11.8	0.297853	0.959153	1.68716	0.99965	UP
hsa-miR-484	1332.4	1514.02	1.13631	0.184361	0.824672	NEUTRAL	CH507-42P11.8	0.297853	0.959153	1.68716	0.99965	UP
hsa-miR-5787	12.8452	12.8452	1	0	1	NEUTRAL	CH507-42P11.8	0.297853	0.959153	1.68716	0.99965	UP
hsa-miR-766-3p	12.8452	10.2762	0.8	-0.321928	0.865138	NEUTRAL	CH507-42P11.8	0.297853	0.959153	1.68716	0.99965	UP
hsa-miR-1197	31.5292	69.3643	2.2	1.1375	0.279519	UP	ITIH3	0.207751	0.667203	1.68327	0.99965	UP
hsa-miR-134-3p	8.17424	11.1325	1.3619	0.445626	0.8105	NEUTRAL	ITIH3	0.207751	0.667203	1.68327	0.99965	UP
hsa-miR-671-5p	58.3874	71.077	1.21733	0.283724	0.792222	NEUTRAL	ITIH3	0.207751	0.667203	1.68327	0.99965	UP
hsa-miR-532-3p	1.16775	20.5524	17.6	4.1375	0.0150138	UP	CD74	0.590831	1.89523	1.68155	0.99965	UP
hsa-miR-370-3p	175.162	376.793	2.15111	1.10508	0.216401	UP	CD74	0.590831	1.89523	1.68155	0.99965	UP
hsa-miR-3909	429.731	447.014	1.04022	0.0568851	0.95088	NEUTRAL	PTGFR	1.47414	4.65211	1.65801	0.507599	UP
hsa-miR-2277-5p	36.2002	58.2317	1.6086	0.685808	0.520897	NEUTRAL	KBTBD11	0.400278	1.26298	1.65775	0.891341	UP
hsa-miR-2277-5p	36.2002	58.2317	1.6086	0.685808	0.520897	NEUTRAL	KBTBD11	0.400278	1.26298	1.65775	0.891341	UP
hsa-miR-484	1332.4	1514.02	1.13631	0.184361	0.824672	NEUTRAL	KBTBD11	0.400278	1.26298	1.65775	0.891341	UP
hsa-miR-484	1332.4	1514.02	1.13631	0.184361	0.824672	NEUTRAL	KBTBD11	0.400278	1.26298	1.65775	0.891341	UP
hsa-miR-877-5p	19.8517	9.41984	0.47451	-1.07549	0.396051	DOWN	KBTBD11	0.400278	1.26298	1.65775	0.891341	UP
hsa-miR-877-5p	19.8517	9.41984	0.47451	-1.07549	0.396051	DOWN	KBTBD11	0.400278	1.26298	1.65775	0.891341	UP
hsa-miR-181a-2-3p	3163.43	3456.22	1.09256	0.127707	0.878895	NEUTRAL	PTGER4	0.717935	2.26421	1.65708	0.946097	UP
hsa-miR-1303	1.16775	8.56349	7.33333	2.87447	0.128943	UP	CATSPER2	0.445796	1.40577	1.65691	0.99965	UP
hsa-miR-615-3p	228.879	602.013	2.63027	1.39521	0.110374	UP	CATSPER2	0.445796	1.40577	1.65691	0.99965	UP
hsa-miR-615-3p	228.879	602.013	2.63027	1.39521	0.110374	UP	CATSPER2	0.445796	1.40577	1.65691	0.99965	UP
hsa-miR-615-3p	228.879	602.013	2.63027	1.39521	0.110374	UP	CATSPER2	0.445796	1.40577	1.65691	0.99965	UP
hsa-miR-615-3p	228.879	602.013	2.63027	1.39521	0.110374	UP	CATSPER2	0.445796	1.40577	1.65691	0.99965	UP
hsa-miR-143-5p	290.769	466.71	1.60509	0.682652	0.432676	NEUTRAL	CATSPER2	0.445796	1.40577	1.65691	0.99965	UP
hsa-miR-665	35.0325	53.95	1.54	0.62293	0.564592	NEUTRAL	CD82	18.6049	58.5078	1.65294	0.261508	UP
hsa-miR-665	35.0325	53.95	1.54	0.62293	0.564592	NEUTRAL	CD82	18.6049	58.5078	1.65294	0.261508	UP
hsa-miR-665	35.0325	53.95	1.54	0.62293	0.564592	NEUTRAL	CD82	18.6049	58.5078	1.65294	0.261508	UP
hsa-miR-665	35.0325	53.95	1.54	0.62293	0.564592	NEUTRAL	CD82	18.6049	58.5078	1.65294	0.261508	UP
hsa-miR-296-5p	16.3485	24.8341	1.51905	0.603167	0.631192	NEUTRAL	CD82	18.6049	58.5078	1.65294	0.261508	UP
hsa-miR-296-5p	16.3485	24.8341	1.51905	0.603167	0.631192	NEUTRAL	CD82	18.6049	58.5078	1.65294	0.261508	UP
hsa-miR-296-5p	16.3485	24.8341	1.51905	0.603167	0.631192	NEUTRAL	CD82	18.6049	58.5078	1.65294	0.261508	UP
hsa-miR-296-5p	16.3485	24.8341	1.51905	0.603167	0.631192	NEUTRAL	CD82	18.6049	58.5078	1.65294	0.261508	UP
hsa-miR-296-5p	16.3485	24.8341	1.51905	0.603167	0.631192	NEUTRAL	CD82	18.6049	58.5078	1.65294	0.261508	UP
hsa-miR-296-5p	16.3485	24.8341	1.51905	0.603167	0.631192	NEUTRAL	CD82	18.6049	58.5078	1.65294	0.261508	UP
hsa-miR-296-5p	16.3485	24.8341	1.51905	0.603167	0.631192	NEUTRAL	CD82	18.6049	58.5078	1.65294	0.261508	UP
hsa-miR-5787	12.8452	12.8452	1	0	1	NEUTRAL	CD82	18.6049	58.5078	1.65294	0.261508	UP
hsa-miR-668-3p	51.3809	24.8341	0.483333	-1.04891	0.329782	DOWN	CD82	18.6049	58.5078	1.65294	0.261508	UP
hsa-miR-668-3p	51.3809	24.8341	0.483333	-1.04891	0.329782	DOWN	CD82	18.6049	58.5078	1.65294	0.261508	UP
hsa-miR-1469	1.16775	8.56349	7.33333	2.87447	0.128943	UP	PLXND1	32.8238	103.107	1.65133	0.419123	UP
hsa-miR-6824-3p	2.3355	12.8452	5.5	2.45943	0.118936	UP	PLXND1	32.8238	103.107	1.65133	0.419123	UP
hsa-miR-6824-3p	2.3355	12.8452	5.5	2.45943	0.118936	UP	PLXND1	32.8238	103.107	1.65133	0.419123	UP
hsa-miR-6824-3p	2.3355	12.8452	5.5	2.45943	0.118936	UP	PLXND1	32.8238	103.107	1.65133	0.419123	UP
hsa-miR-6824-3p	2.3355	12.8452	5.5	2.45943	0.118936	UP	PLXND1	32.8238	103.107	1.65133	0.419123	UP
hsa-miR-887-5p	7.00649	28.2595	4.03333	2.01197	0.110699	UP	PLXND1	32.8238	103.107	1.65133	0.419123	UP
hsa-miR-887-5p	7.00649	28.2595	4.03333	2.01197	0.110699	UP	PLXND1	32.8238	103.107	1.65133	0.419123	UP
hsa-miR-1307-3p	231.214	429.887	1.85926	0.894728	0.309031	NEUTRAL	PLXND1	32.8238	103.107	1.65133	0.419123	UP
hsa-miR-2277-5p	36.2002	58.2317	1.6086	0.685808	0.520897	NEUTRAL	PLXND1	32.8238	103.107	1.65133	0.419123	UP
hsa-miR-5787	12.8452	12.8452	1	0	1	NEUTRAL	PLXND1	32.8238	103.107	1.65133	0.419123	UP
hsa-miR-5787	12.8452	12.8452	1	0	1	NEUTRAL	PLXND1	32.8238	103.107	1.65133	0.419123	UP
hsa-miR-5787	12.8452	12.8452	1	0	1	NEUTRAL	PLXND1	32.8238	103.107	1.65133	0.419123	UP
hsa-miR-5787	12.8452	12.8452	1	0	1	NEUTRAL	PLXND1	32.8238	103.107	1.65133	0.419123	UP
hsa-miR-6852-5p	15.1807	12.8452	0.846154	-0.241008	0.903482	NEUTRAL	PLXND1	32.8238	103.107	1.65133	0.419123	UP
hsa-miR-4488	3253.35	2433.74	0.748074	-0.418748	0.612634	NEUTRAL	PLXND1	32.8238	103.107	1.65133	0.419123	UP
hsa-miR-3656	741.52	10.2762	0.0138583	-6.17311	2.11383e-08	DOWN	PLXND1	32.8238	103.107	1.65133	0.419123	UP
hsa-miR-1469	1.16775	8.56349	7.33333	2.87447	0.128943	UP	CALCOCO2	36.4133	114.307	1.65038	0.244361	UP
hsa-miR-1285-3p	119.11	183.259	1.53856	0.621583	0.508504	NEUTRAL	CALCOCO2	36.4133	114.307	1.65038	0.244361	UP
hsa-miR-1285-3p	119.11	183.259	1.53856	0.621583	0.508504	NEUTRAL	CALCOCO2	36.4133	114.307	1.65038	0.244361	UP
hsa-miR-1285-3p	119.11	183.259	1.53856	0.621583	0.508504	NEUTRAL	CALCOCO2	36.4133	114.307	1.65038	0.244361	UP
hsa-miR-1260b	15.1807	8.56349	0.564103	-0.825971	0.546679	NEUTRAL	CALCOCO2	36.4133	114.307	1.65038	0.244361	UP
hsa-miR-6852-5p	15.1807	12.8452	0.846154	-0.241008	0.903482	NEUTRAL	PMP22	13.3326	41.7088	1.6454	0.121928	UP
hsa-miR-4516	15.1807	63.3698	4.17436	2.06155	0.0638169	UP	MOCS1	5.09574	15.9293	1.64432	0.855589	UP
hsa-miR-3176	14.013	26.5468	1.89444	0.921775	0.44803	NEUTRAL	MOCS1	5.09574	15.9293	1.64432	0.855589	UP
hsa-miR-3176	14.013	26.5468	1.89444	0.921775	0.44803	NEUTRAL	MOCS1	5.09574	15.9293	1.64432	0.855589	UP
hsa-miR-3176	14.013	26.5468	1.89444	0.921775	0.44803	NEUTRAL	MOCS1	5.09574	15.9293	1.64432	0.855589	UP
hsa-miR-3176	14.013	26.5468	1.89444	0.921775	0.44803	NEUTRAL	MOCS1	5.09574	15.9293	1.64432	0.855589	UP
hsa-miR-3176	14.013	26.5468	1.89444	0.921775	0.44803	NEUTRAL	MOCS1	5.09574	15.9293	1.64432	0.855589	UP
hsa-miR-3176	14.013	26.5468	1.89444	0.921775	0.44803	NEUTRAL	MOCS1	5.09574	15.9293	1.64432	0.855589	UP
hsa-miR-3176	14.013	26.5468	1.89444	0.921775	0.44803	NEUTRAL	MOCS1	5.09574	15.9293	1.64432	0.855589	UP
hsa-miR-3176	14.013	26.5468	1.89444	0.921775	0.44803	NEUTRAL	MDFI	0.255956	0.798264	1.64097	0.99965	UP
hsa-miR-3176	14.013	26.5468	1.89444	0.921775	0.44803	NEUTRAL	MDFI	0.255956	0.798264	1.64097	0.99965	UP
hsa-miR-3615	81.7424	93.342	1.1419	0.191442	0.856957	NEUTRAL	MDFI	0.255956	0.798264	1.64097	0.99965	UP
hsa-miR-3615	81.7424	93.342	1.1419	0.191442	0.856957	NEUTRAL	MDFI	0.255956	0.798264	1.64097	0.99965	UP
hsa-miR-23a-5p	110.936	95.0547	0.856842	-0.222899	0.824966	NEUTRAL	MDFI	0.255956	0.798264	1.64097	0.99965	UP
hsa-miR-23a-5p	110.936	95.0547	0.856842	-0.222899	0.824966	NEUTRAL	MDFI	0.255956	0.798264	1.64097	0.99965	UP
hsa-miR-766-3p	12.8452	10.2762	0.8	-0.321928	0.865138	NEUTRAL	MDFI	0.255956	0.798264	1.64097	0.99965	UP
hsa-miR-210-5p	343.318	101.049	0.294331	-1.76449	0.0554073	DOWN	MDFI	0.255956	0.798264	1.64097	0.99965	UP
hsa-miR-210-5p	343.318	101.049	0.294331	-1.76449	0.0554073	DOWN	MDFI	0.255956	0.798264	1.64097	0.99965	UP
hsa-miR-210-5p	343.318	101.049	0.294331	-1.76449	0.0554073	DOWN	MDFI	0.255956	0.798264	1.64097	0.99965	UP
hsa-miR-210-5p	343.318	101.049	0.294331	-1.76449	0.0554073	DOWN	MDFI	0.255956	0.798264	1.64097	0.99965	UP
hsa-miR-665	35.0325	53.95	1.54	0.62293	0.564592	NEUTRAL	AC009133.22,QPRT,SPN	0.692448	2.14556	1.63158	0.99965	UP
hsa-miR-665	35.0325	53.95	1.54	0.62293	0.564592	NEUTRAL	AC009133.22,QPRT,SPN	0.692448	2.14556	1.63158	0.99965	UP
hsa-miR-1285-3p	119.11	183.259	1.53856	0.621583	0.508504	NEUTRAL	AC009133.22,QPRT,SPN	0.692448	2.14556	1.63158	0.99965	UP
hsa-miR-1285-3p	119.11	183.259	1.53856	0.621583	0.508504	NEUTRAL	AC009133.22,QPRT,SPN	0.692448	2.14556	1.63158	0.99965	UP
hsa-miR-1285-3p	119.11	183.259	1.53856	0.621583	0.508504	NEUTRAL	AC009133.22,QPRT,SPN	0.692448	2.14556	1.63158	0.99965	UP
hsa-miR-5100	25.6905	35.9667	1.4	0.485427	0.679016	NEUTRAL	AC009133.22,QPRT,SPN	0.692448	2.14556	1.63158	0.99965	UP
hsa-miR-5100	25.6905	35.9667	1.4	0.485427	0.679016	NEUTRAL	AC009133.22,QPRT,SPN	0.692448	2.14556	1.63158	0.99965	UP
hsa-miR-5100	25.6905	35.9667	1.4	0.485427	0.679016	NEUTRAL	AC009133.22,QPRT,SPN	0.692448	2.14556	1.63158	0.99965	UP
hsa-miR-1301-3p	18.684	19.696	1.05417	0.076103	1	NEUTRAL	AC009133.22,QPRT,SPN	0.692448	2.14556	1.63158	0.99965	UP
hsa-miR-1301-3p	18.684	19.696	1.05417	0.076103	1	NEUTRAL	AC009133.22,QPRT,SPN	0.692448	2.14556	1.63158	0.99965	UP
hsa-miR-1301-3p	18.684	19.696	1.05417	0.076103	1	NEUTRAL	AC009133.22,QPRT,SPN	0.692448	2.14556	1.63158	0.99965	UP
hsa-miR-3909	429.731	447.014	1.04022	0.0568851	0.95088	NEUTRAL	AC009133.22,QPRT,SPN	0.692448	2.14556	1.63158	0.99965	UP
hsa-miR-3909	429.731	447.014	1.04022	0.0568851	0.95088	NEUTRAL	AC009133.22,QPRT,SPN	0.692448	2.14556	1.63158	0.99965	UP
hsa-miR-3909	429.731	447.014	1.04022	0.0568851	0.95088	NEUTRAL	AC009133.22,QPRT,SPN	0.692448	2.14556	1.63158	0.99965	UP
hsa-miR-3909	429.731	447.014	1.04022	0.0568851	0.95088	NEUTRAL	AC009133.22,QPRT,SPN	0.692448	2.14556	1.63158	0.99965	UP
hsa-miR-140-3p	2426.58	2252.2	0.928136	-0.107592	0.895859	NEUTRAL	AC009133.22,QPRT,SPN	0.692448	2.14556	1.63158	0.99965	UP
hsa-miR-140-3p	2426.58	2252.2	0.928136	-0.107592	0.895859	NEUTRAL	AC009133.22,QPRT,SPN	0.692448	2.14556	1.63158	0.99965	UP
hsa-miR-6852-5p	15.1807	12.8452	0.846154	-0.241008	0.903482	NEUTRAL	AC009133.22,QPRT,SPN	0.692448	2.14556	1.63158	0.99965	UP
hsa-miR-6852-5p	15.1807	12.8452	0.846154	-0.241008	0.903482	NEUTRAL	AC009133.22,QPRT,SPN	0.692448	2.14556	1.63158	0.99965	UP
hsa-miR-6852-5p	15.1807	12.8452	0.846154	-0.241008	0.903482	NEUTRAL	AC009133.22,QPRT,SPN	0.692448	2.14556	1.63158	0.99965	UP
hsa-miR-6852-5p	15.1807	12.8452	0.846154	-0.241008	0.903482	NEUTRAL	AC009133.22,QPRT,SPN	0.692448	2.14556	1.63158	0.99965	UP
hsa-miR-2277-3p	8.17424	12.8452	1.57143	0.652077	0.672249	NEUTRAL	SLC6A9	5.42203	16.7742	1.62934	0.259661	UP
hsa-miR-874-3p	168.156	259.474	1.54306	0.62579	0.491682	NEUTRAL	SLC6A9	5.42203	16.7742	1.62934	0.259661	UP
hsa-miR-1296-5p	254.569	327.125	1.28502	0.361786	0.684707	NEUTRAL	SLC6A9	5.42203	16.7742	1.62934	0.259661	UP
hsa-miR-328-3p	142.465	68.5079	0.480874	-1.05627	0.275341	DOWN	SLC6A9	5.42203	16.7742	1.62934	0.259661	UP
hsa-miR-328-3p	142.465	68.5079	0.480874	-1.05627	0.275341	DOWN	SLC6A9	5.42203	16.7742	1.62934	0.259661	UP
hsa-miR-328-3p	142.465	68.5079	0.480874	-1.05627	0.275341	DOWN	SLC6A9	5.42203	16.7742	1.62934	0.259661	UP
hsa-miR-328-3p	142.465	68.5079	0.480874	-1.05627	0.275341	DOWN	SLC6A9	5.42203	16.7742	1.62934	0.259661	UP
hsa-miR-4466	12.8452	21.4087	1.66667	0.736966	0.567146	NEUTRAL	CCND3	21.094	65.1251	1.62638	0.158054	UP
hsa-miR-2277-5p	36.2002	58.2317	1.6086	0.685808	0.520897	NEUTRAL	CCND3	21.094	65.1251	1.62638	0.158054	UP
hsa-miR-2277-5p	36.2002	58.2317	1.6086	0.685808	0.520897	NEUTRAL	CCND3	21.094	65.1251	1.62638	0.158054	UP
hsa-miR-2277-5p	36.2002	58.2317	1.6086	0.685808	0.520897	NEUTRAL	CCND3	21.094	65.1251	1.62638	0.158054	UP
hsa-miR-766-3p	12.8452	10.2762	0.8	-0.321928	0.865138	NEUTRAL	CCND3	21.094	65.1251	1.62638	0.158054	UP
hsa-miR-744-5p	850.121	678.228	0.797802	-0.325897	0.696683	NEUTRAL	CCND3	21.094	65.1251	1.62638	0.158054	UP
hsa-miR-1260b	15.1807	8.56349	0.564103	-0.825971	0.546679	NEUTRAL	CHN1	2.07011	6.375	1.62272	0.652693	UP
hsa-miR-3176	14.013	26.5468	1.89444	0.921775	0.44803	NEUTRAL	COL8A1	276.669	849.709	1.61881	0.99965	UP
hsa-miR-3176	14.013	26.5468	1.89444	0.921775	0.44803	NEUTRAL	COL8A1	276.669	849.709	1.61881	0.99965	UP
hsa-miR-4466	12.8452	21.4087	1.66667	0.736966	0.567146	NEUTRAL	COL8A1	276.669	849.709	1.61881	0.99965	UP
hsa-miR-4466	12.8452	21.4087	1.66667	0.736966	0.567146	NEUTRAL	COL8A1	276.669	849.709	1.61881	0.99965	UP
hsa-miR-665	35.0325	53.95	1.54	0.62293	0.564592	NEUTRAL	COL8A1	276.669	849.709	1.61881	0.99965	UP
hsa-miR-6852-5p	15.1807	12.8452	0.846154	-0.241008	0.903482	NEUTRAL	COL8A1	276.669	849.709	1.61881	0.99965	UP
hsa-miR-6852-5p	15.1807	12.8452	0.846154	-0.241008	0.903482	NEUTRAL	COL8A1	276.669	849.709	1.61881	0.99965	UP
hsa-miR-668-3p	51.3809	24.8341	0.483333	-1.04891	0.329782	DOWN	COL8A1	276.669	849.709	1.61881	0.99965	UP
hsa-miR-668-3p	51.3809	24.8341	0.483333	-1.04891	0.329782	DOWN	COL8A1	276.669	849.709	1.61881	0.99965	UP
hsa-miR-4508	179.833	108.756	0.604762	-0.725561	0.439635	NEUTRAL	PPP1R36	0.308032	0.937256	1.60536	0.99965	UP
hsa-miR-4516	15.1807	63.3698	4.17436	2.06155	0.0638169	UP	DCLK1	0.234823	0.712509	1.60133	0.99965	UP
hsa-miR-4516	15.1807	63.3698	4.17436	2.06155	0.0638169	UP	DCLK1	0.234823	0.712509	1.60133	0.99965	UP
hsa-miR-4516	15.1807	63.3698	4.17436	2.06155	0.0638169	UP	DCLK1	0.234823	0.712509	1.60133	0.99965	UP
hsa-miR-3960	12.8452	3.4254	0.266667	-1.90689	0.182003	DOWN	DCLK1	0.234823	0.712509	1.60133	0.99965	UP
hsa-miR-3960	12.8452	3.4254	0.266667	-1.90689	0.182003	DOWN	DCLK1	0.234823	0.712509	1.60133	0.99965	UP
hsa-miR-3960	12.8452	3.4254	0.266667	-1.90689	0.182003	DOWN	DCLK1	0.234823	0.712509	1.60133	0.99965	UP
hsa-miR-1285-3p	119.11	183.259	1.53856	0.621583	0.508504	NEUTRAL	WDR62	0.151578	0.458658	1.59735	0.99965	UP
hsa-miR-149-5p	416.886	306.573	0.735387	-0.443423	0.61018	NEUTRAL	WDR62	0.151578	0.458658	1.59735	0.99965	UP
hsa-miR-149-5p	416.886	306.573	0.735387	-0.443423	0.61018	NEUTRAL	WDR62	0.151578	0.458658	1.59735	0.99965	UP
hsa-miR-149-5p	416.886	306.573	0.735387	-0.443423	0.61018	NEUTRAL	WDR62	0.151578	0.458658	1.59735	0.99965	UP
hsa-miR-4466	12.8452	21.4087	1.66667	0.736966	0.567146	NEUTRAL	CLTCL1	3.26696	9.83249	1.58961	0.325124	UP
hsa-miR-4466	12.8452	21.4087	1.66667	0.736966	0.567146	NEUTRAL	CLTCL1	3.26696	9.83249	1.58961	0.325124	UP
hsa-miR-4466	12.8452	21.4087	1.66667	0.736966	0.567146	NEUTRAL	CLTCL1	3.26696	9.83249	1.58961	0.325124	UP
hsa-miR-125a-3p	106.265	107.044	1.00733	0.0105307	1	NEUTRAL	CLTCL1	3.26696	9.83249	1.58961	0.325124	UP
hsa-miR-3960	12.8452	3.4254	0.266667	-1.90689	0.182003	DOWN	CLTCL1	3.26696	9.83249	1.58961	0.325124	UP
hsa-miR-3960	12.8452	3.4254	0.266667	-1.90689	0.182003	DOWN	CLTCL1	3.26696	9.83249	1.58961	0.325124	UP
hsa-miR-3960	12.8452	3.4254	0.266667	-1.90689	0.182003	DOWN	CLTCL1	3.26696	9.83249	1.58961	0.325124	UP
hsa-miR-4516	15.1807	63.3698	4.17436	2.06155	0.0638169	UP	CBX2	0.662473	1.99291	1.58894	0.99965	UP
hsa-miR-940	5.83874	15.4143	2.64	1.40054	0.31347	UP	CBX2	0.662473	1.99291	1.58894	0.99965	UP
hsa-miR-296-5p	16.3485	24.8341	1.51905	0.603167	0.631192	NEUTRAL	CBX2	0.662473	1.99291	1.58894	0.99965	UP
hsa-miR-671-5p	58.3874	71.077	1.21733	0.283724	0.792222	NEUTRAL	CBX2	0.662473	1.99291	1.58894	0.99965	UP
hsa-miR-5787	12.8452	12.8452	1	0	1	NEUTRAL	CBX2	0.662473	1.99291	1.58894	0.99965	UP
hsa-miR-874-5p	15.1807	30.8286	2.03077	1.02203	0.386358	UP	TMEM86A	0.450449	1.35272	1.58642	0.99965	UP
hsa-miR-4324	5.83874	11.1325	1.90667	0.931053	0.54709	NEUTRAL	TMEM86A	0.450449	1.35272	1.58642	0.99965	UP
hsa-miR-125a-5p	25628.6	48257.8	1.88297	0.91301	0.344622	NEUTRAL	TMEM86A	0.450449	1.35272	1.58642	0.99965	UP
hsa-miR-877-5p	19.8517	9.41984	0.47451	-1.07549	0.396051	DOWN	TMEM86A	0.450449	1.35272	1.58642	0.99965	UP
hsa-miR-877-5p	19.8517	9.41984	0.47451	-1.07549	0.396051	DOWN	TMEM86A	0.450449	1.35272	1.58642	0.99965	UP
hsa-miR-877-5p	19.8517	9.41984	0.47451	-1.07549	0.396051	DOWN	TMEM86A	0.450449	1.35272	1.58642	0.99965	UP
hsa-miR-3960	12.8452	3.4254	0.266667	-1.90689	0.182003	DOWN	TMEM86A	0.450449	1.35272	1.58642	0.99965	UP
hsa-miR-3960	12.8452	3.4254	0.266667	-1.90689	0.182003	DOWN	TMEM86A	0.450449	1.35272	1.58642	0.99965	UP
hsa-miR-3960	12.8452	3.4254	0.266667	-1.90689	0.182003	DOWN	TMEM86A	0.450449	1.35272	1.58642	0.99965	UP
hsa-miR-331-3p	391.196	240.634	0.615124	-0.70105	0.42477	NEUTRAL	CYP11A1	0.552846	1.65644	1.58313	0.99965	UP
hsa-miR-331-3p	391.196	240.634	0.615124	-0.70105	0.42477	NEUTRAL	CYP11A1	0.552846	1.65644	1.58313	0.99965	UP
hsa-miR-331-3p	391.196	240.634	0.615124	-0.70105	0.42477	NEUTRAL	CYP11A1	0.552846	1.65644	1.58313	0.99965	UP
hsa-miR-331-3p	391.196	240.634	0.615124	-0.70105	0.42477	NEUTRAL	CYP11A1	0.552846	1.65644	1.58313	0.99965	UP
hsa-miR-3960	12.8452	3.4254	0.266667	-1.90689	0.182003	DOWN	CYP11A1	0.552846	1.65644	1.58313	0.99965	UP
hsa-miR-1469	1.16775	8.56349	7.33333	2.87447	0.128943	UP	KCNB1	0.238654	0.711582	1.57611	0.99965	UP
hsa-miR-874-5p	15.1807	30.8286	2.03077	1.02203	0.386358	UP	KCNB1	0.238654	0.711582	1.57611	0.99965	UP
hsa-miR-342-3p	321.131	538.643	1.67733	0.746169	0.387387	NEUTRAL	KCNB1	0.238654	0.711582	1.57611	0.99965	UP
hsa-miR-1285-3p	119.11	183.259	1.53856	0.621583	0.508504	NEUTRAL	KCNB1	0.238654	0.711582	1.57611	0.99965	UP
hsa-miR-665	35.0325	53.95	1.54	0.62293	0.564592	NEUTRAL	C1QTNF5,MFRP	8.74837	26.0794	1.57582	0.515306	UP
hsa-miR-665	35.0325	53.95	1.54	0.62293	0.564592	NEUTRAL	C1QTNF5,MFRP	8.74837	26.0794	1.57582	0.515306	UP
hsa-miR-665	35.0325	53.95	1.54	0.62293	0.564592	NEUTRAL	C1QTNF5,MFRP	8.74837	26.0794	1.57582	0.515306	UP
hsa-miR-766-3p	12.8452	10.2762	0.8	-0.321928	0.865138	NEUTRAL	C1QTNF5,MFRP	8.74837	26.0794	1.57582	0.515306	UP
hsa-miR-766-3p	12.8452	10.2762	0.8	-0.321928	0.865138	NEUTRAL	C1QTNF5,MFRP	8.74837	26.0794	1.57582	0.515306	UP
hsa-miR-766-3p	12.8452	10.2762	0.8	-0.321928	0.865138	NEUTRAL	C1QTNF5,MFRP	8.74837	26.0794	1.57582	0.515306	UP
hsa-miR-766-3p	12.8452	10.2762	0.8	-0.321928	0.865138	NEUTRAL	C1QTNF5,MFRP	8.74837	26.0794	1.57582	0.515306	UP
hsa-miR-874-3p	168.156	259.474	1.54306	0.62579	0.491682	NEUTRAL	PIK3R3,RP11-322N21.2,RP4-533D7.6	0.915137	2.72575	1.57459	0.949687	UP
hsa-miR-874-3p	168.156	259.474	1.54306	0.62579	0.491682	NEUTRAL	PIK3R3,RP11-322N21.2,RP4-533D7.6	0.915137	2.72575	1.57459	0.949687	UP
hsa-miR-4516	15.1807	63.3698	4.17436	2.06155	0.0638169	UP	HES4	0.416633	1.24034	1.57389	0.99965	UP
hsa-miR-4516	15.1807	63.3698	4.17436	2.06155	0.0638169	UP	HES4	0.416633	1.24034	1.57389	0.99965	UP
hsa-miR-4516	15.1807	63.3698	4.17436	2.06155	0.0638169	UP	HES4	0.416633	1.24034	1.57389	0.99965	UP
hsa-miR-4516	15.1807	63.3698	4.17436	2.06155	0.0638169	UP	HES4	0.416633	1.24034	1.57389	0.99965	UP
hsa-miR-3200-3p	15.1807	10.2762	0.676923	-0.562936	0.696476	NEUTRAL	HES4	0.416633	1.24034	1.57389	0.99965	UP
hsa-miR-3200-3p	15.1807	10.2762	0.676923	-0.562936	0.696476	NEUTRAL	HES4	0.416633	1.24034	1.57389	0.99965	UP
hsa-miR-940	5.83874	15.4143	2.64	1.40054	0.31347	UP	ACAN	1.51602	4.50652	1.57173	0.755127	UP
hsa-miR-940	5.83874	15.4143	2.64	1.40054	0.31347	UP	ACAN	1.51602	4.50652	1.57173	0.755127	UP
hsa-miR-940	5.83874	15.4143	2.64	1.40054	0.31347	UP	ACAN	1.51602	4.50652	1.57173	0.755127	UP
hsa-miR-940	5.83874	15.4143	2.64	1.40054	0.31347	UP	ACAN	1.51602	4.50652	1.57173	0.755127	UP
hsa-miR-940	5.83874	15.4143	2.64	1.40054	0.31347	UP	ACAN	1.51602	4.50652	1.57173	0.755127	UP
hsa-miR-940	5.83874	15.4143	2.64	1.40054	0.31347	UP	ACAN	1.51602	4.50652	1.57173	0.755127	UP
hsa-miR-143-3p	325780	370195	1.13634	0.18439	0.889468	NEUTRAL	ACAN	1.51602	4.50652	1.57173	0.755127	UP
hsa-miR-143-3p	325780	370195	1.13634	0.18439	0.889468	NEUTRAL	ACAN	1.51602	4.50652	1.57173	0.755127	UP
hsa-miR-143-3p	325780	370195	1.13634	0.18439	0.889468	NEUTRAL	ACAN	1.51602	4.50652	1.57173	0.755127	UP
hsa-miR-143-3p	325780	370195	1.13634	0.18439	0.889468	NEUTRAL	ACAN	1.51602	4.50652	1.57173	0.755127	UP
hsa-miR-143-3p	325780	370195	1.13634	0.18439	0.889468	NEUTRAL	ACAN	1.51602	4.50652	1.57173	0.755127	UP
hsa-miR-28-3p	8998.67	8411.06	0.9347	-0.0974243	0.909107	NEUTRAL	ACAN	1.51602	4.50652	1.57173	0.755127	UP
hsa-miR-28-3p	8998.67	8411.06	0.9347	-0.0974243	0.909107	NEUTRAL	ACAN	1.51602	4.50652	1.57173	0.755127	UP
hsa-miR-28-3p	8998.67	8411.06	0.9347	-0.0974243	0.909107	NEUTRAL	ACAN	1.51602	4.50652	1.57173	0.755127	UP
hsa-miR-28-3p	8998.67	8411.06	0.9347	-0.0974243	0.909107	NEUTRAL	ACAN	1.51602	4.50652	1.57173	0.755127	UP
hsa-miR-28-3p	8998.67	8411.06	0.9347	-0.0974243	0.909107	NEUTRAL	ACAN	1.51602	4.50652	1.57173	0.755127	UP
hsa-miR-23a-5p	110.936	95.0547	0.856842	-0.222899	0.824966	NEUTRAL	ACAN	1.51602	4.50652	1.57173	0.755127	UP
hsa-miR-23a-5p	110.936	95.0547	0.856842	-0.222899	0.824966	NEUTRAL	ACAN	1.51602	4.50652	1.57173	0.755127	UP
hsa-miR-23a-5p	110.936	95.0547	0.856842	-0.222899	0.824966	NEUTRAL	ACAN	1.51602	4.50652	1.57173	0.755127	UP
hsa-miR-23a-5p	110.936	95.0547	0.856842	-0.222899	0.824966	NEUTRAL	ACAN	1.51602	4.50652	1.57173	0.755127	UP
hsa-miR-23a-5p	110.936	95.0547	0.856842	-0.222899	0.824966	NEUTRAL	ACAN	1.51602	4.50652	1.57173	0.755127	UP
hsa-miR-23a-5p	110.936	95.0547	0.856842	-0.222899	0.824966	NEUTRAL	ACAN	1.51602	4.50652	1.57173	0.755127	UP
hsa-miR-1469	1.16775	8.56349	7.33333	2.87447	0.128943	UP	FMNL1	1.95179	5.75566	1.56018	0.99965	UP
hsa-miR-1469	1.16775	8.56349	7.33333	2.87447	0.128943	UP	FMNL1	1.95179	5.75566	1.56018	0.99965	UP
hsa-miR-4466	12.8452	21.4087	1.66667	0.736966	0.567146	NEUTRAL	FMNL1	1.95179	5.75566	1.56018	0.99965	UP
hsa-miR-4466	12.8452	21.4087	1.66667	0.736966	0.567146	NEUTRAL	FMNL1	1.95179	5.75566	1.56018	0.99965	UP
hsa-miR-4466	12.8452	21.4087	1.66667	0.736966	0.567146	NEUTRAL	FMNL1	1.95179	5.75566	1.56018	0.99965	UP
hsa-miR-4466	12.8452	21.4087	1.66667	0.736966	0.567146	NEUTRAL	FMNL1	1.95179	5.75566	1.56018	0.99965	UP
hsa-miR-134-3p	8.17424	11.1325	1.3619	0.445626	0.8105	NEUTRAL	FMNL1	1.95179	5.75566	1.56018	0.99965	UP
hsa-miR-1275	32.697	39.392	1.20476	0.268748	0.826939	NEUTRAL	FMNL1	1.95179	5.75566	1.56018	0.99965	UP
hsa-miR-1275	32.697	39.392	1.20476	0.268748	0.826939	NEUTRAL	FMNL1	1.95179	5.75566	1.56018	0.99965	UP
hsa-miR-1275	32.697	39.392	1.20476	0.268748	0.826939	NEUTRAL	FMNL1	1.95179	5.75566	1.56018	0.99965	UP
hsa-miR-1304-3p	161.149	160.994	0.999034	-0.00139458	1	NEUTRAL	FMNL1	1.95179	5.75566	1.56018	0.99965	UP
hsa-miR-3074-5p	31.5292	27.4032	0.869136	-0.202346	0.883564	NEUTRAL	FMNL1	1.95179	5.75566	1.56018	0.99965	UP
hsa-miR-766-3p	12.8452	10.2762	0.8	-0.321928	0.865138	NEUTRAL	FMNL1	1.95179	5.75566	1.56018	0.99965	UP
hsa-miR-766-3p	12.8452	10.2762	0.8	-0.321928	0.865138	NEUTRAL	FMNL1	1.95179	5.75566	1.56018	0.99965	UP
hsa-miR-766-3p	12.8452	10.2762	0.8	-0.321928	0.865138	NEUTRAL	FMNL1	1.95179	5.75566	1.56018	0.99965	UP
hsa-miR-766-3p	12.8452	10.2762	0.8	-0.321928	0.865138	NEUTRAL	FMNL1	1.95179	5.75566	1.56018	0.99965	UP
hsa-miR-4488	3253.35	2433.74	0.748074	-0.418748	0.612634	NEUTRAL	FMNL1	1.95179	5.75566	1.56018	0.99965	UP
hsa-miR-4488	3253.35	2433.74	0.748074	-0.418748	0.612634	NEUTRAL	FMNL1	1.95179	5.75566	1.56018	0.99965	UP
hsa-miR-4488	3253.35	2433.74	0.748074	-0.418748	0.612634	NEUTRAL	FMNL1	1.95179	5.75566	1.56018	0.99965	UP
hsa-miR-328-3p	142.465	68.5079	0.480874	-1.05627	0.275341	DOWN	FMNL1	1.95179	5.75566	1.56018	0.99965	UP
hsa-miR-3960	12.8452	3.4254	0.266667	-1.90689	0.182003	DOWN	FMNL1	1.95179	5.75566	1.56018	0.99965	UP
hsa-miR-3960	12.8452	3.4254	0.266667	-1.90689	0.182003	DOWN	FMNL1	1.95179	5.75566	1.56018	0.99965	UP
hsa-miR-3960	12.8452	3.4254	0.266667	-1.90689	0.182003	DOWN	FMNL1	1.95179	5.75566	1.56018	0.99965	UP
[truncated: 66,874 more rows]

## Sheet: 1_VS_3
miRNA (Subject)	Control Expression	Treated Expression	FoldChange	log2FoldChange*	P Value	Regulation	Gene_Symbol	Control Expression	Treated Expression	log2FoldChange	P Value	Regulation
hsa-miR-1304-5p	2.26346	8.83604	3.90378	1.96487	0.196082	UP	GYG2P1	0.0955194	3.37622	5.14347	0.99965	UP
hsa-miR-1304-5p	2.26346	8.83604	3.90378	1.96487	0.196082	UP	GYG2P1	0.0955194	3.37622	5.14347	0.99965	UP
hsa-miR-887-5p	6.79037	9.71964	1.43139	0.517413	0.759969	NEUTRAL	NHSL2	0.0748418	1.31657	4.1368	0.99965	UP
hsa-miR-887-5p	6.79037	9.71964	1.43139	0.517413	0.759969	NEUTRAL	NHSL2	0.0748418	1.31657	4.1368	0.99965	UP
hsa-miR-328-3p	138.071	91.0112	0.659163	-0.601293	0.468725	NEUTRAL	ENO4	0.0331332	0.577044	4.12233	0.99965	UP
hsa-miR-328-3p	138.071	91.0112	0.659163	-0.601293	0.468725	NEUTRAL	ENO4	0.0331332	0.577044	4.12233	0.99965	UP
hsa-miR-328-3p	138.071	91.0112	0.659163	-0.601293	0.468725	NEUTRAL	ENO4	0.0331332	0.577044	4.12233	0.99965	UP
hsa-miR-5787	12.449	3068.76	246.506	7.94548	1.13133e-14	UP	IL2RB	0.0227196	0.3832	4.07609	0.99965	UP
hsa-miR-671-5p	56.5864	116.636	2.0612	1.04348	0.222883	UP	IL2RB	0.0227196	0.3832	4.07609	0.99965	UP
hsa-miR-874-5p	14.7125	30.0425	2.04198	1.02997	0.342866	UP	IL2RB	0.0227196	0.3832	4.07609	0.99965	UP
hsa-miR-431-3p	66.772	68.9211	1.03219	0.0457027	0.97798	NEUTRAL	IL2RB	0.0227196	0.3832	4.07609	0.99965	UP
hsa-miR-324-3p	18.1077	17.6721	0.975945	-0.0351284	1	NEUTRAL	IL2RB	0.0227196	0.3832	4.07609	0.99965	UP
hsa-miR-370-3p	169.759	161.7	0.952522	-0.0701753	0.937972	NEUTRAL	IL2RB	0.0227196	0.3832	4.07609	0.99965	UP
hsa-miR-149-5p	404.027	333.119	0.824496	-0.278416	0.722644	NEUTRAL	IL2RB	0.0227196	0.3832	4.07609	0.99965	UP
hsa-miR-146b-3p	18.1077	3.53442	0.195189	-2.35706	0.0605725	DOWN	IL2RB	0.0227196	0.3832	4.07609	0.99965	UP
hsa-miR-331-3p	379.129	285.404	0.752789	-0.409683	0.601587	NEUTRAL	ADAMTS16	0.0571437	0.960702	4.07142	0.99965	UP
hsa-miR-3615	79.221	71.5719	0.903446	-0.14649	0.879307	NEUTRAL	HLA-H	0.704324	11.239	3.99613	0.07393	UP
hsa-miR-3615	79.221	71.5719	0.903446	-0.14649	0.879307	NEUTRAL	HLA-H	0.704324	11.239	3.99613	0.07393	UP
hsa-miR-3615	79.221	71.5719	0.903446	-0.14649	0.879307	NEUTRAL	HLA-H	0.704324	11.239	3.99613	0.07393	UP
hsa-miR-3615	79.221	71.5719	0.903446	-0.14649	0.879307	NEUTRAL	HLA-H	0.704324	11.239	3.99613	0.07393	UP
hsa-miR-3615	79.221	71.5719	0.903446	-0.14649	0.879307	NEUTRAL	HLA-H	0.704324	11.239	3.99613	0.07393	UP
hsa-miR-4508	174.286	101.614	0.583032	-0.778353	0.340317	NEUTRAL	HLA-H	0.704324	11.239	3.99613	0.07393	UP
hsa-miR-4508	174.286	101.614	0.583032	-0.778353	0.340317	NEUTRAL	HLA-H	0.704324	11.239	3.99613	0.07393	UP
hsa-miR-4508	174.286	101.614	0.583032	-0.778353	0.340317	NEUTRAL	HLA-H	0.704324	11.239	3.99613	0.07393	UP
hsa-miR-4508	174.286	101.614	0.583032	-0.778353	0.340317	NEUTRAL	HLA-H	0.704324	11.239	3.99613	0.07393	UP
hsa-miR-4508	174.286	101.614	0.583032	-0.778353	0.340317	NEUTRAL	HLA-H	0.704324	11.239	3.99613	0.07393	UP
hsa-miR-4508	174.286	101.614	0.583032	-0.778353	0.340317	NEUTRAL	HLA-H	0.704324	11.239	3.99613	0.07393	UP
hsa-miR-4508	174.286	101.614	0.583032	-0.778353	0.340317	NEUTRAL	HLA-H	0.704324	11.239	3.99613	0.07393	UP
hsa-miR-4508	174.286	101.614	0.583032	-0.778353	0.340317	NEUTRAL	HLA-H	0.704324	11.239	3.99613	0.07393	UP
hsa-miR-185-3p	5.65864	12.3705	2.18612	1.12837	0.393641	UP	LILRA6,LILRB2,LILRB3	0.0488278	0.490187	3.32756	0.974532	UP
hsa-miR-185-3p	5.65864	12.3705	2.18612	1.12837	0.393641	UP	LILRA6,LILRB2,LILRB3	0.0488278	0.490187	3.32756	0.974532	UP
hsa-miR-185-3p	5.65864	12.3705	2.18612	1.12837	0.393641	UP	LILRA6,LILRB2,LILRB3	0.0488278	0.490187	3.32756	0.974532	UP
hsa-miR-185-3p	5.65864	12.3705	2.18612	1.12837	0.393641	UP	LILRA6,LILRB2,LILRB3	0.0488278	0.490187	3.32756	0.974532	UP
hsa-miR-185-3p	5.65864	12.3705	2.18612	1.12837	0.393641	UP	LILRA6,LILRB2,LILRB3	0.0488278	0.490187	3.32756	0.974532	UP
hsa-miR-185-3p	5.65864	12.3705	2.18612	1.12837	0.393641	UP	LILRA6,LILRB2,LILRB3	0.0488278	0.490187	3.32756	0.974532	UP
hsa-miR-185-3p	5.65864	12.3705	2.18612	1.12837	0.393641	UP	LILRA6,LILRB2,LILRB3	0.0488278	0.490187	3.32756	0.974532	UP
hsa-miR-185-3p	5.65864	12.3705	2.18612	1.12837	0.393641	UP	LILRA6,LILRB2,LILRB3	0.0488278	0.490187	3.32756	0.974532	UP
hsa-miR-185-3p	5.65864	12.3705	2.18612	1.12837	0.393641	UP	LILRA6,LILRB2,LILRB3	0.0488278	0.490187	3.32756	0.974532	UP
hsa-miR-185-3p	5.65864	12.3705	2.18612	1.12837	0.393641	UP	LILRA6,LILRB2,LILRB3	0.0488278	0.490187	3.32756	0.974532	UP
hsa-miR-185-3p	5.65864	12.3705	2.18612	1.12837	0.393641	UP	LILRA6,LILRB2,LILRB3	0.0488278	0.490187	3.32756	0.974532	UP
hsa-miR-185-3p	5.65864	12.3705	2.18612	1.12837	0.393641	UP	LILRA6,LILRB2,LILRB3	0.0488278	0.490187	3.32756	0.974532	UP
hsa-miR-185-3p	5.65864	12.3705	2.18612	1.12837	0.393641	UP	LILRA6,LILRB2,LILRB3	0.0488278	0.490187	3.32756	0.974532	UP
hsa-miR-185-3p	5.65864	12.3705	2.18612	1.12837	0.393641	UP	LILRA6,LILRB2,LILRB3	0.0488278	0.490187	3.32756	0.974532	UP
hsa-miR-185-3p	5.65864	12.3705	2.18612	1.12837	0.393641	UP	LILRA6,LILRB2,LILRB3	0.0488278	0.490187	3.32756	0.974532	UP
hsa-miR-185-3p	5.65864	12.3705	2.18612	1.12837	0.393641	UP	LILRA6,LILRB2,LILRB3	0.0488278	0.490187	3.32756	0.974532	UP
hsa-miR-185-3p	5.65864	12.3705	2.18612	1.12837	0.393641	UP	LILRA6,LILRB2,LILRB3	0.0488278	0.490187	3.32756	0.974532	UP
hsa-miR-185-3p	5.65864	12.3705	2.18612	1.12837	0.393641	UP	LILRA6,LILRB2,LILRB3	0.0488278	0.490187	3.32756	0.974532	UP
hsa-miR-185-3p	5.65864	12.3705	2.18612	1.12837	0.393641	UP	LILRA6,LILRB2,LILRB3	0.0488278	0.490187	3.32756	0.974532	UP
hsa-miR-185-3p	5.65864	12.3705	2.18612	1.12837	0.393641	UP	LILRA6,LILRB2,LILRB3	0.0488278	0.490187	3.32756	0.974532	UP
hsa-miR-185-3p	5.65864	12.3705	2.18612	1.12837	0.393641	UP	LILRA6,LILRB2,LILRB3	0.0488278	0.490187	3.32756	0.974532	UP
hsa-miR-185-3p	5.65864	12.3705	2.18612	1.12837	0.393641	UP	LILRA6,LILRB2,LILRB3	0.0488278	0.490187	3.32756	0.974532	UP
hsa-miR-185-3p	5.65864	12.3705	2.18612	1.12837	0.393641	UP	LILRA6,LILRB2,LILRB3	0.0488278	0.490187	3.32756	0.974532	UP
hsa-miR-185-3p	5.65864	12.3705	2.18612	1.12837	0.393641	UP	LILRA6,LILRB2,LILRB3	0.0488278	0.490187	3.32756	0.974532	UP
hsa-miR-185-3p	5.65864	12.3705	2.18612	1.12837	0.393641	UP	LILRA6,LILRB2,LILRB3	0.0488278	0.490187	3.32756	0.974532	UP
hsa-miR-185-3p	5.65864	12.3705	2.18612	1.12837	0.393641	UP	LILRA6,LILRB2,LILRB3	0.0488278	0.490187	3.32756	0.974532	UP
hsa-miR-185-3p	5.65864	12.3705	2.18612	1.12837	0.393641	UP	LILRA6,LILRB2,LILRB3	0.0488278	0.490187	3.32756	0.974532	UP
hsa-miR-185-3p	5.65864	12.3705	2.18612	1.12837	0.393641	UP	LILRA6,LILRB2,LILRB3	0.0488278	0.490187	3.32756	0.974532	UP
hsa-miR-185-3p	5.65864	12.3705	2.18612	1.12837	0.393641	UP	LILRA6,LILRB2,LILRB3	0.0488278	0.490187	3.32756	0.974532	UP
hsa-miR-185-3p	5.65864	12.3705	2.18612	1.12837	0.393641	UP	LILRA6,LILRB2,LILRB3	0.0488278	0.490187	3.32756	0.974532	UP
hsa-miR-185-3p	5.65864	12.3705	2.18612	1.12837	0.393641	UP	LILRA6,LILRB2,LILRB3	0.0488278	0.490187	3.32756	0.974532	UP
hsa-miR-185-3p	5.65864	12.3705	2.18612	1.12837	0.393641	UP	LILRA6,LILRB2,LILRB3	0.0488278	0.490187	3.32756	0.974532	UP
hsa-miR-185-3p	5.65864	12.3705	2.18612	1.12837	0.393641	UP	LILRA6,LILRB2,LILRB3	0.0488278	0.490187	3.32756	0.974532	UP
hsa-miR-185-3p	5.65864	12.3705	2.18612	1.12837	0.393641	UP	LILRA6,LILRB2,LILRB3	0.0488278	0.490187	3.32756	0.974532	UP
hsa-miR-185-3p	5.65864	12.3705	2.18612	1.12837	0.393641	UP	LILRA6,LILRB2,LILRB3	0.0488278	0.490187	3.32756	0.974532	UP
hsa-miR-185-3p	5.65864	12.3705	2.18612	1.12837	0.393641	UP	LILRA6,LILRB2,LILRB3	0.0488278	0.490187	3.32756	0.974532	UP
hsa-miR-185-3p	5.65864	12.3705	2.18612	1.12837	0.393641	UP	LILRA6,LILRB2,LILRB3	0.0488278	0.490187	3.32756	0.974532	UP
hsa-miR-185-3p	5.65864	12.3705	2.18612	1.12837	0.393641	UP	LILRA6,LILRB2,LILRB3	0.0488278	0.490187	3.32756	0.974532	UP
hsa-miR-185-3p	5.65864	12.3705	2.18612	1.12837	0.393641	UP	LILRA6,LILRB2,LILRB3	0.0488278	0.490187	3.32756	0.974532	UP
hsa-miR-185-3p	5.65864	12.3705	2.18612	1.12837	0.393641	UP	LILRA6,LILRB2,LILRB3	0.0488278	0.490187	3.32756	0.974532	UP
hsa-miR-185-3p	5.65864	12.3705	2.18612	1.12837	0.393641	UP	LILRA6,LILRB2,LILRB3	0.0488278	0.490187	3.32756	0.974532	UP
hsa-miR-185-3p	5.65864	12.3705	2.18612	1.12837	0.393641	UP	LILRA6,LILRB2,LILRB3	0.0488278	0.490187	3.32756	0.974532	UP
hsa-miR-185-3p	5.65864	12.3705	2.18612	1.12837	0.393641	UP	LILRA6,LILRB2,LILRB3	0.0488278	0.490187	3.32756	0.974532	UP
hsa-miR-185-3p	5.65864	12.3705	2.18612	1.12837	0.393641	UP	LILRA6,LILRB2,LILRB3	0.0488278	0.490187	3.32756	0.974532	UP
hsa-miR-185-3p	5.65864	12.3705	2.18612	1.12837	0.393641	UP	LILRA6,LILRB2,LILRB3	0.0488278	0.490187	3.32756	0.974532	UP
hsa-miR-185-3p	5.65864	12.3705	2.18612	1.12837	0.393641	UP	LILRA6,LILRB2,LILRB3	0.0488278	0.490187	3.32756	0.974532	UP
hsa-miR-185-3p	5.65864	12.3705	2.18612	1.12837	0.393641	UP	LILRA6,LILRB2,LILRB3	0.0488278	0.490187	3.32756	0.974532	UP
hsa-miR-185-3p	5.65864	12.3705	2.18612	1.12837	0.393641	UP	LILRA6,LILRB2,LILRB3	0.0488278	0.490187	3.32756	0.974532	UP
hsa-miR-185-3p	5.65864	12.3705	2.18612	1.12837	0.393641	UP	LILRA6,LILRB2,LILRB3	0.0488278	0.490187	3.32756	0.974532	UP
hsa-miR-185-3p	5.65864	12.3705	2.18612	1.12837	0.393641	UP	LILRA6,LILRB2,LILRB3	0.0488278	0.490187	3.32756	0.974532	UP
hsa-miR-185-3p	5.65864	12.3705	2.18612	1.12837	0.393641	UP	LILRA6,LILRB2,LILRB3	0.0488278	0.490187	3.32756	0.974532	UP
hsa-miR-185-3p	5.65864	12.3705	2.18612	1.12837	0.393641	UP	LILRA6,LILRB2,LILRB3	0.0488278	0.490187	3.32756	0.974532	UP
hsa-miR-185-3p	5.65864	12.3705	2.18612	1.12837	0.393641	UP	LILRA6,LILRB2,LILRB3	0.0488278	0.490187	3.32756	0.974532	UP
hsa-miR-185-3p	5.65864	12.3705	2.18612	1.12837	0.393641	UP	LILRA6,LILRB2,LILRB3	0.0488278	0.490187	3.32756	0.974532	UP
hsa-miR-185-3p	5.65864	12.3705	2.18612	1.12837	0.393641	UP	LILRA6,LILRB2,LILRB3	0.0488278	0.490187	3.32756	0.974532	UP
hsa-miR-185-3p	5.65864	12.3705	2.18612	1.12837	0.393641	UP	LILRA6,LILRB2,LILRB3	0.0488278	0.490187	3.32756	0.974532	UP
hsa-miR-3180-3p	10.1856	13.2541	1.30126	0.379909	0.813853	NEUTRAL	LILRA6,LILRB2,LILRB3	0.0488278	0.490187	3.32756	0.974532	UP
hsa-miR-3180-3p	10.1856	13.2541	1.30126	0.379909	0.813853	NEUTRAL	LILRA6,LILRB2,LILRB3	0.0488278	0.490187	3.32756	0.974532	UP
hsa-miR-3180-3p	10.1856	13.2541	1.30126	0.379909	0.813853	NEUTRAL	LILRA6,LILRB2,LILRB3	0.0488278	0.490187	3.32756	0.974532	UP
hsa-miR-3180-3p	10.1856	13.2541	1.30126	0.379909	0.813853	NEUTRAL	LILRA6,LILRB2,LILRB3	0.0488278	0.490187	3.32756	0.974532	UP
hsa-miR-487a-3p	136.939	163.467	1.19372	0.255462	0.758671	NEUTRAL	LILRA6,LILRB2,LILRB3	0.0488278	0.490187	3.32756	0.974532	UP
hsa-miR-487a-3p	136.939	163.467	1.19372	0.255462	0.758671	NEUTRAL	LILRA6,LILRB2,LILRB3	0.0488278	0.490187	3.32756	0.974532	UP
hsa-miR-486-5p	470.799	459.474	0.975945	-0.0351284	0.96644	NEUTRAL	LILRA6,LILRB2,LILRB3	0.0488278	0.490187	3.32756	0.974532	UP
hsa-miR-486-5p	470.799	459.474	0.975945	-0.0351284	0.96644	NEUTRAL	LILRA6,LILRB2,LILRB3	0.0488278	0.490187	3.32756	0.974532	UP
hsa-miR-486-5p	470.799	459.474	0.975945	-0.0351284	0.96644	NEUTRAL	LILRA6,LILRB2,LILRB3	0.0488278	0.490187	3.32756	0.974532	UP
hsa-miR-486-5p	470.799	459.474	0.975945	-0.0351284	0.96644	NEUTRAL	LILRA6,LILRB2,LILRB3	0.0488278	0.490187	3.32756	0.974532	UP
hsa-miR-486-5p	470.799	459.474	0.975945	-0.0351284	0.96644	NEUTRAL	LILRA6,LILRB2,LILRB3	0.0488278	0.490187	3.32756	0.974532	UP
hsa-miR-486-5p	470.799	459.474	0.975945	-0.0351284	0.96644	NEUTRAL	LILRA6,LILRB2,LILRB3	0.0488278	0.490187	3.32756	0.974532	UP
hsa-miR-486-5p	470.799	459.474	0.975945	-0.0351284	0.96644	NEUTRAL	LILRA6,LILRB2,LILRB3	0.0488278	0.490187	3.32756	0.974532	UP
hsa-miR-486-5p	470.799	459.474	0.975945	-0.0351284	0.96644	NEUTRAL	LILRA6,LILRB2,LILRB3	0.0488278	0.490187	3.32756	0.974532	UP
hsa-miR-486-5p	470.799	459.474	0.975945	-0.0351284	0.96644	NEUTRAL	LILRA6,LILRB2,LILRB3	0.0488278	0.490187	3.32756	0.974532	UP
hsa-miR-486-5p	470.799	459.474	0.975945	-0.0351284	0.96644	NEUTRAL	LILRA6,LILRB2,LILRB3	0.0488278	0.490187	3.32756	0.974532	UP
hsa-miR-486-5p	470.799	459.474	0.975945	-0.0351284	0.96644	NEUTRAL	LILRA6,LILRB2,LILRB3	0.0488278	0.490187	3.32756	0.974532	UP
hsa-miR-486-5p	470.799	459.474	0.975945	-0.0351284	0.96644	NEUTRAL	LILRA6,LILRB2,LILRB3	0.0488278	0.490187	3.32756	0.974532	UP
hsa-miR-486-5p	470.799	459.474	0.975945	-0.0351284	0.96644	NEUTRAL	LILRA6,LILRB2,LILRB3	0.0488278	0.490187	3.32756	0.974532	UP
hsa-miR-486-5p	470.799	459.474	0.975945	-0.0351284	0.96644	NEUTRAL	LILRA6,LILRB2,LILRB3	0.0488278	0.490187	3.32756	0.974532	UP
hsa-miR-486-5p	470.799	459.474	0.975945	-0.0351284	0.96644	NEUTRAL	LILRA6,LILRB2,LILRB3	0.0488278	0.490187	3.32756	0.974532	UP
hsa-miR-486-5p	470.799	459.474	0.975945	-0.0351284	0.96644	NEUTRAL	LILRA6,LILRB2,LILRB3	0.0488278	0.490187	3.32756	0.974532	UP
hsa-miR-486-5p	470.799	459.474	0.975945	-0.0351284	0.96644	NEUTRAL	LILRA6,LILRB2,LILRB3	0.0488278	0.490187	3.32756	0.974532	UP
hsa-miR-486-5p	470.799	459.474	0.975945	-0.0351284	0.96644	NEUTRAL	LILRA6,LILRB2,LILRB3	0.0488278	0.490187	3.32756	0.974532	UP
hsa-miR-486-5p	470.799	459.474	0.975945	-0.0351284	0.96644	NEUTRAL	LILRA6,LILRB2,LILRB3	0.0488278	0.490187	3.32756	0.974532	UP
hsa-miR-486-5p	470.799	459.474	0.975945	-0.0351284	0.96644	NEUTRAL	LILRA6,LILRB2,LILRB3	0.0488278	0.490187	3.32756	0.974532	UP
hsa-miR-486-5p	470.799	459.474	0.975945	-0.0351284	0.96644	NEUTRAL	LILRA6,LILRB2,LILRB3	0.0488278	0.490187	3.32756	0.974532	UP
hsa-miR-486-5p	470.799	459.474	0.975945	-0.0351284	0.96644	NEUTRAL	LILRA6,LILRB2,LILRB3	0.0488278	0.490187	3.32756	0.974532	UP
hsa-miR-486-5p	470.799	459.474	0.975945	-0.0351284	0.96644	NEUTRAL	LILRA6,LILRB2,LILRB3	0.0488278	0.490187	3.32756	0.974532	UP
hsa-miR-486-5p	470.799	459.474	0.975945	-0.0351284	0.96644	NEUTRAL	LILRA6,LILRB2,LILRB3	0.0488278	0.490187	3.32756	0.974532	UP
hsa-miR-486-5p	470.799	459.474	0.975945	-0.0351284	0.96644	NEUTRAL	LILRA6,LILRB2,LILRB3	0.0488278	0.490187	3.32756	0.974532	UP
hsa-miR-486-5p	470.799	459.474	0.975945	-0.0351284	0.96644	NEUTRAL	LILRA6,LILRB2,LILRB3	0.0488278	0.490187	3.32756	0.974532	UP
hsa-miR-486-5p	470.799	459.474	0.975945	-0.0351284	0.96644	NEUTRAL	LILRA6,LILRB2,LILRB3	0.0488278	0.490187	3.32756	0.974532	UP
hsa-miR-486-5p	470.799	459.474	0.975945	-0.0351284	0.96644	NEUTRAL	LILRA6,LILRB2,LILRB3	0.0488278	0.490187	3.32756	0.974532	UP
hsa-miR-486-5p	470.799	459.474	0.975945	-0.0351284	0.96644	NEUTRAL	LILRA6,LILRB2,LILRB3	0.0488278	0.490187	3.32756	0.974532	UP
hsa-miR-486-5p	470.799	459.474	0.975945	-0.0351284	0.96644	NEUTRAL	LILRA6,LILRB2,LILRB3	0.0488278	0.490187	3.32756	0.974532	UP
hsa-miR-486-5p	470.799	459.474	0.975945	-0.0351284	0.96644	NEUTRAL	LILRA6,LILRB2,LILRB3	0.0488278	0.490187	3.32756	0.974532	UP
hsa-miR-486-5p	470.799	459.474	0.975945	-0.0351284	0.96644	NEUTRAL	LILRA6,LILRB2,LILRB3	0.0488278	0.490187	3.32756	0.974532	UP
hsa-miR-486-5p	470.799	459.474	0.975945	-0.0351284	0.96644	NEUTRAL	LILRA6,LILRB2,LILRB3	0.0488278	0.490187	3.32756	0.974532	UP
hsa-miR-486-5p	470.799	459.474	0.975945	-0.0351284	0.96644	NEUTRAL	LILRA6,LILRB2,LILRB3	0.0488278	0.490187	3.32756	0.974532	UP
hsa-miR-486-5p	470.799	459.474	0.975945	-0.0351284	0.96644	NEUTRAL	LILRA6,LILRB2,LILRB3	0.0488278	0.490187	3.32756	0.974532	UP
hsa-miR-486-5p	470.799	459.474	0.975945	-0.0351284	0.96644	NEUTRAL	LILRA6,LILRB2,LILRB3	0.0488278	0.490187	3.32756	0.974532	UP
hsa-miR-486-5p	470.799	459.474	0.975945	-0.0351284	0.96644	NEUTRAL	LILRA6,LILRB2,LILRB3	0.0488278	0.490187	3.32756	0.974532	UP
hsa-miR-486-5p	470.799	459.474	0.975945	-0.0351284	0.96644	NEUTRAL	LILRA6,LILRB2,LILRB3	0.0488278	0.490187	3.32756	0.974532	UP
hsa-miR-486-5p	470.799	459.474	0.975945	-0.0351284	0.96644	NEUTRAL	LILRA6,LILRB2,LILRB3	0.0488278	0.490187	3.32756	0.974532	UP
hsa-miR-486-5p	470.799	459.474	0.975945	-0.0351284	0.96644	NEUTRAL	LILRA6,LILRB2,LILRB3	0.0488278	0.490187	3.32756	0.974532	UP
hsa-miR-486-5p	470.799	459.474	0.975945	-0.0351284	0.96644	NEUTRAL	LILRA6,LILRB2,LILRB3	0.0488278	0.490187	3.32756	0.974532	UP
hsa-miR-486-5p	470.799	459.474	0.975945	-0.0351284	0.96644	NEUTRAL	LILRA6,LILRB2,LILRB3	0.0488278	0.490187	3.32756	0.974532	UP
hsa-miR-486-5p	470.799	459.474	0.975945	-0.0351284	0.96644	NEUTRAL	LILRA6,LILRB2,LILRB3	0.0488278	0.490187	3.32756	0.974532	UP
hsa-miR-486-5p	470.799	459.474	0.975945	-0.0351284	0.96644	NEUTRAL	LILRA6,LILRB2,LILRB3	0.0488278	0.490187	3.32756	0.974532	UP
hsa-miR-486-5p	470.799	459.474	0.975945	-0.0351284	0.96644	NEUTRAL	LILRA6,LILRB2,LILRB3	0.0488278	0.490187	3.32756	0.974532	UP
hsa-miR-486-5p	470.799	459.474	0.975945	-0.0351284	0.96644	NEUTRAL	LILRA6,LILRB2,LILRB3	0.0488278	0.490187	3.32756	0.974532	UP
hsa-miR-486-5p	470.799	459.474	0.975945	-0.0351284	0.96644	NEUTRAL	LILRA6,LILRB2,LILRB3	0.0488278	0.490187	3.32756	0.974532	UP
hsa-miR-486-5p	470.799	459.474	0.975945	-0.0351284	0.96644	NEUTRAL	LILRA6,LILRB2,LILRB3	0.0488278	0.490187	3.32756	0.974532	UP
hsa-miR-486-5p	470.799	459.474	0.975945	-0.0351284	0.96644	NEUTRAL	LILRA6,LILRB2,LILRB3	0.0488278	0.490187	3.32756	0.974532	UP
hsa-miR-486-5p	470.799	459.474	0.975945	-0.0351284	0.96644	NEUTRAL	LILRA6,LILRB2,LILRB3	0.0488278	0.490187	3.32756	0.974532	UP
hsa-miR-486-5p	470.799	459.474	0.975945	-0.0351284	0.96644	NEUTRAL	LILRA6,LILRB2,LILRB3	0.0488278	0.490187	3.32756	0.974532	UP
hsa-miR-486-5p	470.799	459.474	0.975945	-0.0351284	0.96644	NEUTRAL	LILRA6,LILRB2,LILRB3	0.0488278	0.490187	3.32756	0.974532	UP
hsa-miR-486-5p	470.799	459.474	0.975945	-0.0351284	0.96644	NEUTRAL	LILRA6,LILRB2,LILRB3	0.0488278	0.490187	3.32756	0.974532	UP
hsa-miR-486-5p	470.799	459.474	0.975945	-0.0351284	0.96644	NEUTRAL	LILRA6,LILRB2,LILRB3	0.0488278	0.490187	3.32756	0.974532	UP
hsa-miR-486-5p	470.799	459.474	0.975945	-0.0351284	0.96644	NEUTRAL	LILRA6,LILRB2,LILRB3	0.0488278	0.490187	3.32756	0.974532	UP
hsa-miR-486-5p	470.799	459.474	0.975945	-0.0351284	0.96644	NEUTRAL	LILRA6,LILRB2,LILRB3	0.0488278	0.490187	3.32756	0.974532	UP
hsa-miR-486-5p	470.799	459.474	0.975945	-0.0351284	0.96644	NEUTRAL	LILRA6,LILRB2,LILRB3	0.0488278	0.490187	3.32756	0.974532	UP
hsa-miR-486-5p	470.799	459.474	0.975945	-0.0351284	0.96644	NEUTRAL	LILRA6,LILRB2,LILRB3	0.0488278	0.490187	3.32756	0.974532	UP
hsa-miR-486-5p	470.799	459.474	0.975945	-0.0351284	0.96644	NEUTRAL	LILRA6,LILRB2,LILRB3	0.0488278	0.490187	3.32756	0.974532	UP
hsa-miR-665	33.9519	32.6933	0.962932	-0.0544937	0.990546	NEUTRAL	LILRA6,LILRB2,LILRB3	0.0488278	0.490187	3.32756	0.974532	UP
hsa-miR-665	33.9519	32.6933	0.962932	-0.0544937	0.990546	NEUTRAL	LILRA6,LILRB2,LILRB3	0.0488278	0.490187	3.32756	0.974532	UP
hsa-miR-665	33.9519	32.6933	0.962932	-0.0544937	0.990546	NEUTRAL	LILRA6,LILRB2,LILRB3	0.0488278	0.490187	3.32756	0.974532	UP
hsa-miR-296-5p	15.8442	13.2541	0.836524	-0.257521	0.879313	NEUTRAL	LILRA6,LILRB2,LILRB3	0.0488278	0.490187	3.32756	0.974532	UP
hsa-miR-296-5p	15.8442	13.2541	0.836524	-0.257521	0.879313	NEUTRAL	LILRA6,LILRB2,LILRB3	0.0488278	0.490187	3.32756	0.974532	UP
hsa-miR-296-5p	15.8442	13.2541	0.836524	-0.257521	0.879313	NEUTRAL	LILRA6,LILRB2,LILRB3	0.0488278	0.490187	3.32756	0.974532	UP
hsa-miR-370-5p	12.449	8.83604	0.709778	-0.49456	0.736219	NEUTRAL	LILRA6,LILRB2,LILRB3	0.0488278	0.490187	3.32756	0.974532	UP
hsa-miR-370-5p	12.449	8.83604	0.709778	-0.49456	0.736219	NEUTRAL	LILRA6,LILRB2,LILRB3	0.0488278	0.490187	3.32756	0.974532	UP
hsa-miR-370-5p	12.449	8.83604	0.709778	-0.49456	0.736219	NEUTRAL	LILRA6,LILRB2,LILRB3	0.0488278	0.490187	3.32756	0.974532	UP
hsa-miR-370-5p	12.449	8.83604	0.709778	-0.49456	0.736219	NEUTRAL	LILRA6,LILRB2,LILRB3	0.0488278	0.490187	3.32756	0.974532	UP
hsa-miR-370-5p	12.449	8.83604	0.709778	-0.49456	0.736219	NEUTRAL	LILRA6,LILRB2,LILRB3	0.0488278	0.490187	3.32756	0.974532	UP
hsa-miR-185-3p	5.65864	12.3705	2.18612	1.12837	0.393641	UP	ESPNL	0.0532215	0.462767	3.12021	0.99965	UP
hsa-miR-185-3p	5.65864	12.3705	2.18612	1.12837	0.393641	UP	ESPNL	0.0532215	0.462767	3.12021	0.99965	UP
hsa-miR-185-3p	5.65864	12.3705	2.18612	1.12837	0.393641	UP	ESPNL	0.0532215	0.462767	3.12021	0.99965	UP
hsa-miR-431-3p	66.772	68.9211	1.03219	0.0457027	0.97798	NEUTRAL	ESPNL	0.0532215	0.462767	3.12021	0.99965	UP
hsa-miR-431-3p	66.772	68.9211	1.03219	0.0457027	0.97798	NEUTRAL	ESPNL	0.0532215	0.462767	3.12021	0.99965	UP
hsa-miR-431-3p	66.772	68.9211	1.03219	0.0457027	0.97798	NEUTRAL	ESPNL	0.0532215	0.462767	3.12021	0.99965	UP
hsa-miR-431-3p	66.772	68.9211	1.03219	0.0457027	0.97798	NEUTRAL	ESPNL	0.0532215	0.462767	3.12021	0.99965	UP
hsa-miR-431-3p	66.772	68.9211	1.03219	0.0457027	0.97798	NEUTRAL	ESPNL	0.0532215	0.462767	3.12021	0.99965	UP
hsa-miR-370-3p	169.759	161.7	0.952522	-0.0701753	0.937972	NEUTRAL	ESPNL	0.0532215	0.462767	3.12021	0.99965	UP
hsa-miR-370-3p	169.759	161.7	0.952522	-0.0701753	0.937972	NEUTRAL	ESPNL	0.0532215	0.462767	3.12021	0.99965	UP
hsa-miR-370-3p	169.759	161.7	0.952522	-0.0701753	0.937972	NEUTRAL	ESPNL	0.0532215	0.462767	3.12021	0.99965	UP
hsa-miR-370-3p	169.759	161.7	0.952522	-0.0701753	0.937972	NEUTRAL	ESPNL	0.0532215	0.462767	3.12021	0.99965	UP
hsa-miR-370-3p	169.759	161.7	0.952522	-0.0701753	0.937972	NEUTRAL	ESPNL	0.0532215	0.462767	3.12021	0.99965	UP
hsa-miR-744-5p	823.899	698.931	0.848321	-0.237317	0.756018	NEUTRAL	ESPNL	0.0532215	0.462767	3.12021	0.99965	UP
hsa-miR-744-5p	823.899	698.931	0.848321	-0.237317	0.756018	NEUTRAL	ESPNL	0.0532215	0.462767	3.12021	0.99965	UP
hsa-miR-744-5p	823.899	698.931	0.848321	-0.237317	0.756018	NEUTRAL	ESPNL	0.0532215	0.462767	3.12021	0.99965	UP
hsa-miR-744-5p	823.899	698.931	0.848321	-0.237317	0.756018	NEUTRAL	ESPNL	0.0532215	0.462767	3.12021	0.99965	UP
hsa-miR-744-5p	823.899	698.931	0.848321	-0.237317	0.756018	NEUTRAL	ESPNL	0.0532215	0.462767	3.12021	0.99965	UP
hsa-miR-339-3p	837.479	635.311	0.758599	-0.39859	0.601644	NEUTRAL	ESPNL	0.0532215	0.462767	3.12021	0.99965	UP
hsa-miR-339-3p	837.479	635.311	0.758599	-0.39859	0.601644	NEUTRAL	ESPNL	0.0532215	0.462767	3.12021	0.99965	UP
hsa-miR-339-3p	837.479	635.311	0.758599	-0.39859	0.601644	NEUTRAL	ESPNL	0.0532215	0.462767	3.12021	0.99965	UP
hsa-miR-5787	12.449	3068.76	246.506	7.94548	1.13133e-14	UP	SLC12A5	0.0809247	0.52522	2.69827	0.99965	UP
hsa-miR-766-3p	12.449	16.7885	1.34858	0.431439	0.754984	NEUTRAL	SLC12A5	0.0809247	0.52522	2.69827	0.99965	UP
hsa-miR-766-3p	12.449	16.7885	1.34858	0.431439	0.754984	NEUTRAL	SLC12A5	0.0809247	0.52522	2.69827	0.99965	UP
hsa-miR-766-3p	12.449	16.7885	1.34858	0.431439	0.754984	NEUTRAL	SLC12A5	0.0809247	0.52522	2.69827	0.99965	UP
hsa-miR-766-3p	12.449	16.7885	1.34858	0.431439	0.754984	NEUTRAL	SLC12A5	0.0809247	0.52522	2.69827	0.99965	UP
hsa-miR-3180-3p	10.1856	13.2541	1.30126	0.379909	0.813853	NEUTRAL	SLC12A5	0.0809247	0.52522	2.69827	0.99965	UP
hsa-miR-3180-3p	10.1856	13.2541	1.30126	0.379909	0.813853	NEUTRAL	SLC12A5	0.0809247	0.52522	2.69827	0.99965	UP
hsa-miR-3180-3p	10.1856	13.2541	1.30126	0.379909	0.813853	NEUTRAL	SLC12A5	0.0809247	0.52522	2.69827	0.99965	UP
hsa-miR-1285-3p	115.436	132.541	1.14817	0.199337	0.816678	NEUTRAL	SLC12A5	0.0809247	0.52522	2.69827	0.99965	UP
hsa-miR-193b-5p	27.1615	30.9261	1.1386	0.187264	0.886974	NEUTRAL	SLC12A5	0.0809247	0.52522	2.69827	0.99965	UP
hsa-miR-744-5p	823.899	698.931	0.848321	-0.237317	0.756018	NEUTRAL	SLC12A5	0.0809247	0.52522	2.69827	0.99965	UP
hsa-miR-744-5p	823.899	698.931	0.848321	-0.237317	0.756018	NEUTRAL	SLC12A5	0.0809247	0.52522	2.69827	0.99965	UP
hsa-miR-744-5p	823.899	698.931	0.848321	-0.237317	0.756018	NEUTRAL	SLC12A5	0.0809247	0.52522	2.69827	0.99965	UP
hsa-miR-34a-5p	1668.17	2292.95	1.37453	0.458942	0.5311	NEUTRAL	POM121B	0.0752602	0.453338	2.59063	0.99965	UP
hsa-miR-1285-3p	115.436	132.541	1.14817	0.199337	0.816678	NEUTRAL	GABRB3	0.0911471	0.505666	2.47192	0.99965	UP
hsa-miR-370-3p	169.759	161.7	0.952522	-0.0701753	0.937972	NEUTRAL	GABRB3	0.0911471	0.505666	2.47192	0.99965	UP
hsa-miR-3180-3p	10.1856	13.2541	1.30126	0.379909	0.813853	NEUTRAL	RP11-834C11.7	0.0781107	0.428434	2.45548	0.99965	UP
hsa-miR-5100	24.898	0.883604	0.0354889	-4.81649	0.00187013	DOWN	RP11-834C11.7	0.0781107	0.428434	2.45548	0.99965	UP
hsa-miR-210-5p	332.728	350.791	1.05429	0.0762664	0.926502	NEUTRAL	MT3	0.125461	0.66589	2.40804	0.99965	UP
hsa-miR-127-5p	275.01	384.368	1.39765	0.483003	0.538909	NEUTRAL	PKIB	0.111959	0.582954	2.38041	0.99965	UP
hsa-miR-127-5p	275.01	384.368	1.39765	0.483003	0.538909	NEUTRAL	PKIB	0.111959	0.582954	2.38041	0.99965	UP
hsa-miR-339-5p	38.4788	199.694	5.18973	2.37566	0.00610349	UP	PRSS36	0.118867	0.60734	2.35316	0.99965	UP
hsa-miR-3176	13.5807	32.6933	2.40733	1.26743	0.238661	UP	PRSS36	0.118867	0.60734	2.35316	0.99965	UP
hsa-miR-3176	13.5807	32.6933	2.40733	1.26743	0.238661	UP	PRSS36	0.118867	0.60734	2.35316	0.99965	UP
hsa-miR-3176	13.5807	32.6933	2.40733	1.26743	0.238661	UP	PRSS36	0.118867	0.60734	2.35316	0.99965	UP
hsa-miR-3176	13.5807	32.6933	2.40733	1.26743	0.238661	UP	PRSS36	0.118867	0.60734	2.35316	0.99965	UP
hsa-miR-1228-3p	5.65864	8.83604	1.56151	0.642944	0.697161	NEUTRAL	PRSS36	0.118867	0.60734	2.35316	0.99965	UP
hsa-miR-1228-3p	5.65864	8.83604	1.56151	0.642944	0.697161	NEUTRAL	PRSS36	0.118867	0.60734	2.35316	0.99965	UP
hsa-miR-1228-3p	5.65864	8.83604	1.56151	0.642944	0.697161	NEUTRAL	PRSS36	0.118867	0.60734	2.35316	0.99965	UP
hsa-miR-1228-3p	5.65864	8.83604	1.56151	0.642944	0.697161	NEUTRAL	PRSS36	0.118867	0.60734	2.35316	0.99965	UP
hsa-miR-2277-5p	35.0836	47.7146	1.36003	0.443635	0.654588	NEUTRAL	PRSS36	0.118867	0.60734	2.35316	0.99965	UP
hsa-miR-2277-5p	35.0836	47.7146	1.36003	0.443635	0.654588	NEUTRAL	PRSS36	0.118867	0.60734	2.35316	0.99965	UP
hsa-miR-2277-5p	35.0836	47.7146	1.36003	0.443635	0.654588	NEUTRAL	PRSS36	0.118867	0.60734	2.35316	0.99965	UP
hsa-miR-2277-5p	35.0836	47.7146	1.36003	0.443635	0.654588	NEUTRAL	PRSS36	0.118867	0.60734	2.35316	0.99965	UP
hsa-miR-2277-5p	35.0836	47.7146	1.36003	0.443635	0.654588	NEUTRAL	PRSS36	0.118867	0.60734	2.35316	0.99965	UP
hsa-miR-766-3p	12.449	16.7885	1.34858	0.431439	0.754984	NEUTRAL	PRSS36	0.118867	0.60734	2.35316	0.99965	UP
hsa-miR-210-5p	332.728	350.791	1.05429	0.0762664	0.926502	NEUTRAL	PRSS36	0.118867	0.60734	2.35316	0.99965	UP
hsa-miR-210-5p	332.728	350.791	1.05429	0.0762664	0.926502	NEUTRAL	PRSS36	0.118867	0.60734	2.35316	0.99965	UP
hsa-miR-210-5p	332.728	350.791	1.05429	0.0762664	0.926502	NEUTRAL	PRSS36	0.118867	0.60734	2.35316	0.99965	UP
hsa-miR-210-5p	332.728	350.791	1.05429	0.0762664	0.926502	NEUTRAL	PRSS36	0.118867	0.60734	2.35316	0.99965	UP
hsa-miR-210-5p	332.728	350.791	1.05429	0.0762664	0.926502	NEUTRAL	PRSS36	0.118867	0.60734	2.35316	0.99965	UP
hsa-miR-23a-5p	107.514	106.916	0.994436	-0.00804886	1	NEUTRAL	PRSS36	0.118867	0.60734	2.35316	0.99965	UP
hsa-miR-23a-5p	107.514	106.916	0.994436	-0.00804886	1	NEUTRAL	PRSS36	0.118867	0.60734	2.35316	0.99965	UP
hsa-miR-23a-5p	107.514	106.916	0.994436	-0.00804886	1	NEUTRAL	PRSS36	0.118867	0.60734	2.35316	0.99965	UP
hsa-miR-23a-5p	107.514	106.916	0.994436	-0.00804886	1	NEUTRAL	PRSS36	0.118867	0.60734	2.35316	0.99965	UP
hsa-miR-766-3p	12.449	16.7885	1.34858	0.431439	0.754984	NEUTRAL	C2orf72	0.103057	0.480986	2.22255	0.99965	UP
hsa-miR-484	1291.3	1132.78	0.877238	-0.188959	0.800823	NEUTRAL	C2orf72	0.103057	0.480986	2.22255	0.99965	UP
hsa-miR-4497	804.659	299.542	0.372259	-1.42562	0.0683607	DOWN	C2orf72	0.103057	0.480986	2.22255	0.99965	UP
hsa-miR-2277-5p	35.0836	47.7146	1.36003	0.443635	0.654588	NEUTRAL	BX842568.4	0.107813	0.492449	2.19144	0.99965	UP
hsa-miR-940	5.65864	13.2541	2.34227	1.22791	0.344393	UP	SAMD11	0.299379	1.36728	2.19126	0.99965	UP
hsa-miR-940	5.65864	13.2541	2.34227	1.22791	0.344393	UP	SAMD11	0.299379	1.36728	2.19126	0.99965	UP
hsa-miR-940	5.65864	13.2541	2.34227	1.22791	0.344393	UP	SAMD11	0.299379	1.36728	2.19126	0.99965	UP
hsa-miR-940	5.65864	13.2541	2.34227	1.22791	0.344393	UP	SAMD11	0.299379	1.36728	2.19126	0.99965	UP
hsa-miR-940	5.65864	13.2541	2.34227	1.22791	0.344393	UP	SAMD11	0.299379	1.36728	2.19126	0.99965	UP
hsa-miR-940	5.65864	13.2541	2.34227	1.22791	0.344393	UP	SAMD11	0.299379	1.36728	2.19126	0.99965	UP
hsa-miR-940	5.65864	13.2541	2.34227	1.22791	0.344393	UP	SAMD11	0.299379	1.36728	2.19126	0.99965	UP
hsa-miR-940	5.65864	13.2541	2.34227	1.22791	0.344393	UP	SAMD11	0.299379	1.36728	2.19126	0.99965	UP
hsa-miR-940	5.65864	13.2541	2.34227	1.22791	0.344393	UP	SAMD11	0.299379	1.36728	2.19126	0.99965	UP
hsa-miR-940	5.65864	13.2541	2.34227	1.22791	0.344393	UP	SAMD11	0.299379	1.36728	2.19126	0.99965	UP
hsa-miR-940	5.65864	13.2541	2.34227	1.22791	0.344393	UP	SAMD11	0.299379	1.36728	2.19126	0.99965	UP
hsa-miR-940	5.65864	13.2541	2.34227	1.22791	0.344393	UP	SAMD11	0.299379	1.36728	2.19126	0.99965	UP
hsa-miR-940	5.65864	13.2541	2.34227	1.22791	0.344393	UP	SAMD11	0.299379	1.36728	2.19126	0.99965	UP
hsa-miR-3180-3p	10.1856	13.2541	1.30126	0.379909	0.813853	NEUTRAL	SAMD11	0.299379	1.36728	2.19126	0.99965	UP
hsa-miR-3180-3p	10.1856	13.2541	1.30126	0.379909	0.813853	NEUTRAL	SAMD11	0.299379	1.36728	2.19126	0.99965	UP
hsa-miR-3180-3p	10.1856	13.2541	1.30126	0.379909	0.813853	NEUTRAL	SAMD11	0.299379	1.36728	2.19126	0.99965	UP
hsa-miR-3180-3p	10.1856	13.2541	1.30126	0.379909	0.813853	NEUTRAL	SAMD11	0.299379	1.36728	2.19126	0.99965	UP
hsa-miR-3180-3p	10.1856	13.2541	1.30126	0.379909	0.813853	NEUTRAL	SAMD11	0.299379	1.36728	2.19126	0.99965	UP
hsa-miR-3180-3p	10.1856	13.2541	1.30126	0.379909	0.813853	NEUTRAL	SAMD11	0.299379	1.36728	2.19126	0.99965	UP
hsa-miR-3180-3p	10.1856	13.2541	1.30126	0.379909	0.813853	NEUTRAL	SAMD11	0.299379	1.36728	2.19126	0.99965	UP
hsa-miR-3180-3p	10.1856	13.2541	1.30126	0.379909	0.813853	NEUTRAL	SAMD11	0.299379	1.36728	2.19126	0.99965	UP
hsa-miR-5787	12.449	3068.76	246.506	7.94548	1.13133e-14	UP	CRACR2B	0.180599	0.816564	2.17678	0.99965	UP
hsa-miR-1307-3p	224.082	332.235	1.48265	0.568176	0.472159	NEUTRAL	CRACR2B	0.180599	0.816564	2.17678	0.99965	UP
hsa-miR-1307-3p	224.082	332.235	1.48265	0.568176	0.472159	NEUTRAL	CRACR2B	0.180599	0.816564	2.17678	0.99965	UP
hsa-miR-1307-3p	224.082	332.235	1.48265	0.568176	0.472159	NEUTRAL	CRACR2B	0.180599	0.816564	2.17678	0.99965	UP
hsa-miR-1307-3p	224.082	332.235	1.48265	0.568176	0.472159	NEUTRAL	CRACR2B	0.180599	0.816564	2.17678	0.99965	UP
hsa-miR-1307-3p	224.082	332.235	1.48265	0.568176	0.472159	NEUTRAL	CRACR2B	0.180599	0.816564	2.17678	0.99965	UP
hsa-miR-1307-3p	224.082	332.235	1.48265	0.568176	0.472159	NEUTRAL	CRACR2B	0.180599	0.816564	2.17678	0.99965	UP
hsa-miR-3180-3p	10.1856	13.2541	1.30126	0.379909	0.813853	NEUTRAL	CRACR2B	0.180599	0.816564	2.17678	0.99965	UP
hsa-miR-3180-3p	10.1856	13.2541	1.30126	0.379909	0.813853	NEUTRAL	CRACR2B	0.180599	0.816564	2.17678	0.99965	UP
hsa-miR-4488	3153	1214.07	0.385053	-1.37687	0.0624724	DOWN	CRACR2B	0.180599	0.816564	2.17678	0.99965	UP
hsa-miR-4488	3153	1214.07	0.385053	-1.37687	0.0624724	DOWN	CRACR2B	0.180599	0.816564	2.17678	0.99965	UP
hsa-miR-4488	3153	1214.07	0.385053	-1.37687	0.0624724	DOWN	CRACR2B	0.180599	0.816564	2.17678	0.99965	UP
hsa-miR-3960	12.449	0.883604	0.0709778	-3.81649	0.016522	DOWN	CRACR2B	0.180599	0.816564	2.17678	0.99965	UP
hsa-miR-3960	12.449	0.883604	0.0709778	-3.81649	0.016522	DOWN	CRACR2B	0.180599	0.816564	2.17678	0.99965	UP
hsa-miR-185-5p	36.2153	86.5932	2.39107	1.25765	0.161727	UP	STAB2	0.186785	0.785707	2.07261	0.99965	UP
hsa-miR-874-5p	14.7125	30.0425	2.04198	1.02997	0.342866	UP	STAB2	0.186785	0.785707	2.07261	0.99965	UP
hsa-miR-431-3p	66.772	68.9211	1.03219	0.0457027	0.97798	NEUTRAL	STAB2	0.186785	0.785707	2.07261	0.99965	UP
hsa-miR-146b-3p	18.1077	3.53442	0.195189	-2.35706	0.0605725	DOWN	STAB2	0.186785	0.785707	2.07261	0.99965	UP
hsa-miR-671-5p	56.5864	116.636	2.0612	1.04348	0.222883	UP	GLYATL1	0.116166	0.488407	2.0719	0.99965	UP
hsa-miR-671-5p	56.5864	116.636	2.0612	1.04348	0.222883	UP	GLYATL1	0.116166	0.488407	2.0719	0.99965	UP
hsa-miR-27a-3p	10935.9	12531.3	1.14588	0.196461	0.76527	NEUTRAL	GLYATL1	0.116166	0.488407	2.0719	0.99965	UP
hsa-miR-665	33.9519	32.6933	0.962932	-0.0544937	0.990546	NEUTRAL	GLYATL1	0.116166	0.488407	2.0719	0.99965	UP
hsa-miR-3960	12.449	0.883604	0.0709778	-3.81649	0.016522	DOWN	GLYATL1	0.116166	0.488407	2.0719	0.99965	UP
hsa-miR-21-3p	24766.8	27517.2	1.11105	0.151929	0.805947	NEUTRAL	HNRNPA1P49	0.177517	0.728892	2.03775	0.99965	UP
hsa-miR-1285-3p	115.436	132.541	1.14817	0.199337	0.816678	NEUTRAL	BPI	0.217346	0.859734	1.9839	0.99965	UP
hsa-miR-1285-3p	115.436	132.541	1.14817	0.199337	0.816678	NEUTRAL	BPI	0.217346	0.859734	1.9839	0.99965	UP
hsa-miR-654-5p	44.1374	49.4818	1.12109	0.164896	0.881604	NEUTRAL	BPI	0.217346	0.859734	1.9839	0.99965	UP
hsa-miR-654-5p	44.1374	49.4818	1.12109	0.164896	0.881604	NEUTRAL	BPI	0.217346	0.859734	1.9839	0.99965	UP
hsa-miR-654-5p	44.1374	49.4818	1.12109	0.164896	0.881604	NEUTRAL	BPI	0.217346	0.859734	1.9839	0.99965	UP
hsa-miR-671-5p	56.5864	116.636	2.0612	1.04348	0.222883	UP	COL22A1	0.103783	0.391261	1.91455	0.99965	UP
hsa-miR-671-5p	56.5864	116.636	2.0612	1.04348	0.222883	UP	COL22A1	0.103783	0.391261	1.91455	0.99965	UP
hsa-miR-671-5p	56.5864	116.636	2.0612	1.04348	0.222883	UP	COL22A1	0.103783	0.391261	1.91455	0.99965	UP
hsa-miR-328-3p	138.071	91.0112	0.659163	-0.601293	0.468725	NEUTRAL	COL22A1	0.103783	0.391261	1.91455	0.99965	UP
hsa-miR-328-3p	138.071	91.0112	0.659163	-0.601293	0.468725	NEUTRAL	COL22A1	0.103783	0.391261	1.91455	0.99965	UP
hsa-miR-328-3p	138.071	91.0112	0.659163	-0.601293	0.468725	NEUTRAL	COL22A1	0.103783	0.391261	1.91455	0.99965	UP
hsa-miR-5699-3p	12.449	3.53442	0.283911	-1.81649	0.159969	DOWN	COL22A1	0.103783	0.391261	1.91455	0.99965	UP
hsa-miR-5699-3p	12.449	3.53442	0.283911	-1.81649	0.159969	DOWN	COL22A1	0.103783	0.391261	1.91455	0.99965	UP
hsa-miR-5699-3p	12.449	3.53442	0.283911	-1.81649	0.159969	DOWN	COL22A1	0.103783	0.391261	1.91455	0.99965	UP
hsa-miR-874-5p	14.7125	30.0425	2.04198	1.02997	0.342866	UP	LRRC8E	0.337933	1.19881	1.82679	0.99965	UP
hsa-miR-874-5p	14.7125	30.0425	2.04198	1.02997	0.342866	UP	LRRC8E	0.337933	1.19881	1.82679	0.99965	UP
hsa-miR-766-3p	12.449	16.7885	1.34858	0.431439	0.754984	NEUTRAL	LRRC8E	0.337933	1.19881	1.82679	0.99965	UP
hsa-miR-766-3p	12.449	16.7885	1.34858	0.431439	0.754984	NEUTRAL	LRRC8E	0.337933	1.19881	1.82679	0.99965	UP
hsa-miR-197-3p	679.037	664.47	0.978547	-0.0312863	0.969098	NEUTRAL	LRRC8E	0.337933	1.19881	1.82679	0.99965	UP
hsa-miR-197-3p	679.037	664.47	0.978547	-0.0312863	0.969098	NEUTRAL	LRRC8E	0.337933	1.19881	1.82679	0.99965	UP
hsa-miR-1260b	14.7125	12.3705	0.840814	-0.250141	0.891114	NEUTRAL	LRRC8E	0.337933	1.19881	1.82679	0.99965	UP
hsa-miR-3677-3p	6.79037	9.71964	1.43139	0.517413	0.759969	NEUTRAL	RNF32	0.142288	0.491769	1.78917	0.99965	UP
hsa-miR-3677-3p	6.79037	9.71964	1.43139	0.517413	0.759969	NEUTRAL	RNF32	0.142288	0.491769	1.78917	0.99965	UP
hsa-miR-3677-3p	6.79037	9.71964	1.43139	0.517413	0.759969	NEUTRAL	RNF32	0.142288	0.491769	1.78917	0.99965	UP
hsa-miR-3677-3p	6.79037	9.71964	1.43139	0.517413	0.759969	NEUTRAL	RNF32	0.142288	0.491769	1.78917	0.99965	UP
hsa-miR-3677-3p	6.79037	9.71964	1.43139	0.517413	0.759969	NEUTRAL	RNF32	0.142288	0.491769	1.78917	0.99965	UP
hsa-miR-3677-3p	6.79037	9.71964	1.43139	0.517413	0.759969	NEUTRAL	RNF32	0.142288	0.491769	1.78917	0.99965	UP
hsa-miR-330-5p	63.3768	63.6195	1.00383	0.00551359	1	NEUTRAL	RNF32	0.142288	0.491769	1.78917	0.99965	UP
hsa-miR-379-5p	112.041	251.827	2.24763	1.1684	0.148559	UP	FAM72B	0.170127	0.586094	1.78452	0.99965	UP
hsa-miR-379-5p	112.041	251.827	2.24763	1.1684	0.148559	UP	FAM72B	0.170127	0.586094	1.78452	0.99965	UP
hsa-miR-379-5p	112.041	251.827	2.24763	1.1684	0.148559	UP	FAM72B	0.170127	0.586094	1.78452	0.99965	UP
hsa-miR-370-3p	169.759	161.7	0.952522	-0.0701753	0.937972	NEUTRAL	SEPT4	0.319112	1.0901	1.77233	0.99965	UP
hsa-miR-6716-3p	12.449	10.6032	0.851734	-0.231526	0.919864	NEUTRAL	SEPT4	0.319112	1.0901	1.77233	0.99965	UP
hsa-miR-6716-3p	12.449	10.6032	0.851734	-0.231526	0.919864	NEUTRAL	SEPT4	0.319112	1.0901	1.77233	0.99965	UP
hsa-miR-6716-3p	12.449	10.6032	0.851734	-0.231526	0.919864	NEUTRAL	SEPT4	0.319112	1.0901	1.77233	0.99965	UP
hsa-miR-6716-3p	12.449	10.6032	0.851734	-0.231526	0.919864	NEUTRAL	SEPT4	0.319112	1.0901	1.77233	0.99965	UP
hsa-miR-6716-3p	12.449	10.6032	0.851734	-0.231526	0.919864	NEUTRAL	SEPT4	0.319112	1.0901	1.77233	0.99965	UP
hsa-miR-6716-3p	12.449	10.6032	0.851734	-0.231526	0.919864	NEUTRAL	SEPT4	0.319112	1.0901	1.77233	0.99965	UP
hsa-miR-6716-3p	12.449	10.6032	0.851734	-0.231526	0.919864	NEUTRAL	SEPT4	0.319112	1.0901	1.77233	0.99965	UP
hsa-miR-6716-3p	12.449	10.6032	0.851734	-0.231526	0.919864	NEUTRAL	SEPT4	0.319112	1.0901	1.77233	0.99965	UP
hsa-miR-6716-3p	12.449	10.6032	0.851734	-0.231526	0.919864	NEUTRAL	SEPT4	0.319112	1.0901	1.77233	0.99965	UP
hsa-miR-6716-3p	12.449	10.6032	0.851734	-0.231526	0.919864	NEUTRAL	SEPT4	0.319112	1.0901	1.77233	0.99965	UP
hsa-miR-6716-3p	12.449	10.6032	0.851734	-0.231526	0.919864	NEUTRAL	SEPT4	0.319112	1.0901	1.77233	0.99965	UP
hsa-miR-6716-3p	12.449	10.6032	0.851734	-0.231526	0.919864	NEUTRAL	SEPT4	0.319112	1.0901	1.77233	0.99965	UP
hsa-miR-6716-3p	12.449	10.6032	0.851734	-0.231526	0.919864	NEUTRAL	SEPT4	0.319112	1.0901	1.77233	0.99965	UP
hsa-miR-6716-3p	12.449	10.6032	0.851734	-0.231526	0.919864	NEUTRAL	SEPT4	0.319112	1.0901	1.77233	0.99965	UP
hsa-miR-1285-3p	115.436	132.541	1.14817	0.199337	0.816678	NEUTRAL	ARIH2	18.9399	63.3509	1.74194	0.99965	UP
hsa-miR-1285-3p	115.436	132.541	1.14817	0.199337	0.816678	NEUTRAL	ARIH2	18.9399	63.3509	1.74194	0.99965	UP
hsa-miR-1285-3p	115.436	132.541	1.14817	0.199337	0.816678	NEUTRAL	ARIH2	18.9399	63.3509	1.74194	0.99965	UP
hsa-miR-1285-3p	115.436	132.541	1.14817	0.199337	0.816678	NEUTRAL	ARIH2	18.9399	63.3509	1.74194	0.99965	UP
hsa-miR-1285-3p	115.436	132.541	1.14817	0.199337	0.816678	NEUTRAL	ARIH2	18.9399	63.3509	1.74194	0.99965	UP
hsa-miR-1285-3p	115.436	132.541	1.14817	0.199337	0.816678	NEUTRAL	ARIH2	18.9399	63.3509	1.74194	0.99965	UP
hsa-miR-1285-3p	115.436	132.541	1.14817	0.199337	0.816678	NEUTRAL	ARIH2	18.9399	63.3509	1.74194	0.99965	UP
hsa-miR-1285-3p	115.436	132.541	1.14817	0.199337	0.816678	NEUTRAL	ARIH2	18.9399	63.3509	1.74194	0.99965	UP
hsa-miR-4326	21.5028	23.8573	1.1095	0.149903	0.932342	NEUTRAL	ARIH2	18.9399	63.3509	1.74194	0.99965	UP
hsa-miR-665	33.9519	32.6933	0.962932	-0.0544937	0.990546	NEUTRAL	ARIH2	18.9399	63.3509	1.74194	0.99965	UP
hsa-miR-665	33.9519	32.6933	0.962932	-0.0544937	0.990546	NEUTRAL	ARIH2	18.9399	63.3509	1.74194	0.99965	UP
hsa-miR-1343-3p	6.79037	11.4869	1.69164	0.758421	0.589942	NEUTRAL	ESR1	0.470744	1.55776	1.72646	0.99965	UP
hsa-miR-376a-3p	97.3287	99.8472	1.02588	0.0368577	0.979127	NEUTRAL	ESR1	0.470744	1.55776	1.72646	0.99965	UP
hsa-miR-376a-3p	97.3287	99.8472	1.02588	0.0368577	0.979127	NEUTRAL	ESR1	0.470744	1.55776	1.72646	0.99965	UP
hsa-miR-376a-3p	97.3287	99.8472	1.02588	0.0368577	0.979127	NEUTRAL	ESR1	0.470744	1.55776	1.72646	0.99965	UP
hsa-miR-376a-3p	97.3287	99.8472	1.02588	0.0368577	0.979127	NEUTRAL	ESR1	0.470744	1.55776	1.72646	0.99965	UP
hsa-miR-376a-3p	97.3287	99.8472	1.02588	0.0368577	0.979127	NEUTRAL	ESR1	0.470744	1.55776	1.72646	0.99965	UP
hsa-miR-376a-3p	97.3287	99.8472	1.02588	0.0368577	0.979127	NEUTRAL	ESR1	0.470744	1.55776	1.72646	0.99965	UP
hsa-miR-3180-3p	10.1856	13.2541	1.30126	0.379909	0.813853	NEUTRAL	GPRC5C	0.204832	0.669259	1.70812	0.99965	UP
hsa-miR-125a-5p	24838.1	30540	1.22957	0.298148	0.627718	NEUTRAL	GPRC5C	0.204832	0.669259	1.70812	0.99965	UP
hsa-miR-665	33.9519	32.6933	0.962932	-0.0544937	0.990546	NEUTRAL	GPRC5C	0.204832	0.669259	1.70812	0.99965	UP
hsa-miR-665	33.9519	32.6933	0.962932	-0.0544937	0.990546	NEUTRAL	GPRC5C	0.204832	0.669259	1.70812	0.99965	UP
hsa-miR-296-5p	15.8442	13.2541	0.836524	-0.257521	0.879313	NEUTRAL	GPRC5C	0.204832	0.669259	1.70812	0.99965	UP
hsa-miR-296-5p	15.8442	13.2541	0.836524	-0.257521	0.879313	NEUTRAL	GPRC5C	0.204832	0.669259	1.70812	0.99965	UP
hsa-miR-296-5p	15.8442	13.2541	0.836524	-0.257521	0.879313	NEUTRAL	GPRC5C	0.204832	0.669259	1.70812	0.99965	UP
hsa-miR-296-5p	15.8442	13.2541	0.836524	-0.257521	0.879313	NEUTRAL	GPRC5C	0.204832	0.669259	1.70812	0.99965	UP
hsa-miR-296-5p	15.8442	13.2541	0.836524	-0.257521	0.879313	NEUTRAL	GPRC5C	0.204832	0.669259	1.70812	0.99965	UP
hsa-miR-296-5p	15.8442	13.2541	0.836524	-0.257521	0.879313	NEUTRAL	GPRC5C	0.204832	0.669259	1.70812	0.99965	UP
hsa-miR-127-5p	275.01	384.368	1.39765	0.483003	0.538909	NEUTRAL	ACHE	0.128466	0.419185	1.7062	0.99965	UP
hsa-miR-127-5p	275.01	384.368	1.39765	0.483003	0.538909	NEUTRAL	ACHE	0.128466	0.419185	1.7062	0.99965	UP
hsa-miR-127-5p	275.01	384.368	1.39765	0.483003	0.538909	NEUTRAL	ACHE	0.128466	0.419185	1.7062	0.99965	UP
hsa-miR-127-5p	275.01	384.368	1.39765	0.483003	0.538909	NEUTRAL	ACHE	0.128466	0.419185	1.7062	0.99965	UP
hsa-miR-127-5p	275.01	384.368	1.39765	0.483003	0.538909	NEUTRAL	ACHE	0.128466	0.419185	1.7062	0.99965	UP
hsa-miR-127-5p	275.01	384.368	1.39765	0.483003	0.538909	NEUTRAL	ACHE	0.128466	0.419185	1.7062	0.99965	UP
hsa-miR-127-5p	275.01	384.368	1.39765	0.483003	0.538909	NEUTRAL	ACHE	0.128466	0.419185	1.7062	0.99965	UP
hsa-miR-877-5p	19.2394	15.9049	0.826683	-0.274594	0.850366	NEUTRAL	INHBE	0.204017	0.663842	1.70215	0.99965	UP
hsa-miR-877-5p	19.2394	15.9049	0.826683	-0.274594	0.850366	NEUTRAL	INHBE	0.204017	0.663842	1.70215	0.99965	UP
hsa-miR-877-5p	19.2394	15.9049	0.826683	-0.274594	0.850366	NEUTRAL	INHBE	0.204017	0.663842	1.70215	0.99965	UP
hsa-miR-2277-5p	35.0836	47.7146	1.36003	0.443635	0.654588	NEUTRAL	FRY	0.540039	1.75064	1.69675	0.99965	UP
hsa-miR-2277-5p	35.0836	47.7146	1.36003	0.443635	0.654588	NEUTRAL	FRY	0.540039	1.75064	1.69675	0.99965	UP
hsa-miR-2277-5p	35.0836	47.7146	1.36003	0.443635	0.654588	NEUTRAL	FRY	0.540039	1.75064	1.69675	0.99965	UP
hsa-miR-1285-3p	115.436	132.541	1.14817	0.199337	0.816678	NEUTRAL	SH2D3A	0.190846	0.615759	1.68995	0.99965	UP
hsa-miR-23a-5p	107.514	106.916	0.994436	-0.00804886	1	NEUTRAL	SH2D3A	0.190846	0.615759	1.68995	0.99965	UP
hsa-miR-23a-5p	107.514	106.916	0.994436	-0.00804886	1	NEUTRAL	SH2D3A	0.190846	0.615759	1.68995	0.99965	UP
hsa-miR-23a-5p	107.514	106.916	0.994436	-0.00804886	1	NEUTRAL	SH2D3A	0.190846	0.615759	1.68995	0.99965	UP
hsa-miR-23a-5p	107.514	106.916	0.994436	-0.00804886	1	NEUTRAL	SH2D3A	0.190846	0.615759	1.68995	0.99965	UP
hsa-miR-23a-5p	107.514	106.916	0.994436	-0.00804886	1	NEUTRAL	SH2D3A	0.190846	0.615759	1.68995	0.99965	UP
hsa-miR-23a-5p	107.514	106.916	0.994436	-0.00804886	1	NEUTRAL	SH2D3A	0.190846	0.615759	1.68995	0.99965	UP
hsa-miR-665	33.9519	32.6933	0.962932	-0.0544937	0.990546	NEUTRAL	SH2D3A	0.190846	0.615759	1.68995	0.99965	UP
hsa-miR-665	33.9519	32.6933	0.962932	-0.0544937	0.990546	NEUTRAL	SH2D3A	0.190846	0.615759	1.68995	0.99965	UP
hsa-miR-665	33.9519	32.6933	0.962932	-0.0544937	0.990546	NEUTRAL	SH2D3A	0.190846	0.615759	1.68995	0.99965	UP
hsa-miR-665	33.9519	32.6933	0.962932	-0.0544937	0.990546	NEUTRAL	SH2D3A	0.190846	0.615759	1.68995	0.99965	UP
hsa-miR-665	33.9519	32.6933	0.962932	-0.0544937	0.990546	NEUTRAL	SH2D3A	0.190846	0.615759	1.68995	0.99965	UP
hsa-miR-766-3p	12.449	16.7885	1.34858	0.431439	0.754984	NEUTRAL	RP11-508N12.4,ZNF462	1.52036	4.8554	1.67518	0.99965	UP
hsa-miR-766-3p	12.449	16.7885	1.34858	0.431439	0.754984	NEUTRAL	RP11-508N12.4,ZNF462	1.52036	4.8554	1.67518	0.99965	UP
hsa-miR-210-5p	332.728	350.791	1.05429	0.0762664	0.926502	NEUTRAL	RP11-508N12.4,ZNF462	1.52036	4.8554	1.67518	0.99965	UP
hsa-miR-210-5p	332.728	350.791	1.05429	0.0762664	0.926502	NEUTRAL	RP11-508N12.4,ZNF462	1.52036	4.8554	1.67518	0.99965	UP
hsa-miR-3960	12.449	0.883604	0.0709778	-3.81649	0.016522	DOWN	RP11-508N12.4,ZNF462	1.52036	4.8554	1.67518	0.99965	UP
hsa-miR-1260b	14.7125	12.3705	0.840814	-0.250141	0.891114	NEUTRAL	SLC26A10	0.416976	1.27734	1.61511	0.99965	UP
hsa-miR-1260b	14.7125	12.3705	0.840814	-0.250141	0.891114	NEUTRAL	SLC26A10	0.416976	1.27734	1.61511	0.99965	UP
hsa-miR-1260b	14.7125	12.3705	0.840814	-0.250141	0.891114	NEUTRAL	SLC26A10	0.416976	1.27734	1.61511	0.99965	UP
hsa-miR-4454	49.7961	37.995	0.763011	-0.390223	0.690869	NEUTRAL	ATP2A1	0.15026	0.443494	1.56145	0.99965	UP
hsa-miR-4454	49.7961	37.995	0.763011	-0.390223	0.690869	NEUTRAL	ATP2A1	0.15026	0.443494	1.56145	0.99965	UP
hsa-miR-4454	49.7961	37.995	0.763011	-0.390223	0.690869	NEUTRAL	ATP2A1	0.15026	0.443494	1.56145	0.99965	UP
hsa-miR-92b-5p	2.26346	11.4869	5.07491	2.34338	0.103638	UP	PKMYT1	0.170727	0.501266	1.55389	0.99965	UP
hsa-miR-92b-5p	2.26346	11.4869	5.07491	2.34338	0.103638	UP	PKMYT1	0.170727	0.501266	1.55389	0.99965	UP
hsa-miR-92b-5p	2.26346	11.4869	5.07491	2.34338	0.103638	UP	PKMYT1	0.170727	0.501266	1.55389	0.99965	UP
hsa-miR-92b-5p	2.26346	11.4869	5.07491	2.34338	0.103638	UP	PKMYT1	0.170727	0.501266	1.55389	0.99965	UP
hsa-miR-92b-5p	2.26346	11.4869	5.07491	2.34338	0.103638	UP	PKMYT1	0.170727	0.501266	1.55389	0.99965	UP
hsa-miR-92b-5p	2.26346	11.4869	5.07491	2.34338	0.103638	UP	PKMYT1	0.170727	0.501266	1.55389	0.99965	UP
hsa-miR-92b-5p	2.26346	11.4869	5.07491	2.34338	0.103638	UP	PKMYT1	0.170727	0.501266	1.55389	0.99965	UP
hsa-miR-92b-5p	2.26346	11.4869	5.07491	2.34338	0.103638	UP	PKMYT1	0.170727	0.501266	1.55389	0.99965	UP
hsa-miR-92b-5p	2.26346	11.4869	5.07491	2.34338	0.103638	UP	PKMYT1	0.170727	0.501266	1.55389	0.99965	UP
hsa-miR-92b-5p	2.26346	11.4869	5.07491	2.34338	0.103638	UP	PKMYT1	0.170727	0.501266	1.55389	0.99965	UP
hsa-miR-185-3p	5.65864	12.3705	2.18612	1.12837	0.393641	UP	PKMYT1	0.170727	0.501266	1.55389	0.99965	UP
hsa-miR-671-5p	56.5864	116.636	2.0612	1.04348	0.222883	UP	PKMYT1	0.170727	0.501266	1.55389	0.99965	UP
hsa-miR-671-5p	56.5864	116.636	2.0612	1.04348	0.222883	UP	PKMYT1	0.170727	0.501266	1.55389	0.99965	UP
hsa-miR-671-5p	56.5864	116.636	2.0612	1.04348	0.222883	UP	PKMYT1	0.170727	0.501266	1.55389	0.99965	UP
hsa-miR-671-5p	56.5864	116.636	2.0612	1.04348	0.222883	UP	PKMYT1	0.170727	0.501266	1.55389	0.99965	UP
hsa-miR-671-5p	56.5864	116.636	2.0612	1.04348	0.222883	UP	PKMYT1	0.170727	0.501266	1.55389	0.99965	UP
hsa-miR-671-5p	56.5864	116.636	2.0612	1.04348	0.222883	UP	PKMYT1	0.170727	0.501266	1.55389	0.99965	UP
hsa-miR-671-5p	56.5864	116.636	2.0612	1.04348	0.222883	UP	PKMYT1	0.170727	0.501266	1.55389	0.99965	UP
hsa-miR-671-5p	56.5864	116.636	2.0612	1.04348	0.222883	UP	PKMYT1	0.170727	0.501266	1.55389	0.99965	UP
hsa-miR-671-5p	56.5864	116.636	2.0612	1.04348	0.222883	UP	PKMYT1	0.170727	0.501266	1.55389	0.99965	UP
hsa-miR-3180-3p	10.1856	13.2541	1.30126	0.379909	0.813853	NEUTRAL	PKMYT1	0.170727	0.501266	1.55389	0.99965	UP
hsa-miR-3180-3p	10.1856	13.2541	1.30126	0.379909	0.813853	NEUTRAL	PKMYT1	0.170727	0.501266	1.55389	0.99965	UP
hsa-miR-3180-3p	10.1856	13.2541	1.30126	0.379909	0.813853	NEUTRAL	PKMYT1	0.170727	0.501266	1.55389	0.99965	UP
hsa-miR-3180-3p	10.1856	13.2541	1.30126	0.379909	0.813853	NEUTRAL	PKMYT1	0.170727	0.501266	1.55389	0.99965	UP
hsa-miR-3180-3p	10.1856	13.2541	1.30126	0.379909	0.813853	NEUTRAL	PKMYT1	0.170727	0.501266	1.55389	0.99965	UP
hsa-miR-3180-3p	10.1856	13.2541	1.30126	0.379909	0.813853	NEUTRAL	PKMYT1	0.170727	0.501266	1.55389	0.99965	UP
hsa-miR-3180-3p	10.1856	13.2541	1.30126	0.379909	0.813853	NEUTRAL	PKMYT1	0.170727	0.501266	1.55389	0.99965	UP
hsa-miR-3180-3p	10.1856	13.2541	1.30126	0.379909	0.813853	NEUTRAL	PKMYT1	0.170727	0.501266	1.55389	0.99965	UP
hsa-miR-3180-3p	10.1856	13.2541	1.30126	0.379909	0.813853	NEUTRAL	PKMYT1	0.170727	0.501266	1.55389	0.99965	UP
hsa-miR-3180-3p	10.1856	13.2541	1.30126	0.379909	0.813853	NEUTRAL	PKMYT1	0.170727	0.501266	1.55389	0.99965	UP
hsa-miR-296-5p	15.8442	13.2541	0.836524	-0.257521	0.879313	NEUTRAL	PKMYT1	0.170727	0.501266	1.55389	0.99965	UP
hsa-miR-665	33.9519	32.6933	0.962932	-0.0544937	0.990546	NEUTRAL	RBP1	0.259713	0.758746	1.5467	0.99965	UP
hsa-miR-490-3p	33.9519	20.3229	0.59858	-0.740385	0.477756	NEUTRAL	RBP1	0.259713	0.758746	1.5467	0.99965	UP
hsa-miR-490-3p	33.9519	20.3229	0.59858	-0.740385	0.477756	NEUTRAL	RBP1	0.259713	0.758746	1.5467	0.99965	UP
hsa-miR-490-3p	33.9519	20.3229	0.59858	-0.740385	0.477756	NEUTRAL	RBP1	0.259713	0.758746	1.5467	0.99965	UP
hsa-miR-490-3p	33.9519	20.3229	0.59858	-0.740385	0.477756	NEUTRAL	RBP1	0.259713	0.758746	1.5467	0.99965	UP
hsa-miR-490-3p	33.9519	20.3229	0.59858	-0.740385	0.477756	NEUTRAL	RBP1	0.259713	0.758746	1.5467	0.99965	UP
hsa-miR-490-3p	33.9519	20.3229	0.59858	-0.740385	0.477756	NEUTRAL	RBP1	0.259713	0.758746	1.5467	0.99965	UP
hsa-miR-5787	12.449	3068.76	246.506	7.94548	1.13133e-14	UP	OBSCN	0.523561	1.49798	1.51659	0.99965	UP
hsa-miR-5787	12.449	3068.76	246.506	7.94548	1.13133e-14	UP	OBSCN	0.523561	1.49798	1.51659	0.99965	UP
hsa-miR-615-3p	221.819	531.046	2.39405	1.25945	0.110381	UP	OBSCN	0.523561	1.49798	1.51659	0.99965	UP
hsa-miR-615-3p	221.819	531.046	2.39405	1.25945	0.110381	UP	OBSCN	0.523561	1.49798	1.51659	0.99965	UP
hsa-miR-615-3p	221.819	531.046	2.39405	1.25945	0.110381	UP	OBSCN	0.523561	1.49798	1.51659	0.99965	UP
hsa-miR-615-3p	221.819	531.046	2.39405	1.25945	0.110381	UP	OBSCN	0.523561	1.49798	1.51659	0.99965	UP
hsa-miR-615-3p	221.819	531.046	2.39405	1.25945	0.110381	UP	OBSCN	0.523561	1.49798	1.51659	0.99965	UP
hsa-miR-671-5p	56.5864	116.636	2.0612	1.04348	0.222883	UP	OBSCN	0.523561	1.49798	1.51659	0.99965	UP
hsa-miR-671-5p	56.5864	116.636	2.0612	1.04348	0.222883	UP	OBSCN	0.523561	1.49798	1.51659	0.99965	UP
hsa-miR-671-5p	56.5864	116.636	2.0612	1.04348	0.222883	UP	OBSCN	0.523561	1.49798	1.51659	0.99965	UP
hsa-miR-1343-3p	6.79037	11.4869	1.69164	0.758421	0.589942	NEUTRAL	OBSCN	0.523561	1.49798	1.51659	0.99965	UP
hsa-miR-1343-3p	6.79037	11.4869	1.69164	0.758421	0.589942	NEUTRAL	OBSCN	0.523561	1.49798	1.51659	0.99965	UP
hsa-miR-1343-3p	6.79037	11.4869	1.69164	0.758421	0.589942	NEUTRAL	OBSCN	0.523561	1.49798	1.51659	0.99965	UP
hsa-miR-887-5p	6.79037	9.71964	1.43139	0.517413	0.759969	NEUTRAL	OBSCN	0.523561	1.49798	1.51659	0.99965	UP
hsa-miR-887-5p	6.79037	9.71964	1.43139	0.517413	0.759969	NEUTRAL	OBSCN	0.523561	1.49798	1.51659	0.99965	UP
hsa-miR-887-5p	6.79037	9.71964	1.43139	0.517413	0.759969	NEUTRAL	OBSCN	0.523561	1.49798	1.51659	0.99965	UP
hsa-miR-766-3p	12.449	16.7885	1.34858	0.431439	0.754984	NEUTRAL	OBSCN	0.523561	1.49798	1.51659	0.99965	UP
hsa-miR-766-3p	12.449	16.7885	1.34858	0.431439	0.754984	NEUTRAL	OBSCN	0.523561	1.49798	1.51659	0.99965	UP
hsa-miR-766-3p	12.449	16.7885	1.34858	0.431439	0.754984	NEUTRAL	OBSCN	0.523561	1.49798	1.51659	0.99965	UP
hsa-miR-766-3p	12.449	16.7885	1.34858	0.431439	0.754984	NEUTRAL	OBSCN	0.523561	1.49798	1.51659	0.99965	UP
hsa-miR-342-3p	311.225	339.304	1.09022	0.124618	0.87752	NEUTRAL	OBSCN	0.523561	1.49798	1.51659	0.99965	UP
hsa-miR-342-3p	311.225	339.304	1.09022	0.124618	0.87752	NEUTRAL	OBSCN	0.523561	1.49798	1.51659	0.99965	UP
hsa-miR-342-3p	311.225	339.304	1.09022	0.124618	0.87752	NEUTRAL	OBSCN	0.523561	1.49798	1.51659	0.99965	UP
hsa-miR-342-3p	311.225	339.304	1.09022	0.124618	0.87752	NEUTRAL	OBSCN	0.523561	1.49798	1.51659	0.99965	UP
hsa-miR-342-3p	311.225	339.304	1.09022	0.124618	0.87752	NEUTRAL	OBSCN	0.523561	1.49798	1.51659	0.99965	UP
hsa-miR-342-3p	311.225	339.304	1.09022	0.124618	0.87752	NEUTRAL	OBSCN	0.523561	1.49798	1.51659	0.99965	UP
hsa-miR-342-3p	311.225	339.304	1.09022	0.124618	0.87752	NEUTRAL	OBSCN	0.523561	1.49798	1.51659	0.99965	UP
hsa-miR-210-5p	332.728	350.791	1.05429	0.0762664	0.926502	NEUTRAL	OBSCN	0.523561	1.49798	1.51659	0.99965	UP
hsa-miR-210-5p	332.728	350.791	1.05429	0.0762664	0.926502	NEUTRAL	OBSCN	0.523561	1.49798	1.51659	0.99965	UP
hsa-miR-210-5p	332.728	350.791	1.05429	0.0762664	0.926502	NEUTRAL	OBSCN	0.523561	1.49798	1.51659	0.99965	UP
hsa-miR-210-5p	332.728	350.791	1.05429	0.0762664	0.926502	NEUTRAL	OBSCN	0.523561	1.49798	1.51659	0.99965	UP
hsa-miR-431-3p	66.772	68.9211	1.03219	0.0457027	0.97798	NEUTRAL	OBSCN	0.523561	1.49798	1.51659	0.99965	UP
hsa-miR-431-3p	66.772	68.9211	1.03219	0.0457027	0.97798	NEUTRAL	OBSCN	0.523561	1.49798	1.51659	0.99965	UP
hsa-miR-431-3p	66.772	68.9211	1.03219	0.0457027	0.97798	NEUTRAL	OBSCN	0.523561	1.49798	1.51659	0.99965	UP
hsa-miR-431-3p	66.772	68.9211	1.03219	0.0457027	0.97798	NEUTRAL	OBSCN	0.523561	1.49798	1.51659	0.99965	UP
hsa-miR-874-3p	162.969	147.562	0.90546	-0.143277	0.866022	NEUTRAL	OBSCN	0.523561	1.49798	1.51659	0.99965	UP
hsa-miR-328-3p	138.071	91.0112	0.659163	-0.601293	0.468725	NEUTRAL	OBSCN	0.523561	1.49798	1.51659	0.99965	UP
hsa-miR-328-3p	138.071	91.0112	0.659163	-0.601293	0.468725	NEUTRAL	OBSCN	0.523561	1.49798	1.51659	0.99965	UP
hsa-miR-328-3p	138.071	91.0112	0.659163	-0.601293	0.468725	NEUTRAL	OBSCN	0.523561	1.49798	1.51659	0.99965	UP
hsa-miR-328-3p	138.071	91.0112	0.659163	-0.601293	0.468725	NEUTRAL	OBSCN	0.523561	1.49798	1.51659	0.99965	UP
hsa-miR-3605-3p	28.2932	18.5557	0.655835	-0.608595	0.579037	NEUTRAL	OBSCN	0.523561	1.49798	1.51659	0.99965	UP
hsa-miR-3605-3p	28.2932	18.5557	0.655835	-0.608595	0.579037	NEUTRAL	OBSCN	0.523561	1.49798	1.51659	0.99965	UP
hsa-miR-4466	12.449	7.06883	0.567822	-0.816488	0.536058	NEUTRAL	OBSCN	0.523561	1.49798	1.51659	0.99965	UP
hsa-miR-4466	12.449	7.06883	0.567822	-0.816488	0.536058	NEUTRAL	OBSCN	0.523561	1.49798	1.51659	0.99965	UP
hsa-miR-4466	12.449	7.06883	0.567822	-0.816488	0.536058	NEUTRAL	OBSCN	0.523561	1.49798	1.51659	0.99965	UP
hsa-miR-668-3p	49.7961	23.8573	0.4791	-1.0616	0.273393	DOWN	OBSCN	0.523561	1.49798	1.51659	0.99965	UP
hsa-miR-668-3p	49.7961	23.8573	0.4791	-1.0616	0.273393	DOWN	OBSCN	0.523561	1.49798	1.51659	0.99965	UP
hsa-miR-668-3p	49.7961	23.8573	0.4791	-1.0616	0.273393	DOWN	OBSCN	0.523561	1.49798	1.51659	0.99965	UP
hsa-miR-330-5p	63.3768	63.6195	1.00383	0.00551359	1	NEUTRAL	ANKRD61	0.320209	0.897718	1.48725	0.99965	UP
hsa-let-7e-5p	15.8442	8.83604	0.557683	-0.842483	0.497404	NEUTRAL	MASP1	1.41465	3.96537	1.48702	0.99965	UP
hsa-miR-5787	12.449	3068.76	246.506	7.94548	1.13133e-14	UP	DMTN	0.156799	0.436277	1.47633	0.99965	UP
hsa-miR-5787	12.449	3068.76	246.506	7.94548	1.13133e-14	UP	DMTN	0.156799	0.436277	1.47633	0.99965	UP
hsa-miR-5787	12.449	3068.76	246.506	7.94548	1.13133e-14	UP	DMTN	0.156799	0.436277	1.47633	0.99965	UP
hsa-miR-671-5p	56.5864	116.636	2.0612	1.04348	0.222883	UP	DMTN	0.156799	0.436277	1.47633	0.99965	UP
hsa-miR-671-5p	56.5864	116.636	2.0612	1.04348	0.222883	UP	DMTN	0.156799	0.436277	1.47633	0.99965	UP
hsa-miR-671-5p	56.5864	116.636	2.0612	1.04348	0.222883	UP	DMTN	0.156799	0.436277	1.47633	0.99965	UP
hsa-miR-671-5p	56.5864	116.636	2.0612	1.04348	0.222883	UP	DMTN	0.156799	0.436277	1.47633	0.99965	UP
hsa-miR-671-5p	56.5864	116.636	2.0612	1.04348	0.222883	UP	DMTN	0.156799	0.436277	1.47633	0.99965	UP
hsa-miR-671-5p	56.5864	116.636	2.0612	1.04348	0.222883	UP	DMTN	0.156799	0.436277	1.47633	0.99965	UP
hsa-miR-671-5p	56.5864	116.636	2.0612	1.04348	0.222883	UP	DMTN	0.156799	0.436277	1.47633	0.99965	UP
hsa-miR-671-5p	56.5864	116.636	2.0612	1.04348	0.222883	UP	DMTN	0.156799	0.436277	1.47633	0.99965	UP
hsa-miR-671-5p	56.5864	116.636	2.0612	1.04348	0.222883	UP	DMTN	0.156799	0.436277	1.47633	0.99965	UP
hsa-miR-671-5p	56.5864	116.636	2.0612	1.04348	0.222883	UP	DMTN	0.156799	0.436277	1.47633	0.99965	UP
hsa-miR-328-3p	138.071	91.0112	0.659163	-0.601293	0.468725	NEUTRAL	DMTN	0.156799	0.436277	1.47633	0.99965	UP
hsa-miR-328-3p	138.071	91.0112	0.659163	-0.601293	0.468725	NEUTRAL	DMTN	0.156799	0.436277	1.47633	0.99965	UP
hsa-miR-328-3p	138.071	91.0112	0.659163	-0.601293	0.468725	NEUTRAL	DMTN	0.156799	0.436277	1.47633	0.99965	UP
hsa-miR-328-3p	138.071	91.0112	0.659163	-0.601293	0.468725	NEUTRAL	DMTN	0.156799	0.436277	1.47633	0.99965	UP
hsa-miR-328-3p	138.071	91.0112	0.659163	-0.601293	0.468725	NEUTRAL	DMTN	0.156799	0.436277	1.47633	0.99965	UP
hsa-miR-668-3p	49.7961	23.8573	0.4791	-1.0616	0.273393	DOWN	DMTN	0.156799	0.436277	1.47633	0.99965	UP
hsa-miR-197-3p	679.037	664.47	0.978547	-0.0312863	0.969098	NEUTRAL	ATP8A1	0.141355	0.387178	1.45368	0.99965	UP
hsa-miR-484	1291.3	1132.78	0.877238	-0.188959	0.800823	NEUTRAL	ATP8A1	0.141355	0.387178	1.45368	0.99965	UP
hsa-miR-484	1291.3	1132.78	0.877238	-0.188959	0.800823	NEUTRAL	ATP8A1	0.141355	0.387178	1.45368	0.99965	UP
hsa-miR-484	1291.3	1132.78	0.877238	-0.188959	0.800823	NEUTRAL	ATP8A1	0.141355	0.387178	1.45368	0.99965	UP
hsa-miR-1285-3p	115.436	132.541	1.14817	0.199337	0.816678	NEUTRAL	ZNF774	0.574546	1.56261	1.44346	0.99965	UP
hsa-miR-365b-5p	18.1077	22.0901	1.21993	0.2868	0.833175	NEUTRAL	NPPB	2.64642	7.15567	1.43504	0.99965	UP
hsa-miR-1307-5p	561.337	980.8	1.74726	0.805091	0.292766	NEUTRAL	CDH8	0.149124	0.402838	1.43369	0.99965	UP
hsa-miR-1307-5p	561.337	980.8	1.74726	0.805091	0.292766	NEUTRAL	CDH8	0.149124	0.402838	1.43369	0.99965	UP
hsa-miR-1307-5p	561.337	980.8	1.74726	0.805091	0.292766	NEUTRAL	CDH8	0.149124	0.402838	1.43369	0.99965	UP
hsa-miR-1307-5p	561.337	980.8	1.74726	0.805091	0.292766	NEUTRAL	CDH8	0.149124	0.402838	1.43369	0.99965	UP
hsa-miR-1307-5p	561.337	980.8	1.74726	0.805091	0.292766	NEUTRAL	CDH8	0.149124	0.402838	1.43369	0.99965	UP
hsa-miR-181a-5p	125018	119632	0.956922	-0.063527	0.900877	NEUTRAL	CDH8	0.149124	0.402838	1.43369	0.99965	UP
hsa-miR-181a-5p	125018	119632	0.956922	-0.063527	0.900877	NEUTRAL	CDH8	0.149124	0.402838	1.43369	0.99965	UP
hsa-miR-181a-5p	125018	119632	0.956922	-0.063527	0.900877	NEUTRAL	CDH8	0.149124	0.402838	1.43369	0.99965	UP
hsa-miR-3960	12.449	0.883604	0.0709778	-3.81649	0.016522	DOWN	CDH8	0.149124	0.402838	1.43369	0.99965	UP
hsa-miR-3960	12.449	0.883604	0.0709778	-3.81649	0.016522	DOWN	CDH8	0.149124	0.402838	1.43369	0.99965	UP
hsa-miR-3960	12.449	0.883604	0.0709778	-3.81649	0.016522	DOWN	CDH8	0.149124	0.402838	1.43369	0.99965	UP
hsa-miR-3960	12.449	0.883604	0.0709778	-3.81649	0.016522	DOWN	CDH8	0.149124	0.402838	1.43369	0.99965	UP
hsa-miR-210-5p	332.728	350.791	1.05429	0.0762664	0.926502	NEUTRAL	IGF1	0.685624	1.83512	1.42039	0.99965	UP
hsa-miR-210-5p	332.728	350.791	1.05429	0.0762664	0.926502	NEUTRAL	IGF1	0.685624	1.83512	1.42039	0.99965	UP
hsa-miR-210-5p	332.728	350.791	1.05429	0.0762664	0.926502	NEUTRAL	IGF1	0.685624	1.83512	1.42039	0.99965	UP
hsa-miR-210-5p	332.728	350.791	1.05429	0.0762664	0.926502	NEUTRAL	IGF1	0.685624	1.83512	1.42039	0.99965	UP
hsa-miR-210-5p	332.728	350.791	1.05429	0.0762664	0.926502	NEUTRAL	IGF1	0.685624	1.83512	1.42039	0.99965	UP
hsa-miR-210-5p	332.728	350.791	1.05429	0.0762664	0.926502	NEUTRAL	IGF1	0.685624	1.83512	1.42039	0.99965	UP
hsa-miR-138-5p	10404	7145.71	0.686824	-0.541988	0.419407	NEUTRAL	IGF1	0.685624	1.83512	1.42039	0.99965	UP
hsa-miR-138-5p	10404	7145.71	0.686824	-0.541988	0.419407	NEUTRAL	IGF1	0.685624	1.83512	1.42039	0.99965	UP
hsa-miR-138-5p	10404	7145.71	0.686824	-0.541988	0.419407	NEUTRAL	IGF1	0.685624	1.83512	1.42039	0.99965	UP
hsa-miR-138-5p	10404	7145.71	0.686824	-0.541988	0.419407	NEUTRAL	IGF1	0.685624	1.83512	1.42039	0.99965	UP
hsa-miR-138-5p	10404	7145.71	0.686824	-0.541988	0.419407	NEUTRAL	IGF1	0.685624	1.83512	1.42039	0.99965	UP
hsa-miR-138-5p	10404	7145.71	0.686824	-0.541988	0.419407	NEUTRAL	IGF1	0.685624	1.83512	1.42039	0.99965	UP
hsa-miR-766-3p	12.449	16.7885	1.34858	0.431439	0.754984	NEUTRAL	CTD-3092A11.1	0.358711	0.952445	1.40881	0.99965	UP
hsa-miR-550a-5p	13.5807	25.6245	1.88683	0.915962	0.415404	NEUTRAL	ATP5G1P4	0.317524	0.83621	1.397	0.99965	UP
hsa-miR-2277-5p	35.0836	47.7146	1.36003	0.443635	0.654588	NEUTRAL	CCDC7	0.269191	0.707188	1.39346	0.99965	UP
hsa-miR-877-5p	19.2394	15.9049	0.826683	-0.274594	0.850366	NEUTRAL	CCDC7	0.269191	0.707188	1.39346	0.99965	UP
hsa-miR-877-5p	19.2394	15.9049	0.826683	-0.274594	0.850366	NEUTRAL	CCDC7	0.269191	0.707188	1.39346	0.99965	UP
hsa-miR-5787	12.449	3068.76	246.506	7.94548	1.13133e-14	UP	CACNA1A	0.177671	0.465795	1.39048	0.99965	UP
hsa-miR-5787	12.449	3068.76	246.506	7.94548	1.13133e-14	UP	CACNA1A	0.177671	0.465795	1.39048	0.99965	UP
hsa-miR-5787	12.449	3068.76	246.506	7.94548	1.13133e-14	UP	CACNA1A	0.177671	0.465795	1.39048	0.99965	UP
hsa-miR-5787	12.449	3068.76	246.506	7.94548	1.13133e-14	UP	CACNA1A	0.177671	0.465795	1.39048	0.99965	UP
hsa-miR-5787	12.449	3068.76	246.506	7.94548	1.13133e-14	UP	CACNA1A	0.177671	0.465795	1.39048	0.99965	UP
hsa-miR-940	5.65864	13.2541	2.34227	1.22791	0.344393	UP	CACNA1A	0.177671	0.465795	1.39048	0.99965	UP
hsa-miR-1268b	70.1672	68.9211	0.982241	-0.0258506	0.995133	NEUTRAL	CACNA1A	0.177671	0.465795	1.39048	0.99965	UP
hsa-miR-1268b	70.1672	68.9211	0.982241	-0.0258506	0.995133	NEUTRAL	CACNA1A	0.177671	0.465795	1.39048	0.99965	UP
hsa-miR-1268b	70.1672	68.9211	0.982241	-0.0258506	0.995133	NEUTRAL	CACNA1A	0.177671	0.465795	1.39048	0.99965	UP
hsa-miR-3615	79.221	71.5719	0.903446	-0.14649	0.879307	NEUTRAL	CACNA1A	0.177671	0.465795	1.39048	0.99965	UP
hsa-miR-3615	79.221	71.5719	0.903446	-0.14649	0.879307	NEUTRAL	CACNA1A	0.177671	0.465795	1.39048	0.99965	UP
hsa-miR-3615	79.221	71.5719	0.903446	-0.14649	0.879307	NEUTRAL	CACNA1A	0.177671	0.465795	1.39048	0.99965	UP
hsa-miR-3615	79.221	71.5719	0.903446	-0.14649	0.879307	NEUTRAL	CACNA1A	0.177671	0.465795	1.39048	0.99965	UP
hsa-miR-3615	79.221	71.5719	0.903446	-0.14649	0.879307	NEUTRAL	CACNA1A	0.177671	0.465795	1.39048	0.99965	UP
hsa-miR-4532	43237.7	8708.8	0.201417	-2.31174	0.000347847	DOWN	CACNA1A	0.177671	0.465795	1.39048	0.99965	UP
hsa-miR-4532	43237.7	8708.8	0.201417	-2.31174	0.000347847	DOWN	CACNA1A	0.177671	0.465795	1.39048	0.99965	UP
hsa-miR-4532	43237.7	8708.8	0.201417	-2.31174	0.000347847	DOWN	CACNA1A	0.177671	0.465795	1.39048	0.99965	UP
hsa-miR-4532	43237.7	8708.8	0.201417	-2.31174	0.000347847	DOWN	CACNA1A	0.177671	0.465795	1.39048	0.99965	UP
hsa-miR-4532	43237.7	8708.8	0.201417	-2.31174	0.000347847	DOWN	CACNA1A	0.177671	0.465795	1.39048	0.99965	UP
hsa-miR-1285-3p	115.436	132.541	1.14817	0.199337	0.816678	NEUTRAL	OOEP	0.1577	0.412061	1.38567	0.99965	UP
hsa-miR-1285-3p	115.436	132.541	1.14817	0.199337	0.816678	NEUTRAL	OOEP	0.1577	0.412061	1.38567	0.99965	UP
hsa-miR-1285-3p	115.436	132.541	1.14817	0.199337	0.816678	NEUTRAL	CFI	1.15976	2.98356	1.36321	0.99965	UP
hsa-miR-615-3p	221.819	531.046	2.39405	1.25945	0.110381	UP	FBXL22	0.218111	0.559985	1.36033	0.99965	UP
hsa-miR-185-3p	5.65864	12.3705	2.18612	1.12837	0.393641	UP	FBXL22	0.218111	0.559985	1.36033	0.99965	UP
hsa-miR-210-5p	332.728	350.791	1.05429	0.0762664	0.926502	NEUTRAL	FBXL22	0.218111	0.559985	1.36033	0.99965	UP
hsa-miR-331-3p	379.129	285.404	0.752789	-0.409683	0.601587	NEUTRAL	FBXL22	0.218111	0.559985	1.36033	0.99965	UP
hsa-miR-6511b-3p	15.8442	8.83604	0.557683	-0.842483	0.497404	NEUTRAL	FBXL22	0.218111	0.559985	1.36033	0.99965	UP
hsa-miR-671-3p	499.092	227.086	0.454998	-1.13607	0.148581	DOWN	FBXL22	0.218111	0.559985	1.36033	0.99965	UP
hsa-miR-4532	43237.7	8708.8	0.201417	-2.31174	0.000347847	DOWN	FBXL22	0.218111	0.559985	1.36033	0.99965	UP
hsa-miR-4286	610.002	118.403	0.194103	-2.36511	0.00374536	DOWN	FBXL22	0.218111	0.559985	1.36033	0.99965	UP
hsa-miR-4286	610.002	118.403	0.194103	-2.36511	0.00374536	DOWN	FBXL22	0.218111	0.559985	1.36033	0.99965	UP
hsa-miR-431-3p	66.772	68.9211	1.03219	0.0457027	0.97798	NEUTRAL	MGP	0.201975	0.512062	1.34214	0.99965	UP
hsa-miR-431-3p	66.772	68.9211	1.03219	0.0457027	0.97798	NEUTRAL	MGP	0.201975	0.512062	1.34214	0.99965	UP
hsa-miR-431-3p	66.772	68.9211	1.03219	0.0457027	0.97798	NEUTRAL	MGP	0.201975	0.512062	1.34214	0.99965	UP
hsa-miR-484	1291.3	1132.78	0.877238	-0.188959	0.800823	NEUTRAL	CD163,CD163L1	0.347239	0.862674	1.31289	0.99965	UP
hsa-miR-484	1291.3	1132.78	0.877238	-0.188959	0.800823	NEUTRAL	CD163,CD163L1	0.347239	0.862674	1.31289	0.99965	UP
hsa-miR-484	1291.3	1132.78	0.877238	-0.188959	0.800823	NEUTRAL	CD163,CD163L1	0.347239	0.862674	1.31289	0.99965	UP
hsa-miR-484	1291.3	1132.78	0.877238	-0.188959	0.800823	NEUTRAL	CD163,CD163L1	0.347239	0.862674	1.31289	0.99965	UP
hsa-miR-484	1291.3	1132.78	0.877238	-0.188959	0.800823	NEUTRAL	CD163,CD163L1	0.347239	0.862674	1.31289	0.99965	UP
hsa-miR-3176	13.5807	32.6933	2.40733	1.26743	0.238661	UP	ARHGAP27	0.238623	0.589642	1.3051	0.99965	UP
hsa-miR-3176	13.5807	32.6933	2.40733	1.26743	0.238661	UP	ARHGAP27	0.238623	0.589642	1.3051	0.99965	UP
hsa-miR-3176	13.5807	32.6933	2.40733	1.26743	0.238661	UP	ARHGAP27	0.238623	0.589642	1.3051	0.99965	UP
hsa-miR-3176	13.5807	32.6933	2.40733	1.26743	0.238661	UP	ARHGAP27	0.238623	0.589642	1.3051	0.99965	UP
hsa-miR-3176	13.5807	32.6933	2.40733	1.26743	0.238661	UP	ARHGAP27	0.238623	0.589642	1.3051	0.99965	UP
hsa-miR-3176	13.5807	32.6933	2.40733	1.26743	0.238661	UP	ARHGAP27	0.238623	0.589642	1.3051	0.99965	UP
hsa-miR-3176	13.5807	32.6933	2.40733	1.26743	0.238661	UP	ARHGAP27	0.238623	0.589642	1.3051	0.99965	UP
hsa-miR-3176	13.5807	32.6933	2.40733	1.26743	0.238661	UP	ARHGAP27	0.238623	0.589642	1.3051	0.99965	UP
hsa-miR-3176	13.5807	32.6933	2.40733	1.26743	0.238661	UP	ARHGAP27	0.238623	0.589642	1.3051	0.99965	UP
hsa-miR-3176	13.5807	32.6933	2.40733	1.26743	0.238661	UP	ARHGAP27	0.238623	0.589642	1.3051	0.99965	UP
hsa-miR-3176	13.5807	32.6933	2.40733	1.26743	0.238661	UP	ARHGAP27	0.238623	0.589642	1.3051	0.99965	UP
hsa-miR-3176	13.5807	32.6933	2.40733	1.26743	0.238661	UP	ARHGAP27	0.238623	0.589642	1.3051	0.99965	UP
hsa-miR-3176	13.5807	32.6933	2.40733	1.26743	0.238661	UP	ARHGAP27	0.238623	0.589642	1.3051	0.99965	UP
hsa-miR-3176	13.5807	32.6933	2.40733	1.26743	0.238661	UP	ARHGAP27	0.238623	0.589642	1.3051	0.99965	UP
hsa-miR-25-5p	19.2394	30.0425	1.56151	0.642944	0.555495	NEUTRAL	ARHGAP27	0.238623	0.589642	1.3051	0.99965	UP
hsa-miR-25-5p	19.2394	30.0425	1.56151	0.642944	0.555495	NEUTRAL	ARHGAP27	0.238623	0.589642	1.3051	0.99965	UP
hsa-miR-25-5p	19.2394	30.0425	1.56151	0.642944	0.555495	NEUTRAL	ARHGAP27	0.238623	0.589642	1.3051	0.99965	UP
hsa-miR-25-5p	19.2394	30.0425	1.56151	0.642944	0.555495	NEUTRAL	ARHGAP27	0.238623	0.589642	1.3051	0.99965	UP
hsa-miR-193b-5p	27.1615	30.9261	1.1386	0.187264	0.886974	NEUTRAL	ARHGAP27	0.238623	0.589642	1.3051	0.99965	UP
hsa-miR-193b-5p	27.1615	30.9261	1.1386	0.187264	0.886974	NEUTRAL	ARHGAP27	0.238623	0.589642	1.3051	0.99965	UP
hsa-miR-193b-5p	27.1615	30.9261	1.1386	0.187264	0.886974	NEUTRAL	ARHGAP27	0.238623	0.589642	1.3051	0.99965	UP
hsa-miR-193b-5p	27.1615	30.9261	1.1386	0.187264	0.886974	NEUTRAL	ARHGAP27	0.238623	0.589642	1.3051	0.99965	UP
hsa-miR-193b-5p	27.1615	30.9261	1.1386	0.187264	0.886974	NEUTRAL	ARHGAP27	0.238623	0.589642	1.3051	0.99965	UP
hsa-miR-210-5p	332.728	350.791	1.05429	0.0762664	0.926502	NEUTRAL	ARHGAP27	0.238623	0.589642	1.3051	0.99965	UP
hsa-miR-210-5p	332.728	350.791	1.05429	0.0762664	0.926502	NEUTRAL	ARHGAP27	0.238623	0.589642	1.3051	0.99965	UP
hsa-miR-210-5p	332.728	350.791	1.05429	0.0762664	0.926502	NEUTRAL	ARHGAP27	0.238623	0.589642	1.3051	0.99965	UP
hsa-miR-210-5p	332.728	350.791	1.05429	0.0762664	0.926502	NEUTRAL	ARHGAP27	0.238623	0.589642	1.3051	0.99965	UP
hsa-miR-210-5p	332.728	350.791	1.05429	0.0762664	0.926502	NEUTRAL	ARHGAP27	0.238623	0.589642	1.3051	0.99965	UP
hsa-miR-210-5p	332.728	350.791	1.05429	0.0762664	0.926502	NEUTRAL	ARHGAP27	0.238623	0.589642	1.3051	0.99965	UP
hsa-miR-210-5p	332.728	350.791	1.05429	0.0762664	0.926502	NEUTRAL	ARHGAP27	0.238623	0.589642	1.3051	0.99965	UP
hsa-miR-210-5p	332.728	350.791	1.05429	0.0762664	0.926502	NEUTRAL	ARHGAP27	0.238623	0.589642	1.3051	0.99965	UP
hsa-miR-3065-3p	15.8442	15.9049	1.00383	0.00551359	1	NEUTRAL	ARHGAP27	0.238623	0.589642	1.3051	0.99965	UP
hsa-miR-324-3p	18.1077	17.6721	0.975945	-0.0351284	1	NEUTRAL	ARHGAP27	0.238623	0.589642	1.3051	0.99965	UP
hsa-miR-665	33.9519	32.6933	0.962932	-0.0544937	0.990546	NEUTRAL	ARHGAP27	0.238623	0.589642	1.3051	0.99965	UP
hsa-miR-665	33.9519	32.6933	0.962932	-0.0544937	0.990546	NEUTRAL	ARHGAP27	0.238623	0.589642	1.3051	0.99965	UP
hsa-miR-665	33.9519	32.6933	0.962932	-0.0544937	0.990546	NEUTRAL	ARHGAP27	0.238623	0.589642	1.3051	0.99965	UP
hsa-miR-665	33.9519	32.6933	0.962932	-0.0544937	0.990546	NEUTRAL	ARHGAP27	0.238623	0.589642	1.3051	0.99965	UP
hsa-miR-665	33.9519	32.6933	0.962932	-0.0544937	0.990546	NEUTRAL	ARHGAP27	0.238623	0.589642	1.3051	0.99965	UP
hsa-miR-665	33.9519	32.6933	0.962932	-0.0544937	0.990546	NEUTRAL	ARHGAP27	0.238623	0.589642	1.3051	0.99965	UP
hsa-miR-665	33.9519	32.6933	0.962932	-0.0544937	0.990546	NEUTRAL	ARHGAP27	0.238623	0.589642	1.3051	0.99965	UP
hsa-miR-665	33.9519	32.6933	0.962932	-0.0544937	0.990546	NEUTRAL	ARHGAP27	0.238623	0.589642	1.3051	0.99965	UP
hsa-miR-665	33.9519	32.6933	0.962932	-0.0544937	0.990546	NEUTRAL	ARHGAP27	0.238623	0.589642	1.3051	0.99965	UP
hsa-miR-665	33.9519	32.6933	0.962932	-0.0544937	0.990546	NEUTRAL	ARHGAP27	0.238623	0.589642	1.3051	0.99965	UP
hsa-miR-665	33.9519	32.6933	0.962932	-0.0544937	0.990546	NEUTRAL	ARHGAP27	0.238623	0.589642	1.3051	0.99965	UP
hsa-miR-665	33.9519	32.6933	0.962932	-0.0544937	0.990546	NEUTRAL	ARHGAP27	0.238623	0.589642	1.3051	0.99965	UP
hsa-miR-665	33.9519	32.6933	0.962932	-0.0544937	0.990546	NEUTRAL	ARHGAP27	0.238623	0.589642	1.3051	0.99965	UP
hsa-miR-665	33.9519	32.6933	0.962932	-0.0544937	0.990546	NEUTRAL	ARHGAP27	0.238623	0.589642	1.3051	0.99965	UP
hsa-miR-296-5p	15.8442	13.2541	0.836524	-0.257521	0.879313	NEUTRAL	ARHGAP27	0.238623	0.589642	1.3051	0.99965	UP
hsa-miR-146b-3p	18.1077	3.53442	0.195189	-2.35706	0.0605725	DOWN	ARHGAP27	0.238623	0.589642	1.3051	0.99965	UP
hsa-miR-23a-5p	107.514	106.916	0.994436	-0.00804886	1	NEUTRAL	CFL1P1	0.924306	2.26233	1.29137	0.99965	UP
hsa-miR-766-3p	12.449	16.7885	1.34858	0.431439	0.754984	NEUTRAL	GOLGA6L10	0.232064	0.565023	1.28378	0.99965	UP
hsa-miR-766-3p	12.449	16.7885	1.34858	0.431439	0.754984	NEUTRAL	GOLGA6L10	0.232064	0.565023	1.28378	0.99965	UP
hsa-miR-766-3p	12.449	16.7885	1.34858	0.431439	0.754984	NEUTRAL	GOLGA6L10	0.232064	0.565023	1.28378	0.99965	UP
hsa-miR-5787	12.449	3068.76	246.506	7.94548	1.13133e-14	UP	CABP1	0.161286	0.390926	1.27727	0.99965	UP
hsa-miR-1285-3p	115.436	132.541	1.14817	0.199337	0.816678	NEUTRAL	CABP1	0.161286	0.390926	1.27727	0.99965	UP
hsa-miR-665	33.9519	32.6933	0.962932	-0.0544937	0.990546	NEUTRAL	CABP1	0.161286	0.390926	1.27727	0.99965	UP
hsa-miR-665	33.9519	32.6933	0.962932	-0.0544937	0.990546	NEUTRAL	CABP1	0.161286	0.390926	1.27727	0.99965	UP
hsa-miR-665	33.9519	32.6933	0.962932	-0.0544937	0.990546	NEUTRAL	CABP1	0.161286	0.390926	1.27727	0.99965	UP
hsa-miR-665	33.9519	32.6933	0.962932	-0.0544937	0.990546	NEUTRAL	CABP1	0.161286	0.390926	1.27727	0.99965	UP
hsa-miR-665	33.9519	32.6933	0.962932	-0.0544937	0.990546	NEUTRAL	CABP1	0.161286	0.390926	1.27727	0.99965	UP
hsa-miR-4466	12.449	7.06883	0.567822	-0.816488	0.536058	NEUTRAL	CABP1	0.161286	0.390926	1.27727	0.99965	UP
hsa-miR-4516	14.7125	26.5081	1.80174	0.849394	0.44668	NEUTRAL	HES4	0.430655	1.04288	1.27597	0.99965	UP
hsa-miR-4516	14.7125	26.5081	1.80174	0.849394	0.44668	NEUTRAL	HES4	0.430655	1.04288	1.27597	0.99965	UP
hsa-miR-4516	14.7125	26.5081	1.80174	0.849394	0.44668	NEUTRAL	HES4	0.430655	1.04288	1.27597	0.99965	UP
hsa-miR-4516	14.7125	26.5081	1.80174	0.849394	0.44668	NEUTRAL	HES4	0.430655	1.04288	1.27597	0.99965	UP
hsa-miR-3200-3p	14.7125	13.2541	0.900872	-0.150606	0.963914	NEUTRAL	HES4	0.430655	1.04288	1.27597	0.99965	UP
hsa-miR-3200-3p	14.7125	13.2541	0.900872	-0.150606	0.963914	NEUTRAL	HES4	0.430655	1.04288	1.27597	0.99965	UP
hsa-miR-128-1-5p	19.2394	20.3229	1.05632	0.0790426	0.997233	NEUTRAL	TSPAN15	0.443228	1.0692	1.2704	0.99965	UP
hsa-miR-128-1-5p	19.2394	20.3229	1.05632	0.0790426	0.997233	NEUTRAL	TSPAN15	0.443228	1.0692	1.2704	0.99965	UP
hsa-miR-128-1-5p	19.2394	20.3229	1.05632	0.0790426	0.997233	NEUTRAL	TSPAN15	0.443228	1.0692	1.2704	0.99965	UP
hsa-miR-484	1291.3	1132.78	0.877238	-0.188959	0.800823	NEUTRAL	TSPAN15	0.443228	1.0692	1.2704	0.99965	UP
hsa-miR-185-3p	5.65864	12.3705	2.18612	1.12837	0.393641	UP	PLEKHA7	0.235832	0.566099	1.26329	0.99965	UP
hsa-miR-185-3p	5.65864	12.3705	2.18612	1.12837	0.393641	UP	PLEKHA7	0.235832	0.566099	1.26329	0.99965	UP
hsa-miR-185-3p	5.65864	12.3705	2.18612	1.12837	0.393641	UP	PLEKHA7	0.235832	0.566099	1.26329	0.99965	UP
hsa-miR-185-3p	5.65864	12.3705	2.18612	1.12837	0.393641	UP	PLEKHA7	0.235832	0.566099	1.26329	0.99965	UP
hsa-miR-185-3p	5.65864	12.3705	2.18612	1.12837	0.393641	UP	PLEKHA7	0.235832	0.566099	1.26329	0.99965	UP
hsa-miR-185-3p	5.65864	12.3705	2.18612	1.12837	0.393641	UP	PLEKHA7	0.235832	0.566099	1.26329	0.99965	UP
hsa-miR-671-5p	56.5864	116.636	2.0612	1.04348	0.222883	UP	PLEKHA7	0.235832	0.566099	1.26329	0.99965	UP
hsa-miR-148b-5p	186.735	361.394	1.93533	0.952578	0.229254	NEUTRAL	PLEKHA7	0.235832	0.566099	1.26329	0.99965	UP
hsa-miR-148b-5p	186.735	361.394	1.93533	0.952578	0.229254	NEUTRAL	PLEKHA7	0.235832	0.566099	1.26329	0.99965	UP
hsa-miR-148b-5p	186.735	361.394	1.93533	0.952578	0.229254	NEUTRAL	PLEKHA7	0.235832	0.566099	1.26329	0.99965	UP
hsa-miR-148b-5p	186.735	361.394	1.93533	0.952578	0.229254	NEUTRAL	PLEKHA7	0.235832	0.566099	1.26329	0.99965	UP
hsa-miR-148b-5p	186.735	361.394	1.93533	0.952578	0.229254	NEUTRAL	PLEKHA7	0.235832	0.566099	1.26329	0.99965	UP
hsa-miR-330-5p	63.3768	63.6195	1.00383	0.00551359	1	NEUTRAL	PLEKHA7	0.235832	0.566099	1.26329	0.99965	UP
hsa-miR-324-3p	18.1077	17.6721	0.975945	-0.0351284	1	NEUTRAL	PLEKHA7	0.235832	0.566099	1.26329	0.99965	UP
hsa-miR-324-3p	18.1077	17.6721	0.975945	-0.0351284	1	NEUTRAL	PLEKHA7	0.235832	0.566099	1.26329	0.99965	UP
hsa-miR-324-3p	18.1077	17.6721	0.975945	-0.0351284	1	NEUTRAL	PLEKHA7	0.235832	0.566099	1.26329	0.99965	UP
hsa-miR-324-3p	18.1077	17.6721	0.975945	-0.0351284	1	NEUTRAL	PLEKHA7	0.235832	0.566099	1.26329	0.99965	UP
hsa-miR-324-3p	18.1077	17.6721	0.975945	-0.0351284	1	NEUTRAL	PLEKHA7	0.235832	0.566099	1.26329	0.99965	UP
hsa-miR-324-3p	18.1077	17.6721	0.975945	-0.0351284	1	NEUTRAL	PLEKHA7	0.235832	0.566099	1.26329	0.99965	UP
hsa-miR-1275	31.6884	25.6245	0.80864	-0.30643	0.788386	NEUTRAL	PLEKHA7	0.235832	0.566099	1.26329	0.99965	UP
hsa-miR-1275	31.6884	25.6245	0.80864	-0.30643	0.788386	NEUTRAL	PLEKHA7	0.235832	0.566099	1.26329	0.99965	UP
hsa-miR-34a-5p	1668.17	2292.95	1.37453	0.458942	0.5311	NEUTRAL	SAMD15	0.165056	0.391184	1.24489	0.99965	UP
hsa-miR-24-3p	1576.5	1563.98	0.992059	-0.0115024	0.988146	NEUTRAL	RNF149	16.9437	39.4202	1.21819	0.99965	UP
hsa-miR-24-3p	1576.5	1563.98	0.992059	-0.0115024	0.988146	NEUTRAL	RNF149	16.9437	39.4202	1.21819	0.99965	UP
hsa-miR-24-3p	1576.5	1563.98	0.992059	-0.0115024	0.988146	NEUTRAL	RNF149	16.9437	39.4202	1.21819	0.99965	UP
hsa-miR-24-3p	1576.5	1563.98	0.992059	-0.0115024	0.988146	NEUTRAL	RNF149	16.9437	39.4202	1.21819	0.99965	UP
hsa-miR-3074-5p	30.5567	30.0425	0.983174	-0.0244812	1	NEUTRAL	RNF149	16.9437	39.4202	1.21819	0.99965	UP
hsa-miR-3074-5p	30.5567	30.0425	0.983174	-0.0244812	1	NEUTRAL	RNF149	16.9437	39.4202	1.21819	0.99965	UP
hsa-miR-3074-5p	30.5567	30.0425	0.983174	-0.0244812	1	NEUTRAL	RNF149	16.9437	39.4202	1.21819	0.99965	UP
hsa-miR-3074-5p	30.5567	30.0425	0.983174	-0.0244812	1	NEUTRAL	RNF149	16.9437	39.4202	1.21819	0.99965	UP
hsa-miR-877-5p	19.2394	15.9049	0.826683	-0.274594	0.850366	NEUTRAL	RNF149	16.9437	39.4202	1.21819	0.99965	UP
hsa-miR-877-5p	19.2394	15.9049	0.826683	-0.274594	0.850366	NEUTRAL	RNF149	16.9437	39.4202	1.21819	0.99965	UP
hsa-miR-3195	3291.07	0.883604	0.000268486	-11.8629	8.95904e-20	DOWN	RNF149	16.9437	39.4202	1.21819	0.99965	UP
hsa-miR-3195	3291.07	0.883604	0.000268486	-11.8629	8.95904e-20	DOWN	RNF149	16.9437	39.4202	1.21819	0.99965	UP
hsa-miR-874-5p	14.7125	30.0425	2.04198	1.02997	0.342866	UP	HSD17B1P1	0.166054	0.383868	1.20896	0.99965	UP
hsa-miR-140-3p	2351.73	11396.7	4.8461	2.27682	0.0013695	UP	LRRC69,SLC26A7	0.200885	0.463236	1.20538	0.99965	UP
hsa-let-7g-3p	11.3173	23.8573	2.10804	1.0759	0.347457	UP	LRRC69,SLC26A7	0.200885	0.463236	1.20538	0.99965	UP
hsa-let-7g-3p	11.3173	23.8573	2.10804	1.0759	0.347457	UP	LRRC69,SLC26A7	0.200885	0.463236	1.20538	0.99965	UP
hsa-let-7g-3p	11.3173	23.8573	2.10804	1.0759	0.347457	UP	LRRC69,SLC26A7	0.200885	0.463236	1.20538	0.99965	UP
hsa-let-7g-3p	11.3173	23.8573	2.10804	1.0759	0.347457	UP	LRRC69,SLC26A7	0.200885	0.463236	1.20538	0.99965	UP
hsa-let-7g-3p	11.3173	23.8573	2.10804	1.0759	0.347457	UP	LRRC69,SLC26A7	0.200885	0.463236	1.20538	0.99965	UP
hsa-let-7g-3p	11.3173	23.8573	2.10804	1.0759	0.347457	UP	LRRC69,SLC26A7	0.200885	0.463236	1.20538	0.99965	UP
hsa-let-7g-3p	11.3173	23.8573	2.10804	1.0759	0.347457	UP	LRRC69,SLC26A7	0.200885	0.463236	1.20538	0.99965	UP
hsa-miR-887-5p	6.79037	9.71964	1.43139	0.517413	0.759969	NEUTRAL	LRRC69,SLC26A7	0.200885	0.463236	1.20538	0.99965	UP
hsa-miR-887-5p	6.79037	9.71964	1.43139	0.517413	0.759969	NEUTRAL	LRRC69,SLC26A7	0.200885	0.463236	1.20538	0.99965	UP
hsa-miR-887-5p	6.79037	9.71964	1.43139	0.517413	0.759969	NEUTRAL	LRRC69,SLC26A7	0.200885	0.463236	1.20538	0.99965	UP
hsa-miR-887-5p	6.79037	9.71964	1.43139	0.517413	0.759969	NEUTRAL	LRRC69,SLC26A7	0.200885	0.463236	1.20538	0.99965	UP
hsa-miR-887-5p	6.79037	9.71964	1.43139	0.517413	0.759969	NEUTRAL	LRRC69,SLC26A7	0.200885	0.463236	1.20538	0.99965	UP
hsa-miR-887-5p	6.79037	9.71964	1.43139	0.517413	0.759969	NEUTRAL	LRRC69,SLC26A7	0.200885	0.463236	1.20538	0.99965	UP
hsa-miR-887-5p	6.79037	9.71964	1.43139	0.517413	0.759969	NEUTRAL	LRRC69,SLC26A7	0.200885	0.463236	1.20538	0.99965	UP
hsa-miR-26a-5p	85407	93176	1.09096	0.125604	0.81459	NEUTRAL	LRRC69,SLC26A7	0.200885	0.463236	1.20538	0.99965	UP
hsa-miR-324-3p	18.1077	17.6721	0.975945	-0.0351284	1	NEUTRAL	MKRN3	0.255902	0.585882	1.19502	0.99965	UP
hsa-miR-324-3p	18.1077	17.6721	0.975945	-0.0351284	1	NEUTRAL	MKRN3	0.255902	0.585882	1.19502	0.99965	UP
hsa-miR-665	33.9519	32.6933	0.962932	-0.0544937	0.990546	NEUTRAL	MKRN3	0.255902	0.585882	1.19502	0.99965	UP
hsa-miR-4488	3153	1214.07	0.385053	-1.37687	0.0624724	DOWN	MKRN3	0.255902	0.585882	1.19502	0.99965	UP
hsa-miR-4488	3153	1214.07	0.385053	-1.37687	0.0624724	DOWN	MKRN3	0.255902	0.585882	1.19502	0.99965	UP
hsa-miR-4488	3153	1214.07	0.385053	-1.37687	0.0624724	DOWN	MKRN3	0.255902	0.585882	1.19502	0.99965	UP
hsa-miR-3176	13.5807	32.6933	2.40733	1.26743	0.238661	UP	RP11-1023L17.1	0.521812	1.19465	1.19499	0.99965	UP
hsa-miR-339-5p	38.4788	199.694	5.18973	2.37566	0.00610349	UP	C19orf81	0.421179	0.954713	1.18064	0.99965	UP
hsa-miR-339-5p	38.4788	199.694	5.18973	2.37566	0.00610349	UP	C19orf81	0.421179	0.954713	1.18064	0.99965	UP
hsa-miR-615-3p	221.819	531.046	2.39405	1.25945	0.110381	UP	C19orf81	0.421179	0.954713	1.18064	0.99965	UP
hsa-miR-615-3p	221.819	531.046	2.39405	1.25945	0.110381	UP	C19orf81	0.421179	0.954713	1.18064	0.99965	UP
hsa-miR-484	1291.3	1132.78	0.877238	-0.188959	0.800823	NEUTRAL	C19orf81	0.421179	0.954713	1.18064	0.99965	UP
hsa-miR-668-3p	49.7961	23.8573	0.4791	-1.0616	0.273393	DOWN	C19orf81	0.421179	0.954713	1.18064	0.99965	UP
hsa-miR-497-5p	450.428	230.621	0.512003	-0.965775	0.218946	NEUTRAL	SEPP1	0.177501	0.401412	1.17726	0.99965	UP
hsa-miR-2277-5p	35.0836	47.7146	1.36003	0.443635	0.654588	NEUTRAL	CHRNA5	0.218847	0.494665	1.17653	0.99965	UP
hsa-miR-2277-5p	35.0836	47.7146	1.36003	0.443635	0.654588	NEUTRAL	CHRNA5	0.218847	0.494665	1.17653	0.99965	UP
hsa-miR-3176	13.5807	32.6933	2.40733	1.26743	0.238661	UP	IL21R	0.202639	0.457073	1.17351	0.99965	UP
hsa-miR-3176	13.5807	32.6933	2.40733	1.26743	0.238661	UP	IL21R	0.202639	0.457073	1.17351	0.99965	UP
hsa-miR-3176	13.5807	32.6933	2.40733	1.26743	0.238661	UP	IL21R	0.202639	0.457073	1.17351	0.99965	UP
hsa-miR-615-3p	221.819	531.046	2.39405	1.25945	0.110381	UP	RNF207	2.07351	4.67687	1.17347	0.99965	UP
hsa-miR-615-3p	221.819	531.046	2.39405	1.25945	0.110381	UP	RNF207	2.07351	4.67687	1.17347	0.99965	UP
hsa-miR-615-3p	221.819	531.046	2.39405	1.25945	0.110381	UP	RNF207	2.07351	4.67687	1.17347	0.99965	UP
hsa-miR-2277-5p	35.0836	47.7146	1.36003	0.443635	0.654588	NEUTRAL	RNF207	2.07351	4.67687	1.17347	0.99965	UP
hsa-miR-766-3p	12.449	16.7885	1.34858	0.431439	0.754984	NEUTRAL	RNF207	2.07351	4.67687	1.17347	0.99965	UP
hsa-miR-766-3p	12.449	16.7885	1.34858	0.431439	0.754984	NEUTRAL	RNF207	2.07351	4.67687	1.17347	0.99965	UP
hsa-miR-1285-3p	115.436	132.541	1.14817	0.199337	0.816678	NEUTRAL	RNF207	2.07351	4.67687	1.17347	0.99965	UP
hsa-miR-1285-3p	115.436	132.541	1.14817	0.199337	0.816678	NEUTRAL	RNF207	2.07351	4.67687	1.17347	0.99965	UP
hsa-miR-210-5p	332.728	350.791	1.05429	0.0762664	0.926502	NEUTRAL	RNF207	2.07351	4.67687	1.17347	0.99965	UP
hsa-miR-210-5p	332.728	350.791	1.05429	0.0762664	0.926502	NEUTRAL	RNF207	2.07351	4.67687	1.17347	0.99965	UP
hsa-miR-493-3p	932.545	1024.1	1.09817	0.135108	0.859404	NEUTRAL	ZC2HC1C	0.314006	0.708247	1.17346	0.99965	UP
hsa-miR-4532	43237.7	8708.8	0.201417	-2.31174	0.000347847	DOWN	ZC2HC1C	0.314006	0.708247	1.17346	0.99965	UP
hsa-miR-3180-3p	10.1856	13.2541	1.30126	0.379909	0.813853	NEUTRAL	KBTBD3	0.864468	1.94813	1.17221	0.99965	UP
hsa-miR-210-5p	332.728	350.791	1.05429	0.0762664	0.926502	NEUTRAL	GTF2IRD2B	0.683963	1.54029	1.17121	0.99965	UP
hsa-miR-210-5p	332.728	350.791	1.05429	0.0762664	0.926502	NEUTRAL	GTF2IRD2B	0.683963	1.54029	1.17121	0.99965	UP
hsa-miR-210-5p	332.728	350.791	1.05429	0.0762664	0.926502	NEUTRAL	GTF2IRD2B	0.683963	1.54029	1.17121	0.99965	UP
hsa-miR-210-5p	332.728	350.791	1.05429	0.0762664	0.926502	NEUTRAL	GTF2IRD2B	0.683963	1.54029	1.17121	0.99965	UP
hsa-miR-17-3p	71.2989	78.6408	1.10297	0.141397	0.885418	NEUTRAL	RFX3	0.366277	0.823462	1.16877	0.99965	UP
hsa-miR-17-3p	71.2989	78.6408	1.10297	0.141397	0.885418	NEUTRAL	RFX3	0.366277	0.823462	1.16877	0.99965	UP
hsa-miR-214-5p	579.445	501.003	0.864626	-0.209852	0.786651	NEUTRAL	RFX3	0.366277	0.823462	1.16877	0.99965	UP
hsa-miR-214-5p	579.445	501.003	0.864626	-0.209852	0.786651	NEUTRAL	RFX3	0.366277	0.823462	1.16877	0.99965	UP
hsa-miR-214-5p	579.445	501.003	0.864626	-0.209852	0.786651	NEUTRAL	RFX3	0.366277	0.823462	1.16877	0.99965	UP
hsa-miR-214-5p	579.445	501.003	0.864626	-0.209852	0.786651	NEUTRAL	RFX3	0.366277	0.823462	1.16877	0.99965	UP
hsa-miR-1260b	14.7125	12.3705	0.840814	-0.250141	0.891114	NEUTRAL	RFX3	0.366277	0.823462	1.16877	0.99965	UP
hsa-miR-1260b	14.7125	12.3705	0.840814	-0.250141	0.891114	NEUTRAL	RFX3	0.366277	0.823462	1.16877	0.99965	UP
hsa-miR-1260b	14.7125	12.3705	0.840814	-0.250141	0.891114	NEUTRAL	RFX3	0.366277	0.823462	1.16877	0.99965	UP
hsa-miR-1260b	14.7125	12.3705	0.840814	-0.250141	0.891114	NEUTRAL	RFX3	0.366277	0.823462	1.16877	0.99965	UP
hsa-miR-1260b	14.7125	12.3705	0.840814	-0.250141	0.891114	NEUTRAL	RFX3	0.366277	0.823462	1.16877	0.99965	UP
hsa-miR-1260b	14.7125	12.3705	0.840814	-0.250141	0.891114	NEUTRAL	RFX3	0.366277	0.823462	1.16877	0.99965	UP
hsa-miR-1260b	14.7125	12.3705	0.840814	-0.250141	0.891114	NEUTRAL	RFX3	0.366277	0.823462	1.16877	0.99965	UP
hsa-miR-1260b	14.7125	12.3705	0.840814	-0.250141	0.891114	NEUTRAL	RFX3	0.366277	0.823462	1.16877	0.99965	UP
hsa-miR-1260b	14.7125	12.3705	0.840814	-0.250141	0.891114	NEUTRAL	RFX3	0.366277	0.823462	1.16877	0.99965	UP
hsa-miR-3180-3p	10.1856	13.2541	1.30126	0.379909	0.813853	NEUTRAL	BCL2	0.181539	0.407033	1.16486	0.99965	UP
hsa-miR-3180-3p	10.1856	13.2541	1.30126	0.379909	0.813853	NEUTRAL	BCL2	0.181539	0.407033	1.16486	0.99965	UP
hsa-miR-3180-3p	10.1856	13.2541	1.30126	0.379909	0.813853	NEUTRAL	BCL2	0.181539	0.407033	1.16486	0.99965	UP
hsa-miR-24-3p	1576.5	1563.98	0.992059	-0.0115024	0.988146	NEUTRAL	BCL2	0.181539	0.407033	1.16486	0.99965	UP
hsa-miR-24-3p	1576.5	1563.98	0.992059	-0.0115024	0.988146	NEUTRAL	BCL2	0.181539	0.407033	1.16486	0.99965	UP
hsa-miR-1268b	70.1672	68.9211	0.982241	-0.0258506	0.995133	NEUTRAL	BCL2	0.181539	0.407033	1.16486	0.99965	UP
hsa-miR-1268b	70.1672	68.9211	0.982241	-0.0258506	0.995133	NEUTRAL	BCL2	0.181539	0.407033	1.16486	0.99965	UP
hsa-miR-1268b	70.1672	68.9211	0.982241	-0.0258506	0.995133	NEUTRAL	BCL2	0.181539	0.407033	1.16486	0.99965	UP
hsa-miR-4466	12.449	7.06883	0.567822	-0.816488	0.536058	NEUTRAL	BCL2	0.181539	0.407033	1.16486	0.99965	UP
hsa-miR-4466	12.449	7.06883	0.567822	-0.816488	0.536058	NEUTRAL	BCL2	0.181539	0.407033	1.16486	0.99965	UP
hsa-miR-4466	12.449	7.06883	0.567822	-0.816488	0.536058	NEUTRAL	BCL2	0.181539	0.407033	1.16486	0.99965	UP
hsa-miR-3960	12.449	0.883604	0.0709778	-3.81649	0.016522	DOWN	BCL2	0.181539	0.407033	1.16486	0.99965	UP
hsa-miR-331-3p	379.129	285.404	0.752789	-0.409683	0.601587	NEUTRAL	APOL3	1.03729	2.31905	1.16071	0.99965	UP
hsa-miR-331-3p	379.129	285.404	0.752789	-0.409683	0.601587	NEUTRAL	APOL3	1.03729	2.31905	1.16071	0.99965	UP
hsa-miR-665	33.9519	32.6933	0.962932	-0.0544937	0.990546	NEUTRAL	SPP2	0.202983	0.453712	1.16042	0.99965	UP
hsa-miR-665	33.9519	32.6933	0.962932	-0.0544937	0.990546	NEUTRAL	SPP2	0.202983	0.453712	1.16042	0.99965	UP
hsa-miR-665	33.9519	32.6933	0.962932	-0.0544937	0.990546	NEUTRAL	SPP2	0.202983	0.453712	1.16042	0.99965	UP
hsa-miR-5787	12.449	3068.76	246.506	7.94548	1.13133e-14	UP	PPP2R3B	1.91159	4.26796	1.15878	0.99965	UP
hsa-miR-5787	12.449	3068.76	246.506	7.94548	1.13133e-14	UP	PPP2R3B	1.91159	4.26796	1.15878	0.99965	UP
hsa-miR-7706	53.1913	61.8523	1.16283	0.217638	0.825481	NEUTRAL	PPP2R3B	1.91159	4.26796	1.15878	0.99965	UP
hsa-miR-1285-3p	115.436	132.541	1.14817	0.199337	0.816678	NEUTRAL	PPP2R3B	1.91159	4.26796	1.15878	0.99965	UP
hsa-miR-654-5p	44.1374	49.4818	1.12109	0.164896	0.881604	NEUTRAL	PPP2R3B	1.91159	4.26796	1.15878	0.99965	UP
hsa-miR-23a-5p	107.514	106.916	0.994436	-0.00804886	1	NEUTRAL	PPP2R3B	1.91159	4.26796	1.15878	0.99965	UP
hsa-miR-23a-5p	107.514	106.916	0.994436	-0.00804886	1	NEUTRAL	PPP2R3B	1.91159	4.26796	1.15878	0.99965	UP
hsa-miR-23a-5p	107.514	106.916	0.994436	-0.00804886	1	NEUTRAL	PPP2R3B	1.91159	4.26796	1.15878	0.99965	UP
hsa-miR-23a-5p	107.514	106.916	0.994436	-0.00804886	1	NEUTRAL	PPP2R3B	1.91159	4.26796	1.15878	0.99965	UP
hsa-miR-4488	3153	1214.07	0.385053	-1.37687	0.0624724	DOWN	PPP2R3B	1.91159	4.26796	1.15878	0.99965	UP
hsa-miR-4488	3153	1214.07	0.385053	-1.37687	0.0624724	DOWN	PPP2R3B	1.91159	4.26796	1.15878	0.99965	UP
hsa-miR-370-3p	169.759	161.7	0.952522	-0.0701753	0.937972	NEUTRAL	RTKN2	0.275724	0.614242	1.15558	0.99965	UP
hsa-miR-370-3p	169.759	161.7	0.952522	-0.0701753	0.937972	NEUTRAL	RTKN2	0.275724	0.614242	1.15558	0.99965	UP
hsa-miR-3176	13.5807	32.6933	2.40733	1.26743	0.238661	UP	ZNF608	0.189862	0.419578	1.14399	0.99965	UP
hsa-miR-3176	13.5807	32.6933	2.40733	1.26743	0.238661	UP	ZNF608	0.189862	0.419578	1.14399	0.99965	UP
hsa-miR-3176	13.5807	32.6933	2.40733	1.26743	0.238661	UP	ZNF608	0.189862	0.419578	1.14399	0.99965	UP
hsa-miR-3176	13.5807	32.6933	2.40733	1.26743	0.238661	UP	ZNF608	0.189862	0.419578	1.14399	0.99965	UP
hsa-miR-1304-3p	156.179	189.091	1.21074	0.275886	0.736427	NEUTRAL	ZNF608	0.189862	0.419578	1.14399	0.99965	UP
hsa-miR-1304-3p	156.179	189.091	1.21074	0.275886	0.736427	NEUTRAL	ZNF608	0.189862	0.419578	1.14399	0.99965	UP
hsa-miR-1304-3p	156.179	189.091	1.21074	0.275886	0.736427	NEUTRAL	ZNF608	0.189862	0.419578	1.14399	0.99965	UP
hsa-miR-1304-3p	156.179	189.091	1.21074	0.275886	0.736427	NEUTRAL	ZNF608	0.189862	0.419578	1.14399	0.99965	UP
hsa-miR-3065-3p	15.8442	15.9049	1.00383	0.00551359	1	NEUTRAL	ZNF608	0.189862	0.419578	1.14399	0.99965	UP
hsa-miR-3065-3p	15.8442	15.9049	1.00383	0.00551359	1	NEUTRAL	ZNF608	0.189862	0.419578	1.14399	0.99965	UP
hsa-miR-3065-3p	15.8442	15.9049	1.00383	0.00551359	1	NEUTRAL	ZNF608	0.189862	0.419578	1.14399	0.99965	UP
hsa-miR-3065-3p	15.8442	15.9049	1.00383	0.00551359	1	NEUTRAL	ZNF608	0.189862	0.419578	1.14399	0.99965	UP
hsa-miR-940	5.65864	13.2541	2.34227	1.22791	0.344393	UP	ARHGAP33	0.622358	1.35073	1.11793	0.99965	UP
hsa-miR-940	5.65864	13.2541	2.34227	1.22791	0.344393	UP	ARHGAP33	0.622358	1.35073	1.11793	0.99965	UP
hsa-miR-940	5.65864	13.2541	2.34227	1.22791	0.344393	UP	ARHGAP33	0.622358	1.35073	1.11793	0.99965	UP
hsa-miR-940	5.65864	13.2541	2.34227	1.22791	0.344393	UP	ARHGAP33	0.622358	1.35073	1.11793	0.99965	UP
hsa-miR-345-5p	449.296	447.987	0.997086	-0.00420975	0.998615	NEUTRAL	ARHGAP33	0.622358	1.35073	1.11793	0.99965	UP
hsa-miR-345-5p	449.296	447.987	0.997086	-0.00420975	0.998615	NEUTRAL	ARHGAP33	0.622358	1.35073	1.11793	0.99965	UP
hsa-miR-345-5p	449.296	447.987	0.997086	-0.00420975	0.998615	NEUTRAL	ARHGAP33	0.622358	1.35073	1.11793	0.99965	UP
hsa-miR-345-5p	449.296	447.987	0.997086	-0.00420975	0.998615	NEUTRAL	ARHGAP33	0.622358	1.35073	1.11793	0.99965	UP
hsa-miR-345-5p	449.296	447.987	0.997086	-0.00420975	0.998615	NEUTRAL	ARHGAP33	0.622358	1.35073	1.11793	0.99965	UP
hsa-miR-345-5p	449.296	447.987	0.997086	-0.00420975	0.998615	NEUTRAL	ARHGAP33	0.622358	1.35073	1.11793	0.99965	UP
hsa-miR-345-5p	449.296	447.987	0.997086	-0.00420975	0.998615	NEUTRAL	ARHGAP33	0.622358	1.35073	1.11793	0.99965	UP
hsa-miR-331-3p	379.129	285.404	0.752789	-0.409683	0.601587	NEUTRAL	ARHGAP33	0.622358	1.35073	1.11793	0.99965	UP
hsa-miR-331-3p	379.129	285.404	0.752789	-0.409683	0.601587	NEUTRAL	ARHGAP33	0.622358	1.35073	1.11793	0.99965	UP
hsa-miR-331-3p	379.129	285.404	0.752789	-0.409683	0.601587	NEUTRAL	ARHGAP33	0.622358	1.35073	1.11793	0.99965	UP
hsa-miR-331-3p	379.129	285.404	0.752789	-0.409683	0.601587	NEUTRAL	ARHGAP33	0.622358	1.35073	1.11793	0.99965	UP
hsa-miR-331-3p	379.129	285.404	0.752789	-0.409683	0.601587	NEUTRAL	ARHGAP33	0.622358	1.35073	1.11793	0.99965	UP
hsa-miR-331-3p	379.129	285.404	0.752789	-0.409683	0.601587	NEUTRAL	ARHGAP33	0.622358	1.35073	1.11793	0.99965	UP
hsa-miR-331-3p	379.129	285.404	0.752789	-0.409683	0.601587	NEUTRAL	ARHGAP33	0.622358	1.35073	1.11793	0.99965	UP
hsa-miR-4466	12.449	7.06883	0.567822	-0.816488	0.536058	NEUTRAL	ARHGAP33	0.622358	1.35073	1.11793	0.99965	UP
hsa-miR-4466	12.449	7.06883	0.567822	-0.816488	0.536058	NEUTRAL	ARHGAP33	0.622358	1.35073	1.11793	0.99965	UP
hsa-miR-4466	12.449	7.06883	0.567822	-0.816488	0.536058	NEUTRAL	ARHGAP33	0.622358	1.35073	1.11793	0.99965	UP
hsa-miR-4466	12.449	7.06883	0.567822	-0.816488	0.536058	NEUTRAL	ARHGAP33	0.622358	1.35073	1.11793	0.99965	UP
hsa-miR-296-5p	15.8442	13.2541	0.836524	-0.257521	0.879313	NEUTRAL	NCAM2	0.639858	1.38466	1.11371	0.99965	UP
hsa-miR-296-5p	15.8442	13.2541	0.836524	-0.257521	0.879313	NEUTRAL	NCAM2	0.639858	1.38466	1.11371	0.99965	UP
hsa-miR-296-5p	15.8442	13.2541	0.836524	-0.257521	0.879313	NEUTRAL	NCAM2	0.639858	1.38466	1.11371	0.99965	UP
hsa-miR-3117-3p	20.3711	13.2541	0.65063	-0.620091	0.604436	NEUTRAL	NCAM2	0.639858	1.38466	1.11371	0.99965	UP
hsa-miR-3117-3p	20.3711	13.2541	0.65063	-0.620091	0.604436	NEUTRAL	NCAM2	0.639858	1.38466	1.11371	0.99965	UP
hsa-miR-24-3p	1576.5	1563.98	0.992059	-0.0115024	0.988146	NEUTRAL	DBF4B	0.325215	0.691513	1.08836	0.99965	UP
hsa-miR-3074-5p	30.5567	30.0425	0.983174	-0.0244812	1	NEUTRAL	DBF4B	0.325215	0.691513	1.08836	0.99965	UP
hsa-miR-665	33.9519	32.6933	0.962932	-0.0544937	0.990546	NEUTRAL	DBF4B	0.325215	0.691513	1.08836	0.99965	UP
hsa-miR-665	33.9519	32.6933	0.962932	-0.0544937	0.990546	NEUTRAL	DBF4B	0.325215	0.691513	1.08836	0.99965	UP
hsa-miR-665	33.9519	32.6933	0.962932	-0.0544937	0.990546	NEUTRAL	CBWD7	1.68494	3.56472	1.08109	0.99965	UP
hsa-miR-665	33.9519	32.6933	0.962932	-0.0544937	0.990546	NEUTRAL	CBWD7	1.68494	3.56472	1.08109	0.99965	UP
hsa-miR-23b-3p	9967.14	6375.2	0.639622	-0.644708	0.339691	NEUTRAL	CBWD7	1.68494	3.56472	1.08109	0.99965	UP
hsa-miR-665	33.9519	32.6933	0.962932	-0.0544937	0.990546	NEUTRAL	SCNN1A	0.333213	0.704924	1.08103	0.99965	UP
hsa-miR-665	33.9519	32.6933	0.962932	-0.0544937	0.990546	NEUTRAL	SCNN1A	0.333213	0.704924	1.08103	0.99965	UP
hsa-miR-92b-5p	2.26346	11.4869	5.07491	2.34338	0.103638	UP	ZRANB3	1.05715	2.2343	1.07964	0.99965	UP
hsa-miR-92b-5p	2.26346	11.4869	5.07491	2.34338	0.103638	UP	ZRANB3	1.05715	2.2343	1.07964	0.99965	UP
hsa-miR-149-5p	404.027	333.119	0.824496	-0.278416	0.722644	NEUTRAL	C3orf35	0.196495	0.414424	1.07661	0.99965	UP
hsa-miR-149-5p	404.027	333.119	0.824496	-0.278416	0.722644	NEUTRAL	C3orf35	0.196495	0.414424	1.07661	0.99965	UP
hsa-miR-149-5p	404.027	333.119	0.824496	-0.278416	0.722644	NEUTRAL	C3orf35	0.196495	0.414424	1.07661	0.99965	UP
hsa-miR-149-5p	404.027	333.119	0.824496	-0.278416	0.722644	NEUTRAL	C3orf35	0.196495	0.414424	1.07661	0.99965	UP
hsa-miR-874-5p	14.7125	30.0425	2.04198	1.02997	0.342866	UP	ACVR2B	0.300328	0.632789	1.07518	0.99965	UP
hsa-miR-4516	14.7125	26.5081	1.80174	0.849394	0.44668	NEUTRAL	ACVR2B	0.300328	0.632789	1.07518	0.99965	UP
hsa-miR-1285-3p	115.436	132.541	1.14817	0.199337	0.816678	NEUTRAL	ACVR2B	0.300328	0.632789	1.07518	0.99965	UP
hsa-miR-5699-5p	13.5807	14.1377	1.04101	0.057981	1	NEUTRAL	ACVR2B	0.300328	0.632789	1.07518	0.99965	UP
hsa-miR-744-5p	823.899	698.931	0.848321	-0.237317	0.756018	NEUTRAL	ACVR2B	0.300328	0.632789	1.07518	0.99965	UP
hsa-miR-133a-3p	30.5567	13.2541	0.433753	-1.20505	0.260611	DOWN	ACVR2B	0.300328	0.632789	1.07518	0.99965	UP
hsa-miR-940	5.65864	13.2541	2.34227	1.22791	0.344393	UP	NIPAL1	0.183978	0.38759	1.07499	0.99965	UP
hsa-miR-940	5.65864	13.2541	2.34227	1.22791	0.344393	UP	NIPAL1	0.183978	0.38759	1.07499	0.99965	UP
hsa-miR-5787	12.449	3068.76	246.506	7.94548	1.13133e-14	UP	CNNM3	2.62398	5.51839	1.07249	0.99965	UP
hsa-miR-5787	12.449	3068.76	246.506	7.94548	1.13133e-14	UP	CNNM3	2.62398	5.51839	1.07249	0.99965	UP
hsa-miR-671-5p	56.5864	116.636	2.0612	1.04348	0.222883	UP	CNNM3	2.62398	5.51839	1.07249	0.99965	UP
hsa-miR-2277-5p	35.0836	47.7146	1.36003	0.443635	0.654588	NEUTRAL	CNNM3	2.62398	5.51839	1.07249	0.99965	UP
hsa-miR-2277-5p	35.0836	47.7146	1.36003	0.443635	0.654588	NEUTRAL	CNNM3	2.62398	5.51839	1.07249	0.99965	UP
hsa-miR-766-3p	12.449	16.7885	1.34858	0.431439	0.754984	NEUTRAL	CNNM3	2.62398	5.51839	1.07249	0.99965	UP
hsa-miR-766-3p	12.449	16.7885	1.34858	0.431439	0.754984	NEUTRAL	CNNM3	2.62398	5.51839	1.07249	0.99965	UP
hsa-miR-370-3p	169.759	161.7	0.952522	-0.0701753	0.937972	NEUTRAL	CNNM3	2.62398	5.51839	1.07249	0.99965	UP
hsa-miR-370-3p	169.759	161.7	0.952522	-0.0701753	0.937972	NEUTRAL	CNNM3	2.62398	5.51839	1.07249	0.99965	UP
hsa-miR-370-3p	169.759	161.7	0.952522	-0.0701753	0.937972	NEUTRAL	CNNM3	2.62398	5.51839	1.07249	0.99965	UP
hsa-miR-370-3p	169.759	161.7	0.952522	-0.0701753	0.937972	NEUTRAL	CNNM3	2.62398	5.51839	1.07249	0.99965	UP
hsa-miR-665	33.9519	32.6933	0.962932	-0.0544937	0.990546	NEUTRAL	GPR146	0.740951	1.55558	1.07	0.99965	UP
hsa-miR-665	33.9519	32.6933	0.962932	-0.0544937	0.990546	NEUTRAL	GPR146	0.740951	1.55558	1.07	0.99965	UP
hsa-miR-5787	12.449	3068.76	246.506	7.94548	1.13133e-14	UP	CORO6	1.19212	2.50073	1.06882	0.99965	UP
hsa-miR-5787	12.449	3068.76	246.506	7.94548	1.13133e-14	UP	CORO6	1.19212	2.50073	1.06882	0.99965	UP
hsa-miR-1343-3p	6.79037	11.4869	1.69164	0.758421	0.589942	NEUTRAL	CORO6	1.19212	2.50073	1.06882	0.99965	UP
hsa-miR-1343-3p	6.79037	11.4869	1.69164	0.758421	0.589942	NEUTRAL	CORO6	1.19212	2.50073	1.06882	0.99965	UP
hsa-miR-1343-3p	6.79037	11.4869	1.69164	0.758421	0.589942	NEUTRAL	CORO6	1.19212	2.50073	1.06882	0.99965	UP
hsa-miR-1343-3p	6.79037	11.4869	1.69164	0.758421	0.589942	NEUTRAL	CORO6	1.19212	2.50073	1.06882	0.99965	UP
hsa-miR-1343-3p	6.79037	11.4869	1.69164	0.758421	0.589942	NEUTRAL	CORO6	1.19212	2.50073	1.06882	0.99965	UP
hsa-miR-1343-3p	6.79037	11.4869	1.69164	0.758421	0.589942	NEUTRAL	CORO6	1.19212	2.50073	1.06882	0.99965	UP
hsa-miR-1343-3p	6.79037	11.4869	1.69164	0.758421	0.589942	NEUTRAL	CORO6	1.19212	2.50073	1.06882	0.99965	UP
hsa-miR-1343-3p	6.79037	11.4869	1.69164	0.758421	0.589942	NEUTRAL	CORO6	1.19212	2.50073	1.06882	0.99965	UP
hsa-miR-1343-3p	6.79037	11.4869	1.69164	0.758421	0.589942	NEUTRAL	CORO6	1.19212	2.50073	1.06882	0.99965	UP
hsa-miR-485-5p	210.502	274.801	1.30546	0.384555	0.6296	NEUTRAL	CORO6	1.19212	2.50073	1.06882	0.99965	UP
hsa-miR-485-5p	210.502	274.801	1.30546	0.384555	0.6296	NEUTRAL	CORO6	1.19212	2.50073	1.06882	0.99965	UP
hsa-miR-485-5p	210.502	274.801	1.30546	0.384555	0.6296	NEUTRAL	CORO6	1.19212	2.50073	1.06882	0.99965	UP
hsa-miR-485-5p	210.502	274.801	1.30546	0.384555	0.6296	NEUTRAL	CORO6	1.19212	2.50073	1.06882	0.99965	UP
hsa-miR-485-5p	210.502	274.801	1.30546	0.384555	0.6296	NEUTRAL	CORO6	1.19212	2.50073	1.06882	0.99965	UP
hsa-miR-23a-5p	107.514	106.916	0.994436	-0.00804886	1	NEUTRAL	CORO6	1.19212	2.50073	1.06882	0.99965	UP
hsa-miR-874-3p	162.969	147.562	0.90546	-0.143277	0.866022	NEUTRAL	CORO6	1.19212	2.50073	1.06882	0.99965	UP
hsa-miR-874-3p	162.969	147.562	0.90546	-0.143277	0.866022	NEUTRAL	CORO6	1.19212	2.50073	1.06882	0.99965	UP
hsa-miR-874-3p	162.969	147.562	0.90546	-0.143277	0.866022	NEUTRAL	CORO6	1.19212	2.50073	1.06882	0.99965	UP
hsa-miR-874-3p	162.969	147.562	0.90546	-0.143277	0.866022	NEUTRAL	CORO6	1.19212	2.50073	1.06882	0.99965	UP
hsa-miR-874-3p	162.969	147.562	0.90546	-0.143277	0.866022	NEUTRAL	CORO6	1.19212	2.50073	1.06882	0.99965	UP
hsa-miR-874-3p	162.969	147.562	0.90546	-0.143277	0.866022	NEUTRAL	CORO6	1.19212	2.50073	1.06882	0.99965	UP
hsa-miR-874-3p	162.969	147.562	0.90546	-0.143277	0.866022	NEUTRAL	CORO6	1.19212	2.50073	1.06882	0.99965	UP
hsa-miR-874-3p	162.969	147.562	0.90546	-0.143277	0.866022	NEUTRAL	CORO6	1.19212	2.50073	1.06882	0.99965	UP
hsa-miR-3615	79.221	71.5719	0.903446	-0.14649	0.879307	NEUTRAL	CORO6	1.19212	2.50073	1.06882	0.99965	UP
hsa-miR-3615	79.221	71.5719	0.903446	-0.14649	0.879307	NEUTRAL	CORO6	1.19212	2.50073	1.06882	0.99965	UP
hsa-miR-484	1291.3	1132.78	0.877238	-0.188959	0.800823	NEUTRAL	CORO6	1.19212	2.50073	1.06882	0.99965	UP
hsa-miR-484	1291.3	1132.78	0.877238	-0.188959	0.800823	NEUTRAL	CORO6	1.19212	2.50073	1.06882	0.99965	UP
hsa-miR-484	1291.3	1132.78	0.877238	-0.188959	0.800823	NEUTRAL	CORO6	1.19212	2.50073	1.06882	0.99965	UP
hsa-miR-484	1291.3	1132.78	0.877238	-0.188959	0.800823	NEUTRAL	CORO6	1.19212	2.50073	1.06882	0.99965	UP
hsa-miR-484	1291.3	1132.78	0.877238	-0.188959	0.800823	NEUTRAL	CORO6	1.19212	2.50073	1.06882	0.99965	UP
hsa-miR-484	1291.3	1132.78	0.877238	-0.188959	0.800823	NEUTRAL	CORO6	1.19212	2.50073	1.06882	0.99965	UP
hsa-miR-484	1291.3	1132.78	0.877238	-0.188959	0.800823	NEUTRAL	CORO6	1.19212	2.50073	1.06882	0.99965	UP
hsa-miR-484	1291.3	1132.78	0.877238	-0.188959	0.800823	NEUTRAL	CORO6	1.19212	2.50073	1.06882	0.99965	UP
hsa-miR-339-3p	837.479	635.311	0.758599	-0.39859	0.601644	NEUTRAL	CORO6	1.19212	2.50073	1.06882	0.99965	UP
hsa-miR-339-3p	837.479	635.311	0.758599	-0.39859	0.601644	NEUTRAL	CORO6	1.19212	2.50073	1.06882	0.99965	UP
hsa-miR-671-5p	56.5864	116.636	2.0612	1.04348	0.222883	UP	PVRIG,STAG3	1.03408	2.15043	1.05627	0.99965	UP
hsa-miR-671-5p	56.5864	116.636	2.0612	1.04348	0.222883	UP	PVRIG,STAG3	1.03408	2.15043	1.05627	0.99965	UP
hsa-miR-671-5p	56.5864	116.636	2.0612	1.04348	0.222883	UP	PVRIG,STAG3	1.03408	2.15043	1.05627	0.99965	UP
hsa-miR-671-5p	56.5864	116.636	2.0612	1.04348	0.222883	UP	PVRIG,STAG3	1.03408	2.15043	1.05627	0.99965	UP
hsa-miR-671-5p	56.5864	116.636	2.0612	1.04348	0.222883	UP	PVRIG,STAG3	1.03408	2.15043	1.05627	0.99965	UP
hsa-miR-671-5p	56.5864	116.636	2.0612	1.04348	0.222883	UP	PVRIG,STAG3	1.03408	2.15043	1.05627	0.99965	UP
hsa-miR-671-5p	56.5864	116.636	2.0612	1.04348	0.222883	UP	PVRIG,STAG3	1.03408	2.15043	1.05627	0.99965	UP
hsa-miR-210-5p	332.728	350.791	1.05429	0.0762664	0.926502	NEUTRAL	PVRIG,STAG3	1.03408	2.15043	1.05627	0.99965	UP
hsa-miR-210-5p	332.728	350.791	1.05429	0.0762664	0.926502	NEUTRAL	PVRIG,STAG3	1.03408	2.15043	1.05627	0.99965	UP
hsa-miR-210-5p	332.728	350.791	1.05429	0.0762664	0.926502	NEUTRAL	PVRIG,STAG3	1.03408	2.15043	1.05627	0.99965	UP
hsa-miR-210-5p	332.728	350.791	1.05429	0.0762664	0.926502	NEUTRAL	PVRIG,STAG3	1.03408	2.15043	1.05627	0.99965	UP
hsa-miR-210-5p	332.728	350.791	1.05429	0.0762664	0.926502	NEUTRAL	PVRIG,STAG3	1.03408	2.15043	1.05627	0.99965	UP
hsa-miR-210-5p	332.728	350.791	1.05429	0.0762664	0.926502	NEUTRAL	PVRIG,STAG3	1.03408	2.15043	1.05627	0.99965	UP
hsa-miR-210-5p	332.728	350.791	1.05429	0.0762664	0.926502	NEUTRAL	PVRIG,STAG3	1.03408	2.15043	1.05627	0.99965	UP
hsa-miR-210-5p	332.728	350.791	1.05429	0.0762664	0.926502	NEUTRAL	PVRIG,STAG3	1.03408	2.15043	1.05627	0.99965	UP
hsa-miR-210-5p	332.728	350.791	1.05429	0.0762664	0.926502	NEUTRAL	PVRIG,STAG3	1.03408	2.15043	1.05627	0.99965	UP
hsa-miR-24-3p	1576.5	1563.98	0.992059	-0.0115024	0.988146	NEUTRAL	PVRIG,STAG3	1.03408	2.15043	1.05627	0.99965	UP
hsa-miR-24-3p	1576.5	1563.98	0.992059	-0.0115024	0.988146	NEUTRAL	PVRIG,STAG3	1.03408	2.15043	1.05627	0.99965	UP
hsa-miR-24-3p	1576.5	1563.98	0.992059	-0.0115024	0.988146	NEUTRAL	PVRIG,STAG3	1.03408	2.15043	1.05627	0.99965	UP
hsa-miR-24-3p	1576.5	1563.98	0.992059	-0.0115024	0.988146	NEUTRAL	PVRIG,STAG3	1.03408	2.15043	1.05627	0.99965	UP
hsa-miR-24-3p	1576.5	1563.98	0.992059	-0.0115024	0.988146	NEUTRAL	PVRIG,STAG3	1.03408	2.15043	1.05627	0.99965	UP
hsa-miR-24-3p	1576.5	1563.98	0.992059	-0.0115024	0.988146	NEUTRAL	PVRIG,STAG3	1.03408	2.15043	1.05627	0.99965	UP
hsa-miR-24-3p	1576.5	1563.98	0.992059	-0.0115024	0.988146	NEUTRAL	PVRIG,STAG3	1.03408	2.15043	1.05627	0.99965	UP
hsa-miR-324-3p	18.1077	17.6721	0.975945	-0.0351284	1	NEUTRAL	PVRIG,STAG3	1.03408	2.15043	1.05627	0.99965	UP
hsa-miR-324-3p	18.1077	17.6721	0.975945	-0.0351284	1	NEUTRAL	PVRIG,STAG3	1.03408	2.15043	1.05627	0.99965	UP
hsa-miR-324-3p	18.1077	17.6721	0.975945	-0.0351284	1	NEUTRAL	PVRIG,STAG3	1.03408	2.15043	1.05627	0.99965	UP
hsa-miR-324-3p	18.1077	17.6721	0.975945	-0.0351284	1	NEUTRAL	PVRIG,STAG3	1.03408	2.15043	1.05627	0.99965	UP
hsa-miR-324-3p	18.1077	17.6721	0.975945	-0.0351284	1	NEUTRAL	PVRIG,STAG3	1.03408	2.15043	1.05627	0.99965	UP
hsa-miR-324-3p	18.1077	17.6721	0.975945	-0.0351284	1	NEUTRAL	PVRIG,STAG3	1.03408	2.15043	1.05627	0.99965	UP
hsa-miR-324-3p	18.1077	17.6721	0.975945	-0.0351284	1	NEUTRAL	PVRIG,STAG3	1.03408	2.15043	1.05627	0.99965	UP
hsa-miR-370-5p	12.449	8.83604	0.709778	-0.49456	0.736219	NEUTRAL	PVRIG,STAG3	1.03408	2.15043	1.05627	0.99965	UP
hsa-miR-370-5p	12.449	8.83604	0.709778	-0.49456	0.736219	NEUTRAL	PVRIG,STAG3	1.03408	2.15043	1.05627	0.99965	UP
hsa-miR-370-5p	12.449	8.83604	0.709778	-0.49456	0.736219	NEUTRAL	PVRIG,STAG3	1.03408	2.15043	1.05627	0.99965	UP
hsa-miR-370-5p	12.449	8.83604	0.709778	-0.49456	0.736219	NEUTRAL	PVRIG,STAG3	1.03408	2.15043	1.05627	0.99965	UP
hsa-miR-370-5p	12.449	8.83604	0.709778	-0.49456	0.736219	NEUTRAL	PVRIG,STAG3	1.03408	2.15043	1.05627	0.99965	UP
hsa-miR-370-5p	12.449	8.83604	0.709778	-0.49456	0.736219	NEUTRAL	PVRIG,STAG3	1.03408	2.15043	1.05627	0.99965	UP
hsa-miR-370-5p	12.449	8.83604	0.709778	-0.49456	0.736219	NEUTRAL	PVRIG,STAG3	1.03408	2.15043	1.05627	0.99965	UP
hsa-miR-4466	12.449	7.06883	0.567822	-0.816488	0.536058	NEUTRAL	PVRIG,STAG3	1.03408	2.15043	1.05627	0.99965	UP
hsa-miR-4466	12.449	7.06883	0.567822	-0.816488	0.536058	NEUTRAL	PVRIG,STAG3	1.03408	2.15043	1.05627	0.99965	UP
hsa-miR-26a-5p	85407	93176	1.09096	0.125604	0.81459	NEUTRAL	LDHD	0.218874	0.451818	1.04564	0.99965	UP
hsa-miR-26a-5p	85407	93176	1.09096	0.125604	0.81459	NEUTRAL	LDHD	0.218874	0.451818	1.04564	0.99965	UP
hsa-miR-26a-5p	85407	93176	1.09096	0.125604	0.81459	NEUTRAL	LDHD	0.218874	0.451818	1.04564	0.99965	UP
hsa-miR-26a-5p	85407	93176	1.09096	0.125604	0.81459	NEUTRAL	LDHD	0.218874	0.451818	1.04564	0.99965	UP
hsa-miR-330-5p	63.3768	63.6195	1.00383	0.00551359	1	NEUTRAL	LDHD	0.218874	0.451818	1.04564	0.99965	UP
hsa-miR-330-5p	63.3768	63.6195	1.00383	0.00551359	1	NEUTRAL	LDHD	0.218874	0.451818	1.04564	0.99965	UP
hsa-miR-214-3p	1156.63	1241.46	1.07335	0.102118	0.892839	NEUTRAL	ZNF582	0.797942	1.64175	1.04088	0.99965	UP
hsa-miR-5787	12.449	3068.76	246.506	7.94548	1.13133e-14	UP	GCK	0.268397	0.551958	1.04019	0.99965	UP
hsa-miR-5787	12.449	3068.76	246.506	7.94548	1.13133e-14	UP	GCK	0.268397	0.551958	1.04019	0.99965	UP
hsa-miR-5787	12.449	3068.76	246.506	7.94548	1.13133e-14	UP	GCK	0.268397	0.551958	1.04019	0.99965	UP
hsa-miR-5787	12.449	3068.76	246.506	7.94548	1.13133e-14	UP	GCK	0.268397	0.551958	1.04019	0.99965	UP
hsa-miR-5787	12.449	3068.76	246.506	7.94548	1.13133e-14	UP	GCK	0.268397	0.551958	1.04019	0.99965	UP
hsa-miR-5787	12.449	3068.76	246.506	7.94548	1.13133e-14	UP	GCK	0.268397	0.551958	1.04019	0.99965	UP
hsa-miR-1296-5p	246.717	214.716	0.870292	-0.200428	0.803997	NEUTRAL	GCK	0.268397	0.551958	1.04019	0.99965	UP
hsa-miR-1296-5p	246.717	214.716	0.870292	-0.200428	0.803997	NEUTRAL	GCK	0.268397	0.551958	1.04019	0.99965	UP
hsa-miR-1296-5p	246.717	214.716	0.870292	-0.200428	0.803997	NEUTRAL	GCK	0.268397	0.551958	1.04019	0.99965	UP
hsa-miR-1296-5p	246.717	214.716	0.870292	-0.200428	0.803997	NEUTRAL	GCK	0.268397	0.551958	1.04019	0.99965	UP
hsa-miR-1296-5p	246.717	214.716	0.870292	-0.200428	0.803997	NEUTRAL	GCK	0.268397	0.551958	1.04019	0.99965	UP
hsa-miR-1296-5p	246.717	214.716	0.870292	-0.200428	0.803997	NEUTRAL	GCK	0.268397	0.551958	1.04019	0.99965	UP
hsa-miR-2277-5p	35.0836	47.7146	1.36003	0.443635	0.654588	NEUTRAL	UACA	24.0204	49.0802	1.03088	0.99965	UP
hsa-miR-659-5p	15.8442	18.5557	1.17113	0.227906	0.890982	NEUTRAL	ACTA2	120.146	245.3	1.02976	0.52292	UP
hsa-miR-659-5p	15.8442	18.5557	1.17113	0.227906	0.890982	NEUTRAL	ACTA2	120.146	245.3	1.02976	0.52292	UP
hsa-miR-659-5p	15.8442	18.5557	1.17113	0.227906	0.890982	NEUTRAL	ACTA2	120.146	245.3	1.02976	0.52292	UP
hsa-miR-766-3p	12.449	16.7885	1.34858	0.431439	0.754984	NEUTRAL	PLAC8L1	0.555157	1.13089	1.02649	0.99965	UP
hsa-miR-766-3p	12.449	16.7885	1.34858	0.431439	0.754984	NEUTRAL	PLAC8L1	0.555157	1.13089	1.02649	0.99965	UP
hsa-miR-214-3p	1156.63	1241.46	1.07335	0.102118	0.892839	NEUTRAL	PLAC8L1	0.555157	1.13089	1.02649	0.99965	UP
hsa-miR-214-3p	1156.63	1241.46	1.07335	0.102118	0.892839	NEUTRAL	PLAC8L1	0.555157	1.13089	1.02649	0.99965	UP
hsa-miR-5787	12.449	3068.76	246.506	7.94548	1.13133e-14	UP	EFHD1	0.461346	0.932248	1.01486	0.99965	UP
hsa-miR-5787	12.449	3068.76	246.506	7.94548	1.13133e-14	UP	EFHD1	0.461346	0.932248	1.01486	0.99965	UP
hsa-miR-5787	12.449	3068.76	246.506	7.94548	1.13133e-14	UP	EFHD1	0.461346	0.932248	1.01486	0.99965	UP
hsa-miR-5787	12.449	3068.76	246.506	7.94548	1.13133e-14	UP	EFHD1	0.461346	0.932248	1.01486	0.99965	UP
hsa-miR-5787	12.449	3068.76	246.506	7.94548	1.13133e-14	UP	EFHD1	0.461346	0.932248	1.01486	0.99965	UP
hsa-miR-5787	12.449	3068.76	246.506	7.94548	1.13133e-14	UP	EFHD1	0.461346	0.932248	1.01486	0.99965	UP
hsa-miR-92b-5p	2.26346	11.4869	5.07491	2.34338	0.103638	UP	EFHD1	0.461346	0.932248	1.01486	0.99965	UP
hsa-miR-4326	21.5028	23.8573	1.1095	0.149903	0.932342	NEUTRAL	EFHD1	0.461346	0.932248	1.01486	0.99965	UP
hsa-miR-3176	13.5807	32.6933	2.40733	1.26743	0.238661	UP	RASSF7	3.04611	6.12666	1.00813	0.99965	UP
hsa-miR-1268b	70.1672	68.9211	0.982241	-0.0258506	0.995133	NEUTRAL	RASSF7	3.04611	6.12666	1.00813	0.99965	UP
hsa-miR-1268b	70.1672	68.9211	0.982241	-0.0258506	0.995133	NEUTRAL	RASSF7	3.04611	6.12666	1.00813	0.99965	UP
hsa-miR-1268b	70.1672	68.9211	0.982241	-0.0258506	0.995133	NEUTRAL	RASSF7	3.04611	6.12666	1.00813	0.99965	UP
hsa-miR-1268b	70.1672	68.9211	0.982241	-0.0258506	0.995133	NEUTRAL	RASSF7	3.04611	6.12666	1.00813	0.99965	UP
hsa-miR-1268b	70.1672	68.9211	0.982241	-0.0258506	0.995133	NEUTRAL	RASSF7	3.04611	6.12666	1.00813	0.99965	UP
hsa-miR-1268b	70.1672	68.9211	0.982241	-0.0258506	0.995133	NEUTRAL	RASSF7	3.04611	6.12666	1.00813	0.99965	UP
hsa-miR-1268b	70.1672	68.9211	0.982241	-0.0258506	0.995133	NEUTRAL	RASSF7	3.04611	6.12666	1.00813	0.99965	UP
hsa-miR-1268b	70.1672	68.9211	0.982241	-0.0258506	0.995133	NEUTRAL	RASSF7	3.04611	6.12666	1.00813	0.99965	UP
hsa-miR-1268b	70.1672	68.9211	0.982241	-0.0258506	0.995133	NEUTRAL	RASSF7	3.04611	6.12666	1.00813	0.99965	UP
hsa-miR-296-5p	15.8442	13.2541	0.836524	-0.257521	0.879313	NEUTRAL	RASSF7	3.04611	6.12666	1.00813	0.99965	UP
hsa-miR-4532	43237.7	8708.8	0.201417	-2.31174	0.000347847	DOWN	RASSF7	3.04611	6.12666	1.00813	0.99965	UP
hsa-miR-23a-5p	107.514	106.916	0.994436	-0.00804886	1	NEUTRAL	SLC6A16	0.383017	0.769242	1.00603	0.99965	UP
hsa-miR-665	33.9519	32.6933	0.962932	-0.0544937	0.990546	NEUTRAL	SLC6A16	0.383017	0.769242	1.00603	0.99965	UP
hsa-miR-665	33.9519	32.6933	0.962932	-0.0544937	0.990546	NEUTRAL	SLC6A16	0.383017	0.769242	1.00603	0.99965	UP
hsa-miR-4516	14.7125	26.5081	1.80174	0.849394	0.44668	NEUTRAL	ESPN	0.438479	0.871796	0.991482	0.99965	NEUTRAL
hsa-miR-4516	14.7125	26.5081	1.80174	0.849394	0.44668	NEUTRAL	ESPN	0.438479	0.871796	0.991482	0.99965	NEUTRAL
hsa-miR-4516	14.7125	26.5081	1.80174	0.849394	0.44668	NEUTRAL	ESPN	0.438479	0.871796	0.991482	0.99965	NEUTRAL
hsa-miR-4516	14.7125	26.5081	1.80174	0.849394	0.44668	NEUTRAL	ESPN	0.438479	0.871796	0.991482	0.99965	NEUTRAL
hsa-miR-25-5p	19.2394	30.0425	1.56151	0.642944	0.555495	NEUTRAL	ESPN	0.438479	0.871796	0.991482	0.99965	NEUTRAL
hsa-miR-3180-3p	10.1856	13.2541	1.30126	0.379909	0.813853	NEUTRAL	ESPN	0.438479	0.871796	0.991482	0.99965	NEUTRAL
hsa-miR-3180-3p	10.1856	13.2541	1.30126	0.379909	0.813853	NEUTRAL	ESPN	0.438479	0.871796	0.991482	0.99965	NEUTRAL
hsa-miR-3180-3p	10.1856	13.2541	1.30126	0.379909	0.813853	NEUTRAL	ESPN	0.438479	0.871796	0.991482	0.99965	NEUTRAL
hsa-miR-3180-3p	10.1856	13.2541	1.30126	0.379909	0.813853	NEUTRAL	ESPN	0.438479	0.871796	0.991482	0.99965	NEUTRAL
hsa-miR-214-3p	1156.63	1241.46	1.07335	0.102118	0.892839	NEUTRAL	ESPN	0.438479	0.871796	0.991482	0.99965	NEUTRAL
hsa-miR-4466	12.449	7.06883	0.567822	-0.816488	0.536058	NEUTRAL	ESPN	0.438479	0.871796	0.991482	0.99965	NEUTRAL
hsa-miR-3960	12.449	0.883604	0.0709778	-3.81649	0.016522	DOWN	ESPN	0.438479	0.871796	0.991482	0.99965	NEUTRAL
hsa-miR-3960	12.449	0.883604	0.0709778	-3.81649	0.016522	DOWN	ESPN	0.438479	0.871796	0.991482	0.99965	NEUTRAL
hsa-miR-3960	12.449	0.883604	0.0709778	-3.81649	0.016522	DOWN	ESPN	0.438479	0.871796	0.991482	0.99965	NEUTRAL
hsa-miR-3960	12.449	0.883604	0.0709778	-3.81649	0.016522	DOWN	ESPN	0.438479	0.871796	0.991482	0.99965	NEUTRAL
hsa-miR-151a-3p	5943.84	7499.15	1.26167	0.335331	0.623506	NEUTRAL	THBS4	0.30318	0.602101	0.989831	0.99965	NEUTRAL
hsa-miR-1268b	70.1672	68.9211	0.982241	-0.0258506	0.995133	NEUTRAL	THBS4	0.30318	0.602101	0.989831	0.99965	NEUTRAL
hsa-miR-1268b	70.1672	68.9211	0.982241	-0.0258506	0.995133	NEUTRAL	THBS4	0.30318	0.602101	0.989831	0.99965	NEUTRAL
hsa-miR-331-3p	379.129	285.404	0.752789	-0.409683	0.601587	NEUTRAL	THBS4	0.30318	0.602101	0.989831	0.99965	NEUTRAL
hsa-miR-331-3p	379.129	285.404	0.752789	-0.409683	0.601587	NEUTRAL	THBS4	0.30318	0.602101	0.989831	0.99965	NEUTRAL
hsa-miR-331-3p	379.129	285.404	0.752789	-0.409683	0.601587	NEUTRAL	THBS4	0.30318	0.602101	0.989831	0.99965	NEUTRAL
hsa-miR-127-5p	275.01	384.368	1.39765	0.483003	0.538909	NEUTRAL	CCDC144A,RP11-219A15.1	5.74677	11.4098	0.989443	0.99965	NEUTRAL
hsa-miR-210-5p	332.728	350.791	1.05429	0.0762664	0.926502	NEUTRAL	CCDC144A,RP11-219A15.1	5.74677	11.4098	0.989443	0.99965	NEUTRAL
hsa-miR-330-5p	63.3768	63.6195	1.00383	0.00551359	1	NEUTRAL	CCDC144A,RP11-219A15.1	5.74677	11.4098	0.989443	0.99965	NEUTRAL
hsa-miR-1343-3p	6.79037	11.4869	1.69164	0.758421	0.589942	NEUTRAL	AMZ1	0.252253	0.500262	0.987812	0.99965	NEUTRAL
hsa-miR-1343-3p	6.79037	11.4869	1.69164	0.758421	0.589942	NEUTRAL	AMZ1	0.252253	0.500262	0.987812	0.99965	NEUTRAL
hsa-miR-214-3p	1156.63	1241.46	1.07335	0.102118	0.892839	NEUTRAL	AMZ1	0.252253	0.500262	0.987812	0.99965	NEUTRAL
hsa-miR-128-1-5p	19.2394	20.3229	1.05632	0.0790426	0.997233	NEUTRAL	AMZ1	0.252253	0.500262	0.987812	0.99965	NEUTRAL
hsa-miR-128-1-5p	19.2394	20.3229	1.05632	0.0790426	0.997233	NEUTRAL	AMZ1	0.252253	0.500262	0.987812	0.99965	NEUTRAL
hsa-miR-210-5p	332.728	350.791	1.05429	0.0762664	0.926502	NEUTRAL	AMZ1	0.252253	0.500262	0.987812	0.99965	NEUTRAL
hsa-miR-370-3p	169.759	161.7	0.952522	-0.0701753	0.937972	NEUTRAL	AMZ1	0.252253	0.500262	0.987812	0.99965	NEUTRAL
hsa-miR-370-3p	169.759	161.7	0.952522	-0.0701753	0.937972	NEUTRAL	AMZ1	0.252253	0.500262	0.987812	0.99965	NEUTRAL
hsa-miR-370-3p	169.759	161.7	0.952522	-0.0701753	0.937972	NEUTRAL	AMZ1	0.252253	0.500262	0.987812	0.99965	NEUTRAL
hsa-miR-25-5p	19.2394	30.0425	1.56151	0.642944	0.555495	NEUTRAL	CCDC24	1.28619	2.54098	0.982288	0.99965	NEUTRAL
hsa-miR-25-5p	19.2394	30.0425	1.56151	0.642944	0.555495	NEUTRAL	CCDC24	1.28619	2.54098	0.982288	0.99965	NEUTRAL
hsa-miR-25-5p	19.2394	30.0425	1.56151	0.642944	0.555495	NEUTRAL	CCDC24	1.28619	2.54098	0.982288	0.99965	NEUTRAL
hsa-miR-25-5p	19.2394	30.0425	1.56151	0.642944	0.555495	NEUTRAL	CCDC24	1.28619	2.54098	0.982288	0.99965	NEUTRAL
hsa-miR-25-5p	19.2394	30.0425	1.56151	0.642944	0.555495	NEUTRAL	CCDC24	1.28619	2.54098	0.982288	0.99965	NEUTRAL
hsa-miR-25-5p	19.2394	30.0425	1.56151	0.642944	0.555495	NEUTRAL	CCDC24	1.28619	2.54098	0.982288	0.99965	NEUTRAL
hsa-miR-3180-3p	10.1856	13.2541	1.30126	0.379909	0.813853	NEUTRAL	CCDC24	1.28619	2.54098	0.982288	0.99965	NEUTRAL
hsa-miR-3180-3p	10.1856	13.2541	1.30126	0.379909	0.813853	NEUTRAL	CCDC24	1.28619	2.54098	0.982288	0.99965	NEUTRAL
hsa-miR-3180-3p	10.1856	13.2541	1.30126	0.379909	0.813853	NEUTRAL	CCDC24	1.28619	2.54098	0.982288	0.99965	NEUTRAL
hsa-miR-3180-3p	10.1856	13.2541	1.30126	0.379909	0.813853	NEUTRAL	CCDC24	1.28619	2.54098	0.982288	0.99965	NEUTRAL
hsa-miR-3180-3p	10.1856	13.2541	1.30126	0.379909	0.813853	NEUTRAL	CCDC24	1.28619	2.54098	0.982288	0.99965	NEUTRAL
hsa-miR-484	1291.3	1132.78	0.877238	-0.188959	0.800823	NEUTRAL	CCDC24	1.28619	2.54098	0.982288	0.99965	NEUTRAL
hsa-miR-484	1291.3	1132.78	0.877238	-0.188959	0.800823	NEUTRAL	CCDC24	1.28619	2.54098	0.982288	0.99965	NEUTRAL
hsa-miR-484	1291.3	1132.78	0.877238	-0.188959	0.800823	NEUTRAL	CCDC24	1.28619	2.54098	0.982288	0.99965	NEUTRAL
hsa-miR-484	1291.3	1132.78	0.877238	-0.188959	0.800823	NEUTRAL	CCDC24	1.28619	2.54098	0.982288	0.99965	NEUTRAL
hsa-miR-484	1291.3	1132.78	0.877238	-0.188959	0.800823	NEUTRAL	CCDC24	1.28619	2.54098	0.982288	0.99965	NEUTRAL
hsa-miR-484	1291.3	1132.78	0.877238	-0.188959	0.800823	NEUTRAL	CCDC24	1.28619	2.54098	0.982288	0.99965	NEUTRAL
hsa-miR-484	1291.3	1132.78	0.877238	-0.188959	0.800823	NEUTRAL	CCDC24	1.28619	2.54098	0.982288	0.99965	NEUTRAL
hsa-miR-484	1291.3	1132.78	0.877238	-0.188959	0.800823	NEUTRAL	CCDC24	1.28619	2.54098	0.982288	0.99965	NEUTRAL
hsa-miR-484	1291.3	1132.78	0.877238	-0.188959	0.800823	NEUTRAL	CCDC24	1.28619	2.54098	0.982288	0.99965	NEUTRAL
hsa-miR-331-3p	379.129	285.404	0.752789	-0.409683	0.601587	NEUTRAL	CCDC24	1.28619	2.54098	0.982288	0.99965	NEUTRAL
hsa-miR-3176	13.5807	32.6933	2.40733	1.26743	0.238661	UP	ZNF324B	0.789869	1.55804	0.980044	0.99965	NEUTRAL
hsa-miR-3176	13.5807	32.6933	2.40733	1.26743	0.238661	UP	ZNF324B	0.789869	1.55804	0.980044	0.99965	NEUTRAL
hsa-miR-3176	13.5807	32.6933	2.40733	1.26743	0.238661	UP	AKR1E2	0.868759	1.71264	0.979192	0.99965	NEUTRAL
hsa-miR-3176	13.5807	32.6933	2.40733	1.26743	0.238661	UP	AKR1E2	0.868759	1.71264	0.979192	0.99965	NEUTRAL
hsa-miR-3176	13.5807	32.6933	2.40733	1.26743	0.238661	UP	AKR1E2	0.868759	1.71264	0.979192	0.99965	NEUTRAL
hsa-miR-28-5p	890.671	1619.65	1.81846	0.862715	0.250733	NEUTRAL	AKR1E2	0.868759	1.71264	0.979192	0.99965	NEUTRAL
hsa-miR-940	5.65864	13.2541	2.34227	1.22791	0.344393	UP	PTK2B	1.44794	2.84557	0.974716	0.99965	NEUTRAL
hsa-miR-940	5.65864	13.2541	2.34227	1.22791	0.344393	UP	PTK2B	1.44794	2.84557	0.974716	0.99965	NEUTRAL
hsa-miR-940	5.65864	13.2541	2.34227	1.22791	0.344393	UP	PTK2B	1.44794	2.84557	0.974716	0.99965	NEUTRAL
hsa-miR-940	5.65864	13.2541	2.34227	1.22791	0.344393	UP	PTK2B	1.44794	2.84557	0.974716	0.99965	NEUTRAL
hsa-miR-23a-5p	107.514	106.916	0.994436	-0.00804886	1	NEUTRAL	PTK2B	1.44794	2.84557	0.974716	0.99965	NEUTRAL
hsa-miR-23a-5p	107.514	106.916	0.994436	-0.00804886	1	NEUTRAL	PTK2B	1.44794	2.84557	0.974716	0.99965	NEUTRAL
hsa-miR-23a-5p	107.514	106.916	0.994436	-0.00804886	1	NEUTRAL	PTK2B	1.44794	2.84557	0.974716	0.99965	NEUTRAL
hsa-miR-23a-5p	107.514	106.916	0.994436	-0.00804886	1	NEUTRAL	PTK2B	1.44794	2.84557	0.974716	0.99965	NEUTRAL
hsa-miR-23a-5p	107.514	106.916	0.994436	-0.00804886	1	NEUTRAL	PTK2B	1.44794	2.84557	0.974716	0.99965	NEUTRAL
hsa-miR-23a-5p	107.514	106.916	0.994436	-0.00804886	1	NEUTRAL	PARK2	0.347023	0.681641	0.973979	0.99965	NEUTRAL
hsa-miR-23a-5p	107.514	106.916	0.994436	-0.00804886	1	NEUTRAL	PARK2	0.347023	0.681641	0.973979	0.99965	NEUTRAL
hsa-miR-23a-5p	107.514	106.916	0.994436	-0.00804886	1	NEUTRAL	PARK2	0.347023	0.681641	0.973979	0.99965	NEUTRAL
hsa-miR-30b-3p	18.1077	14.1377	0.780756	-0.357056	0.795423	NEUTRAL	PARK2	0.347023	0.681641	0.973979	0.99965	NEUTRAL
hsa-miR-330-5p	63.3768	63.6195	1.00383	0.00551359	1	NEUTRAL	LRP5L	1.6046	3.15122	0.973696	0.99965	NEUTRAL
hsa-miR-330-5p	63.3768	63.6195	1.00383	0.00551359	1	NEUTRAL	LRP5L	1.6046	3.15122	0.973696	0.99965	NEUTRAL
hsa-miR-324-3p	18.1077	17.6721	0.975945	-0.0351284	1	NEUTRAL	LRP5L	1.6046	3.15122	0.973696	0.99965	NEUTRAL
hsa-miR-324-3p	18.1077	17.6721	0.975945	-0.0351284	1	NEUTRAL	LRP5L	1.6046	3.15122	0.973696	0.99965	NEUTRAL
hsa-miR-127-3p	9436.35	7902.07	0.837407	-0.255999	0.702428	NEUTRAL	LRP5L	1.6046	3.15122	0.973696	0.99965	NEUTRAL
hsa-miR-127-3p	9436.35	7902.07	0.837407	-0.255999	0.702428	NEUTRAL	LRP5L	1.6046	3.15122	0.973696	0.99965	NEUTRAL
hsa-miR-30b-3p	18.1077	14.1377	0.780756	-0.357056	0.795423	NEUTRAL	LRP5L	1.6046	3.15122	0.973696	0.99965	NEUTRAL
hsa-miR-30b-3p	18.1077	14.1377	0.780756	-0.357056	0.795423	NEUTRAL	LRP5L	1.6046	3.15122	0.973696	0.99965	NEUTRAL
hsa-miR-1285-3p	115.436	132.541	1.14817	0.199337	0.816678	NEUTRAL	DAPK2	0.776999	1.52548	0.973283	0.99965	NEUTRAL
hsa-miR-3200-3p	14.7125	13.2541	0.900872	-0.150606	0.963914	NEUTRAL	DAPK2	0.776999	1.52548	0.973283	0.99965	NEUTRAL
hsa-miR-3200-3p	14.7125	13.2541	0.900872	-0.150606	0.963914	NEUTRAL	DAPK2	0.776999	1.52548	0.973283	0.99965	NEUTRAL
hsa-miR-1301-3p	18.1077	25.6245	1.41512	0.500925	0.665757	NEUTRAL	PDE11A	0.66986	1.31459	0.972683	0.99965	NEUTRAL
hsa-miR-1301-3p	18.1077	25.6245	1.41512	0.500925	0.665757	NEUTRAL	PDE11A	0.66986	1.31459	0.972683	0.99965	NEUTRAL
hsa-miR-1301-3p	18.1077	25.6245	1.41512	0.500925	0.665757	NEUTRAL	PDE11A	0.66986	1.31459	0.972683	0.99965	NEUTRAL
hsa-miR-1301-3p	18.1077	25.6245	1.41512	0.500925	0.665757	NEUTRAL	PDE11A	0.66986	1.31459	0.972683	0.99965	NEUTRAL
hsa-miR-1301-3p	18.1077	25.6245	1.41512	0.500925	0.665757	NEUTRAL	PDE11A	0.66986	1.31459	0.972683	0.99965	NEUTRAL
hsa-miR-1285-3p	115.436	132.541	1.14817	0.199337	0.816678	NEUTRAL	PDE11A	0.66986	1.31459	0.972683	0.99965	NEUTRAL
hsa-miR-210-5p	332.728	350.791	1.05429	0.0762664	0.926502	NEUTRAL	PDE11A	0.66986	1.31459	0.972683	0.99965	NEUTRAL
hsa-miR-23a-5p	107.514	106.916	0.994436	-0.00804886	1	NEUTRAL	PDE11A	0.66986	1.31459	0.972683	0.99965	NEUTRAL
hsa-miR-5699-3p	12.449	3.53442	0.283911	-1.81649	0.159969	DOWN	PDE11A	0.66986	1.31459	0.972683	0.99965	NEUTRAL
hsa-miR-365b-5p	18.1077	22.0901	1.21993	0.2868	0.833175	NEUTRAL	TBC1D30	0.209354	0.409748	0.96879	0.99965	NEUTRAL
hsa-miR-365b-5p	18.1077	22.0901	1.21993	0.2868	0.833175	NEUTRAL	TBC1D30	0.209354	0.409748	0.96879	0.99965	NEUTRAL
hsa-miR-665	33.9519	32.6933	0.962932	-0.0544937	0.990546	NEUTRAL	TBC1D30	0.209354	0.409748	0.96879	0.99965	NEUTRAL
hsa-miR-324-3p	18.1077	17.6721	0.975945	-0.0351284	1	NEUTRAL	TSPAN1	0.432545	0.840884	0.959057	0.99965	NEUTRAL
hsa-miR-324-3p	18.1077	17.6721	0.975945	-0.0351284	1	NEUTRAL	TSPAN1	0.432545	0.840884	0.959057	0.99965	NEUTRAL
hsa-miR-324-3p	18.1077	17.6721	0.975945	-0.0351284	1	NEUTRAL	TSPAN1	0.432545	0.840884	0.959057	0.99965	NEUTRAL
hsa-miR-324-3p	18.1077	17.6721	0.975945	-0.0351284	1	NEUTRAL	TSPAN1	0.432545	0.840884	0.959057	0.99965	NEUTRAL
hsa-miR-324-3p	18.1077	17.6721	0.975945	-0.0351284	1	NEUTRAL	TSPAN1	0.432545	0.840884	0.959057	0.99965	NEUTRAL
hsa-miR-324-3p	18.1077	17.6721	0.975945	-0.0351284	1	NEUTRAL	TSPAN1	0.432545	0.840884	0.959057	0.99965	NEUTRAL
hsa-miR-324-3p	18.1077	17.6721	0.975945	-0.0351284	1	NEUTRAL	TSPAN1	0.432545	0.840884	0.959057	0.99965	NEUTRAL
hsa-miR-324-3p	18.1077	17.6721	0.975945	-0.0351284	1	NEUTRAL	TSPAN1	0.432545	0.840884	0.959057	0.99965	NEUTRAL
hsa-miR-138-5p	10404	7145.71	0.686824	-0.541988	0.419407	NEUTRAL	TSPAN1	0.432545	0.840884	0.959057	0.99965	NEUTRAL
hsa-miR-296-5p	15.8442	13.2541	0.836524	-0.257521	0.879313	NEUTRAL	SLC12A8	4.03203	7.8325	0.957968	0.99965	NEUTRAL
hsa-miR-3180-3p	10.1856	13.2541	1.30126	0.379909	0.813853	NEUTRAL	WDR27	4.06931	7.88316	0.953991	0.99965	NEUTRAL
hsa-miR-3180-3p	10.1856	13.2541	1.30126	0.379909	0.813853	NEUTRAL	WDR27	4.06931	7.88316	0.953991	0.99965	NEUTRAL
hsa-miR-3180-3p	10.1856	13.2541	1.30126	0.379909	0.813853	NEUTRAL	WDR27	4.06931	7.88316	0.953991	0.99965	NEUTRAL
hsa-miR-3180-3p	10.1856	13.2541	1.30126	0.379909	0.813853	NEUTRAL	WDR27	4.06931	7.88316	0.953991	0.99965	NEUTRAL
hsa-miR-3180-3p	10.1856	13.2541	1.30126	0.379909	0.813853	NEUTRAL	WDR27	4.06931	7.88316	0.953991	0.99965	NEUTRAL
hsa-miR-7706	53.1913	61.8523	1.16283	0.217638	0.825481	NEUTRAL	ISYNA1	4.65139	8.9616	0.946095	0.99965	NEUTRAL
hsa-miR-7706	53.1913	61.8523	1.16283	0.217638	0.825481	NEUTRAL	ISYNA1	4.65139	8.9616	0.946095	0.99965	NEUTRAL
hsa-miR-7706	53.1913	61.8523	1.16283	0.217638	0.825481	NEUTRAL	ISYNA1	4.65139	8.9616	0.946095	0.99965	NEUTRAL
hsa-miR-7706	53.1913	61.8523	1.16283	0.217638	0.825481	NEUTRAL	ISYNA1	4.65139	8.9616	0.946095	0.99965	NEUTRAL
hsa-miR-7706	53.1913	61.8523	1.16283	0.217638	0.825481	NEUTRAL	ISYNA1	4.65139	8.9616	0.946095	0.99965	NEUTRAL
hsa-miR-7706	53.1913	61.8523	1.16283	0.217638	0.825481	NEUTRAL	ISYNA1	4.65139	8.9616	0.946095	0.99965	NEUTRAL
hsa-miR-7706	53.1913	61.8523	1.16283	0.217638	0.825481	NEUTRAL	ISYNA1	4.65139	8.9616	0.946095	0.99965	NEUTRAL
hsa-miR-7706	53.1913	61.8523	1.16283	0.217638	0.825481	NEUTRAL	ISYNA1	4.65139	8.9616	0.946095	0.99965	NEUTRAL
hsa-miR-7706	53.1913	61.8523	1.16283	0.217638	0.825481	NEUTRAL	ISYNA1	4.65139	8.9616	0.946095	0.99965	NEUTRAL
hsa-miR-128-1-5p	19.2394	20.3229	1.05632	0.0790426	0.997233	NEUTRAL	ISYNA1	4.65139	8.9616	0.946095	0.99965	NEUTRAL
hsa-miR-128-1-5p	19.2394	20.3229	1.05632	0.0790426	0.997233	NEUTRAL	ISYNA1	4.65139	8.9616	0.946095	0.99965	NEUTRAL
hsa-miR-128-1-5p	19.2394	20.3229	1.05632	0.0790426	0.997233	NEUTRAL	ISYNA1	4.65139	8.9616	0.946095	0.99965	NEUTRAL
hsa-miR-128-1-5p	19.2394	20.3229	1.05632	0.0790426	0.997233	NEUTRAL	ISYNA1	4.65139	8.9616	0.946095	0.99965	NEUTRAL
hsa-miR-128-1-5p	19.2394	20.3229	1.05632	0.0790426	0.997233	NEUTRAL	ISYNA1	4.65139	8.9616	0.946095	0.99965	NEUTRAL
hsa-miR-128-1-5p	19.2394	20.3229	1.05632	0.0790426	0.997233	NEUTRAL	ISYNA1	4.65139	8.9616	0.946095	0.99965	NEUTRAL
hsa-miR-128-1-5p	19.2394	20.3229	1.05632	0.0790426	0.997233	NEUTRAL	ISYNA1	4.65139	8.9616	0.946095	0.99965	NEUTRAL
hsa-miR-128-1-5p	19.2394	20.3229	1.05632	0.0790426	0.997233	NEUTRAL	ISYNA1	4.65139	8.9616	0.946095	0.99965	NEUTRAL
hsa-miR-128-1-5p	19.2394	20.3229	1.05632	0.0790426	0.997233	NEUTRAL	ISYNA1	4.65139	8.9616	0.946095	0.99965	NEUTRAL
hsa-miR-210-5p	332.728	350.791	1.05429	0.0762664	0.926502	NEUTRAL	ISYNA1	4.65139	8.9616	0.946095	0.99965	NEUTRAL
hsa-miR-1301-3p	18.1077	25.6245	1.41512	0.500925	0.665757	NEUTRAL	FAM167B	0.340266	0.655316	0.945528	0.99965	NEUTRAL
hsa-miR-484	1291.3	1132.78	0.877238	-0.188959	0.800823	NEUTRAL	FAM167B	0.340266	0.655316	0.945528	0.99965	NEUTRAL
hsa-miR-5787	12.449	3068.76	246.506	7.94548	1.13133e-14	UP	LAMA5	1.82798	3.5148	0.943195	0.99965	NEUTRAL
hsa-miR-5787	12.449	3068.76	246.506	7.94548	1.13133e-14	UP	LAMA5	1.82798	3.5148	0.943195	0.99965	NEUTRAL
hsa-miR-185-5p	36.2153	86.5932	2.39107	1.25765	0.161727	UP	LAMA5	1.82798	3.5148	0.943195	0.99965	NEUTRAL
hsa-miR-185-5p	36.2153	86.5932	2.39107	1.25765	0.161727	UP	LAMA5	1.82798	3.5148	0.943195	0.99965	NEUTRAL
hsa-miR-671-5p	56.5864	116.636	2.0612	1.04348	0.222883	UP	LAMA5	1.82798	3.5148	0.943195	0.99965	NEUTRAL
hsa-miR-431-3p	66.772	68.9211	1.03219	0.0457027	0.97798	NEUTRAL	LAMA5	1.82798	3.5148	0.943195	0.99965	NEUTRAL
hsa-miR-24-3p	1576.5	1563.98	0.992059	-0.0115024	0.988146	NEUTRAL	LAMA5	1.82798	3.5148	0.943195	0.99965	NEUTRAL
hsa-miR-24-3p	1576.5	1563.98	0.992059	-0.0115024	0.988146	NEUTRAL	LAMA5	1.82798	3.5148	0.943195	0.99965	NEUTRAL
hsa-miR-665	33.9519	32.6933	0.962932	-0.0544937	0.990546	NEUTRAL	LAMA5	1.82798	3.5148	0.943195	0.99965	NEUTRAL
hsa-miR-665	33.9519	32.6933	0.962932	-0.0544937	0.990546	NEUTRAL	LAMA5	1.82798	3.5148	0.943195	0.99965	NEUTRAL
hsa-miR-665	33.9519	32.6933	0.962932	-0.0544937	0.990546	NEUTRAL	LAMA5	1.82798	3.5148	0.943195	0.99965	NEUTRAL
hsa-miR-370-3p	169.759	161.7	0.952522	-0.0701753	0.937972	NEUTRAL	LAMA5	1.82798	3.5148	0.943195	0.99965	NEUTRAL
hsa-miR-370-3p	169.759	161.7	0.952522	-0.0701753	0.937972	NEUTRAL	LAMA5	1.82798	3.5148	0.943195	0.99965	NEUTRAL
hsa-miR-744-5p	823.899	698.931	0.848321	-0.237317	0.756018	NEUTRAL	LAMA5	1.82798	3.5148	0.943195	0.99965	NEUTRAL
hsa-miR-125b-2-3p	108.646	75.1063	0.691294	-0.532628	0.531351	NEUTRAL	LAMA5	1.82798	3.5148	0.943195	0.99965	NEUTRAL
hsa-miR-6131	98.4604	252.711	2.56662	1.35987	0.0946556	UP	RAPGEF3	1.59908	3.05659	0.93468	0.99965	NEUTRAL
hsa-miR-6131	98.4604	252.711	2.56662	1.35987	0.0946556	UP	RAPGEF3	1.59908	3.05659	0.93468	0.99965	NEUTRAL
hsa-miR-6131	98.4604	252.711	2.56662	1.35987	0.0946556	UP	RAPGEF3	1.59908	3.05659	0.93468	0.99965	NEUTRAL
hsa-miR-6131	98.4604	252.711	2.56662	1.35987	0.0946556	UP	RAPGEF3	1.59908	3.05659	0.93468	0.99965	NEUTRAL
hsa-miR-6131	98.4604	252.711	2.56662	1.35987	0.0946556	UP	RAPGEF3	1.59908	3.05659	0.93468	0.99965	NEUTRAL
hsa-miR-6131	98.4604	252.711	2.56662	1.35987	0.0946556	UP	RAPGEF3	1.59908	3.05659	0.93468	0.99965	NEUTRAL
hsa-miR-6131	98.4604	252.711	2.56662	1.35987	0.0946556	UP	RAPGEF3	1.59908	3.05659	0.93468	0.99965	NEUTRAL
hsa-miR-6131	98.4604	252.711	2.56662	1.35987	0.0946556	UP	RAPGEF3	1.59908	3.05659	0.93468	0.99965	NEUTRAL
hsa-miR-6131	98.4604	252.711	2.56662	1.35987	0.0946556	UP	RAPGEF3	1.59908	3.05659	0.93468	0.99965	NEUTRAL
hsa-miR-6131	98.4604	252.711	2.56662	1.35987	0.0946556	UP	RAPGEF3	1.59908	3.05659	0.93468	0.99965	NEUTRAL
hsa-miR-6131	98.4604	252.711	2.56662	1.35987	0.0946556	UP	RAPGEF3	1.59908	3.05659	0.93468	0.99965	NEUTRAL
hsa-miR-6131	98.4604	252.711	2.56662	1.35987	0.0946556	UP	RAPGEF3	1.59908	3.05659	0.93468	0.99965	NEUTRAL
hsa-miR-615-3p	221.819	531.046	2.39405	1.25945	0.110381	UP	RAPGEF3	1.59908	3.05659	0.93468	0.99965	NEUTRAL
hsa-miR-615-3p	221.819	531.046	2.39405	1.25945	0.110381	UP	RAPGEF3	1.59908	3.05659	0.93468	0.99965	NEUTRAL
hsa-miR-671-5p	56.5864	116.636	2.0612	1.04348	0.222883	UP	RAPGEF3	1.59908	3.05659	0.93468	0.99965	NEUTRAL
hsa-miR-1343-3p	6.79037	11.4869	1.69164	0.758421	0.589942	NEUTRAL	RAPGEF3	1.59908	3.05659	0.93468	0.99965	NEUTRAL
hsa-miR-1343-3p	6.79037	11.4869	1.69164	0.758421	0.589942	NEUTRAL	RAPGEF3	1.59908	3.05659	0.93468	0.99965	NEUTRAL
hsa-miR-1343-3p	6.79037	11.4869	1.69164	0.758421	0.589942	NEUTRAL	RAPGEF3	1.59908	3.05659	0.93468	0.99965	NEUTRAL
hsa-miR-1343-3p	6.79037	11.4869	1.69164	0.758421	0.589942	NEUTRAL	RAPGEF3	1.59908	3.05659	0.93468	0.99965	NEUTRAL
hsa-miR-1343-3p	6.79037	11.4869	1.69164	0.758421	0.589942	NEUTRAL	RAPGEF3	1.59908	3.05659	0.93468	0.99965	NEUTRAL
hsa-miR-1343-3p	6.79037	11.4869	1.69164	0.758421	0.589942	NEUTRAL	RAPGEF3	1.59908	3.05659	0.93468	0.99965	NEUTRAL
hsa-miR-1343-3p	6.79037	11.4869	1.69164	0.758421	0.589942	NEUTRAL	RAPGEF3	1.59908	3.05659	0.93468	0.99965	NEUTRAL
hsa-miR-1343-3p	6.79037	11.4869	1.69164	0.758421	0.589942	NEUTRAL	RAPGEF3	1.59908	3.05659	0.93468	0.99965	NEUTRAL
hsa-miR-1343-3p	6.79037	11.4869	1.69164	0.758421	0.589942	NEUTRAL	RAPGEF3	1.59908	3.05659	0.93468	0.99965	NEUTRAL
hsa-miR-127-5p	275.01	384.368	1.39765	0.483003	0.538909	NEUTRAL	RAPGEF3	1.59908	3.05659	0.93468	0.99965	NEUTRAL
hsa-miR-766-3p	12.449	16.7885	1.34858	0.431439	0.754984	NEUTRAL	RAPGEF3	1.59908	3.05659	0.93468	0.99965	NEUTRAL
hsa-miR-210-5p	332.728	350.791	1.05429	0.0762664	0.926502	NEUTRAL	RAPGEF3	1.59908	3.05659	0.93468	0.99965	NEUTRAL
hsa-miR-210-5p	332.728	350.791	1.05429	0.0762664	0.926502	NEUTRAL	RAPGEF3	1.59908	3.05659	0.93468	0.99965	NEUTRAL
hsa-miR-210-5p	332.728	350.791	1.05429	0.0762664	0.926502	NEUTRAL	RAPGEF3	1.59908	3.05659	0.93468	0.99965	NEUTRAL
hsa-miR-370-3p	169.759	161.7	0.952522	-0.0701753	0.937972	NEUTRAL	RAPGEF3	1.59908	3.05659	0.93468	0.99965	NEUTRAL
hsa-miR-193b-3p	1105.7	918.064	0.830302	-0.268291	0.722076	NEUTRAL	RAPGEF3	1.59908	3.05659	0.93468	0.99965	NEUTRAL
hsa-miR-370-3p	169.759	161.7	0.952522	-0.0701753	0.937972	NEUTRAL	TCTE3	0.251237	0.478847	0.930518	0.99965	NEUTRAL
hsa-miR-370-3p	169.759	161.7	0.952522	-0.0701753	0.937972	NEUTRAL	TCTE3	0.251237	0.478847	0.930518	0.99965	NEUTRAL
hsa-miR-5787	12.449	3068.76	246.506	7.94548	1.13133e-14	UP	ATP6AP1L	0.757941	1.43864	0.924546	0.99965	NEUTRAL
hsa-miR-1304-5p	2.26346	8.83604	3.90378	1.96487	0.196082	UP	STXBP4	0.757664	1.43781	0.924242	0.99965	NEUTRAL
hsa-miR-1304-5p	2.26346	8.83604	3.90378	1.96487	0.196082	UP	STXBP4	0.757664	1.43781	0.924242	0.99965	NEUTRAL
hsa-miR-1307-3p	224.082	332.235	1.48265	0.568176	0.472159	NEUTRAL	ZNF460	0.752018	1.4264	0.92354	0.99965	NEUTRAL
hsa-miR-17-3p	71.2989	78.6408	1.10297	0.141397	0.885418	NEUTRAL	ZNF460	0.752018	1.4264	0.92354	0.99965	NEUTRAL
hsa-miR-17-3p	71.2989	78.6408	1.10297	0.141397	0.885418	NEUTRAL	ZNF460	0.752018	1.4264	0.92354	0.99965	NEUTRAL
hsa-miR-671-5p	56.5864	116.636	2.0612	1.04348	0.222883	UP	PF4V1	0.245301	0.465255	0.923471	0.99965	NEUTRAL
hsa-miR-30b-3p	18.1077	14.1377	0.780756	-0.357056	0.795423	NEUTRAL	PF4V1	0.245301	0.465255	0.923471	0.99965	NEUTRAL
hsa-miR-92b-5p	2.26346	11.4869	5.07491	2.34338	0.103638	UP	DDX26B	0.994593	1.88588	0.92306	0.99965	NEUTRAL
hsa-miR-92b-5p	2.26346	11.4869	5.07491	2.34338	0.103638	UP	DDX26B	0.994593	1.88588	0.92306	0.99965	NEUTRAL
hsa-miR-3158-3p	32.8201	39.7622	1.21152	0.276816	0.799143	NEUTRAL	CCDC159	3.90294	7.35701	0.914558	0.99965	NEUTRAL
hsa-miR-212-3p	24.898	24.7409	0.993689	-0.00913319	1	NEUTRAL	CCDC159	3.90294	7.35701	0.914558	0.99965	NEUTRAL
hsa-miR-212-3p	24.898	24.7409	0.993689	-0.00913319	1	NEUTRAL	CCDC159	3.90294	7.35701	0.914558	0.99965	NEUTRAL
hsa-miR-4466	12.449	7.06883	0.567822	-0.816488	0.536058	NEUTRAL	CCDC159	3.90294	7.35701	0.914558	0.99965	NEUTRAL
hsa-miR-4466	12.449	7.06883	0.567822	-0.816488	0.536058	NEUTRAL	CCDC159	3.90294	7.35701	0.914558	0.99965	NEUTRAL
hsa-miR-4466	12.449	7.06883	0.567822	-0.816488	0.536058	NEUTRAL	CCDC159	3.90294	7.35701	0.914558	0.99965	NEUTRAL
hsa-miR-4466	12.449	7.06883	0.567822	-0.816488	0.536058	NEUTRAL	CCDC159	3.90294	7.35701	0.914558	0.99965	NEUTRAL
hsa-miR-4466	12.449	7.06883	0.567822	-0.816488	0.536058	NEUTRAL	CCDC159	3.90294	7.35701	0.914558	0.99965	NEUTRAL
hsa-miR-4466	12.449	7.06883	0.567822	-0.816488	0.536058	NEUTRAL	CCDC159	3.90294	7.35701	0.914558	0.99965	NEUTRAL
hsa-miR-4466	12.449	7.06883	0.567822	-0.816488	0.536058	NEUTRAL	CCDC159	3.90294	7.35701	0.914558	0.99965	NEUTRAL
hsa-miR-4466	12.449	7.06883	0.567822	-0.816488	0.536058	NEUTRAL	CCDC159	3.90294	7.35701	0.914558	0.99965	NEUTRAL
hsa-miR-4466	12.449	7.06883	0.567822	-0.816488	0.536058	NEUTRAL	CCDC159	3.90294	7.35701	0.914558	0.99965	NEUTRAL
hsa-miR-4466	12.449	7.06883	0.567822	-0.816488	0.536058	NEUTRAL	CCDC159	3.90294	7.35701	0.914558	0.99965	NEUTRAL
hsa-miR-874-5p	14.7125	30.0425	2.04198	1.02997	0.342866	UP	ASB16	0.320901	0.601614	0.906709	0.99965	NEUTRAL
hsa-miR-874-5p	14.7125	30.0425	2.04198	1.02997	0.342866	UP	ASB16	0.320901	0.601614	0.906709	0.99965	NEUTRAL
hsa-miR-1301-3p	18.1077	25.6245	1.41512	0.500925	0.665757	NEUTRAL	ASB16	0.320901	0.601614	0.906709	0.99965	NEUTRAL
hsa-miR-1301-3p	18.1077	25.6245	1.41512	0.500925	0.665757	NEUTRAL	ASB16	0.320901	0.601614	0.906709	0.99965	NEUTRAL
hsa-miR-365b-5p	18.1077	22.0901	1.21993	0.2868	0.833175	NEUTRAL	ASB16	0.320901	0.601614	0.906709	0.99965	NEUTRAL
hsa-miR-365b-5p	18.1077	22.0901	1.21993	0.2868	0.833175	NEUTRAL	ASB16	0.320901	0.601614	0.906709	0.99965	NEUTRAL
hsa-miR-365b-5p	18.1077	22.0901	1.21993	0.2868	0.833175	NEUTRAL	ASB16	0.320901	0.601614	0.906709	0.99965	NEUTRAL
hsa-miR-1285-3p	115.436	132.541	1.14817	0.199337	0.816678	NEUTRAL	ASB16	0.320901	0.601614	0.906709	0.99965	NEUTRAL
hsa-miR-1285-3p	115.436	132.541	1.14817	0.199337	0.816678	NEUTRAL	ASB16	0.320901	0.601614	0.906709	0.99965	NEUTRAL
hsa-miR-4497	804.659	299.542	0.372259	-1.42562	0.0683607	DOWN	ASB16	0.320901	0.601614	0.906709	0.99965	NEUTRAL
hsa-miR-4497	804.659	299.542	0.372259	-1.42562	0.0683607	DOWN	ASB16	0.320901	0.601614	0.906709	0.99965	NEUTRAL
hsa-miR-4497	804.659	299.542	0.372259	-1.42562	0.0683607	DOWN	ASB16	0.320901	0.601614	0.906709	0.99965	NEUTRAL
hsa-miR-4532	43237.7	8708.8	0.201417	-2.31174	0.000347847	DOWN	ASB16	0.320901	0.601614	0.906709	0.99965	NEUTRAL
hsa-miR-4532	43237.7	8708.8	0.201417	-2.31174	0.000347847	DOWN	ASB16	0.320901	0.601614	0.906709	0.99965	NEUTRAL
hsa-miR-4532	43237.7	8708.8	0.201417	-2.31174	0.000347847	DOWN	ASB16	0.320901	0.601614	0.906709	0.99965	NEUTRAL
hsa-miR-197-3p	679.037	664.47	0.978547	-0.0312863	0.969098	NEUTRAL	RP11-641D5.1	0.357819	0.670078	0.905098	0.99965	NEUTRAL
hsa-miR-4516	14.7125	26.5081	1.80174	0.849394	0.44668	NEUTRAL	LMNB1	0.704454	1.31772	0.903463	0.99965	NEUTRAL
hsa-miR-134-5p	393.842	540.766	1.37305	0.457388	0.556254	NEUTRAL	LMNB1	0.704454	1.31772	0.903463	0.99965	NEUTRAL
hsa-miR-134-5p	393.842	540.766	1.37305	0.457388	0.556254	NEUTRAL	LMNB1	0.704454	1.31772	0.903463	0.99965	NEUTRAL
hsa-miR-134-5p	393.842	540.766	1.37305	0.457388	0.556254	NEUTRAL	LMNB1	0.704454	1.31772	0.903463	0.99965	NEUTRAL
hsa-miR-134-5p	393.842	540.766	1.37305	0.457388	0.556254	NEUTRAL	LMNB1	0.704454	1.31772	0.903463	0.99965	NEUTRAL
hsa-miR-134-5p	393.842	540.766	1.37305	0.457388	0.556254	NEUTRAL	LMNB1	0.704454	1.31772	0.903463	0.99965	NEUTRAL
hsa-miR-134-5p	393.842	540.766	1.37305	0.457388	0.556254	NEUTRAL	LMNB1	0.704454	1.31772	0.903463	0.99965	NEUTRAL
hsa-miR-2277-5p	35.0836	47.7146	1.36003	0.443635	0.654588	NEUTRAL	LMNB1	0.704454	1.31772	0.903463	0.99965	NEUTRAL
hsa-miR-3180-3p	10.1856	13.2541	1.30126	0.379909	0.813853	NEUTRAL	LMNB1	0.704454	1.31772	0.903463	0.99965	NEUTRAL
hsa-miR-423-3p	8683.75	8127.39	0.93593	-0.095527	0.886688	NEUTRAL	LMNB1	0.704454	1.31772	0.903463	0.99965	NEUTRAL
hsa-miR-423-3p	8683.75	8127.39	0.93593	-0.095527	0.886688	NEUTRAL	LMNB1	0.704454	1.31772	0.903463	0.99965	NEUTRAL
hsa-miR-423-3p	8683.75	8127.39	0.93593	-0.095527	0.886688	NEUTRAL	LMNB1	0.704454	1.31772	0.903463	0.99965	NEUTRAL
hsa-miR-423-3p	8683.75	8127.39	0.93593	-0.095527	0.886688	NEUTRAL	LMNB1	0.704454	1.31772	0.903463	0.99965	NEUTRAL
hsa-miR-423-3p	8683.75	8127.39	0.93593	-0.095527	0.886688	NEUTRAL	LMNB1	0.704454	1.31772	0.903463	0.99965	NEUTRAL
hsa-miR-339-5p	38.4788	199.694	5.18973	2.37566	0.00610349	UP	PSORS1C1	0.571086	1.06788	0.902965	0.99965	NEUTRAL
hsa-miR-339-5p	38.4788	199.694	5.18973	2.37566	0.00610349	UP	PSORS1C1	0.571086	1.06788	0.902965	0.99965	NEUTRAL
hsa-miR-339-5p	38.4788	199.694	5.18973	2.37566	0.00610349	UP	PSORS1C1	0.571086	1.06788	0.902965	0.99965	NEUTRAL
hsa-miR-339-5p	38.4788	199.694	5.18973	2.37566	0.00610349	UP	PSORS1C1	0.571086	1.06788	0.902965	0.99965	NEUTRAL
hsa-miR-339-5p	38.4788	199.694	5.18973	2.37566	0.00610349	UP	PSORS1C1	0.571086	1.06788	0.902965	0.99965	NEUTRAL
hsa-miR-339-5p	38.4788	199.694	5.18973	2.37566	0.00610349	UP	PSORS1C1	0.571086	1.06788	0.902965	0.99965	NEUTRAL
hsa-miR-185-3p	5.65864	12.3705	2.18612	1.12837	0.393641	UP	PSORS1C1	0.571086	1.06788	0.902965	0.99965	NEUTRAL
hsa-miR-766-3p	12.449	16.7885	1.34858	0.431439	0.754984	NEUTRAL	PSORS1C1	0.571086	1.06788	0.902965	0.99965	NEUTRAL
hsa-miR-766-3p	12.449	16.7885	1.34858	0.431439	0.754984	NEUTRAL	PSORS1C1	0.571086	1.06788	0.902965	0.99965	NEUTRAL
hsa-miR-766-3p	12.449	16.7885	1.34858	0.431439	0.754984	NEUTRAL	PSORS1C1	0.571086	1.06788	0.902965	0.99965	NEUTRAL
hsa-miR-766-3p	12.449	16.7885	1.34858	0.431439	0.754984	NEUTRAL	PSORS1C1	0.571086	1.06788	0.902965	0.99965	NEUTRAL
hsa-miR-766-3p	12.449	16.7885	1.34858	0.431439	0.754984	NEUTRAL	PSORS1C1	0.571086	1.06788	0.902965	0.99965	NEUTRAL
hsa-miR-766-3p	12.449	16.7885	1.34858	0.431439	0.754984	NEUTRAL	PSORS1C1	0.571086	1.06788	0.902965	0.99965	NEUTRAL
hsa-miR-370-3p	169.759	161.7	0.952522	-0.0701753	0.937972	NEUTRAL	PSORS1C1	0.571086	1.06788	0.902965	0.99965	NEUTRAL
hsa-miR-370-3p	169.759	161.7	0.952522	-0.0701753	0.937972	NEUTRAL	PSORS1C1	0.571086	1.06788	0.902965	0.99965	NEUTRAL
hsa-miR-370-3p	169.759	161.7	0.952522	-0.0701753	0.937972	NEUTRAL	PSORS1C1	0.571086	1.06788	0.902965	0.99965	NEUTRAL
hsa-miR-370-3p	169.759	161.7	0.952522	-0.0701753	0.937972	NEUTRAL	PSORS1C1	0.571086	1.06788	0.902965	0.99965	NEUTRAL
hsa-miR-370-3p	169.759	161.7	0.952522	-0.0701753	0.937972	NEUTRAL	PSORS1C1	0.571086	1.06788	0.902965	0.99965	NEUTRAL
hsa-miR-370-3p	169.759	161.7	0.952522	-0.0701753	0.937972	NEUTRAL	PSORS1C1	0.571086	1.06788	0.902965	0.99965	NEUTRAL
hsa-miR-146b-3p	18.1077	3.53442	0.195189	-2.35706	0.0605725	DOWN	PSORS1C1	0.571086	1.06788	0.902965	0.99965	NEUTRAL
hsa-miR-146b-3p	18.1077	3.53442	0.195189	-2.35706	0.0605725	DOWN	PSORS1C1	0.571086	1.06788	0.902965	0.99965	NEUTRAL
hsa-miR-146b-3p	18.1077	3.53442	0.195189	-2.35706	0.0605725	DOWN	PSORS1C1	0.571086	1.06788	0.902965	0.99965	NEUTRAL
hsa-miR-146b-3p	18.1077	3.53442	0.195189	-2.35706	0.0605725	DOWN	PSORS1C1	0.571086	1.06788	0.902965	0.99965	NEUTRAL
hsa-miR-146b-3p	18.1077	3.53442	0.195189	-2.35706	0.0605725	DOWN	PSORS1C1	0.571086	1.06788	0.902965	0.99965	NEUTRAL
hsa-miR-146b-3p	18.1077	3.53442	0.195189	-2.35706	0.0605725	DOWN	PSORS1C1	0.571086	1.06788	0.902965	0.99965	NEUTRAL
hsa-miR-668-3p	49.7961	23.8573	0.4791	-1.0616	0.273393	DOWN	KRT18	26.8881	50.2744	0.902856	0.99965	NEUTRAL
hsa-miR-1343-3p	6.79037	11.4869	1.69164	0.758421	0.589942	NEUTRAL	GUSBP2	0.249254	0.465192	0.90021	0.99965	NEUTRAL
hsa-miR-3180-3p	10.1856	13.2541	1.30126	0.379909	0.813853	NEUTRAL	HID1	0.315506	0.588576	0.899561	0.99965	NEUTRAL
hsa-miR-3180-3p	10.1856	13.2541	1.30126	0.379909	0.813853	NEUTRAL	HID1	0.315506	0.588576	0.899561	0.99965	NEUTRAL
hsa-miR-3180-3p	10.1856	13.2541	1.30126	0.379909	0.813853	NEUTRAL	HID1	0.315506	0.588576	0.899561	0.99965	NEUTRAL
hsa-miR-874-5p	14.7125	30.0425	2.04198	1.02997	0.342866	UP	CYFIP2	1.53865	2.86946	0.899114	0.99965	NEUTRAL
hsa-miR-874-5p	14.7125	30.0425	2.04198	1.02997	0.342866	UP	CYFIP2	1.53865	2.86946	0.899114	0.99965	NEUTRAL
hsa-miR-874-5p	14.7125	30.0425	2.04198	1.02997	0.342866	UP	CYFIP2	1.53865	2.86946	0.899114	0.99965	NEUTRAL
hsa-miR-874-5p	14.7125	30.0425	2.04198	1.02997	0.342866	UP	CYFIP2	1.53865	2.86946	0.899114	0.99965	NEUTRAL
hsa-miR-874-5p	14.7125	30.0425	2.04198	1.02997	0.342866	UP	CYFIP2	1.53865	2.86946	0.899114	0.99965	NEUTRAL
hsa-miR-874-5p	14.7125	30.0425	2.04198	1.02997	0.342866	UP	CYFIP2	1.53865	2.86946	0.899114	0.99965	NEUTRAL
hsa-miR-874-5p	14.7125	30.0425	2.04198	1.02997	0.342866	UP	CYFIP2	1.53865	2.86946	0.899114	0.99965	NEUTRAL
hsa-miR-874-5p	14.7125	30.0425	2.04198	1.02997	0.342866	UP	CYFIP2	1.53865	2.86946	0.899114	0.99965	NEUTRAL
hsa-miR-214-3p	1156.63	1241.46	1.07335	0.102118	0.892839	NEUTRAL	CYFIP2	1.53865	2.86946	0.899114	0.99965	NEUTRAL
hsa-miR-214-3p	1156.63	1241.46	1.07335	0.102118	0.892839	NEUTRAL	CYFIP2	1.53865	2.86946	0.899114	0.99965	NEUTRAL
hsa-miR-6852-5p	14.7125	10.6032	0.720698	-0.472534	0.734391	NEUTRAL	CYFIP2	1.53865	2.86946	0.899114	0.99965	NEUTRAL
hsa-miR-210-3p	2899.49	2969.79	1.02425	0.0345636	0.96243	NEUTRAL	ANK2	1.72579	3.21814	0.898971	0.99965	NEUTRAL
hsa-miR-210-3p	2899.49	2969.79	1.02425	0.0345636	0.96243	NEUTRAL	ANK2	1.72579	3.21814	0.898971	0.99965	NEUTRAL
hsa-miR-210-3p	2899.49	2969.79	1.02425	0.0345636	0.96243	NEUTRAL	ANK2	1.72579	3.21814	0.898971	0.99965	NEUTRAL
hsa-miR-210-3p	2899.49	2969.79	1.02425	0.0345636	0.96243	NEUTRAL	ANK2	1.72579	3.21814	0.898971	0.99965	NEUTRAL
hsa-miR-210-3p	2899.49	2969.79	1.02425	0.0345636	0.96243	NEUTRAL	ANK2	1.72579	3.21814	0.898971	0.99965	NEUTRAL
hsa-miR-210-3p	2899.49	2969.79	1.02425	0.0345636	0.96243	NEUTRAL	ANK2	1.72579	3.21814	0.898971	0.99965	NEUTRAL
hsa-miR-210-3p	2899.49	2969.79	1.02425	0.0345636	0.96243	NEUTRAL	ANK2	1.72579	3.21814	0.898971	0.99965	NEUTRAL
hsa-miR-370-3p	169.759	161.7	0.952522	-0.0701753	0.937972	NEUTRAL	ANK2	1.72579	3.21814	0.898971	0.99965	NEUTRAL
hsa-miR-370-3p	169.759	161.7	0.952522	-0.0701753	0.937972	NEUTRAL	ANK2	1.72579	3.21814	0.898971	0.99965	NEUTRAL
hsa-miR-370-3p	169.759	161.7	0.952522	-0.0701753	0.937972	NEUTRAL	ANK2	1.72579	3.21814	0.898971	0.99965	NEUTRAL
hsa-miR-370-3p	169.759	161.7	0.952522	-0.0701753	0.937972	NEUTRAL	ANK2	1.72579	3.21814	0.898971	0.99965	NEUTRAL
hsa-miR-370-3p	169.759	161.7	0.952522	-0.0701753	0.937972	NEUTRAL	ANK2	1.72579	3.21814	0.898971	0.99965	NEUTRAL
hsa-miR-370-3p	169.759	161.7	0.952522	-0.0701753	0.937972	NEUTRAL	ANK2	1.72579	3.21814	0.898971	0.99965	NEUTRAL
hsa-miR-370-3p	169.759	161.7	0.952522	-0.0701753	0.937972	NEUTRAL	ANK2	1.72579	3.21814	0.898971	0.99965	NEUTRAL
hsa-miR-5787	12.449	3068.76	246.506	7.94548	1.13133e-14	UP	B4GALNT4	2.53699	4.72783	0.898059	0.99965	NEUTRAL
hsa-miR-339-5p	38.4788	199.694	5.18973	2.37566	0.00610349	UP	B4GALNT4	2.53699	4.72783	0.898059	0.99965	NEUTRAL
hsa-miR-339-5p	38.4788	199.694	5.18973	2.37566	0.00610349	UP	B4GALNT4	2.53699	4.72783	0.898059	0.99965	NEUTRAL
hsa-miR-615-3p	221.819	531.046	2.39405	1.25945	0.110381	UP	B4GALNT4	2.53699	4.72783	0.898059	0.99965	NEUTRAL
hsa-miR-3605-3p	28.2932	18.5557	0.655835	-0.608595	0.579037	NEUTRAL	B4GALNT4	2.53699	4.72783	0.898059	0.99965	NEUTRAL
hsa-miR-3605-3p	28.2932	18.5557	0.655835	-0.608595	0.579037	NEUTRAL	B4GALNT4	2.53699	4.72783	0.898059	0.99965	NEUTRAL
hsa-miR-3605-3p	28.2932	18.5557	0.655835	-0.608595	0.579037	NEUTRAL	B4GALNT4	2.53699	4.72783	0.898059	0.99965	NEUTRAL
hsa-miR-4532	43237.7	8708.8	0.201417	-2.31174	0.000347847	DOWN	B4GALNT4	2.53699	4.72783	0.898059	0.99965	NEUTRAL
hsa-miR-3180-3p	10.1856	13.2541	1.30126	0.379909	0.813853	NEUTRAL	CEP72	0.571224	1.06425	0.897703	0.99965	NEUTRAL
hsa-miR-431-3p	66.772	68.9211	1.03219	0.0457027	0.97798	NEUTRAL	CEP72	0.571224	1.06425	0.897703	0.99965	NEUTRAL
hsa-miR-3074-5p	30.5567	30.0425	0.983174	-0.0244812	1	NEUTRAL	CEP72	0.571224	1.06425	0.897703	0.99965	NEUTRAL
hsa-miR-3074-5p	30.5567	30.0425	0.983174	-0.0244812	1	NEUTRAL	CEP72	0.571224	1.06425	0.897703	0.99965	NEUTRAL
hsa-miR-28-5p	890.671	1619.65	1.81846	0.862715	0.250733	NEUTRAL	SLC31A2	0.26973	0.502188	0.896714	0.99965	NEUTRAL
hsa-miR-28-5p	890.671	1619.65	1.81846	0.862715	0.250733	NEUTRAL	SLC31A2	0.26973	0.502188	0.896714	0.99965	NEUTRAL
hsa-miR-331-3p	379.129	285.404	0.752789	-0.409683	0.601587	NEUTRAL	DHX34	2.39521	4.45437	0.89507	0.99965	NEUTRAL
hsa-miR-331-3p	379.129	285.404	0.752789	-0.409683	0.601587	NEUTRAL	DHX34	2.39521	4.45437	0.89507	0.99965	NEUTRAL
hsa-miR-3176	13.5807	32.6933	2.40733	1.26743	0.238661	UP	MX1	0.21514	0.399764	0.893874	0.99965	NEUTRAL
hsa-miR-24-3p	1576.5	1563.98	0.992059	-0.0115024	0.988146	NEUTRAL	MX1	0.21514	0.399764	0.893874	0.99965	NEUTRAL
hsa-miR-24-3p	1576.5	1563.98	0.992059	-0.0115024	0.988146	NEUTRAL	MX1	0.21514	0.399764	0.893874	0.99965	NEUTRAL
hsa-miR-5787	12.449	3068.76	246.506	7.94548	1.13133e-14	UP	TNIK	0.375713	0.694579	0.886509	0.99965	NEUTRAL
hsa-miR-5787	12.449	3068.76	246.506	7.94548	1.13133e-14	UP	TNIK	0.375713	0.694579	0.886509	0.99965	NEUTRAL
hsa-miR-5787	12.449	3068.76	246.506	7.94548	1.13133e-14	UP	TNIK	0.375713	0.694579	0.886509	0.99965	NEUTRAL
hsa-miR-5787	12.449	3068.76	246.506	7.94548	1.13133e-14	UP	TNIK	0.375713	0.694579	0.886509	0.99965	NEUTRAL
hsa-miR-5787	12.449	3068.76	246.506	7.94548	1.13133e-14	UP	TNIK	0.375713	0.694579	0.886509	0.99965	NEUTRAL
hsa-miR-5787	12.449	3068.76	246.506	7.94548	1.13133e-14	UP	TNIK	0.375713	0.694579	0.886509	0.99965	NEUTRAL
hsa-miR-5787	12.449	3068.76	246.506	7.94548	1.13133e-14	UP	TNIK	0.375713	0.694579	0.886509	0.99965	NEUTRAL
hsa-miR-5787	12.449	3068.76	246.506	7.94548	1.13133e-14	UP	TNIK	0.375713	0.694579	0.886509	0.99965	NEUTRAL
hsa-miR-766-3p	12.449	16.7885	1.34858	0.431439	0.754984	NEUTRAL	TNIK	0.375713	0.694579	0.886509	0.99965	NEUTRAL
hsa-miR-766-3p	12.449	16.7885	1.34858	0.431439	0.754984	NEUTRAL	TNIK	0.375713	0.694579	0.886509	0.99965	NEUTRAL
hsa-miR-766-3p	12.449	16.7885	1.34858	0.431439	0.754984	NEUTRAL	TNIK	0.375713	0.694579	0.886509	0.99965	NEUTRAL
hsa-miR-766-3p	12.449	16.7885	1.34858	0.431439	0.754984	NEUTRAL	TNIK	0.375713	0.694579	0.886509	0.99965	NEUTRAL
hsa-miR-766-3p	12.449	16.7885	1.34858	0.431439	0.754984	NEUTRAL	TNIK	0.375713	0.694579	0.886509	0.99965	NEUTRAL
hsa-miR-766-3p	12.449	16.7885	1.34858	0.431439	0.754984	NEUTRAL	TNIK	0.375713	0.694579	0.886509	0.99965	NEUTRAL
hsa-miR-766-3p	12.449	16.7885	1.34858	0.431439	0.754984	NEUTRAL	TNIK	0.375713	0.694579	0.886509	0.99965	NEUTRAL
hsa-miR-766-3p	12.449	16.7885	1.34858	0.431439	0.754984	NEUTRAL	TNIK	0.375713	0.694579	0.886509	0.99965	NEUTRAL
hsa-miR-210-3p	2899.49	2969.79	1.02425	0.0345636	0.96243	NEUTRAL	TNIK	0.375713	0.694579	0.886509	0.99965	NEUTRAL
hsa-miR-210-3p	2899.49	2969.79	1.02425	0.0345636	0.96243	NEUTRAL	TNIK	0.375713	0.694579	0.886509	0.99965	NEUTRAL
hsa-miR-210-3p	2899.49	2969.79	1.02425	0.0345636	0.96243	NEUTRAL	TNIK	0.375713	0.694579	0.886509	0.99965	NEUTRAL
hsa-miR-339-3p	837.479	635.311	0.758599	-0.39859	0.601644	NEUTRAL	TNIK	0.375713	0.694579	0.886509	0.99965	NEUTRAL
hsa-miR-339-3p	837.479	635.311	0.758599	-0.39859	0.601644	NEUTRAL	TNIK	0.375713	0.694579	0.886509	0.99965	NEUTRAL
hsa-miR-339-3p	837.479	635.311	0.758599	-0.39859	0.601644	NEUTRAL	TNIK	0.375713	0.694579	0.886509	0.99965	NEUTRAL
hsa-miR-138-5p	10404	7145.71	0.686824	-0.541988	0.419407	NEUTRAL	TNIK	0.375713	0.694579	0.886509	0.99965	NEUTRAL
hsa-miR-138-5p	10404	7145.71	0.686824	-0.541988	0.419407	NEUTRAL	TNIK	0.375713	0.694579	0.886509	0.99965	NEUTRAL
hsa-miR-138-5p	10404	7145.71	0.686824	-0.541988	0.419407	NEUTRAL	TNIK	0.375713	0.694579	0.886509	0.99965	NEUTRAL
hsa-miR-138-5p	10404	7145.71	0.686824	-0.541988	0.419407	NEUTRAL	TNIK	0.375713	0.694579	0.886509	0.99965	NEUTRAL
hsa-miR-138-5p	10404	7145.71	0.686824	-0.541988	0.419407	NEUTRAL	TNIK	0.375713	0.694579	0.886509	0.99965	NEUTRAL
hsa-miR-138-5p	10404	7145.71	0.686824	-0.541988	0.419407	NEUTRAL	TNIK	0.375713	0.694579	0.886509	0.99965	NEUTRAL
hsa-miR-138-5p	10404	7145.71	0.686824	-0.541988	0.419407	NEUTRAL	TNIK	0.375713	0.694579	0.886509	0.99965	NEUTRAL
hsa-miR-138-5p	10404	7145.71	0.686824	-0.541988	0.419407	NEUTRAL	TNIK	0.375713	0.694579	0.886509	0.99965	NEUTRAL
hsa-miR-138-5p	10404	7145.71	0.686824	-0.541988	0.419407	NEUTRAL	TNIK	0.375713	0.694579	0.886509	0.99965	NEUTRAL
hsa-miR-185-3p	5.65864	12.3705	2.18612	1.12837	0.393641	UP	RGS14	0.218871	0.403774	0.883468	0.99965	NEUTRAL
hsa-miR-185-3p	5.65864	12.3705	2.18612	1.12837	0.393641	UP	RGS14	0.218871	0.403774	0.883468	0.99965	NEUTRAL
hsa-miR-766-3p	12.449	16.7885	1.34858	0.431439	0.754984	NEUTRAL	RGS14	0.218871	0.403774	0.883468	0.99965	NEUTRAL
hsa-miR-766-3p	12.449	16.7885	1.34858	0.431439	0.754984	NEUTRAL	RGS14	0.218871	0.403774	0.883468	0.99965	NEUTRAL
hsa-miR-766-3p	12.449	16.7885	1.34858	0.431439	0.754984	NEUTRAL	RGS14	0.218871	0.403774	0.883468	0.99965	NEUTRAL
hsa-miR-766-3p	12.449	16.7885	1.34858	0.431439	0.754984	NEUTRAL	RGS14	0.218871	0.403774	0.883468	0.99965	NEUTRAL
hsa-miR-766-3p	12.449	16.7885	1.34858	0.431439	0.754984	NEUTRAL	RGS14	0.218871	0.403774	0.883468	0.99965	NEUTRAL
hsa-miR-671-3p	499.092	227.086	0.454998	-1.13607	0.148581	DOWN	RGS14	0.218871	0.403774	0.883468	0.99965	NEUTRAL
hsa-miR-671-3p	499.092	227.086	0.454998	-1.13607	0.148581	DOWN	RGS14	0.218871	0.403774	0.883468	0.99965	NEUTRAL
hsa-miR-671-3p	499.092	227.086	0.454998	-1.13607	0.148581	DOWN	RGS14	0.218871	0.403774	0.883468	0.99965	NEUTRAL
hsa-miR-671-3p	499.092	227.086	0.454998	-1.13607	0.148581	DOWN	RGS14	0.218871	0.403774	0.883468	0.99965	NEUTRAL
hsa-miR-671-3p	499.092	227.086	0.454998	-1.13607	0.148581	DOWN	RGS14	0.218871	0.403774	0.883468	0.99965	NEUTRAL
hsa-miR-671-3p	499.092	227.086	0.454998	-1.13607	0.148581	DOWN	RGS14	0.218871	0.403774	0.883468	0.99965	NEUTRAL
hsa-miR-193a-5p	2032.58	3243.71	1.59585	0.674329	0.351123	NEUTRAL	FGFR2	3.07141	5.66586	0.883396	0.814483	NEUTRAL
hsa-miR-193a-5p	2032.58	3243.71	1.59585	0.674329	0.351123	NEUTRAL	FGFR2	3.07141	5.66586	0.883396	0.814483	NEUTRAL
hsa-miR-193a-5p	2032.58	3243.71	1.59585	0.674329	0.351123	NEUTRAL	FGFR2	3.07141	5.66586	0.883396	0.814483	NEUTRAL
hsa-miR-193a-5p	2032.58	3243.71	1.59585	0.674329	0.351123	NEUTRAL	FGFR2	3.07141	5.66586	0.883396	0.814483	NEUTRAL
hsa-miR-193a-5p	2032.58	3243.71	1.59585	0.674329	0.351123	NEUTRAL	FGFR2	3.07141	5.66586	0.883396	0.814483	NEUTRAL
hsa-miR-193a-5p	2032.58	3243.71	1.59585	0.674329	0.351123	NEUTRAL	FGFR2	3.07141	5.66586	0.883396	0.814483	NEUTRAL
hsa-miR-193a-5p	2032.58	3243.71	1.59585	0.674329	0.351123	NEUTRAL	FGFR2	3.07141	5.66586	0.883396	0.814483	NEUTRAL
hsa-miR-193a-5p	2032.58	3243.71	1.59585	0.674329	0.351123	NEUTRAL	FGFR2	3.07141	5.66586	0.883396	0.814483	NEUTRAL
hsa-miR-193a-5p	2032.58	3243.71	1.59585	0.674329	0.351123	NEUTRAL	FGFR2	3.07141	5.66586	0.883396	0.814483	NEUTRAL
hsa-miR-193a-5p	2032.58	3243.71	1.59585	0.674329	0.351123	NEUTRAL	FGFR2	3.07141	5.66586	0.883396	0.814483	NEUTRAL
hsa-miR-2277-5p	35.0836	47.7146	1.36003	0.443635	0.654588	NEUTRAL	FGFR2	3.07141	5.66586	0.883396	0.814483	NEUTRAL
hsa-miR-2277-5p	35.0836	47.7146	1.36003	0.443635	0.654588	NEUTRAL	FGFR2	3.07141	5.66586	0.883396	0.814483	NEUTRAL
hsa-miR-2277-5p	35.0836	47.7146	1.36003	0.443635	0.654588	NEUTRAL	FGFR2	3.07141	5.66586	0.883396	0.814483	NEUTRAL
hsa-miR-2277-5p	35.0836	47.7146	1.36003	0.443635	0.654588	NEUTRAL	FGFR2	3.07141	5.66586	0.883396	0.814483	NEUTRAL
hsa-miR-2277-5p	35.0836	47.7146	1.36003	0.443635	0.654588	NEUTRAL	FGFR2	3.07141	5.66586	0.883396	0.814483	NEUTRAL
hsa-miR-2277-5p	35.0836	47.7146	1.36003	0.443635	0.654588	NEUTRAL	FGFR2	3.07141	5.66586	0.883396	0.814483	NEUTRAL
hsa-miR-2277-5p	35.0836	47.7146	1.36003	0.443635	0.654588	NEUTRAL	FGFR2	3.07141	5.66586	0.883396	0.814483	NEUTRAL
hsa-miR-2277-5p	35.0836	47.7146	1.36003	0.443635	0.654588	NEUTRAL	FGFR2	3.07141	5.66586	0.883396	0.814483	NEUTRAL
hsa-miR-2277-5p	35.0836	47.7146	1.36003	0.443635	0.654588	NEUTRAL	FGFR2	3.07141	5.66586	0.883396	0.814483	NEUTRAL
hsa-miR-2277-5p	35.0836	47.7146	1.36003	0.443635	0.654588	NEUTRAL	FGFR2	3.07141	5.66586	0.883396	0.814483	NEUTRAL
hsa-miR-1285-3p	115.436	132.541	1.14817	0.199337	0.816678	NEUTRAL	FGFR2	3.07141	5.66586	0.883396	0.814483	NEUTRAL
hsa-miR-484	1291.3	1132.78	0.877238	-0.188959	0.800823	NEUTRAL	FGFR2	3.07141	5.66586	0.883396	0.814483	NEUTRAL
hsa-miR-4532	43237.7	8708.8	0.201417	-2.31174	0.000347847	DOWN	FGFR2	3.07141	5.66586	0.883396	0.814483	NEUTRAL
hsa-miR-4532	43237.7	8708.8	0.201417	-2.31174	0.000347847	DOWN	FGFR2	3.07141	5.66586	0.883396	0.814483	NEUTRAL
hsa-miR-4532	43237.7	8708.8	0.201417	-2.31174	0.000347847	DOWN	FGFR2	3.07141	5.66586	0.883396	0.814483	NEUTRAL
hsa-miR-4532	43237.7	8708.8	0.201417	-2.31174	0.000347847	DOWN	FGFR2	3.07141	5.66586	0.883396	0.814483	NEUTRAL
hsa-miR-4532	43237.7	8708.8	0.201417	-2.31174	0.000347847	DOWN	FGFR2	3.07141	5.66586	0.883396	0.814483	NEUTRAL
hsa-miR-4532	43237.7	8708.8	0.201417	-2.31174	0.000347847	DOWN	FGFR2	3.07141	5.66586	0.883396	0.814483	NEUTRAL
hsa-miR-4532	43237.7	8708.8	0.201417	-2.31174	0.000347847	DOWN	FGFR2	3.07141	5.66586	0.883396	0.814483	NEUTRAL
hsa-miR-1285-3p	115.436	132.541	1.14817	0.199337	0.816678	NEUTRAL	MLLT10	5.16168	9.51829	0.882862	0.99965	NEUTRAL
hsa-miR-1285-3p	115.436	132.541	1.14817	0.199337	0.816678	NEUTRAL	MLLT10	5.16168	9.51829	0.882862	0.99965	NEUTRAL
hsa-miR-93-5p	770.707	1123.06	1.45718	0.543181	0.473409	NEUTRAL	PRKY,RNU6-941P	2.43305	4.45465	0.872546	0.99965	NEUTRAL
hsa-miR-125a-3p	102.987	122.821	1.19258	0.25409	0.767038	NEUTRAL	PRKY,RNU6-941P	2.43305	4.45465	0.872546	0.99965	NEUTRAL
hsa-miR-5787	12.449	3068.76	246.506	7.94548	1.13133e-14	UP	HLA-F	3.46751	6.29833	0.861068	0.99965	NEUTRAL
hsa-miR-331-3p	379.129	285.404	0.752789	-0.409683	0.601587	NEUTRAL	ASPN	0.947694	1.71214	0.853309	0.99965	NEUTRAL
hsa-miR-331-3p	379.129	285.404	0.752789	-0.409683	0.601587	NEUTRAL	ASPN	0.947694	1.71214	0.853309	0.99965	NEUTRAL
hsa-miR-4508	174.286	101.614	0.583032	-0.778353	0.340317	NEUTRAL	C9orf116	0.990196	1.78422	0.849505	0.99965	NEUTRAL
hsa-miR-4508	174.286	101.614	0.583032	-0.778353	0.340317	NEUTRAL	C9orf116	0.990196	1.78422	0.849505	0.99965	NEUTRAL
hsa-miR-3176	13.5807	32.6933	2.40733	1.26743	0.238661	UP	GNB3	1.02335	1.84266	0.848498	0.99965	NEUTRAL
hsa-miR-3176	13.5807	32.6933	2.40733	1.26743	0.238661	UP	GNB3	1.02335	1.84266	0.848498	0.99965	NEUTRAL
hsa-miR-3176	13.5807	32.6933	2.40733	1.26743	0.238661	UP	GNB3	1.02335	1.84266	0.848498	0.99965	NEUTRAL
hsa-miR-766-3p	12.449	16.7885	1.34858	0.431439	0.754984	NEUTRAL	GNB3	1.02335	1.84266	0.848498	0.99965	NEUTRAL
hsa-miR-766-3p	12.449	16.7885	1.34858	0.431439	0.754984	NEUTRAL	GNB3	1.02335	1.84266	0.848498	0.99965	NEUTRAL
hsa-miR-766-3p	12.449	16.7885	1.34858	0.431439	0.754984	NEUTRAL	GNB3	1.02335	1.84266	0.848498	0.99965	NEUTRAL
hsa-miR-671-3p	499.092	227.086	0.454998	-1.13607	0.148581	DOWN	GNB3	1.02335	1.84266	0.848498	0.99965	NEUTRAL
hsa-miR-671-3p	499.092	227.086	0.454998	-1.13607	0.148581	DOWN	GNB3	1.02335	1.84266	0.848498	0.99965	NEUTRAL
hsa-miR-671-3p	499.092	227.086	0.454998	-1.13607	0.148581	DOWN	GNB3	1.02335	1.84266	0.848498	0.99965	NEUTRAL
hsa-miR-671-3p	499.092	227.086	0.454998	-1.13607	0.148581	DOWN	GNB3	1.02335	1.84266	0.848498	0.99965	NEUTRAL
hsa-miR-1343-3p	6.79037	11.4869	1.69164	0.758421	0.589942	NEUTRAL	RALGPS1	0.401416	0.722033	0.846968	0.99965	NEUTRAL
hsa-miR-654-5p	44.1374	49.4818	1.12109	0.164896	0.881604	NEUTRAL	RALGPS1	0.401416	0.722033	0.846968	0.99965	NEUTRAL
hsa-miR-654-5p	44.1374	49.4818	1.12109	0.164896	0.881604	NEUTRAL	RALGPS1	0.401416	0.722033	0.846968	0.99965	NEUTRAL
hsa-miR-324-3p	18.1077	17.6721	0.975945	-0.0351284	1	NEUTRAL	RALGPS1	0.401416	0.722033	0.846968	0.99965	NEUTRAL
hsa-miR-324-3p	18.1077	17.6721	0.975945	-0.0351284	1	NEUTRAL	RALGPS1	0.401416	0.722033	0.846968	0.99965	NEUTRAL
hsa-miR-4516	14.7125	26.5081	1.80174	0.849394	0.44668	NEUTRAL	ADAMTS10	9.53559	17.1346	0.845521	0.99965	NEUTRAL
hsa-miR-4516	14.7125	26.5081	1.80174	0.849394	0.44668	NEUTRAL	ADAMTS10	9.53559	17.1346	0.845521	0.99965	NEUTRAL
hsa-miR-4516	14.7125	26.5081	1.80174	0.849394	0.44668	NEUTRAL	ADAMTS10	9.53559	17.1346	0.845521	0.99965	NEUTRAL
hsa-miR-4516	14.7125	26.5081	1.80174	0.849394	0.44668	NEUTRAL	ADAMTS10	9.53559	17.1346	0.845521	0.99965	NEUTRAL
hsa-miR-4516	14.7125	26.5081	1.80174	0.849394	0.44668	NEUTRAL	ADAMTS10	9.53559	17.1346	0.845521	0.99965	NEUTRAL
hsa-miR-324-5p	21.5028	34.4606	1.6026	0.680418	0.518056	NEUTRAL	ADAMTS10	9.53559	17.1346	0.845521	0.99965	NEUTRAL
hsa-miR-127-5p	275.01	384.368	1.39765	0.483003	0.538909	NEUTRAL	ADAMTS10	9.53559	17.1346	0.845521	0.99965	NEUTRAL
hsa-miR-127-5p	275.01	384.368	1.39765	0.483003	0.538909	NEUTRAL	ADAMTS10	9.53559	17.1346	0.845521	0.99965	NEUTRAL
hsa-miR-127-5p	275.01	384.368	1.39765	0.483003	0.538909	NEUTRAL	ADAMTS10	9.53559	17.1346	0.845521	0.99965	NEUTRAL
hsa-miR-23a-5p	107.514	106.916	0.994436	-0.00804886	1	NEUTRAL	ADAMTS10	9.53559	17.1346	0.845521	0.99965	NEUTRAL
hsa-miR-4532	43237.7	8708.8	0.201417	-2.31174	0.000347847	DOWN	ADAMTS10	9.53559	17.1346	0.845521	0.99965	NEUTRAL
hsa-miR-4532	43237.7	8708.8	0.201417	-2.31174	0.000347847	DOWN	ADAMTS10	9.53559	17.1346	0.845521	0.99965	NEUTRAL
hsa-miR-4532	43237.7	8708.8	0.201417	-2.31174	0.000347847	DOWN	ADAMTS10	9.53559	17.1346	0.845521	0.99965	NEUTRAL
hsa-miR-4532	43237.7	8708.8	0.201417	-2.31174	0.000347847	DOWN	ADAMTS10	9.53559	17.1346	0.845521	0.99965	NEUTRAL
hsa-miR-4634	23166.5	3666.96	0.158287	-2.65938	0.000115026	DOWN	ADAMTS10	9.53559	17.1346	0.845521	0.99965	NEUTRAL
hsa-miR-4634	23166.5	3666.96	0.158287	-2.65938	0.000115026	DOWN	ADAMTS10	9.53559	17.1346	0.845521	0.99965	NEUTRAL
hsa-miR-4634	23166.5	3666.96	0.158287	-2.65938	0.000115026	DOWN	ADAMTS10	9.53559	17.1346	0.845521	0.99965	NEUTRAL
hsa-miR-4634	23166.5	3666.96	0.158287	-2.65938	0.000115026	DOWN	ADAMTS10	9.53559	17.1346	0.845521	0.99965	NEUTRAL
hsa-miR-4634	23166.5	3666.96	0.158287	-2.65938	0.000115026	DOWN	ADAMTS10	9.53559	17.1346	0.845521	0.99965	NEUTRAL
hsa-miR-1343-3p	6.79037	11.4869	1.69164	0.758421	0.589942	NEUTRAL	MCM4	4.22412	7.56361	0.840424	0.99965	NEUTRAL
hsa-miR-3180-3p	10.1856	13.2541	1.30126	0.379909	0.813853	NEUTRAL	MCM4	4.22412	7.56361	0.840424	0.99965	NEUTRAL
hsa-miR-3180-3p	10.1856	13.2541	1.30126	0.379909	0.813853	NEUTRAL	MCM4	4.22412	7.56361	0.840424	0.99965	NEUTRAL
hsa-miR-24-3p	1576.5	1563.98	0.992059	-0.0115024	0.988146	NEUTRAL	MCM4	4.22412	7.56361	0.840424	0.99965	NEUTRAL
hsa-miR-423-3p	8683.75	8127.39	0.93593	-0.095527	0.886688	NEUTRAL	MCM4	4.22412	7.56361	0.840424	0.99965	NEUTRAL
hsa-miR-3184-5p	12.449	4.41802	0.354889	-1.49456	0.241819	DOWN	MCM4	4.22412	7.56361	0.840424	0.99965	NEUTRAL
hsa-miR-1285-3p	115.436	132.541	1.14817	0.199337	0.816678	NEUTRAL	RHPN2	0.523937	0.933153	0.832722	0.99965	NEUTRAL
hsa-miR-1285-3p	115.436	132.541	1.14817	0.199337	0.816678	NEUTRAL	RHPN2	0.523937	0.933153	0.832722	0.99965	NEUTRAL
hsa-miR-5699-5p	13.5807	14.1377	1.04101	0.057981	1	NEUTRAL	RHPN2	0.523937	0.933153	0.832722	0.99965	NEUTRAL
hsa-miR-5699-5p	13.5807	14.1377	1.04101	0.057981	1	NEUTRAL	RHPN2	0.523937	0.933153	0.832722	0.99965	NEUTRAL
hsa-miR-5699-5p	13.5807	14.1377	1.04101	0.057981	1	NEUTRAL	RHPN2	0.523937	0.933153	0.832722	0.99965	NEUTRAL
hsa-miR-5699-5p	13.5807	14.1377	1.04101	0.057981	1	NEUTRAL	RHPN2	0.523937	0.933153	0.832722	0.99965	NEUTRAL
hsa-miR-5699-5p	13.5807	14.1377	1.04101	0.057981	1	NEUTRAL	RHPN2	0.523937	0.933153	0.832722	0.99965	NEUTRAL
hsa-miR-3605-5p	16.9759	11.4869	0.676655	-0.563507	0.659781	NEUTRAL	RHPN2	0.523937	0.933153	0.832722	0.99965	NEUTRAL
hsa-miR-3605-5p	16.9759	11.4869	0.676655	-0.563507	0.659781	NEUTRAL	RHPN2	0.523937	0.933153	0.832722	0.99965	NEUTRAL
hsa-miR-3605-5p	16.9759	11.4869	0.676655	-0.563507	0.659781	NEUTRAL	RHPN2	0.523937	0.933153	0.832722	0.99965	NEUTRAL
hsa-miR-132-3p	303.303	334.886	1.10413	0.142908	0.859146	NEUTRAL	PABPC1L	5.74433	10.23	0.832591	0.99965	NEUTRAL
hsa-miR-132-3p	303.303	334.886	1.10413	0.142908	0.859146	NEUTRAL	PABPC1L	5.74433	10.23	0.832591	0.99965	NEUTRAL
hsa-miR-132-3p	303.303	334.886	1.10413	0.142908	0.859146	NEUTRAL	PABPC1L	5.74433	10.23	0.832591	0.99965	NEUTRAL
hsa-miR-132-3p	303.303	334.886	1.10413	0.142908	0.859146	NEUTRAL	PABPC1L	5.74433	10.23	0.832591	0.99965	NEUTRAL
hsa-miR-132-3p	303.303	334.886	1.10413	0.142908	0.859146	NEUTRAL	PABPC1L	5.74433	10.23	0.832591	0.99965	NEUTRAL
hsa-miR-132-3p	303.303	334.886	1.10413	0.142908	0.859146	NEUTRAL	PABPC1L	5.74433	10.23	0.832591	0.99965	NEUTRAL
hsa-miR-132-3p	303.303	334.886	1.10413	0.142908	0.859146	NEUTRAL	PABPC1L	5.74433	10.23	0.832591	0.99965	NEUTRAL
hsa-miR-296-5p	15.8442	13.2541	0.836524	-0.257521	0.879313	NEUTRAL	PABPC1L	5.74433	10.23	0.832591	0.99965	NEUTRAL
hsa-miR-296-5p	15.8442	13.2541	0.836524	-0.257521	0.879313	NEUTRAL	PABPC1L	5.74433	10.23	0.832591	0.99965	NEUTRAL
hsa-miR-296-5p	15.8442	13.2541	0.836524	-0.257521	0.879313	NEUTRAL	PABPC1L	5.74433	10.23	0.832591	0.99965	NEUTRAL
hsa-miR-296-5p	15.8442	13.2541	0.836524	-0.257521	0.879313	NEUTRAL	PABPC1L	5.74433	10.23	0.832591	0.99965	NEUTRAL
hsa-miR-1260b	14.7125	12.3705	0.840814	-0.250141	0.891114	NEUTRAL	CHN1	2.13975	3.79727	0.827521	0.99965	NEUTRAL
hsa-miR-185-5p	36.2153	86.5932	2.39107	1.25765	0.161727	UP	PPFIA4	4.88215	8.66103	0.827021	0.99965	NEUTRAL
hsa-miR-185-5p	36.2153	86.5932	2.39107	1.25765	0.161727	UP	PPFIA4	4.88215	8.66103	0.827021	0.99965	NEUTRAL
hsa-miR-874-5p	14.7125	30.0425	2.04198	1.02997	0.342866	UP	PPFIA4	4.88215	8.66103	0.827021	0.99965	NEUTRAL
hsa-miR-874-5p	14.7125	30.0425	2.04198	1.02997	0.342866	UP	PPFIA4	4.88215	8.66103	0.827021	0.99965	NEUTRAL
hsa-miR-874-5p	14.7125	30.0425	2.04198	1.02997	0.342866	UP	PPFIA4	4.88215	8.66103	0.827021	0.99965	NEUTRAL
hsa-miR-25-5p	19.2394	30.0425	1.56151	0.642944	0.555495	NEUTRAL	PPFIA4	4.88215	8.66103	0.827021	0.99965	NEUTRAL
hsa-miR-25-5p	19.2394	30.0425	1.56151	0.642944	0.555495	NEUTRAL	PPFIA4	4.88215	8.66103	0.827021	0.99965	NEUTRAL
hsa-miR-25-5p	19.2394	30.0425	1.56151	0.642944	0.555495	NEUTRAL	PPFIA4	4.88215	8.66103	0.827021	0.99965	NEUTRAL
hsa-miR-25-5p	19.2394	30.0425	1.56151	0.642944	0.555495	NEUTRAL	PPFIA4	4.88215	8.66103	0.827021	0.99965	NEUTRAL
hsa-miR-25-5p	19.2394	30.0425	1.56151	0.642944	0.555495	NEUTRAL	PPFIA4	4.88215	8.66103	0.827021	0.99965	NEUTRAL
hsa-miR-25-5p	19.2394	30.0425	1.56151	0.642944	0.555495	NEUTRAL	PPFIA4	4.88215	8.66103	0.827021	0.99965	NEUTRAL
hsa-miR-324-3p	18.1077	17.6721	0.975945	-0.0351284	1	NEUTRAL	PPFIA4	4.88215	8.66103	0.827021	0.99965	NEUTRAL
hsa-miR-324-3p	18.1077	17.6721	0.975945	-0.0351284	1	NEUTRAL	PPFIA4	4.88215	8.66103	0.827021	0.99965	NEUTRAL
hsa-miR-324-3p	18.1077	17.6721	0.975945	-0.0351284	1	NEUTRAL	PPFIA4	4.88215	8.66103	0.827021	0.99965	NEUTRAL
hsa-miR-324-3p	18.1077	17.6721	0.975945	-0.0351284	1	NEUTRAL	PPFIA4	4.88215	8.66103	0.827021	0.99965	NEUTRAL
hsa-miR-324-3p	18.1077	17.6721	0.975945	-0.0351284	1	NEUTRAL	PPFIA4	4.88215	8.66103	0.827021	0.99965	NEUTRAL
hsa-miR-370-3p	169.759	161.7	0.952522	-0.0701753	0.937972	NEUTRAL	PPFIA4	4.88215	8.66103	0.827021	0.99965	NEUTRAL
hsa-miR-370-3p	169.759	161.7	0.952522	-0.0701753	0.937972	NEUTRAL	PPFIA4	4.88215	8.66103	0.827021	0.99965	NEUTRAL
hsa-miR-370-3p	169.759	161.7	0.952522	-0.0701753	0.937972	NEUTRAL	PPFIA4	4.88215	8.66103	0.827021	0.99965	NEUTRAL
hsa-miR-4508	174.286	101.614	0.583032	-0.778353	0.340317	NEUTRAL	PPFIA4	4.88215	8.66103	0.827021	0.99965	NEUTRAL
hsa-miR-1285-3p	115.436	132.541	1.14817	0.199337	0.816678	NEUTRAL	ACOT13	1.85665	3.28551	0.823413	0.99965	NEUTRAL
hsa-miR-1285-3p	115.436	132.541	1.14817	0.199337	0.816678	NEUTRAL	ACOT13	1.85665	3.28551	0.823413	0.99965	NEUTRAL
hsa-miR-654-3p	4196.45	93.662	0.0223193	-5.48556	4.46939e-10	DOWN	AGO4	2.18216	3.85779	0.822021	0.99965	NEUTRAL
hsa-miR-1304-5p	2.26346	8.83604	3.90378	1.96487	0.196082	UP	CDCA3	0.644852	1.13806	0.819532	0.99965	NEUTRAL
hsa-miR-1304-5p	2.26346	8.83604	3.90378	1.96487	0.196082	UP	CDCA3	0.644852	1.13806	0.819532	0.99965	NEUTRAL
hsa-miR-3180-3p	10.1856	13.2541	1.30126	0.379909	0.813853	NEUTRAL	CDCA3	0.644852	1.13806	0.819532	0.99965	NEUTRAL
hsa-miR-185-3p	5.65864	12.3705	2.18612	1.12837	0.393641	UP	MYOCD	0.670586	1.18313	0.81912	0.99965	NEUTRAL
hsa-miR-185-3p	5.65864	12.3705	2.18612	1.12837	0.393641	UP	MYOCD	0.670586	1.18313	0.81912	0.99965	NEUTRAL
hsa-miR-210-5p	332.728	350.791	1.05429	0.0762664	0.926502	NEUTRAL	MYOCD	0.670586	1.18313	0.81912	0.99965	NEUTRAL
hsa-miR-210-5p	332.728	350.791	1.05429	0.0762664	0.926502	NEUTRAL	MYOCD	0.670586	1.18313	0.81912	0.99965	NEUTRAL
hsa-miR-210-5p	332.728	350.791	1.05429	0.0762664	0.926502	NEUTRAL	MYOCD	0.670586	1.18313	0.81912	0.99965	NEUTRAL
hsa-miR-874-5p	14.7125	30.0425	2.04198	1.02997	0.342866	UP	EXTL1	3.87184	6.82541	0.817895	0.99965	NEUTRAL
hsa-miR-874-5p	14.7125	30.0425	2.04198	1.02997	0.342866	UP	EXTL1	3.87184	6.82541	0.817895	0.99965	NEUTRAL
hsa-miR-874-5p	14.7125	30.0425	2.04198	1.02997	0.342866	UP	EXTL1	3.87184	6.82541	0.817895	0.99965	NEUTRAL
hsa-miR-665	33.9519	32.6933	0.962932	-0.0544937	0.990546	NEUTRAL	EXTL1	3.87184	6.82541	0.817895	0.99965	NEUTRAL
hsa-miR-423-5p	3397.45	1667.36	0.490768	-1.02689	0.1584	DOWN	EXTL1	3.87184	6.82541	0.817895	0.99965	NEUTRAL
hsa-miR-1285-3p	115.436	132.541	1.14817	0.199337	0.816678	NEUTRAL	MDM4	2.55701	4.50649	0.817544	0.99965	NEUTRAL
hsa-miR-1285-3p	115.436	132.541	1.14817	0.199337	0.816678	NEUTRAL	MDM4	2.55701	4.50649	0.817544	0.99965	NEUTRAL
hsa-miR-1285-3p	115.436	132.541	1.14817	0.199337	0.816678	NEUTRAL	MDM4	2.55701	4.50649	0.817544	0.99965	NEUTRAL
hsa-miR-1285-3p	115.436	132.541	1.14817	0.199337	0.816678	NEUTRAL	MDM4	2.55701	4.50649	0.817544	0.99965	NEUTRAL
hsa-miR-1285-3p	115.436	132.541	1.14817	0.199337	0.816678	NEUTRAL	MDM4	2.55701	4.50649	0.817544	0.99965	NEUTRAL
hsa-miR-1285-3p	115.436	132.541	1.14817	0.199337	0.816678	NEUTRAL	MDM4	2.55701	4.50649	0.817544	0.99965	NEUTRAL
hsa-miR-1285-3p	115.436	132.541	1.14817	0.199337	0.816678	NEUTRAL	MDM4	2.55701	4.50649	0.817544	0.99965	NEUTRAL
hsa-miR-1285-3p	115.436	132.541	1.14817	0.199337	0.816678	NEUTRAL	MDM4	2.55701	4.50649	0.817544	0.99965	NEUTRAL
hsa-miR-1285-3p	115.436	132.541	1.14817	0.199337	0.816678	NEUTRAL	MDM4	2.55701	4.50649	0.817544	0.99965	NEUTRAL
hsa-miR-92a-3p	25752.5	22368.4	0.868593	-0.203248	0.743495	NEUTRAL	MDM4	2.55701	4.50649	0.817544	0.99965	NEUTRAL
hsa-miR-92a-3p	25752.5	22368.4	0.868593	-0.203248	0.743495	NEUTRAL	MDM4	2.55701	4.50649	0.817544	0.99965	NEUTRAL
hsa-miR-92a-3p	25752.5	22368.4	0.868593	-0.203248	0.743495	NEUTRAL	MDM4	2.55701	4.50649	0.817544	0.99965	NEUTRAL
hsa-miR-92a-3p	25752.5	22368.4	0.868593	-0.203248	0.743495	NEUTRAL	MDM4	2.55701	4.50649	0.817544	0.99965	NEUTRAL
hsa-miR-92a-3p	25752.5	22368.4	0.868593	-0.203248	0.743495	NEUTRAL	MDM4	2.55701	4.50649	0.817544	0.99965	NEUTRAL
hsa-miR-92a-3p	25752.5	22368.4	0.868593	-0.203248	0.743495	NEUTRAL	MDM4	2.55701	4.50649	0.817544	0.99965	NEUTRAL
hsa-miR-92a-3p	25752.5	22368.4	0.868593	-0.203248	0.743495	NEUTRAL	MDM4	2.55701	4.50649	0.817544	0.99965	NEUTRAL
hsa-miR-92a-3p	25752.5	22368.4	0.868593	-0.203248	0.743495	NEUTRAL	MDM4	2.55701	4.50649	0.817544	0.99965	NEUTRAL
hsa-miR-431-3p	66.772	68.9211	1.03219	0.0457027	0.97798	NEUTRAL	KRT8P46	0.381236	0.670929	0.815477	0.99965	NEUTRAL
hsa-miR-324-3p	18.1077	17.6721	0.975945	-0.0351284	1	NEUTRAL	KRT8P46	0.381236	0.670929	0.815477	0.99965	NEUTRAL
hsa-miR-3180-3p	10.1856	13.2541	1.30126	0.379909	0.813853	NEUTRAL	GNRHR2	0.396735	0.694116	0.807003	0.99965	NEUTRAL
hsa-miR-3180-3p	10.1856	13.2541	1.30126	0.379909	0.813853	NEUTRAL	GNRHR2	0.396735	0.694116	0.807003	0.99965	NEUTRAL
hsa-miR-1301-3p	18.1077	25.6245	1.41512	0.500925	0.665757	NEUTRAL	DDX11L2	0.283563	0.493956	0.800711	0.99965	NEUTRAL
hsa-miR-5787	12.449	3068.76	246.506	7.94548	1.13133e-14	UP	ST8SIA1	0.226443	0.39439	0.800472	0.99965	NEUTRAL
hsa-miR-3180-3p	10.1856	13.2541	1.30126	0.379909	0.813853	NEUTRAL	ST8SIA1	0.226443	0.39439	0.800472	0.99965	NEUTRAL
hsa-miR-3180-3p	10.1856	13.2541	1.30126	0.379909	0.813853	NEUTRAL	ST8SIA1	0.226443	0.39439	0.800472	0.99965	NEUTRAL
hsa-miR-3180-3p	10.1856	13.2541	1.30126	0.379909	0.813853	NEUTRAL	ST8SIA1	0.226443	0.39439	0.800472	0.99965	NEUTRAL
hsa-miR-3180-3p	10.1856	13.2541	1.30126	0.379909	0.813853	NEUTRAL	ST8SIA1	0.226443	0.39439	0.800472	0.99965	NEUTRAL
hsa-miR-146b-3p	18.1077	3.53442	0.195189	-2.35706	0.0605725	DOWN	ST8SIA1	0.226443	0.39439	0.800472	0.99965	NEUTRAL
hsa-miR-140-3p	2351.73	11396.7	4.8461	2.27682	0.0013695	UP	RP11-423H2.1,RP11-423H2.3	2.04611	3.55857	0.798415	0.99965	NEUTRAL
hsa-miR-149-5p	404.027	333.119	0.824496	-0.278416	0.722644	NEUTRAL	RP11-423H2.1,RP11-423H2.3	2.04611	3.55857	0.798415	0.99965	NEUTRAL
hsa-miR-1228-3p	5.65864	8.83604	1.56151	0.642944	0.697161	NEUTRAL	PAPPA2	0.747329	1.29892	0.797496	0.99965	NEUTRAL
hsa-miR-3677-3p	6.79037	9.71964	1.43139	0.517413	0.759969	NEUTRAL	PAPPA2	0.747329	1.29892	0.797496	0.99965	NEUTRAL
hsa-miR-3677-3p	6.79037	9.71964	1.43139	0.517413	0.759969	NEUTRAL	PAPPA2	0.747329	1.29892	0.797496	0.99965	NEUTRAL
hsa-miR-665	33.9519	32.6933	0.962932	-0.0544937	0.990546	NEUTRAL	PAPPA2	0.747329	1.29892	0.797496	0.99965	NEUTRAL
hsa-miR-665	33.9519	32.6933	0.962932	-0.0544937	0.990546	NEUTRAL	PAPPA2	0.747329	1.29892	0.797496	0.99965	NEUTRAL
hsa-miR-6511b-3p	15.8442	8.83604	0.557683	-0.842483	0.497404	NEUTRAL	PAPPA2	0.747329	1.29892	0.797496	0.99965	NEUTRAL
hsa-miR-766-3p	12.449	16.7885	1.34858	0.431439	0.754984	NEUTRAL	MORN1	0.492989	0.85683	0.797454	0.99965	NEUTRAL
hsa-miR-589-5p	252.376	299.542	1.18689	0.247185	0.756989	NEUTRAL	MORN1	0.492989	0.85683	0.797454	0.99965	NEUTRAL
hsa-miR-4326	21.5028	23.8573	1.1095	0.149903	0.932342	NEUTRAL	MORN1	0.492989	0.85683	0.797454	0.99965	NEUTRAL
hsa-miR-210-3p	2899.49	2969.79	1.02425	0.0345636	0.96243	NEUTRAL	MORN1	0.492989	0.85683	0.797454	0.99965	NEUTRAL
hsa-miR-210-3p	2899.49	2969.79	1.02425	0.0345636	0.96243	NEUTRAL	MORN1	0.492989	0.85683	0.797454	0.99965	NEUTRAL
hsa-miR-744-5p	823.899	698.931	0.848321	-0.237317	0.756018	NEUTRAL	MORN1	0.492989	0.85683	0.797454	0.99965	NEUTRAL
hsa-miR-744-5p	823.899	698.931	0.848321	-0.237317	0.756018	NEUTRAL	MORN1	0.492989	0.85683	0.797454	0.99965	NEUTRAL
hsa-miR-744-5p	823.899	698.931	0.848321	-0.237317	0.756018	NEUTRAL	MORN1	0.492989	0.85683	0.797454	0.99965	NEUTRAL
hsa-miR-296-5p	15.8442	13.2541	0.836524	-0.257521	0.879313	NEUTRAL	MORN1	0.492989	0.85683	0.797454	0.99965	NEUTRAL
hsa-miR-2277-5p	35.0836	47.7146	1.36003	0.443635	0.654588	NEUTRAL	ZDHHC17	11.4444	19.8489	0.79441	0.99965	NEUTRAL
hsa-miR-2277-5p	35.0836	47.7146	1.36003	0.443635	0.654588	NEUTRAL	ZDHHC17	11.4444	19.8489	0.79441	0.99965	NEUTRAL
hsa-miR-1285-3p	115.436	132.541	1.14817	0.199337	0.816678	NEUTRAL	ZDHHC17	11.4444	19.8489	0.79441	0.99965	NEUTRAL
hsa-miR-30c-2-3p	108.646	103.382	0.951546	-0.0716543	0.942994	NEUTRAL	ZDHHC17	11.4444	19.8489	0.79441	0.99965	NEUTRAL
hsa-miR-30c-2-3p	108.646	103.382	0.951546	-0.0716543	0.942994	NEUTRAL	ZDHHC17	11.4444	19.8489	0.79441	0.99965	NEUTRAL
hsa-miR-30b-3p	18.1077	14.1377	0.780756	-0.357056	0.795423	NEUTRAL	ZDHHC17	11.4444	19.8489	0.79441	0.99965	NEUTRAL
hsa-miR-30b-3p	18.1077	14.1377	0.780756	-0.357056	0.795423	NEUTRAL	ZDHHC17	11.4444	19.8489	0.79441	0.99965	NEUTRAL
hsa-miR-10a-5p	89140.6	113518	1.27348	0.348771	0.50746	NEUTRAL	ABCA8	0.494909	0.857591	0.793126	0.99965	NEUTRAL
hsa-miR-370-3p	169.759	161.7	0.952522	-0.0701753	0.937972	NEUTRAL	ABCA8	0.494909	0.857591	0.793126	0.99965	NEUTRAL
hsa-miR-3176	13.5807	32.6933	2.40733	1.26743	0.238661	UP	PTPRH	0.248268	0.429531	0.790865	0.99965	NEUTRAL
hsa-miR-3176	13.5807	32.6933	2.40733	1.26743	0.238661	UP	PTPRH	0.248268	0.429531	0.790865	0.99965	NEUTRAL
hsa-miR-3176	13.5807	32.6933	2.40733	1.26743	0.238661	UP	PTPRH	0.248268	0.429531	0.790865	0.99965	NEUTRAL
hsa-miR-708-5p	405.159	493.051	1.21693	0.283249	0.716916	NEUTRAL	CLUHP3	0.224566	0.387933	0.788669	0.99965	NEUTRAL
hsa-miR-708-5p	405.159	493.051	1.21693	0.283249	0.716916	NEUTRAL	CLUHP3	0.224566	0.387933	0.788669	0.99965	NEUTRAL
hsa-miR-708-5p	405.159	493.051	1.21693	0.283249	0.716916	NEUTRAL	CLUHP3	0.224566	0.387933	0.788669	0.99965	NEUTRAL
hsa-miR-708-5p	405.159	493.051	1.21693	0.283249	0.716916	NEUTRAL	CLUHP3	0.224566	0.387933	0.788669	0.99965	NEUTRAL
hsa-miR-708-5p	405.159	493.051	1.21693	0.283249	0.716916	NEUTRAL	CLUHP3	0.224566	0.387933	0.788669	0.99965	NEUTRAL
hsa-miR-4326	21.5028	23.8573	1.1095	0.149903	0.932342	NEUTRAL	CLUHP3	0.224566	0.387933	0.788669	0.99965	NEUTRAL
hsa-miR-214-3p	1156.63	1241.46	1.07335	0.102118	0.892839	NEUTRAL	CLUHP3	0.224566	0.387933	0.788669	0.99965	NEUTRAL
hsa-miR-5787	12.449	3068.76	246.506	7.94548	1.13133e-14	UP	FBXL16	0.282616	0.487561	0.786737	0.99965	NEUTRAL
hsa-miR-1343-3p	6.79037	11.4869	1.69164	0.758421	0.589942	NEUTRAL	FBXL16	0.282616	0.487561	0.786737	0.99965	NEUTRAL
hsa-miR-1343-3p	6.79037	11.4869	1.69164	0.758421	0.589942	NEUTRAL	FBXL16	0.282616	0.487561	0.786737	0.99965	NEUTRAL
hsa-miR-1343-3p	6.79037	11.4869	1.69164	0.758421	0.589942	NEUTRAL	FBXL16	0.282616	0.487561	0.786737	0.99965	NEUTRAL
hsa-miR-3180-3p	10.1856	13.2541	1.30126	0.379909	0.813853	NEUTRAL	FBXL16	0.282616	0.487561	0.786737	0.99965	NEUTRAL
hsa-miR-3180-3p	10.1856	13.2541	1.30126	0.379909	0.813853	NEUTRAL	FBXL16	0.282616	0.487561	0.786737	0.99965	NEUTRAL
hsa-miR-3180-3p	10.1856	13.2541	1.30126	0.379909	0.813853	NEUTRAL	FBXL16	0.282616	0.487561	0.786737	0.99965	NEUTRAL
hsa-miR-3180-3p	10.1856	13.2541	1.30126	0.379909	0.813853	NEUTRAL	FBXL16	0.282616	0.487561	0.786737	0.99965	NEUTRAL
hsa-miR-5787	12.449	3068.76	246.506	7.94548	1.13133e-14	UP	ZSCAN5A	0.640997	1.10543	0.786215	0.99965	NEUTRAL
hsa-miR-140-3p	2351.73	11396.7	4.8461	2.27682	0.0013695	UP	CLCN2	1.26287	2.17781	0.786175	0.99965	NEUTRAL
hsa-miR-140-3p	2351.73	11396.7	4.8461	2.27682	0.0013695	UP	CLCN2	1.26287	2.17781	0.786175	0.99965	NEUTRAL
hsa-miR-140-3p	2351.73	11396.7	4.8461	2.27682	0.0013695	UP	CLCN2	1.26287	2.17781	0.786175	0.99965	NEUTRAL
hsa-miR-140-3p	2351.73	11396.7	4.8461	2.27682	0.0013695	UP	CLCN2	1.26287	2.17781	0.786175	0.99965	NEUTRAL
hsa-miR-140-3p	2351.73	11396.7	4.8461	2.27682	0.0013695	UP	CLCN2	1.26287	2.17781	0.786175	0.99965	NEUTRAL
hsa-miR-615-3p	221.819	531.046	2.39405	1.25945	0.110381	UP	EMC3-AS1	0.387605	0.666614	0.782266	0.99965	NEUTRAL
hsa-miR-615-3p	221.819	531.046	2.39405	1.25945	0.110381	UP	EMC3-AS1	0.387605	0.666614	0.782266	0.99965	NEUTRAL
hsa-miR-1343-3p	6.79037	11.4869	1.69164	0.758421	0.589942	NEUTRAL	EMC3-AS1	0.387605	0.666614	0.782266	0.99965	NEUTRAL
hsa-miR-1343-3p	6.79037	11.4869	1.69164	0.758421	0.589942	NEUTRAL	EMC3-AS1	0.387605	0.666614	0.782266	0.99965	NEUTRAL
hsa-miR-370-3p	169.759	161.7	0.952522	-0.0701753	0.937972	NEUTRAL	EMC3-AS1	0.387605	0.666614	0.782266	0.99965	NEUTRAL
hsa-miR-3960	12.449	0.883604	0.0709778	-3.81649	0.016522	DOWN	DLX5	1.89367	3.2552	0.781561	0.99965	NEUTRAL
hsa-miR-3960	12.449	0.883604	0.0709778	-3.81649	0.016522	DOWN	DLX5	1.89367	3.2552	0.781561	0.99965	NEUTRAL
hsa-miR-3960	12.449	0.883604	0.0709778	-3.81649	0.016522	DOWN	DLX5	1.89367	3.2552	0.781561	0.99965	NEUTRAL
hsa-miR-34c-5p	1195.11	1127.48	0.943413	-0.084038	0.91133	NEUTRAL	PRKCE	1.60354	2.75507	0.780828	0.99965	NEUTRAL
hsa-miR-6511b-3p	15.8442	8.83604	0.557683	-0.842483	0.497404	NEUTRAL	PRKCE	1.60354	2.75507	0.780828	0.99965	NEUTRAL
hsa-miR-1301-3p	18.1077	25.6245	1.41512	0.500925	0.665757	NEUTRAL	TLE2	1.69758	2.91616	0.780587	0.99965	NEUTRAL
hsa-miR-1301-3p	18.1077	25.6245	1.41512	0.500925	0.665757	NEUTRAL	TLE2	1.69758	2.91616	0.780587	0.99965	NEUTRAL
hsa-miR-1301-3p	18.1077	25.6245	1.41512	0.500925	0.665757	NEUTRAL	TLE2	1.69758	2.91616	0.780587	0.99965	NEUTRAL
hsa-miR-1301-3p	18.1077	25.6245	1.41512	0.500925	0.665757	NEUTRAL	TLE2	1.69758	2.91616	0.780587	0.99965	NEUTRAL
hsa-miR-1301-3p	18.1077	25.6245	1.41512	0.500925	0.665757	NEUTRAL	TLE2	1.69758	2.91616	0.780587	0.99965	NEUTRAL
hsa-miR-1301-3p	18.1077	25.6245	1.41512	0.500925	0.665757	NEUTRAL	TLE2	1.69758	2.91616	0.780587	0.99965	NEUTRAL
hsa-miR-1301-3p	18.1077	25.6245	1.41512	0.500925	0.665757	NEUTRAL	TLE2	1.69758	2.91616	0.780587	0.99965	NEUTRAL
hsa-miR-1301-3p	18.1077	25.6245	1.41512	0.500925	0.665757	NEUTRAL	TLE2	1.69758	2.91616	0.780587	0.99965	NEUTRAL
hsa-miR-1285-3p	115.436	132.541	1.14817	0.199337	0.816678	NEUTRAL	MACC1	0.386109	0.663141	0.780309	0.99965	NEUTRAL
hsa-miR-4516	14.7125	26.5081	1.80174	0.849394	0.44668	NEUTRAL	ARHGAP26	2.60759	4.47741	0.779948	0.99965	NEUTRAL
hsa-miR-4516	14.7125	26.5081	1.80174	0.849394	0.44668	NEUTRAL	ARHGAP26	2.60759	4.47741	0.779948	0.99965	NEUTRAL
hsa-miR-4516	14.7125	26.5081	1.80174	0.849394	0.44668	NEUTRAL	ARHGAP26	2.60759	4.47741	0.779948	0.99965	NEUTRAL
hsa-miR-330-5p	63.3768	63.6195	1.00383	0.00551359	1	NEUTRAL	ARHGAP26	2.60759	4.47741	0.779948	0.99965	NEUTRAL
hsa-miR-3615	79.221	71.5719	0.903446	-0.14649	0.879307	NEUTRAL	ARHGAP26	2.60759	4.47741	0.779948	0.99965	NEUTRAL
hsa-miR-3615	79.221	71.5719	0.903446	-0.14649	0.879307	NEUTRAL	ARHGAP26	2.60759	4.47741	0.779948	0.99965	NEUTRAL
hsa-miR-339-5p	38.4788	199.694	5.18973	2.37566	0.00610349	UP	C3	2.84846	4.88025	0.776775	0.99965	NEUTRAL
hsa-miR-770-5p	10.1856	20.3229	1.99527	0.99658	0.401906	NEUTRAL	C3	2.84846	4.88025	0.776775	0.99965	NEUTRAL
hsa-miR-2467-5p	10.1856	10.6032	1.04101	0.057981	1	NEUTRAL	C3	2.84846	4.88025	0.776775	0.99965	NEUTRAL
hsa-miR-1268b	70.1672	68.9211	0.982241	-0.0258506	0.995133	NEUTRAL	C3	2.84846	4.88025	0.776775	0.99965	NEUTRAL
hsa-miR-324-3p	18.1077	17.6721	0.975945	-0.0351284	1	NEUTRAL	C3	2.84846	4.88025	0.776775	0.99965	NEUTRAL
hsa-miR-1304-5p	2.26346	8.83604	3.90378	1.96487	0.196082	UP	TFAP4	1.12468	1.92362	0.774303	0.99965	NEUTRAL
hsa-miR-125a-3p	102.987	122.821	1.19258	0.25409	0.767038	NEUTRAL	TFAP4	1.12468	1.92362	0.774303	0.99965	NEUTRAL
hsa-miR-7706	53.1913	61.8523	1.16283	0.217638	0.825481	NEUTRAL	TFAP4	1.12468	1.92362	0.774303	0.99965	NEUTRAL
hsa-miR-1285-3p	115.436	132.541	1.14817	0.199337	0.816678	NEUTRAL	TFAP4	1.12468	1.92362	0.774303	0.99965	NEUTRAL
hsa-miR-23a-5p	107.514	106.916	0.994436	-0.00804886	1	NEUTRAL	TFAP4	1.12468	1.92362	0.774303	0.99965	NEUTRAL
hsa-miR-1268b	70.1672	68.9211	0.982241	-0.0258506	0.995133	NEUTRAL	TFAP4	1.12468	1.92362	0.774303	0.99965	NEUTRAL
hsa-miR-665	33.9519	32.6933	0.962932	-0.0544937	0.990546	NEUTRAL	TFAP4	1.12468	1.92362	0.774303	0.99965	NEUTRAL
hsa-miR-331-3p	379.129	285.404	0.752789	-0.409683	0.601587	NEUTRAL	TFAP4	1.12468	1.92362	0.774303	0.99965	NEUTRAL
hsa-miR-3605-3p	28.2932	18.5557	0.655835	-0.608595	0.579037	NEUTRAL	TFAP4	1.12468	1.92362	0.774303	0.99965	NEUTRAL
hsa-miR-3605-3p	28.2932	18.5557	0.655835	-0.608595	0.579037	NEUTRAL	TFAP4	1.12468	1.92362	0.774303	0.99965	NEUTRAL
hsa-miR-3605-3p	28.2932	18.5557	0.655835	-0.608595	0.579037	NEUTRAL	TFAP4	1.12468	1.92362	0.774303	0.99965	NEUTRAL
hsa-miR-3960	12.449	0.883604	0.0709778	-3.81649	0.016522	DOWN	TFAP4	1.12468	1.92362	0.774303	0.99965	NEUTRAL
hsa-miR-3960	12.449	0.883604	0.0709778	-3.81649	0.016522	DOWN	TFAP4	1.12468	1.92362	0.774303	0.99965	NEUTRAL
hsa-miR-431-3p	66.772	68.9211	1.03219	0.0457027	0.97798	NEUTRAL	SLC26A1	0.434324	0.742829	0.774258	0.99965	NEUTRAL
hsa-miR-431-3p	66.772	68.9211	1.03219	0.0457027	0.97798	NEUTRAL	SLC26A1	0.434324	0.742829	0.774258	0.99965	NEUTRAL
hsa-miR-324-3p	18.1077	17.6721	0.975945	-0.0351284	1	NEUTRAL	SLC26A1	0.434324	0.742829	0.774258	0.99965	NEUTRAL
hsa-miR-4466	12.449	7.06883	0.567822	-0.816488	0.536058	NEUTRAL	SLC26A1	0.434324	0.742829	0.774258	0.99965	NEUTRAL
hsa-miR-4466	12.449	7.06883	0.567822	-0.816488	0.536058	NEUTRAL	SLC26A1	0.434324	0.742829	0.774258	0.99965	NEUTRAL
hsa-miR-1304-5p	2.26346	8.83604	3.90378	1.96487	0.196082	UP	CSAD	3.87854	6.62469	0.772339	0.99965	NEUTRAL
hsa-miR-1304-5p	2.26346	8.83604	3.90378	1.96487	0.196082	UP	CSAD	3.87854	6.62469	0.772339	0.99965	NEUTRAL
hsa-miR-1304-5p	2.26346	8.83604	3.90378	1.96487	0.196082	UP	CSAD	3.87854	6.62469	0.772339	0.99965	NEUTRAL
hsa-miR-1304-5p	2.26346	8.83604	3.90378	1.96487	0.196082	UP	CSAD	3.87854	6.62469	0.772339	0.99965	NEUTRAL
hsa-miR-1304-5p	2.26346	8.83604	3.90378	1.96487	0.196082	UP	CSAD	3.87854	6.62469	0.772339	0.99965	NEUTRAL
hsa-miR-1304-5p	2.26346	8.83604	3.90378	1.96487	0.196082	UP	CSAD	3.87854	6.62469	0.772339	0.99965	NEUTRAL
hsa-miR-1304-5p	2.26346	8.83604	3.90378	1.96487	0.196082	UP	CSAD	3.87854	6.62469	0.772339	0.99965	NEUTRAL
hsa-miR-1304-5p	2.26346	8.83604	3.90378	1.96487	0.196082	UP	CSAD	3.87854	6.62469	0.772339	0.99965	NEUTRAL
hsa-miR-1304-5p	2.26346	8.83604	3.90378	1.96487	0.196082	UP	CSAD	3.87854	6.62469	0.772339	0.99965	NEUTRAL
hsa-miR-1304-5p	2.26346	8.83604	3.90378	1.96487	0.196082	UP	CSAD	3.87854	6.62469	0.772339	0.99965	NEUTRAL
hsa-miR-1304-5p	2.26346	8.83604	3.90378	1.96487	0.196082	UP	CSAD	3.87854	6.62469	0.772339	0.99965	NEUTRAL
hsa-miR-3180-3p	10.1856	13.2541	1.30126	0.379909	0.813853	NEUTRAL	CSAD	3.87854	6.62469	0.772339	0.99965	NEUTRAL
hsa-miR-3180-3p	10.1856	13.2541	1.30126	0.379909	0.813853	NEUTRAL	CSAD	3.87854	6.62469	0.772339	0.99965	NEUTRAL
hsa-miR-3180-3p	10.1856	13.2541	1.30126	0.379909	0.813853	NEUTRAL	CSAD	3.87854	6.62469	0.772339	0.99965	NEUTRAL
hsa-miR-3180-3p	10.1856	13.2541	1.30126	0.379909	0.813853	NEUTRAL	CSAD	3.87854	6.62469	0.772339	0.99965	NEUTRAL
hsa-miR-3180-3p	10.1856	13.2541	1.30126	0.379909	0.813853	NEUTRAL	CSAD	3.87854	6.62469	0.772339	0.99965	NEUTRAL
hsa-miR-3180-3p	10.1856	13.2541	1.30126	0.379909	0.813853	NEUTRAL	CSAD	3.87854	6.62469	0.772339	0.99965	NEUTRAL
hsa-miR-3180-3p	10.1856	13.2541	1.30126	0.379909	0.813853	NEUTRAL	CSAD	3.87854	6.62469	0.772339	0.99965	NEUTRAL
hsa-miR-3180-3p	10.1856	13.2541	1.30126	0.379909	0.813853	NEUTRAL	CSAD	3.87854	6.62469	0.772339	0.99965	NEUTRAL
hsa-miR-1285-3p	115.436	132.541	1.14817	0.199337	0.816678	NEUTRAL	RP11-867G23.8	0.457945	0.781443	0.770965	0.99965	NEUTRAL
hsa-miR-3176	13.5807	32.6933	2.40733	1.26743	0.238661	UP	LRFN1	0.307397	0.524475	0.770769	0.99965	NEUTRAL
hsa-miR-4516	14.7125	26.5081	1.80174	0.849394	0.44668	NEUTRAL	LRFN1	0.307397	0.524475	0.770769	0.99965	NEUTRAL
hsa-miR-5787	12.449	3068.76	246.506	7.94548	1.13133e-14	UP	SHANK2	0.689786	1.17637	0.770115	0.99965	NEUTRAL
hsa-miR-5787	12.449	3068.76	246.506	7.94548	1.13133e-14	UP	SHANK2	0.689786	1.17637	0.770115	0.99965	NEUTRAL
hsa-miR-5787	12.449	3068.76	246.506	7.94548	1.13133e-14	UP	SHANK2	0.689786	1.17637	0.770115	0.99965	NEUTRAL
hsa-miR-5787	12.449	3068.76	246.506	7.94548	1.13133e-14	UP	SHANK2	0.689786	1.17637	0.770115	0.99965	NEUTRAL
hsa-miR-5787	12.449	3068.76	246.506	7.94548	1.13133e-14	UP	SHANK2	0.689786	1.17637	0.770115	0.99965	NEUTRAL
hsa-miR-5787	12.449	3068.76	246.506	7.94548	1.13133e-14	UP	SHANK2	0.689786	1.17637	0.770115	0.99965	NEUTRAL
hsa-miR-5787	12.449	3068.76	246.506	7.94548	1.13133e-14	UP	SHANK2	0.689786	1.17637	0.770115	0.99965	NEUTRAL
hsa-miR-365a-5p	4.52692	14.1377	3.12302	1.64294	0.204398	UP	SHANK2	0.689786	1.17637	0.770115	0.99965	NEUTRAL
hsa-miR-365a-5p	4.52692	14.1377	3.12302	1.64294	0.204398	UP	SHANK2	0.689786	1.17637	0.770115	0.99965	NEUTRAL
hsa-miR-365a-5p	4.52692	14.1377	3.12302	1.64294	0.204398	UP	SHANK2	0.689786	1.17637	0.770115	0.99965	NEUTRAL
hsa-miR-365a-5p	4.52692	14.1377	3.12302	1.64294	0.204398	UP	SHANK2	0.689786	1.17637	0.770115	0.99965	NEUTRAL
hsa-miR-365a-5p	4.52692	14.1377	3.12302	1.64294	0.204398	UP	SHANK2	0.689786	1.17637	0.770115	0.99965	NEUTRAL
hsa-miR-365a-5p	4.52692	14.1377	3.12302	1.64294	0.204398	UP	SHANK2	0.689786	1.17637	0.770115	0.99965	NEUTRAL
hsa-miR-766-3p	12.449	16.7885	1.34858	0.431439	0.754984	NEUTRAL	SHANK2	0.689786	1.17637	0.770115	0.99965	NEUTRAL
hsa-miR-365b-5p	18.1077	22.0901	1.21993	0.2868	0.833175	NEUTRAL	SHANK2	0.689786	1.17637	0.770115	0.99965	NEUTRAL
hsa-miR-365b-5p	18.1077	22.0901	1.21993	0.2868	0.833175	NEUTRAL	SHANK2	0.689786	1.17637	0.770115	0.99965	NEUTRAL
hsa-miR-365b-5p	18.1077	22.0901	1.21993	0.2868	0.833175	NEUTRAL	SHANK2	0.689786	1.17637	0.770115	0.99965	NEUTRAL
hsa-miR-365b-5p	18.1077	22.0901	1.21993	0.2868	0.833175	NEUTRAL	SHANK2	0.689786	1.17637	0.770115	0.99965	NEUTRAL
hsa-miR-365b-5p	18.1077	22.0901	1.21993	0.2868	0.833175	NEUTRAL	SHANK2	0.689786	1.17637	0.770115	0.99965	NEUTRAL
hsa-miR-365b-5p	18.1077	22.0901	1.21993	0.2868	0.833175	NEUTRAL	SHANK2	0.689786	1.17637	0.770115	0.99965	NEUTRAL
hsa-miR-431-3p	66.772	68.9211	1.03219	0.0457027	0.97798	NEUTRAL	SHANK2	0.689786	1.17637	0.770115	0.99965	NEUTRAL
hsa-miR-330-5p	63.3768	63.6195	1.00383	0.00551359	1	NEUTRAL	SHANK2	0.689786	1.17637	0.770115	0.99965	NEUTRAL
hsa-miR-330-5p	63.3768	63.6195	1.00383	0.00551359	1	NEUTRAL	SHANK2	0.689786	1.17637	0.770115	0.99965	NEUTRAL
hsa-miR-330-5p	63.3768	63.6195	1.00383	0.00551359	1	NEUTRAL	SHANK2	0.689786	1.17637	0.770115	0.99965	NEUTRAL
hsa-miR-370-3p	169.759	161.7	0.952522	-0.0701753	0.937972	NEUTRAL	SHANK2	0.689786	1.17637	0.770115	0.99965	NEUTRAL
hsa-miR-370-3p	169.759	161.7	0.952522	-0.0701753	0.937972	NEUTRAL	SHANK2	0.689786	1.17637	0.770115	0.99965	NEUTRAL
hsa-miR-370-3p	169.759	161.7	0.952522	-0.0701753	0.937972	NEUTRAL	SHANK2	0.689786	1.17637	0.770115	0.99965	NEUTRAL
hsa-miR-370-3p	169.759	161.7	0.952522	-0.0701753	0.937972	NEUTRAL	SHANK2	0.689786	1.17637	0.770115	0.99965	NEUTRAL
hsa-miR-1260b	14.7125	12.3705	0.840814	-0.250141	0.891114	NEUTRAL	SHANK2	0.689786	1.17637	0.770115	0.99965	NEUTRAL
hsa-miR-671-5p	56.5864	116.636	2.0612	1.04348	0.222883	UP	GDPGP1	0.423518	0.72131	0.768197	0.99965	NEUTRAL
hsa-miR-671-5p	56.5864	116.636	2.0612	1.04348	0.222883	UP	GDPGP1	0.423518	0.72131	0.768197	0.99965	NEUTRAL
hsa-miR-3180-3p	10.1856	13.2541	1.30126	0.379909	0.813853	NEUTRAL	GDPGP1	0.423518	0.72131	0.768197	0.99965	NEUTRAL
hsa-miR-1285-3p	115.436	132.541	1.14817	0.199337	0.816678	NEUTRAL	GDPGP1	0.423518	0.72131	0.768197	0.99965	NEUTRAL
hsa-miR-1285-3p	115.436	132.541	1.14817	0.199337	0.816678	NEUTRAL	GDPGP1	0.423518	0.72131	0.768197	0.99965	NEUTRAL
hsa-miR-1285-3p	115.436	132.541	1.14817	0.199337	0.816678	NEUTRAL	GDPGP1	0.423518	0.72131	0.768197	0.99965	NEUTRAL
hsa-miR-324-3p	18.1077	17.6721	0.975945	-0.0351284	1	NEUTRAL	CDKN2B	12.2421	20.8446	0.767828	0.99965	NEUTRAL
hsa-miR-4466	12.449	7.06883	0.567822	-0.816488	0.536058	NEUTRAL	CDKN2B	12.2421	20.8446	0.767828	0.99965	NEUTRAL
hsa-miR-4466	12.449	7.06883	0.567822	-0.816488	0.536058	NEUTRAL	CDKN2B	12.2421	20.8446	0.767828	0.99965	NEUTRAL
hsa-miR-339-5p	38.4788	199.694	5.18973	2.37566	0.00610349	UP	HMCN1	14.1491	24.0769	0.766941	0.99965	NEUTRAL
hsa-miR-766-3p	12.449	16.7885	1.34858	0.431439	0.754984	NEUTRAL	HMCN1	14.1491	24.0769	0.766941	0.99965	NEUTRAL
hsa-miR-3065-3p	15.8442	15.9049	1.00383	0.00551359	1	NEUTRAL	HMCN1	14.1491	24.0769	0.766941	0.99965	NEUTRAL
hsa-miR-324-3p	18.1077	17.6721	0.975945	-0.0351284	1	NEUTRAL	HMCN1	14.1491	24.0769	0.766941	0.99965	NEUTRAL
hsa-miR-182-5p	88.2748	59.2015	0.670649	-0.57637	0.509581	NEUTRAL	HMCN1	14.1491	24.0769	0.766941	0.99965	NEUTRAL
hsa-miR-365b-5p	18.1077	22.0901	1.21993	0.2868	0.833175	NEUTRAL	MKS1	3.58766	6.09266	0.764029	0.99965	NEUTRAL
hsa-miR-365b-5p	18.1077	22.0901	1.21993	0.2868	0.833175	NEUTRAL	MKS1	3.58766	6.09266	0.764029	0.99965	NEUTRAL
hsa-miR-365b-5p	18.1077	22.0901	1.21993	0.2868	0.833175	NEUTRAL	MKS1	3.58766	6.09266	0.764029	0.99965	NEUTRAL
hsa-miR-365b-5p	18.1077	22.0901	1.21993	0.2868	0.833175	NEUTRAL	MKS1	3.58766	6.09266	0.764029	0.99965	NEUTRAL
hsa-miR-365b-5p	18.1077	22.0901	1.21993	0.2868	0.833175	NEUTRAL	MKS1	3.58766	6.09266	0.764029	0.99965	NEUTRAL
hsa-miR-365b-5p	18.1077	22.0901	1.21993	0.2868	0.833175	NEUTRAL	MKS1	3.58766	6.09266	0.764029	0.99965	NEUTRAL
hsa-miR-365b-5p	18.1077	22.0901	1.21993	0.2868	0.833175	NEUTRAL	MKS1	3.58766	6.09266	0.764029	0.99965	NEUTRAL
hsa-miR-365b-5p	18.1077	22.0901	1.21993	0.2868	0.833175	NEUTRAL	MKS1	3.58766	6.09266	0.764029	0.99965	NEUTRAL
hsa-miR-214-3p	1156.63	1241.46	1.07335	0.102118	0.892839	NEUTRAL	MKS1	3.58766	6.09266	0.764029	0.99965	NEUTRAL
hsa-miR-4488	3153	1214.07	0.385053	-1.37687	0.0624724	DOWN	MKS1	3.58766	6.09266	0.764029	0.99965	NEUTRAL
hsa-miR-4488	3153	1214.07	0.385053	-1.37687	0.0624724	DOWN	MKS1	3.58766	6.09266	0.764029	0.99965	NEUTRAL
hsa-miR-4488	3153	1214.07	0.385053	-1.37687	0.0624724	DOWN	MKS1	3.58766	6.09266	0.764029	0.99965	NEUTRAL
hsa-miR-4488	3153	1214.07	0.385053	-1.37687	0.0624724	DOWN	MKS1	3.58766	6.09266	0.764029	0.99965	NEUTRAL
hsa-miR-4488	3153	1214.07	0.385053	-1.37687	0.0624724	DOWN	MKS1	3.58766	6.09266	0.764029	0.99965	NEUTRAL
hsa-miR-4488	3153	1214.07	0.385053	-1.37687	0.0624724	DOWN	MKS1	3.58766	6.09266	0.764029	0.99965	NEUTRAL
[truncated: 65,897 more rows]
